# Supplementary material for: Genome-Wide Expression Profiles of Hemp (Cannabis sativa L.) in Response to Drought Stress
Source: Hindawi journal article supplement (doi:10.1155/2018/3057272), 2018-01-01
Supplement: f1 [file 3057272.f1.pdf]

FIGURE S1

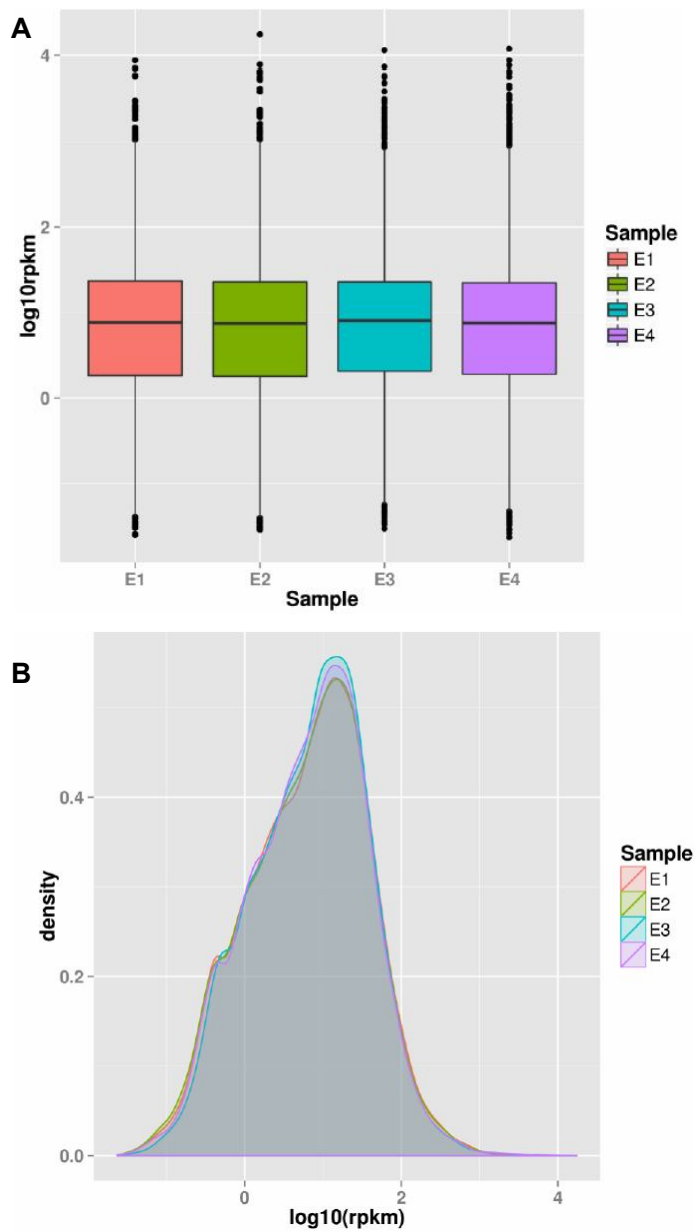

**Figure S1: RPKM distribution and RPKM density distribution of different genes in the DS and CK hemp.** **A:** box-plot of RPKM. x-axis means sample names, y-axis means  $\log_{10}(\text{RPKM})$ . **B:** RPKM distribution. x-axis represent  $\log_{10}(\text{RPKM})$ , y-axis represent gene density. E1, E2, E3 and E4 represent DS1, DS2, CK1 and CK2, respectively.

FIGURE S2

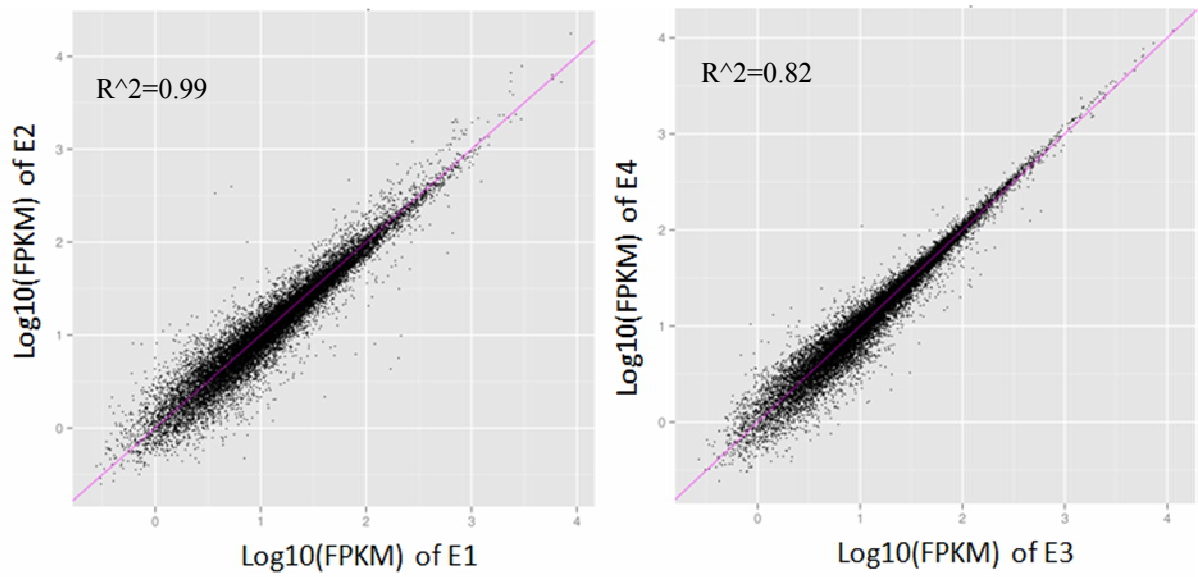

FIGURE S2: Correlations between two repeats of the CK and DS samples. E1 and E2 represent DS1 and DS2, and E3 and E4 represent CK1 and CK2, respectively. The logarithmic values of (FPKM) for each gene in the two replicates were assigned as coordinate values of the two axes.
