# Supplementary material for: Genome-Wide Expression Profiles of Hemp (Cannabis sativa L.) in Response to Drought Stress
Source: Int J Genomics. 2018 May 15;2018:3057272. doi: 10.1155/2018/3057272 (PMC5976996; doi:10.1155/2018/3057272)
Supplement: Supplementary 2 — Table S1: the sequence of primers used for qRT-PCR analysis. [file 3057272.f2.xls]

## Sheet: Sheet1
Name	Gene discription	ID	Sense	Anti-sense	Amplicons (bp)	Tm (℃)
Actin	Actin	AGQN01269064	CCAATAGCCTTGCATTCCAT	TCGATTGGAAAGCCGAATAC	172	55
PYL4	Abscisic acid receptor PYL4	JP449530	AAAATGCCAGTGAATCCG	TGGTCCGCTCTAATCTCG	170	55
PP2C-1	Protein phosphatase 2C	JP474397	GGGTTGATCTTGCTGCTC	AACGCTAATGTTGTCCTTGC	83	55
PP2C-2	Protein phosphatase 2C	JP473042	CCGTAGGTTGATGATGAG	CATTGCCTTAGTTGTCGT	171	55
PP2C-3	Protein phosphatase 2C	JP478284	CAGTTACATCGCCGTGAA	ACAGCGTCTTCCATCTCG	170	55
PP2C-4	Protein phosphatase 2C	JP477418	CAAGAGCCATAGGAGACAA	AGGCACATACGGACAACG	163	55
PP2C-5	Protein phosphatase 2C	JP469562	AACGGTGCTAGAGTATTT	TAGATCGCATAGGGAGTA	86	55
PP2C-6	Protein phosphatase 2C	JP455237	GACGACGACTGTCTGATTT	GGTGATACCGAAGACGAG	134	55
SAPK3	Serine/threonine-protein kinase	JP477935	TGGAGCTTATCCCTTTGA	TTCGCTTGATTGGTCTTT	249	55
X15-1	Auxin-induced protein X15	JP473847	TTTGGCAGTTTATGTTGG	TGTGCAGGGAATTGTTAG	150	55
X15-2	Auxin-induced protein X15	JP472037	ATGGTGGTGATAATAACGG	AGGGCTGAGAAGCTGATA	116	55
IAA-1	indole-3-acetic acid amido synthetase	JP480028	ACGGAGTGTCGTAAGGAG	GAAGAAGCGTACATAGTGC	161	55
IAA-2	Indole-3-acetic acid-induced protein ARG7	JP461329	GACACTTGGTGGTTTGCG	TGCCCGAGTTACCTGAAT	213	55
