# Supplementary material for: Genome-Wide Expression Profiles of Hemp (Cannabis sativa L.) in Response to Drought Stress
Source: Int J Genomics. 2018 May 15;2018:3057272. doi: 10.1155/2018/3057272 (PMC5976996; doi:10.1155/2018/3057272)
Supplement: Supplementary 3 — Table S2: summary of DEGs annotated by 5 databases. [file 3057272.f3.xls]

## Sheet: Table S2
#ID	FDR	log2FC	regulated	COG_class	COG_class_annotation	GO_annotation	KEGG_annotation	Swissprot_annotation	nr_annotation
gi_351627862_gb_JP480745.1	0.00278319	-9.00053	down	--	--	--	--	Putative ribonuclease H protein At1g65750 OS=Arabidopsis thaliana GN=At1g65750 PE=3 SV=1	conserved hypothetical protein [Ricinus communis]
gi_351602346_gb_JP456771.1	1.35e-24	-8.25431	down	--	--	--	--	--	PREDICTED: uncharacterized protein LOC100853389 [Vitis vinifera]
gi_351604400_gb_JP458752.1	2.36e-24	-8.23806	down	--	--	Molecular Function: protein binding (GO:0005515);; Cellular Component: nucleus (GO:0005634);; Cellular Component: plasma membrane (GO:0005886);; Biological Process: cellular protein localization (GO:0034613);; Biological Process: regulation of biological process (GO:0050789);;	--	B3 domain-containing transcription factor VRN1 OS=Arabidopsis thaliana GN=VRN1 PE=1 SV=1	unnamed protein product [Vitis vinifera]
gi_351618362_gb_JP472663.1	5.54e-30	-7.43553	down	--	--	Molecular Function: binding (GO:0005488);; Cellular Component: nucleus (GO:0005634);; Cellular Component: vacuole (GO:0005773);; Biological Process: protein localization (GO:0008104);; Biological Process: cellular process (GO:0009987);; Cellular Component: intracellular organelle part (GO:0044446);; Biological Process: regulation of biological process (GO:0050789);;	--	Putative B3 domain-containing protein REM15 OS=Arabidopsis thaliana GN=REM15.15 PE=3 SV=2	AP2/B3-like transcriptional factor family protein, putative [Theobroma cacao]
gi_351623654_gb_JP477955.1	2.18e-30	-7.10346	down	--	--	Molecular Function: enzyme inhibitor activity (GO:0004857);; Cellular Component: cell wall (GO:0005618);; Biological Process: anion transport (GO:0006820);; Biological Process: response to stress (GO:0006950);; Biological Process: metabolic process (GO:0008152);; Cellular Component: membrane (GO:0016020);; Biological Process: cellular component organization (GO:0016043);; Molecular Function: pect…	--	21 kDa protein OS=Daucus carota PE=2 SV=1	hypothetical protein PRUPE_ppa011607mg [Prunus persica]
gi_351629415_gb_JP482298.1	1.27e-24	-6.53245	down	--	--	Molecular Function: protein binding (GO:0005515);; Cellular Component: nucleus (GO:0005634);; Cellular Component: plasma membrane (GO:0005886);; Biological Process: cellular protein localization (GO:0034613);; Biological Process: regulation of biological process (GO:0050789);;	--	B3 domain-containing protein REM19 OS=Arabidopsis thaliana GN=REM19 PE=2 SV=1	PREDICTED: B3 domain-containing protein LOC_Os12g40080-like [Fragaria vesca subsp. vesca]
gi_351628903_gb_JP481786.1	0.000251199	-6.30971	down	--	--	Molecular Function: nucleotide binding (GO:0000166);; Molecular Function: protein serine/threonine kinase activity (GO:0004674);; Molecular Function: protein tyrosine kinase activity (GO:0004713);; Cellular Component: nucleus (GO:0005634);; Cellular Component: vacuole (GO:0005773);; Cellular Component: plasma membrane (GO:0005886);; Biological Process: defense response (GO:0006952);; Cellular Com…	--	G-type lectin S-receptor-like serine/threonine-protein kinase At1g11410 OS=Arabidopsis thaliana GN=At1g11410 PE=3 SV=3	hypothetical protein PRUPE_ppa001615mg [Prunus persica]
gi_351608774_gb_JP463078.1	3e-07	-6.22545	down	--	--	--	--	--	PREDICTED: uncharacterized protein LOC100263584 [Vitis vinifera]
gi_351617498_gb_JP471799.1	2.03e-56	-5.79119	down	--	--	Cellular Component: extracellular region (GO:0005576);; Cellular Component: plasmodesma (GO:0009506);; Biological Process: gibberellic acid mediated signaling pathway (GO:0009740);; Biological Process: response to sucrose stimulus (GO:0009744);; Biological Process: response to glucose stimulus (GO:0009749);; Biological Process: response to fructose stimulus (GO:0009750);; Biological Process: resp…	--	Gibberellin-regulated protein 6 OS=Arabidopsis thaliana GN=GASA6 PE=2 SV=1	hypothetical protein PRUPE_ppa013704mg [Prunus persica]
gi_351611514_gb_JP465815.1	2.19e-51	-5.72995	down	--	--	Cellular Component: extracellular region (GO:0005576);; Biological Process: lipid transport (GO:0006869);; Molecular Function: lipid binding (GO:0008289);;	--	14 kDa proline-rich protein DC2.15 OS=Daucus carota PE=2 SV=1	PREDICTED: 14 kDa proline-rich protein DC2.15-like [Fragaria vesca subsp. vesca]
gi_351612687_gb_JP466988.1	5.56e-26	-5.62507	down	--	--	--	--	--	PREDICTED: uncharacterized protein LOC101502259 [Cicer arietinum]
gi_351629055_gb_JP481938.1	0.000507284	-5.5997	down	[ER]	--	Cellular Component: plasma membrane (GO:0005886);; Biological Process: cellular response to nitrogen starvation (GO:0006995);; Molecular Function: urea transmembrane transporter activity (GO:0015204);; Molecular Function: solute:sodium symporter activity (GO:0015370);; Cellular Component: integral to membrane (GO:0016021);; Biological Process: sodium ion transmembrane transport (GO:0035725);; Bio…	--	Urea-proton symporter DUR3 OS=Arabidopsis thaliana GN=DUR3 PE=1 SV=1	hypothetical protein PRUPE_ppa002143mg [Prunus persica]
gi_351615029_gb_JP469330.1	0.00021791	-5.3987	down	[RTKL]	--	Biological Process: respiratory burst involved in defense response (GO:0002679);; Molecular Function: protein serine/threonine kinase activity (GO:0004674);; Molecular Function: ATP binding (GO:0005524);; Cellular Component: nucleus (GO:0005634);; Cellular Component: plasma membrane (GO:0005886);; Biological Process: protein phosphorylation (GO:0006468);; Biological Process: protein targeting to …	--	G-type lectin S-receptor-like serine/threonine-protein kinase SD1-1 OS=Arabidopsis thaliana GN=SD11 PE=1 SV=1	predicted protein [Populus trichocarpa]
gi_351612398_gb_JP466699.1	2.28e-05	-5.3138	down	--	--	Cellular Component: mitochondrion (GO:0005739);; Cellular Component: mitochondrial inner membrane (GO:0005743);; Biological Process: mitochondrial transport (GO:0006839);; Cellular Component: integral to membrane (GO:0016021);; Biological Process: transmembrane transport (GO:0055085);;	--	Solute carrier family 25 member 44 OS=Mus musculus GN=Slc25a44 PE=2 SV=1	hypothetical protein PRUPE_ppa008656mg [Prunus persica]
gi_351617194_gb_JP471495.1	0.000534173	-5.21119	down	--	--	Molecular Function: binding (GO:0005488);; Cellular Component: cell part (GO:0044464);;	--	Putative disease resistance protein RGA1 OS=Solanum bulbocastanum GN=RGA1 PE=2 SV=2	PREDICTED: putative disease resistance RPP13-like protein 1-like [Fragaria vesca subsp. vesca]
gi_351600192_gb_JP454664.1	8.85e-06	-5.16048	down	--	--	Molecular Function: binding (GO:0005488);; Biological Process: defense response (GO:0006952);; Cellular Component: cell part (GO:0044464);;	--	Disease resistance protein RPM1 OS=Arabidopsis thaliana GN=RPM1 PE=1 SV=1	hypothetical protein PRUPE_ppa001015mg [Prunus persica]
gi_351603090_gb_JP457450.1	2.54e-19	-5.00074	down	--	--	Cellular Component: Golgi apparatus (GO:0005794);; Cellular Component: plasma membrane (GO:0005886);; Biological Process: steroid biosynthetic process (GO:0006694);; Cellular Component: plant-type cell wall (GO:0009505);; Cellular Component: plasmodesma (GO:0009506);; Biological Process: secondary cell wall biogenesis (GO:0009834);; Biological Process: tissue development (GO:0009888);; Biological…	--	Fasciclin-like arabinogalactan protein 12 OS=Arabidopsis thaliana GN=FLA12 PE=2 SV=2	hypothetical protein PRUPE_ppa023379mg [Prunus persica]
gi_351596480_gb_JP451036.1	2.72e-07	-4.96254	down	--	--	--	--	--	hypothetical protein VITISV_003517 [Vitis vinifera]
gi_351619526_gb_JP473827.1	9.4e-18	-4.93519	down	--	--	Molecular Function: magnesium ion binding (GO:0000287);; Cellular Component: cytosol (GO:0005829);; Biological Process: response to heat (GO:0009408);; Biological Process: response to cold (GO:0009409);; Cellular Component: chloroplast stroma (GO:0009570);; Biological Process: response to wounding (GO:0009611);; Biological Process: response to insect (GO:0009625);; Biological Process: response to…	--	(E,E)-alpha-farnesene synthase OS=Malus domestica GN=AFS1 PE=1 SV=2	farnesene synthase [Pyrus communis]
gi_351591627_gb_JP450073.1	9.94e-68	-4.93358	down	--	--	Biological Process: transition metal ion transport (GO:0000041);; Molecular Function: superoxide dismutase activity (GO:0004784);; Cellular Component: cell wall (GO:0005618);; Cellular Component: nucleus (GO:0005634);; Cellular Component: cytoplasm (GO:0005737);; Biological Process: L-fucose biosynthetic process (GO:0006005);; Biological Process: response to cold (GO:0009409);; Cellular Component…	--	Auxin-binding protein ABP19a OS=Prunus persica GN=ABP19A PE=3 SV=1	PREDICTED: auxin-binding protein ABP19a-like [Fragaria vesca subsp. vesca]
gi_351610836_gb_JP465137.1	0.00304452	-4.85648	down	--	--	--	--	--	hypothetical protein PRUPE_ppa016690mg [Prunus persica]
gi_351617896_gb_JP472197.1	0.00475657	-4.8515	down	--	--	Biological Process: respiratory burst involved in defense response (GO:0002679);; Molecular Function: peroxidase activity (GO:0004601);; Cellular Component: nucleus (GO:0005634);; Cellular Component: endoplasmic reticulum (GO:0005783);; Cellular Component: Golgi apparatus (GO:0005794);; Cellular Component: plasma membrane (GO:0005886);; Biological Process: protein targeting to membrane (GO:000661…	--	Peroxidase 3 OS=Arabidopsis thaliana GN=PER3 PE=2 SV=1	hypothetical protein PRUPE_ppa024711mg [Prunus persica]
gi_351596723_gb_JP451278.1	7.82e-07	-4.79344	down	--	--	Molecular Function: binding (GO:0005488);; Molecular Function: S-adenosylmethionine-dependent methyltransferase activity (GO:0008757);; Biological Process: cellular metabolic process (GO:0044237);; Biological Process: primary metabolic process (GO:0044238);; Biological Process: organic substance metabolic process (GO:0071704);;	--	Probable S-adenosylmethionine-dependent methyltransferase At5g38780 OS=Arabidopsis thaliana GN=At5g38780 PE=2 SV=1	hypothetical protein PRUPE_ppa025407mg [Prunus persica]
gi_351596516_gb_JP451072.1	0.00378334	-4.77332	down	--	--	Molecular Function: binding (GO:0005488);;	--	--	hypothetical protein PRUPE_ppa015900mg [Prunus persica]
gi_351596671_gb_JP451226.1	2.6e-19	-4.75489	down	--	--	Molecular Function: enzyme inhibitor activity (GO:0004857);; Molecular Function: hydrolase activity (GO:0016787);; Molecular Function: pectinesterase activity (GO:0030599);; Biological Process: negative regulation of catalytic activity (GO:0043086);;	--	21 kDa protein OS=Daucus carota PE=2 SV=1	hypothetical protein PRUPE_ppa011607mg [Prunus persica]
gi_351600269_gb_JP454740.1	0.000188379	-4.74116	down	--	--	Molecular Function: protein binding (GO:0005515);; Biological Process: iron ion transport (GO:0006826);; Cellular Component: plastid (GO:0009536);; Biological Process: cellular response to iron ion starvation (GO:0010106);; Biological Process: response to nitrate (GO:0010167);; Biological Process: myo-inositol hexakisphosphate biosynthetic process (GO:0010264);; Molecular Function: arsenite trans…	--	Aquaporin NIP2-2 OS=Oryza sativa subsp. japonica GN=NIP2-2 PE=2 SV=1	PREDICTED: aquaporin NIP2-1-like [Vitis vinifera]
gi_351614184_gb_JP468485.1	3.02e-19	-4.7105	down	--	--	Cellular Component: Golgi apparatus (GO:0005794);; Cellular Component: plasma membrane (GO:0005886);; Biological Process: multicellular organismal development (GO:0007275);; Cellular Component: plant-type cell wall (GO:0009505);; Cellular Component: plasmodesma (GO:0009506);; Biological Process: response to salt stress (GO:0009651);; Biological Process: multidimensional cell growth (GO:0009825);;…	--	Fasciclin-like arabinogalactan protein 12 OS=Arabidopsis thaliana GN=FLA12 PE=2 SV=2	hypothetical protein PRUPE_ppa026177mg [Prunus persica]
gi_351606933_gb_JP461258.1	1.55e-07	-4.65312	down	--	--	--	--	Uncharacterized protein At2g29880 OS=Arabidopsis thaliana GN=At2g29880 PE=2 SV=1	PREDICTED: uncharacterized protein LOC101503423 [Cicer arietinum]
gi_351603592_gb_JP457949.1	0.000511476	-4.58519	down	--	--	Cellular Component: nucleus (GO:0005634);; Molecular Function: zinc ion binding (GO:0008270);;	--	DNA damage response protein WSS1 OS=Saccharomyces cerevisiae (strain ATCC 204508 / S288c) GN=WSS1 PE=1 SV=1	PREDICTED: DNA damage response protein WSS1 [Vitis vinifera]
gi_351600932_gb_JP455389.1	1.36e-09	-4.57991	down	--	--	Cellular Component: Golgi apparatus (GO:0005794);; Cellular Component: plant-type cell wall (GO:0009505);; Cellular Component: plasmodesma (GO:0009506);; Cellular Component: anchored to plasma membrane (GO:0046658);;	--	Fasciclin-like arabinogalactan protein 12 OS=Arabidopsis thaliana GN=FLA12 PE=2 SV=2	conserved hypothetical protein [Ricinus communis]
gi_351603878_gb_JP458233.1	1.12e-12	-4.54352	down	--	--	Biological Process: polysaccharide biosynthetic process (GO:0000271);; Biological Process: polysaccharide catabolic process (GO:0000272);; Cellular Component: mitochondrial respiratory chain complex III (GO:0005750);; Cellular Component: vacuolar membrane (GO:0005774);; Biological Process: starch metabolic process (GO:0005982);; Biological Process: glycolysis (GO:0006096);; Biological Process: ca…	--	COBRA-like protein 4 OS=Arabidopsis thaliana GN=COBL4 PE=2 SV=2	hypothetical protein PRUPE_ppa005430mg [Prunus persica]
gi_351618155_gb_JP472456.1	1.35e-24	-4.53673	down	--	--	Cellular Component: vacuole (GO:0005773);;	--	BRO1 domain-containing protein BROX homolog OS=Caenorhabditis elegans GN=B0507.2 PE=3 SV=2	hypothetical protein PRUPE_ppa019779mg [Prunus persica]
gi_351603277_gb_JP457636.1	0.000919414	-4.52134	down	--	--	Molecular Function: binding (GO:0005488);; Biological Process: defense response (GO:0006952);;	--	Putative disease resistance protein RGA3 OS=Solanum bulbocastanum GN=RGA3 PE=2 SV=2	putative CC-NBS-LRR resistance protein [Malus domestica]
gi_351602166_gb_JP456597.1	2.33e-12	-4.48066	down	--	--	Cellular Component: Golgi apparatus (GO:0005794);; Cellular Component: plasma membrane (GO:0005886);; Cellular Component: plant-type cell wall (GO:0009505);; Cellular Component: plasmodesma (GO:0009506);; Biological Process: secondary cell wall biogenesis (GO:0009834);; Biological Process: cellular process (GO:0009987);; Cellular Component: cytoplasmic membrane-bounded vesicle (GO:0016023);; Cell…	--	Fasciclin-like arabinogalactan protein 11 OS=Arabidopsis thaliana GN=FLA11 PE=2 SV=2	fasciclin-like arabinogalactan protein 11 [Arabidopsis thaliana]
gi_351597668_gb_JP452210.1	1.12e-17	-4.47726	down	--	--	Cellular Component: cytoplasm (GO:0005737);; Cellular Component: plasma membrane (GO:0005886);; Biological Process: protein targeting to membrane (GO:0006612);; Biological Process: oligopeptide transport (GO:0006857);; Biological Process: nucleotide transport (GO:0006862);; Biological Process: ER to Golgi vesicle-mediated transport (GO:0006888);; Biological Process: cellular membrane fusion (GO:0…	--	Oligopeptide transporter 7 OS=Arabidopsis thaliana GN=OPT7 PE=2 SV=1	hypothetical protein PRUPE_ppa001827mg [Prunus persica]
gi_351619593_gb_JP473894.1	2.13e-51	-4.42768	down	[RTKL]	--	Molecular Function: protein serine/threonine kinase activity (GO:0004674);; Molecular Function: transmembrane receptor protein serine/threonine kinase activity (GO:0004675);; Molecular Function: ATP binding (GO:0005524);; Cellular Component: extracellular region (GO:0005576);; Cellular Component: nucleus (GO:0005634);; Cellular Component: vacuole (GO:0005773);; Cellular Component: plasma membrane…	--	G-type lectin S-receptor-like serine/threonine-protein kinase At4g27290 OS=Arabidopsis thaliana GN=At4g27290 PE=3 SV=4	predicted protein [Populus trichocarpa]
gi_351618512_gb_JP472813.1	5.88e-10	-4.32759	down	--	--	Biological Process: transition metal ion transport (GO:0000041);; Molecular Function: sequence-specific DNA binding transcription factor activity (GO:0003700);; Molecular Function: transcription cofactor activity (GO:0003712);; Cellular Component: nucleus (GO:0005634);; Cellular Component: cytoplasm (GO:0005737);; Cellular Component: vacuole (GO:0005773);; Cellular Component: plasma membrane (GO:…	--	CEN-like protein 2 OS=Nicotiana tabacum GN=CET2 PE=2 SV=1	terminal flower 1 [Vitis labrusca]
gi_351600324_gb_JP454795.1	7.28e-06	-4.30979	down	--	--	Biological Process: defense response to nematode (GO:0002215);; Biological Process: respiratory burst involved in defense response (GO:0002679);; Molecular Function: peroxidase activity (GO:0004601);; Cellular Component: extracellular region (GO:0005576);; Cellular Component: nucleus (GO:0005634);; Cellular Component: vacuolar membrane (GO:0005774);; Cellular Component: Golgi apparatus (GO:000579…	K00430|1e-156|vvi:100262330|hypothetical protein LOC100262330	Peroxidase 27 OS=Arabidopsis thaliana GN=PER27 PE=1 SV=1	hypothetical protein PRUPE_ppa023088mg [Prunus persica]
gi_351616280_gb_JP470581.1	8.71e-19	-4.28321	down	--	--	Molecular Function: catalytic activity (GO:0003824);; Molecular Function: binding (GO:0005488);;	--	Putative ribonuclease H protein At1g65750 OS=Arabidopsis thaliana GN=At1g65750 PE=3 SV=1	hypothetical protein PRUPE_ppa016553mg [Prunus persica]
gi_351616614_gb_JP470915.1	0.00213305	-4.23943	down	--	--	Cellular Component: extracellular space (GO:0005615);; Biological Process: lipid metabolic process (GO:0006629);; Biological Process: defense response (GO:0006952);; Biological Process: systemic acquired resistance (GO:0009627);; Biological Process: response to hormone stimulus (GO:0009725);; Biological Process: response to salicylic acid stimulus (GO:0009751);; Biological Process: defense respon…	--	GDSL esterase/lipase 1 OS=Arabidopsis thaliana GN=GLIP1 PE=1 SV=1	PREDICTED: GDSL esterase/lipase 5-like [Fragaria vesca subsp. vesca]
gi_351623573_gb_JP477874.1	2.69e-35	-4.18967	down	--	--	--	--	Putative cell wall protein OS=Arabidopsis thaliana GN=At2g20870 PE=2 SV=2	hypothetical protein PRUPE_ppa023037mg [Prunus persica]
gi_351591095_gb_JP449551.1	2.19e-12	-4.1861	down	--	--	--	--	Ankyrin repeat-containing protein At2g01680 OS=Arabidopsis thaliana GN=At2g01680 PE=1 SV=1	PREDICTED: ankyrin repeat-containing protein At3g12360-like [Fragaria vesca subsp. vesca]
gi_351615704_gb_JP470005.1	6.83e-05	-4.16109	down	--	--	--	--	--	PREDICTED: uncharacterized protein LOC100247733 [Vitis vinifera]
gi_351628346_gb_JP481229.1	0.00317025	-4.10883	down	[CR]	--	Molecular Function: nucleotide binding (GO:0000166);; Molecular Function: nucleic acid binding (GO:0003676);; Molecular Function: NADPH:quinone reductase activity (GO:0003960);; Cellular Component: vacuole (GO:0005773);; Cellular Component: Golgi apparatus (GO:0005794);; Cellular Component: cytosol (GO:0005829);; Cellular Component: plasma membrane (GO:0005886);; Biological Process: metabolic pro…	--	Putative quinone-oxidoreductase homolog, chloroplastic OS=Arabidopsis thaliana GN=At4g13010 PE=2 SV=1	hypothetical protein PRUPE_ppa008401mg [Prunus persica]
gi_351625732_gb_JP480033.1	9.9e-13	-4.07714	down	--	--	Cellular Component: endosome (GO:0005768);; Cellular Component: Golgi apparatus (GO:0005794);; Cellular Component: trans-Golgi network (GO:0005802);;	--	Uncharacterized protein At1g04910 OS=Arabidopsis thaliana GN=At1g04910 PE=1 SV=1	hypothetical protein PRUPE_ppa026308mg [Prunus persica]
gi_351598388_gb_JP452913.1	0.00481053	-4.06373	down	--	--	Molecular Function: protein binding (GO:0005515);; Molecular Function: GTP binding (GO:0005525);; Cellular Component: nucleus (GO:0005634);; Biological Process: response to auxin stimulus (GO:0009733);; Biological Process: response to gibberellin stimulus (GO:0009739);; Biological Process: positive regulation of flower development (GO:0009911);; Biological Process: vegetative to reproductive phas…	--	Flowering-promoting factor 1-like protein 2 OS=Arabidopsis thaliana GN=FLP2 PE=2 SV=1	hypothetical protein PRUPE_ppa013757mg [Prunus persica]
gi_351614132_gb_JP468433.1	1.77e-07	-4.04065	down	--	--	Cellular Component: Golgi apparatus (GO:0005794);; Cellular Component: plant-type cell wall (GO:0009505);; Cellular Component: plasmodesma (GO:0009506);; Cellular Component: anchored to plasma membrane (GO:0046658);;	--	Fasciclin-like arabinogalactan protein 11 OS=Arabidopsis thaliana GN=FLA11 PE=2 SV=2	conserved hypothetical protein [Ricinus communis]
gi_351624855_gb_JP479156.1	2.54e-28	-4.02259	down	[QR]	--	Cellular Component: cytoplasm (GO:0005737);; Biological Process: isoflavonoid phytoalexin biosynthetic process (GO:0009701);; Biological Process: flavonoid metabolic process (GO:0009812);; Biological Process: alkaloid biosynthetic process (GO:0009821);; Molecular Function: catechol O-methyltransferase activity (GO:0016206);; Molecular Function: isoflavone 4'-O-methyltransferase activity (GO:00307…	--	Trans-resveratrol di-O-methyltransferase OS=Vitis vinifera GN=ROMT PE=1 SV=2	O-methyltransferase 3 [Humulus lupulus]
gi_351612813_gb_JP467114.1	0.00725859	-4.0131	down	--	--	Cellular Component: extracellular region (GO:0005576);; Cellular Component: cytoplasmic membrane-bounded vesicle (GO:0016023);;	--	Kiwellin OS=Actinidia deliciosa PE=1 SV=1	kiwellin [Actinidia arguta]
gi_351627529_gb_JP480412.1	0.00590753	-4.01197	down	--	--	Molecular Function: catechol oxidase activity (GO:0004097);; Molecular Function: copper ion binding (GO:0005507);; Cellular Component: vacuolar lumen (GO:0005775);; Cellular Component: chloroplast (GO:0009507);; Cellular Component: thylakoid (GO:0009579);; Molecular Function: aureusidin synthase activity (GO:0033793);; Biological Process: pigment biosynthetic process (GO:0046148);; Molecular Func…	--	Polyphenol oxidase, chloroplastic OS=Malus domestica PE=2 SV=1	polyphenol oxidase [Prunus salicina var. cordata]
gi_351620046_gb_JP474347.1	6.3e-08	-3.98347	down	--	--	Molecular Function: carboxylesterase activity (GO:0004091);; Cellular Component: extracellular region (GO:0005576);; Biological Process: lipid metabolic process (GO:0006629);; Cellular Component: chloroplast (GO:0009507);; Biological Process: response to salicylic acid stimulus (GO:0009751);; Biological Process: stomatal complex morphogenesis (GO:0010103);; Biological Process: response to lithium…	--	GDSL esterase/lipase LTL1 OS=Arabidopsis thaliana GN=LTL1 PE=2 SV=1	PREDICTED: GDSL esterase/lipase At5g33370-like [Fragaria vesca subsp. vesca]
gi_351601889_gb_JP456326.1	0.00892014	-3.97554	down	--	--	Cellular Component: chloroplast (GO:0009507);; Biological Process: thylakoid membrane organization (GO:0010027);; Biological Process: photosystem II oxygen evolving complex assembly (GO:0010270);;	--	--	PREDICTED: uncharacterized LOC101208184 [Cucumis sativus]
gi_351604038_gb_JP458392.1	1.31e-12	-3.97363	down	--	--	Biological Process: glucuronoxylan metabolic process (GO:0010413);; Biological Process: xylan biosynthetic process (GO:0045492);;	--	Protein IQ-DOMAIN 1 OS=Arabidopsis thaliana GN=IQD1 PE=1 SV=1	PREDICTED: protein IQ-DOMAIN 1-like [Glycine max]
gi_351596692_gb_JP451247.1	0.00721562	-3.97008	down	--	--	Molecular Function: carbohydrate binding (GO:0030246);;	--	Rhamnogalacturonate lyase OS=Dickeya dadantii (strain 3937) GN=rhiE PE=1 SV=1	hypothetical protein PRUPE_ppa014556mg [Prunus persica]
gi_351623597_gb_JP477898.1	3.44e-10	-3.94789	down	--	--	--	--	--	PREDICTED: uncharacterized protein LOC101490811 [Cicer arietinum]
gi_351625838_gb_JP480139.1	0.0059168	-3.94219	down	--	--	Biological Process: defense response (GO:0006952);; Biological Process: response to biotic stimulus (GO:0009607);; Biological Process: response to organic substance (GO:0010033);; Molecular Function: hydrolase activity (GO:0016787);; Biological Process: cellular metabolic process (GO:0044237);; Cellular Component: cell part (GO:0044464);; Biological Process: regulation of cellular process (GO:005…	--	Basic 7S globulin 2 OS=Glycine max PE=1 SV=1	xyloglucanase inhibitor 1 [Humulus lupulus]
gi_351610610_gb_JP464911.1	0.00023624	-3.87839	down	--	--	--	--	--	conserved hypothetical protein [Ricinus communis]
gi_351615270_gb_JP469571.1	0.000504103	-3.8512	down	--	--	Cellular Component: chloroplast thylakoid membrane (GO:0009535);;	--	--	AT-rich interactive domain-containing protein 5A, putative [Theobroma cacao]
gi_351617165_gb_JP471466.1	0.0099036	-3.84285	down	--	--	Molecular Function: catalytic activity (GO:0003824);; Molecular Function: binding (GO:0005488);;	--	Retrovirus-related Pol polyprotein from transposon TNT 1-94 OS=Nicotiana tabacum PE=2 SV=1	hypothetical protein VITISV_030567 [Vitis vinifera]
gi_351613743_gb_JP468044.1	4.4e-11	-3.82731	down	--	--	Molecular Function: protein binding (GO:0005515);; Cellular Component: Golgi apparatus (GO:0005794);; Cellular Component: plasma membrane (GO:0005886);; Cellular Component: plant-type cell wall (GO:0009505);; Cellular Component: plasmodesma (GO:0009506);; Biological Process: secondary cell wall biogenesis (GO:0009834);; Biological Process: cell growth (GO:0016049);; Cellular Component: nuclear bo…	--	Fasciclin-like arabinogalactan protein 12 OS=Arabidopsis thaliana GN=FLA12 PE=2 SV=2	hypothetical protein PRUPE_ppa026177mg [Prunus persica]
gi_351625417_gb_JP479718.1	2.28e-09	-3.80823	down	--	--	Biological Process: activation of MAPKK activity (GO:0000186);; Biological Process: respiratory burst involved in defense response (GO:0002679);; Molecular Function: protein kinase activity (GO:0004672);; Molecular Function: MAP kinase kinase kinase activity (GO:0004709);; Molecular Function: transmembrane receptor protein tyrosine kinase activity (GO:0004714);; Molecular Function: ATP binding (G…	--	G-type lectin S-receptor-like serine/threonine-protein kinase At4g27290 OS=Arabidopsis thaliana GN=At4g27290 PE=3 SV=4	predicted protein [Populus trichocarpa]
gi_351620970_gb_JP475271.1	0.000106416	-3.80737	down	--	--	Molecular Function: catalytic activity (GO:0003824);;	--	Retrovirus-related Pol polyprotein from transposon TNT 1-94 OS=Nicotiana tabacum PE=2 SV=1	hypothetical protein VITISV_024648 [Vitis vinifera]
gi_351604650_gb_JP459000.1	0.00241303	-3.80445	down	[RTKL]	--	Biological Process: MAPK cascade (GO:0000165);; Biological Process: respiratory burst involved in defense response (GO:0002679);; Molecular Function: protein serine/threonine kinase activity (GO:0004674);; Cellular Component: extracellular region (GO:0005576);; Cellular Component: vacuole (GO:0005773);; Cellular Component: plasma membrane (GO:0005886);; Biological Process: N-terminal protein myri…	--	G-type lectin S-receptor-like serine/threonine-protein kinase At4g03230 OS=Arabidopsis thaliana GN=At4g03230 PE=3 SV=3	PREDICTED: G-type lectin S-receptor-like serine/threonine-protein kinase At4g03230-like, partial [Cucumis sativus]
gi_351620169_gb_JP474470.1	0.000154719	-3.79571	down	[RTKL]	--	Molecular Function: nucleotide binding (GO:0000166);; Biological Process: respiratory burst involved in defense response (GO:0002679);; Molecular Function: protein kinase activity (GO:0004672);; Molecular Function: protein serine/threonine kinase activity (GO:0004674);; Cellular Component: extracellular region (GO:0005576);; Cellular Component: nucleus (GO:0005634);; Cellular Component: vacuole (…	--	G-type lectin S-receptor-like serine/threonine-protein kinase At4g27290 OS=Arabidopsis thaliana GN=At4g27290 PE=3 SV=4	S-locus lectin protein kinase family protein [Theobroma cacao]
gi_351607042_gb_JP461366.1	1.27e-05	-3.75331	down	--	--	Cellular Component: extracellular region (GO:0005576);; Biological Process: response to oxidative stress (GO:0006979);;	--	Phylloplanin OS=Nicotiana tabacum PE=1 SV=1	Pollen Ole e 1 allergen and extensin family protein, putative [Theobroma cacao]
gi_351599671_gb_JP454160.1	3.09e-15	-3.7128	down	--	--	--	--	Putative nuclease HARBI1 OS=Rattus norvegicus GN=Harbi1 PE=2 SV=1	PREDICTED: uncharacterized protein LOC100855100 [Vitis vinifera]
gi_351625169_gb_JP479470.1	0.000119934	-3.69805	down	--	--	Molecular Function: transferase activity, transferring glycosyl groups (GO:0016757);;	--	--	PREDICTED: uncharacterized protein LOC101295084 [Fragaria vesca subsp. vesca]
gi_351622908_gb_JP477209.1	0.00124723	-3.64375	down	[RTKL]	--	Molecular Function: protein serine/threonine kinase activity (GO:0004674);; Molecular Function: transmembrane receptor protein serine/threonine kinase activity (GO:0004675);; Molecular Function: ATP binding (GO:0005524);; Cellular Component: extracellular region (GO:0005576);; Cellular Component: nucleus (GO:0005634);; Cellular Component: vacuole (GO:0005773);; Cellular Component: plasma membrane…	--	G-type lectin S-receptor-like serine/threonine-protein kinase SD1-1 OS=Arabidopsis thaliana GN=SD11 PE=1 SV=1	predicted protein [Populus trichocarpa]
gi_351624658_gb_JP478959.1	1.47e-05	-3.61104	down	--	--	Biological Process: nitrogen compound metabolic process (GO:0006807);; Biological Process: flavonoid biosynthetic process (GO:0009813);; Molecular Function: N-acyltransferase activity (GO:0016410);; Molecular Function: O-acetyltransferase activity (GO:0016413);; Molecular Function: transferase activity (GO:0016740);; Biological Process: primary metabolic process (GO:0044238);; Biological Process:…	--	Salutaridinol 7-O-acetyltransferase OS=Papaver somniferum GN=SALAT PE=1 SV=1	PREDICTED: vinorine synthase-like [Glycine max]
gi_351599343_gb_JP453840.1	0.000114959	-3.59372	down	--	--	Cellular Component: endosome (GO:0005768);; Cellular Component: Golgi apparatus (GO:0005794);; Cellular Component: trans-Golgi network (GO:0005802);; Biological Process: starch metabolic process (GO:0005982);; Biological Process: secondary cell wall biogenesis (GO:0009834);; Biological Process: tissue development (GO:0009888);; Biological Process: glucuronoxylan metabolic process (GO:0010413);; B…	--	Putative UDP-glucuronate:xylan alpha-glucuronosyltransferase 3 OS=Arabidopsis thaliana GN=GUX3 PE=2 SV=1	hypothetical protein PRUPE_ppa002697mg [Prunus persica]
gi_351623516_gb_JP477817.1	2.07e-07	-3.58338	down	[RTKL]	--	Biological Process: immune system process (GO:0002376);; Molecular Function: protein serine/threonine kinase activity (GO:0004674);; Cellular Component: nucleus (GO:0005634);; Cellular Component: vacuole (GO:0005773);; Cellular Component: plasma membrane (GO:0005886);; Biological Process: defense response (GO:0006952);; Cellular Component: plasmodesma (GO:0009506);; Biological Process: pollen-pis…	--	G-type lectin S-receptor-like serine/threonine-protein kinase At4g27290 OS=Arabidopsis thaliana GN=At4g27290 PE=3 SV=4	hypothetical protein PRUPE_ppa014934mg [Prunus persica]
gi_351605183_gb_JP459530.1	0.00626521	-3.57539	down	--	--	Molecular Function: nucleic acid binding (GO:0003676);; Molecular Function: transferase activity, transferring phosphorus-containing groups (GO:0016772);; Biological Process: primary metabolic process (GO:0044238);; Biological Process: cellular macromolecule metabolic process (GO:0044260);;	--	Uncharacterized mitochondrial protein AtMg00310 OS=Arabidopsis thaliana GN=AtMg00310 PE=4 SV=1	hypothetical protein VITISV_016970 [Vitis vinifera]
gi_351620471_gb_JP474772.1	6.56e-16	-3.55984	down	--	--	Biological Process: lipid metabolic process (GO:0006629);; Biological Process: defense response (GO:0006952);; Molecular Function: methyltransferase activity (GO:0008168);; Molecular Function: S-adenosylmethionine-dependent methyltransferase activity (GO:0008757);; Biological Process: response to wounding (GO:0009611);; Biological Process: methylation (GO:0032259);; Cellular Component: intracellu…	--	Theobromine synthase 2 OS=Coffea arabica GN=CTS2 PE=1 SV=1	carboxyl methyltransferase 4 [Humulus lupulus]
gi_351618272_gb_JP472573.1	0.00309598	-3.5528	down	--	--	Biological Process: MAPK cascade (GO:0000165);; Biological Process: regulation of cell growth (GO:0001558);; Biological Process: response to molecule of bacterial origin (GO:0002237);; Molecular Function: protein kinase activity (GO:0004672);; Cellular Component: mitochondrion (GO:0005739);; Cellular Component: endoplasmic reticulum (GO:0005783);; Cellular Component: plasma membrane (GO:0005886);…	--	Probable leucine-rich repeat receptor-like protein kinase At1g35710 OS=Arabidopsis thaliana GN=At1g35710 PE=2 SV=1	hypothetical protein 0_12538_02 [Pinus taeda]
gi_351597092_gb_JP451644.1	0.000297331	-3.53554	down	--	--	Molecular Function: peroxidase activity (GO:0004601);; Molecular Function: protein binding (GO:0005515);; Cellular Component: cell wall (GO:0005618);; Cellular Component: Golgi apparatus (GO:0005794);; Cellular Component: cytosol (GO:0005829);; Biological Process: response to oxidative stress (GO:0006979);; Biological Process: lignin biosynthetic process (GO:0009809);; Cellular Component: cytopla…	--	Cationic peroxidase 1 OS=Arachis hypogaea GN=PNC1 PE=1 SV=2	predicted protein [Populus trichocarpa]
gi_351609416_gb_JP463717.1	0.000459229	-3.49045	down	--	--	Molecular Function: sequence-specific DNA binding transcription factor activity (GO:0003700);; Molecular Function: protein binding (GO:0005515);; Cellular Component: nucleus (GO:0005634);; Biological Process: regulation of transcription, DNA-dependent (GO:0006355);; Biological Process: signal transduction (GO:0007165);; Biological Process: response to xenobiotic stimulus (GO:0009410);; Biological…	--	Transcription factor VIP1 OS=Arabidopsis thaliana GN=VIP1 PE=1 SV=1	PREDICTED: transcription factor VIP1-like [Fragaria vesca subsp. vesca]
gi_351610813_gb_JP465114.1	3.71e-07	-3.48078	down	--	--	--	--	--	PREDICTED: uncharacterized protein LOC101304340 [Fragaria vesca subsp. vesca]
gi_351603123_gb_JP457482.1	3.85e-06	-3.47381	down	--	--	Molecular Function: protein binding (GO:0005515);; Molecular Function: ATP binding (GO:0005524);; Cellular Component: nucleus (GO:0005634);; Cellular Component: vacuole (GO:0005773);; Cellular Component: plasma membrane (GO:0005886);; Biological Process: ATP catabolic process (GO:0006200);; Biological Process: ATP biosynthetic process (GO:0006754);; Biological Process: cation transport (GO:000681…	K01535|1e-156|vvi:100242786|hypothetical protein LOC100242786	Plasma membrane ATPase 4 OS=Nicotiana plumbaginifolia GN=PMA4 PE=1 SV=1	Plasma membrane ATPase 4 isoform 2 [Theobroma cacao]
gi_351597084_gb_JP451636.1	1.85e-09	-3.46112	down	--	--	Cellular Component: plasma membrane (GO:0005886);; Biological Process: post-embryonic development (GO:0009791);; Cellular Component: anchored to membrane (GO:0031225);; Biological Process: cellular metabolic process (GO:0044237);; Biological Process: primary metabolic process (GO:0044238);; Molecular Function: metal ion binding (GO:0046872);; Biological Process: reproductive structure development…	--	Basic blue protein OS=Cucumis sativus PE=1 SV=1	hypothetical protein PRUPE_ppa022496mg [Prunus persica]
gi_351599807_gb_JP454291.1	0.00372143	-3.44425	down	[IQR]	--	Molecular Function: copper ion binding (GO:0005507);; Cellular Component: mitochondrion (GO:0005739);; Cellular Component: cytosol (GO:0005829);; Biological Process: proline biosynthetic process (GO:0006561);; Biological Process: steroid metabolic process (GO:0008202);; Molecular Function: zinc ion binding (GO:0008270);; Biological Process: response to heat (GO:0009408);; Biological Process: resp…	--	Short-chain dehydrogenase reductase 2a OS=Arabidopsis thaliana GN=SDR2a PE=3 SV=1	PREDICTED: sex determination protein tasselseed-2 [Vitis vinifera]
gi_351597746_gb_JP452287.1	8.08e-12	-3.43509	down	--	--	Biological Process: nitrogen compound metabolic process (GO:0006807);; Molecular Function: O-acyltransferase activity (GO:0008374);; Biological Process: phenylpropanoid biosynthetic process (GO:0009699);; Biological Process: cellular component organization (GO:0016043);; Molecular Function: N-acyltransferase activity (GO:0016410);; Molecular Function: transferase activity, transferring acyl group…	--	Anthranilate N-benzoyltransferase protein 1 OS=Dianthus caryophyllus GN=HCBT1 PE=1 SV=1	PREDICTED: shikimate O-hydroxycinnamoyltransferase-like [Fragaria vesca subsp. vesca]
gi_351619787_gb_JP474088.1	1.03e-10	-3.38307	down	--	--	Biological Process: response to stress (GO:0006950);; Biological Process: metabolic process (GO:0008152);; Cellular Component: membrane (GO:0016020);; Biological Process: cellular component organization (GO:0016043);; Molecular Function: pectinesterase activity (GO:0030599);; Biological Process: negative regulation of catalytic activity (GO:0043086);; Cellular Component: intracellular membrane-bo…	--	21 kDa protein OS=Daucus carota PE=2 SV=1	hypothetical protein PRUPE_ppa011607mg [Prunus persica]
gi_351618652_gb_JP472953.1	3.39e-07	-3.35833	down	--	--	--	--	--	hypothetical protein VITISV_034460 [Vitis vinifera]
gi_351590924_gb_JP449381.1	9.17e-06	-3.35007	down	--	--	Molecular Function: carboxylesterase activity (GO:0004091);; Molecular Function: cholinesterase activity (GO:0004104);; Molecular Function: alpha-L-fucosidase activity (GO:0004560);; Cellular Component: extracellular region (GO:0005576);; Cellular Component: plant-type cell wall (GO:0009505);; Cellular Component: plasmodesma (GO:0009506);; Molecular Function: lipase activity (GO:0016298);; Biolog…	--	GDSL esterase/lipase At5g14450 OS=Arabidopsis thaliana GN=At5g14450 PE=2 SV=1	hypothetical protein PRUPE_ppa021457mg, partial [Prunus persica]
gi_351591275_gb_JP449724.1	4.1e-14	-3.34844	down	--	--	Molecular Function: structural constituent of cell wall (GO:0005199);; Cellular Component: extracellular region (GO:0005576);; Cellular Component: cytosol (GO:0005829);; Biological Process: syncytium formation (GO:0006949);; Cellular Component: plant-type cell wall (GO:0009505);; Cellular Component: plasmodesma (GO:0009506);; Cellular Component: chloroplast (GO:0009507);; Biological Process: plan…	--	Expansin-A8 OS=Arabidopsis thaliana GN=EXPA8 PE=2 SV=1	expansin 2 [Citrus sinensis]
gi_351608433_gb_JP462740.1	0.000521903	-3.31435	down	--	--	Molecular Function: protein binding (GO:0005515);; Cellular Component: extracellular region (GO:0005576);; Cellular Component: mitochondrion (GO:0005739);; Cellular Component: endosome (GO:0005768);; Cellular Component: Golgi apparatus (GO:0005794);; Cellular Component: trans-Golgi network (GO:0005802);; Biological Process: oligopeptide transport (GO:0006857);; Biological Process: lignin metaboli…	--	Glucuronoxylan 4-O-methyltransferase 1 OS=Arabidopsis thaliana GN=GXM1 PE=1 SV=1	predicted protein [Populus trichocarpa]
gi_351601888_gb_JP456325.1	0.00016441	-3.29983	down	[QR]	--	Molecular Function: sterol 24-C-methyltransferase activity (GO:0003838);; Cellular Component: mitochondrion (GO:0005739);; Cellular Component: vacuole (GO:0005773);; Cellular Component: endoplasmic reticulum (GO:0005783);; Cellular Component: cytosol (GO:0005829);; Cellular Component: plasma membrane (GO:0005886);; Biological Process: acetyl-CoA metabolic process (GO:0006084);; Biological Process…	K00559|1e-60|vvi:100263590|hypothetical protein LOC100263590	Cycloartenol-C-24-methyltransferase OS=Arabidopsis thaliana GN=SMT1 PE=2 SV=1	unknown [Lotus japonicus]
gi_351611558_gb_JP465859.1	1.88e-32	-3.21876	down	--	--	Cellular Component: extracellular region (GO:0005576);; Cellular Component: cell wall (GO:0005618);; Biological Process: syncytium formation (GO:0006949);; Cellular Component: plasmodesma (GO:0009506);; Biological Process: unidimensional cell growth (GO:0009826);; Biological Process: plant-type cell wall loosening (GO:0009828);; Cellular Component: membrane (GO:0016020);; Cellular Component: cyto…	--	Expansin-B17 OS=Oryza sativa subsp. japonica GN=EXPB17 PE=3 SV=2	Beta-expansin 3 precursor, putative [Ricinus communis]
gi_351599433_gb_JP453928.1	2.55e-09	-3.18163	down	--	--	--	--	Uncharacterized protein DDB_G0271670 OS=Dictyostelium discoideum GN=DDB_G0271670 PE=4 SV=1	Uncharacterized protein isoform 1 [Theobroma cacao]
gi_351606050_gb_JP460387.1	7.09e-43	-3.17203	down	--	--	Cellular Component: cell wall (GO:0005618);; Biological Process: catabolic process (GO:0009056);; Biological Process: cellular component organization (GO:0016043);; Biological Process: regulation of metabolic process (GO:0019222);; Molecular Function: pectinesterase activity (GO:0030599);; Biological Process: cellular response to stress (GO:0033554);; Biological Process: cell wall biogenesis (GO:…	--	Probable pectinesterase/pectinesterase inhibitor 35 OS=Arabidopsis thaliana GN=PME35 PE=2 SV=1	PREDICTED: probable pectinesterase/pectinesterase inhibitor 35-like [Fragaria vesca subsp. vesca]
gi_351613862_gb_JP468163.1	7.18e-05	-3.16945	down	--	--	--	--	--	PREDICTED: lysine-rich arabinogalactan protein 17 [Vitis vinifera]
gi_351617508_gb_JP471809.1	0.00164414	-3.16175	down	--	--	Cellular Component: plasma membrane (GO:0005886);;	--	Probable disease resistance RPP8-like protein 2 OS=Arabidopsis thaliana GN=RPP8L2 PE=2 SV=1	PREDICTED: putative disease resistance protein At1g50180-like [Fragaria vesca subsp. vesca]
gi_351599891_gb_JP454372.1	1.79e-36	-3.12253	down	--	--	Cellular Component: cell wall (GO:0005618);; Cellular Component: nucleus (GO:0005634);; Biological Process: L-fucose biosynthetic process (GO:0006005);; Biological Process: oligopeptide transport (GO:0006857);; Biological Process: response to cold (GO:0009409);; Cellular Component: plant-type cell wall (GO:0009505);; Biological Process: auxin mediated signaling pathway (GO:0009734);; Biological P…	--	Germin-like protein OS=Morus alba PE=1 SV=1	Germin-like protein [Pisum sativum]
gi_351615177_gb_JP469478.1	0.00355654	-3.09075	down	--	--	Biological Process: response to reactive oxygen species (GO:0000302);; Cellular Component: chromatin (GO:0000785);; Cellular Component: nucleus (GO:0005634);; Cellular Component: mitochondrion (GO:0005739);; Cellular Component: plasma membrane (GO:0005886);; Biological Process: DNA metabolic process (GO:0006259);; Biological Process: regulation of transcription, DNA-dependent (GO:0006355);; Biolo…	--	Heavy metal-associated isoprenylated plant protein 26 OS=Arabidopsis thaliana GN=HIPP26 PE=1 SV=1	copper ion binding protein, putative [Ricinus communis]
gi_351624214_gb_JP478515.1	1.56e-15	-3.08962	down	[RTKL]	--	Molecular Function: DNA binding (GO:0003677);; Molecular Function: protein serine/threonine kinase activity (GO:0004674);; Molecular Function: ATP binding (GO:0005524);; Cellular Component: nucleus (GO:0005634);; Cellular Component: vacuolar membrane (GO:0005774);; Cellular Component: plasma membrane (GO:0005886);; Biological Process: cellular glucan metabolic process (GO:0006073);; Biological Pr…	--	Probable leucine-rich repeat receptor-like protein kinase At1g68400 OS=Arabidopsis thaliana GN=At1g68400 PE=2 SV=1	hypothetical protein PRUPE_ppa002357mg [Prunus persica]
gi_351616200_gb_JP470501.1	1.27e-05	-3.07631	down	--	--	Molecular Function: monooxygenase activity (GO:0004497);; Molecular Function: protein binding (GO:0005515);; Cellular Component: chloroplast (GO:0009507);; Cellular Component: chloroplast ribulose bisphosphate carboxylase complex (GO:0009573);; Cellular Component: thylakoid (GO:0009579);; Biological Process: response to blue light (GO:0009637);; Biological Process: photorespiration (GO:0009853);;…	K01602|1e-100|rcu:RCOM_1158790|Ribulose bisphosphate carboxylase small chain, chloroplast precursor, putative (EC:4.1.1.39)	Ribulose bisphosphate carboxylase small chain, chloroplastic OS=Fagus crenata GN=RBCS1 PE=2 SV=1	chloroplast ribulose-1,5-bisphosphate carboxylase/oxygenase small subunit [Fagus sylvatica]
gi_351628680_gb_JP481563.1	8.92e-05	-3.07214	down	--	--	Biological Process: multicellular organismal development (GO:0007275);; Biological Process: regulation of hormone levels (GO:0010817);; Cellular Component: membrane (GO:0016020);; Biological Process: cellular component organization (GO:0016043);; Biological Process: cell growth (GO:0016049);; Biological Process: positive regulation of cellular metabolic process (GO:0031325);; Cellular Component: …	--	WAT1-related protein At1g70260 OS=Arabidopsis thaliana GN=At1g70260 PE=2 SV=1	PREDICTED: auxin-induced protein 5NG4-like [Fragaria vesca subsp. vesca]
gi_351604405_gb_JP458757.1	7.97e-14	-3.0215	down	--	--	--	--	--	PREDICTED: uncharacterized protein At2g29880-like [Vitis vinifera]
gi_351612265_gb_JP466566.1	3.36e-29	-3.01679	down	--	--	Biological Process: transition metal ion transport (GO:0000041);; Cellular Component: extracellular region (GO:0005576);; Cellular Component: nucleus (GO:0005634);; Cellular Component: cytoplasm (GO:0005737);; Biological Process: L-fucose biosynthetic process (GO:0006005);; Biological Process: cell communication (GO:0007154);; Biological Process: response to cold (GO:0009409);; Cellular Component…	--	Germin-like protein OS=Morus alba PE=1 SV=1	RecName: Full=Germin-like protein; Short=Ma-Glp; Flags: Precursor
gi_351605939_gb_JP460278.1	6.01e-05	-3.01408	down	--	--	Biological Process: defense response to nematode (GO:0002215);; Molecular Function: peroxidase activity (GO:0004601);; Molecular Function: protein binding (GO:0005515);; Cellular Component: extracellular region (GO:0005576);; Cellular Component: vacuolar membrane (GO:0005774);; Cellular Component: Golgi apparatus (GO:0005794);; Cellular Component: cytosol (GO:0005829);; Cellular Component: plasma…	K00430|0.0|rcu:RCOM_0504470|Peroxidase 53 precursor, putative (EC:1.11.1.7)	Peroxidase 53 OS=Arabidopsis thaliana GN=PER53 PE=1 SV=1	hypothetical protein PRUPE_ppa008390mg [Prunus persica]
gi_351619820_gb_JP474121.1	8.41e-09	-2.99647	down	--	--	Cellular Component: Golgi apparatus (GO:0005794);; Cellular Component: plant-type cell wall (GO:0009505);; Cellular Component: plasmodesma (GO:0009506);; Cellular Component: anchored to plasma membrane (GO:0046658);; Biological Process: system development (GO:0048731);; Biological Process: cellular component organization or biogenesis (GO:0071840);;	--	Fasciclin-like arabinogalactan protein 12 OS=Arabidopsis thaliana GN=FLA12 PE=2 SV=2	PREDICTED: fasciclin-like arabinogalactan protein 11-like [Fragaria vesca subsp. vesca]
gi_351598323_gb_JP452848.1	0.00115801	-2.98831	down	--	--	Cellular Component: extracellular region (GO:0005576);;	--	--	PREDICTED: galactose oxidase-like [Cucumis sativus]
gi_351624224_gb_JP478525.1	0.00643603	-2.98464	down	--	--	Molecular Function: nucleotide binding (GO:0000166);; Molecular Function: nucleic acid binding (GO:0003676);; Molecular Function: RNA binding (GO:0003723);; Cellular Component: cell part (GO:0044464);; Molecular Function: metal ion binding (GO:0046872);;	--	Zinc finger CCCH domain-containing protein 18 OS=Arabidopsis thaliana GN=At2g05160 PE=2 SV=1	CCCH-type zinc fingerfamily protein with RNA-binding domain, putative isoform 4, partial [Theobroma cacao]
gi_351609461_gb_JP463762.1	0.00894055	-2.98416	down	--	--	--	--	--	unknown [Populus trichocarpa]
gi_351615614_gb_JP469915.1	7.78e-05	-2.9835	down	--	--	Biological Process: instar larval development (GO:0002168);; Molecular Function: protein binding (GO:0005515);; Cellular Component: mitochondrial outer membrane (GO:0005741);; Cellular Component: mitochondrial inner membrane (GO:0005743);; Cellular Component: endoplasmic reticulum membrane (GO:0005789);; Cellular Component: lipid particle (GO:0005811);; Biological Process: tryptophan catabolic pr…	--	Cytochrome b5 isoform B OS=Arabidopsis thaliana GN=CYTB5-B PE=1 SV=1	Cytochrome B5, n4,ATCB5-B,CB5-B [Theobroma cacao]
gi_351597658_gb_JP452200.1	0.00346035	-2.97511	down	[IQR]	--	Cellular Component: cytosol (GO:0005829);; Cellular Component: plasma membrane (GO:0005886);; Biological Process: fatty acid metabolic process (GO:0006631);; Biological Process: defense response (GO:0006952);; Molecular Function: alcohol dehydrogenase (NADP+) activity (GO:0008106);; Cellular Component: plant-type cell wall (GO:0009505);; Biological Process: response to sucrose stimulus (GO:000974…	--	(+)-neomenthol dehydrogenase OS=Arabidopsis thaliana GN=SDR1 PE=1 SV=1	predicted protein [Populus trichocarpa]
gi_351608337_gb_JP462644.1	0.00570305	-2.93968	down	--	--	Biological Process: defense response to insect (GO:0002213);; Molecular Function: chitinase activity (GO:0004568);; Molecular Function: structural constituent of cell wall (GO:0005199);; Molecular Function: protein binding (GO:0005515);; Cellular Component: extracellular region (GO:0005576);; Cellular Component: nucleus (GO:0005634);; Cellular Component: plasma membrane (GO:0005886);; Biological …	--	Extensin OS=Daucus carota PE=2 SV=1	hydroxyproline-rich glycoprotein, partial [Glycine max]
gi_351627993_gb_JP480876.1	8.48e-06	-2.91787	down	--	--	Cellular Component: extracellular region (GO:0005576);; Cellular Component: mitochondrion (GO:0005739);; Cellular Component: Golgi apparatus (GO:0005794);; Cellular Component: cytosol (GO:0005829);; Cellular Component: plasma membrane (GO:0005886);; Biological Process: carbohydrate metabolic process (GO:0005975);; Molecular Function: cellulase activity (GO:0008810);; Cellular Component: plant-typ…	--	Endoglucanase 17 OS=Arabidopsis thaliana GN=At4g02290 PE=2 SV=1	Glycosyl hydrolase 9B13 [Theobroma cacao]
gi_351623829_gb_JP478130.1	2.12e-08	-2.90905	down	--	--	Biological Process: transition metal ion transport (GO:0000041);; Biological Process: defense response to nematode (GO:0002215);; Molecular Function: peroxidase activity (GO:0004601);; Molecular Function: protein binding (GO:0005515);; Cellular Component: cell wall (GO:0005618);; Cellular Component: vacuolar membrane (GO:0005774);; Cellular Component: Golgi apparatus (GO:0005794);; Cellular Compo…	K00430|0.0|pop:POPTR_719600|hypothetical protein	Peroxidase 72 OS=Arabidopsis thaliana GN=PER72 PE=1 SV=1	predicted protein [Populus trichocarpa]
gi_351599594_gb_JP454083.1	0.00370227	-2.89693	down	--	--	Molecular Function: protein binding (GO:0005515);;	--	Putative disease resistance RPP13-like protein 1 OS=Arabidopsis thaliana GN=RPPL1 PE=3 SV=1	Disease resistance protein R3a-like protein, partial [Medicago truncatula]
gi_351613353_gb_JP467654.1	0.000688294	-2.89579	down	--	--	--	--	--	unknown [Populus trichocarpa]
gi_351599962_gb_JP454441.1	0.00578294	-2.89533	down	--	--	Molecular Function: G-protein coupled receptor binding (GO:0001664);; Molecular Function: GTPase activity (GO:0003924);; Molecular Function: signal transducer activity (GO:0004871);; Molecular Function: GTP binding (GO:0005525);; Cellular Component: nucleus (GO:0005634);; Cellular Component: heterotrimeric G-protein complex (GO:0005834);; Biological Process: GTP catabolic process (GO:0006184);; B…	--	Guanine nucleotide-binding protein alpha-1 subunit OS=Oryza sativa subsp. japonica GN=GPA1 PE=1 SV=2	unnamed protein product [Vitis vinifera]
gi_351597513_gb_JP452058.1	0.00147938	-2.87689	down	--	--	Biological Process: cytokinesis (GO:0000910);; Biological Process: defense response to insect (GO:0002213);; Molecular Function: chitinase activity (GO:0004568);; Molecular Function: protein binding (GO:0005515);; Cellular Component: extracellular region (GO:0005576);; Cellular Component: cilium (GO:0005929);; Biological Process: glucose metabolic process (GO:0006006);; Biological Process: chitin…	--	Mulatexin OS=Morus alba PE=1 SV=2	predicted protein [Populus trichocarpa]
gi_351600763_gb_JP455224.1	1.28e-05	-2.84492	down	--	--	--	--	--	hypothetical protein PRUPE_ppa026566mg, partial [Prunus persica]
gi_351597329_gb_JP451877.1	0.000837263	-2.82589	down	--	--	--	--	--	hypothetical protein PRUPE_ppa025788mg [Prunus persica]
gi_351628825_gb_JP481708.1	8.59e-05	-2.81618	down	--	--	--	--	--	Uncharacterized protein TCM_028895 [Theobroma cacao]
gi_351615106_gb_JP469407.1	0.00105577	-2.81305	down	--	--	--	K00099|1e-06|pop:POPTR_728585|1-deoxy-D-xylulose-5-phosphate reductoisomerase (EC:1.1.1.267)	--	1-deoxy-D-xylulose-5-phosphate reductoisomerase [Rosa rugosa]
gi_351598184_gb_JP452713.1	0.00198195	-2.78364	down	--	--	--	--	--	PREDICTED: uncharacterized protein LOC101308578 [Fragaria vesca subsp. vesca]
gi_351597832_gb_JP452370.1	1.21e-17	-2.7309	down	--	--	Molecular Function: polygalacturonase activity (GO:0004650);; Molecular Function: protein binding (GO:0005515);; Cellular Component: extracellular region (GO:0005576);; Biological Process: carbohydrate metabolic process (GO:0005975);; Cellular Component: plant-type cell wall (GO:0009505);; Biological Process: anther dehiscence (GO:0009901);; Biological Process: fruit dehiscence (GO:0010047);; Bio…	--	Polygalacturonase At1g48100 OS=Arabidopsis thaliana GN=At1g48100 PE=2 SV=1	hypothetical protein PRUPE_ppa004002mg [Prunus persica]
gi_351627296_gb_JP480179.1	1.07e-09	-2.71829	down	--	--	Cellular Component: mitochondrion (GO:0005739);; Cellular Component: Golgi apparatus (GO:0005794);; Cellular Component: photosystem I (GO:0009522);; Cellular Component: photosystem II (GO:0009523);; Cellular Component: chloroplast thylakoid membrane (GO:0009535);; Biological Process: photosynthesis, light harvesting (GO:0009765);; Cellular Component: plastoglobule (GO:0010287);; Cellular Componen…	K08912|1e-178|vvi:100245214|hypothetical protein LOC100245214	Chlorophyll a-b binding protein, chloroplastic OS=Spinacia oleracea PE=1 SV=1	putative chloroplast chlorophyll a/b-binding protein [Carya cathayensis]
gi_351624947_gb_JP479248.1	1.23e-06	-2.70597	down	[RTKL]	--	Molecular Function: nucleotide binding (GO:0000166);; Molecular Function: protein kinase activity (GO:0004672);; Molecular Function: transmembrane receptor protein serine/threonine kinase activity (GO:0004675);; Molecular Function: protein binding (GO:0005515);; Cellular Component: plasma membrane (GO:0005886);; Biological Process: defense response (GO:0006952);; Biological Process: signal transd…	--	Probable receptor protein kinase TMK1 OS=Arabidopsis thaliana GN=TMK1 PE=1 SV=1	Leucine-rich repeat protein kinase family protein [Theobroma cacao]
gi_351612451_gb_JP466752.1	1.18e-30	-2.6976	down	--	--	Cellular Component: nucleus (GO:0005634);; Biological Process: L-fucose biosynthetic process (GO:0006005);; Biological Process: oligopeptide transport (GO:0006857);; Biological Process: response to cold (GO:0009409);; Cellular Component: plant-type cell wall (GO:0009505);; Biological Process: auxin mediated signaling pathway (GO:0009734);; Biological Process: stomatal complex morphogenesis (GO:00…	--	Germin-like protein OS=Morus alba PE=1 SV=1	PREDICTED: auxin-binding protein ABP19a-like [Solanum lycopersicum]
gi_351591260_gb_JP449709.1	7.48e-08	-2.68529	down	[QR]	--	Cellular Component: cytoplasm (GO:0005737);; Molecular Function: O-methyltransferase activity (GO:0008171);; Biological Process: isoflavonoid phytoalexin biosynthetic process (GO:0009701);; Biological Process: flavonoid metabolic process (GO:0009812);; Biological Process: alkaloid biosynthetic process (GO:0009821);; Molecular Function: isoflavone 4'-O-methyltransferase activity (GO:0030746);; Mol…	--	(RS)-norcoclaurine 6-O-methyltransferase OS=Coptis japonica PE=1 SV=1	hypothetical protein PRUPE_ppa021776mg [Prunus persica]
gi_351612840_gb_JP467141.1	0.00243664	-2.67888	down	[CHR]	--	Molecular Function: nucleotide binding (GO:0000166);; Cellular Component: cytosol (GO:0005829);; Biological Process: oxidative photosynthetic carbon pathway (GO:0009854);; Molecular Function: hydroxypyruvate reductase activity (GO:0016618);; Molecular Function: glyoxylate reductase (NADP) activity (GO:0030267);; Molecular Function: glyoxylate reductase activity (GO:0047964);; Molecular Function: …	--	Glyoxylate/hydroxypyruvate reductase HPR3 OS=Arabidopsis thaliana GN=HPR3 PE=2 SV=1	PREDICTED: glyoxylate reductase [Vitis vinifera]
gi_351597440_gb_JP451986.1	0.00437228	-2.65969	down	--	--	Cellular Component: nucleus (GO:0005634);;	--	--	hypothetical protein PRUPE_ppa000279mg [Prunus persica]
gi_351613645_gb_JP467946.1	2.5e-05	-2.65898	down	--	--	--	--	--	hypothetical protein PRUPE_ppa014138mg [Prunus persica]
gi_351598026_gb_JP452560.1	0.000220363	-2.65478	down	--	--	Molecular Function: protein binding (GO:0005515);; Biological Process: systemic acquired resistance (GO:0009627);; Biological Process: salicylic acid biosynthetic process (GO:0009697);; Cellular Component: cell part (GO:0044464);;	--	Putative disease resistance RPP13-like protein 1 OS=Arabidopsis thaliana GN=RPPL1 PE=3 SV=1	hypothetical protein PRUPE_ppa015043mg [Prunus persica]
gi_351625674_gb_JP479975.1	0.00594076	-2.64843	down	--	--	Molecular Function: phosphatidylinositol-4,5-bisphosphate 5-phosphatase activity (GO:0004439);; Molecular Function: inositol-polyphosphate 5-phosphatase activity (GO:0004445);; Molecular Function: protein binding (GO:0005515);; Cellular Component: early endosome (GO:0005769);; Cellular Component: Golgi apparatus (GO:0005794);; Cellular Component: cytosol (GO:0005829);; Cellular Component: cilium …	--	Type I inositol 1,4,5-trisphosphate 5-phosphatase CVP2 OS=Arabidopsis thaliana GN=CVP2 PE=1 SV=2	PREDICTED: type I inositol 1,4,5-trisphosphate 5-phosphatase CVP2-like [Fragaria vesca subsp. vesca]
gi_351599535_gb_JP454027.1	3.91e-20	-2.63889	down	--	--	Biological Process: cellular protein modification process (GO:0006464);; Biological Process: organelle organization (GO:0006996);; Biological Process: multicellular organismal development (GO:0007275);;	--	WEB family protein At2g40480 OS=Arabidopsis thaliana GN=At2g40480 PE=2 SV=1	unknown [Populus trichocarpa]
gi_351599892_gb_JP454373.1	0.00018986	-2.63757	down	--	--	--	--	Uncharacterized protein At4g15970 OS=Arabidopsis thaliana GN=At4g15970 PE=2 SV=1	PREDICTED: uncharacterized protein At4g15970-like [Fragaria vesca subsp. vesca]
gi_351627543_gb_JP480426.1	0.00285243	-2.63507	down	[RTKL]	--	Biological Process: MAPK cascade (GO:0000165);; Molecular Function: calmodulin-dependent protein kinase activity (GO:0004683);; Molecular Function: calcium-dependent protein kinase C activity (GO:0004698);; Molecular Function: calcium ion binding (GO:0005509);; Molecular Function: protein binding (GO:0005515);; Molecular Function: ATP binding (GO:0005524);; Cellular Component: nucleus (GO:0005634…	K13412|0.0|vvi:100250838|hypothetical protein LOC100250838	Calcium-dependent protein kinase 24 OS=Arabidopsis thaliana GN=CPK24 PE=2 SV=1	unnamed protein product [Vitis vinifera]
gi_351605728_gb_JP460071.1	0.000388061	-2.62532	down	[IQ]	--	Molecular Function: fatty-acyl-CoA synthase activity (GO:0004321);; Cellular Component: peroxisome (GO:0005777);; Biological Process: autophagy (GO:0006914);; Biological Process: defense response (GO:0006952);; Biological Process: response to UV (GO:0009411);; Cellular Component: chloroplast (GO:0009507);; Biological Process: response to symbiotic fungus (GO:0009610);; Biological Process: respons…	--	4-coumarate--CoA ligase-like 6 OS=Arabidopsis thaliana GN=4CLL6 PE=2 SV=2	PREDICTED: 4-coumarate--CoA ligase-like 6-like [Fragaria vesca subsp. vesca]
gi_351606881_gb_JP461206.1	0.000103952	-2.62374	down	--	--	Molecular Function: GDP-fucose transmembrane transporter activity (GO:0005457);; Molecular Function: UDP-galactose transmembrane transporter activity (GO:0005459);; Molecular Function: UDP-glucose transmembrane transporter activity (GO:0005460);; Cellular Component: endosome (GO:0005768);; Cellular Component: Golgi apparatus (GO:0005794);; Cellular Component: trans-Golgi network (GO:0005802);; Ce…	--	UDP-galactose transporter 2 OS=Arabidopsis thaliana GN=UDP-GALT2 PE=2 SV=1	hypothetical protein PRUPE_ppa008188mg [Prunus persica]
gi_351591074_gb_JP449530.1	0.000106636	-2.61822	down	--	--	Molecular Function: protein phosphatase inhibitor activity (GO:0004864);; Molecular Function: receptor activity (GO:0004872);; Molecular Function: protein binding (GO:0005515);; Cellular Component: nucleus (GO:0005634);; Cellular Component: mitochondrion (GO:0005739);; Biological Process: tryptophan catabolic process (GO:0006569);; Biological Process: fatty acid catabolic process (GO:0009062);; C…	K14496|1e-100|pop:POPTR_907261|hypothetical protein	Abscisic acid receptor PYL4 OS=Arabidopsis thaliana GN=PYL4 PE=1 SV=1	PREDICTED: abscisic acid receptor PYL4-like [Fragaria vesca subsp. vesca]
gi_351603189_gb_JP457548.1	0.00916303	-2.61234	down	--	--	Molecular Function: enzyme inhibitor activity (GO:0004857);; Cellular Component: cell wall (GO:0005618);; Biological Process: protein targeting to membrane (GO:0006612);; Biological Process: water transport (GO:0006833);; Biological Process: response to salt stress (GO:0009651);; Biological Process: response to fructose stimulus (GO:0009750);; Biological Process: positive regulation of flavonoid …	--	Probable pectinesterase/pectinesterase inhibitor 61 OS=Arabidopsis thaliana GN=PME61 PE=1 SV=1	PREDICTED: probable pectinesterase/pectinesterase inhibitor 34-like [Cucumis sativus]
gi_351623036_gb_JP477337.1	0.000982696	-2.61113	down	--	--	Cellular Component: extracellular region (GO:0005576);; Cellular Component: mitochondrion (GO:0005739);; Cellular Component: Golgi apparatus (GO:0005794);; Cellular Component: cytosol (GO:0005829);; Cellular Component: plasma membrane (GO:0005886);; Biological Process: carbohydrate metabolic process (GO:0005975);; Molecular Function: cellulase activity (GO:0008810);; Cellular Component: plant-typ…	--	Endoglucanase 17 OS=Arabidopsis thaliana GN=At4g02290 PE=2 SV=1	Glycosyl hydrolase 9B13 [Theobroma cacao]
gi_351623830_gb_JP478131.1	0.00379683	-2.58367	down	--	--	Biological Process: chromosome segregation (GO:0007059);; Biological Process: meiosis I (GO:0007127);; Biological Process: leaf morphogenesis (GO:0009965);; Biological Process: mRNA modification (GO:0016556);; Biological Process: cell differentiation (GO:0030154);; Cellular Component: intracellular membrane-bounded organelle (GO:0043231);; Cellular Component: cytoplasmic part (GO:0044444);; Biolo…	--	Pentatricopeptide repeat-containing protein At5g55740, chloroplastic OS=Arabidopsis thaliana GN=CRR21 PE=2 SV=1	PREDICTED: pentatricopeptide repeat-containing protein At5g55740, chloroplastic-like [Fragaria vesca subsp. vesca]
gi_351609202_gb_JP463503.1	0.00513155	-2.58363	down	--	--	--	--	--	predicted protein [Populus trichocarpa]
gi_351602486_gb_JP456909.1	0.00283056	-2.57727	down	--	--	--	--	--	PREDICTED: uncharacterized protein LOC101229172 [Cucumis sativus]
gi_351611624_gb_JP465925.1	4.02e-16	-2.56817	down	--	--	Biological Process: polysaccharide biosynthetic process (GO:0000271);; Cellular Component: extracellular region (GO:0005576);; Cellular Component: cell wall (GO:0005618);; Biological Process: cellular glucan metabolic process (GO:0006073);; Biological Process: pattern specification process (GO:0007389);; Biological Process: regulation of cell size (GO:0008361);; Cellular Component: plant-type cel…	K08235|1e-178|pop:POPTR_718004|hypothetical protein	Probable xyloglucan endotransglucosylase/hydrolase protein 6 OS=Arabidopsis thaliana GN=XTH6 PE=2 SV=2	xyloglucan endotransglucosylase/hydrolase [Gossypium hirsutum]
gi_351599627_gb_JP454116.1	1.89e-06	-2.5555	down	--	--	Molecular Function: O-acyltransferase activity (GO:0008374);; Biological Process: anatomical structure morphogenesis (GO:0009653);; Biological Process: flavonoid biosynthetic process (GO:0009813);; Biological Process: cellular component organization (GO:0016043);; Molecular Function: N-acyltransferase activity (GO:0016410);; Molecular Function: transferase activity (GO:0016740);; Biological Proce…	--	Vinorine synthase OS=Rauvolfia serpentina GN=ACT PE=1 SV=2	PREDICTED: vinorine synthase-like [Glycine max]
gi_351596543_gb_JP451099.1	2.46e-10	-2.55537	down	--	--	Molecular Function: protein binding (GO:0005515);; Biological Process: defense response (GO:0006952);; Cellular Component: cell part (GO:0044464);;	--	Putative disease resistance protein RGA3 OS=Solanum bulbocastanum GN=RGA3 PE=2 SV=2	putative CC-NBS-LRR resistance protein [Malus domestica]
gi_351625354_gb_JP479655.1	0.000695109	-2.54607	down	--	--	Molecular Function: hydrolase activity, hydrolyzing O-glycosyl compounds (GO:0004553);; Biological Process: sucrose biosynthetic process (GO:0005986);; Biological Process: response to oxidative stress (GO:0006979);; Biological Process: metabolic process (GO:0008152);; Biological Process: response to water deprivation (GO:0009414);; Cellular Component: chloroplast (GO:0009507);; Biological Process…	--	Probable galactinol--sucrose galactosyltransferase 2 OS=Arabidopsis thaliana GN=RFS2 PE=2 SV=2	PREDICTED: probable galactinol--sucrose galactosyltransferase 2-like [Fragaria vesca subsp. vesca]
gi_351600171_gb_JP454644.1	0.000147918	-2.50788	down	[RTKL]	--	Biological Process: protein peptidyl-prolyl isomerization (GO:0000413);; Molecular Function: peptidyl-prolyl cis-trans isomerase activity (GO:0003755);; Molecular Function: guanylate cyclase activity (GO:0004383);; Molecular Function: protein serine/threonine kinase activity (GO:0004674);; Molecular Function: non-membrane spanning protein tyrosine kinase activity (GO:0004715);; Molecular Function…	--	Wall-associated receptor kinase-like 20 OS=Arabidopsis thaliana GN=WAKL20 PE=2 SV=1	Kinase family protein [Theobroma cacao]
gi_351608791_gb_JP463095.1	0.00192467	-2.49959	down	--	--	--	--	--	hypothetical protein PRUPE_ppa023982mg [Prunus persica]
gi_351616965_gb_JP471266.1	0.00104808	-2.49437	down	--	--	--	--	--	conserved hypothetical protein [Ricinus communis]
gi_351597867_gb_JP452404.1	1.03e-09	-2.49274	down	--	--	--	--	--	hypothetical protein PRUPE_ppa014688mg [Prunus persica]
gi_351616700_gb_JP471001.1	6.19e-08	-2.48875	down	--	--	Cellular Component: vacuolar membrane (GO:0005774);; Cellular Component: plasma membrane (GO:0005886);; Biological Process: protein targeting to membrane (GO:0006612);; Biological Process: response to desiccation (GO:0009269);; Biological Process: response to cold (GO:0009409);; Cellular Component: chloroplast thylakoid membrane (GO:0009535);; Cellular Component: chloroplast stroma (GO:0009570);;…	--	Allene oxide cyclase 4, chloroplastic OS=Arabidopsis thaliana GN=AOC4 PE=2 SV=1	PREDICTED: allene oxide cyclase 4, chloroplastic-like [Fragaria vesca subsp. vesca]
gi_351602179_gb_JP456610.1	0.00223671	-2.48128	down	--	--	Cellular Component: intracellular part (GO:0044424);; Biological Process: pollen sperm cell differentiation (GO:0048235);;	--	--	hypothetical protein PRUPE_ppa017381mg, partial [Prunus persica]
gi_351596633_gb_JP451189.1	1.11e-10	-2.47231	down	--	--	Molecular Function: nucleic acid binding (GO:0003676);; Molecular Function: protein binding (GO:0005515);; Cellular Component: chromosome (GO:0005694);; Biological Process: regulation of transcription from RNA polymerase II promoter (GO:0006357);; Biological Process: cellular protein modification process (GO:0006464);; Biological Process: phosphate-containing compound metabolic process (GO:000679…	--	Uncharacterized RNA-binding protein C17H9.04c OS=Schizosaccharomyces pombe (strain 972 / ATCC 24843) GN=SPAC17H9.04c PE=1 SV=1	hypothetical protein PRUPE_ppa012687mg [Prunus persica]
gi_351620456_gb_JP474757.1	0.00490268	-2.45128	down	--	--	Cellular Component: chloroplast (GO:0009507);;	--	--	predicted protein [Populus trichocarpa]
gi_351619910_gb_JP474211.1	0.000825307	-2.44879	down	--	--	Molecular Function: sequence-specific DNA binding transcription factor activity (GO:0003700);; Molecular Function: protein binding (GO:0005515);; Cellular Component: nucleus (GO:0005634);; Biological Process: chromatin assembly or disassembly (GO:0006333);; Biological Process: regulation of transcription, DNA-dependent (GO:0006355);; Biological Process: response to abscisic acid stimulus (GO:0009…	--	Protein YABBY 4 OS=Oryza sativa subsp. japonica GN=YAB4 PE=2 SV=1	hypothetical protein PRUPE_ppa011209mg [Prunus persica]
gi_351616244_gb_JP470545.1	0.000800265	-2.44477	down	--	--	Biological Process: response to reactive oxygen species (GO:0000302);; Cellular Component: chromatin (GO:0000785);; Molecular Function: protein binding (GO:0005515);; Cellular Component: nucleus (GO:0005634);; Cellular Component: cytoplasm (GO:0005737);; Cellular Component: mitochondrion (GO:0005739);; Cellular Component: plasma membrane (GO:0005886);; Biological Process: DNA metabolic process (G…	--	Heavy metal-associated isoprenylated plant protein 26 OS=Arabidopsis thaliana GN=HIPP26 PE=1 SV=1	PREDICTED: heavy metal-associated isoprenylated plant protein 26-like [Fragaria vesca subsp. vesca]
gi_351621809_gb_JP476110.1	3.51e-14	-2.43191	down	--	--	Molecular Function: binding (GO:0005488);;	--	Putative disease resistance protein RGA3 OS=Solanum bulbocastanum GN=RGA3 PE=2 SV=2	putative CC-NBS-LRR resistance protein [Malus domestica]
gi_351597830_gb_JP452368.1	8.21e-08	-2.42081	down	--	--	Molecular Function: protein binding (GO:0005515);; Cellular Component: extracellular region (GO:0005576);; Cellular Component: cytoplasm (GO:0005737);; Cellular Component: mitochondrion (GO:0005739);; Cellular Component: plasma membrane (GO:0005886);; Cellular Component: cell cortex (GO:0005938);; Biological Process: Golgi to vacuole transport (GO:0006896);; Biological Process: response to abioti…	--	WAT1-related protein At2g37460 OS=Arabidopsis thaliana GN=At2g37460 PE=2 SV=1	hypothetical protein PRUPE_ppa007333mg [Prunus persica]
gi_351601008_gb_JP455464.1	0.00846308	-2.4094	down	--	--	--	--	--	PREDICTED: uncharacterized protein LOC100244799 [Vitis vinifera]
gi_351616472_gb_JP470773.1	4.92e-05	-2.40071	down	--	--	Molecular Function: monooxygenase activity (GO:0004497);; Molecular Function: iron ion binding (GO:0005506);; Cellular Component: mitochondrion (GO:0005739);; Cellular Component: endoplasmic reticulum (GO:0005783);; Cellular Component: Golgi apparatus (GO:0005794);; Cellular Component: plasma membrane (GO:0005886);; Molecular Function: electron carrier activity (GO:0009055);; Molecular Function: …	--	Cytochrome P450 71A1 OS=Persea americana GN=CYP71A1 PE=1 SV=2	hypothetical protein PRUPE_ppa017688mg [Prunus persica]
gi_351596928_gb_JP451481.1	0.0022632	-2.39037	down	--	--	Molecular Function: binding (GO:0005488);;	--	Disease resistance protein RGA2 OS=Solanum bulbocastanum GN=RGA2 PE=1 SV=1	DHHC-type zinc finger family protein [Theobroma cacao]
gi_351619546_gb_JP473847.1	0.00304877	-2.36885	down	--	--	Biological Process: auxin mediated signaling pathway (GO:0009734);; Biological Process: response to red light (GO:0010114);; Biological Process: response to far red light (GO:0010218);;	K14488|4e-37|pop:POPTR_800822|SAUR73	Auxin-induced protein X15 OS=Glycine max PE=2 SV=1	hypothetical protein PRUPE_ppa015749mg [Prunus persica]
gi_351615107_gb_JP469408.1	1.89e-18	-2.34968	down	--	--	Molecular Function: copper ion binding (GO:0005507);; Biological Process: glucose catabolic process (GO:0006007);; Biological Process: response to osmotic stress (GO:0006970);; Biological Process: response to cadmium ion (GO:0046686);;	--	Metallothionein-like protein type 2 OS=Actinidia deliciosa GN=pKIWI504 PE=2 SV=1	predicted protein [Populus trichocarpa]
gi_351616097_gb_JP470398.1	0.00170245	-2.34814	down	--	--	Biological Process: very long-chain fatty acid metabolic process (GO:0000038);; Cellular Component: extracellular region (GO:0005576);; Biological Process: lipid transport (GO:0006869);; Molecular Function: lipid binding (GO:0008289);; Cellular Component: chloroplast thylakoid membrane (GO:0009535);; Cellular Component: membrane (GO:0016020);; Biological Process: cuticle development (GO:0042335);;	--	14 kDa proline-rich protein DC2.15 OS=Daucus carota PE=2 SV=1	hypothetical protein M569_00868, partial [Genlisea aurea]
gi_351596667_gb_JP451222.1	4.47e-09	-2.33369	down	--	--	Molecular Function: carboxylesterase activity (GO:0004091);; Cellular Component: extracellular region (GO:0005576);; Biological Process: lipid metabolic process (GO:0006629);; Biological Process: root morphogenesis (GO:0010015);; Biological Process: regulation of hormone levels (GO:0010817);; Biological Process: cell growth (GO:0016049);; Biological Process: cellular metabolic process (GO:0044237…	--	GDSL esterase/lipase At2g04570 OS=Arabidopsis thaliana GN=At2g04570 PE=2 SV=1	hypothetical protein PRUPE_ppa007991mg [Prunus persica]
gi_351603110_gb_JP457470.1	0.00129618	-2.32863	down	--	--	Cellular Component: nucleus (GO:0005634);; Biological Process: xylem development (GO:0010089);; Biological Process: cell wall macromolecule metabolic process (GO:0044036);;	--	Protein Brevis radix-like 4 OS=Arabidopsis thaliana GN=BRXL4 PE=2 SV=1	hypothetical protein PRUPE_ppa007278mg [Prunus persica]
gi_351591331_gb_JP449779.1	3.72e-05	-2.32805	down	--	--	Molecular Function: two-component response regulator activity (GO:0000156);; Molecular Function: DNA binding (GO:0003677);; Molecular Function: sequence-specific DNA binding transcription factor activity (GO:0003700);; Molecular Function: binding (GO:0005488);; Molecular Function: protein binding (GO:0005515);; Cellular Component: nucleus (GO:0005634);; Biological Process: rRNA processing (GO:000…	--	Protein PHR1-LIKE 1 OS=Arabidopsis thaliana GN=PHL1 PE=1 SV=1	hypothetical protein PRUPE_ppa005159mg [Prunus persica]
gi_351618635_gb_JP472936.1	6.37e-05	-2.32472	down	--	--	Biological Process: MAPK cascade (GO:0000165);; Biological Process: respiratory burst involved in defense response (GO:0002679);; Cellular Component: extracellular region (GO:0005576);; Cellular Component: cell wall (GO:0005618);; Cellular Component: vacuole (GO:0005773);; Biological Process: protein targeting to membrane (GO:0006612);; Biological Process: cellular membrane fusion (GO:0006944);; …	--	Pathogenesis-related protein 5 OS=Arabidopsis thaliana GN=At1g75040 PE=1 SV=1	Pathogenesis-related thaumatin superfamily protein isoform 2 [Theobroma cacao]
gi_351605615_gb_JP459959.1	6.51e-15	-2.31894	down	--	--	Biological Process: organelle organization (GO:0006996);; Biological Process: multicellular organismal development (GO:0007275);; Cellular Component: cell part (GO:0044464);; Biological Process: anatomical structure development (GO:0048856);; Biological Process: regulation of biological process (GO:0050789);; Biological Process: protein modification by small protein conjugation or removal (GO:007…	--	WEB family protein At2g40480 OS=Arabidopsis thaliana GN=At2g40480 PE=2 SV=1	PREDICTED: WEB family protein At2g40480-like [Fragaria vesca subsp. vesca]
gi_351611524_gb_JP465825.1	4.54e-20	-2.31691	down	--	--	Molecular Function: structural constituent of cell wall (GO:0005199);; Cellular Component: extracellular region (GO:0005576);; Cellular Component: cytosol (GO:0005829);; Biological Process: syncytium formation (GO:0006949);; Cellular Component: plant-type cell wall (GO:0009505);; Cellular Component: plasmodesma (GO:0009506);; Cellular Component: chloroplast (GO:0009507);; Biological Process: plan…	--	Expansin-A6 OS=Arabidopsis thaliana GN=EXPA6 PE=2 SV=2	PREDICTED: expansin-A4-like [Glycine max]
gi_351625747_gb_JP480048.1	5.13e-07	-2.29323	down	--	--	Molecular Function: nucleotide binding (GO:0000166);; Molecular Function: hydrolase activity (GO:0016787);;	--	Disease resistance RPP13-like protein 4 OS=Arabidopsis thaliana GN=RPP13L4 PE=2 SV=2	hypothetical protein PRUPE_ppa001384mg [Prunus persica]
gi_351591582_gb_JP450028.1	0.000712664	-2.28386	down	[KL]	--	Biological Process: negative regulation of transcription from RNA polymerase II promoter (GO:0000122);; Molecular Function: RNA polymerase II regulatory region sequence-specific DNA binding (GO:0000977);; Molecular Function: RNA polymerase II repressing transcription factor binding (GO:0001103);; Biological Process: blood vessel development (GO:0001568);; Molecular Function: DNA binding (GO:00036…	K11367|0.0|vvi:100261898|hypothetical protein LOC100261898	Chromodomain-helicase-DNA-binding protein 1 OS=Mus musculus GN=Chd1 PE=1 SV=3	hypothetical protein PRUPE_ppa000116mg [Prunus persica]
gi_351597485_gb_JP452030.1	8.66e-08	-2.27723	down	--	--	Molecular Function: protein binding (GO:0005515);; Cellular Component: thylakoid (GO:0009579);; Biological Process: sterol catabolic process (GO:0016127);; Molecular Function: transferase activity (GO:0016740);; Biological Process: sterol esterification (GO:0034434);; Cellular Component: intracellular membrane-bounded organelle (GO:0043231);; Cellular Component: cytoplasmic part (GO:0044444);;	--	Long-chain-alcohol O-fatty-acyltransferase OS=Simmondsia chinensis PE=1 SV=1	hypothetical protein PRUPE_ppa019416mg [Prunus persica]
gi_351612489_gb_JP466790.1	1.41e-05	-2.25956	down	--	--	Molecular Function: actin binding (GO:0003779);; Molecular Function: actin monomer binding (GO:0003785);; Molecular Function: glutamate 5-kinase activity (GO:0004349);; Molecular Function: glutamate-5-semialdehyde dehydrogenase activity (GO:0004350);; Cellular Component: nucleus (GO:0005634);; Cellular Component: cytoplasm (GO:0005737);; Cellular Component: cytoskeleton (GO:0005856);; Biological …	--	Profilin OS=Mercurialis annua PE=1 SV=1	Profilin 5 [Theobroma cacao]
gi_351617657_gb_JP471958.1	5.41e-07	-2.24223	down	--	--	Cellular Component: extracellular region (GO:0005576);; Cellular Component: mitochondrion (GO:0005739);; Cellular Component: Golgi apparatus (GO:0005794);; Cellular Component: cytosol (GO:0005829);; Cellular Component: plasma membrane (GO:0005886);; Biological Process: carbohydrate metabolic process (GO:0005975);; Molecular Function: cellulase activity (GO:0008810);; Cellular Component: plant-typ…	--	Endoglucanase 8 OS=Arabidopsis thaliana GN=CEL1 PE=2 SV=1	hypothetical protein PRUPE_ppa004644mg [Prunus persica]
gi_351606020_gb_JP460357.1	1.07e-05	-2.22877	down	--	--	Biological Process: polysaccharide catabolic process (GO:0000272);; Molecular Function: hydrolase activity, hydrolyzing O-glycosyl compounds (GO:0004553);; Molecular Function: chitinase activity (GO:0004568);; Cellular Component: extracellular space (GO:0005615);; Biological Process: carbohydrate metabolic process (GO:0005975);; Biological Process: chitin catabolic process (GO:0006032);; Cellular…	--	Acidic endochitinase OS=Cucumis sativus PE=1 SV=1	predicted protein [Populus trichocarpa]
gi_351606012_gb_JP460349.1	8.81e-10	-2.22581	down	[GER]	--	Molecular Function: protein binding (GO:0005515);; Cellular Component: plasma membrane (GO:0005886);; Cellular Component: cell cortex (GO:0005938);; Biological Process: Golgi to vacuole transport (GO:0006896);; Biological Process: macromolecule biosynthetic process (GO:0009059);; Cellular Component: chloroplast (GO:0009507);; Biological Process: response to abiotic stimulus (GO:0009628);; Cellula…	--	WAT1-related protein At1g43650 OS=Arabidopsis thaliana GN=At1g43650 PE=2 SV=1	hypothetical protein PRUPE_ppa008158mg [Prunus persica]
gi_351613522_gb_JP467823.1	0.00235223	-2.22395	down	--	--	--	--	--	hypothetical protein PRUPE_ppa012838mg [Prunus persica]
gi_351590850_gb_JP449308.1	0.000640604	-2.21273	down	--	--	Molecular Function: hydrolase activity (GO:0016787);;	--	--	PREDICTED: uncharacterized protein LOC100263058 [Vitis vinifera]
gi_351623593_gb_JP477894.1	4.96e-05	-2.21	down	--	--	Cellular Component: chloroplast (GO:0009507);;	--	--	hypothetical protein PRUPE_ppa007990mg [Prunus persica]
gi_351622804_gb_JP477105.1	0.00229162	-2.20632	down	--	--	Molecular Function: calmodulin binding (GO:0005516);; Cellular Component: Golgi apparatus (GO:0005794);; Cellular Component: plasma membrane (GO:0005886);; Biological Process: defense response (GO:0006952);; Biological Process: signal transduction (GO:0007165);; Biological Process: cell death (GO:0008219);; Cellular Component: plasmodesma (GO:0009506);; Biological Process: response to biotic stim…	--	MLO-like protein 4 OS=Arabidopsis thaliana GN=MLO4 PE=2 SV=2	hypothetical protein PRUPE_ppa020172mg [Prunus persica]
gi_351621510_gb_JP475811.1	7.21e-10	-2.18916	down	--	--	Biological Process: metabolic process (GO:0008152);; Molecular Function: raffinose alpha-galactosidase activity (GO:0052692);;	--	--	Trichome birefringence-like 37 isoform 1 [Theobroma cacao]
gi_351618674_gb_JP472975.1	0.00115143	-2.18628	down	--	--	Molecular Function: binding (GO:0005488);; Cellular Component: nucleus (GO:0005634);; Cellular Component: chloroplast (GO:0009507);; Biological Process: histone acetylation (GO:0016573);; Molecular Function: transferase activity (GO:0016740);; Biological Process: nucleic acid metabolic process (GO:0090304);;	--	--	Uncharacterized protein isoform 2 [Theobroma cacao]
gi_351618702_gb_JP473003.1	0.001583	-2.18612	down	--	--	Molecular Function: protein binding (GO:0005515);; Cellular Component: extracellular region (GO:0005576);; Cellular Component: mitochondrion (GO:0005739);; Cellular Component: endosome (GO:0005768);; Cellular Component: Golgi apparatus (GO:0005794);; Cellular Component: trans-Golgi network (GO:0005802);; Biological Process: oligopeptide transport (GO:0006857);; Biological Process: lignin metaboli…	--	Glucuronoxylan 4-O-methyltransferase 2 OS=Arabidopsis thaliana GN=GXM2 PE=1 SV=1	conserved hypothetical protein [Ricinus communis]
gi_351603435_gb_JP457793.1	4.5e-06	-2.17897	down	--	--	Biological Process: cell adhesion (GO:0007155);; Biological Process: trichome morphogenesis (GO:0010090);; Cellular Component: membrane (GO:0016020);; Cellular Component: mediator complex (GO:0016592);; Biological Process: actin nucleation (GO:0045010);; Biological Process: root hair cell differentiation (GO:0048765);; Biological Process: cell wall organization (GO:0071555);; Biological Process: …	--	Mediator of RNA polymerase II transcription subunit 33A OS=Arabidopsis thaliana GN=MED33A PE=1 SV=1	hypothetical protein PRUPE_ppa000298mg [Prunus persica]
gi_351598397_gb_JP452921.1	0.00326017	-2.17218	down	--	--	Cellular Component: plasma membrane (GO:0005886);; Cellular Component: plasmodesma (GO:0009506);; Biological Process: cellular process (GO:0009987);; Molecular Function: kinase activity (GO:0016301);; Biological Process: phosphorylation (GO:0016310);; Biological Process: defense response to bacterium (GO:0042742);;	--	Cysteine-rich repeat secretory protein 15 OS=Arabidopsis thaliana GN=CRRSP15 PE=2 SV=1	kinase, putative [Ricinus communis]
gi_351628554_gb_JP481437.1	1.07e-11	-2.16637	down	--	--	Molecular Function: aspartic-type endopeptidase activity (GO:0004190);; Biological Process: proteolysis (GO:0006508);; Biological Process: defense response (GO:0006952);; Molecular Function: peptidase activity (GO:0008233);; Cellular Component: plant-type cell wall (GO:0009505);; Cellular Component: chloroplast (GO:0009507);; Biological Process: response to endogenous stimulus (GO:0009719);; Biol…	--	Protein ASPARTIC PROTEASE IN GUARD CELL 2 OS=Arabidopsis thaliana GN=ASPG2 PE=2 SV=1	hypothetical protein PRUPE_ppa005966mg [Prunus persica]
gi_351619147_gb_JP473448.1	1.53e-07	-2.16495	down	--	--	Molecular Function: structural molecule activity (GO:0005198);; Cellular Component: chloroplast (GO:0009507);;	--	Probable plastid-lipid-associated protein 11, chloroplastic OS=Arabidopsis thaliana GN=PAP11 PE=2 SV=1	PREDICTED: uncharacterized protein LOC100855364, partial [Vitis vinifera]
gi_351598868_gb_JP453376.1	0.000408404	-2.16437	down	--	--	Biological Process: defense response to nematode (GO:0002215);; Molecular Function: peroxidase activity (GO:0004601);; Cellular Component: extracellular region (GO:0005576);; Cellular Component: cell wall (GO:0005618);; Cellular Component: vacuolar membrane (GO:0005774);; Cellular Component: Golgi apparatus (GO:0005794);; Cellular Component: cytosol (GO:0005829);; Biological Process: defense resp…	--	Peroxidase 15 OS=Ipomoea batatas GN=pod PE=1 SV=1	peroxidase (EC 1.11.1.7) A3a precursor - Japanese aspen x large-toothed aspen
gi_351619353_gb_JP473654.1	0.00338265	-2.15593	down	--	--	--	--	--	Uncharacterized protein TCM_037632 [Theobroma cacao]
gi_351628222_gb_JP481105.1	3.11e-18	-2.14811	down	--	--	Biological Process: polysaccharide catabolic process (GO:0000272);; Molecular Function: hydrolase activity, hydrolyzing O-glycosyl compounds (GO:0004553);; Cellular Component: extracellular region (GO:0005576);; Biological Process: carbohydrate metabolic process (GO:0005975);; Molecular Function: cellulase activity (GO:0008810);; Cellular Component: chloroplast (GO:0009507);; Biological Process: …	--	Endoglucanase 6 OS=Arabidopsis thaliana GN=At1g64390 PE=2 SV=2	predicted protein [Populus trichocarpa]
gi_351596341_gb_JP450898.1	3.56e-18	-2.13849	down	--	--	Molecular Function: binding (GO:0005488);; Biological Process: defense response (GO:0006952);;	--	Putative disease resistance protein RGA3 OS=Solanum bulbocastanum GN=RGA3 PE=2 SV=2	NBS-LRR resistance protein RGH1 [Manihot esculenta]
gi_351597495_gb_JP452040.1	0.000117272	-2.1364	down	--	--	Biological Process: very long-chain fatty acid metabolic process (GO:0000038);; Molecular Function: carboxylesterase activity (GO:0004091);; Cellular Component: extracellular space (GO:0005615);; Cellular Component: cell wall (GO:0005618);; Cellular Component: nucleus (GO:0005634);; Biological Process: lipid metabolic process (GO:0006629);; Biological Process: water transport (GO:0006833);; Cellu…	--	GDSL esterase/lipase At5g45670 OS=Arabidopsis thaliana GN=At5g45670 PE=2 SV=1	PREDICTED: GDSL esterase/lipase At1g29670-like [Cucumis sativus]
gi_351599415_gb_JP453911.1	1.47e-07	-2.13157	down	--	--	Biological Process: polysaccharide biosynthetic process (GO:0000271);; Cellular Component: extracellular region (GO:0005576);; Cellular Component: cell wall (GO:0005618);; Cellular Component: Golgi apparatus (GO:0005794);; Biological Process: cellular glucan metabolic process (GO:0006073);; Biological Process: pattern specification process (GO:0007389);; Biological Process: regulation of cell siz…	K08235|1e-155|pop:POPTR_718004|hypothetical protein	Probable xyloglucan endotransglucosylase/hydrolase protein 6 OS=Arabidopsis thaliana GN=XTH6 PE=2 SV=2	xyloglucan endotransglucosylase/hydrolase 2 [Rosa x borboniana]
gi_351621030_gb_JP475331.1	2.07e-07	-2.1246	down	--	--	Biological Process: MAPK cascade (GO:0000165);; Biological Process: respiratory burst involved in defense response (GO:0002679);; Cellular Component: cell wall (GO:0005618);; Cellular Component: vacuole (GO:0005773);; Biological Process: protein targeting to membrane (GO:0006612);; Biological Process: cellular membrane fusion (GO:0006944);; Biological Process: detection of biotic stimulus (GO:000…	--	Thaumatin-like protein 1 OS=Pyrus pyrifolia GN=TL1 PE=1 SV=1	Pathogenesis-related thaumatin superfamily protein isoform 2 [Theobroma cacao]
gi_351624464_gb_JP478765.1	7.45e-06	-2.11386	down	--	--	Biological Process: reproduction (GO:0000003);; Molecular Function: catalytic activity (GO:0003824);; Molecular Function: protein binding (GO:0005515);; Cellular Component: cytoskeleton (GO:0005856);; Biological Process: cellular component movement (GO:0006928);; Biological Process: organelle organization (GO:0006996);; Biological Process: determination of left/right symmetry (GO:0007368);; Cellu…	--	Putative leucine-rich repeat-containing protein DDB_G0290503 OS=Dictyostelium discoideum GN=DDB_G0290503 PE=4 SV=1	hypothetical protein PRUPE_ppa019046mg [Prunus persica]
gi_351599500_gb_JP453993.1	1.76e-12	-2.11334	down	--	--	Molecular Function: UDP-glucosyltransferase activity (GO:0035251);; Cellular Component: cytoplasmic part (GO:0044444);; Biological Process: response to stimulus (GO:0050896);; Biological Process: organic substance metabolic process (GO:0071704);;	K13495|1e-135|vvi:100248679|hypothetical protein LOC100248679	Zeatin O-xylosyltransferase OS=Phaseolus vulgaris GN=ZOX1 PE=2 SV=1	PREDICTED: zeatin O-glucosyltransferase-like [Solanum lycopersicum]
gi_351590857_gb_JP449315.1	0.000574046	-2.11168	down	--	--	Cellular Component: extracellular region (GO:0005576);; Molecular Function: polysaccharide binding (GO:0030247);;	--	Wall-associated receptor kinase-like 20 OS=Arabidopsis thaliana GN=WAKL20 PE=2 SV=1	hypothetical protein PRUPE_ppa017824mg [Prunus persica]
gi_351617805_gb_JP472106.1	3.82e-21	-2.1103	down	--	--	Molecular Function: structural constituent of cell wall (GO:0005199);; Cellular Component: extracellular region (GO:0005576);; Cellular Component: cytosol (GO:0005829);; Biological Process: syncytium formation (GO:0006949);; Cellular Component: plant-type cell wall (GO:0009505);; Cellular Component: plasmodesma (GO:0009506);; Cellular Component: chloroplast (GO:0009507);; Biological Process: plan…	--	Expansin-A15 OS=Arabidopsis thaliana GN=EXPA15 PE=2 SV=2	hypothetical protein POPTRDRAFT_659295 [Populus trichocarpa]
gi_351618564_gb_JP472865.1	0.000403588	-2.10238	down	--	--	Molecular Function: carboxylesterase activity (GO:0004091);; Molecular Function: cholinesterase activity (GO:0004104);; Molecular Function: alpha-L-fucosidase activity (GO:0004560);; Biological Process: lipid metabolic process (GO:0006629);; Cellular Component: plant-type cell wall (GO:0009505);; Cellular Component: plasmodesma (GO:0009506);; Cellular Component: chloroplast stroma (GO:0009570);; …	--	GDSL esterase/lipase At1g54790 OS=Arabidopsis thaliana GN=At1g54790 PE=2 SV=1	PREDICTED: GDSL esterase/lipase At1g54790-like isoform 2 [Fragaria vesca subsp. vesca]
gi_351596474_gb_JP451030.1	0.000119914	-2.09581	down	--	--	Molecular Function: binding (GO:0005488);; Cellular Component: mitochondrion (GO:0005739);; Biological Process: defense response (GO:0006952);; Biological Process: response to ozone (GO:0010193);; Cellular Component: intracellular organelle part (GO:0044446);;	--	TMV resistance protein N OS=Nicotiana glutinosa GN=N PE=1 SV=1	PREDICTED: TMV resistance protein N-like [Fragaria vesca subsp. vesca]
gi_351613177_gb_JP467478.1	3.41e-08	-2.08474	down	--	--	Biological Process: respiratory burst involved in defense response (GO:0002679);; Molecular Function: peroxidase activity (GO:0004601);; Cellular Component: extracellular region (GO:0005576);; Cellular Component: nucleus (GO:0005634);; Cellular Component: endoplasmic reticulum (GO:0005783);; Biological Process: protein targeting to membrane (GO:0006612);; Biological Process: iron ion transport (G…	K00430|1e-161|pop:POPTR_718485|hypothetical protein	Peroxidase 3 OS=Arabidopsis thaliana GN=PER3 PE=2 SV=1	hypothetical protein PRUPE_ppa008540mg [Prunus persica]
gi_351609108_gb_JP463409.1	0.00513839	-2.08406	down	--	--	--	--	--	DUF593-containing protein 2, putative [Theobroma cacao]
gi_351597572_gb_JP452115.1	0.000845423	-2.07918	down	--	--	Cellular Component: nucleolus (GO:0005730);;	--	RNA-binding protein 12 OS=Pongo abelii GN=RBM12 PE=2 SV=1	unknown [Medicago truncatula]
gi_351610930_gb_JP465231.1	0.000655048	-2.07442	down	--	--	Molecular Function: nucleic acid binding (GO:0003676);; Molecular Function: sequence-specific DNA binding transcription factor activity (GO:0003700);; Cellular Component: nucleus (GO:0005634);; Biological Process: regulation of transcription, DNA-dependent (GO:0006355);; Molecular Function: zinc ion binding (GO:0008270);; Biological Process: cytokinin mediated signaling pathway (GO:0009736);; Bio…	--	Zinc finger protein 3 OS=Arabidopsis thaliana GN=ZFP3 PE=2 SV=1	hypothetical protein PRUPE_ppa021558mg, partial [Prunus persica]
gi_351623109_gb_JP477410.1	0.00743039	-2.06893	down	--	--	Cellular Component: integral to plasma membrane (GO:0005887);; Biological Process: protein targeting to membrane (GO:0006612);; Biological Process: water transport (GO:0006833);; Biological Process: response to nematode (GO:0009624);; Biological Process: response to salt stress (GO:0009651);; Biological Process: response to fructose stimulus (GO:0009750);; Biological Process: positive regulation …	--	Amino acid permease 1 OS=Arabidopsis thaliana GN=AAP1 PE=1 SV=1	hypothetical protein PRUPE_ppa014629mg [Prunus persica]
gi_351591119_gb_JP449575.1	5.56e-09	-2.06701	down	[GER]	--	Biological Process: polysaccharide biosynthetic process (GO:0000271);; Molecular Function: protein binding (GO:0005515);; Cellular Component: nucleus (GO:0005634);; Cellular Component: Golgi apparatus (GO:0005794);; Cellular Component: plasma membrane (GO:0005886);; Cellular Component: integral to plasma membrane (GO:0005887);; Cellular Component: cell cortex (GO:0005938);; Biological Process: wa…	--	Protein WALLS ARE THIN 1 OS=Arabidopsis thaliana GN=WAT1 PE=1 SV=1	Walls Are Thin 1 [Theobroma cacao]
gi_351611611_gb_JP465912.1	2.15e-18	-2.05839	down	--	--	Biological Process: xylem development (GO:0010089);; Biological Process: cell wall macromolecule metabolic process (GO:0044036);;	--	--	hypothetical protein PRUPE_ppa007187mg [Prunus persica]
gi_351616755_gb_JP471056.1	1.29e-06	-2.05811	down	--	--	Molecular Function: protein binding (GO:0005515);; Cellular Component: cytoplasm (GO:0005737);; Cellular Component: intracellular organelle (GO:0043229);; Biological Process: regulation of cellular process (GO:0050794);;	--	Actin cytoskeleton-regulatory complex protein PAN1 OS=Saccharomyces cerevisiae (strain ATCC 204508 / S288c) GN=PAN1 PE=1 SV=2	hypothetical protein PRUPE_ppa000751mg [Prunus persica]
gi_351628770_gb_JP481653.1	3.83e-12	-2.05478	down	--	--	Biological Process: response to light stimulus (GO:0009416);; Biological Process: tropism (GO:0009606);; Biological Process: response to blue light (GO:0009637);; Biological Process: flower development (GO:0009908);; Biological Process: cell tip growth (GO:0009932);; Biological Process: xylem and phloem pattern formation (GO:0010051);; Biological Process: phloem or xylem histogenesis (GO:0010087)…	--	Coleoptile phototropism protein 1 OS=Oryza sativa subsp. japonica GN=CPT1 PE=2 SV=1	hypothetical protein PRUPE_ppa003368mg [Prunus persica]
gi_351612051_gb_JP466352.1	0.000145977	-2.04752	down	--	--	--	K01673|2e-06|rcu:RCOM_0528440|carbonic anhydrase, putative (EC:4.2.1.1)	--	Carbonic anhydrase 2, CA2 isoform 1 [Theobroma cacao]
gi_351618354_gb_JP472655.1	0.00319036	-2.04239	down	--	--	Molecular Function: GTPase activity (GO:0003924);; Molecular Function: ATP binding (GO:0005524);; Cellular Component: cytoplasm (GO:0005737);; Biological Process: GTP catabolic process (GO:0006184);; Cellular Component: integral to membrane (GO:0016021);; Molecular Function: nickel cation binding (GO:0016151);; Molecular Function: metallochaperone activity (GO:0016530);; Molecular Function: prote…	--	--	hypothetical protein PRUPE_ppa026381mg [Prunus persica]
gi_351605979_gb_JP460317.1	1.28e-14	-2.04082	down	--	--	Molecular Function: aspartic-type endopeptidase activity (GO:0004190);; Cellular Component: extracellular region (GO:0005576);; Cellular Component: endoplasmic reticulum (GO:0005783);; Biological Process: proteolysis (GO:0006508);; Biological Process: defense response (GO:0006952);; Biological Process: response to water deprivation (GO:0009414);; Biological Process: salicylic acid metabolic proce…	--	Protein ASPARTIC PROTEASE IN GUARD CELL 2 OS=Arabidopsis thaliana GN=ASPG2 PE=2 SV=1	Aspartic proteinase nepenthesin-1, putative [Theobroma cacao]
gi_351617462_gb_JP471763.1	0.00206765	-2.02662	down	[IQR]	--	Molecular Function: copper ion binding (GO:0005507);; Cellular Component: extracellular region (GO:0005576);; Cellular Component: cytosol (GO:0005829);; Cellular Component: plasma membrane (GO:0005886);; Biological Process: proline biosynthetic process (GO:0006561);; Biological Process: steroid metabolic process (GO:0008202);; Biological Process: response to heat (GO:0009408);; Biological Process…	--	Momilactone A synthase OS=Oryza sativa subsp. japonica GN=Os04g0179200 PE=2 SV=1	NAD(P)-binding Rossmann-fold superfamily protein [Theobroma cacao]
gi_351603670_gb_JP458026.1	9.81e-10	-2.02518	down	--	--	Cellular Component: extracellular region (GO:0005576);; Biological Process: carbohydrate metabolic process (GO:0005975);; Molecular Function: cellulase activity (GO:0008810);; Cellular Component: chloroplast (GO:0009507);; Biological Process: plant-type cell wall organization (GO:0009664);; Biological Process: trichoblast differentiation (GO:0010054);; Cellular Component: cytoplasmic membrane-bou…	--	Endoglucanase 6 OS=Arabidopsis thaliana GN=At1g64390 PE=2 SV=2	endo-beta-1,4-glucanase [Prunus persica]
gi_351617382_gb_JP471683.1	0.00317605	-2.01964	down	--	--	Molecular Function: protein binding (GO:0005515);; Biological Process: cellular process (GO:0009987);; Cellular Component: cell part (GO:0044464);; Biological Process: innate immune response (GO:0045087);;	--	Putative disease resistance RPP13-like protein 1 OS=Arabidopsis thaliana GN=RPPL1 PE=3 SV=1	hypothetical protein PRUPE_ppa024822mg [Prunus persica]
gi_351619567_gb_JP473868.1	1.57e-05	-2.01162	down	[TZDR]	--	Molecular Function: calcium ion binding (GO:0005509);; Cellular Component: nucleus (GO:0005634);; Cellular Component: mitochondrion (GO:0005739);; Biological Process: response to cold (GO:0009409);; Biological Process: regulation of flower development (GO:0009909);; Biological Process: response to ozone (GO:0010193);; Molecular Function: metal ion binding (GO:0046872);; Biological Process: root h…	--	Calmodulin-like protein 1 OS=Arabidopsis thaliana GN=CML1 PE=2 SV=1	PREDICTED: calmodulin-like protein 1-like [Fragaria vesca subsp. vesca]
gi_351620287_gb_JP474588.1	1.51e-14	-2.01071	down	--	--	Molecular Function: DNA binding (GO:0003677);; Molecular Function: sequence-specific DNA binding transcription factor activity (GO:0003700);; Molecular Function: binding (GO:0005488);; Cellular Component: nucleus (GO:0005634);; Biological Process: regulation of transcription, DNA-dependent (GO:0006355);; Biological Process: fatty acid catabolic process (GO:0009062);; Biological Process: jasmonic …	--	Transcription factor bHLH48 OS=Arabidopsis thaliana GN=BHLH48 PE=2 SV=1	PREDICTED: transcription factor bHLH60-like [Cucumis sativus]
gi_351607577_gb_JP461897.1	0.00347542	-2.00168	down	--	--	Biological Process: response to stress (GO:0006950);; Cellular Component: plastid envelope (GO:0009526);; Biological Process: response to abiotic stimulus (GO:0009628);; Biological Process: jasmonic acid biosynthetic process (GO:0009695);; Cellular Component: membrane (GO:0016020);; Cellular Component: chloroplast part (GO:0044434);; Molecular Function: allene-oxide cyclase activity (GO:0046423);;	--	Allene oxide cyclase 2, chloroplastic OS=Arabidopsis thaliana GN=AOC2 PE=1 SV=1	putative allene oxide cyclase, partial [Catharanthus roseus]
gi_351614816_gb_JP469117.1	1.4e-13	-1.99496	down	--	--	--	--	Hornerin OS=Homo sapiens GN=HRNR PE=1 SV=2	hypothetical protein A1Q2_06528 [Trichosporon asahii var. asahii CBS 8904]
gi_351621965_gb_JP476266.1	2.28e-05	-1.98718	down	--	--	Cellular Component: nucleus (GO:0005634);;	--	--	predicted protein [Populus trichocarpa]
gi_351616572_gb_JP470873.1	1.61e-12	-1.98389	down	--	--	Cellular Component: anchored to plasma membrane (GO:0046658);;	--	Uncharacterized GPI-anchored protein At4g28100 OS=Arabidopsis thaliana GN=At4g28100 PE=1 SV=1	hypothetical protein PRUPE_ppa008626mg [Prunus persica]
gi_351621843_gb_JP476144.1	7.03e-05	-1.97988	down	--	--	Biological Process: response to chemical stimulus (GO:0042221);; Cellular Component: intracellular membrane-bounded organelle (GO:0043231);; Cellular Component: intracellular non-membrane-bounded organelle (GO:0043232);; Biological Process: macromolecule modification (GO:0043412);; Biological Process: cellular protein metabolic process (GO:0044267);; Cellular Component: cytoplasmic part (GO:00444…	--	RING-H2 zinc finger protein RHA4a OS=Arabidopsis thaliana GN=RHA4A PE=2 SV=1	PREDICTED: RING-H2 zinc finger protein RHA4a [Vitis vinifera]
gi_351615280_gb_JP469581.1	1.41e-07	-1.97975	down	--	--	Molecular Function: DNA binding (GO:0003677);; Biological Process: pentose-phosphate shunt (GO:0006098);; Biological Process: rRNA processing (GO:0006364);; Cellular Component: plastid chromosome (GO:0009508);; Biological Process: response to abscisic acid stimulus (GO:0009737);; Biological Process: photosynthetic electron transport in photosystem I (GO:0009773);; Cellular Component: chloroplast …	--	Thylakoid membrane phosphoprotein 14 kDa, chloroplastic OS=Arabidopsis thaliana GN=TMP14 PE=1 SV=2	Photosystem I P subunit isoform 2 [Theobroma cacao]
gi_351590887_gb_JP449345.1	0.00158418	-1.9778	down	--	--	Molecular Function: peroxidase activity (GO:0004601);; Cellular Component: vacuole (GO:0005773);; Cellular Component: vacuolar membrane (GO:0005774);; Cellular Component: Golgi apparatus (GO:0005794);; Biological Process: ion transport (GO:0006811);; Biological Process: response to oxidative stress (GO:0006979);; Biological Process: response to desiccation (GO:0009269);; Biological Process: respo…	K00430|1e-157|pop:POPTR_830144|hypothetical protein	Peroxidase 12 OS=Arabidopsis thaliana GN=PER12 PE=1 SV=1	hypothetical protein PRUPE_ppa007748mg [Prunus persica]
gi_351621676_gb_JP475977.1	1.3e-06	-1.97331	down	--	--	--	--	S-norcoclaurine synthase OS=Thalictrum flavum subsp. glaucum PE=1 SV=1	PREDICTED: S-norcoclaurine synthase-like [Cicer arietinum]
gi_351610097_gb_JP464398.1	0.000137399	-1.97094	down	--	--	Cellular Component: plasma membrane (GO:0005886);; Biological Process: response to stress (GO:0006950);; Cellular Component: anchored to membrane (GO:0031225);; Biological Process: response to chemical stimulus (GO:0042221);; Cellular Component: intracellular membrane-bounded organelle (GO:0043231);; Biological Process: primary metabolic process (GO:0044238);; Cellular Component: cytoplasmic part…	--	Non-specific lipid-transfer protein-like protein At2g13820 OS=Arabidopsis thaliana GN=At2g13820 PE=1 SV=1	PREDICTED: non-specific lipid-transfer protein-like protein At2g13820-like [Fragaria vesca subsp. vesca]
gi_351620070_gb_JP474371.1	9.97e-13	-1.96917	down	--	--	Cellular Component: nucleus (GO:0005634);; Cellular Component: plant-type cell wall (GO:0009505);;	--	--	PREDICTED: uncharacterized protein LOC100245695 [Vitis vinifera]
gi_351603709_gb_JP458065.1	2.39e-09	-1.95992	down	--	--	--	--	Uncharacterized histidine-rich protein DDB_G0274557 OS=Dictyostelium discoideum GN=DDB_G0274557 PE=4 SV=1	hypothetical protein PRUPE_ppa018170mg [Prunus persica]
gi_351629092_gb_JP481975.1	1.01e-05	-1.95557	down	[HC]	--	Biological Process: polysaccharide biosynthetic process (GO:0000271);; Molecular Function: squalene monooxygenase activity (GO:0004506);; Cellular Component: extracellular region (GO:0005576);; Cellular Component: endoplasmic reticulum membrane (GO:0005789);; Biological Process: cholesterol biosynthetic process (GO:0006695);; Biological Process: cellular aromatic compound metabolic process (GO:00…	K00511|0.0|vvi:100254037|hypothetical protein LOC100254037	Squalene monooxygenase OS=Panax ginseng PE=2 SV=1	hypothetical protein PRUPE_ppa003991mg [Prunus persica]
gi_351618144_gb_JP472445.1	8.27e-17	-1.95499	down	--	--	Cellular Component: nucleus (GO:0005634);; Biological Process: defense response (GO:0006952);; Cellular Component: chloroplast (GO:0009507);; Biological Process: response to biotic stimulus (GO:0009607);; Biological Process: response to inorganic substance (GO:0010035);; Biological Process: type I hypersensitivity (GO:0016068);; Biological Process: cellular cation homeostasis (GO:0030003);; Biolo…	--	MLP-like protein 28 OS=Arabidopsis thaliana GN=MLP28 PE=1 SV=1	major latex-like protein [Prunus persica]
gi_351596487_gb_JP451043.1	4.38e-16	-1.95179	down	--	--	Biological Process: MAPK cascade (GO:0000165);; Molecular Function: sequence-specific DNA binding transcription factor activity (GO:0003700);; Molecular Function: ATP binding (GO:0005524);; Cellular Component: cell wall (GO:0005618);; Cellular Component: nucleus (GO:0005634);; Biological Process: protein targeting to membrane (GO:0006612);; Biological Process: signal transduction (GO:0007165);; B…	--	Ribulose bisphosphate carboxylase/oxygenase activase 1, chloroplastic OS=Larrea tridentata GN=RCA1 PE=1 SV=1	PREDICTED: ribulose bisphosphate carboxylase/oxygenase activase 2, chloroplastic isoform 1 [Vitis vinifera]
gi_351610538_gb_JP464839.1	0.00862163	-1.94684	down	--	--	Molecular Function: phosphoprotein phosphatase activity (GO:0004721);;	--	--	hypothetical protein PRUPE_ppa016161mg [Prunus persica]
gi_351622592_gb_JP476893.1	1.91e-05	-1.94382	down	--	--	Biological Process: cell communication (GO:0007154);; Biological Process: response to abiotic stimulus (GO:0009628);; Molecular Function: transferase activity, transferring glycosyl groups (GO:0016757);; Biological Process: carboxylic acid metabolic process (GO:0019752);; Biological Process: cellular response to stress (GO:0033554);; Molecular Function: UDP-glucosyltransferase activity (GO:003525…	--	UDP-glycosyltransferase 83A1 OS=Arabidopsis thaliana GN=UGT83A1 PE=2 SV=1	UDP-glucuronosyltransferase, putative [Ricinus communis]
gi_351609944_gb_JP464245.1	0.000919414	-1.93886	down	--	--	Molecular Function: polysaccharide binding (GO:0030247);;	--	Uncharacterized protein LOC284861 OS=Homo sapiens PE=2 SV=1	PREDICTED: uncharacterized protein LOC101310691 [Fragaria vesca subsp. vesca]
gi_351629172_gb_JP482055.1	0.00167682	-1.93407	down	[QR]	--	Cellular Component: cytoplasm (GO:0005737);; Biological Process: isoflavonoid phytoalexin biosynthetic process (GO:0009701);; Biological Process: flavonoid metabolic process (GO:0009812);; Biological Process: alkaloid biosynthetic process (GO:0009821);; Molecular Function: catechol O-methyltransferase activity (GO:0016206);; Molecular Function: isoflavone 4'-O-methyltransferase activity (GO:00307…	--	Trans-resveratrol di-O-methyltransferase OS=Vitis vinifera GN=ROMT PE=1 SV=2	O-methyltransferase 3 [Humulus lupulus]
gi_351619719_gb_JP474020.1	0.000248735	-1.93321	down	--	--	--	--	--	hypothetical protein PRUPE_ppb011733mg [Prunus persica]
gi_351614825_gb_JP469126.1	1.28e-05	-1.93168	down	--	--	Molecular Function: nucleic acid binding (GO:0003676);; Cellular Component: nucleolus (GO:0005730);; Biological Process: regulation of transcription, DNA-dependent (GO:0006355);; Biological Process: metabolic process (GO:0008152);; Biological Process: filamentous growth (GO:0030447);; Cellular Component: nuclear lumen (GO:0031981);; Cellular Component: small-subunit processome (GO:0032040);; Cell…	--	Protein PXR1 OS=Debaryomyces hansenii (strain ATCC 36239 / CBS 767 / JCM 1990 / NBRC 0083 / IGC 2968) GN=PXR1 PE=3 SV=1	hypothetical protein PHYSODRAFT_257855 [Phytophthora sojae]
gi_351621283_gb_JP475584.1	9.09e-10	-1.93108	down	--	--	Molecular Function: inorganic phosphate transmembrane transporter activity (GO:0005315);; Molecular Function: glucose transmembrane transporter activity (GO:0005355);; Cellular Component: mitochondrion (GO:0005739);; Cellular Component: vacuolar membrane (GO:0005774);; Cellular Component: plasma membrane (GO:0005886);; Biological Process: glucose catabolic process (GO:0006007);; Biological Proces…	--	Glucose-6-phosphate/phosphate translocator 2, chloroplastic OS=Arabidopsis thaliana GN=GPT2 PE=2 SV=2	hypothetical protein PRUPE_ppa006608mg [Prunus persica]
gi_351613982_gb_JP468283.1	2.33e-08	-1.92995	down	--	--	Molecular Function: protein binding (GO:0005515);; Cellular Component: nucleus (GO:0005634);; Cellular Component: cytoplasm (GO:0005737);; Cellular Component: plasma membrane (GO:0005886);; Biological Process: lipid transport (GO:0006869);; Molecular Function: lipid binding (GO:0008289);; Cellular Component: plasmodesma (GO:0009506);; Cellular Component: chloroplast thylakoid membrane (GO:0009535…	--	36.4 kDa proline-rich protein OS=Solanum lycopersicum GN=TPRP-F1 PE=2 SV=1	ADR11 [Glycine max]
gi_351611219_gb_JP465520.1	1.71e-08	-1.90715	down	--	--	Molecular Function: structural constituent of cell wall (GO:0005199);; Cellular Component: extracellular region (GO:0005576);; Cellular Component: cytosol (GO:0005829);; Biological Process: syncytium formation (GO:0006949);; Cellular Component: plant-type cell wall (GO:0009505);; Cellular Component: plasmodesma (GO:0009506);; Cellular Component: chloroplast (GO:0009507);; Biological Process: plan…	--	Expansin-A3 OS=Arabidopsis thaliana GN=EXPA3 PE=2 SV=1	expansin 11 precursor [Rumex palustris]
gi_351619887_gb_JP474188.1	0.00159633	-1.90301	down	--	--	Cellular Component: cytoplasm (GO:0005737);; Biological Process: pollen tube growth (GO:0009860);;	--	CRIB domain-containing protein RIC10 OS=Arabidopsis thaliana GN=RIC10 PE=2 SV=1	PREDICTED: uncharacterized protein LOC100258839 [Vitis vinifera]
gi_351597655_gb_JP452197.1	8.99e-06	-1.89647	down	--	--	Biological Process: defense response to nematode (GO:0002215);; Biological Process: respiratory burst involved in defense response (GO:0002679);; Molecular Function: peroxidase activity (GO:0004601);; Cellular Component: extracellular region (GO:0005576);; Cellular Component: nucleus (GO:0005634);; Cellular Component: vacuolar membrane (GO:0005774);; Cellular Component: endoplasmic reticulum (GO:…	--	Peroxidase 5 OS=Vitis vinifera GN=GSVIVT00037159001 PE=1 SV=2	PREDICTED: peroxidase 5-like [Fragaria vesca subsp. vesca]
gi_351623962_gb_JP478263.1	7.12e-11	-1.89514	down	--	--	Cellular Component: chloroplast thylakoid membrane (GO:0009535);; Biological Process: response to blue light (GO:0009637);; Biological Process: regulation of proton transport (GO:0010155);; Biological Process: cellular cation homeostasis (GO:0030003);; Biological Process: protein autophosphorylation (GO:0046777);; Biological Process: divalent metal ion transport (GO:0070838);;	--	--	hypothetical protein PRUPE_ppa010487mg [Prunus persica]
gi_351604570_gb_JP458921.1	0.00316566	-1.89264	down	--	--	Cellular Component: 1,3-beta-D-glucan synthase complex (GO:0000148);; Molecular Function: 1,3-beta-D-glucan synthase activity (GO:0003843);; Cellular Component: Golgi apparatus (GO:0005794);; Cellular Component: plasma membrane (GO:0005886);; Biological Process: (1->3)-beta-D-glucan biosynthetic process (GO:0006075);; Biological Process: protein targeting to membrane (GO:0006612);; Biological Pro…	K11000|0.0|rcu:RCOM_0747060|transferase, transferring glycosyl groups, putative (EC:2.4.1.34)	Putative callose synthase 8 OS=Arabidopsis thaliana GN=CALS8 PE=2 SV=2	hypothetical protein PRUPE_ppa000073mg [Prunus persica]
gi_351614202_gb_JP468503.1	2.1e-13	-1.89071	down	--	--	--	--	--	PREDICTED: uncharacterized protein LOC100776799 [Glycine max]
gi_351619744_gb_JP474045.1	6.95e-07	-1.8887	down	--	--	Biological Process: response to karrikin (GO:0080167);;	--	--	Uncharacterized protein TCM_002679 [Theobroma cacao]
gi_351615102_gb_JP469403.1	3.72e-06	-1.88346	down	[RTKL]	--	Biological Process: transition metal ion transport (GO:0000041);; Biological Process: respiratory burst involved in defense response (GO:0002679);; Molecular Function: protein serine/threonine kinase activity (GO:0004674);; Molecular Function: ATP binding (GO:0005524);; Cellular Component: plasma membrane (GO:0005886);; Biological Process: glycolysis (GO:0006096);; Biological Process: protein pho…	--	Probable LRR receptor-like serine/threonine-protein kinase At1g67720 OS=Arabidopsis thaliana GN=At1g67720 PE=2 SV=1	Leucine-rich repeat protein kinase family protein isoform 2 [Theobroma cacao]
gi_351597434_gb_JP451980.1	6.42e-15	-1.87565	down	--	--	Molecular Function: enzyme inhibitor activity (GO:0004857);; Cellular Component: nucleus (GO:0005634);; Cellular Component: endosome (GO:0005768);; Cellular Component: vacuolar membrane (GO:0005774);; Cellular Component: Golgi apparatus (GO:0005794);; Cellular Component: trans-Golgi network (GO:0005802);; Cellular Component: plasma membrane (GO:0005886);; Biological Process: protein targeting to …	--	Probable pectinesterase/pectinesterase inhibitor 34 OS=Arabidopsis thaliana GN=PME34 PE=2 SV=1	predicted protein [Populus trichocarpa]
gi_351595777_gb_JP450342.1	7.23e-06	-1.87348	down	--	--	Cellular Component: extracellular region (GO:0005576);; Cellular Component: endoplasmic reticulum (GO:0005783);; Biological Process: carbohydrate metabolic process (GO:0005975);; Biological Process: chromatin silencing (GO:0006342);; Biological Process: cell communication (GO:0007154);; Cellular Component: plant-type cell wall (GO:0009505);; Cellular Component: plasmodesma (GO:0009506);; Biologic…	--	Glucan endo-1,3-beta-glucosidase 12 OS=Arabidopsis thaliana GN=At4g29360 PE=1 SV=1	hypothetical protein PRUPE_ppa005142mg [Prunus persica]
gi_351628018_gb_JP480901.1	5.33e-05	-1.86188	down	--	--	Cellular Component: extracellular region (GO:0005576);; Cellular Component: cell wall (GO:0005618);; Biological Process: oligopeptide transport (GO:0006857);; Biological Process: response to salt stress (GO:0009651);; Cellular Component: cytoplasmic membrane-bounded vesicle (GO:0016023);; Molecular Function: manganese ion binding (GO:0030145);; Cellular Component: extracellular matrix (GO:0031012…	--	Germin-like protein subfamily 1 member 13 OS=Arabidopsis thaliana GN=GLP6 PE=2 SV=2	hypothetical protein PRUPE_ppa016284mg [Prunus persica]
gi_351628805_gb_JP481688.1	1.36e-11	-1.85661	down	[RTKL]	--	Biological Process: activation of MAPKK activity (GO:0000186);; Molecular Function: protein serine/threonine kinase activity (GO:0004674);; Molecular Function: MAP kinase kinase kinase activity (GO:0004709);; Molecular Function: ATP binding (GO:0005524);; Cellular Component: extracellular region (GO:0005576);; Cellular Component: vacuole (GO:0005773);; Cellular Component: plasma membrane (GO:0005…	--	Probable leucine-rich repeat receptor-like protein kinase At5g49770 OS=Arabidopsis thaliana GN=At5g49770 PE=2 SV=1	Serine/threonine-protein kinase PBS1, putative [Ricinus communis]
gi_351629244_gb_JP482127.1	1.13e-05	-1.85578	down	--	--	Biological Process: mitotic spindle elongation (GO:0000022);; Cellular Component: astral microtubule (GO:0000235);; Biological Process: regionalization (GO:0003002);; Molecular Function: microtubule motor activity (GO:0003777);; Molecular Function: calmodulin binding (GO:0005516);; Molecular Function: ATP binding (GO:0005524);; Cellular Component: nucleus (GO:0005634);; Cellular Component: mitoch…	--	Kinesin-4 OS=Arabidopsis thaliana GN=ATK4 PE=1 SV=2	hypothetical protein PRUPE_ppa017673mg [Prunus persica]
gi_351610844_gb_JP465145.1	0.00330062	-1.85497	down	--	--	Cellular Component: plasma membrane (GO:0005886);; Cellular Component: integral to membrane (GO:0016021);;	--	CASP-like protein ARALYDRAFT_321547 OS=Arabidopsis lyrata subsp. lyrata GN=ARALYDRAFT_321547 PE=3 SV=1	hypothetical protein PRUPE_ppa011435mg [Prunus persica]
gi_351604021_gb_JP458375.1	0.000607474	-1.85488	down	--	--	Biological Process: transition metal ion transport (GO:0000041);; Biological Process: cellular amino acid metabolic process (GO:0006520);; Biological Process: protein targeting to membrane (GO:0006612);; Biological Process: anion transport (GO:0006820);; Biological Process: response to wounding (GO:0009611);; Biological Process: response to toxin (GO:0009636);; Biological Process: response to sal…	--	Hydroquinone glucosyltransferase OS=Rauvolfia serpentina GN=AS PE=1 SV=1	UDP-glucose:glucosyltransferase [Lycium barbarum]
gi_351622892_gb_JP477193.1	1.38e-06	-1.85287	down	--	--	--	--	Late embryogenesis abundant protein 2 OS=Cicer arietinum PE=1 SV=1	putative LEA III protein isoform 1 [Corylus avellana]
gi_351612408_gb_JP466709.1	0.000845423	-1.8441	down	--	--	Biological Process: rRNA processing (GO:0006364);; Cellular Component: thylakoid light-harvesting complex (GO:0009503);; Cellular Component: photosystem (GO:0009521);; Cellular Component: chloroplast thylakoid membrane (GO:0009535);; Biological Process: response to blue light (GO:0009637);; Biological Process: response to high light intensity (GO:0009644);; Biological Process: response to sucrose…	K08915|1e-150|rcu:RCOM_0593190|chlorophyll A/B binding protein, putative	Chlorophyll a-b binding protein CP29.3, chloroplastic OS=Arabidopsis thaliana GN=LHCB4.3 PE=1 SV=1	hypothetical protein PRUPE_ppa009686mg [Prunus persica]
gi_351620230_gb_JP474531.1	7.78e-11	-1.8352	down	--	--	Molecular Function: binding (GO:0005488);; Cellular Component: extracellular region (GO:0005576);; Cellular Component: plasma membrane (GO:0005886);; Biological Process: carbohydrate metabolic process (GO:0005975);; Biological Process: anatomical structure morphogenesis (GO:0009653);; Biological Process: cellular component organization (GO:0016043);; Cellular Component: intracellular membrane-bou…	--	Merozoite surface protein CMZ-8 (Fragment) OS=Eimeria acervulina PE=2 SV=1	hypothetical protein PRUPE_ppb010066mg [Prunus persica]
gi_351620069_gb_JP474370.1	4.26e-06	-1.82437	down	--	--	Cellular Component: extracellular region (GO:0005576);; Cellular Component: cell wall (GO:0005618);; Biological Process: oligopeptide transport (GO:0006857);; Biological Process: response to salt stress (GO:0009651);; Cellular Component: cytoplasmic membrane-bounded vesicle (GO:0016023);; Molecular Function: manganese ion binding (GO:0030145);; Cellular Component: extracellular matrix (GO:0031012…	--	Germin-like protein subfamily 1 member 16 OS=Arabidopsis thaliana GN=At5g39130 PE=2 SV=1	hypothetical protein PRUPE_ppa016284mg [Prunus persica]
gi_351603471_gb_JP457829.1	9.51e-06	-1.82378	down	--	--	Biological Process: response to xenobiotic stimulus (GO:0009410);; Biological Process: photomorphogenesis (GO:0009640);; Biological Process: embryo development ending in seed dormancy (GO:0009793);; Biological Process: seed germination (GO:0009845);; Biological Process: determination of bilateral symmetry (GO:0009855);; Biological Process: regulation of flower development (GO:0009909);; Biologica…	--	Probable RNA-dependent RNA polymerase 3 OS=Arabidopsis thaliana GN=RDR3 PE=3 SV=2	hypothetical protein PRUPE_ppa001584mg [Prunus persica]
gi_351598233_gb_JP452761.1	2.25e-05	-1.82033	down	--	--	Biological Process: maltose metabolic process (GO:0000023);; Cellular Component: extracellular region (GO:0005576);; Biological Process: microtubule nucleation (GO:0007020);; Cellular Component: plant-type cell wall (GO:0009505);; Biological Process: positive regulation of flower development (GO:0009911);; Biological Process: leaf morphogenesis (GO:0009965);; Cellular Component: cytoplasmic membr…	K07407|0.0|pop:POPTR_786149|alpha-galactosidase (EC:3.2.1.22)	Alpha-galactosidase OS=Coffea arabica PE=1 SV=1	predicted protein [Populus trichocarpa]
gi_351615231_gb_JP469532.1	0.0025749	-1.81479	down	--	--	Molecular Function: organic cyclic compound binding (GO:0097159);;	--	--	PREDICTED: uncharacterized protein LOC101297372 [Fragaria vesca subsp. vesca]
gi_351598913_gb_JP453420.1	0.00194969	-1.81154	down	--	--	Cellular Component: cytoplasm (GO:0005737);; Molecular Function: sulfotransferase activity (GO:0008146);; Biological Process: response to abiotic stimulus (GO:0009628);; Biological Process: jasmonic acid biosynthetic process (GO:0009695);; Biological Process: response to cytokinin stimulus (GO:0009735);; Biological Process: flavonoid metabolic process (GO:0009812);; Biological Process: jasmonic a…	--	Cytosolic sulfotransferase 15 OS=Arabidopsis thaliana GN=SOT15 PE=1 SV=1	Sulfotransferase 2A, putative [Theobroma cacao]
gi_351615442_gb_JP469743.1	0.000640466	-1.81016	down	--	--	Cellular Component: extracellular region (GO:0005576);; Cellular Component: cell wall (GO:0005618);; Cellular Component: vacuole (GO:0005773);; Biological Process: signal transduction (GO:0007165);; Biological Process: response to virus (GO:0009615);; Biological Process: systemic acquired resistance (GO:0009627);; Biological Process: response to organic substance (GO:0010033);; Biological Process…	--	Thaumatin-like protein OS=Oryza sativa subsp. japonica GN=Os11g0706600 PE=2 SV=1	PREDICTED: thaumatin-like protein-like [Fragaria vesca subsp. vesca]
gi_351605593_gb_JP459937.1	3.14e-12	-1.80832	down	--	--	Biological Process: polysaccharide biosynthetic process (GO:0000271);; Cellular Component: cell wall (GO:0005618);; Cellular Component: nucleus (GO:0005634);; Cellular Component: mitochondrion (GO:0005739);; Cellular Component: plasma membrane (GO:0005886);; Biological Process: pattern specification process (GO:0007389);; Biological Process: multidimensional cell growth (GO:0009825);; Biological …	--	Formin-like protein 2 OS=Arabidopsis thaliana GN=FH2 PE=3 SV=1	hypothetical protein PRUPE_ppa001116mg [Prunus persica]
gi_351612874_gb_JP467175.1	0.000137399	-1.79925	down	--	--	Biological Process: reproduction (GO:0000003);; Cellular Component: extracellular region (GO:0005576);; Molecular Function: transferase activity, transferring acyl groups (GO:0016746);; Molecular Function: hydrolase activity, acting on ester bonds (GO:0016788);; Biological Process: glucosinolate biosynthetic process (GO:0019761);;	--	GDSL esterase/lipase At3g14820 OS=Arabidopsis thaliana GN=At3g14820 PE=3 SV=2	hypothetical protein PRUPE_ppa023913mg, partial [Prunus persica]
gi_351612705_gb_JP467006.1	1.11e-08	-1.79912	down	--	--	--	--	--	predicted protein [Populus trichocarpa]
gi_351624238_gb_JP478539.1	0.0029585	-1.7952	down	--	--	--	--	F-box protein SKIP23 OS=Arabidopsis thaliana GN=SKIP23 PE=1 SV=1	hypothetical protein PRUPE_ppa006538mg [Prunus persica]
gi_351616376_gb_JP470677.1	0.000131029	-1.79492	down	--	--	Cellular Component: mitochondrion (GO:0005739);; Cellular Component: plasma membrane (GO:0005886);; Cellular Component: chloroplast thylakoid membrane (GO:0009535);; Biological Process: regulation of proton transport (GO:0010155);; Biological Process: NADH dehydrogenase complex (plastoquinone) assembly (GO:0010258);; Cellular Component: NAD(P)H dehydrogenase complex (plastoquinone) (GO:0010598);;…	--	NAD(P)H-quinone oxidoreductase subunit O OS=Gloeobacter violaceus (strain PCC 7421) GN=ndhO PE=3 SV=1	predicted protein [Populus trichocarpa]
gi_351601257_gb_JP455707.1	0.00596857	-1.78475	down	--	--	--	--	--	Nucleic acid binding protein, putative [Theobroma cacao]
gi_351597453_gb_JP451999.1	3.74e-10	-1.78398	down	--	--	--	--	13S globulin seed storage protein 2 OS=Fagopyrum esculentum GN=FA18 PE=2 SV=1	PREDICTED: glutelin type-A 2 [Vitis vinifera]
gi_351614907_gb_JP469208.1	2.88e-07	-1.77454	down	--	--	--	--	--	ATP binding protein, putative [Ricinus communis]
gi_351618140_gb_JP472441.1	0.00513162	-1.766	down	[MU]	--	--	--	Immunoglobulin A1 protease autotransporter OS=Haemophilus influenzae (strain ATCC 51907 / DSM 11121 / KW20 / Rd) GN=iga PE=1 SV=1	PREDICTED: uncharacterized protein LOC100241687 [Vitis vinifera]
gi_351616013_gb_JP470314.1	0.00151865	-1.76524	down	--	--	--	--	--	hypothetical protein PRUPE_ppa011192mg [Prunus persica]
gi_351602024_gb_JP456459.1	0.00863241	-1.76381	down	--	--	Biological Process: amino acid transmembrane transport (GO:0003333);; Cellular Component: integral to plasma membrane (GO:0005887);; Biological Process: protein targeting to membrane (GO:0006612);; Biological Process: water transport (GO:0006833);; Biological Process: response to nematode (GO:0009624);; Biological Process: response to salt stress (GO:0009651);; Biological Process: response to fru…	--	Probable amino acid permease 7 OS=Arabidopsis thaliana GN=AAP7 PE=1 SV=1	hypothetical protein PRUPE_ppa013627mg [Prunus persica]
gi_351598454_gb_JP452976.1	5.09e-09	-1.76375	down	--	--	Molecular Function: binding (GO:0005488);; Biological Process: defense response (GO:0006952);;	--	Putative disease resistance protein RGA4 OS=Solanum bulbocastanum GN=RGA4 PE=2 SV=1	LRR and NB-ARC domains-containing disease resistance protein, putative [Theobroma cacao]
gi_351618141_gb_JP472442.1	0.0027518	-1.76162	down	--	--	Cellular Component: mitochondrion (GO:0005739);; Cellular Component: peroxisomal membrane (GO:0005778);; Cellular Component: integral to membrane (GO:0016021);; Biological Process: cellular component organization (GO:0016043);; Biological Process: regulation of cellular process (GO:0050794);; Biological Process: reactive oxygen species metabolic process (GO:0072593);;	--	Peroxisomal membrane protein PMP22 OS=Arabidopsis thaliana GN=PMP22 PE=1 SV=1	PREDICTED: peroxisomal membrane protein PMP22 [Vitis vinifera]
gi_351613346_gb_JP467647.1	5.19e-11	-1.7576	down	--	--	Biological Process: immune system process (GO:0002376);; Molecular Function: peroxidase activity (GO:0004601);; Molecular Function: protein binding (GO:0005515);; Cellular Component: nucleus (GO:0005634);; Biological Process: iron ion transport (GO:0006826);; Biological Process: response to oxidative stress (GO:0006979);; Biological Process: response to desiccation (GO:0009269);; Biological Proce…	--	Peroxidase 64 OS=Arabidopsis thaliana GN=PER64 PE=1 SV=1	predicted protein [Populus trichocarpa]
gi_351602974_gb_JP457334.1	4.16e-08	-1.7485	down	--	--	Cellular Component: chloroplast (GO:0009507);;	--	--	conserved hypothetical protein [Ricinus communis]
gi_351596696_gb_JP451251.1	8.7e-05	-1.7439	down	--	--	Cellular Component: 1,3-beta-D-glucan synthase complex (GO:0000148);; Molecular Function: 1,3-beta-D-glucan synthase activity (GO:0003843);; Cellular Component: Golgi apparatus (GO:0005794);; Biological Process: (1->3)-beta-D-glucan biosynthetic process (GO:0006075);; Biological Process: protein targeting to membrane (GO:0006612);; Biological Process: nucleotide transport (GO:0006862);; Biologica…	K11000|0.0|pop:POPTR_568599|hypothetical protein	Putative callose synthase 8 OS=Arabidopsis thaliana GN=CALS8 PE=2 SV=2	hypothetical protein PRUPE_ppa000073mg [Prunus persica]
gi_351610043_gb_JP464344.1	0.00105152	-1.74058	down	--	--	Molecular Function: nucleic acid binding (GO:0003676);; Molecular Function: transferase activity, transferring phosphorus-containing groups (GO:0016772);; Biological Process: primary metabolic process (GO:0044238);; Biological Process: cellular macromolecule metabolic process (GO:0044260);;	--	Uncharacterized mitochondrial protein AtMg00310 OS=Arabidopsis thaliana GN=AtMg00310 PE=4 SV=1	PREDICTED: LOW QUALITY PROTEIN: putative ribonuclease H protein At1g65750-like [Vitis vinifera]
gi_351621298_gb_JP475599.1	3.49e-06	-1.73936	down	--	--	Biological Process: defense response (GO:0006952);; Biological Process: cell communication (GO:0007154);; Biological Process: biosynthetic process (GO:0009058);; Biological Process: response to xenobiotic stimulus (GO:0009410);; Biological Process: photomorphogenesis (GO:0009640);; Biological Process: embryo development ending in seed dormancy (GO:0009793);; Biological Process: seed germination (…	--	Probable RNA-dependent RNA polymerase 3 OS=Arabidopsis thaliana GN=RDR3 PE=3 SV=2	unnamed protein product [Vitis vinifera]
gi_351622303_gb_JP476604.1	0.00245005	-1.73732	down	--	--	Molecular Function: inorganic phosphate transmembrane transporter activity (GO:0005315);; Cellular Component: mitochondrion (GO:0005739);; Biological Process: glucose catabolic process (GO:0006007);; Biological Process: purine nucleobase transport (GO:0006863);; Biological Process: vacuole organization (GO:0007033);; Cellular Component: chloroplast thylakoid (GO:0009534);; Biological Process: emb…	--	Triose phosphate/phosphate translocator, chloroplastic OS=Zea mays GN=TPT PE=1 SV=1	unknown [Zea mays]
gi_351618302_gb_JP472603.1	0.000111922	-1.73476	down	--	--	Biological Process: very long-chain fatty acid metabolic process (GO:0000038);; Biological Process: polysaccharide biosynthetic process (GO:0000271);; Molecular Function: carboxylesterase activity (GO:0004091);; Biological Process: lipid metabolic process (GO:0006629);; Biological Process: pattern specification process (GO:0007389);; Biological Process: regulation of cell size (GO:0008361);; Biol…	--	GDSL esterase/lipase At5g22810 OS=Arabidopsis thaliana GN=At5g22810 PE=2 SV=3	GDSL esterase/lipase isoform 1 [Theobroma cacao]
gi_351597555_gb_JP452100.1	0.00127113	-1.73395	down	--	--	Biological Process: cellular aromatic compound metabolic process (GO:0006725);; Molecular Function: UDP-glycosyltransferase activity (GO:0008194);; Biological Process: response to UV (GO:0009411);; Biological Process: response to salicylic acid stimulus (GO:0009751);; Biological Process: flavonoid biosynthetic process (GO:0009813);; Biological Process: auxin metabolic process (GO:0009850);; Biolo…	--	UDP-glycosyltransferase 86A1 OS=Arabidopsis thaliana GN=UGT86A1 PE=2 SV=1	hypothetical protein PRUPE_ppa020358mg [Prunus persica]
gi_351596971_gb_JP451524.1	0.000175662	-1.73264	down	--	--	--	--	--	Uncharacterized protein isoform 1 [Theobroma cacao]
gi_351596462_gb_JP451018.1	0.000300871	-1.73043	down	--	--	--	--	--	predicted protein [Populus trichocarpa]
gi_351609537_gb_JP463838.1	8.24e-05	-1.73002	down	--	--	--	--	--	PREDICTED: uncharacterized protein LOC101256790 [Solanum lycopersicum]
gi_351622096_gb_JP476397.1	3.41e-06	-1.72093	down	[RTKL]	--	Molecular Function: nucleotide binding (GO:0000166);; Biological Process: polysaccharide catabolic process (GO:0000272);; Molecular Function: protein kinase activity (GO:0004672);; Molecular Function: protein serine/threonine kinase activity (GO:0004674);; Molecular Function: ATP binding (GO:0005524);; Cellular Component: extracellular region (GO:0005576);; Cellular Component: mitochondrion (GO:0…	--	Probable inactive receptor kinase At5g58300 OS=Arabidopsis thaliana GN=At5g58300 PE=1 SV=1	hypothetical protein PRUPE_ppa002812mg [Prunus persica]
gi_351611595_gb_JP465896.1	1.77e-05	-1.71556	down	--	--	Molecular Function: inorganic phosphate transmembrane transporter activity (GO:0005315);; Molecular Function: glucose transmembrane transporter activity (GO:0005355);; Cellular Component: mitochondrion (GO:0005739);; Biological Process: glucose catabolic process (GO:0006007);; Biological Process: purine nucleobase transport (GO:0006863);; Biological Process: vacuole organization (GO:0007033);; Ce…	--	Triose phosphate/phosphate translocator, chloroplastic OS=Flaveria trinervia GN=TPT PE=2 SV=1	predicted protein [Populus trichocarpa]
gi_351603732_gb_JP458088.1	0.000675672	-1.71535	down	--	--	Biological Process: MAPK cascade (GO:0000165);; Molecular Function: sequence-specific DNA binding transcription factor activity (GO:0003700);; Molecular Function: ATP binding (GO:0005524);; Cellular Component: cell wall (GO:0005618);; Cellular Component: nucleus (GO:0005634);; Biological Process: protein targeting to membrane (GO:0006612);; Biological Process: signal transduction (GO:0007165);; B…	--	Ribulose bisphosphate carboxylase/oxygenase activase 1, chloroplastic OS=Larrea tridentata GN=RCA1 PE=1 SV=1	hypothetical protein PRUPE_ppa005158mg [Prunus persica]
gi_351601429_gb_JP455875.1	8.84e-07	-1.71455	down	--	--	--	--	--	hypothetical protein PRUPE_ppa001579mg [Prunus persica]
gi_351623888_gb_JP478189.1	6.83e-10	-1.71201	down	--	--	Biological Process: sulfur amino acid metabolic process (GO:0000096);; Molecular Function: (1->3)-beta-D-glucan binding (GO:0001872);; Biological Process: organelle organization (GO:0006996);; Biological Process: cellular amino acid biosynthetic process (GO:0008652);; Biological Process: serine family amino acid metabolic process (GO:0009069);; Cellular Component: plant-type cell wall (GO:0009505…	--	Glucan endo-1,3-beta-glucosidase-like protein 3 OS=Arabidopsis thaliana GN=At5g08000 PE=1 SV=1	hypothetical protein PRUPE_ppa010695mg [Prunus persica]
gi_351608353_gb_JP462660.1	0.00542856	-1.71153	down	--	--	--	--	Ras-associated and pleckstrin homology domains-containing protein 1 OS=Homo sapiens GN=RAPH1 PE=1 SV=3	hypothetical protein PRUPE_ppa009918mg [Prunus persica]
gi_351597152_gb_JP451702.1	2.02e-05	-1.70755	down	--	--	Molecular Function: structural molecule activity (GO:0005198);; Cellular Component: photosystem I (GO:0009522);; Cellular Component: photosystem II (GO:0009523);; Cellular Component: chloroplast thylakoid membrane (GO:0009535);; Biological Process: response to red or far red light (GO:0009639);; Biological Process: photosynthesis, light harvesting (GO:0009765);; Cellular Component: integral to me…	K08914|0.0|vvi:100260599|hypothetical protein LOC100260599	Chlorophyll a-b binding protein 13, chloroplastic OS=Solanum lycopersicum GN=CAB13 PE=1 SV=1	hypothetical protein PRUPE_ppa009987mg [Prunus persica]
gi_351598843_gb_JP453351.1	0.000467632	-1.70385	down	--	--	Molecular Function: DNA binding (GO:0003677);; Molecular Function: chromatin binding (GO:0003682);; Molecular Function: binding (GO:0005488);; Cellular Component: nucleus (GO:0005634);; Cellular Component: cytoplasm (GO:0005737);; Biological Process: regulation of transcription, DNA-dependent (GO:0006355);; Biological Process: flower development (GO:0009908);; Biological Process: determination of…	--	Transcription factor MYB1R1 OS=Solanum tuberosum PE=2 SV=1	conserved hypothetical protein [Ricinus communis]
gi_351614347_gb_JP468648.1	0.000386777	-1.6971	down	--	--	Molecular Function: sequence-specific DNA binding transcription factor activity (GO:0003700);; Cellular Component: nucleus (GO:0005634);; Biological Process: DNA repair (GO:0006281);; Biological Process: transcription, DNA-dependent (GO:0006351);; Biological Process: circadian rhythm (GO:0007623);; Molecular Function: zinc ion binding (GO:0008270);; Biological Process: response to blue light (GO:…	--	Putative zinc finger protein CONSTANS-LIKE 11 OS=Arabidopsis thaliana GN=COL11 PE=3 SV=2	hypothetical protein PRUPE_ppa009719mg [Prunus persica]
gi_351622632_gb_JP476933.1	0.00270787	-1.69636	down	[RTKL]	--	Molecular Function: nucleotide binding (GO:0000166);; Molecular Function: protein kinase activity (GO:0004672);; Molecular Function: protein serine/threonine kinase activity (GO:0004674);; Molecular Function: calmodulin binding (GO:0005516);; Cellular Component: plasma membrane (GO:0005886);; Biological Process: protein folding (GO:0006457);; Biological Process: oligopeptide transport (GO:0006857…	--	Probable LRR receptor-like serine/threonine-protein kinase At1g29720 OS=Arabidopsis thaliana GN=RFK1 PE=2 SV=3	predicted protein [Populus trichocarpa]
gi_351621599_gb_JP475900.1	4.59e-06	-1.68492	down	--	--	Cellular Component: vacuolar membrane (GO:0005774);; Biological Process: acetyl-CoA metabolic process (GO:0006084);; Biological Process: calcium ion transport (GO:0006816);; Biological Process: Golgi organization (GO:0007030);; Cellular Component: plant-type cell wall (GO:0009505);; Biological Process: response to salt stress (GO:0009651);; Biological Process: plant-type cell wall organization (G…	--	Fasciclin-like arabinogalactan protein 2 OS=Arabidopsis thaliana GN=FLA2 PE=1 SV=1	fasciclin-like arabinogalactan protein 19 [Gossypium hirsutum]
gi_351618594_gb_JP472895.1	0.00959937	-1.68486	down	--	--	Molecular Function: nucleotide binding (GO:0000166);; Biological Process: regulation of alternative nuclear mRNA splicing, via spliceosome (GO:0000381);; Cellular Component: cytoplasmic mRNA processing body (GO:0000932);; Molecular Function: RNA binding (GO:0003723);; Cellular Component: nucleus (GO:0005634);; Biological Process: regulation of translation (GO:0006417);; Biological Process: seed g…	--	Polypyrimidine tract-binding protein homolog 1 OS=Arabidopsis thaliana GN=PTB PE=2 SV=1	hypothetical protein PRUPE_ppa004961mg [Prunus persica]
gi_351615202_gb_JP469503.1	2.57e-13	-1.67803	down	--	--	--	--	--	CCT motif family protein [Theobroma cacao]
gi_351603237_gb_JP457596.1	0.00593773	-1.67753	down	--	--	Cellular Component: chloroplast (GO:0009507);;	--	--	hypothetical protein PRUPE_ppa010089mg [Prunus persica]
gi_351617736_gb_JP472037.1	6.99e-08	-1.6763	down	--	--	--	K14488|2e-51|pop:POPTR_817524|SAUR1	Auxin-induced protein X15 OS=Glycine max PE=2 SV=1	PREDICTED: uncharacterized protein LOC101294039 [Fragaria vesca subsp. vesca]
gi_351614136_gb_JP468437.1	1.11e-05	-1.67111	down	[IQR]	--	Molecular Function: copper ion binding (GO:0005507);; Cellular Component: cytosol (GO:0005829);; Cellular Component: plasma membrane (GO:0005886);; Biological Process: proline biosynthetic process (GO:0006561);; Biological Process: fatty acid metabolic process (GO:0006631);; Biological Process: steroid metabolic process (GO:0008202);; Biological Process: response to heat (GO:0009408);; Biological…	--	Momilactone A synthase OS=Oryza sativa subsp. japonica GN=Os04g0179200 PE=2 SV=1	PREDICTED: momilactone A synthase-like [Glycine max]
gi_351617342_gb_JP471643.1	3.44e-13	-1.6688	down	--	--	Molecular Function: carboxylesterase activity (GO:0004091);;	--	Protein notum homolog OS=Mus musculus GN=Notum PE=2 SV=2	PAE [Litchi chinensis]
gi_351604007_gb_JP458361.1	0.000179504	-1.66697	down	--	--	--	--	--	hypothetical protein VITISV_003517 [Vitis vinifera]
gi_351624193_gb_JP478494.1	0.000873437	-1.65282	down	[RTKL]	--	Molecular Function: guanylate cyclase activity (GO:0004383);; Molecular Function: protein kinase activity (GO:0004672);; Molecular Function: protein serine/threonine kinase activity (GO:0004674);; Molecular Function: binding (GO:0005488);; Cellular Component: plasma membrane (GO:0005886);; Biological Process: cGMP biosynthetic process (GO:0006182);; Biological Process: defense response (GO:000695…	--	Wall-associated receptor kinase-like 22 OS=Arabidopsis thaliana GN=WAKL22 PE=2 SV=1	PREDICTED: wall-associated receptor kinase-like 22-like [Fragaria vesca subsp. vesca]
gi_351619338_gb_JP473639.1	3.64e-08	-1.6486	down	--	--	Cellular Component: extracellular region (GO:0005576);; Cellular Component: plasmodesma (GO:0009506);; Biological Process: gibberellic acid mediated signaling pathway (GO:0009740);; Biological Process: response to sucrose stimulus (GO:0009744);; Biological Process: response to glucose stimulus (GO:0009749);; Biological Process: response to fructose stimulus (GO:0009750);; Biological Process: resp…	--	Gibberellin-regulated protein 4 OS=Arabidopsis thaliana GN=GASA4 PE=1 SV=2	hypothetical protein PRUPE_ppa013692mg [Prunus persica]
gi_351590831_gb_JP449289.1	0.000156234	-1.64762	down	[MG]	--	Biological Process: MAPK cascade (GO:0000165);; Molecular Function: RNA binding (GO:0003723);; Molecular Function: catalytic activity (GO:0003824);; Molecular Function: protein binding (GO:0005515);; Cellular Component: vacuole (GO:0005773);; Cellular Component: peroxisome (GO:0005777);; Cellular Component: Golgi apparatus (GO:0005794);; Cellular Component: ribosome (GO:0005840);; Biological Proc…	--	Chloroplast stem-loop binding protein of 41 kDa b, chloroplastic OS=Arabidopsis thaliana GN=CSP41B PE=1 SV=1	hypothetical protein PRUPE_ppa007071mg [Prunus persica]
gi_351604429_gb_JP458781.1	0.00124736	-1.64233	down	--	--	Cellular Component: plasma membrane (GO:0005886);; Molecular Function: L-proline transmembrane transporter activity (GO:0015193);; Biological Process: proline transport (GO:0015824);; Cellular Component: membrane (GO:0016020);; Biological Process: amino acid import (GO:0043090);; Biological Process: regulation of biological process (GO:0050789);; Biological Process: response to stimulus (GO:00508…	--	Probable proline transporter 2 OS=Oryza sativa subsp. japonica GN=LOC_Os07g01090 PE=2 SV=1	PREDICTED: proline transporter 1-like [Fragaria vesca subsp. vesca]
gi_351622709_gb_JP477010.1	0.00255839	-1.63685	down	--	--	Cellular Component: Golgi apparatus (GO:0005794);; Cellular Component: plasma membrane (GO:0005886);; Biological Process: microtubule nucleation (GO:0007020);; Biological Process: aging (GO:0007568);; Biological Process: regulation of cell size (GO:0008361);; Biological Process: fatty acid catabolic process (GO:0009062);; Cellular Component: plasmodesma (GO:0009506);; Cellular Component: chloropl…	--	Protein TORNADO 2 OS=Arabidopsis thaliana GN=TRN2 PE=1 SV=1	predicted protein [Populus trichocarpa]
gi_351618332_gb_JP472633.1	0.00664276	-1.63616	down	--	--	--	--	Uncharacterized protein At1g08160 OS=Arabidopsis thaliana GN=At1g08160 PE=2 SV=1	PREDICTED: uncharacterized protein At1g08160-like [Fragaria vesca subsp. vesca]
gi_351625546_gb_JP479847.1	6.1e-07	-1.6359	down	--	--	Molecular Function: organic cyclic compound binding (GO:0097159);;	--	Putative AC transposase OS=Zea mays PE=2 SV=2	putative transposase [Cucumis melo]
gi_351617558_gb_JP471859.1	2.33e-08	-1.63541	down	--	--	Biological Process: developmental process involved in reproduction (GO:0003006);; Molecular Function: catalytic activity (GO:0003824);; Molecular Function: binding (GO:0005488);; Biological Process: metabolic process (GO:0008152);; Biological Process: post-embryonic development (GO:0009791);; Biological Process: response to organic substance (GO:0010033);; Biological Process: system development (…	--	Lysine-rich arabinogalactan protein 19 OS=Arabidopsis thaliana GN=AGP19 PE=2 SV=2	PREDICTED: uncharacterized protein LOC101312530 [Fragaria vesca subsp. vesca]
gi_351621904_gb_JP476205.1	0.00229278	-1.63521	down	--	--	Biological Process: transition metal ion transport (GO:0000041);; Cellular Component: extracellular region (GO:0005576);; Cellular Component: mitochondrion (GO:0005739);; Biological Process: pollen tube growth (GO:0009860);; Cellular Component: cytoplasmic membrane-bounded vesicle (GO:0016023);;	--	--	hypothetical protein PRUPE_ppa025448mg [Prunus persica]
gi_351613772_gb_JP468073.1	2.28e-12	-1.63285	down	--	--	--	--	--	predicted protein [Populus trichocarpa]
gi_351603163_gb_JP457522.1	0.00227377	-1.63116	down	[RTKL]	--	Molecular Function: nucleotide binding (GO:0000166);; Molecular Function: protein kinase activity (GO:0004672);; Biological Process: protein phosphorylation (GO:0006468);; Biological Process: signal transduction (GO:0007165);; Biological Process: embryo sac egg cell differentiation (GO:0009560);; Biological Process: abscisic acid mediated signaling pathway (GO:0009738);; Biological Process: seed …	--	G-type lectin S-receptor-like serine/threonine-protein kinase RLK1 OS=Arabidopsis thaliana GN=RLK1 PE=2 SV=2	PREDICTED: G-type lectin S-receptor-like serine/threonine-protein kinase RLK1-like [Fragaria vesca subsp. vesca]
gi_351598412_gb_JP452936.1	0.00453262	-1.62376	down	--	--	--	--	Uncharacterized protein At5g01610 OS=Arabidopsis thaliana GN=At5g01610 PE=1 SV=1	hypothetical protein PRUPE_ppa012348mg [Prunus persica]
gi_351597320_gb_JP451868.1	0.00024591	-1.62074	down	[RTKL]	--	Biological Process: MAPK cascade (GO:0000165);; Molecular Function: nucleotide binding (GO:0000166);; Biological Process: response to reactive oxygen species (GO:0000302);; Molecular Function: protein serine/threonine kinase activity (GO:0004674);; Molecular Function: calmodulin binding (GO:0005516);; Cellular Component: plasma membrane (GO:0005886);; Biological Process: protein phosphorylation (…	--	Cysteine-rich receptor-like protein kinase 42 OS=Arabidopsis thaliana GN=CRK42 PE=2 SV=1	PREDICTED: cysteine-rich receptor-like protein kinase 3-like [Fragaria vesca subsp. vesca]
gi_351619770_gb_JP474071.1	0.000213923	-1.62067	down	--	--	--	--	--	hypothetical protein PRUPE_ppa002007mg [Prunus persica]
gi_351611280_gb_JP465581.1	0.00954236	-1.62013	down	--	--	Biological Process: maltose metabolic process (GO:0000023);; Biological Process: pentose-phosphate shunt (GO:0006098);; Cellular Component: chloroplast thylakoid membrane (GO:0009535);; Biological Process: defense response to fungus, incompatible interaction (GO:0009817);; Cellular Component: chloroplast envelope (GO:0009941);; Biological Process: photosystem II assembly (GO:0010207);; Biological…	--	NAD(P)H-quinone oxidoreductase subunit N OS=Cyanothece sp. (strain PCC 7425 / ATCC 29141) GN=ndhN PE=3 SV=1	PREDICTED: NAD(P)H-quinone oxidoreductase subunit N-like [Cicer arietinum]
gi_351620052_gb_JP474353.1	0.00765244	-1.61857	down	--	--	Biological Process: maltose metabolic process (GO:0000023);; Cellular Component: mitochondrion (GO:0005739);; Biological Process: pentose-phosphate shunt (GO:0006098);; Cellular Component: chloroplast thylakoid membrane (GO:0009535);; Biological Process: defense response to fungus, incompatible interaction (GO:0009817);; Cellular Component: chloroplast envelope (GO:0009941);; Biological Process: …	--	NAD(P)H-quinone oxidoreductase subunit N OS=Synechococcus sp. (strain ATCC 27144 / PCC 6301 / SAUG 1402/1) GN=ndhN PE=3 SV=1	PREDICTED: NAD(P)H-quinone oxidoreductase subunit N-like [Cucumis sativus]
gi_351622388_gb_JP476689.1	0.00771662	-1.61573	down	[KAD]	--	Biological Process: negative regulation of transcription from RNA polymerase II promoter (GO:0000122);; Molecular Function: DNA binding (GO:0003677);; Molecular Function: chromatin binding (GO:0003682);; Molecular Function: sequence-specific DNA binding transcription factor activity (GO:0003700);; Molecular Function: protein binding (GO:0005515);; Cellular Component: nucleus (GO:0005634);; Biolog…	K09422|0.0|vvi:100246639|hypothetical protein LOC100246639	Myb-related protein B OS=Xenopus laevis GN=mybl2 PE=2 SV=2	unnamed protein product [Vitis vinifera]
gi_351598170_gb_JP452702.1	0.000475727	-1.60588	down	--	--	Cellular Component: cytosol (GO:0005829);; Cellular Component: plasma membrane (GO:0005886);; Biological Process: actin filament-based movement (GO:0030048);; Biological Process: Golgi localization (GO:0051645);; Biological Process: mitochondrion localization (GO:0051646);; Biological Process: peroxisome localization (GO:0060151);;	--	Fibrinogen-binding protein OS=Staphylococcus epidermidis GN=fbe PE=1 SV=1	hypothetical protein PRUPE_ppa000751mg [Prunus persica]
gi_351625213_gb_JP479514.1	0.000112097	-1.60396	down	--	--	Molecular Function: enzyme inhibitor activity (GO:0004857);; Cellular Component: extracellular region (GO:0005576);; Cellular Component: cell wall (GO:0005618);; Cellular Component: plant-type cell wall (GO:0009505);; Biological Process: proline transport (GO:0015824);; Cellular Component: cytoplasmic membrane-bounded vesicle (GO:0016023);; Biological Process: regulation of metabolic process (GO:…	K01051|0.0|rcu:RCOM_1179070|Pectinesterase-3 precursor, putative (EC:3.1.1.11)	Probable pectinesterase/pectinesterase inhibitor 39 OS=Arabidopsis thaliana GN=PME39 PE=2 SV=1	hypothetical protein PRUPE_ppa003400mg [Prunus persica]
gi_351620896_gb_JP475197.1	9.58e-06	-1.5944	down	--	--	Molecular Function: calmodulin binding (GO:0005516);; Biological Process: pentose-phosphate shunt (GO:0006098);; Cellular Component: photosystem I (GO:0009522);; Cellular Component: chloroplast thylakoid membrane (GO:0009535);; Cellular Component: chloroplast thylakoid lumen (GO:0009543);; Biological Process: photosynthetic electron transport in photosystem I (GO:0009773);; Biological Process: ph…	K02701|1e-81|pop:POPTR_715775|photosystem I reaction center subunit N PsaN	Photosystem I reaction center subunit N, chloroplastic OS=Arabidopsis thaliana GN=PSAN PE=1 SV=2	predicted protein [Populus trichocarpa]
gi_351628014_gb_JP480897.1	0.000671166	-1.59145	down	--	--	Molecular Function: protein binding (GO:0005515);; Cellular Component: plastid (GO:0009536);; Biological Process: PSII associated light-harvesting complex II catabolic process (GO:0010304);; Biological Process: chlorophyll catabolic process (GO:0015996);;	--	--	putative staygreen protein [Nicotiana tabacum]
gi_351622331_gb_JP476632.1	0.000845227	-1.59144	down	--	--	Biological Process: pentose-phosphate shunt (GO:0006098);; Cellular Component: chloroplast thylakoid membrane (GO:0009535);; Biological Process: chloroplast organization (GO:0009658);; Biological Process: photosynthetic electron transport in photosystem I (GO:0009773);; Biological Process: chlorophyll biosynthetic process (GO:0015995);; Biological Process: positive regulation of transcription, DN…	--	--	predicted protein [Populus trichocarpa]
gi_351617071_gb_JP471372.1	6.88e-09	-1.58903	down	--	--	--	--	--	PREDICTED: uncharacterized protein LOC101306150 [Fragaria vesca subsp. vesca]
gi_351623112_gb_JP477413.1	2.73e-07	-1.58784	down	--	--	Molecular Function: calcium ion binding (GO:0005509);; Biological Process: nucleobase-containing compound metabolic process (GO:0006139);; Cellular Component: photosystem II (GO:0009523);; Cellular Component: chloroplast thylakoid lumen (GO:0009543);; Cellular Component: oxygen evolving complex (GO:0009654);; Biological Process: photosystem II assembly (GO:0010207);; Biological Process: mRNA modi…	--	PsbP-like protein 2, chloroplastic OS=Arabidopsis thaliana GN=PPL2 PE=1 SV=2	unknown [Lotus japonicus]
gi_351603805_gb_JP458160.1	0.00362006	-1.58617	down	--	--	Cellular Component: extracellular region (GO:0005576);; Cellular Component: plasma membrane (GO:0005886);; Cellular Component: plasmodesma (GO:0009506);; Biological Process: heterochromatin assembly (GO:0031507);; Biological Process: positive regulation of cell cycle (GO:0045787);;	--	--	PREDICTED: uncharacterized protein LOC101314155 [Fragaria vesca subsp. vesca]
gi_351613513_gb_JP467814.1	2.44e-05	-1.58561	down	--	--	Cellular Component: hyphal tip (GO:0001411);; Molecular Function: protein binding (GO:0005515);; Cellular Component: cell wall (GO:0005618);; Biological Process: defense response (GO:0006952);; Biological Process: catabolic process (GO:0009056);; Cellular Component: membrane (GO:0016020);; Molecular Function: hydrolase activity (GO:0016787);; Biological Process: regulation of anatomical structure…	--	Protein cappuccino OS=Drosophila melanogaster GN=capu PE=1 SV=2	Uncharacterized protein TCM_021304 [Theobroma cacao]
gi_351625727_gb_JP480028.1	0.00103348	-1.57071	down	--	--	Biological Process: MAPK cascade (GO:0000165);; Biological Process: response to molecule of bacterial origin (GO:0002237);; Biological Process: respiratory burst involved in defense response (GO:0002679);; Cellular Component: nucleus (GO:0005634);; Biological Process: regulation of transcription, DNA-dependent (GO:0006355);; Biological Process: protein targeting to membrane (GO:0006612);; Biologi…	K14487|0.0|rcu:RCOM_0032550|Indole-3-acetic acid-amido synthetase GH3.6, putative	Indole-3-acetic acid-amido synthetase GH3.6 OS=Arabidopsis thaliana GN=GH3.6 PE=1 SV=1	indole-3-acetic acid amido synthetase [Morus alba var. multicaulis]
gi_351596646_gb_JP451202.1	0.000886677	-1.5707	down	--	--	--	--	--	Glucose-6-phosphate/phosphate translocator-related [Theobroma cacao]
gi_351622853_gb_JP477154.1	2.02e-07	-1.56957	down	[OC]	--	Biological Process: nuclear division (GO:0000280);; Molecular Function: enzyme inhibitor activity (GO:0004857);; Cellular Component: cell wall (GO:0005618);; Cellular Component: mitochondrion (GO:0005739);; Cellular Component: vacuole (GO:0005773);; Cellular Component: Golgi apparatus (GO:0005794);; Cellular Component: cytosol (GO:0005829);; Cellular Component: plasma membrane (GO:0005886);; Biol…	K03671|4e-44|vvi:100246832|hypothetical protein LOC100246832	Thioredoxin H2 OS=Arabidopsis thaliana GN=TRX2 PE=2 SV=2	PREDICTED: thioredoxin H2-like [Fragaria vesca subsp. vesca]
gi_351591514_gb_JP449961.1	8.8e-09	-1.56174	down	--	--	Biological Process: double-strand break repair via homologous recombination (GO:0000724);; Biological Process: response to gamma radiation (GO:0010332);; Molecular Function: organic cyclic compound binding (GO:0097159);;	--	--	Gamma-irradiation and mitomycin c induced 1, putative isoform 1 [Theobroma cacao]
gi_351618983_gb_JP473284.1	0.00127077	-1.56026	down	--	--	Molecular Function: nucleotide binding (GO:0000166);; Molecular Function: RNA binding (GO:0003723);; Cellular Component: nucleus (GO:0005634);; Cellular Component: cytoplasm (GO:0005737);; Biological Process: RNA processing (GO:0006396);; Biological Process: gene expression (GO:0010467);; Biological Process: RNA metabolic process (GO:0016070);; Molecular Function: oxidoreductase activity (GO:0016…	--	La-related protein 7 OS=Macaca fascicularis GN=LARP7 PE=2 SV=1	PREDICTED: uncharacterized protein LOC101311941 [Fragaria vesca subsp. vesca]
gi_351628572_gb_JP481455.1	0.00016149	-1.5592	down	--	--	Biological Process: cell cycle process (GO:0022402);;	--	F-box/FBD/LRR-repeat protein At2g26030 OS=Arabidopsis thaliana GN=At2g26030 PE=2 SV=2	hypothetical protein PRUPE_ppa019570mg [Prunus persica]
gi_351615743_gb_JP470044.1	0.00513839	-1.55417	down	--	--	Molecular Function: DNA binding (GO:0003677);; Biological Process: pentose-phosphate shunt (GO:0006098);; Biological Process: rRNA processing (GO:0006364);; Cellular Component: plastid chromosome (GO:0009508);; Cellular Component: chloroplast thylakoid membrane (GO:0009535);; Biological Process: response to abscisic acid stimulus (GO:0009737);; Biological Process: photosynthetic electron transpor…	--	Thylakoid membrane phosphoprotein 14 kDa, chloroplastic OS=Arabidopsis thaliana GN=TMP14 PE=1 SV=2	PREDICTED: thylakoid membrane phosphoprotein 14 kDa, chloroplastic [Vitis vinifera]
gi_351619722_gb_JP474023.1	0.00211832	-1.55385	down	--	--	Molecular Function: protein binding (GO:0005515);; Cellular Component: plasma membrane (GO:0005886);; Biological Process: glycerol ether metabolic process (GO:0006662);; Biological Process: response to oxidative stress (GO:0006979);; Biological Process: cell communication (GO:0007154);; Molecular Function: electron carrier activity (GO:0009055);; Biological Process: response to heat (GO:0009408);…	--	Thioredoxin-like protein CDSP32, chloroplastic OS=Arabidopsis thaliana GN=CDSP32 PE=1 SV=1	conserved hypothetical protein [Ricinus communis]
gi_351596082_gb_JP450640.1	1.41e-07	-1.55071	down	--	--	Molecular Function: nucleic acid binding (GO:0003676);;	--	--	hypothetical protein PRUPE_ppa001720mg [Prunus persica]
gi_351615181_gb_JP469482.1	0.00265375	-1.54699	down	--	--	--	K09284|4e-21|vvi:100246815|hypothetical protein LOC100246815	AP2-like ethylene-responsive transcription factor TOE3 OS=Arabidopsis thaliana GN=TOE3 PE=2 SV=1	unnamed protein product [Vitis vinifera]
gi_351628716_gb_JP481599.1	0.000413804	-1.54361	down	--	--	Molecular Function: nucleic acid binding (GO:0003676);; Cellular Component: cell part (GO:0044464);;	--	Zinc finger CCCH domain-containing protein 18 OS=Arabidopsis thaliana GN=At2g05160 PE=2 SV=1	hypothetical protein PRUPE_ppa003564mg [Prunus persica]
gi_351603970_gb_JP458325.1	0.00012509	-1.53873	down	--	--	--	--	CBS domain-containing protein CBSX5 OS=Arabidopsis thaliana GN=CBSX5 PE=2 SV=2	CBS domain-containing protein [Theobroma cacao]
gi_351613641_gb_JP467942.1	0.000507879	-1.53655	down	--	--	--	--	Uncharacterized serine-rich protein C215.13 OS=Schizosaccharomyces pombe (strain 972 / ATCC 24843) GN=SPBC215.13 PE=1 SV=1	PREDICTED: uncharacterized protein LOC100242015 isoform 1 [Vitis vinifera]
gi_351622315_gb_JP476616.1	1.49e-06	-1.53376	down	--	--	Molecular Function: two-component response regulator activity (GO:0000156);; Molecular Function: DNA binding (GO:0003677);; Molecular Function: sequence-specific DNA binding transcription factor activity (GO:0003700);; Cellular Component: nucleus (GO:0005634);; Cellular Component: mitochondrion (GO:0005739);; Biological Process: DNA repair (GO:0006281);; Biological Process: circadian rhythm (GO:0…	--	Protein CHLOROPLAST IMPORT APPARATUS 2 OS=Arabidopsis thaliana GN=CIA2 PE=2 SV=1	PREDICTED: uncharacterized protein LOC101310098 [Fragaria vesca subsp. vesca]
gi_351604320_gb_JP458672.1	0.000526213	-1.53212	down	--	--	Molecular Function: binding (GO:0005488);; Biological Process: defense response (GO:0006952);; Cellular Component: cell part (GO:0044464);;	--	Disease resistance protein RPM1 OS=Arabidopsis thaliana GN=RPM1 PE=1 SV=1	cc-nbs-lrr resistance protein [Populus trichocarpa]
gi_351602169_gb_JP456600.1	0.000198197	-1.53142	down	--	--	Cellular Component: photosystem I (GO:0009522);; Cellular Component: chloroplast thylakoid membrane (GO:0009535);; Biological Process: photosynthesis (GO:0015979);; Cellular Component: integral to membrane (GO:0016021);; Molecular Function: chlorophyll binding (GO:0016168);; Biological Process: cysteine biosynthetic process (GO:0019344);; Biological Process: cellular cation homeostasis (GO:003000…	K02698|2e-80|vvi:100261762|hypothetical protein LOC100261762	Photosystem I reaction center subunit psaK, chloroplastic OS=Arabidopsis thaliana GN=PSAK PE=2 SV=2	PREDICTED: photosystem I reaction center subunit psaK, chloroplastic [Vitis vinifera]
gi_351606055_gb_JP460391.1	0.000879295	-1.52887	down	--	--	Molecular Function: binding (GO:0005488);;	--	Uncharacterized protein DDB_G0271670 OS=Dictyostelium discoideum GN=DDB_G0271670 PE=4 SV=1	hypothetical protein PRUPE_ppa010050mg [Prunus persica]
gi_351604058_gb_JP458412.1	0.00596857	-1.52629	down	[RTKL]	--	Biological Process: transition metal ion transport (GO:0000041);; Molecular Function: protein kinase activity (GO:0004672);; Molecular Function: protein binding (GO:0005515);; Cellular Component: vacuole (GO:0005773);; Cellular Component: plasma membrane (GO:0005886);; Biological Process: response to abscisic acid stimulus (GO:0009737);; Biological Process: response to salicylic acid stimulus (GO…	--	Cysteine-rich receptor-like protein kinase 10 OS=Arabidopsis thaliana GN=CRK10 PE=1 SV=3	ATP binding protein, putative [Ricinus communis]
gi_351618718_gb_JP473019.1	7.69e-08	-1.52515	down	--	--	Cellular Component: nucleus (GO:0005634);; Biological Process: xylem development (GO:0010089);; Biological Process: cell wall macromolecule metabolic process (GO:0044036);;	--	Protein Brevis radix-like 2 OS=Arabidopsis thaliana GN=BRXL2 PE=2 SV=1	PREDICTED: protein Brevis radix-like 2 isoform 2 [Vitis vinifera]
gi_351624182_gb_JP478483.1	2.23e-10	-1.52264	down	--	--	Biological Process: microtubule bundle formation (GO:0001578);; Cellular Component: nucleus (GO:0005634);; Biological Process: establishment or maintenance of cell polarity (GO:0007163);; Biological Process: multidimensional cell growth (GO:0009825);; Biological Process: root morphogenesis (GO:0010015);; Biological Process: circumnutation (GO:0010031);; Biological Process: trichome branching (GO:…	--	Protein WVD2-like 1 OS=Arabidopsis thaliana GN=WDL1 PE=2 SV=1	PREDICTED: uncharacterized protein LOC101300956 [Fragaria vesca subsp. vesca]
gi_351617299_gb_JP471600.1	0.00162048	-1.52131	down	[RTKL]	--	Molecular Function: ATP binding (GO:0005524);; Cellular Component: nucleus (GO:0005634);; Cellular Component: nucleolus (GO:0005730);; Cellular Component: cytosol (GO:0005829);; Cellular Component: plasma membrane (GO:0005886);; Biological Process: mRNA processing (GO:0006397);; Biological Process: protein phosphorylation (GO:0006468);; Molecular Function: RNA polymerase II carboxy-terminal domai…	--	Probable serine/threonine-protein kinase At1g54610 OS=Arabidopsis thaliana GN=At1g54610 PE=1 SV=1	hypothetical protein PRUPE_ppa002234mg [Prunus persica]
gi_351611666_gb_JP465967.1	7.33e-05	-1.5174	down	--	--	Biological Process: microtubule cytoskeleton organization (GO:0000226);; Biological Process: mitotic cell cycle (GO:0000278);; Biological Process: cytokinesis by cell plate formation (GO:0000911);; Molecular Function: protein binding (GO:0005515);; Cellular Component: nucleus (GO:0005634);; Cellular Component: nuclear envelope (GO:0005635);; Cellular Component: plasma membrane (GO:0005886);; Biol…	--	Interactor of constitutive active ROPs 1 OS=Arabidopsis thaliana GN=ICR1 PE=1 SV=1	hypothetical protein PRUPE_ppa007058mg [Prunus persica]
gi_351595944_gb_JP450504.1	0.000240001	-1.51336	down	[IQR]	--	Molecular Function: 3-hydroxyacyl-CoA dehydrogenase activity (GO:0003857);; Molecular Function: estradiol 17-beta-dehydrogenase activity (GO:0004303);; Molecular Function: copper ion binding (GO:0005507);; Molecular Function: protein binding (GO:0005515);; Cellular Component: mitochondrial matrix (GO:0005759);; Cellular Component: cytosol (GO:0005829);; Cellular Component: plasma membrane (GO:000…	--	Momilactone A synthase OS=Oryza sativa subsp. japonica GN=Os04g0179200 PE=2 SV=1	PREDICTED: momilactone A synthase-like [Fragaria vesca subsp. vesca]
gi_351598403_gb_JP452927.1	0.00223662	-1.5097	down	--	--	--	--	--	PREDICTED: uncharacterized protein LOC101246561 [Solanum lycopersicum]
gi_351622082_gb_JP476383.1	1.15e-09	-1.50565	down	--	--	Biological Process: polysaccharide biosynthetic process (GO:0000271);; Molecular Function: protein binding (GO:0005515);; Cellular Component: nucleus (GO:0005634);; Cellular Component: plasma membrane (GO:0005886);; Cellular Component: integral to plasma membrane (GO:0005887);; Cellular Component: cell cortex (GO:0005938);; Biological Process: water transport (GO:0006833);; Biological Process: Go…	--	Protein WALLS ARE THIN 1 OS=Arabidopsis thaliana GN=WAT1 PE=1 SV=1	Walls Are Thin 1 [Theobroma cacao]
gi_351614127_gb_JP468428.1	0.00134882	-1.50203	down	--	--	Cellular Component: extracellular region (GO:0005576);; Cellular Component: cell wall (GO:0005618);; Cellular Component: cytoplasm (GO:0005737);; Biological Process: oligopeptide transport (GO:0006857);; Biological Process: response to salt stress (GO:0009651);; Cellular Component: cytoplasmic membrane-bounded vesicle (GO:0016023);; Molecular Function: manganese ion binding (GO:0030145);; Cellula…	--	Germin-like protein subfamily 1 member 20 OS=Arabidopsis thaliana GN=GLP5A PE=1 SV=1	hypothetical protein PRUPE_ppa016284mg [Prunus persica]
gi_351621991_gb_JP476292.1	0.00372143	-1.50098	down	--	--	Molecular Function: structural constituent of cell wall (GO:0005199);; Cellular Component: extracellular region (GO:0005576);; Cellular Component: cytosol (GO:0005829);; Biological Process: syncytium formation (GO:0006949);; Cellular Component: plant-type cell wall (GO:0009505);; Cellular Component: plasmodesma (GO:0009506);; Cellular Component: chloroplast (GO:0009507);; Biological Process: resp…	--	Expansin-A8 OS=Arabidopsis thaliana GN=EXPA8 PE=2 SV=1	expansin 5 [Ziziphus jujuba]
gi_351595751_gb_JP450316.1	0.000640604	-1.49858	down	--	--	Molecular Function: ubiquitin-protein ligase activity (GO:0004842);; Molecular Function: ATP binding (GO:0005524);; Cellular Component: nucleoplasm (GO:0005654);; Cellular Component: cytoplasm (GO:0005737);; Cellular Component: cytosol (GO:0005829);; Cellular Component: plasma membrane (GO:0005886);; Biological Process: postreplication repair (GO:0006301);; Biological Process: fatty acid beta-oxi…	--	Ubiquitin-conjugating enzyme E2 10 OS=Arabidopsis thaliana GN=UBC10 PE=1 SV=1	PREDICTED: ubiquitin-conjugating enzyme E2 10-like [Glycine max]
gi_351595770_gb_JP450335.1	1.6e-05	-1.49857	down	--	--	Biological Process: maltose metabolic process (GO:0000023);; Molecular Function: calcium ion binding (GO:0005509);; Biological Process: pentose-phosphate shunt (GO:0006098);; Biological Process: rRNA processing (GO:0006364);; Cellular Component: chloroplast thylakoid membrane (GO:0009535);; Cellular Component: chloroplast thylakoid lumen (GO:0009543);; Biological Process: response to blue light (…	--	PsbP domain-containing protein 3, chloroplastic OS=Arabidopsis thaliana GN=PPD3 PE=1 SV=2	PREDICTED: psbP domain-containing protein 3, chloroplastic-like [Fragaria vesca subsp. vesca]
gi_351628198_gb_JP481081.1	0.00564893	-1.496	down	[RTKL]	--	Biological Process: response to molecule of bacterial origin (GO:0002237);; Molecular Function: protein kinase activity (GO:0004672);; Molecular Function: transmembrane receptor protein tyrosine kinase activity (GO:0004714);; Molecular Function: protein binding (GO:0005515);; Molecular Function: ATP binding (GO:0005524);; Biological Process: protein phosphorylation (GO:0006468);; Biological Proce…	--	Protein LYK2 OS=Arabidopsis thaliana GN=LYK2 PE=2 SV=1	hypothetical protein PRUPE_ppa024632mg, partial [Prunus persica]
gi_351606834_gb_JP461159.1	0.00205566	-1.49575	down	--	--	Biological Process: response to hypoxia (GO:0001666);; Cellular Component: extracellular region (GO:0005576);; Cellular Component: Golgi apparatus (GO:0005794);; Cellular Component: plant-type cell wall (GO:0009505);; Biological Process: response to mechanical stimulus (GO:0009612);; Biological Process: growth (GO:0040007);;	--	--	EXORDIUM like 1 [Theobroma cacao]
gi_351618440_gb_JP472741.1	0.00686581	-1.49151	down	[RTKL]	--	Molecular Function: protein kinase activity (GO:0004672);; Molecular Function: ATP binding (GO:0005524);; Cellular Component: extracellular region (GO:0005576);; Cellular Component: cytosol (GO:0005829);; Cellular Component: plasma membrane (GO:0005886);; Biological Process: cellular glucan metabolic process (GO:0006073);; Biological Process: protein phosphorylation (GO:0006468);; Biological Proc…	--	Putative kinase-like protein TMKL1 OS=Arabidopsis thaliana GN=TMKL1 PE=1 SV=1	Nodulation receptor kinase precursor, putative [Ricinus communis]
gi_351597300_gb_JP451848.1	2.75e-08	-1.48469	down	--	--	Biological Process: MAPK cascade (GO:0000165);; Molecular Function: phosphatidylinositol phospholipase C activity (GO:0004435);; Molecular Function: phospholipase C activity (GO:0004629);; Molecular Function: signal transducer activity (GO:0004871);; Molecular Function: binding (GO:0005488);; Molecular Function: calcium ion binding (GO:0005509);; Cellular Component: cytoplasm (GO:0005737);; Cellu…	K05857|0.0|vvi:100255373|hypothetical protein LOC100255373	Phosphoinositide phospholipase C 4 OS=Arabidopsis thaliana GN=PLC4 PE=2 SV=2	Phosphatidylinositol-speciwc phospholipase C4 [Theobroma cacao]
gi_351617115_gb_JP471416.1	0.00843282	-1.48233	down	--	--	Biological Process: microtubule bundle formation (GO:0001578);; Biological Process: establishment or maintenance of cell polarity (GO:0007163);; Biological Process: multidimensional cell growth (GO:0009825);; Biological Process: root morphogenesis (GO:0010015);; Biological Process: circumnutation (GO:0010031);; Biological Process: trichome branching (GO:0010091);; Cellular Component: cortical mic…	--	Protein WAVE-DAMPENED 2 OS=Arabidopsis thaliana GN=WVD2 PE=2 SV=1	hypothetical protein PRUPE_ppa015013mg [Prunus persica]
gi_351623704_gb_JP478005.1	0.00571801	-1.48128	down	[RTKL]	--	Molecular Function: protein kinase activity (GO:0004672);; Biological Process: glucose catabolic process (GO:0006007);; Biological Process: ion transport (GO:0006811);; Biological Process: response to osmotic stress (GO:0006970);; Biological Process: chromosome segregation (GO:0007059);; Biological Process: meiosis I (GO:0007127);; Cellular Component: plasmodesma (GO:0009506);; Cellular Component…	--	Receptor-like protein kinase FERONIA OS=Arabidopsis thaliana GN=FER PE=1 SV=1	Malectin/receptor-like protein kinase family protein, putative [Theobroma cacao]
gi_351608009_gb_JP462320.1	4.76e-05	-1.4746	down	--	--	--	--	--	hypothetical protein PRUPE_ppa016002mg [Prunus persica]
gi_351597319_gb_JP451867.1	7.89e-05	-1.47297	down	[RTKL]	--	Biological Process: immune system process (GO:0002376);; Molecular Function: protein serine/threonine kinase activity (GO:0004674);; Cellular Component: nucleus (GO:0005634);; Cellular Component: vacuole (GO:0005773);; Cellular Component: plasma membrane (GO:0005886);; Biological Process: defense response (GO:0006952);; Biological Process: cell communication (GO:0007154);; Cellular Component: pla…	--	G-type lectin S-receptor-like serine/threonine-protein kinase At4g03230 OS=Arabidopsis thaliana GN=At4g03230 PE=3 SV=3	PREDICTED: receptor-like serine/threonine-protein kinase SD1-8-like [Fragaria vesca subsp. vesca]
gi_351597406_gb_JP451952.1	1.85e-06	-1.47285	down	--	--	Molecular Function: nucleic acid binding (GO:0003676);; Molecular Function: ionotropic glutamate receptor activity (GO:0004970);; Molecular Function: extracellular-glutamate-gated ion channel activity (GO:0005234);; Biological Process: ion transport (GO:0006811);; Molecular Function: zinc ion binding (GO:0008270);; Biological Process: DNA integration (GO:0015074);; Cellular Component: integral to…	--	Retrovirus-related Pol polyprotein from transposon TNT 1-94 OS=Nicotiana tabacum PE=2 SV=1	hypothetical protein VITISV_025855 [Vitis vinifera]
gi_351619530_gb_JP473831.1	0.00326017	-1.46761	down	--	--	Biological Process: microtubule cytoskeleton organization (GO:0000226);; Biological Process: cytokinesis by cell plate formation (GO:0000911);; Biological Process: DNA metabolic process (GO:0006259);; Biological Process: methylation-dependent chromatin silencing (GO:0006346);; Biological Process: protein complex assembly (GO:0006461);; Biological Process: cytoskeleton organization (GO:0007010);; …	--	Protein TPX2 OS=Arabidopsis thaliana GN=TPX2 PE=1 SV=1	PREDICTED: uncharacterized protein LOC101313808 [Fragaria vesca subsp. vesca]
gi_351591524_gb_JP449971.1	0.00799304	-1.46717	down	--	--	Cellular Component: photosystem II (GO:0009523);; Cellular Component: chloroplast thylakoid membrane (GO:0009535);; Biological Process: photosynthesis (GO:0015979);;	--	--	conserved hypothetical protein [Ricinus communis]
gi_351627805_gb_JP480688.1	4.26e-08	-1.46592	down	--	--	Cellular Component: plasma membrane (GO:0005886);;	--	--	predicted protein [Populus trichocarpa]
gi_351617184_gb_JP471485.1	8.06e-06	-1.4583	down	--	--	Biological Process: cell morphogenesis involved in differentiation (GO:0000904);; Molecular Function: catalytic activity (GO:0003824);; Molecular Function: protein binding (GO:0005515);; Biological Process: signal transduction (GO:0007165);; Cellular Component: plant-type cell wall (GO:0009505);; Cellular Component: plasmodesma (GO:0009506);; Biological Process: response to hormone stimulus (GO:0…	--	Uncharacterized protein At4g06744 OS=Arabidopsis thaliana GN=At4g06744 PE=2 SV=1	LRR-family protein [Theobroma cacao]
gi_351597076_gb_JP451628.1	0.00421918	-1.45818	down	--	--	Biological Process: rRNA processing (GO:0006364);; Cellular Component: PSII associated light-harvesting complex II (GO:0009517);; Cellular Component: chloroplast stromal thylakoid (GO:0009533);; Biological Process: response to blue light (GO:0009637);; Biological Process: response to high light intensity (GO:0009644);; Biological Process: response to sucrose stimulus (GO:0009744);; Biological Pro…	K08916|0.0|pop:POPTR_743910|Lhcb5	Chlorophyll a-b binding protein CP26, chloroplastic OS=Arabidopsis thaliana GN=LHCB5 PE=2 SV=1	light-harvesting complex II protein Lhcb5 [Populus trichocarpa]
gi_351623929_gb_JP478230.1	0.000188379	-1.45031	down	--	--	Cellular Component: extracellular region (GO:0005576);; Cellular Component: plant-type cell wall (GO:0009505);; Biological Process: response to karrikin (GO:0080167);;	--	--	hypothetical protein PRUPE_ppa007452mg [Prunus persica]
gi_351628819_gb_JP481702.1	9.85e-06	-1.44988	down	--	--	Molecular Function: nucleotide binding (GO:0000166);; Biological Process: pentose-phosphate shunt (GO:0006098);; Biological Process: rRNA processing (GO:0006364);; Biological Process: circadian rhythm (GO:0007623);; Cellular Component: plastid chromosome (GO:0009508);; Cellular Component: plastid envelope (GO:0009526);; Cellular Component: chloroplast thylakoid membrane (GO:0009535);; Biological …	--	Protein TIC 62, chloroplastic OS=Pisum sativum GN=TIC62 PE=1 SV=2	hypothetical protein PRUPE_ppa004225mg [Prunus persica]
gi_351599047_gb_JP453551.1	8.97e-09	-1.44953	down	--	--	Molecular Function: nucleic acid binding (GO:0003676);;	--	--	hypothetical protein PRUPE_ppa001720mg [Prunus persica]
gi_351620761_gb_JP475062.1	0.00661108	-1.44914	down	--	--	Biological Process: polysaccharide biosynthetic process (GO:0000271);; Biological Process: polysaccharide catabolic process (GO:0000272);; Molecular Function: sequence-specific DNA binding transcription factor activity (GO:0003700);; Molecular Function: alpha-amylase activity (GO:0004556);; Molecular Function: calcium ion binding (GO:0005509);; Cellular Component: extracellular region (GO:0005576…	--	Beta-amylase OS=Trifolium repens GN=BMY1 PE=2 SV=1	PREDICTED: beta-amylase-like [Fragaria vesca subsp. vesca]
gi_351621674_gb_JP475975.1	9.97e-05	-1.447	down	--	--	Biological Process: very long-chain fatty acid metabolic process (GO:0000038);; Biological Process: phosphatidylglycerol biosynthetic process (GO:0006655);; Cellular Component: chloroplast thylakoid membrane (GO:0009535);; Cellular Component: photosystem II reaction center (GO:0009539);; Cellular Component: chloroplast stroma (GO:0009570);; Cellular Component: oxygen evolving complex (GO:0009654)…	K08903|2e-94|vvi:100260011|hypothetical protein LOC100260011	Photosystem II reaction center PSB28 protein, chloroplastic OS=Oryza sativa subsp. japonica GN=PSB28 PE=2 SV=2	hypothetical protein PRUPE_ppa012196mg [Prunus persica]
gi_351618007_gb_JP472308.1	0.00105276	-1.43976	down	--	--	Cellular Component: mitochondrion (GO:0005739);; Biological Process: pentose-phosphate shunt (GO:0006098);; Biological Process: rRNA processing (GO:0006364);; Cellular Component: chloroplast thylakoid (GO:0009534);; Cellular Component: chloroplast inner membrane (GO:0009706);; Biological Process: thylakoid membrane organization (GO:0010027);; Biological Process: photosystem II assembly (GO:001020…	--	--	Uncharacterized protein TCM_005085 [Theobroma cacao]
gi_351604266_gb_JP458619.1	5.3e-06	-1.43511	down	--	--	Molecular Function: carboxylesterase activity (GO:0004091);; Cellular Component: cytoplasm (GO:0005737);; Biological Process: defense response, incompatible interaction (GO:0009814);; Biological Process: response to organic substance (GO:0010033);; Biological Process: leaf senescence (GO:0010150);; Biological Process: monocarboxylic acid metabolic process (GO:0032787);; Biological Process: chloro…	--	Methylesterase 18 OS=Arabidopsis thaliana GN=MES18 PE=2 SV=1	hypothetical protein PRUPE_ppa009635mg [Prunus persica]
gi_351602590_gb_JP457011.1	6.96e-05	-1.4292	down	--	--	Cellular Component: nucleus (GO:0005634);; Cellular Component: cytoplasm (GO:0005737);; Cellular Component: plasma membrane (GO:0005886);; Molecular Function: O-methyltransferase activity (GO:0008171);; Cellular Component: plasmodesma (GO:0009506);; Biological Process: lignin biosynthetic process (GO:0009809);; Molecular Function: luteolin O-methyltransferase activity (GO:0030744);; Molecular Fun…	--	Flavone 3&apos;-O-methyltransferase 1 OS=Arabidopsis thaliana GN=OMT1 PE=1 SV=1	O-methyltransferase OMT1 [Vitis vinifera]
gi_351624862_gb_JP479163.1	0.00482627	-1.42742	down	[RTKL]	--	Biological Process: activation of MAPKK activity (GO:0000186);; Molecular Function: MAP kinase kinase kinase activity (GO:0004709);; Molecular Function: ATP binding (GO:0005524);; Cellular Component: plasma membrane (GO:0005886);; Biological Process: cellular aromatic compound metabolic process (GO:0006725);; Biological Process: cation transport (GO:0006812);; Biological Process: anion transport …	--	Probable LRR receptor-like serine/threonine-protein kinase At5g48740 OS=Arabidopsis thaliana GN=At5g48740 PE=2 SV=1	hypothetical protein PRUPE_ppa001123mg [Prunus persica]
gi_351622811_gb_JP477112.1	0.0019397	-1.42687	down	--	--	Biological Process: rRNA processing (GO:0006364);; Cellular Component: chloroplast thylakoid membrane (GO:0009535);; Biological Process: response to blue light (GO:0009637);; Biological Process: chloroplast relocation (GO:0009902);; Cellular Component: chloroplast envelope (GO:0009941);; Biological Process: thylakoid membrane organization (GO:0010027);; Biological Process: response to red light (…	--	--	PREDICTED: uncharacterized protein LOC100788940 [Glycine max]
gi_351625023_gb_JP479324.1	1.65e-05	-1.42587	down	--	--	Molecular Function: serine-type carboxypeptidase activity (GO:0004185);; Cellular Component: extracellular region (GO:0005576);; Cellular Component: extracellular space (GO:0005615);; Cellular Component: cell wall (GO:0005618);; Cellular Component: vacuole (GO:0005773);; Biological Process: proteolysis (GO:0006508);; Cellular Component: plant-type cell wall (GO:0009505);; Cellular Component: plas…	K13289|0.0|pop:POPTR_551354|hypothetical protein	Serine carboxypeptidase-like 42 OS=Arabidopsis thaliana GN=SCPL42 PE=2 SV=1	PREDICTED: serine carboxypeptidase-like 42-like [Fragaria vesca subsp. vesca]
gi_351596344_gb_JP450901.1	5.09e-09	-1.42081	down	--	--	Molecular Function: protein binding (GO:0005515);; Molecular Function: ATP binding (GO:0005524);; Cellular Component: nucleus (GO:0005634);; Cellular Component: vacuole (GO:0005773);; Cellular Component: plasma membrane (GO:0005886);; Biological Process: ATP catabolic process (GO:0006200);; Biological Process: ATP biosynthetic process (GO:0006754);; Biological Process: cation transport (GO:000681…	K01535|0.0|vvi:100242786|hypothetical protein LOC100242786	Plasma membrane ATPase 4 OS=Nicotiana plumbaginifolia GN=PMA4 PE=1 SV=1	hypothetical protein VITISV_014422 [Vitis vinifera]
gi_351603705_gb_JP458061.1	2.18e-08	-1.41828	down	[RTKL]	--	Molecular Function: transmembrane receptor protein serine/threonine kinase activity (GO:0004675);; Molecular Function: non-membrane spanning protein tyrosine kinase activity (GO:0004715);; Molecular Function: protein binding (GO:0005515);; Molecular Function: ATP binding (GO:0005524);; Cellular Component: extracellular region (GO:0005576);; Cellular Component: plasma membrane (GO:0005886);; Biolo…	--	Probable receptor protein kinase TMK1 OS=Arabidopsis thaliana GN=TMK1 PE=1 SV=1	hypothetical protein PRUPE_ppa000942mg [Prunus persica]
gi_351597439_gb_JP451985.1	0.00171656	-1.41784	down	--	--	Molecular Function: calcium ion binding (GO:0005509);; Cellular Component: chloroplast thylakoid membrane (GO:0009535);; Cellular Component: chloroplast thylakoid lumen (GO:0009543);; Cellular Component: chloroplast stroma (GO:0009570);; Cellular Component: oxygen evolving complex (GO:0009654);; Biological Process: photorespiration (GO:0009853);; Biological Process: photosynthesis (GO:0015979);; …	K08901|1e-115|vvi:100240959|hypothetical protein LOC100240959	Oxygen-evolving enhancer protein 3-2, chloroplastic OS=Arabidopsis thaliana GN=PSBQ2 PE=1 SV=2	hypothetical protein PRUPE_ppa010884mg [Prunus persica]
gi_351623413_gb_JP477714.1	0.00713295	-1.41637	down	--	--	Molecular Function: carboxylesterase activity (GO:0004091);; Molecular Function: binding (GO:0005488);; Cellular Component: cytosol (GO:0005829);; Biological Process: defense response (GO:0006952);; Biological Process: metabolic process (GO:0008152);; Biological Process: response to abiotic stimulus (GO:0009628);; Biological Process: gibberellic acid mediated signaling pathway (GO:0009740);; Biol…	--	Probable carboxylesterase 8 OS=Arabidopsis thaliana GN=CXE8 PE=2 SV=1	PREDICTED: probable carboxylesterase 8-like [Fragaria vesca subsp. vesca]
gi_351624533_gb_JP478834.1	0.000586708	-1.41533	down	--	--	Molecular Function: copper ion binding (GO:0005507);; Cellular Component: vacuolar lumen (GO:0005775);; Cellular Component: chloroplast (GO:0009507);; Cellular Component: thylakoid (GO:0009579);; Molecular Function: oxidoreductase activity (GO:0016491);; Molecular Function: aureusidin synthase activity (GO:0033793);; Biological Process: pigment biosynthetic process (GO:0046148);;	--	Polyphenol oxidase, chloroplastic OS=Malus domestica PE=2 SV=1	hypothetical protein VITISV_006012 [Vitis vinifera]
gi_351621251_gb_JP475552.1	5.81e-05	-1.41112	down	[QR]	--	Cellular Component: nucleus (GO:0005634);; Biological Process: iron ion transport (GO:0006826);; Biological Process: pollen development (GO:0009555);; Biological Process: pollen tube growth (GO:0009860);; Biological Process: response to zinc ion (GO:0010043);; Biological Process: phloem transport (GO:0010233);; Molecular Function: nicotianamine synthase activity (GO:0030410);; Biological Process:…	K05953|1e-134|rcu:RCOM_1435160|Nicotianamine synthase, putative (EC:2.5.1.43)	Nicotianamine synthase OS=Solanum lycopersicum GN=CHLN PE=2 SV=1	hypothetical protein PRUPE_ppa008576mg [Prunus persica]
gi_351611914_gb_JP466215.1	2.54e-07	-1.40768	down	--	--	Molecular Function: DNA binding (GO:0003677);; Molecular Function: sequence-specific DNA binding transcription factor activity (GO:0003700);; Molecular Function: protein binding (GO:0005515);; Cellular Component: nucleoplasm (GO:0005654);; Biological Process: transcription from RNA polymerase II promoter (GO:0006366);; Biological Process: response to water deprivation (GO:0009414);; Biological Pr…	--	Nuclear transcription factor Y subunit A-8 OS=Arabidopsis thaliana GN=NFYA8 PE=2 SV=2	hypothetical protein PRUPE_ppa016008mg [Prunus persica]
gi_351598425_gb_JP452949.1	0.00609697	-1.40491	down	--	--	Cellular Component: chloroplast thylakoid membrane (GO:0009535);; Cellular Component: chloroplast stroma (GO:0009570);; Biological Process: response to wounding (GO:0009611);; Cellular Component: chloroplast envelope (GO:0009941);; Biological Process: myo-inositol hexakisphosphate biosynthetic process (GO:0010264);; Biological Process: photosynthesis (GO:0015979);; Biological Process: carotenoid …	--	--	protein binding protein, putative [Ricinus communis]
gi_351621113_gb_JP475414.1	3.57e-09	-1.4042	down	--	--	Biological Process: polysaccharide biosynthetic process (GO:0000271);; Cellular Component: cell wall (GO:0005618);; Cellular Component: nucleolus (GO:0005730);; Cellular Component: mitochondrion (GO:0005739);; Cellular Component: spindle (GO:0005819);; Cellular Component: plasma membrane (GO:0005886);; Cellular Component: phragmoplast (GO:0009524);; Biological Process: anthocyanin-containing comp…	--	Formin-like protein 1 OS=Arabidopsis thaliana GN=FH1 PE=1 SV=1	hypothetical protein PRUPE_ppa000494mg [Prunus persica]
gi_351611286_gb_JP465587.1	0.00452738	-1.40363	down	--	--	Cellular Component: chloroplast thylakoid membrane (GO:0009535);; Biological Process: chloroplast relocation (GO:0009902);; Biological Process: leaf morphogenesis (GO:0009965);; Biological Process: thylakoid membrane organization (GO:0010027);; Biological Process: carotenoid biosynthetic process (GO:0016117);; Molecular Function: kinase activity (GO:0016301);; Molecular Function: phosphotransfera…	--	--	hypothetical protein PRUPE_ppa011164mg [Prunus persica]
gi_351605557_gb_JP459901.1	9.17e-06	-1.4027	down	--	--	Biological Process: maltose metabolic process (GO:0000023);; Biological Process: sulfur amino acid metabolic process (GO:0000096);; Molecular Function: iron ion binding (GO:0005506);; Molecular Function: protein binding (GO:0005515);; Cellular Component: plasma membrane (GO:0005886);; Biological Process: glycine catabolic process (GO:0006546);; Biological Process: unsaturated fatty acid biosynthe…	--	Linoleate 13S-lipoxygenase 2-1, chloroplastic OS=Solanum tuberosum GN=LOX2.1 PE=1 SV=1	lipoxygenase [Camellia sinensis]
gi_351598542_gb_JP453059.1	0.000800176	-1.39259	down	--	--	Biological Process: response to oxidative stress (GO:0006979);; Cellular Component: chloroplast thylakoid membrane (GO:0009535);; Biological Process: thylakoid membrane organization (GO:0010027);; Biological Process: isopentenyl diphosphate biosynthetic process, mevalonate-independent pathway (GO:0019288);; Biological Process: cellular cation homeostasis (GO:0030003);; Biological Process: divalen…	--	--	PREDICTED: uncharacterized protein LOC101219293 [Cucumis sativus]
gi_351614921_gb_JP469222.1	0.00078636	-1.39229	down	--	--	Molecular Function: protein binding (GO:0005515);; Cellular Component: nucleus (GO:0005634);; Biological Process: response to virus (GO:0009615);; Biological Process: glutamine secretion (GO:0010585);; Cellular Component: integral to membrane (GO:0016021);; Cellular Component: cytoplasmic membrane-bounded vesicle (GO:0016023);; Biological Process: virus-host interaction (GO:0019048);; Biological …	--	Protein GLUTAMINE DUMPER 3 OS=Arabidopsis thaliana GN=GDU3 PE=2 SV=1	PREDICTED: protein GLUTAMINE DUMPER 3-like [Fragaria vesca subsp. vesca]
gi_351628057_gb_JP480940.1	0.00314755	-1.39114	down	--	--	Molecular Function: calcium ion binding (GO:0005509);; Molecular Function: calcium-dependent phospholipid binding (GO:0005544);; Cellular Component: nuclear envelope (GO:0005635);; Cellular Component: nucleoplasm (GO:0005654);; Cellular Component: endoplasmic reticulum membrane (GO:0005789);; Cellular Component: spindle (GO:0005819);; Cellular Component: cytosol (GO:0005829);; Cellular Component:…	--	Annexin D5 OS=Arabidopsis thaliana GN=ANN5 PE=2 SV=2	Annexin 5 isoform 1 [Theobroma cacao]
gi_351618525_gb_JP472826.1	0.00664276	-1.38862	down	--	--	Molecular Function: protein binding (GO:0005515);; Cellular Component: mitochondrion (GO:0005739);; Cellular Component: plasmodesma (GO:0009506);; Biological Process: response to virus (GO:0009615);; Biological Process: plant-type hypersensitive response (GO:0009626);; Biological Process: response to ozone (GO:0010193);; Biological Process: cellular component organization (GO:0016043);; Cellular …	--	TMV resistance protein N OS=Nicotiana glutinosa GN=N PE=1 SV=1	nematode resistance-like protein [Prunus cerasifera]
gi_351618105_gb_JP472406.1	0.00184673	-1.38747	down	--	--	Cellular Component: extracellular region (GO:0005576);; Biological Process: response to stress (GO:0006950);; Biological Process: metabolic process (GO:0008152);; Molecular Function: pectinesterase activity (GO:0030599);; Biological Process: negative regulation of catalytic activity (GO:0043086);; Molecular Function: pectinesterase inhibitor activity (GO:0046910);; Biological Process: regulation …	--	21 kDa protein OS=Daucus carota PE=2 SV=1	21 kDa protein precursor, putative [Ricinus communis]
gi_351596822_gb_JP451376.1	0.00574025	-1.38442	down	[HI]	--	Molecular Function: 1-deoxy-D-xylulose-5-phosphate synthase activity (GO:0008661);; Biological Process: thiamine biosynthetic process (GO:0009228);; Cellular Component: chloroplast stroma (GO:0009570);; Biological Process: chlorophyll biosynthetic process (GO:0015995);; Biological Process: terpenoid biosynthetic process (GO:0016114);; Molecular Function: metal ion binding (GO:0046872);; Biologica…	K01662|0.0|rcu:RCOM_0025610|1-deoxyxylulose-5-phosphate synthase, putative (EC:2.2.1.7)	Probable 1-deoxy-D-xylulose-5-phosphate synthase 2, chloroplastic OS=Oryza sativa subsp. japonica GN=Os07g0190000 PE=2 SV=1	1-deoxyxylulose-5-phosphate synthase, putative [Ricinus communis]
gi_351624575_gb_JP478876.1	9.83e-08	-1.38427	down	[HC]	--	Biological Process: cellular aromatic compound metabolic process (GO:0006725);; Biological Process: response to osmotic stress (GO:0006970);; Biological Process: response to heat (GO:0009408);; Biological Process: response to water deprivation (GO:0009414);; Cellular Component: chloroplast thylakoid membrane (GO:0009535);; Molecular Function: zeaxanthin epoxidase [overall] activity (GO:0009540);;…	K09838|0.0|vvi:100232944|ZEP	Zeaxanthin epoxidase, chloroplastic OS=Prunus armeniaca PE=2 SV=1	PREDICTED: zeaxanthin epoxidase, chloroplastic-like [Cucumis sativus]
gi_351606724_gb_JP461050.1	1.38e-09	-1.37747	down	--	--	Molecular Function: DNA binding (GO:0003677);; Cellular Component: extracellular region (GO:0005576);; Biological Process: cellular aromatic compound metabolic process (GO:0006725);; Biological Process: defense response (GO:0006952);; Molecular Function: peptidase activity (GO:0008233);; Biological Process: response to abiotic stimulus (GO:0009628);; Biological Process: response to hormone stimul…	--	Protein ASPARTIC PROTEASE IN GUARD CELL 2 OS=Arabidopsis thaliana GN=ASPG2 PE=2 SV=1	PREDICTED: protein ASPARTIC PROTEASE IN GUARD CELL 2-like [Fragaria vesca subsp. vesca]
gi_351622701_gb_JP477002.1	2.15e-07	-1.36851	down	--	--	--	--	--	unnamed protein product [Vitis vinifera]
gi_351604153_gb_JP458507.1	0.00390177	-1.36836	down	--	--	Biological Process: MAPK cascade (GO:0000165);; Molecular Function: calcium ion binding (GO:0005509);; Molecular Function: protein binding (GO:0005515);; Biological Process: pentose-phosphate shunt (GO:0006098);; Biological Process: rRNA processing (GO:0006364);; Biological Process: protein targeting to membrane (GO:0006612);; Molecular Function: poly(U) RNA binding (GO:0008266);; Cellular Compon…	K02716|0.0|pop:POPTR_716206|photosystem II oxygen-evolving complex 33 KDa subunit	Oxygen-evolving enhancer protein 1, chloroplastic OS=Nicotiana tabacum GN=PSBO PE=2 SV=1	chloroplast PsbO4 precursor [Nicotiana benthamiana]
gi_351624828_gb_JP479129.1	0.000204439	-1.36504	down	--	--	Molecular Function: binding (GO:0005488);; Biological Process: defense response (GO:0006952);;	--	Putative disease resistance RPP13-like protein 1 OS=Arabidopsis thaliana GN=RPPL1 PE=3 SV=1	NBS type disease resistance protein, putative [Theobroma cacao]
gi_351619288_gb_JP473589.1	5.27e-05	-1.35907	down	--	--	Cellular Component: nucleus (GO:0005634);; Biological Process: xylem development (GO:0010089);; Biological Process: cell wall macromolecule metabolic process (GO:0044036);;	--	--	NC domain-containing protein-related [Theobroma cacao]
gi_351616482_gb_JP470783.1	0.00204789	-1.35834	down	--	--	Cellular Component: cell wall (GO:0005618);; Cellular Component: plasma membrane (GO:0005886);; Biological Process: response to UV (GO:0009411);; Biological Process: tissue development (GO:0009888);; Biological Process: cell growth (GO:0016049);; Cellular Component: intracellular membrane-bounded organelle (GO:0043231);; Biological Process: actin nucleation (GO:0045010);; Biological Process: orga…	--	Formin-like protein 1 OS=Arabidopsis thaliana GN=FH1 PE=1 SV=1	Formin isoform 2 [Theobroma cacao]
gi_351611450_gb_JP465751.1	0.00293967	-1.35383	down	--	--	Biological Process: defense response to insect (GO:0002213);; Molecular Function: chitinase activity (GO:0004568);; Molecular Function: protein binding (GO:0005515);; Cellular Component: extracellular region (GO:0005576);; Cellular Component: cytoplasm (GO:0005737);; Biological Process: chitin catabolic process (GO:0006032);; Cellular Component: plant-type cell wall (GO:0009505);; Molecular Funct…	--	Pistil-specific extensin-like protein OS=Nicotiana tabacum PE=2 SV=1	HyPRP1 [Gossypium hirsutum]
gi_351611704_gb_JP466005.1	1.2e-07	-1.35314	down	--	--	Biological Process: rRNA processing (GO:0006364);; Cellular Component: chloroplast thylakoid (GO:0009534);; Cellular Component: chloroplast thylakoid membrane (GO:0009535);; Biological Process: plastid organization (GO:0009657);; Biological Process: stomatal complex morphogenesis (GO:0010103);; Biological Process: photosystem II assembly (GO:0010207);; Cellular Component: membrane (GO:0016020);; …	--	Thylakoid membrane phosphoprotein 14 kDa, chloroplastic OS=Arabidopsis thaliana GN=TMP14 PE=1 SV=2	hypothetical protein PRUPE_ppa012979mg [Prunus persica]
gi_351623727_gb_JP478028.1	0.00395054	-1.35111	down	--	--	Molecular Function: binding (GO:0005488);; Biological Process: defense response (GO:0006952);; Cellular Component: cell part (GO:0044464);;	--	Disease resistance protein RPM1 OS=Arabidopsis thaliana GN=RPM1 PE=1 SV=1	PREDICTED: disease resistance protein RPM1-like [Vitis vinifera]
gi_351613598_gb_JP467899.1	0.00233917	-1.34213	down	--	--	--	--	--	conserved hypothetical protein [Ricinus communis]
gi_351628031_gb_JP480914.1	0.000114959	-1.34204	down	--	--	Molecular Function: protein serine/threonine kinase activity (GO:0004674);; Molecular Function: binding (GO:0005488);; Molecular Function: ATP binding (GO:0005524);; Cellular Component: plasma membrane (GO:0005886);; Biological Process: protein phosphorylation (GO:0006468);; Biological Process: signal transduction (GO:0007165);; Biological Process: transmembrane receptor protein tyrosine kinase s…	--	Somatic embryogenesis receptor kinase 2 OS=Arabidopsis thaliana GN=SERK2 PE=1 SV=1	hypothetical protein PRUPE_ppa002373mg [Prunus persica]
gi_351623596_gb_JP477897.1	0.000963541	-1.34126	down	[IQR]	--	Biological Process: maltose metabolic process (GO:0000023);; Molecular Function: nucleotide binding (GO:0000166);; Cellular Component: peroxisome (GO:0005777);; Cellular Component: cytosol (GO:0005829);; Biological Process: pentose-phosphate shunt (GO:0006098);; Biological Process: metabolic process (GO:0008152);; Molecular Function: oxidoreductase activity (GO:0016491);; Molecular Function: oxid…	--	Tropinone reductase homolog OS=Datura stramonium PE=2 SV=1	PREDICTED: tropinone reductase homolog [Cicer arietinum]
gi_351614506_gb_JP468807.1	0.000109633	-1.33588	down	--	--	Molecular Function: transcription coactivator activity (GO:0003713);; Molecular Function: protein binding (GO:0005515);; Cellular Component: nucleus (GO:0005634);; Cellular Component: chromosome (GO:0005694);; Biological Process: regulation of transcription, DNA-dependent (GO:0006355);; Biological Process: RNA processing (GO:0006396);; Biological Process: cell proliferation (GO:0008283);; Biologi…	--	GRF1-interacting factor 1 OS=Arabidopsis thaliana GN=GIF1 PE=1 SV=1	SSXT family protein isoform 1 [Theobroma cacao]
gi_351597173_gb_JP451723.1	0.000508192	-1.33573	down	--	--	Molecular Function: nucleoside transmembrane transporter activity (GO:0005337);; Cellular Component: vacuolar membrane (GO:0005774);; Cellular Component: plasma membrane (GO:0005886);; Biological Process: purine nucleobase transport (GO:0006863);; Biological Process: pyrimidine nucleoside transport (GO:0015864);; Cellular Component: integral to membrane (GO:0016021);;	--	Equilibrative nucleotide transporter 3 OS=Arabidopsis thaliana GN=ENT3 PE=1 SV=1	Major facilitator superfamily protein [Theobroma cacao]
gi_351623486_gb_JP477787.1	0.000297642	-1.33431	down	--	--	Cellular Component: nucleus (GO:0005634);; Cellular Component: plasma membrane (GO:0005886);; Biological Process: regulation of transcription, DNA-dependent (GO:0006355);; Biological Process: response to stress (GO:0006950);; Biological Process: circadian rhythm (GO:0007623);; Biological Process: regulation of flower development (GO:0009909);; Biological Process: far-red light signaling pathway (…	--	Putative zinc finger protein At1g68190 OS=Arabidopsis thaliana GN=At1g68190 PE=2 SV=1	B-box zinc finger family protein, putative isoform 2 [Theobroma cacao]
gi_351616005_gb_JP470306.1	0.00205681	-1.32955	down	--	--	Cellular Component: extracellular region (GO:0005576);;	--	--	hypothetical protein PRUPE_ppa012325mg [Prunus persica]
gi_351623423_gb_JP477724.1	0.00307682	-1.32776	down	--	--	Molecular Function: protein binding (GO:0005515);; Biological Process: cellular process (GO:0009987);; Cellular Component: cell part (GO:0044464);; Biological Process: innate immune response (GO:0045087);;	--	Putative disease resistance protein RGA1 OS=Solanum bulbocastanum GN=RGA1 PE=2 SV=2	putative CC-NBS-LRR resistance protein [Malus domestica]
gi_351612001_gb_JP466302.1	5.56e-09	-1.32623	down	--	--	Biological Process: polysaccharide biosynthetic process (GO:0000271);; Biological Process: establishment of planar polarity (GO:0001736);; Biological Process: amino acid transmembrane transport (GO:0003333);; Cellular Component: endosome (GO:0005768);; Cellular Component: Golgi apparatus (GO:0005794);; Cellular Component: plasma membrane (GO:0005886);; Biological Process: acetyl-CoA metabolic pro…	K13946|0.0|pop:POPTR_653103|PtrAUX1	Auxin transporter-like protein 2 OS=Medicago truncatula GN=LAX2 PE=2 SV=1	PREDICTED: auxin transporter-like protein 2-like [Cicer arietinum]
gi_351598678_gb_JP453191.1	0.00116513	-1.32319	down	--	--	Molecular Function: ferric-chelate reductase activity (GO:0000293);; Biological Process: immune system process (GO:0002376);; Molecular Function: ion channel activity (GO:0005216);; Molecular Function: protein binding (GO:0005515);; Cellular Component: extracellular region (GO:0005576);; Cellular Component: mitochondrial respiratory chain complex I (GO:0005747);; Biological Process: glycolysis (G…	--	Ferric reduction oxidase 4 OS=Arabidopsis thaliana GN=FRO4 PE=2 SV=1	unnamed protein product [Vitis vinifera]
gi_351601723_gb_JP456164.1	0.0029004	-1.32167	down	--	--	Biological Process: regulation of cell growth by extracellular stimulus (GO:0001560);; Molecular Function: L-alanine:2-oxoglutarate aminotransferase activity (GO:0004021);; Molecular Function: L-aspartate:2-oxoglutarate aminotransferase activity (GO:0004069);; Molecular Function: cystathionine beta-lyase activity (GO:0004121);; Molecular Function: L-tyrosine:2-oxoglutarate aminotransferase activi…	--	Tyrosine aminotransferase OS=Arabidopsis thaliana GN=TAT PE=2 SV=1	hypothetical protein VITISV_037882 [Vitis vinifera]
gi_351620844_gb_JP475145.1	0.0029051	-1.31466	down	--	--	Biological Process: pentose-phosphate shunt (GO:0006098);; Cellular Component: chloroplast thylakoid membrane (GO:0009535);; Biological Process: photosynthetic electron transport in photosystem I (GO:0009773);; Biological Process: myo-inositol hexakisphosphate biosynthetic process (GO:0010264);; Cellular Component: NAD(P)H dehydrogenase complex (plastoquinone) (GO:0010598);;	--	--	hypothetical protein PRUPE_ppa007725mg [Prunus persica]
gi_351596544_gb_JP451100.1	2.09e-08	-1.31249	down	--	--	Molecular Function: binding (GO:0005488);;	--	Disease resistance RPP13-like protein 4 OS=Arabidopsis thaliana GN=RPP13L4 PE=2 SV=2	hypothetical protein PRUPE_ppa001384mg [Prunus persica]
gi_351607005_gb_JP461329.1	0.00217484	-1.31184	down	--	--	--	K14488|1e-47|rcu:RCOM_1597250|Auxin-induced protein 6B, putative	Indole-3-acetic acid-induced protein ARG7 OS=Vigna radiata var. radiata GN=ARG7 PE=2 SV=1	hypothetical protein PRUPE_ppa012885mg [Prunus persica]
gi_351591129_gb_JP449585.1	8.26e-08	-1.30949	down	[RTKL]	--	Biological Process: polysaccharide biosynthetic process (GO:0000271);; Molecular Function: protein serine/threonine kinase activity (GO:0004674);; Molecular Function: ATP binding (GO:0005524);; Cellular Component: extracellular region (GO:0005576);; Cellular Component: plasma membrane (GO:0005886);; Biological Process: cellular glucan metabolic process (GO:0006073);; Biological Process: protein p…	--	Protein NSP-INTERACTING KINASE 2 OS=Arabidopsis thaliana GN=NIK2 PE=1 SV=1	hypothetical protein PRUPE_ppa002873mg [Prunus persica]
gi_351619706_gb_JP474007.1	2.35e-05	-1.30813	down	--	--	Cellular Component: extracellular region (GO:0005576);; Cellular Component: endosome (GO:0005768);; Cellular Component: Golgi apparatus (GO:0005794);; Cellular Component: trans-Golgi network (GO:0005802);; Biological Process: response to stress (GO:0006950);; Biological Process: response to desiccation (GO:0009269);; Biological Process: response to cold (GO:0009409);; Biological Process: response…	--	Dehydration-responsive protein RD22 OS=Arabidopsis thaliana GN=RD22 PE=2 SV=1	RD22-like protein precursor [Vitis vinifera]
gi_351622237_gb_JP476538.1	4.68e-05	-1.30735	down	--	--	Biological Process: response to stress (GO:0006950);; Cellular Component: chloroplast thylakoid membrane (GO:0009535);; Molecular Function: heat shock protein binding (GO:0031072);;	--	--	hypothetical protein PRUPE_ppa026691mg, partial [Prunus persica]
gi_351619319_gb_JP473620.1	5.49e-05	-1.30613	down	--	--	Cellular Component: cell wall (GO:0005618);; Cellular Component: vacuolar membrane (GO:0005774);; Biological Process: acetyl-CoA metabolic process (GO:0006084);; Biological Process: steroid biosynthetic process (GO:0006694);; Biological Process: calcium ion transport (GO:0006816);; Biological Process: Golgi organization (GO:0007030);; Biological Process: response to salt stress (GO:0009651);; Bio…	--	Fasciclin-like arabinogalactan protein 1 OS=Arabidopsis thaliana GN=FLA1 PE=1 SV=1	fasciclin-like arabinogalactan protein 10 [Gossypium hirsutum]
gi_351599046_gb_JP453550.1	0.000189224	-1.30389	down	--	--	Molecular Function: guanyl-nucleotide exchange factor activity (GO:0005085);; Biological Process: cellular membrane fusion (GO:0006944);; Biological Process: plant-type cell wall modification (GO:0009827);; Biological Process: pollen tube growth (GO:0009860);; Molecular Function: oxidoreductase activity (GO:0016491);; Biological Process: cysteine biosynthetic process (GO:0019344);; Molecular Func…	--	Rop guanine nucleotide exchange factor 1 OS=Arabidopsis thaliana GN=ROPGEF1 PE=1 SV=2	hypothetical protein PRUPE_ppa003643mg [Prunus persica]
gi_351598670_gb_JP453183.1	0.000110837	-1.30054	down	--	--	Molecular Function: calmodulin binding (GO:0005516);; Cellular Component: nucleus (GO:0005634);; Cellular Component: cytosol (GO:0005829);; Cellular Component: plasma membrane (GO:0005886);; Biological Process: acetyl-CoA metabolic process (GO:0006084);; Biological Process: microtubule nucleation (GO:0007020);; Biological Process: regulation of meristem growth (GO:0010075);; Biological Process: s…	--	Protein IQ-DOMAIN 1 OS=Arabidopsis thaliana GN=IQD1 PE=1 SV=1	hypothetical protein PRUPE_ppa018100mg [Prunus persica]
gi_351624450_gb_JP478751.1	0.000242402	-1.29757	down	[HC]	--	Biological Process: polysaccharide biosynthetic process (GO:0000271);; Molecular Function: squalene monooxygenase activity (GO:0004506);; Cellular Component: extracellular region (GO:0005576);; Cellular Component: endoplasmic reticulum (GO:0005783);; Biological Process: cellular aromatic compound metabolic process (GO:0006725);; Biological Process: cholesterol metabolic process (GO:0008203);; Bio…	K00511|0.0|vvi:100265235|hypothetical protein LOC100265235	Squalene monooxygenase OS=Panax ginseng PE=2 SV=1	squalene epoxidase [Camellia oleifera]
gi_351623933_gb_JP478234.1	4.63e-07	-1.29577	down	--	--	Molecular Function: binding (GO:0005488);; Biological Process: transport (GO:0006810);; Biological Process: response to oxidative stress (GO:0006979);; Cellular Component: chloroplast thylakoid membrane (GO:0009535);; Biological Process: response to wounding (GO:0009611);; Cellular Component: thylakoid lumen (GO:0031977);; Biological Process: primary metabolic process (GO:0044238);; Cellular Comp…	--	Apolipoprotein D OS=Mus musculus GN=Apod PE=2 SV=1	Chloroplastic lipocalin [Theobroma cacao]
gi_351625678_gb_JP479979.1	3.89e-05	-1.29334	down	--	--	Biological Process: MAPK cascade (GO:0000165);; Molecular Function: nucleotide binding (GO:0000166);; Molecular Function: nucleic acid binding (GO:0003676);; Molecular Function: RNA binding (GO:0003723);; Molecular Function: RNA-directed RNA polymerase activity (GO:0003968);; Cellular Component: nucleus (GO:0005634);; Cellular Component: nucleolus (GO:0005730);; Biological Process: chromatin sile…	--	RNA-dependent RNA polymerase 1 OS=Arabidopsis thaliana GN=RDR1 PE=2 SV=1	rna-dependent RNA polymerase [Populus trichocarpa]
gi_351629402_gb_JP482285.1	0.00128531	-1.2925	down	--	--	Cellular Component: nucleus (GO:0005634);; Cellular Component: chloroplast stroma (GO:0009570);; Cellular Component: chloroplast envelope (GO:0009941);; Biological Process: carotenoid biosynthetic process (GO:0016117);; Biological Process: isopentenyl diphosphate biosynthetic process, mevalonate-independent pathway (GO:0019288);;	--	Putative GPI-anchored protein PB15E9.01c OS=Schizosaccharomyces pombe (strain 972 / ATCC 24843) GN=SPAPB15E9.01c PE=2 SV=3	unnamed protein product [Vitis vinifera]
gi_351628305_gb_JP481188.1	0.000320852	-1.2895	down	[GEPR]	--	Molecular Function: sugar:hydrogen symporter activity (GO:0005351);; Cellular Component: nucleus (GO:0005634);; Cellular Component: vacuolar membrane (GO:0005774);; Cellular Component: Golgi apparatus (GO:0005794);; Cellular Component: plasma membrane (GO:0005886);; Biological Process: response to water deprivation (GO:0009414);; Cellular Component: chloroplast (GO:0009507);; Biological Process: …	--	Sugar transporter ERD6-like 7 OS=Arabidopsis thaliana GN=At2g48020 PE=2 SV=2	PREDICTED: sugar transporter ERD6-like 7-like [Fragaria vesca subsp. vesca]
gi_351599222_gb_JP453721.1	0.000313438	-1.28619	down	--	--	Biological Process: microtubule cytoskeleton organization (GO:0000226);; Biological Process: cytokinesis by cell plate formation (GO:0000911);; Cellular Component: extracellular region (GO:0005576);; Cellular Component: endoplasmic reticulum (GO:0005783);; Cellular Component: plasma membrane (GO:0005886);; Biological Process: carbohydrate metabolic process (GO:0005975);; Biological Process: DNA m…	--	Glucan endo-1,3-beta-glucosidase 12 OS=Arabidopsis thaliana GN=At4g29360 PE=1 SV=1	O-Glycosyl hydrolases family 17 protein isoform 1 [Theobroma cacao]
gi_351629234_gb_JP482117.1	0.00117107	-1.28207	down	[QR]	--	Cellular Component: nucleus (GO:0005634);; Cellular Component: cytoplasm (GO:0005737);; Cellular Component: plasma membrane (GO:0005886);; Molecular Function: O-methyltransferase activity (GO:0008171);; Cellular Component: plasmodesma (GO:0009506);; Biological Process: lignin biosynthetic process (GO:0009809);; Molecular Function: luteolin O-methyltransferase activity (GO:0030744);; Molecular Fun…	--	(RS)-norcoclaurine 6-O-methyltransferase OS=Coptis japonica PE=1 SV=1	O-methyltransferase OMT2 [Vitis vinifera]
gi_351612444_gb_JP466745.1	0.00295556	-1.2818	down	--	--	Cellular Component: mitochondrion (GO:0005739);; Cellular Component: membrane (GO:0016020);;	--	CASP-like protein VIT_05s0020g01820 OS=Vitis vinifera GN=VIT_05s0020g01820 PE=2 SV=1	hypothetical protein PRUPE_ppa011729mg [Prunus persica]
gi_351623766_gb_JP478067.1	0.00016149	-1.27849	down	--	--	Cellular Component: nucleus (GO:0005634);; Biological Process: entrainment of circadian clock (GO:0009649);; Biological Process: regulation of flower development (GO:0009909);; Biological Process: red or far-red light signaling pathway (GO:0010017);; Biological Process: response to red light (GO:0010114);; Biological Process: positive regulation of circadian rhythm (GO:0042753);; Molecular Functi…	--	Protein EARLY FLOWERING 4 OS=Arabidopsis thaliana GN=ELF4 PE=1 SV=1	Uncharacterized protein TCM_042505 [Theobroma cacao]
gi_351615523_gb_JP469824.1	0.00627011	-1.27263	down	--	--	Molecular Function: DNA binding (GO:0003677);; Molecular Function: sequence-specific DNA binding transcription factor activity (GO:0003700);; Cellular Component: nucleus (GO:0005634);; Biological Process: regulation of transcription, DNA-dependent (GO:0006355);; Biological Process: tissue development (GO:0009888);; Biological Process: root development (GO:0048364);; Biological Process: cell wall …	--	Dof zinc finger protein DOF2.5 OS=Arabidopsis thaliana GN=DOF2.5 PE=2 SV=3	hypothetical protein PRUPE_ppa010132mg [Prunus persica]
gi_351617815_gb_JP472116.1	0.000800394	-1.27234	down	--	--	Cellular Component: chloroplast (GO:0009507);; Molecular Function: heat shock protein binding (GO:0031072);; Biological Process: cellular metabolic process (GO:0044237);; Molecular Function: unfolded protein binding (GO:0051082);;	--	--	DnaJ/Hsp40 cysteine-rich domain superfamily protein isoform 1 [Theobroma cacao]
gi_351603794_gb_JP458149.1	0.000323517	-1.26745	down	--	--	Biological Process: transition metal ion transport (GO:0000041);;	--	--	PAR1 protein [Theobroma cacao]
gi_351595740_gb_JP450305.1	0.000218285	-1.26734	down	--	--	Biological Process: defense response to nematode (GO:0002215);; Molecular Function: peroxidase activity (GO:0004601);; Molecular Function: protein binding (GO:0005515);; Cellular Component: cell wall (GO:0005618);; Cellular Component: vacuolar membrane (GO:0005774);; Cellular Component: Golgi apparatus (GO:0005794);; Cellular Component: cytosol (GO:0005829);; Biological Process: response to oxida…	K00430|1e-175|vvi:100257059|hypothetical protein LOC100257059	Peroxidase 4 OS=Vitis vinifera GN=GSVIVT00023967001 PE=1 SV=1	Peroxidase superfamily protein [Theobroma cacao]
gi_351597772_gb_JP452312.1	0.000352797	-1.25752	down	--	--	Molecular Function: transporter activity (GO:0005215);; Molecular Function: ATP transmembrane transporter activity (GO:0005347);; Cellular Component: mitochondrial inner membrane (GO:0005743);; Biological Process: protein targeting to membrane (GO:0006612);; Biological Process: mitochondrial transport (GO:0006839);; Biological Process: amino acid transport (GO:0006865);; Biological Process: ER to…	--	Adenine nucleotide transporter BT1, chloroplastic/mitochondrial OS=Arabidopsis thaliana GN=BT1 PE=1 SV=1	PREDICTED: protein brittle-1, chloroplastic/amyloplastic [Vitis vinifera]
gi_351619300_gb_JP473601.1	2.44e-05	-1.25169	down	--	--	Cellular Component: cytochrome b6f complex (GO:0009512);; Cellular Component: chloroplast thylakoid membrane (GO:0009535);; Biological Process: photosynthesis (GO:0015979);; Cellular Component: integral to membrane (GO:0016021);; Biological Process: cellular component organization (GO:0016043);; Biological Process: electron transport chain (GO:0022900);; Biological Process: cellular component bio…	--	Cytochrome b6-f complex subunit 7 (Fragment) OS=Spinacia oleracea GN=petM PE=1 SV=1	Cytochrome P450 82C4, putative isoform 2 [Theobroma cacao]
gi_351628577_gb_JP481460.1	3.78e-05	-1.25058	down	--	--	--	--	--	hypothetical protein PRUPE_ppa001462mg [Prunus persica]
gi_351597145_gb_JP451695.1	7.24e-05	-1.25021	down	--	--	Molecular Function: protein binding (GO:0005515);; Biological Process: carbohydrate metabolic process (GO:0005975);; Biological Process: response to osmotic stress (GO:0006970);; Biological Process: response to water deprivation (GO:0009414);; Biological Process: response to external stimulus (GO:0009605);; Biological Process: response to auxin stimulus (GO:0009733);; Biological Process: response…	--	Auxin-responsive protein IAA3 OS=Arabidopsis thaliana GN=IAA3 PE=1 SV=1	hypothetical protein PRUPE_ppa018535mg [Prunus persica]
gi_351603723_gb_JP458079.1	0.000198197	-1.24741	down	--	--	--	--	--	Transcription initiation factor TFIID subunit 11, putative [Theobroma cacao]
gi_351624052_gb_JP478353.1	0.00720824	-1.24648	down	--	--	Cellular Component: chloroplast (GO:0009507);; Cellular Component: membrane (GO:0016020);;	--	--	predicted protein [Populus trichocarpa]
gi_351611618_gb_JP465919.1	0.00971223	-1.24632	down	--	--	Biological Process: rRNA processing (GO:0006364);; Cellular Component: chloroplast stromal thylakoid (GO:0009533);; Biological Process: plastid organization (GO:0009657);; Biological Process: photosystem II assembly (GO:0010207);; Cellular Component: integral to membrane (GO:0016021);; Biological Process: cysteine biosynthetic process (GO:0019344);; Cellular Component: chloroplast photosystem II …	K02723|1e-70|vvi:100252545|hypothetical protein LOC100252545	Photosystem II core complex proteins psbY, chloroplastic OS=Arabidopsis thaliana GN=PSBY PE=2 SV=1	PREDICTED: photosystem II core complex proteins psbY, chloroplastic-like [Vitis vinifera]
gi_351611463_gb_JP465764.1	0.006011	-1.24053	down	--	--	Biological Process: photosynthetic electron transport in photosystem I (GO:0009773);; Biological Process: photosynthetic NADP+ reduction (GO:0009780);; Cellular Component: chloroplast envelope (GO:0009941);; Cellular Component: integral to membrane (GO:0016021);; Molecular Function: chlorophyll binding (GO:0016168);; Biological Process: cysteine biosynthetic process (GO:0019344);; Biological Proc…	K08905|3e-50|rcu:RCOM_0302140|Photosystem I reaction center subunit V, chloroplast precursor, putative	Photosystem I reaction center subunit V, chloroplastic OS=Arabidopsis thaliana GN=PSAG PE=1 SV=1	PREDICTED: photosystem I reaction center subunit V, chloroplastic-like [Fragaria vesca subsp. vesca]
gi_351607499_gb_JP461820.1	0.00834604	-1.239	down	--	--	Molecular Function: DNA binding (GO:0003677);; Molecular Function: sequence-specific DNA binding transcription factor activity (GO:0003700);; Molecular Function: protein binding (GO:0005515);; Cellular Component: nucleus (GO:0005634);; Biological Process: regulation of transcription, DNA-dependent (GO:0006355);; Biological Process: positive regulation of cell proliferation (GO:0008284);; Biologic…	--	WUSCHEL-related homeobox 8 OS=Oryza sativa subsp. japonica GN=WOX8 PE=2 SV=1	PREDICTED: WUSCHEL-related homeobox 8 [Vitis vinifera]
gi_351597554_gb_JP452099.1	1.22e-06	-1.23779	down	--	--	Molecular Function: aspartic-type endopeptidase activity (GO:0004190);; Cellular Component: extracellular region (GO:0005576);; Biological Process: proteolysis (GO:0006508);; Biological Process: defense response (GO:0006952);; Biological Process: response to abiotic stimulus (GO:0009628);; Biological Process: salicylic acid metabolic process (GO:0009696);; Biological Process: response to hormone …	--	Protein ASPARTIC PROTEASE IN GUARD CELL 1 OS=Arabidopsis thaliana GN=ASPG1 PE=1 SV=1	unknown [Populus trichocarpa]
gi_351628977_gb_JP481860.1	4.92e-06	-1.23532	down	--	--	Cellular Component: vacuolar membrane (GO:0005774);; Biological Process: purine nucleobase transport (GO:0006863);; Biological Process: unidimensional cell growth (GO:0009826);; Biological Process: regulation of hormone levels (GO:0010817);; Cellular Component: membrane (GO:0016020);; Biological Process: glucosinolate biosynthetic process (GO:0019761);; Biological Process: positive regulation of …	--	WAT1-related protein At3g28050 OS=Arabidopsis thaliana GN=At3g28050 PE=2 SV=1	hypothetical protein PRUPE_ppa007567mg [Prunus persica]
gi_351628820_gb_JP481703.1	0.00147938	-1.22088	down	--	--	Biological Process: protein polyubiquitination (GO:0000209);; Molecular Function: binding (GO:0005488);; Molecular Function: ligase activity (GO:0016874);; Biological Process: developmental process (GO:0032502);; Cellular Component: intracellular part (GO:0044424);; Molecular Function: metal ion binding (GO:0046872);;	--	Probable E3 ubiquitin-protein ligase rbrA OS=Dictyostelium discoideum GN=rbrA PE=3 SV=1	zinc finger protein, putative [Ricinus communis]
gi_351599758_gb_JP454244.1	0.00989471	-1.21628	down	--	--	Molecular Function: transcription cofactor activity (GO:0003712);; Molecular Function: histone acetyltransferase activity (GO:0004402);; Molecular Function: calmodulin binding (GO:0005516);; Cellular Component: extracellular region (GO:0005576);; Cellular Component: nucleus (GO:0005634);; Cellular Component: vacuolar membrane (GO:0005774);; Biological Process: regulation of transcription, DNA-dep…	--	BTB/POZ and TAZ domain-containing protein 3 OS=Arabidopsis thaliana GN=BT3 PE=1 SV=2	PREDICTED: BTB/POZ and TAZ domain-containing protein 3-like [Fragaria vesca subsp. vesca]
gi_351624107_gb_JP478408.1	9.79e-05	-1.21616	down	--	--	Molecular Function: protein kinase activity (GO:0004672);; Molecular Function: binding (GO:0005488);; Cellular Component: extracellular region (GO:0005576);; Cellular Component: cell wall (GO:0005618);; Biological Process: cellular process (GO:0009987);;	--	Epidermis-specific secreted glycoprotein EP1 OS=Daucus carota GN=EP1 PE=1 SV=1	PREDICTED: epidermis-specific secreted glycoprotein EP1-like [Fragaria vesca subsp. vesca]
gi_351628326_gb_JP481209.1	6.76e-07	-1.21605	down	[RTKL]	--	Molecular Function: ATP binding (GO:0005524);; Cellular Component: nucleus (GO:0005634);; Cellular Component: nucleolus (GO:0005730);; Cellular Component: cytosol (GO:0005829);; Cellular Component: plasma membrane (GO:0005886);; Biological Process: mRNA processing (GO:0006397);; Biological Process: protein phosphorylation (GO:0006468);; Molecular Function: RNA polymerase II carboxy-terminal domai…	--	Probable serine/threonine-protein kinase At1g54610 OS=Arabidopsis thaliana GN=At1g54610 PE=1 SV=1	Kinase superfamily protein [Theobroma cacao]
gi_351612031_gb_JP466332.1	8.98e-06	-1.21465	down	--	--	--	--	--	PREDICTED: uncharacterized protein LOC101302087 [Fragaria vesca subsp. vesca]
gi_351623872_gb_JP478173.1	5.01e-06	-1.20741	down	--	--	Molecular Function: nucleic acid binding (GO:0003676);; Biological Process: flower development (GO:0009908);; Cellular Component: intracellular part (GO:0044424);; Biological Process: determination of dorsal/ventral asymmetry (GO:0048262);;	--	Transcription factor MYB1R1 OS=Solanum tuberosum PE=2 SV=1	hypothetical protein PRUPE_ppa009283mg [Prunus persica]
gi_351624003_gb_JP478304.1	2.14e-05	-1.20215	down	--	--	--	--	Protein LURP-one-related 11 OS=Arabidopsis thaliana GN=At3g14260 PE=2 SV=1	hypothetical protein PRUPE_ppa012092mg [Prunus persica]
gi_351595945_gb_JP450505.1	6.9e-07	-1.2011	down	[RTKL]	--	Biological Process: polysaccharide catabolic process (GO:0000272);; Biological Process: respiratory burst involved in defense response (GO:0002679);; Molecular Function: structural constituent of ribosome (GO:0003735);; Molecular Function: protein serine/threonine kinase activity (GO:0004674);; Molecular Function: ATP binding (GO:0005524);; Cellular Component: vacuolar membrane (GO:0005774);; Cel…	--	Probable inactive receptor kinase At1g48480 OS=Arabidopsis thaliana GN=RKL1 PE=1 SV=1	hypothetical protein PRUPE_ppa002536mg [Prunus persica]
gi_351617668_gb_JP471969.1	0.00576905	-1.19755	down	--	--	Molecular Function: transporter activity (GO:0005215);; Cellular Component: nucleus (GO:0005634);; Cellular Component: Golgi apparatus (GO:0005794);; Biological Process: transport (GO:0006810);; Biological Process: negative regulation of defense response (GO:0031348);; Biological Process: cell wall biogenesis (GO:0042546);; Cellular Component: intracellular membrane-bounded organelle (GO:0043231)…	--	Random slug protein 5 OS=Dictyostelium discoideum GN=rsc5 PE=2 SV=1	hypothetical protein PRUPE_ppa008296mg [Prunus persica]
gi_351591307_gb_JP449755.1	0.000127043	-1.19437	down	--	--	Biological Process: translation (GO:0006412);; Cellular Component: chloroplast thylakoid membrane (GO:0009535);; Cellular Component: chloroplast envelope (GO:0009941);; Cellular Component: plastoglobule (GO:0010287);; Molecular Function: ligase activity, forming aminoacyl-tRNA and related compounds (GO:0016876);; Biological Process: tRNA aminoacylation (GO:0043039);; Molecular Function: organic c…	--	Uncharacterized protein At4g01150, chloroplastic OS=Arabidopsis thaliana GN=At4g01150 PE=1 SV=1	hypothetical protein PRUPE_ppa011635mg [Prunus persica]
gi_351599451_gb_JP453945.1	0.00123941	-1.19263	down	--	--	Biological Process: cytokinesis by cell plate formation (GO:0000911);; Molecular Function: guanyl-nucleotide exchange factor activity (GO:0005085);; Molecular Function: protein binding (GO:0005515);; Molecular Function: GTP binding (GO:0005525);; Cellular Component: nucleus (GO:0005634);; Cellular Component: cytosol (GO:0005829);; Cellular Component: plasma membrane (GO:0005886);; Biological Proc…	--	Dedicator of cytokinesis protein 6 OS=Mus musculus GN=Dock6 PE=1 SV=4	PREDICTED: LOW QUALITY PROTEIN: dedicator of cytokinesis protein 7-like [Fragaria vesca subsp. vesca]
gi_351625637_gb_JP479938.1	0.000297642	-1.19091	down	--	--	Molecular Function: signal transducer activity (GO:0004871);; Cellular Component: plasma membrane (GO:0005886);; Biological Process: response to blue light (GO:0009637);; Biological Process: regulation of proton transport (GO:0010155);; Biological Process: protein autophosphorylation (GO:0046777);; Biological Process: system development (GO:0048731);;	--	BTB/POZ domain-containing protein At3g19850 OS=Arabidopsis thaliana GN=At3g19850 PE=2 SV=1	PREDICTED: BTB/POZ domain-containing protein At3g19850-like [Fragaria vesca subsp. vesca]
gi_351604599_gb_JP458949.1	0.000681288	-1.19024	down	--	--	Biological Process: G2/M transition of mitotic cell cycle (GO:0000086);; Molecular Function: chromatin binding (GO:0003682);; Molecular Function: sequence-specific DNA binding transcription factor activity (GO:0003700);; Molecular Function: peptide-aspartate beta-dioxygenase activity (GO:0004597);; Molecular Function: protein binding (GO:0005515);; Cellular Component: nucleus (GO:0005634);; Biolo…	--	Lysine-specific demethylase 8 OS=Salmo salar GN=kdm8 PE=2 SV=1	predicted protein [Populus trichocarpa]
gi_351612133_gb_JP466434.1	0.00690186	-1.18865	down	--	--	Biological Process: cell fate specification (GO:0001708);; Molecular Function: DNA binding (GO:0003677);; Molecular Function: sequence-specific DNA binding transcription factor activity (GO:0003700);; Molecular Function: protein binding (GO:0005515);; Cellular Component: nucleus (GO:0005634);; Biological Process: regulation of transcription, DNA-dependent (GO:0006355);; Biological Process: fatty …	--	Homeobox protein SBH1 OS=Glycine max GN=H1 PE=2 SV=1	KNOX/ELK homeobox transcription factor isoform 1 [Theobroma cacao]
gi_351611917_gb_JP466218.1	0.000380849	-1.18826	down	--	--	Cellular Component: cell wall (GO:0005618);; Cellular Component: vacuolar membrane (GO:0005774);; Biological Process: acetyl-CoA metabolic process (GO:0006084);; Biological Process: calcium ion transport (GO:0006816);; Biological Process: Golgi organization (GO:0007030);; Biological Process: pattern specification process (GO:0007389);; Biological Process: regulation of cell size (GO:0008361);; Ce…	--	Fasciclin-like arabinogalactan protein 1 OS=Arabidopsis thaliana GN=FLA1 PE=1 SV=1	PREDICTED: fasciclin-like arabinogalactan protein 1-like [Fragaria vesca subsp. vesca]
gi_351591414_gb_JP449861.1	4.16e-07	-1.18812	down	--	--	Biological Process: fatty acid beta-oxidation (GO:0006635);; Cellular Component: chloroplast (GO:0009507);; Biological Process: protein import into peroxisome matrix (GO:0016558);;	--	--	PREDICTED: uncharacterized protein LOC101509903 isoform X1 [Cicer arietinum]
gi_351623033_gb_JP477334.1	6.74e-05	-1.18276	down	--	--	Cellular Component: mitochondrion (GO:0005739);; Cellular Component: chloroplast thylakoid membrane (GO:0009535);;	--	--	conserved hypothetical protein [Ricinus communis]
gi_351617468_gb_JP471769.1	0.00398243	-1.18238	down	--	--	Biological Process: water transport (GO:0006833);; Biological Process: response to cold (GO:0009409);; Biological Process: response to light stimulus (GO:0009416);; Cellular Component: chloroplast (GO:0009507);; Cellular Component: chloroplast thylakoid membrane (GO:0009535);; Cellular Component: chloroplast stroma (GO:0009570);; Biological Process: response to salt stress (GO:0009651);; Biologic…	--	Unknown protein DS12 from 2D-PAGE of leaf, chloroplastic OS=Oryza sativa subsp. japonica GN=Os08g0242700 PE=2 SV=2	amino acid binding protein, putative [Ricinus communis]
gi_351595935_gb_JP450495.1	0.00716218	-1.18179	down	--	--	--	--	--	unknown [Populus trichocarpa]
gi_351627413_gb_JP480296.1	6.4e-05	-1.18172	down	--	--	Cellular Component: cytoplasm (GO:0005737);; Cellular Component: plasma membrane (GO:0005886);; Biological Process: protein targeting to membrane (GO:0006612);; Biological Process: oligopeptide transport (GO:0006857);; Biological Process: nucleotide transport (GO:0006862);; Biological Process: ER to Golgi vesicle-mediated transport (GO:0006888);; Biological Process: cellular membrane fusion (GO:0…	--	Oligopeptide transporter 1 OS=Arabidopsis thaliana GN=OPT1 PE=2 SV=1	PREDICTED: LOW QUALITY PROTEIN: oligopeptide transporter 1-like [Fragaria vesca subsp. vesca]
gi_351618516_gb_JP472817.1	4.59e-07	-1.18167	down	--	--	Cellular Component: cytoplasm (GO:0005737);; Cellular Component: intracellular membrane-bounded organelle (GO:0043231);; Biological Process: response to stimulus (GO:0050896);;	--	F-box/kelch-repeat protein At1g67480 OS=Arabidopsis thaliana GN=At1g67480 PE=2 SV=1	PREDICTED: F-box/kelch-repeat protein At1g67480 [Vitis vinifera]
gi_351595634_gb_JP450200.1	0.000103829	-1.17637	down	--	--	Molecular Function: carboxylesterase activity (GO:0004091);; Cellular Component: cytosol (GO:0005829);; Cellular Component: plasma membrane (GO:0005886);; Biological Process: systemic acquired resistance (GO:0009627);; Biological Process: response to organic substance (GO:0010033);; Biological Process: leaf senescence (GO:0010150);; Biological Process: chlorophyll a catabolic process (GO:0033310)…	--	Pheophorbidase OS=Raphanus sativus GN=PPD PE=1 SV=1	PREDICTED: methylesterase 17-like [Fragaria vesca subsp. vesca]
gi_351627482_gb_JP480365.1	0.000151734	-1.17552	down	--	--	Molecular Function: copper ion binding (GO:0005507);; Cellular Component: nucleus (GO:0005634);; Cellular Component: vacuole (GO:0005773);; Cellular Component: cytosol (GO:0005829);; Biological Process: sulfur compound metabolic process (GO:0006790);; Biological Process: organelle organization (GO:0006996);; Biological Process: cell adhesion (GO:0007155);; Biological Process: response to cold (GO…	--	Agglutinin OS=Castanea crenata PE=1 SV=1	Myrosinase-binding protein-like protein [Medicago truncatula]
gi_351611422_gb_JP465723.1	0.00526445	-1.17517	down	--	--	Cellular Component: plasma membrane (GO:0005886);; Biological Process: rRNA processing (GO:0006364);; Cellular Component: chloroplast thylakoid membrane (GO:0009535);; Cellular Component: photosystem I reaction center (GO:0009538);; Biological Process: plastid organization (GO:0009657);; Cellular Component: chloroplast envelope (GO:0009941);; Biological Process: photosystem II assembly (GO:001020…	K02693|2e-67|rcu:RCOM_1723530|photosystem I reaction center subunit IV A, chloroplast precursor	Photosystem I reaction center subunit IV B, chloroplastic OS=Nicotiana sylvestris GN=PSAEB PE=1 SV=1	photosystem I psaE [Morus alba var. multicaulis]
gi_351599790_gb_JP454275.1	0.00300074	-1.17208	down	--	--	Cellular Component: membrane (GO:0016020);; Biological Process: brassinosteroid biosynthetic process (GO:0016132);;	--	Ferric-chelate reductase 1 OS=Bos taurus GN=FRRS1 PE=2 SV=1	Cytochrome b561/ferric reductase transmembrane with DOMON related domain, putative [Theobroma cacao]
gi_351625714_gb_JP480015.1	5.4e-07	-1.16746	down	--	--	Biological Process: metabolic process (GO:0008152);; Biological Process: catabolic process (GO:0009056);; Cellular Component: plant-type cell wall (GO:0009505);; Biological Process: proline transport (GO:0015824);; Biological Process: cellular component organization (GO:0016043);; Molecular Function: hydrolase activity, acting on ester bonds (GO:0016788);; Biological Process: regulation of metabo…	K01051|0.0|pop:POPTR_822767|pectinesterase family protein (EC:3.1.1.11)	Pectinesterase/pectinesterase inhibitor OS=Ficus pumila var. awkeotsang PE=1 SV=1	hypothetical protein PRUPE_ppa003697mg [Prunus persica]
gi_351622762_gb_JP477063.1	0.00135544	-1.16642	down	--	--	Cellular Component: anchored to membrane (GO:0031225);;	--	--	Cupredoxin superfamily protein isoform 1 [Theobroma cacao]
gi_351597633_gb_JP452175.1	0.00345777	-1.16516	down	--	--	Biological Process: negative regulation of programmed cell death (GO:0043069);; Biological Process: response to stimulus (GO:0050896);;	--	Metacaspase-1 OS=Arabidopsis thaliana GN=AMC1 PE=1 SV=1	PREDICTED: metacaspase-1-like [Fragaria vesca subsp. vesca]
gi_351606133_gb_JP460466.1	0.00307998	-1.16299	down	--	--	Biological Process: nitrogen compound metabolic process (GO:0006807);; Biological Process: multicellular organismal development (GO:0007275);; Biological Process: flavonoid biosynthetic process (GO:0009813);; Molecular Function: N-acyltransferase activity (GO:0016410);; Molecular Function: O-acetyltransferase activity (GO:0016413);; Molecular Function: transferase activity (GO:0016740);; Biologic…	--	Vinorine synthase OS=Rauvolfia serpentina GN=ACT PE=1 SV=2	PREDICTED: BAHD acyltransferase At5g47980-like [Fragaria vesca subsp. vesca]
gi_351628547_gb_JP481430.1	0.0053234	-1.16287	down	--	--	Cellular Component: extracellular region (GO:0005576);; Cellular Component: plant-type cell wall (GO:0009505);; Cellular Component: plasmodesma (GO:0009506);; Biological Process: root morphogenesis (GO:0010015);; Biological Process: response to karrikin (GO:0080167);;	--	--	PREDICTED: uncharacterized protein LOC100261739 [Vitis vinifera]
gi_351597499_gb_JP452044.1	1.51e-05	-1.16081	down	--	--	Molecular Function: protein binding (GO:0005515);; Cellular Component: nucleus (GO:0005634);;	--	--	DNA double-strand break repair rad50 ATPase [Theobroma cacao]
gi_351606867_gb_JP461192.1	0.00438385	-1.15563	down	--	--	Biological Process: developmental process involved in reproduction (GO:0003006);; Molecular Function: nucleic acid binding (GO:0003676);; Biological Process: response to stress (GO:0006950);; Biological Process: signal transduction (GO:0007165);; Biological Process: multicellular organismal development (GO:0007275);; Biological Process: response to light stimulus (GO:0009416);; Biological Process…	--	Zinc finger protein ZAT4 OS=Arabidopsis thaliana GN=ZAT4 PE=2 SV=1	PREDICTED: zinc finger protein ZAT4-like [Fragaria vesca subsp. vesca]
gi_351599347_gb_JP453844.1	0.00770693	-1.15523	down	[GC]	--	Cellular Component: cytosol (GO:0005829);; Biological Process: amino acid transport (GO:0006865);; Biological Process: toxin catabolic process (GO:0009407);; Cellular Component: chloroplast (GO:0009507);; Biological Process: anthocyanin-containing compound biosynthetic process (GO:0009718);; Biological Process: response to ethylene stimulus (GO:0009723);; Biological Process: response to UV-B (GO:…	--	UDP-glycosyltransferase 73C1 OS=Arabidopsis thaliana GN=UGT73C1 PE=2 SV=1	PREDICTED: UDP-glycosyltransferase 73C1-like [Fragaria vesca subsp. vesca]
gi_351623452_gb_JP477753.1	0.0056929	-1.15439	down	--	--	Cellular Component: membrane (GO:0016020);;	--	--	hypothetical protein PRUPE_ppa024548mg [Prunus persica]
gi_351604122_gb_JP458476.1	0.000293919	-1.14957	down	--	--	Biological Process: anatomical structure morphogenesis (GO:0009653);; Biological Process: phenylpropanoid biosynthetic process (GO:0009699);; Biological Process: cellular component organization (GO:0016043);; Molecular Function: N-acyltransferase activity (GO:0016410);; Molecular Function: transferase activity, transferring acyl groups (GO:0016746);; Biological Process: primary metabolic process …	--	Uncharacterized acetyltransferase At3g50280 OS=Arabidopsis thaliana GN=At3g50280 PE=1 SV=1	hypothetical protein PRUPE_ppa005635mg [Prunus persica]
gi_351612557_gb_JP466858.1	0.00330515	-1.14664	down	--	--	Molecular Function: DNA binding (GO:0003677);; Molecular Function: sequence-specific DNA binding transcription factor activity (GO:0003700);; Molecular Function: protein binding (GO:0005515);; Cellular Component: nucleus (GO:0005634);; Biological Process: response to xenobiotic stimulus (GO:0009410);; Biological Process: response to water deprivation (GO:0009414);; Biological Process: gibberellin…	--	ZF-HD homeobox protein At4g24660 OS=Arabidopsis thaliana GN=At4g24660 PE=1 SV=1	Mini zinc finger 2 isoform 1 [Theobroma cacao]
gi_351595866_gb_JP450426.1	0.00025064	-1.14342	down	--	--	Biological Process: RNA splicing, via endonucleolytic cleavage and ligation (GO:0000394);; Cellular Component: endosome (GO:0005768);; Cellular Component: Golgi apparatus (GO:0005794);; Cellular Component: trans-Golgi network (GO:0005802);; Biological Process: methylation-dependent chromatin silencing (GO:0006346);; Biological Process: protein glycosylation (GO:0006486);; Molecular Function: acet…	--	Probable beta-1,3-galactosyltransferase 6 OS=Arabidopsis thaliana GN=B3GALT6 PE=2 SV=1	Galactosyltransferase family protein isoform 2 [Theobroma cacao]
gi_351623279_gb_JP477580.1	0.00465672	-1.14339	down	--	--	Molecular Function: peroxidase activity (GO:0004601);; Molecular Function: protein binding (GO:0005515);; Cellular Component: nucleus (GO:0005634);; Biological Process: pentose-phosphate shunt (GO:0006098);; Biological Process: rRNA processing (GO:0006364);; Biological Process: response to oxidative stress (GO:0006979);; Cellular Component: chloroplast thylakoid membrane (GO:0009535);; Cellular C…	K00434|1e-178|pop:POPTR_864655|hypothetical protein	Thylakoid lumenal 29 kDa protein, chloroplastic OS=Solanum lycopersicum GN=CLEB3J9 PE=3 SV=1	unnamed protein product [Vitis vinifera]
gi_351599573_gb_JP454063.1	0.000272555	-1.13931	down	[FR]	--	Molecular Function: hydrolase activity (GO:0016787);; Molecular Function: hydrolase activity, acting on carbon-nitrogen (but not peptide) bonds (GO:0016810);; Molecular Function: atrazine chlorohydrolase activity (GO:0018788);;	--	5-methylthioadenosine/S-adenosylhomocysteine deaminase OS=Methanosarcina barkeri (strain Fusaro / DSM 804) GN=mtaD PE=3 SV=1	hypothetical protein PRUPE_ppa005196mg [Prunus persica]
gi_351617900_gb_JP472201.1	1.72e-06	-1.13917	down	--	--	Molecular Function: DNA binding (GO:0003677);; Molecular Function: sequence-specific DNA binding transcription factor activity (GO:0003700);; Molecular Function: protein binding (GO:0005515);; Cellular Component: nucleus (GO:0005634);; Biological Process: regulation of transcription, DNA-dependent (GO:0006355);; Biological Process: response to hormone stimulus (GO:0009725);; Biological Process: a…	--	Auxin response factor 4 OS=Arabidopsis thaliana GN=ARF4 PE=1 SV=1	hypothetical protein PRUPE_ppa001557mg [Prunus persica]
gi_351612852_gb_JP467153.1	0.000378405	-1.13798	down	--	--	Molecular Function: nucleic acid binding (GO:0003676);; Molecular Function: binding (GO:0005488);; Cellular Component: nucleus (GO:0005634);; Biological Process: iron ion transport (GO:0006826);; Biological Process: regulation of meristem growth (GO:0010075);; Biological Process: cellular response to iron ion starvation (GO:0010106);; Biological Process: response to nitrate (GO:0010167);; Biologi…	--	Zinc finger protein MAGPIE OS=Arabidopsis thaliana GN=MGP PE=1 SV=1	C2H2L domain class transcription factor [Malus domestica]
gi_351603716_gb_JP458072.1	0.000482311	-1.13765	down	--	--	--	--	--	hypothetical protein PRUPE_ppa026104mg [Prunus persica]
gi_351597124_gb_JP451674.1	1.85e-05	-1.13702	down	--	--	Biological Process: cellular component organization (GO:0016043);; Biological Process: cell growth (GO:0016049);; Biological Process: cellular developmental process (GO:0048869);; Biological Process: developmental growth involved in morphogenesis (GO:0060560);; Biological Process: biological regulation (GO:0065007);;	--	Protein LONGIFOLIA 1 OS=Arabidopsis thaliana GN=LNG1 PE=1 SV=1	hypothetical protein PRUPE_ppa000735mg [Prunus persica]
gi_351628867_gb_JP481750.1	1.83e-05	-1.13483	down	[RTKL]	--	Molecular Function: nucleotide binding (GO:0000166);; Molecular Function: protein kinase activity (GO:0004672);; Molecular Function: protein serine/threonine kinase activity (GO:0004674);; Molecular Function: calmodulin binding (GO:0005516);; Cellular Component: vacuole (GO:0005773);; Cellular Component: plasma membrane (GO:0005886);; Biological Process: protein folding (GO:0006457);; Biological …	--	Probable LRR receptor-like serine/threonine-protein kinase At1g56140 OS=Arabidopsis thaliana GN=At1g56140 PE=1 SV=2	unnamed protein product [Vitis vinifera]
gi_351624031_gb_JP478332.1	1.38e-06	-1.1339	down	--	--	Cellular Component: chromosome (GO:0005694);; Cellular Component: nucleolus (GO:0005730);; Cellular Component: mitochondrion (GO:0005739);;	K11275|5e-69|vvi:100259836|hypothetical protein LOC100259836	Histone H1.2 OS=Arabidopsis thaliana GN=At2g30620 PE=1 SV=1	hypothetical protein VITISV_018553 [Vitis vinifera]
gi_351599509_gb_JP454002.1	7.33e-05	-1.13388	down	--	--	Biological Process: transcription, DNA-dependent (GO:0006351);; Biological Process: signal transduction (GO:0007165);; Biological Process: heart development (GO:0007507);; Molecular Function: cytoskeletal protein binding (GO:0008092);; Biological Process: organ morphogenesis (GO:0009887);; Biological Process: tissue development (GO:0009888);; Biological Process: regulation of metabolic process (G…	--	Myb-like protein V OS=Dictyostelium discoideum GN=mybV PE=4 SV=2	hypothetical protein PRUPE_ppa000661mg [Prunus persica]
gi_351615325_gb_JP469626.1	1.55e-06	-1.12836	down	--	--	Biological Process: response to stress (GO:0006950);;	--	--	predicted protein [Populus trichocarpa]
gi_351622653_gb_JP476954.1	6.15e-06	-1.12736	down	--	--	Molecular Function: DNA binding (GO:0003677);; Molecular Function: sequence-specific DNA binding transcription factor activity (GO:0003700);; Cellular Component: nucleus (GO:0005634);; Biological Process: regulation of transcription, DNA-dependent (GO:0006355);; Biological Process: fatty acid catabolic process (GO:0009062);; Biological Process: jasmonic acid metabolic process (GO:0009694);; Biolo…	--	Transcription factor UNE12 OS=Arabidopsis thaliana GN=UNE12 PE=2 SV=2	hypothetical protein PRUPE_ppa008172mg [Prunus persica]
gi_351599485_gb_JP453978.1	0.000886677	-1.1245	down	[MG]	--	Molecular Function: binding (GO:0005488);; Cellular Component: extracellular region (GO:0005576);; Biological Process: transcription, DNA-dependent (GO:0006351);; Biological Process: cell proliferation (GO:0008283);; Cellular Component: chloroplast thylakoid membrane (GO:0009535);; Cellular Component: chloroplast envelope (GO:0009941);; Biological Process: regulation of macromolecule biosynthetic…	--	Protein TIC 62, chloroplastic OS=Arabidopsis thaliana GN=TIC62 PE=1 SV=1	PREDICTED: protein TIC 62, chloroplastic-like [Fragaria vesca subsp. vesca]
gi_351599819_gb_JP454303.1	0.00754705	-1.12194	down	--	--	--	--	--	conserved hypothetical protein [Ricinus communis]
gi_351603714_gb_JP458070.1	7.54e-06	-1.12112	down	--	--	Molecular Function: copper ion transmembrane transporter activity (GO:0005375);; Molecular Function: iron ion transmembrane transporter activity (GO:0005381);; Molecular Function: zinc ion transmembrane transporter activity (GO:0005385);; Molecular Function: protein binding (GO:0005515);; Cellular Component: plasma membrane (GO:0005886);; Biological Process: protein targeting to vacuole (GO:00066…	K14709|0.0|rcu:RCOM_0797420|zinc/iron transporter, putative (EC:1.3.1.74)	Zinc transporter 4, chloroplastic OS=Arabidopsis thaliana GN=ZIP4 PE=2 SV=1	zinc/iron transporter, putative [Ricinus communis]
gi_351629185_gb_JP482068.1	0.000564586	-1.12103	down	--	--	Cellular Component: chloroplast (GO:0009507);; Cellular Component: photosystem II (GO:0009523);; Cellular Component: chloroplast thylakoid membrane (GO:0009535);; Biological Process: photosynthesis (GO:0015979);; Cellular Component: photosynthetic membrane (GO:0034357);; Cellular Component: membrane part (GO:0044425);;	K02721|3e-40|pop:POPTR_830089|photosystem I reaction center subunit V (PsaG)	Photosystem II reaction center W protein, chloroplastic OS=Spinacia oleracea GN=psbW PE=1 SV=1	hypothetical protein PRUPE_ppa012535mg [Prunus persica]
gi_351617965_gb_JP472266.1	0.000655048	-1.11974	down	--	--	Biological Process: very long-chain fatty acid metabolic process (GO:0000038);; Biological Process: sebaceous gland cell differentiation (GO:0001949);; Molecular Function: iron ion binding (GO:0005506);; Molecular Function: protein binding (GO:0005515);; Cellular Component: mitochondrion (GO:0005739);; Cellular Component: endoplasmic reticulum (GO:0005783);; Biological Process: fatty acid biosynt…	--	Fatty acid 2-hydroxylase 2 OS=Arabidopsis thaliana GN=FAH2 PE=1 SV=1	Fatty acid hydroxylase 1 isoform 2 [Theobroma cacao]
gi_351623568_gb_JP477869.1	0.00103286	-1.11949	down	[QR]	--	Biological Process: steroid biosynthetic process (GO:0006694);; Molecular Function: N-methyltransferase activity (GO:0008170);; Molecular Function: S-adenosylmethionine-dependent methyltransferase activity (GO:0008757);; Cellular Component: chloroplast (GO:0009507);; Biological Process: post-embryonic development (GO:0009791);; Biological Process: vitamin E biosynthetic process (GO:0010189);; Bio…	K05928|1e-166|ath:AT1G64970|G-TMT	Tocopherol O-methyltransferase, chloroplastic OS=Arabidopsis thaliana GN=VTE4 PE=2 SV=2	PREDICTED: probable tocopherol O-methyltransferase, chloroplastic-like [Cicer arietinum]
gi_351601062_gb_JP455515.1	0.0034841	-1.11745	down	--	--	Cellular Component: nucleus (GO:0005634);; Cellular Component: cytosol (GO:0005829);;	--	Uncharacterized protein At5g39570 OS=Arabidopsis thaliana GN=At5g39570 PE=1 SV=1	PREDICTED: uncharacterized protein At5g39570 [Vitis vinifera]
gi_351619895_gb_JP474196.1	3.87e-05	-1.11466	down	--	--	Molecular Function: nucleotide binding (GO:0000166);; Molecular Function: nucleic acid binding (GO:0003676);; Molecular Function: RNA binding (GO:0003723);; Biological Process: gene expression (GO:0010467);; Biological Process: system development (GO:0048731);; Biological Process: regulation of cellular process (GO:0050794);;	--	RNA-binding protein 24-B OS=Xenopus laevis GN=rbm24-b PE=2 SV=1	RNA-binding family protein isoform 1 [Theobroma cacao]
gi_351618078_gb_JP472379.1	0.000198456	-1.11435	down	--	--	Molecular Function: RNA binding (GO:0003723);; Cellular Component: chloroplast (GO:0009507);; Cellular Component: ribonucleoprotein complex (GO:0030529);;	--	50S ribosomal protein 6, chloroplastic OS=Arabidopsis thaliana GN=PSRP6 PE=3 SV=1	PREDICTED: 50S ribosomal protein 6, chloroplastic-like [Fragaria vesca subsp. vesca]
gi_351623168_gb_JP477469.1	0.00101925	-1.11357	down	--	--	Molecular Function: sequence-specific DNA binding transcription factor activity (GO:0003700);; Cellular Component: nucleus (GO:0005634);; Biological Process: regulation of transcription, DNA-dependent (GO:0006355);;	--	--	conserved hypothetical protein [Ricinus communis]
gi_351595865_gb_JP450425.1	0.000283422	-1.10914	down	--	--	Molecular Function: two-component response regulator activity (GO:0000156);; Molecular Function: DNA binding (GO:0003677);; Molecular Function: sequence-specific DNA binding transcription factor activity (GO:0003700);; Molecular Function: binding (GO:0005488);; Molecular Function: protein binding (GO:0005515);; Cellular Component: nucleus (GO:0005634);; Biological Process: rRNA processing (GO:000…	--	Myb family transcription factor APL OS=Arabidopsis thaliana GN=APL PE=2 SV=2	hypothetical protein PRUPE_ppa006561mg [Prunus persica]
gi_351612754_gb_JP467055.1	0.00014671	-1.10825	down	--	--	Cellular Component: 1-phosphatidylinositol-4-phosphate 3-kinase, class IA complex (GO:0005943);; Cellular Component: chloroplast thylakoid (GO:0009534);;	--	--	predicted protein [Populus trichocarpa]
gi_351598692_gb_JP453204.1	3.49e-06	-1.10699	down	[RTKL]	--	Biological Process: polysaccharide biosynthetic process (GO:0000271);; Molecular Function: peptide receptor activity (GO:0001653);; Molecular Function: protein serine/threonine kinase activity (GO:0004674);; Molecular Function: ATP binding (GO:0005524);; Cellular Component: extracellular region (GO:0005576);; Cellular Component: plasma membrane (GO:0005886);; Biological Process: protein phosphory…	--	Probable LRR receptor-like serine/threonine-protein kinase At4g30520 OS=Arabidopsis thaliana GN=At4g30520 PE=2 SV=1	Leucine-rich repeat protein kinase family protein isoform 1 [Theobroma cacao]
gi_351612717_gb_JP467018.1	6.44e-06	-1.10647	down	--	--	Cellular Component: nucleus (GO:0005634);; Biological Process: regulation of translation (GO:0006417);; Biological Process: response to osmotic stress (GO:0006970);; Biological Process: response to water deprivation (GO:0009414);; Cellular Component: plasmodesma (GO:0009506);; Biological Process: response to external stimulus (GO:0009605);; Biological Process: response to auxin stimulus (GO:00097…	--	Auxin-responsive protein IAA26 OS=Arabidopsis thaliana GN=IAA26 PE=1 SV=2	hypothetical protein PRUPE_ppa007663mg [Prunus persica]
gi_351618853_gb_JP473154.1	0.000753811	-1.10565	down	--	--	--	--	Serum response factor homolog B OS=Dictyostelium discoideum GN=srfB PE=3 SV=1	hypothetical protein PRUPE_ppa005495mg [Prunus persica]
gi_351597080_gb_JP451632.1	0.00347684	-1.10139	down	--	--	Cellular Component: extracellular region (GO:0005576);; Cellular Component: cell wall (GO:0005618);; Biological Process: polyamine catabolic process (GO:0006598);; Cellular Component: chloroplast (GO:0009507);; Biological Process: systemic acquired resistance (GO:0009627);; Biological Process: lignan biosynthetic process (GO:0009807);; Biological Process: actin filament-based movement (GO:0030048…	--	Dirigent protein 21 OS=Arabidopsis thaliana GN=DIR21 PE=1 SV=1	unknown [Populus trichocarpa]
gi_351624390_gb_JP478691.1	7.78e-06	-1.09672	down	--	--	Molecular Function: structural molecule activity (GO:0005198);; Molecular Function: protein binding (GO:0005515);; Cellular Component: extracellular region (GO:0005576);; Cellular Component: nucleus (GO:0005634);; Biological Process: cellular membrane fusion (GO:0006944);; Biological Process: nervous system development (GO:0007399);; Biological Process: microsporogenesis (GO:0009556);; Cellular C…	--	Probable WRKY transcription factor 19 OS=Arabidopsis thaliana GN=WRKY19 PE=2 SV=1	PREDICTED: uncharacterized protein LOC101302269 [Fragaria vesca subsp. vesca]
gi_351595987_gb_JP450546.1	3.85e-06	-1.09632	down	--	--	Cellular Component: intracellular (GO:0005622);;	--	--	predicted protein [Populus trichocarpa]
gi_351621408_gb_JP475709.1	0.00652518	-1.09441	down	--	--	--	--	--	hypothetical protein PRUPE_ppa024582mg [Prunus persica]
gi_351621532_gb_JP475833.1	0.00416534	-1.08884	down	--	--	Biological Process: MAPK cascade (GO:0000165);; Molecular Function: DNA binding (GO:0003677);; Molecular Function: sequence-specific DNA binding transcription factor activity (GO:0003700);; Molecular Function: calmodulin binding (GO:0005516);; Cellular Component: nucleus (GO:0005634);; Cellular Component: cytoplasm (GO:0005737);; Biological Process: regulation of transcription, DNA-dependent (GO:…	K14431|1e-146|vvi:100255706|hypothetical protein LOC100255706	Transcription factor TGA7 OS=Arabidopsis thaliana GN=TGA7 PE=1 SV=1	PREDICTED: transcription factor TGA4 [Vitis vinifera]
gi_351603953_gb_JP458308.1	9.4e-06	-1.08773	down	--	--	Molecular Function: protein binding (GO:0005515);; Cellular Component: extracellular region (GO:0005576);; Biological Process: cellular component organization (GO:0016043);; Cellular Component: intracellular organelle (GO:0043229);;	--	Keratin, type I cytoskeletal 9 OS=Canis familiaris GN=KRT9 PE=3 SV=1	hypothetical protein PRUPE_ppa000222mg [Prunus persica]
gi_351623433_gb_JP477734.1	0.000300648	-1.08733	down	--	--	Cellular Component: cytoplasm (GO:0005737);; Biological Process: response to stress (GO:0006950);; Biological Process: pattern specification process (GO:0007389);; Biological Process: response to abiotic stimulus (GO:0009628);; Biological Process: anatomical structure morphogenesis (GO:0009653);; Biological Process: cellular process (GO:0009987);; Biological Process: organ development (GO:0048513…	--	Chaperone protein ClpB1 OS=Oryza sativa subsp. japonica GN=CLPB1 PE=2 SV=1	hypothetical protein PRUPE_ppa000646mg [Prunus persica]
gi_351599628_gb_JP454117.1	4.76e-06	-1.08625	down	--	--	Biological Process: MAPK cascade (GO:0000165);; Biological Process: respiratory burst involved in defense response (GO:0002679);; Molecular Function: peroxidase activity (GO:0004601);; Molecular Function: calcium ion binding (GO:0005509);; Cellular Component: nucleus (GO:0005634);; Cellular Component: Golgi apparatus (GO:0005794);; Cellular Component: integral to plasma membrane (GO:0005887);; Bi…	--	Putative respiratory burst oxidase homolog protein H OS=Arabidopsis thaliana GN=RBOHH PE=3 SV=1	PREDICTED: putative respiratory burst oxidase homolog protein H-like [Cicer arietinum]
gi_351620265_gb_JP474566.1	0.00969154	-1.08618	down	--	--	--	--	Peroxisomal membrane protein PEX14 OS=Dictyostelium discoideum GN=pex14 PE=3 SV=1	Uncharacterized protein isoform 1 [Theobroma cacao]
gi_351615351_gb_JP469652.1	1.36e-05	-1.08424	down	--	--	Molecular Function: protein binding (GO:0005515);; Biological Process: rRNA processing (GO:0006364);; Biological Process: regulation of translation (GO:0006417);; Biological Process: phosphatidylglycerol biosynthetic process (GO:0006655);; Biological Process: G-protein coupled receptor signaling pathway (GO:0007186);; Cellular Component: photosystem II (GO:0009523);; Cellular Component: plastid i…	--	Protein THYLAKOID FORMATION1, chloroplastic OS=Solanum tuberosum GN=THF1 PE=2 SV=1	hypothetical protein PRUPE_ppa009554mg [Prunus persica]
gi_351612089_gb_JP466390.1	1.09e-05	-1.08326	down	[RTKL]	--	Biological Process: polysaccharide biosynthetic process (GO:0000271);; Molecular Function: protein serine/threonine kinase activity (GO:0004674);; Molecular Function: non-membrane spanning protein tyrosine kinase activity (GO:0004715);; Molecular Function: ATP binding (GO:0005524);; Cellular Component: extracellular region (GO:0005576);; Cellular Component: plasma membrane (GO:0005886);; Biologic…	--	Protein NSP-INTERACTING KINASE 3 OS=Arabidopsis thaliana GN=NIK3 PE=1 SV=1	PREDICTED: protein NSP-INTERACTING KINASE 3-like [Fragaria vesca subsp. vesca]
gi_351607672_gb_JP461991.1	0.00134101	-1.07995	down	--	--	--	--	--	PREDICTED: DNA-binding protein BIN4-like [Fragaria vesca subsp. vesca]
gi_351619113_gb_JP473414.1	0.00581511	-1.07796	down	--	--	Molecular Function: DNA binding (GO:0003677);; Molecular Function: sequence-specific DNA binding transcription factor activity (GO:0003700);; Cellular Component: nucleus (GO:0005634);; Biological Process: regulation of transcription, DNA-dependent (GO:0006355);; Biological Process: anthocyanin-containing compound biosynthetic process (GO:0009718);; Biological Process: response to sucrose stimulus…	--	Transcription factor ILR3 OS=Arabidopsis thaliana GN=ILR3 PE=1 SV=1	hypothetical protein PRUPE_ppa010730mg [Prunus persica]
gi_351606826_gb_JP461151.1	0.000212951	-1.07788	down	[IQ]	--	Molecular Function: acetate-CoA ligase activity (GO:0003987);; Cellular Component: mitochondrion (GO:0005739);; Cellular Component: peroxisome (GO:0005777);; Biological Process: acetate metabolic process (GO:0006083);; Biological Process: glyoxylate cycle (GO:0006097);; Molecular Function: o-succinylbenzoate-CoA ligase activity (GO:0008756);; Cellular Component: chloroplast (GO:0009507);; Biologi…	--	Probable acyl-activating enzyme 1, peroxisomal OS=Arabidopsis thaliana GN=AAE1 PE=2 SV=1	acyl-activating enzyme 9 [Cannabis sativa]
gi_351624200_gb_JP478501.1	0.0017627	-1.07363	down	--	--	Molecular Function: protein binding (GO:0005515);; Biological Process: rRNA processing (GO:0006364);; Cellular Component: chloroplast thylakoid membrane (GO:0009535);; Cellular Component: photosystem I reaction center (GO:0009538);; Biological Process: plastid organization (GO:0009657);; Cellular Component: chloroplast envelope (GO:0009941);; Biological Process: photosystem II assembly (GO:001020…	K02692|1e-109|pop:POPTR_564827|PSAD photosystem I recation center subunit	Photosystem I reaction center subunit II, chloroplastic OS=Cucumis sativus GN=psaD PE=1 SV=1	photosystem I subunit PsaD [Glycine max]
gi_351591634_gb_JP450080.1	5.91e-05	-1.06331	down	--	--	Cellular Component: nucleolus (GO:0005730);; Biological Process: circadian rhythm (GO:0007623);; Biological Process: response to wounding (GO:0009611);; Biological Process: shade avoidance (GO:0009641);; Biological Process: chloroplast organization (GO:0009658);; Biological Process: response to hormone stimulus (GO:0009725);; Biological Process: coumarin biosynthetic process (GO:0009805);; Biolog…	--	Zinc finger protein CONSTANS-LIKE 15 OS=Arabidopsis thaliana GN=COL15 PE=2 SV=1	B-box type zinc finger protein with CCT domain, putative [Theobroma cacao]
gi_351597374_gb_JP451921.1	0.000479305	-1.06096	down	--	--	Cellular Component: vacuole (GO:0005773);;	--	StAR-related lipid transfer protein 7, mitochondrial OS=Mus musculus GN=Stard7 PE=2 SV=2	predicted protein [Populus trichocarpa]
gi_351619846_gb_JP474147.1	0.00453262	-1.06025	down	--	--	Cellular Component: nucleus (GO:0005634);; Biological Process: signal transduction (GO:0007165);; Biological Process: multicellular organismal development (GO:0007275);; Biological Process: anatomical structure morphogenesis (GO:0009653);; Biological Process: positive regulation of flower development (GO:0009911);; Biological Process: vegetative to reproductive phase transition of meristem (GO:00…	--	Histone-lysine N-methyltransferase, H3 lysine-36 and H4 lysine-20 specific OS=Mus musculus GN=Nsd1 PE=1 SV=1	PREDICTED: uncharacterized protein LOC100248222 [Vitis vinifera]
gi_351614273_gb_JP468574.1	8.52e-05	-1.05988	down	--	--	Cellular Component: chromosome (GO:0005694);; Cellular Component: nucleolus (GO:0005730);; Cellular Component: mitochondrion (GO:0005739);; Cellular Component: intracellular organelle (GO:0043229);;	K11275|6e-61|vvi:100259836|hypothetical protein LOC100259836	Histone H1 OS=Triticum aestivum PE=2 SV=2	PREDICTED: uncharacterized protein LOC101205659 [Cucumis sativus]
gi_351623681_gb_JP477982.1	0.00600876	-1.05856	down	--	--	Cellular Component: extracellular region (GO:0005576);;	--	--	conserved hypothetical protein [Ricinus communis]
gi_351621562_gb_JP475863.1	0.00834604	-1.05492	down	--	--	Biological Process: polysaccharide catabolic process (GO:0000272);; Molecular Function: hydrolase activity, hydrolyzing O-glycosyl compounds (GO:0004553);; Cellular Component: extracellular region (GO:0005576);; Cellular Component: cell wall (GO:0005618);; Biological Process: glucuronoxylan metabolic process (GO:0010413);; Molecular Function: endo-1,4-beta-xylanase activity (GO:0031176);; Biologi…	--	Endo-1,4-beta-xylanase A OS=Thermoanaerobacter saccharolyticum GN=xynA PE=1 SV=1	Glycosyl hydrolase family 10 protein / carbohydrate-binding domain-containing protein isoform 1 [Theobroma cacao]
gi_351618243_gb_JP472544.1	0.00256439	-1.05426	down	--	--	Molecular Function: sequence-specific DNA binding transcription factor activity (GO:0003700);; Molecular Function: binding (GO:0005488);; Cellular Component: nucleus (GO:0005634);; Biological Process: regulation of transcription, DNA-dependent (GO:0006355);; Biological Process: response to water deprivation (GO:0009414);; Biological Process: response to abscisic acid stimulus (GO:0009737);; Biolo…	--	BES1/BZR1 homolog protein 4 OS=Arabidopsis thaliana GN=BEH4 PE=1 SV=1	BES1/BZR1 [Theobroma cacao]
gi_351625210_gb_JP479511.1	0.00107862	-1.03773	down	--	--	Biological Process: regionalization (GO:0003002);; Cellular Component: early endosome (GO:0005769);; Cellular Component: Golgi apparatus (GO:0005794);; Cellular Component: trans-Golgi network (GO:0005802);; Cellular Component: plasma membrane (GO:0005886);; Biological Process: carbohydrate metabolic process (GO:0005975);; Biological Process: glycolysis (GO:0006096);; Biological Process: water tra…	--	Endoglucanase 25 OS=Arabidopsis thaliana GN=KOR PE=1 SV=1	cellulase1 [Pyrus communis]
gi_351605661_gb_JP460004.1	0.000659838	-1.03679	down	--	--	Biological Process: maltose metabolic process (GO:0000023);; Biological Process: starch catabolic process (GO:0005983);; Biological Process: protein dephosphorylation (GO:0006470);; Molecular Function: protein tyrosine/serine/threonine phosphatase activity (GO:0008138);; Cellular Component: chloroplast stroma (GO:0009570);; Molecular Function: carbohydrate phosphatase activity (GO:0019203);; Biol…	--	Phosphoglucan phosphatase LSF1, chloroplastic OS=Arabidopsis thaliana GN=LSF1 PE=1 SV=1	PREDICTED: phosphoglucan phosphatase LSF1, chloroplastic-like [Cucumis sativus]
gi_351614484_gb_JP468785.1	0.00149056	-1.03557	down	--	--	Cellular Component: plastid (GO:0009536);;	--	--	unknown [Lotus japonicus]
gi_351603881_gb_JP458236.1	0.00103348	-1.03237	down	--	--	Molecular Function: protein binding (GO:0005515);; Biological Process: response to jasmonic acid stimulus (GO:0009753);; Biological Process: hormone-mediated signaling pathway (GO:0009755);; Biological Process: regulation of defense response (GO:0031347);;	K13464|7e-90|pop:POPTR_661656|hypothetical protein	Protein TIFY 6B OS=Arabidopsis thaliana GN=TIFY6B PE=1 SV=1	hypothetical protein PRUPE_ppa008065mg [Prunus persica]
gi_351618051_gb_JP472352.1	0.00109503	-1.02642	down	--	--	Biological Process: developmental process involved in reproduction (GO:0003006);; Molecular Function: signal transducer activity (GO:0004871);; Cellular Component: plasma membrane (GO:0005886);; Biological Process: response to light stimulus (GO:0009416);; Biological Process: tropism (GO:0009606);; Biological Process: response to blue light (GO:0009637);; Biological Process: tissue development (G…	--	BTB/POZ domain-containing protein At5g66560 OS=Arabidopsis thaliana GN=At5g66560 PE=2 SV=2	hypothetical protein PRUPE_ppa002346mg [Prunus persica]
gi_351628437_gb_JP481320.1	0.00100606	-1.02376	down	--	--	Molecular Function: binding (GO:0005488);; Biological Process: defense response (GO:0006952);; Cellular Component: cell part (GO:0044464);;	--	Disease resistance protein RPM1 OS=Arabidopsis thaliana GN=RPM1 PE=1 SV=1	hypothetical protein PRUPE_ppa001015mg [Prunus persica]
gi_351597845_gb_JP452383.1	0.00575123	-1.02348	down	[GER]	--	Cellular Component: vacuolar membrane (GO:0005774);; Cellular Component: plasma membrane (GO:0005886);; Biological Process: amino acid transport (GO:0006865);; Biological Process: unidimensional cell growth (GO:0009826);; Biological Process: response to organic substance (GO:0010033);; Biological Process: regulation of hormone levels (GO:0010817);; Molecular Function: amino acid transmembrane tra…	--	WAT1-related protein At3g28050 OS=Arabidopsis thaliana GN=At3g28050 PE=2 SV=1	hypothetical protein PRUPE_ppa025053mg [Prunus persica]
gi_351599262_gb_JP453761.1	0.000297331	-1.01582	down	[RTKL]	--	Biological Process: immune system process (GO:0002376);; Molecular Function: protein kinase activity (GO:0004672);; Molecular Function: protein serine/threonine kinase activity (GO:0004674);; Molecular Function: binding (GO:0005488);; Cellular Component: nucleus (GO:0005634);; Cellular Component: vacuole (GO:0005773);; Cellular Component: plasma membrane (GO:0005886);; Biological Process: defense…	--	G-type lectin S-receptor-like serine/threonine-protein kinase At4g03230 OS=Arabidopsis thaliana GN=At4g03230 PE=3 SV=3	hypothetical protein PRUPE_ppa001380mg [Prunus persica]
gi_351605568_gb_JP459912.1	0.000225915	-1.01487	down	--	--	Molecular Function: nucleotide binding (GO:0000166);; Molecular Function: protein kinase activity (GO:0004672);; Molecular Function: protein serine/threonine kinase activity (GO:0004674);; Molecular Function: protein binding (GO:0005515);; Biological Process: cellular protein modification process (GO:0006464);; Biological Process: response to stress (GO:0006950);; Biological Process: signal trans…	--	Probable LRR receptor-like serine/threonine-protein kinase At1g14390 OS=Arabidopsis thaliana GN=At1g14390 PE=2 SV=1	hypothetical protein PRUPE_ppa001940mg [Prunus persica]
gi_351618846_gb_JP473147.1	0.00765244	-1.01135	down	--	--	Cellular Component: extracellular region (GO:0005576);; Biological Process: autophagy (GO:0006914);; Cellular Component: plasmodesma (GO:0009506);; Cellular Component: membrane (GO:0016020);; Biological Process: defense response to bacterium (GO:0042742);; Cellular Component: cell periphery (GO:0071944);;	--	Cysteine-rich repeat secretory protein 12 OS=Arabidopsis thaliana GN=CRRSP12 PE=2 SV=2	DUF26 domain-containing protein 1 precursor, putative [Ricinus communis]
gi_351605285_gb_JP459631.1	0.00142889	-1.00966	down	[GEPR]	--	Molecular Function: high-affinity hydrogen:glucose symporter activity (GO:0005358);; Cellular Component: plasma membrane (GO:0005886);; Biological Process: protein folding (GO:0006457);; Biological Process: purine nucleobase transport (GO:0006863);; Molecular Function: sucrose:hydrogen symporter activity (GO:0008506);; Biological Process: response to heat (GO:0009408);; Cellular Component: plasmo…	--	Sugar transport protein 13 OS=Arabidopsis thaliana GN=STP13 PE=1 SV=2	PREDICTED: sugar transport protein 13-like [Cucumis sativus]
gi_351601188_gb_JP455639.1	0.0089603	-1.0084	down	[RTKL]	--	Molecular Function: protein kinase activity (GO:0004672);; Molecular Function: protein serine/threonine kinase activity (GO:0004674);; Molecular Function: ATP binding (GO:0005524);; Cellular Component: plasma membrane (GO:0005886);; Biological Process: protein phosphorylation (GO:0006468);; Biological Process: cation transport (GO:0006812);; Biological Process: anion transport (GO:0006820);; Biol…	--	Probable LRR receptor-like serine/threonine-protein kinase At1g67720 OS=Arabidopsis thaliana GN=At1g67720 PE=2 SV=1	hypothetical protein PRUPE_ppa001029mg [Prunus persica]
gi_351621955_gb_JP476256.1	0.00151678	-1.00567	down	--	--	Molecular Function: sequence-specific DNA binding transcription factor activity (GO:0003700);; Molecular Function: protein binding (GO:0005515);; Cellular Component: nucleus (GO:0005634);; Cellular Component: cytosol (GO:0005829);; Biological Process: cell adhesion (GO:0007155);; Biological Process: response to light stimulus (GO:0009416);; Biological Process: detection of cytokinin stimulus (GO:…	--	Homeobox protein HD1 OS=Brassica napus GN=HD1 PE=2 SV=1	KNOTTED-like homeobox of 7 [Theobroma cacao]
gi_351600151_gb_JP454626.1	0.000128151	1.00252	up	--	--	Cellular Component: plant-type cell wall (GO:0009505);; Cellular Component: membrane (GO:0016020);;	--	--	PREDICTED: uncharacterized protein LOC100810770 [Glycine max]
gi_351615691_gb_JP469992.1	0.000191575	1.00408	up	--	--	Cellular Component: intracellular (GO:0005622);; Biological Process: protein targeting to mitochondrion (GO:0006626);;	--	Cell growth-regulating nucleolar protein OS=Homo sapiens GN=LYAR PE=1 SV=2	Zinc ion binding, putative isoform 1 [Theobroma cacao]
gi_351597414_gb_JP451960.1	8.98e-05	1.0054	up	[OC]	--	Cellular Component: nucleus (GO:0005634);; Cellular Component: cytosol (GO:0005829);; Biological Process: multicellular organismal development (GO:0007275);; Biological Process: sensory perception (GO:0007600);; Biological Process: pollen tube growth (GO:0009860);; Biological Process: pollen tube guidance (GO:0010183);; Biological Process: negative regulation of macromolecule metabolic process (G…	--	Probable nucleoredoxin 1 OS=Arabidopsis thaliana GN=At1g60420 PE=1 SV=1	protein disulfide isomerase (PDI)-like protein 3 [Cucumis melo]
gi_351617797_gb_JP472098.1	5.79e-05	1.00699	up	--	--	--	--	Serine-rich adhesin for platelets OS=Staphylococcus aureus (strain COL) GN=sraP PE=3 SV=1	hypothetical protein PRUPE_ppa023132mg [Prunus persica]
gi_351618111_gb_JP472412.1	0.00159422	1.01826	up	--	--	Molecular Function: DNA binding (GO:0003677);; Molecular Function: sequence-specific DNA binding transcription factor activity (GO:0003700);; Cellular Component: nucleus (GO:0005634);; Biological Process: regulation of transcription, DNA-dependent (GO:0006355);; Biological Process: glycine catabolic process (GO:0006546);; Biological Process: unsaturated fatty acid biosynthetic process (GO:0006636…	--	Transcription factor PIF1 OS=Arabidopsis thaliana GN=PIF1 PE=1 SV=1	unnamed protein product [Vitis vinifera]
gi_351621925_gb_JP476226.1	0.000343926	1.02266	up	--	--	Cellular Component: cell part (GO:0044464);; Biological Process: response to stimulus (GO:0050896);;	--	Universal stress protein A-like protein OS=Arabidopsis thaliana GN=At3g01520 PE=1 SV=2	PREDICTED: uncharacterized protein C167.05-like isoform 1 [Vitis vinifera]
gi_351616865_gb_JP471166.1	3.82e-05	1.02386	up	[RTKL]	--	Molecular Function: nucleotide binding (GO:0000166);; Molecular Function: protein kinase activity (GO:0004672);; Biological Process: cellular protein modification process (GO:0006464);; Biological Process: phosphate-containing compound metabolic process (GO:0006796);; Biological Process: signal transduction (GO:0007165);; Biological Process: cellular component organization (GO:0016043);; Molecula…	--	Probable L-type lectin-domain containing receptor kinase S.7 OS=Arabidopsis thaliana GN=LECRKS7 PE=2 SV=1	PREDICTED: probable L-type lectin-domain containing receptor kinase S.7-like [Fragaria vesca subsp. vesca]
gi_351613442_gb_JP467743.1	0.00152433	1.02432	up	--	--	Cellular Component: cytosol (GO:0005829);; Cellular Component: plasma membrane (GO:0005886);; Biological Process: response to desiccation (GO:0009269);; Biological Process: response to cold (GO:0009409);; Biological Process: response to wounding (GO:0009611);; Biological Process: response to high light intensity (GO:0009644);; Biological Process: response to abscisic acid stimulus (GO:0009737);; …	--	Late embryogenesis abundant protein Lea14-A OS=Gossypium hirsutum GN=LEA14-A PE=2 SV=1	unknown [Lotus japonicus]
gi_351612777_gb_JP467078.1	2.28e-05	1.02553	up	--	--	Biological Process: respiratory burst involved in defense response (GO:0002679);; Molecular Function: sequence-specific DNA binding transcription factor activity (GO:0003700);; Molecular Function: protein binding (GO:0005515);; Cellular Component: nucleolus (GO:0005730);; Cellular Component: cytoplasm (GO:0005737);; Biological Process: transcription, DNA-dependent (GO:0006351);; Biological Proces…	--	Ethylene-responsive transcription factor RAP2-4 OS=Arabidopsis thaliana GN=RAP2-4 PE=1 SV=1	putative dehydration-responsive element binding protein [Broussonetia papyrifera]
gi_351614726_gb_JP469027.1	0.00364159	1.02555	up	--	--	Cellular Component: mitochondrion (GO:0005739);; Biological Process: protein targeting to mitochondrion (GO:0006626);; Biological Process: fatty acid metabolic process (GO:0006631);; Molecular Function: electron carrier activity (GO:0009055);; Biological Process: toxin catabolic process (GO:0009407);; Biological Process: response to cyclopentenone (GO:0010583);; Molecular Function: protein disulf…	K05309|1e-140|pop:POPTR_860476|hypothetical protein	Prostaglandin E synthase 2 OS=Danio rerio GN=ptges2 PE=2 SV=1	hypothetical protein PRUPE_ppa008706mg [Prunus persica]
gi_351623392_gb_JP477693.1	2.47e-05	1.02859	up	--	--	Cellular Component: Golgi apparatus (GO:0005794);; Cellular Component: cytosol (GO:0005829);; Cellular Component: plant-type cell wall (GO:0009505);; Cellular Component: plasmodesma (GO:0009506);; Cellular Component: chloroplast (GO:0009507);; Cellular Component: membrane (GO:0016020);; Biological Process: response to arsenic-containing substance (GO:0046685);;	--	--	predicted protein [Populus trichocarpa]
gi_351623792_gb_JP478093.1	0.00572638	1.0292	up	--	--	--	--	--	RRNA intron-encoded homing endonuclease [Medicago truncatula]
gi_351620120_gb_JP474421.1	0.00133421	1.03069	up	--	--	Cellular Component: nucleus (GO:0005634);; Cellular Component: cytoplasm (GO:0005737);; Biological Process: cellular process (GO:0009987);; Molecular Function: phosphotransferase activity, alcohol group as acceptor (GO:0016773);;	--	Symplekin OS=Homo sapiens GN=SYMPK PE=1 SV=2	hypothetical protein VITISV_001105 [Vitis vinifera]
gi_351629146_gb_JP482029.1	0.000486515	1.04002	up	--	--	--	--	Uncharacterized protein At5g41620 OS=Arabidopsis thaliana GN=At5g41620 PE=1 SV=2	PREDICTED: uncharacterized protein At5g41620-like [Vitis vinifera]
gi_351597611_gb_JP452154.1	1.48e-05	1.04643	up	--	--	Cellular Component: nucleus (GO:0005634);; Cellular Component: cytoplasm (GO:0005737);; Cellular Component: SCF ubiquitin ligase complex (GO:0019005);; Biological Process: negative regulation of cytokinin mediated signaling pathway (GO:0080037);;	--	F-box/kelch-repeat protein At1g80440 OS=Arabidopsis thaliana GN=At1g80440 PE=2 SV=1	PREDICTED: F-box/kelch-repeat protein At1g80440 [Vitis vinifera]
gi_351617093_gb_JP471394.1	0.000724145	1.05465	up	--	--	Molecular Function: binding (GO:0005488);; Molecular Function: protein binding (GO:0005515);; Cellular Component: nucleus (GO:0005634);; Biological Process: response to cold (GO:0009409);; Biological Process: response to salt stress (GO:0009651);; Biological Process: response to ethylene stimulus (GO:0009723);; Biological Process: response to auxin stimulus (GO:0009733);; Biological Process: resp…	--	Protein CCA1 OS=Arabidopsis thaliana GN=CCA1 PE=1 SV=1	MYBR domain class transcription factor [Malus domestica]
gi_351601731_gb_JP456172.1	9.72e-05	1.06356	up	--	--	Molecular Function: catalytic activity (GO:0003824);; Molecular Function: protein binding (GO:0005515);; Cellular Component: cytoplasm (GO:0005737);; Cellular Component: cytoskeleton (GO:0005856);; Cellular Component: plasma membrane (GO:0005886);; Biological Process: signal transduction (GO:0007165);; Biological Process: metabolic process (GO:0008152);; Cellular Component: integral to membrane (…	--	LanC-like protein 2 OS=Homo sapiens GN=LANCL2 PE=1 SV=1	predicted protein [Populus trichocarpa]
gi_351624545_gb_JP478846.1	0.00019346	1.06425	up	--	--	Biological Process: negative regulation of transcription from RNA polymerase II promoter (GO:0000122);; Biological Process: branching involved in ureteric bud morphogenesis (GO:0001658);; Biological Process: neural tube closure (GO:0001843);; Biological Process: heart morphogenesis (GO:0003007);; Molecular Function: transmembrane signaling receptor activity (GO:0004888);; Molecular Function: patc…	K12385|0.0|rcu:RCOM_1601160|hedgehog receptor, putative	Niemann-Pick C1 protein OS=Homo sapiens GN=NPC1 PE=1 SV=2	PREDICTED: niemann-Pick C1 protein-like [Vitis vinifera]
gi_351606916_gb_JP461241.1	0.00689264	1.0661	up	--	--	Molecular Function: sequence-specific DNA binding transcription factor activity (GO:0003700);; Molecular Function: protein binding (GO:0005515);; Cellular Component: nucleus (GO:0005634);; Cellular Component: cytoplasm (GO:0005737);; Biological Process: amino acid transport (GO:0006865);; Biological Process: defense response (GO:0006952);; Biological Process: signal transduction (GO:0007165);; Mo…	K13424|1e-174|rcu:RCOM_0849600|transcription factor, putative	Probable WRKY transcription factor 33 OS=Arabidopsis thaliana GN=WRKY33 PE=1 SV=2	PREDICTED: probable WRKY transcription factor 33-like [Fragaria vesca subsp. vesca]
gi_351623450_gb_JP477751.1	0.000467632	1.07162	up	--	--	Cellular Component: intracellular (GO:0005622);; Cellular Component: nucleus (GO:0005634);; Biological Process: response to osmotic stress (GO:0006970);; Biological Process: circadian rhythm (GO:0007623);; Molecular Function: zinc ion binding (GO:0008270);; Biological Process: chloroplast organization (GO:0009658);; Biological Process: response to brassinosteroid stimulus (GO:0009741);; Biologica…	--	Salt tolerance protein OS=Arabidopsis thaliana GN=STO PE=1 SV=1	PREDICTED: salt tolerance protein [Vitis vinifera]
gi_351604165_gb_JP458518.1	5.52e-06	1.08508	up	--	--	Molecular Function: DNA binding (GO:0003677);; Molecular Function: protein binding (GO:0005515);; Cellular Component: nucleus (GO:0005634);; Cellular Component: cytoplasm (GO:0005737);; Biological Process: transcription, DNA-dependent (GO:0006351);; Biological Process: signal transduction (GO:0007165);; Biological Process: response to blue light (GO:0009637);; Molecular Function: sequence-specifi…	K09060|1e-173|vvi:100248302|hypothetical protein LOC100248302	Common plant regulatory factor 1 OS=Petroselinum crispum GN=CPRF1 PE=2 SV=1	hypothetical protein PRUPE_ppa006173mg [Prunus persica]
gi_351622069_gb_JP476370.1	0.000924666	1.09365	up	--	--	Cellular Component: Golgi apparatus (GO:0005794);; Biological Process: glycosaminoglycan biosynthetic process (GO:0006024);; Molecular Function: UDP-glycosyltransferase activity (GO:0008194);; Molecular Function: acetylglucosaminyltransferase activity (GO:0008375);; Cellular Component: integral to membrane (GO:0016021);; Biological Process: carbohydrate biosynthetic process (GO:0016051);; Molecul…	--	Xylosyltransferase 1 (Fragment) OS=Rattus norvegicus GN=Xylt1 PE=2 SV=1	hypothetical protein PRUPE_ppa006230mg [Prunus persica]
gi_351603954_gb_JP458309.1	0.00136801	1.09988	up	--	--	Molecular Function: aspartic-type endopeptidase activity (GO:0004190);; Cellular Component: extracellular region (GO:0005576);; Cellular Component: Golgi apparatus (GO:0005794);; Biological Process: proteolysis (GO:0006508);; Biological Process: cellular aromatic compound metabolic process (GO:0006725);; Biological Process: defense response (GO:0006952);; Molecular Function: peptidase activity (G…	--	Aspartic proteinase PCS1 OS=Arabidopsis thaliana GN=PCS1 PE=2 SV=1	predicted protein [Populus trichocarpa]
gi_351591256_gb_JP449705.1	0.000753524	1.10649	up	--	--	Molecular Function: sucrose alpha-glucosidase activity (GO:0004575);; Molecular Function: protein binding (GO:0005515);; Cellular Component: nucleus (GO:0005634);; Cellular Component: mitochondrion (GO:0005739);; Cellular Component: cytosol (GO:0005829);; Cellular Component: plasma membrane (GO:0005886);; Biological Process: starch metabolic process (GO:0005982);; Biological Process: sucrose cata…	--	Alkaline/neutral invertase CINV1 OS=Arabidopsis thaliana GN=CINV1 PE=1 SV=1	PREDICTED: uncharacterized protein LOC101292085 [Fragaria vesca subsp. vesca]
gi_351614811_gb_JP469112.1	6.87e-05	1.10917	up	--	--	Biological Process: RNA methylation (GO:0001510);; Molecular Function: structural constituent of ribosome (GO:0003735);; Cellular Component: cell wall (GO:0005618);; Cellular Component: nucleolus (GO:0005730);; Cellular Component: vacuolar membrane (GO:0005774);; Cellular Component: Golgi apparatus (GO:0005794);; Cellular Component: plasma membrane (GO:0005886);; Biological Process: translation (…	--	60S ribosomal protein L13-3 OS=Arabidopsis thaliana GN=RPL13D PE=2 SV=1	PREDICTED: 60S ribosomal protein L13-2-like [Solanum lycopersicum]
gi_351605549_gb_JP459893.1	0.00121897	1.11115	up	--	--	Cellular Component: nucleus (GO:0005634);; Cellular Component: endoplasmic reticulum (GO:0005783);; Biological Process: cell death (GO:0008219);; Biological Process: regulation of signal transduction (GO:0009966);; Cellular Component: endomembrane system (GO:0012505);; Molecular Function: enzyme binding (GO:0019899);; Biological Process: protein catabolic process (GO:0030163);; Cellular Component…	--	FAS-associated factor 2-A OS=Xenopus laevis GN=faf2-a PE=2 SV=1	PREDICTED: uncharacterized protein LOC101293230 [Fragaria vesca subsp. vesca]
gi_351611353_gb_JP465654.1	2.02e-05	1.11481	up	--	--	Biological Process: MAPK cascade (GO:0000165);; Biological Process: response to reactive oxygen species (GO:0000302);; Biological Process: protein targeting to membrane (GO:0006612);; Biological Process: response to cold (GO:0009409);; Cellular Component: chloroplast (GO:0009507);; Biological Process: response to wounding (GO:0009611);; Biological Process: abscisic acid mediated signaling pathway…	--	Indole-3-acetic acid-induced protein ARG2 OS=Vigna radiata var. radiata GN=ARG2 PE=2 SV=1	Indole-3-acetic acid-induced protein ARG2, putative [Theobroma cacao]
gi_351617961_gb_JP472262.1	7.06e-06	1.11505	up	--	--	Biological Process: nitrogen compound metabolic process (GO:0006807);; Molecular Function: O-acyltransferase activity (GO:0008374);; Biological Process: anatomical structure morphogenesis (GO:0009653);; Biological Process: flavonoid biosynthetic process (GO:0009813);; Biological Process: cellular component organization (GO:0016043);; Molecular Function: N-acyltransferase activity (GO:0016410);; M…	--	Vinorine synthase OS=Rauvolfia serpentina GN=ACT PE=1 SV=2	PREDICTED: vinorine synthase-like [Fragaria vesca subsp. vesca]
gi_351597218_gb_JP451768.1	0.00726718	1.12978	up	--	--	Molecular Function: protein binding (GO:0005515);; Cellular Component: plasma membrane (GO:0005886);; Cellular Component: plasmodesma (GO:0009506);; Biological Process: heat acclimation (GO:0010286);; Biological Process: metal ion transport (GO:0030001);; Molecular Function: metal ion binding (GO:0046872);;	--	Heavy metal-associated isoprenylated plant protein 26 OS=Arabidopsis thaliana GN=HIPP26 PE=1 SV=1	hypothetical protein CARUB_v10002466mg [Capsella rubella]
gi_351627864_gb_JP480747.1	0.00204789	1.13484	up	--	--	Molecular Function: N-acyltransferase activity (GO:0016410);; Molecular Function: O-acetyltransferase activity (GO:0016413);; Molecular Function: transferase activity (GO:0016740);; Biological Process: cellular nitrogen compound metabolic process (GO:0034641);; Biological Process: cellular biosynthetic process (GO:0044249);;	--	Vinorine synthase OS=Rauvolfia serpentina GN=ACT PE=1 SV=2	PREDICTED: vinorine synthase-like [Fragaria vesca subsp. vesca]
gi_351621914_gb_JP476215.1	0.00190067	1.13595	up	--	--	Molecular Function: ferric-chelate reductase activity (GO:0000293);; Biological Process: regulation of protein phosphorylation (GO:0001932);; Cellular Component: mitochondrial respiratory chain complex I (GO:0005747);; Cellular Component: plasma membrane (GO:0005886);; Biological Process: glycolysis (GO:0006096);; Biological Process: ubiquitin-dependent protein catabolic process (GO:0006511);; Bi…	K03937|2e-76|vvi:100250742|hypothetical protein LOC100250742	NADH dehydrogenase [ubiquinone] iron-sulfur protein 4, mitochondrial OS=Arabidopsis thaliana GN=FRO1 PE=2 SV=1	PREDICTED: NADH dehydrogenase [ubiquinone] iron-sulfur protein 4, mitochondrial-like [Cucumis sativus]
gi_351591607_gb_JP450053.1	0.00540468	1.14763	up	--	--	Molecular Function: calcium ion binding (GO:0005509);; Molecular Function: calcium-dependent phospholipid binding (GO:0005544);; Cellular Component: nuclear envelope (GO:0005635);; Cellular Component: nucleoplasm (GO:0005654);; Cellular Component: spindle (GO:0005819);; Cellular Component: cytosol (GO:0005829);; Biological Process: steroid biosynthetic process (GO:0006694);; Biological Process: p…	--	Annexin D5 OS=Arabidopsis thaliana GN=ANN5 PE=2 SV=2	PREDICTED: annexin D5 [Vitis vinifera]
gi_351608416_gb_JP462723.1	0.000194721	1.16768	up	--	--	Biological Process: response to reactive oxygen species (GO:0000302);; Cellular Component: mitochondrion (GO:0005739);; Biological Process: photoperiodism (GO:0009648);; Cellular Component: chloroplast inner membrane (GO:0009706);; Biological Process: leaf development (GO:0048366);;	--	Chitin-binding lectin 1 OS=Solanum tuberosum PE=1 SV=2	Reticulata-related 1 isoform 1 [Theobroma cacao]
gi_351597028_gb_JP451580.1	3.05e-06	1.17107	up	--	--	Cellular Component: nucleus (GO:0005634);; Biological Process: response to oxidative stress (GO:0006979);; Biological Process: response to cold (GO:0009409);; Biological Process: response to water deprivation (GO:0009414);; Biological Process: response to wounding (GO:0009611);; Biological Process: response to high light intensity (GO:0009644);; Biological Process: response to salt stress (GO:000…	--	Zinc finger protein ZAT10 OS=Arabidopsis thaliana GN=ZAT10 PE=2 SV=1	zinc finger protein, putative [Ricinus communis]
gi_351604070_gb_JP458424.1	1.09e-05	1.17129	up	--	--	Biological Process: MAPK cascade (GO:0000165);; Biological Process: response to hypoxia (GO:0001666);; Molecular Function: DNA binding (GO:0003677);; Molecular Function: sequence-specific DNA binding transcription factor activity (GO:0003700);; Cellular Component: nucleus (GO:0005634);; Biological Process: regulation of transcription, DNA-dependent (GO:0006355);; Biological Process: protein targe…	--	NAC domain-containing protein 2 OS=Arabidopsis thaliana GN=NAC002 PE=2 SV=2	NAC family transcription factor 5 [Morella rubra]
gi_351604317_gb_JP458669.1	0.00231505	1.17236	up	--	--	--	--	--	PREDICTED: uncharacterized protein LOC100255315 [Vitis vinifera]
gi_351623809_gb_JP478110.1	0.00747402	1.17775	up	--	--	Biological Process: cell morphogenesis involved in differentiation (GO:0000904);; Molecular Function: calcium ion binding (GO:0005509);; Cellular Component: peroxisome (GO:0005777);; Biological Process: signal transduction (GO:0007165);; Biological Process: double fertilization forming a zygote and endosperm (GO:0009567);; Biological Process: response to bacterium (GO:0009617);; Biological Proces…	--	Probable calcium-binding protein CML45 OS=Arabidopsis thaliana GN=CML45 PE=1 SV=1	PREDICTED: probable calcium-binding protein CML45-like [Fragaria vesca subsp. vesca]
gi_351612890_gb_JP467191.1	0.00125436	1.17807	up	--	--	Molecular Function: DNA binding (GO:0003677);; Molecular Function: chromatin binding (GO:0003682);; Molecular Function: sequence-specific DNA binding transcription factor activity (GO:0003700);; Cellular Component: nucleus (GO:0005634);; Biological Process: response to cold (GO:0009409);; Biological Process: response to red or far red light (GO:0009639);; Biological Process: response to salt stre…	--	Protein LHY OS=Arabidopsis thaliana GN=LHY PE=1 SV=2	transcription factor LHY [Populus nigra]
gi_351619762_gb_JP474063.1	3.26e-07	1.18919	up	--	--	Cellular Component: chromatin (GO:0000785);; Molecular Function: protein binding (GO:0005515);; Cellular Component: nucleus (GO:0005634);; Cellular Component: plasma membrane (GO:0005886);; Biological Process: DNA-dependent DNA replication (GO:0006261);; Biological Process: DNA methylation (GO:0006306);; Biological Process: chromatin silencing (GO:0006342);; Cellular Component: plasmodesma (GO:00…	--	Heavy metal-associated isoprenylated plant protein 26 OS=Arabidopsis thaliana GN=HIPP26 PE=1 SV=1	hypothetical protein PRUPE_ppa012978mg [Prunus persica]
gi_351612043_gb_JP466344.1	8.49e-07	1.19101	up	--	--	Cellular Component: mitochondrion (GO:0005739);; Biological Process: response to cold (GO:0009409);; Biological Process: response to water deprivation (GO:0009414);; Biological Process: response to abscisic acid stimulus (GO:0009737);; Biological Process: hyperosmotic salinity response (GO:0042538);;	--	--	hypothetical protein PRUPE_ppa015325mg [Prunus persica]
gi_351591688_gb_JP450134.1	0.00126691	1.19567	up	--	--	Molecular Function: aspartic-type endopeptidase activity (GO:0004190);; Biological Process: carbohydrate metabolic process (GO:0005975);; Biological Process: cellular aromatic compound metabolic process (GO:0006725);; Biological Process: defense response (GO:0006952);; Molecular Function: peptidase activity (GO:0008233);; Cellular Component: chloroplast (GO:0009507);; Biological Process: response…	--	Aspartic proteinase CDR1 OS=Arabidopsis thaliana GN=CDR1 PE=1 SV=1	hypothetical protein VITISV_015630 [Vitis vinifera]
gi_351600741_gb_JP455203.1	0.000218428	1.19592	up	--	--	--	--	--	PREDICTED: uncharacterized protein LOC101306469 [Fragaria vesca subsp. vesca]
gi_351625698_gb_JP479999.1	1.17e-05	1.21019	up	--	--	Cellular Component: chloroplast thylakoid lumen (GO:0009543);;	--	--	PREDICTED: uncharacterized protein LOC101308136 [Fragaria vesca subsp. vesca]
gi_351603990_gb_JP458344.1	0.000419195	1.21235	up	[RTKL]	--	Molecular Function: protein serine/threonine kinase activity (GO:0004674);; Molecular Function: non-membrane spanning protein tyrosine kinase activity (GO:0004715);; Molecular Function: calcium-dependent protein serine/threonine phosphatase activity (GO:0004723);; Molecular Function: calcium ion binding (GO:0005509);; Molecular Function: calmodulin binding (GO:0005516);; Molecular Function: ATP b…	--	Cysteine-rich receptor-like protein kinase 3 OS=Arabidopsis thaliana GN=CRK3 PE=2 SV=1	kinase, putative [Ricinus communis]
gi_351627700_gb_JP480583.1	0.000217876	1.21311	up	--	--	Molecular Function: nucleotide binding (GO:0000166);; Molecular Function: protein binding (GO:0005515);; Cellular Component: cytoplasm (GO:0005737);; Cellular Component: plasma membrane (GO:0005886);; Biological Process: cellular aromatic compound metabolic process (GO:0006725);; Biological Process: signal transduction (GO:0007165);; Biological Process: G-protein coupled receptor signaling pathwa…	--	Guanine nucleotide-binding protein alpha-2 subunit OS=Glycine max GN=GPA2 PE=2 SV=1	hypothetical protein PRUPE_ppa001077mg [Prunus persica]
gi_351610814_gb_JP465115.1	0.000388335	1.22568	up	--	--	--	--	--	predicted protein [Populus trichocarpa]
gi_351619092_gb_JP473393.1	0.0066629	1.22571	up	--	--	Molecular Function: protein binding (GO:0005515);; Cellular Component: cytosol (GO:0005829);; Biological Process: response to stress (GO:0006950);; Biological Process: lignin biosynthetic process (GO:0009809);; Biological Process: alkaloid biosynthetic process (GO:0009821);; Biological Process: positive regulation of flavonoid biosynthetic process (GO:0009963);; Biological Process: response to ni…	--	Omega-hydroxypalmitate O-feruloyl transferase OS=Arabidopsis thaliana GN=HHT1 PE=1 SV=1	Anthranilate N-benzoyltransferase protein, putative [Ricinus communis]
gi_351608370_gb_JP462677.1	0.0020921	1.22618	up	--	--	--	--	--	PREDICTED: uncharacterized protein LOC101246561 [Solanum lycopersicum]
gi_351609629_gb_JP463930.1	0.00153154	1.23114	up	[RTKL]	--	Biological Process: RNA splicing, via endonucleolytic cleavage and ligation (GO:0000394);; Biological Process: respiratory burst involved in defense response (GO:0002679);; Molecular Function: protein serine/threonine kinase activity (GO:0004674);; Molecular Function: transmembrane receptor protein tyrosine kinase activity (GO:0004714);; Molecular Function: protein binding (GO:0005515);; Molecula…	--	Probable receptor-like protein kinase At5g47070 OS=Arabidopsis thaliana GN=At5g47070 PE=1 SV=1	Receptor protein kinase isoform 1 [Theobroma cacao]
gi_351597561_gb_JP452106.1	2.09e-07	1.23177	up	--	--	Cellular Component: endosome (GO:0005768);; Cellular Component: Golgi apparatus (GO:0005794);; Cellular Component: trans-Golgi network (GO:0005802);;	--	Uncharacterized protein At1g04910 OS=Arabidopsis thaliana GN=At1g04910 PE=1 SV=1	hypothetical protein PRUPE_ppa004094mg [Prunus persica]
gi_351622379_gb_JP476680.1	0.000574046	1.24555	up	--	--	--	--	--	PREDICTED: uncharacterized protein LOC100248429 [Vitis vinifera]
gi_351591174_gb_JP449628.1	0.000879295	1.25268	up	--	--		--	Putative F-box/LRR-repeat protein At5g02930 OS=Arabidopsis thaliana GN=At5g02930 PE=4 SV=1	PREDICTED: F-box protein At3g59000-like [Solanum lycopersicum]
gi_351615669_gb_JP469970.1	0.00712737	1.25487	up	--	--	Biological Process: developmental process involved in reproduction (GO:0003006);; Molecular Function: DNA binding (GO:0003677);; Biological Process: regulation of transcription, DNA-dependent (GO:0006355);; Biological Process: response to oxidative stress (GO:0006979);; Biological Process: signal transduction (GO:0007165);; Biological Process: response to heat (GO:0009408);; Biological Process: r…	--	Zinc finger protein ZAT12 OS=Arabidopsis thaliana GN=ZAT12 PE=2 SV=1	C2H2L domain class transcription factor [Malus domestica]
gi_351617035_gb_JP471336.1	6.55e-08	1.26497	up	--	--	Molecular Function: aspartic-type endopeptidase activity (GO:0004190);; Molecular Function: protein binding (GO:0005515);; Cellular Component: endosome (GO:0005768);; Cellular Component: vacuolar membrane (GO:0005774);; Cellular Component: Golgi apparatus (GO:0005794);; Cellular Component: plasma membrane (GO:0005886);; Biological Process: proteolysis (GO:0006508);; Cellular Component: endosome m…	--	Signal peptide peptidase-like 4 OS=Arabidopsis thaliana GN=SPPL4 PE=2 SV=1	hypothetical protein PRUPE_ppa003988mg [Prunus persica]
gi_351600283_gb_JP454754.1	0.000143815	1.26753	up	--	--	Cellular Component: cell part (GO:0044464);;	--	--	Hydroxyproline-rich glycoprotein family protein, putative [Theobroma cacao]
gi_351619662_gb_JP473963.1	1.09e-06	1.28249	up	[RTKL]	--	Molecular Function: nucleotide binding (GO:0000166);; Biological Process: activation of MAPKK activity (GO:0000186);; Biological Process: activation of MAPK activity (GO:0000187);; Biological Process: defense response to oomycetes (GO:0002229);; Molecular Function: MAP kinase kinase kinase activity (GO:0004709);; Molecular Function: protein serine/threonine/tyrosine kinase activity (GO:0004712);;…	--	Serine/threonine-protein kinase HT1 OS=Arabidopsis thaliana GN=HT1 PE=1 SV=1	hypothetical protein PRUPE_ppa007843mg [Prunus persica]
gi_351623634_gb_JP477935.1	6.55e-08	1.28883	up	[RTKL]	--	Molecular Function: protein serine/threonine kinase activity (GO:0004674);; Molecular Function: protein binding (GO:0005515);; Molecular Function: ATP binding (GO:0005524);; Cellular Component: nucleus (GO:0005634);; Cellular Component: cytosol (GO:0005829);; Cellular Component: plasma membrane (GO:0005886);; Biological Process: sucrose metabolic process (GO:0005985);; Biological Process: protein…	K14498|0.0|rcu:RCOM_0855720|Serine/threonine-protein kinase SAPK3, putative (EC:2.7.11.1)	Serine/threonine-protein kinase SAPK3 OS=Oryza sativa subsp. japonica GN=SAPK3 PE=1 SV=1	Serine/threonine-protein kinase SAPK3, putative [Ricinus communis]
gi_351615879_gb_JP470180.1	0.00115914	1.29036	up	--	--	--	--	--	hypothetical protein PRUPE_ppa014227mg [Prunus persica]
gi_351621143_gb_JP475444.1	1.93e-08	1.29069	up	--	--	Molecular Function: protein binding (GO:0005515);; Cellular Component: nucleus (GO:0005634);; Cellular Component: cytoplasm (GO:0005737);; Cellular Component: membrane (GO:0016020);; Biological Process: cellular component organization (GO:0016043);; Molecular Function: carbohydrate binding (GO:0030246);; Biological Process: neurological system process (GO:0050877);; Cellular Component: cell perip…	--	Leucine-rich repeat extensin-like protein 3 OS=Arabidopsis thaliana GN=LRX3 PE=1 SV=1	unknown [Populus trichocarpa]
gi_351603912_gb_JP458267.1	0.00395054	1.29202	up	--	--	Cellular Component: plant-type cell wall (GO:0009505);; Biological Process: response to brassinosteroid stimulus (GO:0009741);;	--	--	Phosphate-responsive 1 family protein [Theobroma cacao]
gi_351618712_gb_JP473013.1	0.000212791	1.30403	up	--	--	Cellular Component: cell part (GO:0044464);;	--	Uncharacterized protein At1g76070 OS=Arabidopsis thaliana GN=At1g76070 PE=1 SV=1	Uncharacterized protein TCM_034301 [Theobroma cacao]
gi_351599092_gb_JP453596.1	9.79e-05	1.31236	up	[PR]	--	Biological Process: cysteine metabolic process (GO:0006534);; Biological Process: response to stress (GO:0006950);; Biological Process: protein localization (GO:0008104);; Biological Process: steroid metabolic process (GO:0008202);; Molecular Function: electron carrier activity (GO:0009055);; Cellular Component: chloroplast thylakoid (GO:0009534);; Biological Process: alkaloid metabolic process (…	--	Protochlorophyllide-dependent translocon component 52, chloroplastic OS=Arabidopsis thaliana GN=PTC52 PE=2 SV=1	ACD1-like [Theobroma cacao]
gi_351605921_gb_JP460261.1	0.00206758	1.31418	up	--	--	Molecular Function: catalytic activity (GO:0003824);; Molecular Function: protein kinase activity (GO:0004672);; Molecular Function: protein binding (GO:0005515);; Cellular Component: cytoplasm (GO:0005737);; Biological Process: cellular protein modification process (GO:0006464);; Biological Process: defense response (GO:0006952);; Biological Process: immune response (GO:0006955);; Biological Pro…	--	Receptor-like protein 12 OS=Arabidopsis thaliana GN=RLP12 PE=2 SV=2	PREDICTED: LRR receptor-like serine/threonine-protein kinase FLS2-like [Vitis vinifera]
gi_351621748_gb_JP476049.1	3.98e-06	1.31497	up	--	--	Molecular Function: DNA binding (GO:0003677);; Molecular Function: chromatin binding (GO:0003682);; Molecular Function: sequence-specific DNA binding transcription factor activity (GO:0003700);; Cellular Component: nucleus (GO:0005634);; Cellular Component: cytosol (GO:0005829);; Biological Process: regulation of transcription, DNA-dependent (GO:0006355);; Biological Process: response to stress (…	--	Transcription factor DIVARICATA OS=Antirrhinum majus GN=DIVARICATA PE=2 SV=1	hypothetical protein PRUPE_ppa010926mg [Prunus persica]
gi_351598375_gb_JP452900.1	2.66e-06	1.31564	up	--	--	--	--	--	protein with unknown function [Ricinus communis]
gi_351615908_gb_JP470209.1	6.42e-07	1.31996	up	--	--	Biological Process: maltose metabolic process (GO:0000023);; Molecular Function: glutathione transferase activity (GO:0004364);; Molecular Function: peroxidase activity (GO:0004601);; Cellular Component: nucleus (GO:0005634);; Cellular Component: cytoplasm (GO:0005737);; Cellular Component: vacuolar membrane (GO:0005774);; Cellular Component: Golgi apparatus (GO:0005794);; Cellular Component: cyt…	--	Probable glutathione S-transferase parC OS=Nicotiana tabacum GN=PARC PE=2 SV=1	glutathione-S-transferase [Brassica juncea]
gi_351616895_gb_JP471196.1	0.00150128	1.32657	up	--	--	Cellular Component: nucleus (GO:0005634);; Cellular Component: microtubule (GO:0005874);; Cellular Component: plasma membrane (GO:0005886);; Biological Process: double-strand break repair (GO:0006302);; Biological Process: mitotic recombination (GO:0006312);; Biological Process: methylation-dependent chromatin silencing (GO:0006346);; Biological Process: cytoskeleton organization (GO:0007010);; B…	--	Microtubule-associated protein 70-5 OS=Arabidopsis thaliana GN=MAP70.5 PE=1 SV=1	hypothetical protein PRUPE_ppa002850mg [Prunus persica]
gi_351598729_gb_JP453240.1	0.00755397	1.32877	up	--	--	Molecular Function: calmodulin binding (GO:0005516);; Cellular Component: nucleus (GO:0005634);;	--	--	PREDICTED: uncharacterized protein LOC101227697 [Cucumis sativus]
gi_351600179_gb_JP454651.1	0.00627941	1.33069	up	--	--	Cellular Component: extracellular region (GO:0005576);; Cellular Component: endosome (GO:0005768);; Cellular Component: Golgi apparatus (GO:0005794);; Cellular Component: trans-Golgi network (GO:0005802);; Biological Process: protein glycosylation (GO:0006486);; Biological Process: Notch signaling pathway (GO:0007219);; Molecular Function: transferase activity, transferring glycosyl groups (GO:00…	--	O-glucosyltransferase rumi homolog OS=Culex quinquefasciatus GN=CPIJ013394 PE=3 SV=1	PREDICTED: O-glucosyltransferase rumi homolog [Vitis vinifera]
gi_351622734_gb_JP477035.1	0.00114353	1.33125	up	--	--	Biological Process: skeletal system development (GO:0001501);; Cellular Component: endoplasmic reticulum membrane (GO:0005789);; Cellular Component: ribosome (GO:0005840);; Cellular Component: cytoplasmic microtubule (GO:0005881);; Biological Process: glucose metabolic process (GO:0006006);; Biological Process: activation of signaling protein activity involved in unfolded protein response (GO:000…	--	Stress-associated endoplasmic reticulum protein 2 OS=Mus musculus GN=Serp2 PE=3 SV=2	PREDICTED: stress-associated endoplasmic reticulum protein 2-like isoform 1 [Vitis vinifera]
gi_351627884_gb_JP480767.1	1.35e-07	1.33462	up	--	--	Cellular Component: Golgi membrane (GO:0000139);; Cellular Component: extracellular region (GO:0005576);; Cellular Component: cell wall (GO:0005618);; Cellular Component: endoplasmic reticulum membrane (GO:0005789);; Cellular Component: plasmodesma (GO:0009506);; Biological Process: response to organic substance (GO:0010033);; Cellular Component: apical plasma membrane (GO:0016324);; Molecular Fu…	K12349|0.0|rcu:RCOM_0085480|ceramidase, putative	Neutral ceramidase OS=Arabidopsis thaliana GN=At2g38010 PE=2 SV=1	Neutral/alkaline non-lysosomal ceramidase [Theobroma cacao]
gi_351608234_gb_JP462544.1	8.83e-07	1.33591	up	--	--	Biological Process: MAPK cascade (GO:0000165);; Molecular Function: protein binding (GO:0005515);; Cellular Component: cytoplasm (GO:0005737);; Biological Process: regulation of transcription, DNA-dependent (GO:0006355);; Biological Process: protein targeting to membrane (GO:0006612);; Molecular Function: electron carrier activity (GO:0009055);; Biological Process: response to cold (GO:0009409);;…	--	Glutaredoxin-C9 OS=Arabidopsis thaliana GN=GRXC9 PE=1 SV=1	Glutaredoxin-C9 [Medicago truncatula]
gi_351620925_gb_JP475226.1	5.39e-06	1.35381	up	--	--	--	--	--	hypothetical protein PRUPE_ppa011934mg [Prunus persica]
gi_351612295_gb_JP466596.1	0.000108389	1.35385	up	--	--	--	--	Probable ATP-dependent helicase PF08_0048 OS=Plasmodium falciparum (isolate 3D7) GN=PF08_0048 PE=3 SV=1	hypothetical protein PRUPE_ppa010795mg [Prunus persica]
gi_351619856_gb_JP474157.1	6.01e-06	1.3556	up	--	--	--	--	Uncharacterized serine-rich protein C215.13 OS=Schizosaccharomyces pombe (strain 972 / ATCC 24843) GN=SPBC215.13 PE=1 SV=1	hypothetical protein PRUPE_ppa001460mg [Prunus persica]
gi_351590889_gb_JP449347.1	0.00765374	1.35932	up	[RTKL]	--	Biological Process: MAPK cascade (GO:0000165);; Molecular Function: nucleotide binding (GO:0000166);; Biological Process: activation of MAPKK activity involved in osmosensory signaling pathway (GO:0000168);; Biological Process: activation of MAPK activity involved in osmosensory signaling pathway (GO:0000169);; Biological Process: cytokinesis, actomyosin contractile ring assembly (GO:0000915);; B…	--	Mitogen-activated protein kinase kinase kinase NPK1 OS=Nicotiana tabacum GN=NPK1 PE=1 SV=1	unnamed protein product [Vitis vinifera]
gi_351617435_gb_JP471736.1	0.00646555	1.36017	up	--	--	Molecular Function: binding (GO:0005488);; Biological Process: pattern specification process (GO:0007389);; Biological Process: petal development (GO:0048441);; Biological Process: floral organ morphogenesis (GO:0048444);; Biological Process: regulation of multicellular organismal process (GO:0051239);;	--	Trihelix transcription factor GTL2 OS=Arabidopsis thaliana GN=At5g28300 PE=2 SV=1	hypothetical protein PRUPE_ppa022417mg [Prunus persica]
gi_351599644_gb_JP454133.1	3.47e-09	1.36176	up	--	--	Biological Process: polysaccharide biosynthetic process (GO:0000271);; Molecular Function: sequence-specific DNA binding transcription factor activity (GO:0003700);; Molecular Function: protein serine/threonine kinase activity (GO:0004674);; Molecular Function: ATP binding (GO:0005524);; Cellular Component: nucleus (GO:0005634);; Cellular Component: cytosol (GO:0005829);; Cellular Component: plas…	--	Beta-amylase 1, chloroplastic OS=Arabidopsis thaliana GN=BAM1 PE=1 SV=1	PREDICTED: beta-amylase 1, chloroplastic-like [Cucumis sativus]
gi_351595629_gb_JP450195.1	0.00223671	1.36182	up	--	--	Biological Process: respiratory burst involved in defense response (GO:0002679);; Molecular Function: DNA binding (GO:0003677);; Molecular Function: sequence-specific DNA binding transcription factor activity (GO:0003700);; Cellular Component: nucleus (GO:0005634);; Cellular Component: nucleolus (GO:0005730);; Biological Process: response to cold (GO:0009409);; Biological Process: response to wat…	--	Ethylene-responsive transcription factor CRF2 OS=Arabidopsis thaliana GN=CRF2 PE=1 SV=1	hypothetical protein PRUPE_ppa025804mg [Prunus persica]
gi_351625316_gb_JP479617.1	0.000225594	1.37192	up	--	--	Biological Process: defense response (GO:0006952);; Molecular Function: S-adenosylmethionine-dependent methyltransferase activity (GO:0008757);; Biological Process: response to wounding (GO:0009611);; Molecular Function: transferase activity (GO:0016740);; Biological Process: response to other organism (GO:0051707);; Molecular Function: 2-phytyl-1,4-naphthoquinone methyltransferase activity (GO:0…	--	7-methylxanthosine synthase 1 OS=Coffea canephora GN=XMT1 PE=1 SV=1	carboxyl methyltransferase 4 [Humulus lupulus]
gi_351618335_gb_JP472636.1	4.94e-05	1.37552	up	--	--	Biological Process: polysaccharide biosynthetic process (GO:0000271);; Molecular Function: sequence-specific DNA binding transcription factor activity (GO:0003700);; Molecular Function: protein serine/threonine kinase activity (GO:0004674);; Molecular Function: ATP binding (GO:0005524);; Cellular Component: nucleus (GO:0005634);; Cellular Component: cytosol (GO:0005829);; Cellular Component: plas…	--	Beta-amylase 1, chloroplastic OS=Arabidopsis thaliana GN=BAM1 PE=1 SV=1	PREDICTED: beta-amylase 1, chloroplastic-like [Cucumis sativus]
gi_351617892_gb_JP472193.1	2.72e-09	1.3806	up	--	--	Molecular Function: sucrose alpha-glucosidase activity (GO:0004575);; Molecular Function: protein tyrosine phosphatase activity (GO:0004725);; Molecular Function: protein binding (GO:0005515);; Cellular Component: extracellular region (GO:0005576);; Cellular Component: nucleus (GO:0005634);; Cellular Component: mitochondrion (GO:0005739);; Cellular Component: cytosol (GO:0005829);; Cellular Compo…	--	Alkaline/neutral invertase CINV1 OS=Arabidopsis thaliana GN=CINV1 PE=1 SV=1	PREDICTED: uncharacterized protein LOC101292085 [Fragaria vesca subsp. vesca]
gi_351591204_gb_JP449658.1	0.000507284	1.40518	up	--	--	Molecular Function: hydrolase activity, hydrolyzing O-glycosyl compounds (GO:0004553);; Cellular Component: extracellular region (GO:0005576);; Cellular Component: cell wall (GO:0005618);; Biological Process: polysaccharide metabolic process (GO:0005976);; Biological Process: cellular glucan metabolic process (GO:0006073);; Cellular Component: plant-type cell wall (GO:0009505);; Cellular Componen…	K08235|1e-176|pop:POPTR_423757|hypothetical protein	Probable xyloglucan endotransglucosylase/hydrolase protein 30 OS=Arabidopsis thaliana GN=XTH30 PE=2 SV=2	PREDICTED: probable xyloglucan endotransglucosylase/hydrolase protein 30-like [Cucumis sativus]
gi_351603660_gb_JP458016.1	3.45e-10	1.42977	up	[QR]	--	Cellular Component: nucleus (GO:0005634);; Cellular Component: cytoplasm (GO:0005737);; Cellular Component: plasma membrane (GO:0005886);; Cellular Component: plasmodesma (GO:0009506);; Biological Process: lignin biosynthetic process (GO:0009809);; Molecular Function: luteolin O-methyltransferase activity (GO:0030744);; Molecular Function: quercetin 3-O-methyltransferase activity (GO:0030755);; M…	--	(RS)-norcoclaurine 6-O-methyltransferase OS=Coptis japonica PE=1 SV=1	o-methyltransferase, putative [Ricinus communis]
gi_351612055_gb_JP466356.1	0.000759903	1.43041	up	[GEPR]	--	Cellular Component: nucleus (GO:0005634);; Biological Process: response to karrikin (GO:0080167);;	--	Uncharacterized membrane protein YMR155W OS=Saccharomyces cerevisiae (strain ATCC 204508 / S288c) GN=YMR155W PE=1 SV=1	hypothetical protein PRUPE_ppa003638mg [Prunus persica]
gi_351628882_gb_JP481765.1	0.000306003	1.43151	up	--	--	Molecular Function: binding (GO:0005488);; Biological Process: response to stress (GO:0006950);; Biological Process: metabolic process (GO:0008152);; Biological Process: response to abiotic stimulus (GO:0009628);; Biological Process: cellular process (GO:0009987);; Cellular Component: intracellular membrane-bounded organelle (GO:0043231);;	--	BAG family molecular chaperone regulator 6 OS=Arabidopsis thaliana GN=BAG6 PE=1 SV=1	hypothetical protein PRUPE_ppa000511mg [Prunus persica]
gi_351612894_gb_JP467195.1	0.000421159	1.43973	up	--	--	Molecular Function: carboxylesterase activity (GO:0004091);; Molecular Function: cholinesterase activity (GO:0004104);; Molecular Function: alpha-L-fucosidase activity (GO:0004560);; Cellular Component: extracellular region (GO:0005576);; Biological Process: lipid metabolic process (GO:0006629);; Cellular Component: plant-type cell wall (GO:0009505);; Cellular Component: plasmodesma (GO:0009506);…	--	GDSL esterase/lipase At4g01130 OS=Arabidopsis thaliana GN=At4g01130 PE=2 SV=1	predicted protein [Populus trichocarpa]
gi_351621839_gb_JP476140.1	0.000549623	1.45066	up	[GEPR]	--	Cellular Component: plasma membrane (GO:0005886);; Biological Process: response to water deprivation (GO:0009414);; Biological Process: response to nematode (GO:0009624);; Biological Process: gravitropism (GO:0009630);; Cellular Component: plant-type vacuole membrane (GO:0009705);; Biological Process: response to zinc ion (GO:0010043);; Biological Process: basipetal auxin transport (GO:0010540);;…	--	Protein ZINC INDUCED FACILITATOR-LIKE 1 OS=Arabidopsis thaliana GN=ZIFL1 PE=2 SV=1	hypothetical protein PRUPE_ppa004919mg [Prunus persica]
gi_351621046_gb_JP475347.1	1.37e-09	1.47251	up	--	--	Molecular Function: DNA binding (GO:0003677);; Molecular Function: sequence-specific DNA binding transcription factor activity (GO:0003700);; Molecular Function: protein binding (GO:0005515);; Biological Process: regulation of transcription, DNA-dependent (GO:0006355);; Biological Process: transcription from RNA polymerase II promoter (GO:0006366);; Biological Process: response to water deprivati…	--	Nuclear transcription factor Y subunit A-9 OS=Arabidopsis thaliana GN=NFYA9 PE=2 SV=1	unnamed protein product [Vitis vinifera]
gi_351613820_gb_JP468121.1	2.57e-05	1.48034	up	--	--	--	--	--	protein with unknown function [Ricinus communis]
gi_351627821_gb_JP480704.1	0.000667734	1.48448	up	--	--	Cellular Component: nucleus (GO:0005634);; Cellular Component: endosome (GO:0005768);; Cellular Component: vacuolar membrane (GO:0005774);; Cellular Component: Golgi apparatus (GO:0005794);; Cellular Component: trans-Golgi network (GO:0005802);; Molecular Function: methyltransferase activity (GO:0008168);; Molecular Function: S-adenosylmethionine-dependent methyltransferase activity (GO:0008757);…	--	Probable methyltransferase PMT18 OS=Arabidopsis thaliana GN=At1g33170 PE=2 SV=1	ATP binding protein, putative [Ricinus communis]
gi_351622775_gb_JP477076.1	8.5e-06	1.48884	up	--	--	--	--	--	conserved hypothetical protein [Ricinus communis]
gi_351598680_gb_JP453193.1	0.000574046	1.49045	up	[RTKL]	--	Molecular Function: protein kinase activity (GO:0004672);; Molecular Function: protein serine/threonine kinase activity (GO:0004674);; Molecular Function: protein tyrosine kinase activity (GO:0004713);; Molecular Function: binding (GO:0005488);; Molecular Function: ATP binding (GO:0005524);; Cellular Component: plasma membrane (GO:0005886);; Biological Process: protein phosphorylation (GO:0006468…	--	G-type lectin S-receptor-like serine/threonine-protein kinase At5g24080 OS=Arabidopsis thaliana GN=At5g24080 PE=2 SV=1	hypothetical protein PRUPE_ppa021994mg [Prunus persica]
gi_351612179_gb_JP466480.1	3.41e-06	1.49189	up	[QR]	--	Cellular Component: nucleus (GO:0005634);; Cellular Component: cytosol (GO:0005829);; Cellular Component: plasma membrane (GO:0005886);; Biological Process: polyamine catabolic process (GO:0006598);; Molecular Function: O-methyltransferase activity (GO:0008171);; Cellular Component: plasmodesma (GO:0009506);; Biological Process: response to wounding (GO:0009611);; Biological Process: coumarin bio…	--	Anthranilate N-methyltransferase OS=Ruta graveolens PE=1 SV=1	hypothetical protein PRUPE_ppa007229mg [Prunus persica]
gi_351596720_gb_JP451275.1	4.67e-06	1.49518	up	--	--	--	--	--	Beta-galactosidase 3 isoform 4 [Theobroma cacao]
gi_351612830_gb_JP467131.1	2.96e-09	1.49743	up	--	--	Molecular Function: DNA binding (GO:0003677);; Cellular Component: nucleus (GO:0005634);; Biological Process: response to water deprivation (GO:0009414);; Biological Process: response to virus (GO:0009615);; Biological Process: response to salt stress (GO:0009651);; Biological Process: response to abscisic acid stimulus (GO:0009737);; Biological Process: positive regulation of transcription, DNA-…	--	Homeobox-leucine zipper protein ATHB-12 OS=Arabidopsis thaliana GN=ATHB-12 PE=2 SV=1	predicted protein [Populus trichocarpa]
gi_351627981_gb_JP480864.1	2.45e-05	1.49883	up	--	--	Molecular Function: binding (GO:0005488);; Biological Process: defense response (GO:0006952);; Biological Process: signal transduction (GO:0007165);; Biological Process: response to hormone stimulus (GO:0009725);; Biological Process: response to carbohydrate stimulus (GO:0009743);;	--	--	hypothetical protein PRUPE_ppa001077mg [Prunus persica]
gi_351620271_gb_JP474572.1	0.000143471	1.50316	up	[CHR]	--	Cellular Component: cytosol (GO:0005829);; Biological Process: oxidative photosynthetic carbon pathway (GO:0009854);; Molecular Function: hydroxypyruvate reductase activity (GO:0016618);; Molecular Function: glyoxylate reductase (NADP) activity (GO:0030267);; Molecular Function: glyoxylate reductase activity (GO:0047964);; Molecular Function: hydroxyphenylpyruvate reductase activity (GO:0047995);…	--	Hydroxyphenylpyruvate reductase OS=Solenostemon scutellarioides GN=HPPR PE=1 SV=2	glycerate dehydrogenase, putative [Ricinus communis]
gi_351619107_gb_JP473408.1	0.00980949	1.50384	up	--	--	--	--	Basic 7S globulin 2 OS=Glycine max PE=1 SV=1	hypothetical protein PRUPE_ppa022337mg [Prunus persica]
gi_351617143_gb_JP471444.1	3.32e-09	1.50792	up	--	--	Cellular Component: cytoplasm (GO:0005737);; Molecular Function: O-acyltransferase activity (GO:0008374);; Biological Process: anatomical structure morphogenesis (GO:0009653);; Biological Process: cellular component organization (GO:0016043);; Molecular Function: N-acyltransferase activity (GO:0016410);; Biological Process: primary metabolic process (GO:0044238);; Biological Process: cellular bio…	--	BAHD acyltransferase DCR OS=Arabidopsis thaliana GN=DCR PE=2 SV=1	hypothetical protein PRUPE_ppa005318mg [Prunus persica]
gi_351615212_gb_JP469513.1	1.58e-06	1.51675	up	--	--	--	--	--	hypothetical protein MTR_8g008840 [Medicago truncatula]
gi_351591685_gb_JP450131.1	0.000242303	1.51964	up	--	--	Cellular Component: plasma membrane (GO:0005886);; Biological Process: proteolysis (GO:0006508);; Biological Process: lipid transport (GO:0006869);; Molecular Function: peptidase activity (GO:0008233);; Molecular Function: lipid binding (GO:0008289);; Cellular Component: anchored to membrane (GO:0031225);; Cellular Component: anchored to plasma membrane (GO:0046658);; Biological Process: organic …	--	Non-specific lipid-transfer protein-like protein At5g64080 OS=Arabidopsis thaliana GN=At5g64080 PE=1 SV=1	Bifunctional inhibitor/lipid-transfer protein/seed storage 2S albumin superfamily protein [Theobroma cacao]
gi_351617608_gb_JP471909.1	4.6e-11	1.5225	up	--	--	Cellular Component: extracellular region (GO:0005576);; Biological Process: multicellular organismal development (GO:0007275);; Cellular Component: intracellular part (GO:0044424);; Biological Process: anatomical structure development (GO:0048856);;	--	Cold shock domain-containing protein 4 OS=Arabidopsis thaliana GN=CSP4 PE=1 SV=1	hypothetical protein MTR_2g012520 [Medicago truncatula]
gi_351617226_gb_JP471527.1	0.00201442	1.52416	up	--	--	Cellular Component: mitochondrion (GO:0005739);; Biological Process: ceramide metabolic process (GO:0006672);; Cellular Component: integral to membrane (GO:0016021);; Molecular Function: hydrolase activity, acting on carbon-nitrogen (but not peptide) bonds, in linear amides (GO:0016811);;	--	--	hypothetical protein PRUPE_ppa009985mg [Prunus persica]
gi_351598862_gb_JP453370.1	1.94e-06	1.52604	up	--	--	Cellular Component: integral to membrane (GO:0016021);; Biological Process: transmembrane transport (GO:0055085);;	--	Probable transporter MCH1 OS=Yarrowia lipolytica (strain CLIB 122 / E 150) GN=MCH1 PE=3 SV=1	PREDICTED: uncharacterized protein LOC101216552 [Cucumis sativus]
gi_351613011_gb_JP467312.1	6.17e-05	1.53506	up	--	--	--	--	--	PREDICTED: uncharacterized protein LOC101309290 [Fragaria vesca subsp. vesca]
gi_351618280_gb_JP472581.1	0.000140895	1.5413	up	--	--	Molecular Function: nutrient reservoir activity (GO:0045735);;	--	Legumin B OS=Gossypium hirsutum GN=LEGB PE=2 SV=1	7S globulin precursor [Ficus pumila var. awkeotsang]
gi_351627347_gb_JP480230.1	0.000388174	1.54183	up	--	--	Biological Process: nervous system development (GO:0007399);; Molecular Function: cytoskeletal protein binding (GO:0008092);; Biological Process: metabolic process (GO:0008152);; Cellular Component: membrane (GO:0016020);; Cellular Component: myosin complex (GO:0016459);; Biological Process: cell migration (GO:0016477);; Biological Process: cellular component assembly (GO:0022607);; Biological Pr…	--	WPP domain-interacting tail-anchored protein 2 OS=Arabidopsis thaliana GN=WIT2 PE=1 SV=1	hypothetical protein PRUPE_ppa002890mg [Prunus persica]
gi_351612765_gb_JP467066.1	8.69e-07	1.54771	up	--	--	Molecular Function: structural constituent of ribosome (GO:0003735);; Cellular Component: ribosome (GO:0005840);; Biological Process: translation (GO:0006412);;	--	Uncharacterized protein At5g19025 OS=Arabidopsis thaliana GN=At5g19025 PE=2 SV=3	hypothetical protein PRUPE_ppa010896mg [Prunus persica]
gi_351614003_gb_JP468304.1	9.24e-10	1.55305	up	--	--	Biological Process: polysaccharide biosynthetic process (GO:0000271);; Cellular Component: extracellular region (GO:0005576);; Cellular Component: plasma membrane (GO:0005886);; Biological Process: proteolysis (GO:0006508);; Biological Process: defense response (GO:0006952);; Biological Process: pattern specification process (GO:0007389);; Molecular Function: peptidase activity (GO:0008233);; Bio…	--	Defensin-like protein 2 OS=Arabidopsis thaliana GN=PDF2.2 PE=2 SV=1	putative gamma-thionin [Castanea sativa]
gi_351624179_gb_JP478480.1	0.000617923	1.55496	up	--	--	Cellular Component: extracellular region (GO:0005576);; Cellular Component: Golgi apparatus (GO:0005794);; Cellular Component: cytosol (GO:0005829);; Cellular Component: plant-type cell wall (GO:0009505);; Cellular Component: plasmodesma (GO:0009506);; Biological Process: unidimensional cell growth (GO:0009826);; Biological Process: plant-type cell wall loosening (GO:0009828);; Cellular Component…	--	Expansin-like A1 OS=Arabidopsis thaliana GN=EXLA1 PE=2 SV=1	Expansin-like protein isoform 1 [Theobroma cacao]
gi_351621883_gb_JP476184.1	0.000344168	1.55829	up	--	--	Biological Process: multicellular organismal development (GO:0007275);; Biological Process: anatomical structure development (GO:0048856);;	--	--	unnamed protein product [Vitis vinifera]
gi_351600742_gb_JP455204.1	0.0012234	1.56975	up	--	--	--	--	--	PREDICTED: uncharacterized protein LOC101306469 [Fragaria vesca subsp. vesca]
gi_351629105_gb_JP481988.1	0.000904388	1.57718	up	--	--	Cellular Component: cytoplasm (GO:0005737);; Biological Process: response to wounding (GO:0009611);; Biological Process: systemic acquired resistance (GO:0009627);; Biological Process: phenylpropanoid biosynthetic process (GO:0009699);; Biological Process: coumarin biosynthetic process (GO:0009805);; Biological Process: positive regulation of flavonoid biosynthetic process (GO:0009963);; Molecula…	--	3&apos;-N-debenzoyl-2&apos;-deoxytaxol N-benzoyltransferase OS=Taxus canadensis GN=TAX10 PE=1 SV=1	hypothetical protein PRUPE_ppa005640mg [Prunus persica]
gi_351606914_gb_JP461239.1	0.00695715	1.58125	up	[GEPR]	--	Molecular Function: sugar:hydrogen symporter activity (GO:0005351);; Molecular Function: myo-inositol:hydrogen symporter activity (GO:0005366);; Cellular Component: plasma membrane (GO:0005886);; Biological Process: purine nucleobase transport (GO:0006863);; Cellular Component: plant-type vacuole membrane (GO:0009705);; Molecular Function: galactose:hydrogen symporter activity (GO:0015517);; Biol…	K08150|0.0|vvi:100246301|hypothetical protein LOC100246301	Probable inositol transporter 2 OS=Arabidopsis thaliana GN=INT2 PE=1 SV=1	hypothetical protein PRUPE_ppa023920mg [Prunus persica]
gi_351610521_gb_JP464822.1	0.00326298	1.58144	up	--	--	Molecular Function: transcription regulatory region sequence-specific DNA binding (GO:0000976);; Molecular Function: sequence-specific DNA binding transcription factor activity (GO:0003700);; Cellular Component: nucleus (GO:0005634);; Biological Process: response to desiccation (GO:0009269);; Biological Process: response to cold (GO:0009409);; Biological Process: response to water deprivation (GO…	--	Homeobox-leucine zipper protein ATHB-7 OS=Arabidopsis thaliana GN=ATHB-7 PE=2 SV=2	homeobox leucine zipper [Rosa rugosa]
gi_351600433_gb_JP454901.1	0.000113482	1.59189	up	--	--	Molecular Function: binding (GO:0005488);;	--	Putative disease resistance protein RGA4 OS=Solanum bulbocastanum GN=RGA4 PE=2 SV=1	leucine-rich repeat containing protein, putative [Ricinus communis]
gi_351628557_gb_JP481440.1	6.1e-05	1.59395	up	--	--	Molecular Function: protein binding (GO:0005515);; Cellular Component: cytosol (GO:0005829);; Biological Process: response to stress (GO:0006950);; Biological Process: pollen development (GO:0009555);; Biological Process: lignin biosynthetic process (GO:0009809);; Biological Process: positive regulation of flavonoid biosynthetic process (GO:0009963);; Biological Process: cellular process (GO:0009…	K13065|1e-117|vvi:100265530|hypothetical protein LOC100265530	Shikimate O-hydroxycinnamoyltransferase OS=Arabidopsis thaliana GN=HST PE=2 SV=1	hypothetical protein PRUPE_ppa005955mg [Prunus persica]
gi_351609883_gb_JP464184.1	2.6e-10	1.63688	up	--	--	Molecular Function: protein binding (GO:0005515);; Cellular Component: nucleus (GO:0005634);; Biological Process: response to stress (GO:0006950);; Biological Process: regulation of gibberellic acid mediated signaling pathway (GO:0009937);; Biological Process: SCF complex assembly (GO:0010265);; Cellular Component: SCF ubiquitin ligase complex (GO:0019005);; Biological Process: SCF-dependent prot…	--	F-box protein At2g27310 OS=Arabidopsis thaliana GN=At2g27310 PE=2 SV=1	hypothetical protein PRUPE_ppa007311mg [Prunus persica]
gi_351611228_gb_JP465529.1	0.000563323	1.65573	up	--	--	Cellular Component: vacuole (GO:0005773);; Cellular Component: chloroplast (GO:0009507);; Biological Process: glucosinolate biosynthetic process (GO:0019761);; Cellular Component: aleurone grain membrane (GO:0032578);; Biological Process: primary metabolic process (GO:0044238);; Cellular Component: anchored to plasma membrane (GO:0046658);; Molecular Function: metal ion binding (GO:0046872);; Cel…	--	Early nodulin-like protein 2 OS=Arabidopsis thaliana GN=At4g27520 PE=1 SV=1	PREDICTED: early nodulin-like protein 2-like [Fragaria vesca subsp. vesca]
gi_351600143_gb_JP454619.1	0.00355654	1.66833	up	--	--	Molecular Function: guanosine-diphosphatase activity (GO:0004382);; Molecular Function: calmodulin binding (GO:0005516);; Cellular Component: extracellular space (GO:0005615);; Cellular Component: mitochondrion (GO:0005739);; Cellular Component: endosome (GO:0005768);; Cellular Component: Golgi apparatus (GO:0005794);; Cellular Component: trans-Golgi network (GO:0005802);; Cellular Component: pla…	K14641|7e-28|vvi:100267968|hypothetical protein LOC100267968	Nucleoside-triphosphatase OS=Pisum sativum PE=2 SV=1	PREDICTED: apyrase 2-like [Fragaria vesca subsp. vesca]
gi_351625609_gb_JP479910.1	5.12e-12	1.67845	up	--	--	--	--	--	PREDICTED: uncharacterized protein LOC101298363 [Fragaria vesca subsp. vesca]
gi_351602165_gb_JP456596.1	5.78e-12	1.73456	up	--	--	Biological Process: defense response (GO:0006952);; Molecular Function: hydrolase activity (GO:0016787);; Biological Process: cellular metabolic process (GO:0044237);; Biological Process: regulation of cellular process (GO:0050794);; Biological Process: response to other organism (GO:0051707);; Biological Process: cellular response to stimulus (GO:0051716);; Biological Process: organic substance …	--	Basic 7S globulin OS=Glycine max GN=BG PE=1 SV=2	xyloglucanase inhibitor 3 [Humulus lupulus]
gi_351624526_gb_JP478827.1	2.41e-14	1.73587	up	[IQ]	--	Cellular Component: mitochondrion (GO:0005739);; Cellular Component: cytosol (GO:0005829);; Biological Process: lipid metabolic process (GO:0006629);; Molecular Function: o-succinylbenzoate-CoA ligase activity (GO:0008756);; Cellular Component: plasmodesma (GO:0009506);; Cellular Component: chloroplast stroma (GO:0009570);; Biological Process: positive regulation of seed germination (GO:0010030);…	--	4-coumarate--CoA ligase-like 10 OS=Arabidopsis thaliana GN=4CLL10 PE=2 SV=1	acyl-activating enzyme 8 [Cannabis sativa]
gi_351597227_gb_JP451777.1	0.000126985	1.73898	up	--	--	Molecular Function: 1-phosphatidylinositol 4-kinase activity (GO:0004430);; Molecular Function: phosphatidylinositol-4,5-bisphosphate binding (GO:0005546);; Cellular Component: nucleus (GO:0005634);; Cellular Component: Golgi-associated vesicle (GO:0005798);; Cellular Component: cytosol (GO:0005829);; Cellular Component: plasma membrane (GO:0005886);; Biological Process: protein phosphorylation (…	--	Phosphatidylinositol 4-kinase alpha 2 OS=Arabidopsis thaliana GN=PI4KALPHA2 PE=1 SV=1	hypothetical protein ARALYDRAFT_920527 [Arabidopsis lyrata subsp. lyrata]
gi_351605787_gb_JP460129.1	0.00220156	1.75465	up	--	--	Molecular Function: protein binding (GO:0005515);; Cellular Component: nucleus (GO:0005634);; Biological Process: response to salt stress (GO:0009651);; Biological Process: negative regulation of abscisic acid mediated signaling pathway (GO:0009788);; Biological Process: jasmonic acid mediated signaling pathway (GO:0009867);; Biological Process: regulation of starch biosynthetic process (GO:00105…	--	Ninja-family protein AFP2 OS=Arabidopsis thaliana GN=AFP2 PE=1 SV=1	hypothetical protein PRUPE_ppa007375mg [Prunus persica]
gi_351597144_gb_JP451694.1	0.000574046	1.75577	up	--	--	Biological Process: MAPK cascade (GO:0000165);; Biological Process: response to hypoxia (GO:0001666);; Molecular Function: sequence-specific DNA binding transcription factor activity (GO:0003700);; Cellular Component: nucleus (GO:0005634);; Biological Process: trehalose biosynthetic process (GO:0005992);; Biological Process: proline biosynthetic process (GO:0006561);; Biological Process: protein …	--	NAC transcription factor 29 OS=Arabidopsis thaliana GN=NAC029 PE=2 SV=1	hypothetical protein PRUPE_ppa009455mg [Prunus persica]
gi_351629183_gb_JP482066.1	0.00403319	1.77015	up	--	--	Molecular Function: sequence-specific DNA binding transcription factor activity (GO:0003700);; Molecular Function: protein binding (GO:0005515);; Cellular Component: nucleus (GO:0005634);; Biological Process: regulation of transcription, DNA-dependent (GO:0006355);; Biological Process: defense response (GO:0006952);; Biological Process: response to osmotic stress (GO:0006970);; Biological Process…	--	Ethylene-responsive transcription factor CRF4 OS=Arabidopsis thaliana GN=CRF4 PE=1 SV=2	Ethylene-responsive transcription factor, putative [Theobroma cacao]
gi_351600024_gb_JP454501.1	1.49e-08	1.80634	up	[RTKL]	--	Biological Process: MAPK cascade (GO:0000165);; Molecular Function: calmodulin-dependent protein kinase activity (GO:0004683);; Molecular Function: calcium ion binding (GO:0005509);; Molecular Function: protein binding (GO:0005515);; Molecular Function: ATP binding (GO:0005524);; Cellular Component: nucleus (GO:0005634);; Cellular Component: vacuole (GO:0005773);; Cellular Component: peroxisome (…	K13412|0.0|rcu:RCOM_0422070|calcium-dependent protein kinase, putative (EC:2.7.11.17)	Calcium-dependent protein kinase 1 OS=Arabidopsis thaliana GN=CPK1 PE=1 SV=1	hypothetical protein PRUPE_ppa002734mg [Prunus persica]
gi_351591157_gb_JP449613.1	2.54e-13	1.81065	up	--	--	Biological Process: defense response (GO:0006952);; Biological Process: response to organic substance (GO:0010033);; Molecular Function: hydrolase activity (GO:0016787);; Biological Process: cellular metabolic process (GO:0044237);; Biological Process: regulation of cellular process (GO:0050794);; Biological Process: response to other organism (GO:0051707);; Biological Process: cellular response …	--	Basic 7S globulin OS=Glycine max GN=BG PE=1 SV=2	xyloglucanase inhibitor 3 [Humulus lupulus]
gi_351623544_gb_JP477845.1	3.66e-07	1.81077	up	--	--	Biological Process: cellular process (GO:0009987);; Molecular Function: kinase activity (GO:0016301);; Biological Process: phosphorylation (GO:0016310);; Molecular Function: phosphotransferase activity, alcohol group as acceptor (GO:0016773);; Biological Process: primary metabolic process (GO:0044238);; Cellular Component: cell part (GO:0044464);; Biological Process: organic substance metabolic p…	K00888|0.0|rcu:RCOM_0937410|phosphatidylinositol 4-kinase, putative (EC:2.7.1.67)	Phosphatidylinositol 4-kinase alpha OS=Arabidopsis thaliana GN=PI4KALPHA1 PE=1 SV=2	hypothetical protein PRUPE_ppa000062mg [Prunus persica]
gi_351597997_gb_JP452531.1	9.18e-10	1.83767	up	--	--	Cellular Component: nucleus (GO:0005634);; Cellular Component: endoplasmic reticulum (GO:0005783);; Biological Process: nitrogen compound metabolic process (GO:0006807);; Molecular Function: O-acyltransferase activity (GO:0008374);; Biological Process: phenylpropanoid biosynthetic process (GO:0009699);; Biological Process: flavonoid biosynthetic process (GO:0009813);; Biological Process: wax bios…	--	Rosmarinate synthase OS=Solenostemon scutellarioides GN=CBHCT1 PE=1 SV=1	predicted protein [Populus trichocarpa]
gi_351617783_gb_JP472084.1	1.06e-13	1.83875	up	--	--	--	--	--	hypothetical protein PRUPE_ppa009489mg [Prunus persica]
gi_351622575_gb_JP476876.1	0.00210033	1.84326	up	[FJ]	--	Biological Process: tRNA wobble adenosine to inosine editing (GO:0002100);; Cellular Component: cytosol (GO:0005829);; Cellular Component: plasma membrane (GO:0005886);; Biological Process: metabolic process (GO:0008152);; Molecular Function: tRNA-specific adenosine deaminase activity (GO:0008251);; Molecular Function: zinc ion binding (GO:0008270);; Cellular Component: chloroplast (GO:0009507);;…	--	Guanine deaminase OS=Bacillus subtilis (strain 168) GN=guaD PE=1 SV=1	tRNA-specific adenosine deaminase [Medicago truncatula]
gi_351614393_gb_JP468694.1	1.67e-05	1.8581	up	[TZDR]	--	Molecular Function: calcium ion binding (GO:0005509);; Cellular Component: nucleus (GO:0005634);; Cellular Component: mitochondrion (GO:0005739);; Cellular Component: plasma membrane (GO:0005886);; Biological Process: response to cold (GO:0009409);; Biological Process: double fertilization forming a zygote and endosperm (GO:0009567);; Biological Process: response to wounding (GO:0009611);; Biolog…	K13448|1e-62|vvi:100247858|hypothetical protein LOC100247858	Calcium-binding protein CML37 OS=Arabidopsis thaliana GN=CML37 PE=2 SV=1	PREDICTED: calcium-binding protein CML37 [Vitis vinifera]
gi_351622422_gb_JP476723.1	0.00537949	1.87091	up	--	--	--	--	--	predicted protein [Populus trichocarpa]
gi_351610418_gb_JP464719.1	0.00726718	1.8744	up	--	--	Molecular Function: catalytic activity (GO:0003824);;	--	Transposon TX1 uncharacterized 149 kDa protein OS=Xenopus laevis PE=4 SV=1	putative AP endonuclease/reverse transcriptase [Brassica napus]
gi_351615241_gb_JP469542.1	5.75e-12	1.88169	up	--	--	Molecular Function: RNA binding (GO:0003723);; Molecular Function: RNA-directed DNA polymerase activity (GO:0003964);; Cellular Component: mitochondrion (GO:0005739);; Biological Process: RNA-dependent DNA replication (GO:0006278);;	--	--	hypothetical protein PRUPE_ppa020180mg [Prunus persica]
gi_351625248_gb_JP479549.1	8.52e-05	1.88905	up	--	--	--	--	Seipin OS=Drosophila melanogaster GN=Seipin PE=2 SV=1	PREDICTED: uncharacterized protein LOC100263320 [Vitis vinifera]
gi_351611570_gb_JP465871.1	0.000626576	1.88995	up	--	--	--	--	Enhancer of rudimentary homolog OS=Arabidopsis thaliana GN=At5g10810 PE=2 SV=1	predicted protein [Populus trichocarpa]
gi_351591083_gb_JP449539.1	0.00119708	1.9183	up	--	--	--	--	--	Uncharacterized protein TCM_017094 [Theobroma cacao]
gi_351597133_gb_JP451683.1	0.000429746	1.9251	up	--	--	Molecular Function: diacylglycerol O-acyltransferase activity (GO:0004144);; Cellular Component: endoplasmic reticulum (GO:0005783);; Biological Process: wax biosynthetic process (GO:0010025);; Molecular Function: long-chain-alcohol O-fatty-acyltransferase activity (GO:0047196);; Biological Process: ovule development (GO:0048481);;	--	O-acyltransferase WSD1 OS=Arabidopsis thaliana GN=WSD1 PE=2 SV=1	hypothetical protein PRUPE_ppa018127mg [Prunus persica]
gi_351629441_gb_JP482324.1	4.9e-11	1.92983	up	--	--	Cellular Component: cell part (GO:0044464);;	--	Proline-rich receptor-like protein kinase PERK2 OS=Arabidopsis thaliana GN=PERK2 PE=2 SV=3	PREDICTED: uncharacterized protein LOC101298442 isoform 1 [Fragaria vesca subsp. vesca]
gi_351607655_gb_JP461975.1	8.41e-09	1.96687	up	--	--	Cellular Component: extracellular region (GO:0005576);; Cellular Component: plasmodesma (GO:0009506);; Molecular Function: nutrient reservoir activity (GO:0045735);;	--	Beta-conglycinin, alpha&apos; chain OS=Glycine max GN=CG-1 PE=2 SV=1	7S globulin precursor [Ficus pumila var. awkeotsang]
gi_351623329_gb_JP477630.1	7.2e-07	2.00256	up	--	--	Biological Process: amino acid transmembrane transport (GO:0003333);; Molecular Function: amine transmembrane transporter activity (GO:0005275);; Cellular Component: plasma membrane (GO:0005886);; Biological Process: N-terminal protein myristoylation (GO:0006499);; Biological Process: protein targeting to membrane (GO:0006612);; Biological Process: nucleotide transport (GO:0006862);; Biological P…	--	Lysine histidine transporter-like 6 OS=Arabidopsis thaliana GN=At1g25530 PE=2 SV=1	lysine/histidine transporter [Populus trichocarpa]
gi_351619283_gb_JP473584.1	1.32e-08	2.01051	up	--	--	Cellular Component: nucleus (GO:0005634);; Biological Process: galactose metabolic process (GO:0006012);; Biological Process: response to heat (GO:0009408);; Biological Process: response to cold (GO:0009409);; Biological Process: response to water deprivation (GO:0009414);; Biological Process: response to high light intensity (GO:0009644);; Biological Process: response to salt stress (GO:0009651)…	--	Galactinol synthase 1 OS=Arabidopsis thaliana GN=GOLS1 PE=1 SV=1	PREDICTED: glycogenin-2-like [Glycine max]
gi_351605811_gb_JP460152.1	1.81e-19	2.02009	up	[RTKL]	--	Molecular Function: protein serine/threonine kinase activity (GO:0004674);; Molecular Function: ATP binding (GO:0005524);; Cellular Component: nucleus (GO:0005634);; Cellular Component: vacuole (GO:0005773);; Cellular Component: peroxisome (GO:0005777);; Cellular Component: endoplasmic reticulum membrane (GO:0005789);; Cellular Component: cytosol (GO:0005829);; Cellular Component: plasma membrane…	--	Phosphoenolpyruvate carboxylase kinase 1 OS=Arabidopsis thaliana GN=PPCK1 PE=1 SV=1	hypothetical protein PRUPE_ppa009865mg [Prunus persica]
gi_351607554_gb_JP461874.1	2.94e-16	2.03956	up	--	--	Cellular Component: nucleus (GO:0005634);; Biological Process: protein folding (GO:0006457);; Biological Process: response to heat (GO:0009408);; Biological Process: response to water deprivation (GO:0009414);; Biological Process: response to high light intensity (GO:0009644);; Biological Process: response to salt stress (GO:0009651);; Biological Process: abscisic acid mediated signaling pathway …	--	EID1-like F-box protein 3 OS=Arabidopsis thaliana GN=EDL3 PE=2 SV=1	PREDICTED: EID1-like F-box protein 3-like [Vitis vinifera]
gi_351600264_gb_JP454735.1	1.84e-15	2.05121	up	--	--	Cellular Component: intracellular membrane-bounded organelle (GO:0043231);;	--	--	PREDICTED: uncharacterized protein LOC101303288 [Fragaria vesca subsp. vesca]
gi_351613908_gb_JP468209.1	0.00599185	2.05278	up	[LR]	--	Biological Process: MAPK cascade (GO:0000165);; Molecular Function: NAD+ diphosphatase activity (GO:0000210);; Biological Process: respiratory burst involved in defense response (GO:0002679);; Molecular Function: protein binding (GO:0005515);; Cellular Component: nucleus (GO:0005634);; Cellular Component: cytosol (GO:0005829);; Cellular Component: plasma membrane (GO:0005886);; Biological Process…	--	Nudix hydrolase 2 OS=Arabidopsis thaliana GN=NUDT2 PE=1 SV=1	hypothetical protein PRUPE_ppa007741mg [Prunus persica]
gi_351610534_gb_JP464835.1	0.00248864	2.06041	up	--	--	--	--	--	PREDICTED: putative ribonuclease H protein At1g65750-like [Fragaria vesca subsp. vesca]
gi_351624275_gb_JP478576.1	8.69e-07	2.0837	up	--	--	Molecular Function: intracellular cAMP activated cation channel activity (GO:0005222);; Molecular Function: inward rectifier potassium channel activity (GO:0005242);; Molecular Function: cation channel activity (GO:0005261);; Molecular Function: calcium channel activity (GO:0005262);; Molecular Function: calmodulin binding (GO:0005516);; Cellular Component: plasma membrane (GO:0005886);; Biologic…	--	Cyclic nucleotide-gated ion channel 4 OS=Arabidopsis thaliana GN=CNGC4 PE=2 SV=2	Cyclic nucleotide-gated ion channel, putative [Ricinus communis]
gi_351624288_gb_JP478589.1	1.32e-06	2.09512	up	--	--	Biological Process: G2/M transition of mitotic cell cycle (GO:0000086);; Biological Process: establishment of mitotic spindle orientation (GO:0000132);; Biological Process: microtubule cytoskeleton organization (GO:0000226);; Cellular Component: kinetochore (GO:0000776);; Biological Process: morphogenesis of an epithelium (GO:0002009);; Biological Process: nematode larval development (GO:0002119)…	--	Dynein light chain LC6, flagellar outer arm OS=Heliocidaris crassispina PE=3 SV=1	hypothetical protein PRUPE_ppa012625mg [Prunus persica]
gi_351599899_gb_JP454380.1	0.00295037	2.10072	up	[RTKL]	--	Molecular Function: protein kinase activity (GO:0004672);; Biological Process: glucose catabolic process (GO:0006007);; Biological Process: response to stress (GO:0006950);; Biological Process: response to osmotic stress (GO:0006970);; Biological Process: organelle organization (GO:0006996);; Biological Process: meiosis (GO:0007126);; Cellular Component: plasmodesma (GO:0009506);; Biological Proc…	--	Receptor-like protein kinase FERONIA OS=Arabidopsis thaliana GN=FER PE=1 SV=1	Malectin/receptor protein kinase family protein, putative [Theobroma cacao]
gi_351610148_gb_JP464449.1	0.00497593	2.11695	up	--	--	Cellular Component: cytoplasm (GO:0005737);; Cellular Component: cytosol (GO:0005829);; Biological Process: protein folding (GO:0006457);; Biological Process: hyperosmotic response (GO:0006972);; Biological Process: response to heat (GO:0009408);; Biological Process: response to high light intensity (GO:0009644);; Biological Process: heat acclimation (GO:0010286);; Biological Process: response to…	--	17.4 kDa class III heat shock protein OS=Arabidopsis thaliana GN=HSP17.4B PE=2 SV=1	hypothetical protein PRUPE_ppa012616mg [Prunus persica]
gi_351625448_gb_JP479749.1	2.53e-06	2.12474	up	--	--	--	--	--	PREDICTED: uncharacterized protein LOC101296321 [Fragaria vesca subsp. vesca]
gi_351598087_gb_JP452620.1	3.28e-07	2.12737	up	--	--	Biological Process: very long-chain fatty acid metabolic process (GO:0000038);; Biological Process: polysaccharide biosynthetic process (GO:0000271);; Molecular Function: 1-acylglycerol-3-phosphate O-acyltransferase activity (GO:0003841);; Cellular Component: mitochondrion (GO:0005739);; Cellular Component: endoplasmic reticulum (GO:0005783);; Biological Process: phosphatidylglycerol biosynthetic…	K13508|0.0|pop:POPTR_559475|hypothetical protein	Glycerol-3-phosphate acyltransferase 1 OS=Arabidopsis thaliana GN=GPAT1 PE=1 SV=1	hypothetical protein PRUPE_ppa022841mg [Prunus persica]
gi_351616177_gb_JP470478.1	0.000167717	2.13727	up	--	--	--	--	--	PREDICTED: uncharacterized protein LOC101309055 [Fragaria vesca subsp. vesca]
gi_351620729_gb_JP475030.1	6.55e-16	2.13804	up	--	--	--	--	Uncharacterized histidine-rich protein DDB_G0274557 OS=Dictyostelium discoideum GN=DDB_G0274557 PE=4 SV=1	PREDICTED: uncharacterized protein LOC101256790 [Solanum lycopersicum]
gi_351621943_gb_JP476244.1	3.8e-12	2.15707	up	--	--	Cellular Component: extracellular region (GO:0005576);; Biological Process: lipid transport (GO:0006869);; Biological Process: defense response (GO:0006952);; Molecular Function: lipid binding (GO:0008289);; Biological Process: response to biotic stimulus (GO:0009607);; Biological Process: multi-organism process (GO:0051704);;	--	Non-specific lipid-transfer protein 1 OS=Morus nigra PE=1 SV=1	PREDICTED: non-specific lipid-transfer protein-like isoform 1 [Fragaria vesca subsp. vesca]
gi_351606239_gb_JP460568.1	0.000378405	2.16458	up	--	--	Biological Process: reproductive process (GO:0022414);; Biological Process: multicellular organismal process (GO:0032501);; Cellular Component: intracellular membrane-bounded organelle (GO:0043231);; Cellular Component: protein complex (GO:0043234);; Biological Process: negative regulation of cellular process (GO:0048523);; Biological Process: anatomical structure development (GO:0048856);; Biolo…	--	F-box/kelch-repeat protein At2g44130 OS=Arabidopsis thaliana GN=At2g44130 PE=2 SV=2	F-box family protein [Theobroma cacao]
gi_351615767_gb_JP470068.1	1.95e-08	2.18477	up	[KAD]	--	Molecular Function: DNA binding (GO:0003677);; Molecular Function: chromatin binding (GO:0003682);; Molecular Function: sequence-specific DNA binding transcription factor activity (GO:0003700);; Molecular Function: binding (GO:0005488);; Cellular Component: nucleus (GO:0005634);; Biological Process: response to water deprivation (GO:0009414);; Biological Process: response to wounding (GO:0009611)…	K09422|1e-126|pop:POPTR_648134|MYB018	Protein ODORANT1 OS=Petunia hybrida GN=ODO1 PE=2 SV=1	Myb domain protein 20 [Theobroma cacao]
gi_351618626_gb_JP472927.1	1.58e-20	2.21942	up	--	--	Molecular Function: iron ion binding (GO:0005506);; Cellular Component: cytoplasm (GO:0005737);; Biological Process: syncytium formation (GO:0006949);; Molecular Function: ferric iron binding (GO:0008199);; Biological Process: cellular water homeostasis (GO:0009992);; Biological Process: cellular membrane organization (GO:0016044);; Cellular Component: inclusion body (GO:0016234);; Biological Pro…	K00469|1e-167|vvi:100233007|myo-inositol oxidase	Probable inositol oxygenase OS=Oryza sativa subsp. japonica GN=Os06g0561000 PE=2 SV=1	PREDICTED: inositol oxygenase 1-like [Fragaria vesca subsp. vesca]
gi_351622987_gb_JP477288.1	0.00283056	2.22301	up	--	--	Biological Process: G2/M transition of mitotic cell cycle (GO:0000086);; Biological Process: establishment of mitotic spindle orientation (GO:0000132);; Cellular Component: kinetochore (GO:0000776);; Biological Process: morphogenesis of an epithelium (GO:0002009);; Biological Process: nematode larval development (GO:0002119);; Molecular Function: microtubule motor activity (GO:0003777);; Molecula…	--	Dynein light chain LC6, flagellar outer arm OS=Heliocidaris crassispina PE=3 SV=1	PREDICTED: dynein light chain LC6, flagellar outer arm [Vitis vinifera]
gi_351605735_gb_JP460078.1	6.88e-09	2.22445	up	--	--	Molecular Function: O-acyltransferase activity (GO:0008374);; Biological Process: phenylpropanoid biosynthetic process (GO:0009699);; Biological Process: flavonoid biosynthetic process (GO:0009813);; Molecular Function: N-acyltransferase activity (GO:0016410);; Molecular Function: transferase activity (GO:0016740);; Biological Process: primary metabolic process (GO:0044238);; Molecular Function: …	--	Vinorine synthase OS=Rauvolfia serpentina GN=ACT PE=1 SV=2	PREDICTED: vinorine synthase-like [Fragaria vesca subsp. vesca]
gi_351608975_gb_JP463276.1	0.00154564	2.22816	up	--	--	--	--	--	hypothetical protein PRUPE_ppa017601mg [Prunus persica]
gi_351597378_gb_JP451925.1	0.00569091	2.25721	up	--	--	Biological Process: mitotic cell cycle (GO:0000278);; Molecular Function: DNA binding (GO:0003677);; Molecular Function: sequence-specific DNA binding transcription factor activity (GO:0003700);; Cellular Component: nucleus (GO:0005634);; Biological Process: regulation of transcription, DNA-dependent (GO:0006355);; Biological Process: RNA processing (GO:0006396);; Biological Process: sulfur compo…	--	Transcription factor bHLH87 OS=Arabidopsis thaliana GN=BHLH87 PE=2 SV=1	Basic helix-loop-helix DNA-binding superfamily protein, putative isoform 2 [Theobroma cacao]
gi_351614160_gb_JP468461.1	4.63e-24	2.26129	up	--	--	--	--	UPF0506 protein SJCHGC03144 OS=Schistosoma japonicum GN=SJCHGC03144 PE=2 SV=1	--
gi_351616616_gb_JP470917.1	2.69e-07	2.26442	up	--	--	Molecular Function: acetyl-CoA C-acetyltransferase activity (GO:0003985);; Cellular Component: cytosol (GO:0005829);; Biological Process: multicellular organismal development (GO:0007275);; Biological Process: lipid biosynthetic process (GO:0008610);; Biological Process: phenylpropanoid metabolic process (GO:0009698);; Biological Process: anthocyanin-containing compound biosynthetic process (GO:0…	--	Phenolic glucoside malonyltransferase 1 OS=Arabidopsis thaliana GN=PMAT1 PE=1 SV=1	HXXXD-type acyl-transferase family protein, putative [Theobroma cacao]
gi_351622319_gb_JP476620.1	0.000110096	2.27741	up	--	--	Biological Process: transport (GO:0006810);;	--	Non-specific lipid-transfer protein OS=Gossypium hirsutum PE=3 SV=1	PREDICTED: non-specific lipid-transfer protein 1-like [Fragaria vesca subsp. vesca]
gi_351609227_gb_JP463528.1	0.0049936	2.30606	up	--	--	Molecular Function: hydroxyacylglutathione hydrolase activity (GO:0004416);; Cellular Component: cytosol (GO:0005829);; Biological Process: protein targeting to vacuole (GO:0006623);; Biological Process: glutathione biosynthetic process (GO:0006750);; Molecular Function: zinc ion binding (GO:0008270);; Biological Process: methylglyoxal catabolic process to D-lactate (GO:0019243);; Biological Proc…	K01069|4e-19|vvi:100243205|hypothetical protein LOC100243205	Hydroxyacylglutathione hydrolase cytoplasmic OS=Arabidopsis thaliana GN=GLX2-2 PE=1 SV=2	PREDICTED: hydroxyacylglutathione hydrolase cytoplasmic-like isoform 2 [Fragaria vesca subsp. vesca]
gi_351624348_gb_JP478649.1	0.0035645	2.30793	up	--	--	--	--	--	hypothetical protein PRUPE_ppa016754mg [Prunus persica]
gi_351597716_gb_JP452257.1	0.000170627	2.33659	up	--	--	Molecular Function: protein binding (GO:0005515);; Cellular Component: nucleus (GO:0005634);; Biological Process: response to virus (GO:0009615);; Biological Process: glutamine secretion (GO:0010585);; Cellular Component: integral to membrane (GO:0016021);; Biological Process: virus-host interaction (GO:0019048);; Biological Process: regulation of amino acid export (GO:0080143);;	--	Protein GLUTAMINE DUMPER 1 OS=Arabidopsis thaliana GN=GDU1 PE=1 SV=1	PREDICTED: protein GLUTAMINE DUMPER 6-like [Cicer arietinum]
gi_351606378_gb_JP460706.1	0.00454192	2.37694	up	--	--	--	--	--	PREDICTED: uncharacterized protein LOC100247764 [Vitis vinifera]
gi_351613467_gb_JP467768.1	3.68e-05	2.3994	up	--	--	--	--	--	PREDICTED: uncharacterized protein LOC100259535 [Vitis vinifera]
gi_351606384_gb_JP460712.1	0.000166377	2.40967	up	--	--	Cellular Component: nucleus (GO:0005634);; Cellular Component: cytoplasm (GO:0005737);; Biological Process: galactose metabolic process (GO:0006012);; Biological Process: response to heat (GO:0009408);; Biological Process: response to cold (GO:0009409);; Biological Process: response to high light intensity (GO:0009644);; Biological Process: response to salt stress (GO:0009651);; Biological Proces…	--	Galactinol synthase 4 OS=Arabidopsis thaliana GN=GOLS4 PE=2 SV=1	PREDICTED: glycogenin-2-like [Glycine max]
gi_351624851_gb_JP479152.1	0.00970878	2.46959	up	--	--	Biological Process: polysaccharide biosynthetic process (GO:0000271);; Molecular Function: sequence-specific DNA binding transcription factor activity (GO:0003700);; Molecular Function: protein serine/threonine kinase activity (GO:0004674);; Molecular Function: ATP binding (GO:0005524);; Cellular Component: nucleus (GO:0005634);; Cellular Component: cytosol (GO:0005829);; Cellular Component: plas…	--	Beta-amylase 1, chloroplastic OS=Arabidopsis thaliana GN=BAM1 PE=1 SV=1	Beta-amylase, putative [Ricinus communis]
gi_351612824_gb_JP467125.1	0.00307872	2.50083	up	--	--	Biological Process: metal ion transport (GO:0030001);; Molecular Function: metal ion binding (GO:0046872);;	--	--	PREDICTED: uncharacterized protein LOC100800008 [Glycine max]
gi_351604139_gb_JP458493.1	1.36e-06	2.50156	up	--	--	Molecular Function: O-acyltransferase activity (GO:0008374);; Biological Process: flavonoid biosynthetic process (GO:0009813);; Molecular Function: N-acyltransferase activity (GO:0016410);; Molecular Function: transferase activity (GO:0016740);; Biological Process: cellular biosynthetic process (GO:0044249);;	--	Deacetylvindoline O-acetyltransferase OS=Catharanthus roseus GN=DAT PE=1 SV=1	PREDICTED: vinorine synthase-like [Fragaria vesca subsp. vesca]
gi_351602403_gb_JP456827.1	0.00469735	2.5598	up	--	--	Cellular Component: protein phosphatase type 2A complex (GO:0000159);; Molecular Function: receptor binding (GO:0005102);; Molecular Function: ATP binding (GO:0005524);; Cellular Component: nucleolus (GO:0005730);; Cellular Component: cytoplasm (GO:0005737);; Biological Process: ATP catabolic process (GO:0006200);; Molecular Function: protein tyrosine phosphatase activator activity (GO:0008160);;…	--	Serine/threonine-protein phosphatase 2A activator OS=Bos taurus GN=PPP2R4 PE=2 SV=1	PREDICTED: serine/threonine-protein phosphatase 2A activator-like [Fragaria vesca subsp. vesca]
gi_351606158_gb_JP460491.1	5.77e-06	2.57594	up	[KAD]	--	Biological Process: negative regulation of transcription from RNA polymerase II promoter (GO:0000122);; Molecular Function: sequence-specific DNA binding transcription factor activity (GO:0003700);; Molecular Function: protein binding (GO:0005515);; Biological Process: chromatin remodeling (GO:0006338);; Biological Process: response to stress (GO:0006950);; Biological Process: blood coagulation (…	K09422|2e-70|pop:POPTR_1083038|hypothetical protein	Transcription factor MYB44 OS=Arabidopsis thaliana GN=MYB44 PE=2 SV=1	PREDICTED: transcription factor MYB44-like [Fragaria vesca subsp. vesca]
gi_351605760_gb_JP460102.1	0.000362525	2.57799	up	--	--	Cellular Component: mitochondrial outer membrane (GO:0005741);; Biological Process: cell adhesion (GO:0007155);; Cellular Component: chloroplast (GO:0009507);; Biological Process: organ morphogenesis (GO:0009887);; Biological Process: trichome morphogenesis (GO:0010090);; Biological Process: vegetative to reproductive phase transition of meristem (GO:0010228);; Biological Process: protein desumoy…	--	Nuclear control of ATPase protein 2 OS=Dictyostelium discoideum GN=nca2 PE=3 SV=1	PREDICTED: uncharacterized protein LOC100242629 [Vitis vinifera]
gi_351615261_gb_JP469562.1	0.00603108	2.587	up	--	--	--	K14497|2e-06|rcu:RCOM_1049690|protein phosphatase 2c, putative (EC:3.1.3.16)	--	--
gi_351596878_gb_JP451431.1	0.00585207	2.61782	up	--	--	Biological Process: protein polyubiquitination (GO:0000209);; Molecular Function: protein binding (GO:0005515);; Cellular Component: nucleus (GO:0005634);; Cellular Component: cytoplasm (GO:0005737);; Biological Process: fatty acid beta-oxidation (GO:0006635);; Biological Process: hormone-mediated signaling pathway (GO:0009755);; Biological Process: protein import into peroxisome matrix (GO:00165…	K11968|0.0|rcu:RCOM_0938350|Protein ariadne-1, putative	Probable E3 ubiquitin-protein ligase ARI2 OS=Arabidopsis thaliana GN=ARI2 PE=2 SV=1	PREDICTED: probable E3 ubiquitin-protein ligase ARI1-like [Cucumis sativus]
gi_351616488_gb_JP470789.1	2.14e-13	2.65586	up	--	--	Molecular Function: phosphatidylcholine-sterol O-acyltransferase activity (GO:0004607);; Molecular Function: phospholipase activity (GO:0004620);; Cellular Component: extracellular region (GO:0005576);; Cellular Component: mitochondrion (GO:0005739);; Cellular Component: cytosol (GO:0005829);; Biological Process: lipid metabolic process (GO:0006629);; Biological Process: cellular membrane fusion …	--	Phospholipase A(1) LCAT3 OS=Arabidopsis thaliana GN=LCAT3 PE=1 SV=1	hypothetical protein PRUPE_ppa005653mg [Prunus persica]
gi_351609218_gb_JP463519.1	3.41e-06	2.67908	up	--	--	Cellular Component: plasma membrane (GO:0005886);; Cellular Component: plasmodesma (GO:0009506);; Biological Process: primary metabolic process (GO:0044238);; Cellular Component: integral to cytosolic side of endoplasmic reticulum membrane (GO:0071458);; Biological Process: organic substance metabolic process (GO:0071704);; Cellular Component: endoplasmic reticulum tubular network (GO:0071782);; …	--	Reticulon-like protein B13 OS=Arabidopsis thaliana GN=RTNLB13 PE=2 SV=1	PREDICTED: reticulon-like protein B13-like [Fragaria vesca subsp. vesca]
gi_351621474_gb_JP475775.1	2.53e-08	2.6817	up	--	--	Molecular Function: hydrolase activity, hydrolyzing O-glycosyl compounds (GO:0004553);; Cellular Component: cytoplasm (GO:0005737);; Cellular Component: plasma membrane (GO:0005886);; Biological Process: sucrose biosynthetic process (GO:0005986);; Biological Process: galactose metabolic process (GO:0006012);; Biological Process: response to oxidative stress (GO:0006979);; Biological Process: resp…	K06611|0.0|vvi:100245269|hypothetical protein LOC100245269	Stachyose synthase OS=Pisum sativum GN=STS1 PE=1 SV=1	hypothetical protein PRUPE_ppa001276mg [Prunus persica]
gi_351620394_gb_JP474695.1	0.00384349	2.68635	up	--	--	Biological Process: G1/S transition of mitotic cell cycle (GO:0000082);; Biological Process: negative regulation of transcription from RNA polymerase II promoter (GO:0000122);; Molecular Function: DNA binding (GO:0003677);; Molecular Function: chromatin binding (GO:0003682);; Molecular Function: iron ion binding (GO:0005506);; Cellular Component: nucleus (GO:0005634);; Cellular Component: nucleol…	--	Protein polybromo-1 OS=Gallus gallus GN=PBRM1 PE=1 SV=1	PREDICTED: BAH and coiled-coil domain-containing protein 1-like [Cicer arietinum]
gi_351612251_gb_JP466552.1	1.62e-08	2.76493	up	--	--	Molecular Function: ATP binding (GO:0005524);; Biological Process: starch catabolic process (GO:0005983);; Cellular Component: chloroplast stroma (GO:0009570);; Biological Process: plant-type cell wall organization (GO:0009664);; Molecular Function: carbohydrate kinase activity (GO:0019200);; Biological Process: starch biosynthetic process (GO:0019252);; Biological Process: protein autophosphoryl…	--	Phosphoglucan, water dikinase, chloroplastic OS=Oryza sativa subsp. japonica GN=GWD3 PE=2 SV=2	chloroplast alpha-glucan water dikinase, putative [Ricinus communis]
gi_351619193_gb_JP473494.1	0.00906122	2.80475	up	[RTKL]	--	Biological Process: MAPK cascade (GO:0000165);; Biological Process: response to molecule of bacterial origin (GO:0002237);; Molecular Function: protein kinase activity (GO:0004672);; Cellular Component: plasma membrane (GO:0005886);; Biological Process: regulation of transcription, DNA-dependent (GO:0006355);; Biological Process: protein N-linked glycosylation (GO:0006487);; Biological Process: p…	--	Probable receptor-like protein kinase At1g67000 OS=Arabidopsis thaliana GN=At1g67000 PE=2 SV=2	PREDICTED: probable receptor-like protein kinase At5g39020-like [Fragaria vesca subsp. vesca]
gi_351612621_gb_JP466922.1	0.000549623	2.81737	up	--	--	Biological Process: G2 phase of mitotic cell cycle (GO:0000085);; Cellular Component: plasma membrane (GO:0005886);; Biological Process: protein N-linked glycosylation (GO:0006487);; Biological Process: N-terminal protein myristoylation (GO:0006499);; Biological Process: photomorphogenesis (GO:0009640);; Biological Process: cullin deneddylation (GO:0010388);; Biological Process: protein ubiquitin…	--	--	hypothetical protein MTR_2g102050 [Medicago truncatula]
gi_351623040_gb_JP477341.1	6.95e-26	2.81809	up	--	--	--	--	FK506-binding protein 5 OS=Dictyostelium discoideum GN=fkbp5 PE=1 SV=1	PREDICTED: uncharacterized protein LOC100251233 [Vitis vinifera]
gi_351623228_gb_JP477529.1	0.00155094	2.82426	up	--	--	--	--	--	Mutator-like transposase [Arabidopsis thaliana]
gi_351605840_gb_JP460181.1	5.12e-19	2.84216	up	--	--	Cellular Component: lysosomal membrane (GO:0005765);; Biological Process: determination of adult lifespan (GO:0008340);; Molecular Function: arginine transmembrane transporter activity (GO:0015181);; Molecular Function: L-lysine transmembrane transporter activity (GO:0015189);; Biological Process: arginine transport (GO:0015809);; Biological Process: lysine transport (GO:0015819);; Cellular Compo…	--	Uncharacterized membrane protein YOL092W OS=Saccharomyces cerevisiae (strain ATCC 204508 / S288c) GN=YOL092W PE=1 SV=1	hypothetical protein PRUPE_ppa007096mg [Prunus persica]
gi_351621123_gb_JP475424.1	0.000838235	2.87173	up	--	--	Molecular Function: hydrolase activity, hydrolyzing O-glycosyl compounds (GO:0004553);; Cellular Component: cell wall (GO:0005618);; Cellular Component: Golgi apparatus (GO:0005794);; Biological Process: cellular glucan metabolic process (GO:0006073);; Biological Process: response to heat (GO:0009408);; Biological Process: response to cold (GO:0009409);; Cellular Component: plant-type cell wall (…	--	Probable xyloglucan endotransglucosylase/hydrolase protein 16 OS=Arabidopsis thaliana GN=XTH16 PE=2 SV=2	xyloglucan endotransglucosylase/hydrolase 6 [Malus domestica]
gi_351599739_gb_JP454225.1	0.00152433	2.95238	up	--	--	Biological Process: defense response (GO:0006952);; Biological Process: response to biotic stimulus (GO:0009607);; Molecular Function: hydrolase activity (GO:0016787);; Biological Process: cellular metabolic process (GO:0044237);; Biological Process: regulation of cellular process (GO:0050794);; Biological Process: multi-organism process (GO:0051704);; Biological Process: cellular response to sti…	--	Basic 7S globulin 2 OS=Glycine max PE=1 SV=1	xyloglucanase inhibitor 1 [Humulus lupulus]
gi_351621722_gb_JP476023.1	1.47e-05	2.96077	up	--	--	Molecular Function: anion channel activity (GO:0005253);; Cellular Component: plasma membrane (GO:0005886);; Cellular Component: plant-type vacuole membrane (GO:0009705);; Biological Process: response to aluminum ion (GO:0010044);; Biological Process: stomatal movement (GO:0010118);; Cellular Component: endomembrane system (GO:0012505);; Molecular Function: malate transmembrane transporter activi…	--	Aluminum-activated malate transporter 13 OS=Arabidopsis thaliana GN=ALMT13 PE=2 SV=1	PREDICTED: aluminum-activated malate transporter 13-like [Fragaria vesca subsp. vesca]
gi_351610757_gb_JP465058.1	0.00161095	3.03568	up	--	--	Cellular Component: nucleus (GO:0005634);;	--	--	hypothetical protein VITISV_040168 [Vitis vinifera]
gi_351597826_gb_JP452364.1	2.03e-05	3.1229	up	--	--	Biological Process: amino acid transmembrane transport (GO:0003333);; Cellular Component: integral to plasma membrane (GO:0005887);; Biological Process: protein targeting to membrane (GO:0006612);; Biological Process: water transport (GO:0006833);; Biological Process: response to nematode (GO:0009624);; Biological Process: response to salt stress (GO:0009651);; Biological Process: response to fru…	--	Probable amino acid permease 7 OS=Arabidopsis thaliana GN=AAP7 PE=1 SV=1	Amino acid permease, putative isoform 1 [Theobroma cacao]
gi_351614440_gb_JP468741.1	0.00304558	3.14605	up	--	--	Molecular Function: sequence-specific DNA binding transcription factor activity (GO:0003700);; Cellular Component: intracellular (GO:0005622);; Cellular Component: nucleolus (GO:0005730);; Biological Process: glycolysis (GO:0006096);; Biological Process: DNA repair (GO:0006281);; Biological Process: water transport (GO:0006833);; Biological Process: hyperosmotic response (GO:0006972);; Biological…	--	Probable salt tolerance-like protein At1g78600 OS=Arabidopsis thaliana GN=At1g78600 PE=1 SV=2	PREDICTED: probable salt tolerance-like protein At1g78600-like [Cucumis sativus]
gi_351596102_gb_JP450660.1	0.00447834	3.17138	up	[IQR]	--	Molecular Function: nucleotide binding (GO:0000166);; Cellular Component: extracellular region (GO:0005576);; Biological Process: steroid metabolic process (GO:0008202);; Biological Process: response to abscisic acid stimulus (GO:0009737);; Biological Process: response to brassinosteroid stimulus (GO:0009741);; Biological Process: terpenoid biosynthetic process (GO:0016114);; Cellular Component: …	--	11-beta-hydroxysteroid dehydrogenase-like 5 OS=Arabidopsis thaliana GN=HSD5 PE=2 SV=1	hypothetical protein PRUPE_ppa007781mg [Prunus persica]
gi_351618593_gb_JP472894.1	6.33e-09	3.18248	up	--	--	Biological Process: MAPK cascade (GO:0000165);; Biological Process: response to hypoxia (GO:0001666);; Molecular Function: DNA binding (GO:0003677);; Molecular Function: sequence-specific DNA binding transcription factor activity (GO:0003700);; Cellular Component: nucleus (GO:0005634);; Biological Process: regulation of transcription, DNA-dependent (GO:0006355);; Biological Process: protein targe…	--	NAC domain-containing protein 72 OS=Arabidopsis thaliana GN=NAC072 PE=2 SV=1	NAC domain class transcription factor isoform 1 [Theobroma cacao]
gi_351605075_gb_JP459422.1	3.2e-16	3.20308	up	--	--	Biological Process: transition metal ion transport (GO:0000041);; Molecular Function: transcription cofactor activity (GO:0003712);; Cellular Component: nucleus (GO:0005634);; Cellular Component: cytoplasm (GO:0005737);; Cellular Component: vacuole (GO:0005773);; Cellular Component: plasma membrane (GO:0005886);; Biological Process: protein targeting to vacuole (GO:0006623);; Molecular Function: …	--	Protein MOTHER of FT and TF 1 OS=Arabidopsis thaliana GN=MFT PE=2 SV=1	PEBP (phosphatidylethanolamine-binding protein) family protein isoform 3, partial [Theobroma cacao]
gi_351608706_gb_JP463010.1	0.00645474	3.22762	up	--	--	Molecular Function: 1-phosphatidylinositol 4-kinase activity (GO:0004430);; Molecular Function: phosphatidylinositol-4,5-bisphosphate binding (GO:0005546);; Cellular Component: plasma membrane (GO:0005886);; Biological Process: protein phosphorylation (GO:0006468);; Cellular Component: plasmodesma (GO:0009506);; Molecular Function: phosphatidylinositol-3-phosphate binding (GO:0032266);; Molecular…	K00888|9e-35|pop:POPTR_557279|hypothetical protein	Phosphatidylinositol 4-kinase alpha OS=Arabidopsis thaliana GN=PI4KALPHA1 PE=1 SV=2	predicted protein [Populus trichocarpa]
gi_351624722_gb_JP479023.1	2.61e-08	3.24129	up	--	--	Biological Process: vegetative to reproductive phase transition of meristem (GO:0010228);; Cellular Component: membrane (GO:0016020);; Cellular Component: cytoplasmic membrane-bounded vesicle (GO:0016023);;	--	Uncharacterized membrane protein At3g27390 OS=Arabidopsis thaliana GN=At3g27390 PE=1 SV=2	hypothetical protein PRUPE_ppa023196mg [Prunus persica]
gi_351611561_gb_JP465862.1	1.39e-18	3.24584	up	--	--	Cellular Component: cell wall (GO:0005618);; Biological Process: lipid transport (GO:0006869);; Biological Process: defense response (GO:0006952);; Molecular Function: lipid binding (GO:0008289);; Biological Process: response to cold (GO:0009409);; Biological Process: response to water deprivation (GO:0009414);; Biological Process: response to biotic stimulus (GO:0009607);; Biological Process: re…	--	Non-specific lipid-transfer protein OS=Gossypium hirsutum PE=2 SV=1	lipid transfer protein precursor [Vitis vinifera]
gi_351616650_gb_JP470951.1	1.6e-37	3.26936	up	--	--	Molecular Function: protein binding (GO:0005515);;	--	--	PREDICTED: uncharacterized protein LOC101315042 [Fragaria vesca subsp. vesca]
gi_351600629_gb_JP455093.1	0.00293967	3.28391	up	--	--	--	K13648|8e-22|ath:AT1G06780|GAUT6	Probable galacturonosyltransferase 6 OS=Arabidopsis thaliana GN=GAUT6 PE=2 SV=1	PREDICTED: probable galacturonosyltransferase 6-like [Fragaria vesca subsp. vesca]
gi_351612279_gb_JP466580.1	1.27e-24	3.32672	up	--	--	Cellular Component: intracellular membrane-bounded organelle (GO:0043231);; Cellular Component: cytoplasmic part (GO:0044444);;	--	--	PREDICTED: uncharacterized protein LOC100242238 [Vitis vinifera]
gi_351627781_gb_JP480664.1	4.35e-12	3.32701	up	--	--	--	--	--	PREDICTED: uncharacterized protein LOC101217008 [Cucumis sativus]
gi_351608598_gb_JP462903.1	0.000339054	3.34219	up	--	--	--	--	F-box/FBD/LRR-repeat protein At3g26920 OS=Arabidopsis thaliana GN=At3g26920 PE=2 SV=3	hypothetical protein PRUPE_ppa019570mg [Prunus persica]
gi_351611827_gb_JP466128.1	7.93e-49	3.40552	up	--	--	--	--	Non-specific lipid-transfer protein (Fragments) OS=Lycium barbarum PE=1 SV=1	RecName: Full=Non-specific lipid-transfer protein; Short=LTP
gi_351591658_gb_JP450104.1	2.56e-48	3.43073	up	--	--	Biological Process: proteolysis (GO:0006508);; Biological Process: lipid transport (GO:0006869);; Molecular Function: peptidase activity (GO:0008233);; Molecular Function: lipid binding (GO:0008289);;	--	--	PREDICTED: uncharacterized protein LOC101304684 isoform 2 [Fragaria vesca subsp. vesca]
gi_351591172_gb_JP449626.1	0.00808452	3.46941	up	--	--	--	--	--	Avr9/Cf-9 rapidly elicited protein 137 [Nicotiana tabacum]
gi_351612403_gb_JP466704.1	6.84e-05	3.47062	up	--	--	Biological Process: cellular process (GO:0009987);;	--	Proline-rich protein 4 OS=Arabidopsis thaliana GN=PRP4 PE=2 SV=1	predicted protein [Populus trichocarpa]
gi_351604131_gb_JP458485.1	7.32e-17	3.48712	up	--	--	Cellular Component: exocyst (GO:0000145);; Cellular Component: nucleus (GO:0005634);; Cellular Component: cytosol (GO:0005829);; Biological Process: iron ion transport (GO:0006826);; Biological Process: amino acid transport (GO:0006865);; Biological Process: vesicle docking involved in exocytosis (GO:0006904);; Biological Process: cellular response to iron ion starvation (GO:0010106);; Biological…	K07195|0.0|rcu:RCOM_0469800|protein binding protein, putative	Exocyst complex component 7 OS=Rattus norvegicus GN=Exoc7 PE=2 SV=1	PREDICTED: uncharacterized protein LOC101293927 [Fragaria vesca subsp. vesca]
gi_351602040_gb_JP456475.1	0.00120731	3.52115	up	--	--	Molecular Function: DNA binding (GO:0003677);; Molecular Function: sequence-specific DNA binding transcription factor activity (GO:0003700);; Cellular Component: nucleus (GO:0005634);; Cellular Component: plasma membrane (GO:0005886);; Biological Process: regulation of transcription, DNA-dependent (GO:0006355);; Cellular Component: chloroplast envelope (GO:0009941);; Biological Process: regulatio…	--	Squamosa promoter-binding-like protein 1 OS=Arabidopsis thaliana GN=SPL1 PE=1 SV=2	unnamed protein product [Vitis vinifera]
gi_351621467_gb_JP475768.1	2.9e-06	3.5297	up	--	--	Cellular Component: extracellular region (GO:0005576);; Cellular Component: mitochondrion (GO:0005739);; Cellular Component: Golgi apparatus (GO:0005794);; Cellular Component: cytosol (GO:0005829);; Cellular Component: plasma membrane (GO:0005886);; Biological Process: carbohydrate metabolic process (GO:0005975);; Molecular Function: cellulase activity (GO:0008810);; Cellular Component: plant-typ…	--	Endoglucanase 1 OS=Persea americana GN=CEL1 PE=2 SV=1	predicted protein [Populus trichocarpa]
gi_351604579_gb_JP458930.1	0.00965771	3.54793	up	--	--	Molecular Function: monooxygenase activity (GO:0004497);; Cellular Component: endoplasmic reticulum (GO:0005783);; Biological Process: anatomical structure morphogenesis (GO:0009653);; Biological Process: isoflavonoid biosynthetic process (GO:0009717);; Biological Process: positive gravitropism (GO:0009958);; Cellular Component: membrane (GO:0016020);; Molecular Function: oxidoreductase activity,…	--	Cytochrome P450 93A3 OS=Glycine max GN=CYP93A3 PE=2 SV=1	cytochrome P450 [Populus trichocarpa]
gi_351621636_gb_JP475937.1	2.52e-20	3.63962	up	--	--	--	--	--	PREDICTED: uncharacterized protein LOC101309518 [Fragaria vesca subsp. vesca]
gi_351602501_gb_JP456924.1	3.52e-05	3.64215	up	--	--	Molecular Function: protein binding (GO:0005515);; Cellular Component: extracellular region (GO:0005576);; Biological Process: organelle organization (GO:0006996);; Cellular Component: membrane (GO:0016020);; Cellular Component: cytoplasmic membrane-bounded vesicle (GO:0016023);; Biological Process: developmental process (GO:0032502);; Cellular Component: intracellular non-membrane-bounded organe…	--	Formin-like protein 7 OS=Oryza sativa subsp. japonica GN=FH7 PE=2 SV=2	hypothetical protein PRUPE_ppa000222mg [Prunus persica]
gi_351618765_gb_JP473066.1	6.97e-19	3.71779	up	--	--	Biological Process: alternative nuclear mRNA splicing, via spliceosome (GO:0000380);; Molecular Function: second spliceosomal transesterification activity (GO:0000386);; Biological Process: nuclear mRNA 3'-splice site recognition (GO:0000389);; Biological Process: nematode larval development (GO:0002119);; Molecular Function: nucleic acid binding (GO:0003676);; Cellular Component: nucleolus (GO:0…	K12819|0.0|vvi:100249416|hypothetical protein LOC100249416	Pre-mRNA-splicing factor SLU7 OS=Oryza sativa subsp. japonica GN=Os08g0127700 PE=2 SV=1	Pre-mRNA splicing Prp18-interacting factor isoform 2 [Theobroma cacao]
gi_351613888_gb_JP468189.1	0.00164026	3.85352	up	--	--	Molecular Function: hydrolase activity, hydrolyzing O-glycosyl compounds (GO:0004553);; Cellular Component: extracellular region (GO:0005576);; Cellular Component: cell wall (GO:0005618);; Cellular Component: Golgi apparatus (GO:0005794);; Biological Process: cellular glucan metabolic process (GO:0006073);; Biological Process: response to heat (GO:0009408);; Biological Process: response to cold (…	--	Xyloglucan endotransglucosylase/hydrolase protein 22 OS=Arabidopsis thaliana GN=XTH22 PE=1 SV=1	PREDICTED: probable xyloglucan endotransglucosylase/hydrolase protein 23 [Vitis vinifera]
gi_351601069_gb_JP455522.1	1.2e-06	3.85423	up	--	--	--	--	Uncharacterized serine-rich protein C215.13 OS=Schizosaccharomyces pombe (strain 972 / ATCC 24843) GN=SPBC215.13 PE=1 SV=1	PREDICTED: uncharacterized protein LOC100853922 [Vitis vinifera]
gi_351597475_gb_JP452020.1	0.000371636	3.87222	up	--	--	Molecular Function: hydrolase activity, hydrolyzing O-glycosyl compounds (GO:0004553);; Cellular Component: cytoplasm (GO:0005737);; Cellular Component: plasma membrane (GO:0005886);; Biological Process: sucrose biosynthetic process (GO:0005986);; Biological Process: response to oxidative stress (GO:0006979);; Biological Process: response to water deprivation (GO:0009414);; Cellular Component: pl…	--	Probable galactinol--sucrose galactosyltransferase 2 OS=Arabidopsis thaliana GN=RFS2 PE=2 SV=2	Seed imbibition 2 isoform 1 [Theobroma cacao]
gi_351618451_gb_JP472752.1	3.88e-06	4.06525	up	--	--	Biological Process: cation transport (GO:0006812);; Molecular Function: cation transmembrane transporter activity (GO:0008324);; Molecular Function: basic amino acid transmembrane transporter activity (GO:0015174);; Biological Process: basic amino acid transport (GO:0015802);; Cellular Component: integral to membrane (GO:0016021);; Cellular Component: organelle membrane (GO:0031090);; Cellular Co…	--	Uncharacterized membrane protein YOL092W OS=Saccharomyces cerevisiae (strain ATCC 204508 / S288c) GN=YOL092W PE=1 SV=1	hypothetical protein PRUPE_ppa007096mg [Prunus persica]
gi_351591159_gb_JP449615.1	1.84e-23	4.06817	up	--	--	Biological Process: alternative nuclear mRNA splicing, via spliceosome (GO:0000380);; Molecular Function: second spliceosomal transesterification activity (GO:0000386);; Biological Process: nuclear mRNA 3'-splice site recognition (GO:0000389);; Molecular Function: nucleic acid binding (GO:0003676);; Cellular Component: nucleolus (GO:0005730);; Cellular Component: cytoplasm (GO:0005737);; Biologic…	K12819|0.0|vvi:100249416|hypothetical protein LOC100249416	Pre-mRNA-splicing factor SLU7 OS=Oryza sativa subsp. japonica GN=Os08g0127700 PE=2 SV=1	Pre-mRNA splicing Prp18-interacting factor isoform 1 [Theobroma cacao]
gi_351613568_gb_JP467869.1	0.00564749	4.06941	up	--	--	Biological Process: microtubule cytoskeleton organization (GO:0000226);; Biological Process: double-strand break repair via homologous recombination (GO:0000724);; Biological Process: cell morphogenesis (GO:0000902);; Biological Process: cytokinesis by cell plate formation (GO:0000911);; Cellular Component: cell wall (GO:0005618);; Cellular Component: endosome (GO:0005768);; Cellular Component: e…	--	Cellulose synthase-like protein D3 OS=Arabidopsis thaliana GN=CSLD3 PE=1 SV=1	hypothetical protein VITISV_042740 [Vitis vinifera]
gi_351622864_gb_JP477165.1	0.000441699	4.09572	up	--	--	Molecular Function: iron ion binding (GO:0005506);; Cellular Component: cytoplasm (GO:0005737);; Biological Process: syncytium formation (GO:0006949);; Molecular Function: ferric iron binding (GO:0008199);; Biological Process: cellular water homeostasis (GO:0009992);; Biological Process: cellular membrane organization (GO:0016044);; Cellular Component: inclusion body (GO:0016234);; Biological Pro…	K00469|1e-179|vvi:100233007|myo-inositol oxidase	Inositol oxygenase 1 OS=Arabidopsis thaliana GN=MIOX1 PE=2 SV=1	Myo-inositol oxygenase 1 isoform 1 [Theobroma cacao]
gi_351609027_gb_JP463328.1	6.13e-28	4.13729	up	--	--	Biological Process: response to stress (GO:0006950);; Biological Process: response to abiotic stimulus (GO:0009628);;	--	--	PREDICTED: uncharacterized protein LOC101313084 [Fragaria vesca subsp. vesca]
gi_351611328_gb_JP465629.1	0.00241303	4.14713	up	--	--	Molecular Function: protein binding (GO:0005515);; Biological Process: cellular process (GO:0009987);; Molecular Function: hydrolase activity (GO:0016787);; Biological Process: primary metabolic process (GO:0044238);; Biological Process: organic substance metabolic process (GO:0071704);; Cellular Component: cell periphery (GO:0071944);;	--	Proline-rich protein 4 OS=Arabidopsis thaliana GN=PRP4 PE=2 SV=1	PREDICTED: uncharacterized protein LOC101304048 [Fragaria vesca subsp. vesca]
gi_351618590_gb_JP472891.1	6.25e-60	4.21137	up	--	--	Cellular Component: extracellular region (GO:0005576);; Biological Process: proteolysis (GO:0006508);; Biological Process: lipid transport (GO:0006869);; Molecular Function: peptidase activity (GO:0008233);; Molecular Function: lipid binding (GO:0008289);; Cellular Component: plasmodesma (GO:0009506);;	--	Non-specific lipid-transfer protein 4 OS=Arabidopsis thaliana GN=LTP4 PE=3 SV=1	predicted protein [Populus trichocarpa]
gi_351608845_gb_JP463148.1	0.00187514	4.22722	up	--	--	--	--	Late embryogenesis abundant protein D-29 OS=Gossypium hirsutum PE=3 SV=1	cold-induced group 3 LEA WAP27B precursor [Morus bombycis]
gi_351612233_gb_JP466534.1	5.33e-59	4.33558	up	--	--	Molecular Function: protein binding (GO:0005515);; Cellular Component: integral to plasma membrane (GO:0005887);; Biological Process: calcium ion transport (GO:0006816);; Biological Process: copper ion transport (GO:0006825);; Biological Process: Golgi organization (GO:0007030);; Molecular Function: sucrose transmembrane transporter activity (GO:0008515);; Cellular Component: plastid (GO:0009536)…	--	Bidirectional sugar transporter SWEET15 OS=Arabidopsis thaliana GN=SWEET15 PE=2 SV=1	hypothetical protein PRUPE_ppa009789mg [Prunus persica]
gi_351600128_gb_JP454604.1	0.000213923	4.51327	up	--	--	Biological Process: protein import into nucleus, translocation (GO:0000060);; Molecular Function: nucleotide binding (GO:0000166);; Molecular Function: DNA binding (GO:0003677);; Molecular Function: RNA binding (GO:0003723);; Molecular Function: nucleocytoplasmic transporter activity (GO:0005487);; Cellular Component: nucleolus (GO:0005730);; Cellular Component: cytoplasm (GO:0005737);; Biologica…	K12872|4e-50|vvi:100241603|hypothetical protein LOC100241603	Zinc finger CCCH domain-containing protein 49 OS=Oryza sativa subsp. japonica GN=Os07g0281000 PE=2 SV=1	unnamed protein product [Vitis vinifera]
gi_351616156_gb_JP470457.1	2.3e-05	4.60486	up	--	--	Molecular Function: nucleotide binding (GO:0000166);; Molecular Function: RNA binding (GO:0003723);; Molecular Function: protein binding (GO:0005515);; Cellular Component: nucleus (GO:0005634);; Biological Process: regulation of transcription, DNA-dependent (GO:0006355);; Biological Process: defense response (GO:0006952);; Biological Process: response to osmotic stress (GO:0006970);; Biological P…	--	Glycine-rich protein 3 OS=Arabidopsis thaliana GN=GRP3 PE=1 SV=1	Uncharacterized protein TCM_003328 [Theobroma cacao]
gi_351613675_gb_JP467976.1	8.66e-08	4.63746	up	--	--	Biological Process: amino acid transmembrane transport (GO:0003333);; Cellular Component: mitochondrial inner membrane presequence translocase complex (GO:0005744);; Biological Process: response to stress (GO:0006950);; Biological Process: response to organic substance (GO:0010033);; Biological Process: protein transport (GO:0015031);; Molecular Function: amino acid transmembrane transporter acti…	--	Outer envelope pore protein 16-2, chloroplastic OS=Arabidopsis thaliana GN=OEP162 PE=1 SV=1	hypothetical protein PRUPE_ppa012201mg [Prunus persica]
gi_351596139_gb_JP450697.1	0.00784204	4.69572	up	--	--	--	--	Siderophore biosynthesis regulatory protein URBS1 OS=Ustilago maydis (strain 521 / FGSC 9021) GN=URBS1 PE=4 SV=2	--
gi_351618359_gb_JP472660.1	5.61e-05	4.78966	up	--	--	Biological Process: cellular membrane fusion (GO:0006944);; Molecular Function: methyltransferase activity (GO:0008168);; Biological Process: methylation (GO:0032259);; Biological Process: Golgi vesicle transport (GO:0048193);;	--	--	PREDICTED: uncharacterized protein LOC100265673 [Vitis vinifera]
gi_351601855_gb_JP456293.1	2.11e-05	4.93521	up	--	--	Cellular Component: Golgi membrane (GO:0000139);; Molecular Function: nucleotide binding (GO:0000166);; Molecular Function: guanosine-diphosphatase activity (GO:0004382);; Molecular Function: calmodulin binding (GO:0005516);; Cellular Component: extracellular space (GO:0005615);; Cellular Component: mitochondrion (GO:0005739);; Cellular Component: endosome (GO:0005768);; Cellular Component: endop…	K14641|7e-47|osa:4344315|Os07g0682800	Probable apyrase 2 OS=Oryza sativa subsp. japonica GN=APY2 PE=2 SV=1	apyrase-like protein [Nicotiana tabacum]
gi_351613034_gb_JP467335.1	2.39e-35	4.94363	up	--	--	Biological Process: transcription, DNA-dependent (GO:0006351);; Molecular Function: hydrolase activity (GO:0016787);; Biological Process: modulation by virus of host cellular process (GO:0019054);; Biological Process: regulation of nucleobase-containing compound metabolic process (GO:0019219);; Molecular Function: identical protein binding (GO:0042802);; Cellular Component: cell part (GO:0044464)…	--	Protein TsetseEP OS=Glossina palpalis palpalis PE=4 SV=1	hypothetical protein VITISV_013093 [Vitis vinifera]
gi_351612481_gb_JP466782.1	0.0093451	5.03529	up	--	--	Molecular Function: sulfotransferase activity (GO:0008146);; Biological Process: flavonoid metabolic process (GO:0009812);; Cellular Component: intracellular part (GO:0044424);;	--	Cytosolic sulfotransferase 7 OS=Arabidopsis thaliana GN=SOT7 PE=2 SV=1	PREDICTED: cytosolic sulfotransferase 15-like [Fragaria vesca subsp. vesca]
gi_351601127_gb_JP455579.1	1.92e-08	5.09707	up	--	--	Molecular Function: hydrolase activity (GO:0016787);;	--	Retrovirus-related Pol polyprotein from transposon TNT 1-94 OS=Nicotiana tabacum PE=2 SV=1	hypothetical protein VITISV_025518 [Vitis vinifera]
gi_351608066_gb_JP462377.1	0.000119934	5.3923	up	--	--	--	--	--	PREDICTED: uncharacterized protein LOC101314138 [Fragaria vesca subsp. vesca]
gi_351608633_gb_JP462938.1	0.000120018	5.56018	up	--	--	Cellular Component: membrane (GO:0016020);;	--	--	hypothetical protein VITISV_013572 [Vitis vinifera]
gi_351617685_gb_JP471986.1	3.31e-53	6.27615	up	--	--	Molecular Function: ubiquitin-protein ligase activity (GO:0004842);; Molecular Function: protein binding (GO:0005515);; Cellular Component: nucleus (GO:0005634);; Cellular Component: vacuolar membrane (GO:0005774);; Molecular Function: zinc ion binding (GO:0008270);; Biological Process: response to salt stress (GO:0009651);; Biological Process: positive regulation of abscisic acid mediated signal…	--	E3 ubiquitin-protein ligase RHA2A OS=Arabidopsis thaliana GN=RHA2A PE=1 SV=1	RING/U-box superfamily protein [Theobroma cacao]
gi_351603286_gb_JP457645.1	0.00170245	6.5455	up	--	--	Biological Process: defense response (GO:0006952);; Biological Process: response to biotic stimulus (GO:0009607);; Molecular Function: hydrolase activity (GO:0016787);; Biological Process: cellular metabolic process (GO:0044237);; Biological Process: regulation of cellular process (GO:0050794);; Biological Process: multi-organism process (GO:0051704);; Biological Process: cellular response to sti…	--	Basic 7S globulin 2 OS=Glycine max PE=1 SV=1	xyloglucanase inhibitor 1 [Humulus lupulus]
gi_351603557_gb_JP457914.1	0.00124507	Inf	up	--	--	Molecular Function: guanyl-nucleotide exchange factor activity (GO:0005085);; Molecular Function: Rho guanyl-nucleotide exchange factor activity (GO:0005089);; Cellular Component: nucleus (GO:0005634);; Biological Process: cellular membrane fusion (GO:0006944);; Biological Process: plant-type cell wall modification (GO:0009827);; Biological Process: pollen tube growth (GO:0009860);; Molecular Fun…	--	Rop guanine nucleotide exchange factor 2 OS=Arabidopsis thaliana GN=ROPGEF2 PE=1 SV=2	Rop guanine nucleotide exchange factor, putative [Ricinus communis]
gi_351612901_gb_JP467202.1	0.00227377	Inf	up	--	--	Molecular Function: GTP binding (GO:0005525);; Cellular Component: Golgi apparatus (GO:0005794);; Biological Process: small GTPase mediated signal transduction (GO:0007264);; Biological Process: plant-type cell wall modification (GO:0009827);; Biological Process: protein transport (GO:0015031);; Cellular Component: membrane (GO:0016020);; Biological Process: vesicle-mediated transport (GO:0016192…	--	Ras-related protein RGP1 OS=Oryza sativa subsp. japonica GN=RGP1 PE=2 SV=2	protein with unknown function [Ricinus communis]
gi_351604012_gb_JP458366.1	0.00016517	Inf	up	--	--	Molecular Function: anion channel activity (GO:0005253);; Cellular Component: plasma membrane (GO:0005886);; Molecular Function: anion transmembrane transporter activity (GO:0008509);; Cellular Component: plant-type vacuole membrane (GO:0009705);; Biological Process: response to aluminum ion (GO:0010044);; Biological Process: stomatal movement (GO:0010118);; Cellular Component: endomembrane syste…	--	Aluminum-activated malate transporter 14 OS=Arabidopsis thaliana GN=ALMT14 PE=2 SV=1	Aluminum-activated malate transporter 12 [Theobroma cacao]
gi_351601176_gb_JP455628.1	0.000819104	Inf	up	--	--	--	--	N-alpha-acetyltransferase 25, NatB auxiliary subunit OS=Mus musculus GN=Naa25 PE=1 SV=1	hypothetical protein PRUPE_ppa000767mg [Prunus persica]
gi_351600860_gb_JP455318.1	0.000300871	Inf	up	[GEPR]	--	Cellular Component: plasma membrane (GO:0005886);; Biological Process: protein folding (GO:0006457);; Biological Process: purine nucleobase transport (GO:0006863);; Molecular Function: sucrose:hydrogen symporter activity (GO:0008506);; Biological Process: response to heat (GO:0009408);; Biological Process: response to high light intensity (GO:0009644);; Biological Process: response to nitrate (GO…	--	Sugar transport protein 10 OS=Arabidopsis thaliana GN=STP10 PE=2 SV=1	PREDICTED: sugar transport protein 10-like [Cucumis sativus]
gi_351628912_gb_JP481795.1	0.00227377	Inf	up	--	--	--	--	--	hypothetical protein PRUPE_ppa025788mg [Prunus persica]
gi_351609530_gb_JP463831.1	2.15e-06	Inf	up	--	--	--	--	--	hypothetical protein VITISV_016971 [Vitis vinifera]
gi_351602984_gb_JP457344.1	0.00101454	Inf	up	--	--		--	Uncharacterized protein DDB_G0271670 OS=Dictyostelium discoideum GN=DDB_G0271670 PE=4 SV=1	hypothetical protein PRUPE_ppa004755mg [Prunus persica]
gi_351596292_gb_JP450849.1	0.000369236	Inf	up	--	--	Biological Process: Group II intron splicing (GO:0000373);; Molecular Function: RNA binding (GO:0003723);; Biological Process: RNA splicing (GO:0008380);; Cellular Component: chloroplast (GO:0009507);; Biological Process: cellular biosynthetic process (GO:0044249);;	--	Chloroplastic group IIA intron splicing facilitator CRS1, chloroplastic OS=Arabidopsis thaliana GN=At5g16180 PE=2 SV=2	unnamed protein product [Vitis vinifera]
gi_351599816_gb_JP454300.1	0.000112097	Inf	up	[GEPR]	--	Cellular Component: plasma membrane (GO:0005886);; Biological Process: response to water deprivation (GO:0009414);; Biological Process: response to nematode (GO:0009624);; Biological Process: gravitropism (GO:0009630);; Cellular Component: plant-type vacuole membrane (GO:0009705);; Biological Process: response to zinc ion (GO:0010043);; Biological Process: basipetal auxin transport (GO:0010540);;…	--	Protein ZINC INDUCED FACILITATOR 1 OS=Arabidopsis thaliana GN=ZIF1 PE=1 SV=2	Zinc induced facilitator-like 1 isoform 1 [Theobroma cacao]
gi_351609003_gb_JP463304.1	0.00566936	Inf	up	--	--	--	--	Zingipain-2 OS=Zingiber officinale PE=1 SV=1	PREDICTED: thiol protease aleurain-like [Glycine max]
gi_351613774_gb_JP468075.1	0.000201778	Inf	up	--	--	--	--	--	hypothetical protein PRUPE_ppa000142mg [Prunus persica]
gi_351622215_gb_JP476516.1	8.49e-07	Inf	up	--	--	Biological Process: post-embryonic development (GO:0009791);; Cellular Component: intracellular membrane-bounded organelle (GO:0043231);; Cellular Component: cytoplasmic part (GO:0044444);; Biological Process: reproductive structure development (GO:0048608);;	--	Pentatricopeptide repeat-containing protein At2g28050 OS=Arabidopsis thaliana GN=At2g28050 PE=2 SV=1	hypothetical protein PRUPE_ppa015514mg, partial [Prunus persica]
gi_351612000_gb_JP466301.1	1.74e-06	Inf	up	--	--	Molecular Function: sequence-specific DNA binding transcription factor activity (GO:0003700);; Molecular Function: protein binding (GO:0005515);; Cellular Component: intracellular (GO:0005622);; Cellular Component: nucleolus (GO:0005730);; Cellular Component: plasma membrane (GO:0005886);; Biological Process: regulation of transcription, DNA-dependent (GO:0006355);; Biological Process: circadian …	--	Zinc finger protein CONSTANS-LIKE 2 OS=Arabidopsis thaliana GN=COL2 PE=1 SV=1	DNA binding protein, putative [Ricinus communis]
gi_351613839_gb_JP468140.1	0.0042073	Inf	up	--	--	Cellular Component: Golgi membrane (GO:0000139);; Molecular Function: phosphatidylinositol-4,5-bisphosphate 5-phosphatase activity (GO:0004439);; Molecular Function: protein binding (GO:0005515);; Cellular Component: nucleus (GO:0005634);; Cellular Component: mitochondrion (GO:0005739);; Cellular Component: Golgi apparatus (GO:0005794);; Biological Process: protein N-linked glycosylation (GO:0006…	--	Phosphoinositide phosphatase SAC1 OS=Arabidopsis thaliana GN=SAC1 PE=1 SV=1	hypothetical protein M569_05268, partial [Genlisea aurea]
gi_351608158_gb_JP462468.1	0.000448207	Inf	up	--	--	Molecular Function: binding (GO:0005488);; Molecular Function: transferase activity, transferring phosphorus-containing groups (GO:0016772);;	--	--	PREDICTED: uncharacterized protein LOC101212632 [Cucumis sativus]
gi_351620385_gb_JP474686.1	0.0022772	Inf	up	--	--	Molecular Function: binding (GO:0005488);;	--	Uncharacterized mitochondrial protein AtMg00310 OS=Arabidopsis thaliana GN=AtMg00310 PE=4 SV=1	hypothetical protein PRUPE_ppa016553mg [Prunus persica]
gi_351600718_gb_JP455180.1	0.00798365	Inf	up	--	--	Biological Process: MAPK cascade (GO:0000165);; Molecular Function: DNA binding (GO:0003677);; Molecular Function: sequence-specific DNA binding transcription factor activity (GO:0003700);; Cellular Component: nucleus (GO:0005634);; Biological Process: protein targeting to membrane (GO:0006612);; Biological Process: response to bacterium (GO:0009617);; Biological Process: systemic acquired resist…	--	Transcription factor FAMA OS=Arabidopsis thaliana GN=FMA PE=1 SV=1	hypothetical protein PRUPE_ppa020429mg [Prunus persica]
gi_351601797_gb_JP456235.1	0.000447041	Inf	up	--	--	Biological Process: anthocyanin-containing compound biosynthetic process (GO:0009718);; Biological Process: response to sucrose stimulus (GO:0009744);; Biological Process: response to UV-B (GO:0010224);; Molecular Function: transferase activity, transferring hexosyl groups (GO:0016758);; Molecular Function: UDP-xylosyltransferase activity (GO:0035252);; Biological Process: pigmentation (GO:004347…	--	Anthocyanidin 3-O-glucoside 2&apos;&apos;-O-glucosyltransferase OS=Ipomoea purpurea GN=3GGT PE=2 SV=1	unknown [Glycine max]
gi_351621992_gb_JP476293.1	9.44e-05	#NAME?	down	--	--	Molecular Function: catalytic activity (GO:0003824);;	--	Retrovirus-related Pol polyprotein from transposon TNT 1-94 OS=Nicotiana tabacum PE=2 SV=1	hypothetical protein VITISV_030301 [Vitis vinifera]
gi_351595736_gb_JP450301.1	0.0010205	#NAME?	down	--	--	Molecular Function: magnesium ion binding (GO:0000287);; Biological Process: metabolic process (GO:0008152);; Molecular Function: terpene synthase activity (GO:0010333);; Biological Process: geranyl diphosphate metabolic process (GO:0033383);; Biological Process: farnesyl diphosphate metabolic process (GO:0045338);; Molecular Function: (+)-delta-cadinene synthase activity (GO:0047461);;	--	Probable terpene synthase 2 OS=Ricinus communis GN=TPS2 PE=3 SV=1	STS1 [Humulus lupulus]
gi_351603034_gb_JP457394.1	0.00130927	#NAME?	down	--	--	--	--	--	conserved hypothetical protein [Ricinus communis]
gi_351590830_gb_JP449288.1	0.000628896	#NAME?	down	--	--	--	--	--	PREDICTED: uncharacterized protein LOC100853326, partial [Vitis vinifera]
gi_351595591_gb_JP450157.1	3.89e-06	#NAME?	down	--	--	--	--	Putative ribonuclease H protein At1g65750 OS=Arabidopsis thaliana GN=At1g65750 PE=3 SV=1	hypothetical protein [Beta vulgaris subsp. vulgaris]
gi_351616676_gb_JP470977.1	2.34e-05	#NAME?	down	--	--	--	--	--	hypothetical protein PRUPE_ppb016054mg [Prunus persica]
gi_351608298_gb_JP462606.1	0.00019346	#NAME?	down	--	--	Biological Process: polysaccharide biosynthetic process (GO:0000271);; Molecular Function: calcium-dependent protein serine/threonine phosphatase activity (GO:0004723);; Molecular Function: calcium ion binding (GO:0005509);; Biological Process: detection of calcium ion (GO:0005513);; Molecular Function: protein binding (GO:0005515);; Cellular Component: cytoplasm (GO:0005737);; Cellular Component…	--	Calcineurin B-like protein 4 OS=Arabidopsis thaliana GN=CBL4 PE=1 SV=3	PREDICTED: calcineurin B-like protein 4-like [Fragaria vesca subsp. vesca]
gi_351604486_gb_JP458837.1	0.000625876	#NAME?	down	--	--	Molecular Function: serine-type carboxypeptidase activity (GO:0004185);; Cellular Component: extracellular space (GO:0005615);; Cellular Component: vacuole (GO:0005773);; Biological Process: proteolysis (GO:0006508);; Cellular Component: plant-type cell wall (GO:0009505);; Cellular Component: plasmodesma (GO:0009506);; Biological Process: brassinosteroid mediated signaling pathway (GO:0009742);; …	--	Serine carboxypeptidase-like 45 OS=Arabidopsis thaliana GN=SCPL45 PE=2 SV=1	hypothetical protein PRUPE_ppa005457mg [Prunus persica]
gi_351629430_gb_JP482313.1	5.53e-05	#NAME?	down	--	--	Molecular Function: binding (GO:0005488);; Biological Process: defense response (GO:0006952);; Cellular Component: cell part (GO:0044464);;	--	Disease resistance protein RPM1 OS=Arabidopsis thaliana GN=RPM1 PE=1 SV=1	PREDICTED: disease resistance protein RPM1-like [Vitis vinifera]
gi_351612483_gb_JP466784.1	1.21e-14	#NAME?	down	--	--	--	--	--	predicted protein [Populus trichocarpa]
gi_351597986_gb_JP452520.1	2.94e-05	#NAME?	down	--	--	Molecular Function: protein binding (GO:0005515);; Cellular Component: early endosome (GO:0005769);; Cellular Component: Golgi apparatus (GO:0005794);; Cellular Component: cilium (GO:0005929);; Biological Process: glucuronoxylan metabolic process (GO:0010413);; Cellular Component: membrane (GO:0016020);; Cellular Component: cytoplasmic membrane-bounded vesicle (GO:0016023);; Biological Process: d…	--	Type I inositol 1,4,5-trisphosphate 5-phosphatase CVP2 OS=Arabidopsis thaliana GN=CVP2 PE=1 SV=2	predicted protein [Populus trichocarpa]
gi_351600859_gb_JP455317.1	7.51e-05	#NAME?	down	[KL]	--	Biological Process: negative regulation of transcription from RNA polymerase II promoter (GO:0000122);; Biological Process: chromatin silencing at rDNA (GO:0000183);; Cellular Component: condensed chromosome (GO:0000793);; Molecular Function: RNA polymerase II regulatory region sequence-specific DNA binding (GO:0000977);; Molecular Function: RNA polymerase II repressing transcription factor bindi…	K11643|1e-177|rcu:RCOM_0921900|chromodomain helicase DNA binding protein, putative (EC:2.7.11.1)	CHD3-type chromatin-remodeling factor PICKLE OS=Arabidopsis thaliana GN=PKL PE=1 SV=1	Chromatin remodeling factor CHD3 (PICKLE) isoform 3 [Theobroma cacao]
gi_351606227_gb_JP460556.1	2.81e-137	#NAME?	down	--	--	Molecular Function: protein binding (GO:0005515);; Cellular Component: nucleus (GO:0005634);; Cellular Component: plasma membrane (GO:0005886);; Biological Process: cellular protein localization (GO:0034613);; Biological Process: regulation of biological process (GO:0050789);;	--	B3 domain-containing transcription factor VRN1 OS=Arabidopsis thaliana GN=VRN1 PE=1 SV=1	PREDICTED: uncharacterized protein LOC101294583 [Fragaria vesca subsp. vesca]
gi_351617096_gb_JP471397.1	0.00113515	#NAME?	down	--	--	--	--	--	putative TNP2-like transposon protein [Arabidopsis thaliana]
gi_351599647_gb_JP454136.1	6.08e-05	#NAME?	down	--	--	--	--	Uncharacterized protein DDB_G0271670 OS=Dictyostelium discoideum GN=DDB_G0271670 PE=4 SV=1	PREDICTED: uncharacterized protein LOC100260846 isoform 1 [Vitis vinifera]
gi_351608292_gb_JP462600.1	2.34e-05	#NAME?	down	--	--	--	--	--	PREDICTED: uncharacterized protein LOC101298027 [Fragaria vesca subsp. vesca]
gi_351628320_gb_JP481203.1	0.00163606	#NAME?	down	--	--	Cellular Component: chloroplast thylakoid (GO:0009534);; Cellular Component: chloroplast envelope (GO:0009941);;	--	Rhodanese-like domain-containing protein 10 OS=Arabidopsis thaliana GN=STR10 PE=2 SV=1	predicted protein [Populus trichocarpa]
gi_351612482_gb_JP466783.1	0.000194464	#NAME?	down	--	--	Cellular Component: extracellular region (GO:0005576);; Cellular Component: intrinsic to membrane (GO:0031224);;	--	Blue copper protein OS=Arabidopsis thaliana GN=BCB PE=1 SV=2	Cucumber peeling cupredoxin, putative [Ricinus communis]
gi_351624504_gb_JP478805.1	0.00102258	#NAME?	down	--	--	Cellular Component: cytoplasm (GO:0005737);; Molecular Function: transferase activity, transferring acyl groups (GO:0016746);;	--	--	Anthranilate N-benzoyltransferase protein, putative [Ricinus communis]
gi_351611783_gb_JP466084.1	3.89e-11	#NAME?	down	--	--	Cellular Component: mitochondrial inner membrane (GO:0005743);; Biological Process: mitochondrial transport (GO:0006839);; Cellular Component: integral to membrane (GO:0016021);; Biological Process: transmembrane transport (GO:0055085);;	--	--	PREDICTED: solute carrier family 25 member 44-like [Fragaria vesca subsp. vesca]
gi_351618361_gb_JP472662.1	0.000306003	#NAME?	down	--	--	Cellular Component: nucleus (GO:0005634);;	--	B3 domain-containing protein At1g49475 OS=Arabidopsis thaliana GN=At1g49475 PE=2 SV=2	hypothetical protein PRUPE_ppa018806mg [Prunus persica]
gi_351599368_gb_JP453865.1	0.00139496	#NAME?	down	--	--	Cellular Component: extracellular region (GO:0005576);; Cellular Component: plasma membrane (GO:0005886);; Biological Process: response to ethylene stimulus (GO:0009723);; Biological Process: multidimensional cell growth (GO:0009825);;	--	--	PREDICTED: uncharacterized protein LOC101490938 [Cicer arietinum]
gi_351607520_gb_JP461841.1	1.48e-05	#NAME?	down	--	--	--	--	Fasciclin-like arabinogalactan protein 12 OS=Arabidopsis thaliana GN=FLA12 PE=2 SV=2	predicted protein [Populus trichocarpa]
gi_351603236_gb_JP457595.1	9.69e-05	#NAME?	down	--	--	Biological Process: respiratory burst involved in defense response (GO:0002679);; Molecular Function: peroxidase activity (GO:0004601);; Cellular Component: nucleus (GO:0005634);; Cellular Component: endoplasmic reticulum (GO:0005783);; Cellular Component: Golgi apparatus (GO:0005794);; Cellular Component: plasma membrane (GO:0005886);; Biological Process: protein targeting to membrane (GO:000661…	--	Peroxidase 3 OS=Arabidopsis thaliana GN=PER3 PE=2 SV=1	hypothetical protein PRUPE_ppa024711mg [Prunus persica]
gi_351599392_gb_JP453888.1	1.1e-05	-4.60157	down	[E]	Amino acid transport and metabolism	Biological Process: alcohol metabolic process (GO:0006066);; Biological Process: defense response (GO:0006952);; Molecular Function: oxidoreductase activity, acting on CH-OH group of donors (GO:0016614);; Biological Process: carboxylic acid metabolic process (GO:0019752);; Cellular Component: intracellular membrane-bounded organelle (GO:0043231);; Biological Process: primary metabolic process (GO…	K08248|3e-91|pop:POPTR_421315|hypothetical protein	(R)-mandelonitrile lyase 1 OS=Prunus serotina GN=MDL1 PE=1 SV=1	hypothetical protein PRUPE_ppa015533mg, partial [Prunus persica]
gi_351622792_gb_JP477093.1	9.28e-05	-4.38667	down	[E]	Amino acid transport and metabolism	Biological Process: defense response (GO:0006952);; Biological Process: cell-cell signaling (GO:0007267);; Biological Process: embryo sac development (GO:0009553);; Biological Process: fatty acid omega-oxidation (GO:0010430);; Molecular Function: oxidoreductase activity, acting on CH-OH group of donors (GO:0016614);; Cellular Component: cell part (GO:0044464);; Biological Process: cyanide biosynt…	K08248|1e-111|vvi:100254058|hypothetical protein LOC100254058	(R)-mandelonitrile lyase 1 OS=Prunus serotina GN=MDL1 PE=1 SV=1	PREDICTED: LOW QUALITY PROTEIN: (R)-mandelonitrile lyase 2-like [Fragaria vesca subsp. vesca]
gi_351600928_gb_JP455385.1	1.9e-07	-4.29546	down	[E]	Amino acid transport and metabolism	Biological Process: alcohol metabolic process (GO:0006066);; Biological Process: defense response (GO:0006952);; Biological Process: cell-cell signaling (GO:0007267);; Biological Process: embryo sac development (GO:0009553);; Biological Process: fatty acid omega-oxidation (GO:0010430);; Molecular Function: oxidoreductase activity, acting on CH-OH group of donors (GO:0016614);; Cellular Component:…	K08248|0.0|vvi:100254058|hypothetical protein LOC100254058	(R)-mandelonitrile lyase 1 OS=Prunus serotina GN=MDL1 PE=1 SV=1	hypothetical protein PRUPE_ppa015533mg, partial [Prunus persica]
gi_351621557_gb_JP475858.1	0.00154564	-3.6516	down	[E]	Amino acid transport and metabolism	Molecular Function: intracellular ligand-gated ion channel activity (GO:0005217);; Molecular Function: extracellular ligand-gated ion channel activity (GO:0005230);; Molecular Function: calcium channel activity (GO:0005262);; Molecular Function: protein binding (GO:0005515);; Cellular Component: nucleus (GO:0005634);; Biological Process: transport (GO:0006810);; Biological Process: calcium ion tr…	--	Glutamate receptor 2.7 OS=Arabidopsis thaliana GN=GLR2.7 PE=2 SV=3	Glutamate receptor 2.9 [Theobroma cacao]
gi_351605867_gb_JP460208.1	4.57e-08	-3.2829	down	[E]	Amino acid transport and metabolism	Molecular Function: transporter activity (GO:0005215);; Molecular Function: calcium ion binding (GO:0005509);; Molecular Function: protein binding (GO:0005515);; Cellular Component: Golgi apparatus (GO:0005794);; Cellular Component: plasma membrane (GO:0005886);; Biological Process: polysaccharide metabolic process (GO:0005976);; Biological Process: nitrogen compound metabolic process (GO:0006807…	--	Nitrate transporter 1.2 OS=Arabidopsis thaliana GN=NRT1.2 PE=1 SV=1	hypothetical protein PRUPE_ppa003360mg [Prunus persica]
gi_351602034_gb_JP456469.1	0.00185323	-2.66949	down	[E]	Amino acid transport and metabolism	Molecular Function: transporter activity (GO:0005215);; Molecular Function: calcium ion binding (GO:0005509);; Molecular Function: protein binding (GO:0005515);; Cellular Component: Golgi apparatus (GO:0005794);; Cellular Component: plasma membrane (GO:0005886);; Biological Process: polysaccharide metabolic process (GO:0005976);; Biological Process: nitrogen compound metabolic process (GO:0006807…	--	Nitrate transporter 1.2 OS=Arabidopsis thaliana GN=NRT1.2 PE=1 SV=1	hypothetical protein PRUPE_ppa003360mg [Prunus persica]
gi_351599295_gb_JP453792.1	1.29e-06	-2.60726	down	[E]	Amino acid transport and metabolism	Molecular Function: protein binding (GO:0005515);; Cellular Component: Golgi apparatus (GO:0005794);; Cellular Component: plasma membrane (GO:0005886);; Biological Process: oligopeptide transport (GO:0006857);; Biological Process: intra-Golgi vesicle-mediated transport (GO:0006891);; Biological Process: response to water deprivation (GO:0009414);; Cellular Component: plasmodesma (GO:0009506);; Bi…	--	Nitrate transporter 1.1 OS=Arabidopsis thaliana GN=NRT1.1 PE=1 SV=1	nitrate transporter [Prunus persica]
gi_351599480_gb_JP453973.1	6.89e-06	-2.60061	down	[E]	Amino acid transport and metabolism	Molecular Function: glutamate decarboxylase activity (GO:0004351);; Molecular Function: calmodulin binding (GO:0005516);; Cellular Component: nucleus (GO:0005634);; Cellular Component: cytosol (GO:0005829);; Biological Process: glutamate metabolic process (GO:0006536);; Biological Process: protein targeting to membrane (GO:0006612);; Biological Process: water transport (GO:0006833);; Cellular Com…	K01580|0.0|pop:POPTR_569405|hypothetical protein	Glutamate decarboxylase 5 OS=Arabidopsis thaliana GN=GAD5 PE=2 SV=1	PREDICTED: glutamate decarboxylase-like [Glycine max]
gi_351624285_gb_JP478586.1	4.72e-14	-2.58737	down	[E]	Amino acid transport and metabolism	Molecular Function: protein binding (GO:0005515);; Cellular Component: Golgi apparatus (GO:0005794);; Cellular Component: plasma membrane (GO:0005886);; Biological Process: oligopeptide transport (GO:0006857);; Biological Process: response to water deprivation (GO:0009414);; Cellular Component: plasmodesma (GO:0009506);; Biological Process: response to wounding (GO:0009611);; Biological Process: …	--	Nitrate transporter 1.1 OS=Arabidopsis thaliana GN=NRT1.1 PE=1 SV=1	nitrate transporter [Prunus persica]
gi_351591353_gb_JP449801.1	7.08e-05	-2.41474	down	[E]	Amino acid transport and metabolism	Molecular Function: prephenate dehydratase activity (GO:0004664);; Cellular Component: cytosol (GO:0005829);; Biological Process: tyrosine biosynthetic process (GO:0006571);; Biological Process: protein targeting to membrane (GO:0006612);; Biological Process: L-phenylalanine biosynthetic process (GO:0009094);; Cellular Component: chloroplast (GO:0009507);; Biological Process: response to wounding…	--	Arogenate dehydratase/prephenate dehydratase 1, chloroplastic OS=Arabidopsis thaliana GN=ADT1 PE=1 SV=1	arogenate/prephenate dehydratase [Populus trichocarpa]
[truncated: 406 more rows]

## Sheet: Up-regulated
#ID	FDR	log2FC	regulated	COG_class	COG_class_annotation	GO_annotation	KEGG_annotation	Swissprot_annotation	nr_annotation
[truncated: 394 more rows]

## Sheet: Down-regulated
#ID	FDR	log2FC	regulated	COG_class	COG_class_annotation	GO_annotation	KEGG_annotation	Swissprot_annotation	nr_annotation
[truncated: 864 more rows]
