# Supplementary material for: Genome-Wide Expression Profiles of Hemp (Cannabis sativa L.) in Response to Drought Stress
Source: Int J Genomics. 2018 May 15;2018:3057272. doi: 10.1155/2018/3057272 (PMC5976996; doi:10.1155/2018/3057272)
Supplement: Supplementary 4 — Table S3: summary of GO-enriched DEGs. [file 3057272.f4.xlsx]

## Sheet: DEGs. GO.ALL
gi_351590772_gb_JP449230.1	GO:0000287	GO:0002539	GO:0003869	GO:0004301	GO:0004715	GO:0005102	GO:0005730	GO:0005777	GO:0005794	GO:0005829	GO:0005925	GO:0008152	GO:0010628	GO:0015643	GO:0019233	GO:0019373	GO:0042221	GO:0042577	GO:0042632	GO:0042803	GO:0043651	GO:0045777	GO:0046272	GO:0046839	GO:0090181
gi_351590806_gb_JP449264.1	GO:0005774	GO:0006811	GO:0009399	GO:0009877	GO:0016021	GO:0055072	GO:0071281	GO:0071369	GO:0071732
gi_351590831_gb_JP449289.1	GO:0000165	GO:0003723	GO:0003824	GO:0005515	GO:0005773	GO:0005777	GO:0005794	GO:0005840	GO:0006098	GO:0006364	GO:0006612	GO:0006636	GO:0007623	GO:0009506	GO:0009579	GO:0009595	GO:0009611	GO:0009637	GO:0009640	GO:0009686	GO:0009697	GO:0009793	GO:0009845	GO:0009853	GO:0009862	GO:0009867	GO:0009902	GO:0009909	GO:0009933	GO:0009941	GO:0009965	GO:0010027	GO:0010114	GO:0010162	GO:0010182	GO:0010200	GO:0010207	GO:0010218	GO:0010228	GO:0010287	GO:0010297	GO:0010310	GO:0010319	GO:0010363	GO:0015995	GO:0016020	GO:0016117	GO:0016567	GO:0019288
gi_351590850_gb_JP449308.1	GO:0016787
gi_351590857_gb_JP449315.1	GO:0005576	GO:0030247
gi_351590865_gb_JP449323.1	GO:0005506	GO:0005737	GO:0009416	GO:0009685	GO:0009725	GO:0016706	GO:0055114
gi_351590887_gb_JP449345.1	GO:0004601	GO:0005773	GO:0005774	GO:0005794	GO:0006811	GO:0006979	GO:0009269	GO:0009409	GO:0009416	GO:0009505	GO:0009506	GO:0009809	GO:0009826	GO:0010075	GO:0016020	GO:0020037	GO:0033554	GO:0042538	GO:0042742	GO:0046872	GO:0048046	GO:0048653	GO:0050832	GO:0052033	GO:0055114	GO:0072593
gi_351590889_gb_JP449347.1	GO:0000165	GO:0000166	GO:0000168	GO:0000169	GO:0000915	GO:0000919	GO:0001411	GO:0004674	GO:0004691	GO:0004708	GO:0005515	GO:0005524	GO:0005634	GO:0005635	GO:0005829	GO:0006270	GO:0006275	GO:0006306	GO:0007257	GO:0008283	GO:0009524	GO:0009793	GO:0009913	GO:0010103	GO:0010229	GO:0016491	GO:0016572	GO:0019901	GO:0034599	GO:0043123	GO:0043167	GO:0043622	GO:0045893	GO:0046777	GO:0048046	GO:0048468	GO:0051567	GO:0051726	GO:0070791	GO:0071260	GO:0071474	GO:1900376
gi_351590924_gb_JP449381.1	GO:0004091	GO:0004104	GO:0004560	GO:0005576	GO:0009505	GO:0009506	GO:0016298	GO:0019761	GO:0019863	GO:0043231	GO:0044238	GO:0044444	GO:0048046	GO:0071554
gi_351591013_gb_JP449470.1	GO:0000038	GO:0005488	GO:0005783	GO:0009733	GO:0009809	GO:0009813	GO:0010224	GO:0016020	GO:0016491	GO:0016711	GO:0043069	GO:0046424	GO:0046872	GO:0080132
gi_351591074_gb_JP449530.1	GO:0004864	GO:0004872	GO:0005515	GO:0005634	GO:0005739	GO:0006569	GO:0009062	GO:0009507	GO:0009684	GO:0009738	GO:0009789	GO:0010029	GO:0010427	GO:0019761	GO:0042803	GO:0080163
gi_351591119_gb_JP449575.1	GO:0000271	GO:0005515	GO:0005634	GO:0005794	GO:0005886	GO:0005887	GO:0005938	GO:0006833	GO:0006896	GO:0007389	GO:0008361	GO:0009062	GO:0009507	GO:0009651	GO:0009705	GO:0009734	GO:0009750	GO:0009825	GO:0009834	GO:0009926	GO:0009932	GO:0010075	GO:0032973	GO:0034639	GO:0043090	GO:0043481	GO:0048767	GO:0051453	GO:0071555	GO:0080144	GO:0080171	GO:0090355	GO:0090358
gi_351591129_gb_JP449585.1	GO:0000271	GO:0004674	GO:0005524	GO:0005576	GO:0005886	GO:0006073	GO:0006468	GO:0007020	GO:0007169	GO:0007267	GO:0009556	GO:0009560	GO:0009616	GO:0009664	GO:0009736	GO:0009742	GO:0009825	GO:0009855	GO:0009887	GO:0009932	GO:0009944	GO:0010014	GO:0010051	GO:0010075	GO:0010150	GO:0010152	GO:0010267	GO:0010817	GO:0016021	GO:0032440	GO:0033612	GO:0035196	GO:0043481	GO:0044249	GO:0048439	GO:0048653	GO:0048767	GO:0051510	GO:0051607	GO:0055114	GO:1901137
gi_351591157_gb_JP449613.1	GO:0006952	GO:0010033	GO:0016787	GO:0044237	GO:0050794	GO:0051707	GO:0051716	GO:0071704
gi_351591159_gb_JP449615.1	GO:0000380	GO:0000386	GO:0000389	GO:0003676	GO:0005730	GO:0005737	GO:0006886	GO:0007275	GO:0008270	GO:0008284	GO:0016607	GO:0030532	GO:0030628	GO:0033554	GO:0048610	GO:0048856	GO:0071013
gi_351591167_gb_JP449623.1	GO:0000038	GO:0005488	GO:0005506	GO:0005618	GO:0005739	GO:0005783	GO:0005886	GO:0009055	GO:0009733	GO:0009809	GO:0009813	GO:0010224	GO:0016020	GO:0016099	GO:0016711	GO:0020037	GO:0031668	GO:0033554	GO:0033772	GO:0043069	GO:0046424	GO:0055114	GO:0080132
gi_351591174_gb_JP449628.1
gi_351591204_gb_JP449658.1	GO:0004553	GO:0005576	GO:0005618	GO:0005976	GO:0006073	GO:0009505	GO:0009506	GO:0009507	GO:0009612	GO:0009645	GO:0009733	GO:0009826	GO:0010015	GO:0010154	GO:0010817	GO:0016020	GO:0016762	GO:0016798	GO:0016998	GO:0042546	GO:0048046	GO:0048573	GO:0080086
gi_351591232_gb_JP449682.1	GO:0000165	GO:0004751	GO:0005737	GO:0006098	GO:0006546	GO:0006569	GO:0006612	GO:0006636	GO:0006766	GO:0008219	GO:0009052	GO:0009106	GO:0009108	GO:0009409	GO:0009535	GO:0009570	GO:0009595	GO:0009684	GO:0009695	GO:0009697	GO:0009862	GO:0009867	GO:0009941	GO:0010200	GO:0010228	GO:0010310	GO:0010363	GO:0019253	GO:0019288	GO:0019344	GO:0019684	GO:0019748	GO:0031348	GO:0042742	GO:0043900	GO:0050832
gi_351591239_gb_JP449689.1	GO:0016020	GO:0016709	GO:0018675	GO:0043231	GO:0046872	GO:0055114
gi_351591256_gb_JP449705.1	GO:0004575	GO:0005515	GO:0005634	GO:0005739	GO:0005829	GO:0005886	GO:0005982	GO:0005987	GO:0006520	GO:0006970	GO:0009507	GO:0009611	GO:0009805	GO:0010075	GO:0033926	GO:0042542	GO:0046686	GO:0048364	GO:0048825
gi_351591260_gb_JP449709.1	GO:0005737	GO:0008171	GO:0009701	GO:0009812	GO:0009821	GO:0030746	GO:0030761	GO:0030766	GO:0032259	GO:0033799	GO:0033800	GO:0042803
gi_351591275_gb_JP449724.1	GO:0005199	GO:0005576	GO:0005829	GO:0006949	GO:0009505	GO:0009506	GO:0009507	GO:0009664	GO:0009739	GO:0009826	GO:0009828	GO:0009831	GO:0010114	GO:0010119	GO:0016020	GO:0016023	GO:0046685
gi_351591307_gb_JP449755.1	GO:0006412	GO:0009535	GO:0009941	GO:0010287	GO:0016876	GO:0043039	GO:0097159
gi_351591326_gb_JP449774.1	GO:0004497	GO:0005506	GO:0005515	GO:0005783	GO:0006950	GO:0008284	GO:0009055	GO:0009411	GO:0009699	GO:0009813	GO:0010033	GO:0010075	GO:0010229	GO:0010338	GO:0016705	GO:0019825	GO:0020037	GO:0033772	GO:0040009	GO:0044425	GO:0046622	GO:0046872	GO:0048316	GO:0048366	GO:0048445	GO:0048504	GO:0051781	GO:0055114
gi_351591331_gb_JP449779.1	GO:0000156	GO:0003677	GO:0003700	GO:0005488	GO:0005515	GO:0005634	GO:0006364	GO:0006417	GO:0006725	GO:0007623	GO:0009651	GO:0009736	GO:0009737	GO:0009873	GO:0009902	GO:0009910	GO:0009944	GO:0009956	GO:0009965	GO:0010027	GO:0010029	GO:0010051	GO:0010082	GO:0010119	GO:0010150	GO:0010158	GO:0010207	GO:0010229	GO:0010380	GO:0031537	GO:0034641	GO:0035304	GO:0042793	GO:0045893	GO:0046483	GO:0048481	GO:0048576	GO:0080022	GO:0080113
gi_351591353_gb_JP449801.1	GO:0004664	GO:0005829	GO:0006571	GO:0006612	GO:0009094	GO:0009507	GO:0009611	GO:0009805	GO:0009963	GO:0010048	GO:0010244	GO:0010363	GO:0016597	GO:0043481	GO:0046417	GO:0047769	GO:0048440	GO:0080167
gi_351591363_gb_JP449811.1	GO:0004499	GO:0005488	GO:0005634	GO:0005773	GO:0006661	GO:0006811	GO:0033506	GO:0042744	GO:0046394	GO:0050660	GO:0050661	GO:0050794	GO:0050832	GO:0055114	GO:0080102	GO:0080103	GO:0080104	GO:0080105	GO:0080106	GO:0080107
gi_351591399_gb_JP449846.1	GO:0003824	GO:0005488	GO:0009987	GO:0050896
gi_351591414_gb_JP449861.1	GO:0006635	GO:0009507	GO:0016558
gi_351591464_gb_JP449911.1	GO:0000271	GO:0000272	GO:0004672	GO:0004703	GO:0005515	GO:0005524	GO:0005886	GO:0005982	GO:0006073	GO:0006468	GO:0006952	GO:0006996	GO:0007165	GO:0007169	GO:0007389	GO:0008356	GO:0008361	GO:0008544	GO:0009617	GO:0009628	GO:0009664	GO:0009725	GO:0009790	GO:0009832	GO:0009886	GO:0009887	GO:0009889	GO:0009926	GO:0009933	GO:0010015	GO:0010016	GO:0010075	GO:0010431	GO:0010468	GO:0016020	GO:0016021	GO:0016049	GO:0022402	GO:0022603	GO:0030154	GO:0032440	GO:0034645	GO:0040008	GO:0043231	GO:0044444	GO:0048366	GO:0048443	GO:0048580	GO:0048589
gi_351591514_gb_JP449961.1	GO:0000724	GO:0010332	GO:0097159
gi_351591524_gb_JP449971.1	GO:0009523	GO:0009535	GO:0015979
gi_351591539_gb_JP449985.1	GO:0005576	GO:0005886	GO:0005975	GO:0006826	GO:0006879	GO:0009845	GO:0009855	GO:0009944	GO:0010014	GO:0010075	GO:0010106	GO:0010167	GO:0010413	GO:0015137	GO:0015706	GO:0016023	GO:0016036	GO:0016985	GO:0019375	GO:0045492	GO:0045892	GO:0071281	GO:0071369	GO:0071732	GO:0071944
gi_351591563_gb_JP450009.1	GO:0004672	GO:0005515	GO:0005737	GO:0006952	GO:0006955	GO:0008544	GO:0009059	GO:0009617	GO:0009755	GO:0009886	GO:0016020	GO:0016049	GO:0030154	GO:0032989	GO:0033993	GO:0038023	GO:0043412	GO:0044238	GO:0044249	GO:0044260	GO:0045229	GO:0048443	GO:0048610	GO:0048646	GO:0051179	GO:0060560	GO:0065008	GO:0097159	GO:0097305	GO:2000026
gi_351591582_gb_JP450028.1	GO:0000122	GO:0000977	GO:0001103	GO:0001568	GO:0003677	GO:0003678	GO:0003682	GO:0004386	GO:0005524	GO:0005634	GO:0005703	GO:0005705	GO:0005730	GO:0005737	GO:0005813	GO:0006333	GO:0007051	GO:0007399	GO:0007476	GO:0007507	GO:0007626	GO:0008026	GO:0009506	GO:0009755	GO:0009792	GO:0010646	GO:0016581	GO:0016740	GO:0023051	GO:0033993	GO:0035042	GO:0040007	GO:0040027	GO:0040035	GO:0042472	GO:0043010	GO:0043167	GO:0045111	GO:0048364	GO:0048477	GO:0048557	GO:0050877	GO:0051297	GO:0060173
gi_351591607_gb_JP450053.1	GO:0005509	GO:0005544	GO:0005635	GO:0005654	GO:0005819	GO:0005829	GO:0006694	GO:0006909	GO:0007109	GO:0007155	GO:0007599	GO:0008360	GO:0009408	GO:0009409	GO:0009414	GO:0009579	GO:0009639	GO:0009651	GO:0009827	GO:0009860	GO:0009897	GO:0010033	GO:0030048	GO:0030496	GO:0042581	GO:0042582	GO:0042981	GO:0044548	GO:0045335	GO:0046165	GO:0048046	GO:0048306	GO:0048519	GO:0050817	GO:0051592	GO:0072563
gi_351591627_gb_JP450073.1	GO:0000041	GO:0004784	GO:0005618	GO:0005634	GO:0005737	GO:0006005	GO:0009409	GO:0009505	GO:0009734	GO:0010103	GO:0016023	GO:0019684	GO:0019853	GO:0030003	GO:0030145	GO:0031012	GO:0031640	GO:0045735	GO:0048046	GO:0050162	GO:0050577	GO:0050829	GO:0050830	GO:0050832	GO:0055114	GO:0070838
gi_351591634_gb_JP450080.1	GO:0005730	GO:0007623	GO:0009611	GO:0009641	GO:0009658	GO:0009725	GO:0009805	GO:0009909	GO:0009963	GO:0010099	GO:0010223	GO:0033993	GO:0042802	GO:0045893	GO:0046872	GO:0048571	GO:0048572	GO:0048581	GO:0048585	GO:0051716	GO:0097305	GO:2000028
gi_351591658_gb_JP450104.1	GO:0006508	GO:0006869	GO:0008233	GO:0008289
gi_351591685_gb_JP450131.1	GO:0005886	GO:0006508	GO:0006869	GO:0008233	GO:0008289	GO:0031225	GO:0046658	GO:0071704
gi_351591688_gb_JP450134.1	GO:0004190	GO:0005975	GO:0006725	GO:0006952	GO:0008233	GO:0009507	GO:0009719	GO:0010019	GO:0010033	GO:0043231	GO:0043436	GO:0044444	GO:0050794	GO:0051707	GO:0051716
gi_351595629_gb_JP450195.1	GO:0002679	GO:0003677	GO:0003700	GO:0005634	GO:0005730	GO:0009409	GO:0009414	GO:0009738	GO:0009743	GO:0009753	GO:0009863	GO:0010105	GO:0010200	GO:0031347	GO:0033554	GO:0034059	GO:0035556	GO:0042538	GO:0042802	GO:0042991	GO:0043067	GO:0044281	GO:0045087	GO:0045892	GO:0048364	GO:0048825	GO:0051707	GO:1901137
gi_351595634_gb_JP450200.1	GO:0004091	GO:0005829	GO:0005886	GO:0009627	GO:0010033	GO:0010150	GO:0033310	GO:0033473	GO:0035560	GO:0042803	GO:0050794	GO:0051716	GO:0070988	GO:0080030	GO:0080032
gi_351595662_gb_JP450228.1	GO:0004497	GO:0004499	GO:0009626	GO:0009627	GO:0009870	GO:0010204	GO:0016020	GO:0042742	GO:0043231	GO:0044237	GO:0044281	GO:0044444	GO:0050660	GO:0050661	GO:0050832	GO:0055114	GO:0071456
gi_351595736_gb_JP450301.1	GO:0000287	GO:0008152	GO:0010333	GO:0033383	GO:0045338	GO:0047461
gi_351595740_gb_JP450305.1	GO:0002215	GO:0004601	GO:0005515	GO:0005618	GO:0005774	GO:0005794	GO:0005829	GO:0006979	GO:0009908	GO:0016023	GO:0020037	GO:0042744	GO:0046872	GO:0048046	GO:0055114	GO:0071456
gi_351595751_gb_JP450316.1	GO:0004842	GO:0005524	GO:0005654	GO:0005737	GO:0005829	GO:0005886	GO:0006301	GO:0006635	GO:0006944	GO:0009960	GO:0016558	GO:0016567	GO:0016579	GO:0031435	GO:0031625	GO:0034138	GO:0034142	GO:0035519	GO:0035666	GO:0039020	GO:0042023	GO:0043130	GO:0043161	GO:0043248	GO:0044314	GO:0048193	GO:0051049	GO:0051510	GO:0051788	GO:0061418	GO:0070534	GO:0070936	GO:0070979	GO:0085020
gi_351595770_gb_JP450335.1	GO:0000023	GO:0005509	GO:0006098	GO:0006364	GO:0009535	GO:0009543	GO:0009637	GO:0009654	GO:0009902	GO:0010027	GO:0010114	GO:0010218	GO:0015979	GO:0015995	GO:0019252	GO:0019898	GO:0042793
gi_351595777_gb_JP450342.1	GO:0005576	GO:0005783	GO:0005975	GO:0006342	GO:0007154	GO:0009505	GO:0009506	GO:0009887	GO:0009908	GO:0016570	GO:0031047	GO:0032880	GO:0042973	GO:0043414	GO:0046658	GO:0048646
gi_351595784_gb_JP450349.1	GO:0003825	GO:0004805	GO:0005634	GO:0005739	GO:0005829	GO:0005992	GO:0006007	GO:0007165	GO:0009267	GO:0009405	GO:0009507	GO:0009611	GO:0009744	GO:0009750	GO:0009753	GO:0009790	GO:0010035	GO:0010093	GO:0016099	GO:0034599	GO:0034605	GO:0034768	GO:0036168	GO:0036170	GO:0036180	GO:0048440	GO:0048507	GO:0050551	GO:0060257	GO:0071310	GO:0071470	GO:0071669	GO:0080027
gi_351595804_gb_JP450364.1	GO:0004252	GO:0008152	GO:0008236	GO:0009505	GO:0048046	GO:0048359	GO:0050789	GO:0080001
gi_351595822_gb_JP450382.1	GO:0003824	GO:0005488	GO:0009987	GO:0044464	GO:0045087
gi_351595865_gb_JP450425.1	GO:0000156	GO:0003677	GO:0003700	GO:0005488	GO:0005515	GO:0005634	GO:0006364	GO:0006417	GO:0007623	GO:0009651	GO:0009736	GO:0009737	GO:0009873	GO:0009902	GO:0009910	GO:0009944	GO:0009956	GO:0009965	GO:0010027	GO:0010029	GO:0010051	GO:0010082	GO:0010119	GO:0010150	GO:0010158	GO:0010207	GO:0010229	GO:0010380	GO:0010638	GO:0031537	GO:0035304	GO:0042793	GO:0045893	GO:0048481	GO:0080113
gi_351595866_gb_JP450426.1	GO:0000394	GO:0005768	GO:0005794	GO:0005802	GO:0006346	GO:0006486	GO:0008375	GO:0009086	GO:0009101	GO:0010584	GO:0016020	GO:0016021	GO:0030203	GO:0030244	GO:0031048	GO:0035250	GO:0044431	GO:0047220	GO:0048193	GO:0048531	GO:0048731	GO:0051567
gi_351595869_gb_JP450429.1	GO:0000413	GO:0003755	GO:0005515	GO:0005528	GO:0005576	GO:0005783	GO:0006457	GO:0009535	GO:0009543	GO:0010598	GO:0031679
gi_351595944_gb_JP450504.1	GO:0003857	GO:0004303	GO:0005507	GO:0005515	GO:0005759	GO:0005829	GO:0005886	GO:0006561	GO:0006703	GO:0009408	GO:0009414	GO:0009750	GO:0010115	GO:0010182	GO:0010301	GO:0042742	GO:0047044	GO:0051504
gi_351595945_gb_JP450505.1	GO:0000272	GO:0002679	GO:0003735	GO:0004674	GO:0005524	GO:0005774	GO:0005886	GO:0005982	GO:0006084	GO:0006412	GO:0006468	GO:0006888	GO:0007020	GO:0007169	GO:0007389	GO:0008361	GO:0009505	GO:0009506	GO:0009610	GO:0009737	GO:0009832	GO:0009860	GO:0009926	GO:0010075	GO:0010200	GO:0016021	GO:0016126	GO:0016132	GO:0022625	GO:0042545	GO:0043090	GO:0045177	GO:0046658	GO:0048767	GO:0050321	GO:0052541	GO:0052546	GO:2000605
gi_351595987_gb_JP450546.1	GO:0005622
gi_351596023_gb_JP450582.1	GO:0006098	GO:0009055	GO:0009535	GO:0009773	GO:0010598	GO:0019252	GO:0019288	GO:0019761	GO:0030003	GO:0046872	GO:0051536	GO:0070838
gi_351596038_gb_JP450597.1	GO:0000184	GO:0004386	GO:0005737	GO:0006281	GO:0006351	GO:0009553	GO:0009875	GO:0010183	GO:0010468	GO:0030529	GO:0031981	GO:0043232	GO:0044267	GO:0044424	GO:0048451	GO:0048453	GO:0080090	GO:0097159	GO:2000112
gi_351596061_gb_JP450620.1	GO:0005739	GO:0006952	GO:0006970	GO:0008152	GO:0008265	GO:0009507	GO:0009755	GO:0016491	GO:0030151	GO:0030170	GO:0031966	GO:0043167	GO:0043436	GO:0043545	GO:0048037	GO:0051707
gi_351596065_gb_JP450623.1	GO:0000911	GO:0003678	GO:0005488	GO:0005524	GO:0005634	GO:0006259	GO:0006302	GO:0006312	GO:0006397	GO:0006974	GO:0007062	GO:0007067	GO:0007131	GO:0007275	GO:0008026	GO:0008380	GO:0010564	GO:0022414	GO:0030529	GO:0042138	GO:0044428	GO:0045132	GO:0048856	GO:0050794	GO:0051026
gi_351596082_gb_JP450640.1	GO:0003676
gi_351596102_gb_JP450660.1	GO:0000166	GO:0005576	GO:0008202	GO:0009737	GO:0009741	GO:0016114	GO:0043231	GO:0044444	GO:0055114	GO:0070524	GO:0072555	GO:0072582
gi_351596125_gb_JP450683.1	GO:0004151	GO:0005739	GO:0009507	GO:0019856	GO:0044205	GO:0046872
gi_351596138_gb_JP450696.1	GO:0003712	GO:0005516	GO:0005634	GO:0005737	GO:0005739	GO:0005886	GO:0006366	GO:0006826	GO:0008127	GO:0009536	GO:0009737	GO:0009738	GO:0009785	GO:0010106	GO:0010167	GO:0010244	GO:0015706	GO:0030224	GO:0046872	GO:0048446	GO:0055114
gi_351596164_gb_JP450722.1	GO:0005783	GO:0009411	GO:0009733	GO:0009813	GO:0016036	GO:0016099	GO:0016102	GO:0016491	GO:0016711	GO:0019375	GO:0019825	GO:0031090	GO:0036202	GO:0042631	GO:0044425	GO:0046872	GO:0055114
gi_351596170_gb_JP450728.1	GO:0000271	GO:0004674	GO:0004713	GO:0005515	GO:0005524	GO:0005886	GO:0006073	GO:0006468	GO:0006950	GO:0006955	GO:0006996	GO:0007169	GO:0007389	GO:0008544	GO:0009733	GO:0009741	GO:0009790	GO:0009886	GO:0010016	GO:0016021	GO:0034645	GO:0038023	GO:0043231	GO:0044444	GO:0048443	GO:0048507	GO:0048589	GO:0048869	GO:2000026
gi_351596175_gb_JP450733.1	GO:0004553	GO:0005975
gi_351596208_gb_JP450766.1	GO:0002679	GO:0005388	GO:0005516	GO:0005524	GO:0005789	GO:0005794	GO:0006612	GO:0006754	GO:0006816	GO:0006862	GO:0006882	GO:0006888	GO:0006944	GO:0009506	GO:0009535	GO:0009624	GO:0009627	GO:0009651	GO:0009697	GO:0009705	GO:0009723	GO:0009963	GO:0010037	GO:0010200	GO:0010363	GO:0015696	GO:0015802	GO:0016021	GO:0030968	GO:0034220	GO:0042742	GO:0042995	GO:0043069	GO:0043090	GO:0043269	GO:0043621	GO:0044459	GO:0046872	GO:0048513	GO:0050832	GO:0055081	GO:0070588
gi_351596259_gb_JP450816.1	GO:0004356	GO:0005524	GO:0005739	GO:0006096	GO:0006098	GO:0006542	GO:0006833	GO:0006972	GO:0007030	GO:0007568	GO:0009399	GO:0009409	GO:0009535	GO:0009570	GO:0009637	GO:0009644	GO:0009651	GO:0009744	GO:0009749	GO:0009750	GO:0009941	GO:0010114	GO:0010155	GO:0010218	GO:0019344	GO:0019676	GO:0022626	GO:0046686	GO:0048046
gi_351596272_gb_JP450829.1	GO:0000049	GO:0000287	GO:0005524	GO:0005525	GO:0005737	GO:0005739	GO:0006400	GO:0008033	GO:0008193	GO:0022008	GO:0042802	GO:0051289
gi_351596292_gb_JP450849.1	GO:0000373	GO:0003723	GO:0008380	GO:0009507	GO:0044249
gi_351596331_gb_JP450888.1	GO:0005634	GO:0016126	GO:0019745	GO:0042299	GO:0042300	GO:0042335	GO:0042561	GO:0090438
gi_351596341_gb_JP450898.1	GO:0005488	GO:0006952
gi_351596344_gb_JP450901.1	GO:0005515	GO:0005524	GO:0005634	GO:0005773	GO:0005886	GO:0006200	GO:0006754	GO:0006812	GO:0008553	GO:0009414	GO:0009737	GO:0010119	GO:0015992	GO:0016021	GO:0046872
gi_351596445_gb_JP451001.1	GO:0000271	GO:0000272	GO:0002764	GO:0005515	GO:0005886	GO:0005982	GO:0006468	GO:0006725	GO:0006996	GO:0007389	GO:0008544	GO:0009507	GO:0009626	GO:0009628	GO:0009755	GO:0009790	GO:0009886	GO:0009933	GO:0010015	GO:0010073	GO:0010204	GO:0010359	GO:0010468	GO:0016045	GO:0016049	GO:0016301	GO:0019199	GO:0030154	GO:0034645	GO:0048509	GO:0048589	GO:0048653	GO:0065008	GO:0070727	GO:0071407	GO:0071555
gi_351596474_gb_JP451030.1	GO:0005488	GO:0005739	GO:0006952	GO:0010193	GO:0044446
gi_351596487_gb_JP451043.1	GO:0000165	GO:0003700	GO:0005524	GO:0005618	GO:0005634	GO:0006612	GO:0007165	GO:0009409	GO:0009526	GO:0009535	GO:0009570	GO:0009579	GO:0009595	GO:0009637	GO:0009639	GO:0009644	GO:0009697	GO:0009719	GO:0009744	GO:0009814	GO:0009862	GO:0009867	GO:0009941	GO:0010114	GO:0010150	GO:0010155	GO:0010200	GO:0010218	GO:0010287	GO:0010310	GO:0010319	GO:0010363	GO:0016020	GO:0019222	GO:0019684	GO:0030234	GO:0031347	GO:0031348	GO:0042742	GO:0043531	GO:0043900	GO:0044237	GO:0046863	GO:0048046	GO:0050790	GO:0050832	GO:0071310
gi_351596516_gb_JP451072.1	GO:0005488
gi_351596529_gb_JP451085.1	GO:0005739	GO:0005783	GO:0005795	GO:0006778	GO:0006811	GO:0008202	GO:0008219	GO:0008283	GO:0009651	GO:0009737	GO:0014070	GO:0016020	GO:0019222	GO:0020037	GO:0042063	GO:0043231	GO:0044444	GO:0048468	GO:0048519	GO:0048522	GO:0048699	GO:0051239	GO:0051716
gi_351596543_gb_JP451099.1	GO:0005515	GO:0006952	GO:0044464
gi_351596544_gb_JP451100.1	GO:0005488
gi_351596559_gb_JP451115.1	GO:0004176	GO:0004222	GO:0005524	GO:0005739	GO:0005886	GO:0006098	GO:0006200	GO:0006364	GO:0006457	GO:0006508	GO:0008270	GO:0008568	GO:0009408	GO:0009507	GO:0009523	GO:0009535	GO:0009644	GO:0009902	GO:0009941	GO:0010027	GO:0010205	GO:0010206	GO:0010207	GO:0010304	GO:0016021	GO:0031977	GO:0035304	GO:0042542	GO:0042744	GO:0042793	GO:0042981	GO:0045893	GO:0051301
gi_351596616_gb_JP451172.1	GO:0005215	GO:0005794	GO:0005886	GO:0006807	GO:0006812	GO:0006857	GO:0009506	GO:0009611	GO:0009624	GO:0009705	GO:0009737	GO:0009751	GO:0009753	GO:0009860	GO:0015112	GO:0015334	GO:0016021	GO:0033036	GO:0042538	GO:0042742	GO:0042936	GO:0042937	GO:0042938	GO:0042939	GO:0043201	GO:0046907	GO:0080052	GO:0080053
gi_351596633_gb_JP451189.1	GO:0003676	GO:0005515	GO:0005694	GO:0006357	GO:0006464	GO:0006796	GO:0006950	GO:0007049	GO:0008270	GO:0009628	GO:0009791	GO:0010557	GO:0016568	GO:0016740	GO:0016787	GO:0022414	GO:0031328	GO:0043167	GO:0043234	GO:0044444	GO:0044451	GO:0048583	GO:0048731	GO:0051254	GO:0051704	GO:0051716	GO:0065008
gi_351596636_gb_JP451192.1	GO:0005576	GO:0005886	GO:0005975	GO:0006826	GO:0006879	GO:0009845	GO:0009855	GO:0009944	GO:0010014	GO:0010075	GO:0010106	GO:0010167	GO:0010413	GO:0015137	GO:0015706	GO:0016023	GO:0016036	GO:0016985	GO:0019375	GO:0045492	GO:0045892	GO:0071281	GO:0071369	GO:0071732	GO:0071944
gi_351596667_gb_JP451222.1	GO:0004091	GO:0005576	GO:0006629	GO:0010015	GO:0010817	GO:0016049	GO:0044237	GO:0044238	GO:0048046	GO:0048869	GO:0060560	GO:0071555	GO:0071669
gi_351596669_gb_JP451224.1	GO:0006364	GO:0006399	GO:0008865	GO:0009220	GO:0009506	GO:0009658	GO:0009662	GO:0009743	GO:0016310	GO:0016772	GO:0042644	GO:0042793	GO:0043231	GO:0044444	GO:0045036	GO:0045893
gi_351596671_gb_JP451226.1	GO:0004857	GO:0016787	GO:0030599	GO:0043086
gi_351596692_gb_JP451247.1	GO:0030246
gi_351596696_gb_JP451251.1	GO:0000148	GO:0003843	GO:0005794	GO:0006075	GO:0006612	GO:0006862	GO:0006888	GO:0006944	GO:0007623	GO:0009506	GO:0009556	GO:0009827	GO:0009846	GO:0009863	GO:0009870	GO:0009965	GO:0010150	GO:0010363	GO:0010584	GO:0015696	GO:0015802	GO:0042742	GO:0043069	GO:0043090	GO:0043269	GO:0050832	GO:0052543	GO:0052544	GO:0080092
gi_351596723_gb_JP451278.1	GO:0005488	GO:0008757	GO:0044237	GO:0044238	GO:0071704
gi_351596788_gb_JP451342.1	GO:0005773	GO:0005886	GO:0006812	GO:0006855	GO:0006863	GO:0009624	GO:0009705	GO:0010023	GO:0010231	GO:0015238	GO:0015297	GO:0015299
gi_351596822_gb_JP451376.1	GO:0008661	GO:0009228	GO:0009570	GO:0015995	GO:0016114	GO:0046872	GO:0052865
gi_351596872_gb_JP451425.1	GO:0004124	GO:0005634	GO:0005739	GO:0005777	GO:0005886	GO:0006535	GO:0009509	GO:0009570	GO:0009836	GO:0010043	GO:0019499	GO:0046686	GO:0047458	GO:0048046	GO:0050017	GO:0050234	GO:0050461
gi_351596878_gb_JP451431.1	GO:0000209	GO:0005515	GO:0005634	GO:0005737	GO:0006635	GO:0009755	GO:0016558	GO:0019787	GO:0032502	GO:0046872
gi_351596928_gb_JP451481.1	GO:0005488
gi_351596930_gb_JP451483.1	GO:0000041	GO:0004601	GO:0005515	GO:0005576	GO:0005634	GO:0005773	GO:0005829	GO:0006598	GO:0006694	GO:0006979	GO:0009269	GO:0009409	GO:0009505	GO:0009506	GO:0009698	GO:0010054	GO:0010075	GO:0010167	GO:0010413	GO:0015706	GO:0016020	GO:0020037	GO:0042398	GO:0042538	GO:0045492	GO:0046165	GO:0046872	GO:0048653	GO:0055114	GO:0071456
gi_351596945_gb_JP451498.1	GO:0004338	GO:0004565	GO:0005618	GO:0005739	GO:0005794	GO:0005829	GO:0006816	GO:0007030	GO:0008152	GO:0009505	GO:0009506	GO:0009507	GO:0009651	GO:0010359	GO:0016023	GO:0016052	GO:0033907	GO:0042973	GO:0043169	GO:0047701	GO:0048046	GO:0051707	GO:0080079	GO:0080083
gi_351596970_gb_JP451523.1	GO:0004338	GO:0004565	GO:0004567	GO:0005975	GO:0008270	GO:0008422	GO:0009505	GO:0009507	GO:0009809	GO:0016023	GO:0022626	GO:0033907	GO:0042803	GO:0042973	GO:0047668	GO:0047701	GO:0047782	GO:0048046	GO:0050224	GO:0080079	GO:0080081	GO:0080082	GO:0080083
gi_351596998_gb_JP451550.1	GO:0004056	GO:0004365	GO:0005515	GO:0005829	GO:0006096	GO:0006364	GO:0009409	GO:0009535	GO:0009570	GO:0009637	GO:0009644	GO:0009657	GO:0009744	GO:0009749	GO:0009773	GO:0009941	GO:0010103	GO:0010114	GO:0010155	GO:0010207	GO:0010218	GO:0010319	GO:0016020	GO:0019253	GO:0035304	GO:0042742	GO:0043891	GO:0047100	GO:0048046	GO:0050661	GO:0051287	GO:0055114
gi_351597028_gb_JP451580.1	GO:0005634	GO:0006979	GO:0009409	GO:0009414	GO:0009611	GO:0009644	GO:0009651	GO:0009723	GO:0009737	GO:0009755	GO:0009791	GO:0010117	GO:0010200	GO:0015979	GO:0035264	GO:0043565	GO:0045892	GO:0048608	GO:0055062	GO:2000280
gi_351597066_gb_JP451618.1	GO:0000041	GO:0000166	GO:0002237	GO:0004672	GO:0004674	GO:0005515	GO:0005524	GO:0005886	GO:0005982	GO:0006464	GO:0006468	GO:0006952	GO:0006955	GO:0007389	GO:0009507	GO:0009628	GO:0009755	GO:0009933	GO:0010073	GO:0010103	GO:0010359	GO:0010431	GO:0016021	GO:0016043	GO:0016049	GO:0016310	GO:0030154	GO:0032440	GO:0034645	GO:0038023	GO:0048508	GO:0048509	GO:0048518	GO:0048580	GO:0048589	GO:0048653	GO:0055114	GO:0065008	GO:0071554
gi_351597076_gb_JP451628.1	GO:0006364	GO:0009517	GO:0009533	GO:0009637	GO:0009644	GO:0009744	GO:0009765	GO:0009783	GO:0010114	GO:0010155	GO:0010196	GO:0010218	GO:0010287	GO:0015979	GO:0016168	GO:0019344	GO:0046872
gi_351597080_gb_JP451632.1	GO:0005576	GO:0005618	GO:0006598	GO:0009507	GO:0009627	GO:0009807	GO:0030048	GO:0034976	GO:0042398
gi_351597084_gb_JP451636.1	GO:0005886	GO:0009791	GO:0031225	GO:0044237	GO:0044238	GO:0046872	GO:0048608	GO:0050896
gi_351597092_gb_JP451644.1	GO:0004601	GO:0005515	GO:0005618	GO:0005794	GO:0005829	GO:0006979	GO:0009809	GO:0016023	GO:0020037	GO:0046872	GO:0048046	GO:0055114	GO:0071456
gi_351597124_gb_JP451674.1	GO:0016043	GO:0016049	GO:0048869	GO:0060560	GO:0065007
gi_351597130_gb_JP451680.1	GO:0001578	GO:0005488	GO:0006826	GO:0006950	GO:0009647	GO:0009687	GO:0010106	GO:0010167	GO:0010268	GO:0015706	GO:0016020	GO:0016049	GO:0016132	GO:0016491	GO:0016709	GO:0031410	GO:0032989	GO:0043231	GO:0048443	GO:0060560
gi_351597133_gb_JP451683.1	GO:0004144	GO:0005783	GO:0010025	GO:0047196	GO:0048481
gi_351597142_gb_JP451692.1	GO:0003006	GO:0004672	GO:0005488	GO:0005975	GO:0006464	GO:0006810	GO:0006952	GO:0006955	GO:0007165	GO:0009617	GO:0009725	GO:0009886	GO:0009888	GO:0016020	GO:0016043	GO:0016310	GO:0038023	GO:0043231	GO:0044444	GO:0048569
gi_351597144_gb_JP451694.1	GO:0000165	GO:0001666	GO:0003700	GO:0005634	GO:0005992	GO:0006561	GO:0006612	GO:0008361	GO:0009409	GO:0009414	GO:0009416	GO:0009507	GO:0009611	GO:0009617	GO:0009695	GO:0009718	GO:0009723	GO:0009733	GO:0009738	GO:0009744	GO:0009814	GO:0009825	GO:0009862	GO:0009867	GO:0009965	GO:0010072	GO:0010093	GO:0010120	GO:0010160	GO:0010200	GO:0010223	GO:0010286	GO:0010363	GO:0030968	GO:0031348	GO:0042538	GO:0043069	GO:0043424	GO:0045792	GO:0045893	GO:0046982	GO:0048281	GO:0048440	GO:0048527	GO:0050832	GO:0051782	GO:1900056
gi_351597145_gb_JP451695.1	GO:0005515	GO:0005975	GO:0006970	GO:0009414	GO:0009605	GO:0009733	GO:0009741	GO:0010015	GO:0010467	GO:0010468	GO:0010583	GO:0016043	GO:0016049	GO:0016791	GO:0030154	GO:0034645	GO:0043231	GO:0044238	GO:0044444	GO:0046686	GO:0048527	GO:0050794	GO:0065008	GO:0080090	GO:2000112
gi_351597152_gb_JP451702.1	GO:0005198	GO:0009522	GO:0009523	GO:0009535	GO:0009639	GO:0009765	GO:0016021	GO:0016168	GO:0018298	GO:0046872
gi_351597173_gb_JP451723.1	GO:0005337	GO:0005774	GO:0005886	GO:0006863	GO:0015864	GO:0016021
gi_351597197_gb_JP451747.1	GO:0001666	GO:0002679	GO:0004564	GO:0005576	GO:0005618	GO:0005773	GO:0005886	GO:0005975	GO:0006865	GO:0009611	GO:0009862	GO:0010167	GO:0010200	GO:0010310	GO:0015706	GO:0016023	GO:0031219	GO:0051670	GO:0080167
gi_351597199_gb_JP451749.1	GO:0000123	GO:0005515	GO:0010485	GO:0015630	GO:0016477	GO:0035097	GO:0043967	GO:0044430	GO:0044444	GO:0048731	GO:0050794
gi_351597218_gb_JP451768.1	GO:0005515	GO:0005886	GO:0009506	GO:0010286	GO:0030001	GO:0046872
gi_351597227_gb_JP451777.1	GO:0004430	GO:0005546	GO:0005634	GO:0005798	GO:0005829	GO:0005886	GO:0006468	GO:0006661	GO:0007165	GO:0007268	GO:0009506	GO:0009507	GO:0009860	GO:0012505	GO:0017137	GO:0030659	GO:0032266	GO:0035004	GO:0035091	GO:0035619	GO:0043325	GO:0043424	GO:0044281	GO:0046854	GO:0048015	GO:0048471	GO:0048768	GO:0051015	GO:0070273	GO:0070300
gi_351597236_gb_JP451786.1	GO:0001653	GO:0002237	GO:0004383	GO:0004674	GO:0005515	GO:0005524	GO:0005576	GO:0005886	GO:0006468	GO:0006811	GO:0007169	GO:0009506	GO:0009611	GO:0009723	GO:0009738	GO:0009753	GO:0009790	GO:0009873	GO:0010103	GO:0010200	GO:0016043	GO:0019199	GO:0034645	GO:0035556	GO:0042277	GO:0042742	GO:0043231	GO:0044444	GO:0045087	GO:0048443	GO:0048507	GO:0052542
gi_351597300_gb_JP451848.1	GO:0000165	GO:0004435	GO:0004629	GO:0004871	GO:0005488	GO:0005509	GO:0005737	GO:0005886	GO:0006355	GO:0006612	GO:0006629	GO:0009269	GO:0009409	GO:0009617	GO:0009651	GO:0009738	GO:0009862	GO:0009867	GO:0010310	GO:0010363	GO:0030048	GO:0031348	GO:0035304	GO:0035556	GO:0043069	GO:0043231	GO:0051645	GO:0051646	GO:0060151
gi_351597319_gb_JP451867.1	GO:0002376	GO:0004674	GO:0005634	GO:0005773	GO:0005886	GO:0006952	GO:0007154	GO:0009506	GO:0010033	GO:0016044	GO:0016301	GO:0031625	GO:0043067	GO:0046777	GO:0051704	GO:0051716
gi_351597320_gb_JP451868.1	GO:0000165	GO:0000166	GO:0000302	GO:0004674	GO:0005516	GO:0005886	GO:0006468	GO:0006811	GO:0006952	GO:0010035	GO:0010150	GO:0043231	GO:0046777	GO:0051707
gi_351597332_gb_JP451880.1	GO:0003677	GO:0003678	GO:0003824	GO:0005576	GO:0005634	GO:0006346	GO:0008283	GO:0009733	GO:0009736	GO:0009739	GO:0009788	GO:0009821	GO:0010264	GO:0016020	GO:0016246	GO:0016844	GO:0016887	GO:0044464	GO:2000023
gi_351597374_gb_JP451921.1	GO:0005773
gi_351597378_gb_JP451925.1	GO:0000278	GO:0003677	GO:0003700	GO:0005634	GO:0006355	GO:0006396	GO:0006790	GO:0007062	GO:0007131	GO:0009150	GO:0009555	GO:0010332	GO:0010413	GO:0010500	GO:0032204	GO:0042138	GO:0043247	GO:0045132	GO:0045492	GO:0047627	GO:0048462	GO:0080126	GO:0080147
gi_351597406_gb_JP451952.1	GO:0003676	GO:0004970	GO:0005234	GO:0006811	GO:0008270	GO:0015074	GO:0016021	GO:0016787	GO:0035235
gi_351597414_gb_JP451960.1	GO:0005634	GO:0005829	GO:0007275	GO:0007600	GO:0009860	GO:0010183	GO:0010605	GO:0016055	GO:0016209	GO:0016668	GO:0016853	GO:0031324	GO:0044249	GO:0044260	GO:0045454	GO:0046686	GO:0047134	GO:0055114	GO:0080090	GO:0080092
gi_351597434_gb_JP451980.1	GO:0004857	GO:0005634	GO:0005768	GO:0005774	GO:0005794	GO:0005802	GO:0005886	GO:0006612	GO:0006833	GO:0009505	GO:0009506	GO:0009651	GO:0009750	GO:0009963	GO:0010363	GO:0015824	GO:0030599	GO:0042545	GO:0042744	GO:0043086	GO:0045330	GO:0045490
gi_351597435_gb_JP451981.1	GO:0005737	GO:0005829	GO:0006457	GO:0006972	GO:0009408	GO:0009644	GO:0010286	GO:0034976	GO:0042542	GO:0045471	GO:0046685	GO:0046686	GO:0046688	GO:0051082
gi_351597439_gb_JP451985.1	GO:0005509	GO:0009535	GO:0009543	GO:0009570	GO:0009654	GO:0009853	GO:0015979	GO:0019684	GO:0019898	GO:0030003	GO:0030095	GO:0031977	GO:0048046	GO:0055114	GO:0070838
gi_351597440_gb_JP451986.1	GO:0005634
gi_351597475_gb_JP452020.1	GO:0004553	GO:0005737	GO:0005886	GO:0005986	GO:0006979	GO:0009414	GO:0009506	GO:0009507	GO:0009737	GO:0010325	GO:0016301	GO:0019593	GO:0034484	GO:0047274	GO:0052692	GO:0080167
gi_351597483_gb_JP452028.1	GO:0000186	GO:0004674	GO:0004709	GO:0005524	GO:0005886	GO:0006811	GO:0007154	GO:0009506	GO:0009507	GO:0009605	GO:0009653	GO:0009751	GO:0009888	GO:0012501	GO:0016043	GO:0031625	GO:0042742	GO:0046777	GO:0048437	GO:0048589	GO:0048610	GO:0048869	GO:0050789	GO:0051716	GO:0071705
gi_351597485_gb_JP452030.1	GO:0005515	GO:0009579	GO:0016127	GO:0016740	GO:0034434	GO:0043231	GO:0044444
gi_351597495_gb_JP452040.1	GO:0000038	GO:0004091	GO:0005615	GO:0005618	GO:0005634	GO:0006629	GO:0006833	GO:0009507	GO:0009534	GO:0009750	GO:0009751	GO:0010103	GO:0010226	GO:0016788	GO:0042335	GO:0042538	GO:0042631	GO:0045893	GO:0048046	GO:0050525	GO:0090406
gi_351597499_gb_JP452044.1	GO:0005515	GO:0005634
gi_351597510_gb_JP452055.1	GO:0000902	GO:0005618	GO:0005768	GO:0005794	GO:0005802	GO:0005886	GO:0006096	GO:0006816	GO:0006833	GO:0006970	GO:0007030	GO:0008270	GO:0009266	GO:0009414	GO:0009507	GO:0009750	GO:0009825	GO:0009833	GO:0009834	GO:0009863	GO:0009867	GO:0009873	GO:0010089	GO:0010116	GO:0010228	GO:0010400	GO:0010413	GO:0016021	GO:0016760	GO:0016761	GO:0016926	GO:0030244	GO:0042538	GO:0042742	GO:0045492	GO:0046686	GO:0048193	GO:0048767	GO:0050665	GO:0050832	GO:0052386
gi_351597513_gb_JP452058.1	GO:0000910	GO:0002213	GO:0004568	GO:0005515	GO:0005576	GO:0005929	GO:0006006	GO:0006032	GO:0009653	GO:0009913	GO:0016620	GO:0022607	GO:0030036	GO:0040007	GO:0044237	GO:0044444	GO:0048364	GO:0048468	GO:0050794
gi_351597520_gb_JP452065.1	GO:0009408	GO:0019538	GO:0044237	GO:0044424	GO:0051716
gi_351597536_gb_JP452081.1	GO:0005783	GO:0005789	GO:0006636	GO:0009409	GO:0016021	GO:0016717	GO:0031969	GO:0042389	GO:0055114	GO:0080167
gi_351597547_gb_JP452092.1	GO:0001666	GO:0002682	GO:0003840	GO:0004021	GO:0005488	GO:0005634	GO:0005773	GO:0005777	GO:0005829	GO:0006691	GO:0006750	GO:0006751	GO:0006805	GO:0006833	GO:0007283	GO:0008453	GO:0009505	GO:0009506	GO:0009570	GO:0009625	GO:0009651	GO:0009750	GO:0009853	GO:0009862	GO:0010264	GO:0016021	GO:0016756	GO:0019344	GO:0031226	GO:0031348	GO:0034775	GO:0042744	GO:0044242	GO:0047958	GO:0048046	GO:0050727
gi_351597554_gb_JP452099.1	GO:0004190	GO:0005576	GO:0006508	GO:0006952	GO:0009628	GO:0009696	GO:0009725	GO:0010035	GO:0016020	GO:0019538	GO:0031323	GO:0043231	GO:0044444	GO:0051707	GO:0051716	GO:0070001
gi_351597555_gb_JP452100.1	GO:0006725	GO:0008194	GO:0009411	GO:0009751	GO:0009813	GO:0009850	GO:0009873	GO:0010035	GO:0016758	GO:0019748	GO:0019752	GO:0033554	GO:0035251	GO:0043231	GO:0044444	GO:0048367	GO:0071214
gi_351597561_gb_JP452106.1	GO:0005768	GO:0005794	GO:0005802
gi_351597572_gb_JP452115.1	GO:0005730
gi_351597593_gb_JP452136.1	GO:0003824	GO:0004252	GO:0005618	GO:0005634	GO:0006457	GO:0006508	GO:0009644	GO:0010286	GO:0010608	GO:0019295	GO:0042542	GO:0042802	GO:0043086	GO:0043817
gi_351597611_gb_JP452154.1	GO:0005634	GO:0005737	GO:0019005	GO:0080037
gi_351597633_gb_JP452175.1	GO:0043069	GO:0050896
gi_351597655_gb_JP452197.1	GO:0002215	GO:0002679	GO:0004601	GO:0005576	GO:0005634	GO:0005774	GO:0005783	GO:0005794	GO:0006612	GO:0006826	GO:0009269	GO:0009409	GO:0009505	GO:0009506	GO:0009808	GO:0009863	GO:0009908	GO:0010054	GO:0010106	GO:0010167	GO:0010200	GO:0010363	GO:0010413	GO:0015706	GO:0016023	GO:0016132	GO:0020037	GO:0042538	GO:0042744	GO:0043069	GO:0045492	GO:0046872	GO:0048046	GO:0050832	GO:0055114	GO:0071456
gi_351597658_gb_JP452200.1	GO:0005829	GO:0005886	GO:0006631	GO:0006952	GO:0008106	GO:0009505	GO:0009744	GO:0009813	GO:0010224	GO:0031525	GO:0042214	GO:0042375	GO:0043231	GO:0047501	GO:0047504	GO:0052581	GO:0055114	GO:0070402	GO:0080167
gi_351597668_gb_JP452210.1	GO:0005737	GO:0005886	GO:0006612	GO:0006857	GO:0006862	GO:0006888	GO:0006944	GO:0010363	GO:0015198	GO:0015696	GO:0015802	GO:0043069	GO:0043090	GO:0043269	GO:0048235	GO:0055085	GO:0080167
gi_351597687_gb_JP452228.1	GO:0004056	GO:0004365	GO:0005829	GO:0006096	GO:0006098	GO:0006364	GO:0006636	GO:0009409	GO:0009522	GO:0009535	GO:0009570	GO:0009637	GO:0009644	GO:0009657	GO:0009744	GO:0009749	GO:0009773	GO:0009902	GO:0009941	GO:0010103	GO:0010114	GO:0010155	GO:0010207	GO:0010218	GO:0010304	GO:0010319	GO:0015995	GO:0016020	GO:0016021	GO:0019216	GO:0019253	GO:0019288	GO:0019344	GO:0031408	GO:0035304	GO:0042742	GO:0042744	GO:0043891	GO:0046686	GO:0047100	GO:0048046	GO:0050661	GO:0051287
gi_351597716_gb_JP452257.1	GO:0005515	GO:0005634	GO:0009615	GO:0010585	GO:0016021	GO:0019048	GO:0080143
gi_351597746_gb_JP452287.1	GO:0006807	GO:0008374	GO:0009699	GO:0016043	GO:0016410	GO:0016747	GO:0044238	GO:0050734	GO:0065007
gi_351597772_gb_JP452312.1	GO:0005215	GO:0005347	GO:0005743	GO:0006612	GO:0006839	GO:0006865	GO:0006888	GO:0006944	GO:0009165	GO:0009507	GO:0009706	GO:0009793	GO:0010117	GO:0010206	GO:0010363	GO:0015217	GO:0015228	GO:0015696	GO:0015802	GO:0015866	GO:0015867	GO:0016021	GO:0016044	GO:0031967	GO:0033098	GO:0035349	GO:0042651	GO:0043067	GO:0043069	GO:0043090	GO:0043262	GO:0043269	GO:0046907	GO:0055085	GO:0080121	GO:0080122
gi_351597823_gb_JP452361.1	GO:0003677	GO:0003887	GO:0005737	GO:0006260
gi_351597826_gb_JP452364.1	GO:0003333	GO:0005887	GO:0006612	GO:0006833	GO:0009624	GO:0009651	GO:0009750	GO:0009963	GO:0010363	GO:0015171	GO:0015172	GO:0015174	GO:0015175	GO:0015399	GO:0015804	GO:0015809	GO:0015810	GO:0015827	GO:0016021	GO:0030003	GO:0043090	GO:0070838
gi_351597830_gb_JP452368.1	GO:0005515	GO:0005576	GO:0005737	GO:0005739	GO:0005886	GO:0005938	GO:0006896	GO:0009628	GO:0009705	GO:0009734	GO:0009826	GO:0009834	GO:0009888	GO:0010015	GO:0016020	GO:0016556	GO:0019761	GO:0032973	GO:0034639	GO:0043090	GO:0051453	GO:0080144	GO:0080171	GO:0090355	GO:0090358
gi_351597832_gb_JP452370.1	GO:0004650	GO:0005515	GO:0005576	GO:0005975	GO:0009505	GO:0009901	GO:0010047	GO:0016043	GO:0031225	GO:0047911
gi_351597845_gb_JP452383.1	GO:0005774	GO:0005886	GO:0006865	GO:0009826	GO:0010033	GO:0010817	GO:0015171	GO:0019752	GO:0031325	GO:0044238	GO:0048513	GO:0050801	GO:0071554
gi_351597939_gb_JP452474.1	GO:0004497	GO:0005488	GO:0009411	GO:0009733	GO:0009813	GO:0016020	GO:0016705	GO:0016711	GO:0043231	GO:0044444	GO:0046246	GO:0046872	GO:0071281	GO:0097007	GO:0097008
gi_351597986_gb_JP452520.1	GO:0005515	GO:0005769	GO:0005794	GO:0005929	GO:0010413	GO:0016020	GO:0016023	GO:0016311	GO:0030030	GO:0030258	GO:0032319	GO:0044446	GO:0045492	GO:0046488	GO:0048856	GO:0051179	GO:0052745
gi_351597997_gb_JP452531.1	GO:0005634	GO:0005783	GO:0006807	GO:0008374	GO:0009699	GO:0009813	GO:0010025	GO:0016043	GO:0016410	GO:0042761	GO:0044238	GO:0050734
gi_351598026_gb_JP452560.1	GO:0005515	GO:0009627	GO:0009697	GO:0044464
gi_351598087_gb_JP452620.1	GO:0000038	GO:0000271	GO:0003841	GO:0005739	GO:0005783	GO:0006655	GO:0007389	GO:0008361	GO:0009825	GO:0009908	GO:0009926	GO:0009932	GO:0010075	GO:0010143	GO:0010345	GO:0016020	GO:0016791	GO:0042335	GO:0043481	GO:0048235	GO:0048767	GO:0071555	GO:0080167	GO:0090447
gi_351598090_gb_JP452623.1	GO:0005254	GO:0005507	GO:0005635	GO:0005739	GO:0005773	GO:0005777	GO:0005829	GO:0005886	GO:0008022	GO:0009407	GO:0009570	GO:0009610	GO:0009753	GO:0009941	GO:0010027	GO:0010043	GO:0010193	GO:0010583	GO:0010731	GO:0010880	GO:0015630	GO:0016740	GO:0030855	GO:0031749	GO:0031750	GO:0031751	GO:0034765	GO:0042803	GO:0042995	GO:0043295	GO:0043903	GO:0045174	GO:0048046	GO:0048513	GO:0055114	GO:0065009	GO:0070887
gi_351598104_gb_JP452637.1	GO:0000325	GO:0005524	GO:0005634	GO:0005774	GO:0005794	GO:0005887	GO:0006200	GO:0006725	GO:0006766	GO:0006855	GO:0006979	GO:0008514	GO:0009408	GO:0009506	GO:0010290	GO:0015431	GO:0015732	GO:0016021	GO:0016324	GO:0019904	GO:0030644	GO:0031427	GO:0032440	GO:0032787	GO:0042626	GO:0043627	GO:0044238	GO:0046483	GO:0046685	GO:0048046	GO:0051707	GO:0055085	GO:0055114	GO:0070327
gi_351598170_gb_JP452702.1	GO:0005829	GO:0005886	GO:0030048	GO:0051645	GO:0051646	GO:0060151
gi_351598233_gb_JP452761.1	GO:0000023	GO:0005576	GO:0007020	GO:0009505	GO:0009911	GO:0009965	GO:0016023	GO:0016139	GO:0019252	GO:0032940	GO:0043085	GO:0046477	GO:0051682	GO:0052692
gi_351598272_gb_JP452798.1	GO:0004047	GO:0005739	GO:0005743	GO:0005960	GO:0006546	GO:0007389	GO:0008361	GO:0008483	GO:0009534	GO:0009570	GO:0009658	GO:0009926	GO:0009941	GO:0010015	GO:0010075	GO:0016020	GO:0016117	GO:0019344	GO:0022626	GO:0031405	GO:0032259	GO:0042744	GO:0046686	GO:0048046	GO:0048481
gi_351598323_gb_JP452848.1	GO:0005576
gi_351598337_gb_JP452862.1	GO:0002213	GO:0004357	GO:0006094	GO:0006096	GO:0006750	GO:0006865	GO:0008270	GO:0009407	GO:0009408	GO:0009570	GO:0009617	GO:0009626	GO:0009651	GO:0009700	GO:0009753	GO:0009809	GO:0009816	GO:0009908	GO:0010193	GO:0010583	GO:0018456	GO:0019344	GO:0019761	GO:0030244	GO:0045551	GO:0046029	GO:0046686	GO:0047681	GO:0047924	GO:0050832	GO:0052544	GO:0055114
gi_351598388_gb_JP452913.1	GO:0005515	GO:0005525	GO:0005634	GO:0009733	GO:0009739	GO:0009911	GO:0010228	GO:0045841	GO:0072686	GO:2000280
gi_351598397_gb_JP452921.1	GO:0005886	GO:0009506	GO:0009987	GO:0016301	GO:0016310	GO:0042742
gi_351598419_gb_JP452943.1	GO:0000041	GO:0005515	GO:0006821	GO:0006857	GO:0007165	GO:0008271	GO:0008272	GO:0009506	GO:0009507	GO:0009684	GO:0009970	GO:0010167	GO:0015706	GO:0016021	GO:0019344	GO:0019532	GO:0019761	GO:0030003	GO:0044422	GO:0044459	GO:0044463	GO:0046943	GO:0051453	GO:0055085	GO:0070633	GO:0070838	GO:0071310	GO:0080160
gi_351598423_gb_JP452947.1	GO:0004553	GO:0005975	GO:0005976	GO:0009987	GO:0016798	GO:0030674	GO:0051015
gi_351598425_gb_JP452949.1	GO:0009535	GO:0009570	GO:0009611	GO:0009941	GO:0010264	GO:0015979	GO:0016117
gi_351598433_gb_JP452957.1	GO:0005634	GO:0010263	GO:0010686	GO:0016126	GO:0016871	GO:0019745	GO:0034074	GO:0034075	GO:0042299	GO:0042300	GO:0042335	GO:0042561	GO:0048364	GO:0051746	GO:0080003	GO:0080011	GO:0090438
gi_351598447_gb_JP452970.1	GO:0001666	GO:0004364	GO:0004602	GO:0005507	GO:0005773	GO:0005829	GO:0005886	GO:0006098	GO:0006546	GO:0006569	GO:0006952	GO:0006970	GO:0006979	GO:0009407	GO:0009506	GO:0009507	GO:0009570	GO:0009579	GO:0009628	GO:0009684	GO:0009862	GO:0010038	GO:0010043	GO:0010310	GO:0010583	GO:0015698	GO:0016020	GO:0016740	GO:0019252	GO:0019288	GO:0019761	GO:0031347	GO:0042742	GO:0043295	GO:0046686	GO:0046914	GO:0048046	GO:0048527	GO:0048589	GO:0048765	GO:0050832	GO:0051707	GO:0071944
gi_351598454_gb_JP452976.1	GO:0005488	GO:0006952
gi_351598523_gb_JP453040.1	GO:0005506	GO:0005739	GO:0006633	GO:0009414	GO:0010025	GO:0010143	GO:0016020	GO:0016021	GO:0016491	GO:0042335	GO:0042742	GO:0043447	GO:0043668	GO:0044255	GO:0044281	GO:0046185	GO:0048653	GO:0050832	GO:0055114	GO:0071771
gi_351598542_gb_JP453059.1	GO:0006979	GO:0009535	GO:0010027	GO:0019288	GO:0030003	GO:0070838
gi_351598576_gb_JP453093.1	GO:0004091	GO:0005488	GO:0005634	GO:0005829	GO:0006952	GO:0008219	GO:0009628	GO:0009740	GO:0009791	GO:0009860	GO:0014070	GO:0044238	GO:0048513	GO:0048583	GO:0048608	GO:0071702
gi_351598584_gb_JP453101.1	GO:0005886	GO:0009941
gi_351598594_gb_JP453109.1	GO:0000139	GO:0004497	GO:0004499	GO:0005654	GO:0005789	GO:0005829	GO:0009414	GO:0009684	GO:0009742	GO:0009911	GO:0010229	GO:0022603	GO:0042744	GO:0047434	GO:0048825	GO:0050660	GO:0050661	GO:0055114	GO:2000024
gi_351598597_gb_JP453112.1	GO:0003824	GO:0005737	GO:0005886	GO:0006342	GO:0009611	GO:0016787	GO:0044281	GO:0046486	GO:0050789	GO:0051567
gi_351598599_gb_JP453114.1	GO:0000166	GO:0000478	GO:0003883	GO:0005739	GO:0005829	GO:0006221	GO:0006241	GO:0009793	GO:0015949	GO:0042493	GO:0046686
gi_351598609_gb_JP453124.1	GO:0004462	GO:0005515	GO:0005739	GO:0005773	GO:0005777	GO:0005829	GO:0005886	GO:0005975	GO:0006094	GO:0006096	GO:0006749	GO:0009409	GO:0009570	GO:0009651	GO:0009941	GO:0010319	GO:0016151	GO:0019243	GO:0019344	GO:0031977	GO:0046686	GO:0046872
gi_351598627_gb_JP453142.1	GO:0004338	GO:0004565	GO:0004567	GO:0005739	GO:0005975	GO:0008270	GO:0009505	GO:0009507	GO:0016023	GO:0016052	GO:0022626	GO:0033907	GO:0042803	GO:0042973	GO:0043169	GO:0047668	GO:0047701	GO:0048046	GO:0050224	GO:0080079	GO:0080081	GO:0080082	GO:0080083
gi_351598670_gb_JP453183.1	GO:0005516	GO:0005634	GO:0005829	GO:0005886	GO:0006084	GO:0007020	GO:0010075	GO:0010103
gi_351598673_gb_JP453186.1	GO:0004650	GO:0005576	GO:0005975	GO:0016798	GO:0022414	GO:0031224	GO:0032501	GO:0032502	GO:0047911	GO:0071944
gi_351598678_gb_JP453191.1	GO:0000293	GO:0002376	GO:0005216	GO:0005515	GO:0005576	GO:0005747	GO:0006096	GO:0006511	GO:0006826	GO:0006833	GO:0006972	GO:0007030	GO:0008283	GO:0009631	GO:0009651	GO:0009853	GO:0010106	GO:0016021	GO:0016174	GO:0016651	GO:0022900	GO:0044281	GO:0044459	GO:0046686	GO:0048522	GO:0050897	GO:0051788	GO:0055114	GO:0065008	GO:0072593	GO:0080129	GO:0097159
gi_351598680_gb_JP453193.1	GO:0004672	GO:0004674	GO:0004713	GO:0005488	GO:0005524	GO:0005886	GO:0006468	GO:0006950	GO:0008270	GO:0016020	GO:0048544
gi_351598692_gb_JP453204.1	GO:0000271	GO:0001653	GO:0004674	GO:0005524	GO:0005576	GO:0005886	GO:0006468	GO:0006612	GO:0007020	GO:0007169	GO:0007267	GO:0009507	GO:0009556	GO:0009560	GO:0009611	GO:0009616	GO:0009664	GO:0009736	GO:0009742	GO:0009825	GO:0009855	GO:0009887	GO:0009932	GO:0009944	GO:0009963	GO:0010014	GO:0010051	GO:0010075	GO:0010150	GO:0010152	GO:0010267	GO:0010363	GO:0010817	GO:0016021	GO:0033612	GO:0035196	GO:0043481	GO:0048438	GO:0048439	GO:0048653	GO:0048767
gi_351598723_gb_JP453234.1	GO:0004091	GO:0006629	GO:0010228	GO:0016788	GO:0016926	GO:0048046	GO:0050665
gi_351598729_gb_JP453240.1	GO:0005516	GO:0005634
gi_351598838_gb_JP453346.1	GO:0005524	GO:0005739	GO:0005774	GO:0005829	GO:0005886	GO:0006200	GO:0006612	GO:0006855	GO:0006995	GO:0009414	GO:0009506	GO:0009595	GO:0009697	GO:0009723	GO:0009738	GO:0009744	GO:0009749	GO:0009750	GO:0009817	GO:0009862	GO:0009867	GO:0009941	GO:0009963	GO:0010193	GO:0010200	GO:0010310	GO:0010363	GO:0015086	GO:0015416	GO:0015691	GO:0015692	GO:0016020	GO:0016021	GO:0016126	GO:0016132	GO:0019745	GO:0030003	GO:0031348	GO:0042299	GO:0042344	GO:0042538	GO:0042626	GO:0042742	GO:0043069	GO:0043407	GO:0043900	GO:0052541	GO:0052544	GO:0052546
gi_351598843_gb_JP453351.1	GO:0003677	GO:0003682	GO:0005488	GO:0005634	GO:0005737	GO:0006355	GO:0009908	GO:0048262
gi_351598856_gb_JP453364.1	GO:0000023	GO:0006098	GO:0008270	GO:0009228	GO:0009229	GO:0009570	GO:0010266	GO:0016045	GO:0016829	GO:0019252	GO:0019288	GO:0019760	GO:0043085	GO:0051536	GO:0051539	GO:0080041
gi_351598862_gb_JP453370.1	GO:0016021	GO:0055085
gi_351598868_gb_JP453376.1	GO:0002215	GO:0004601	GO:0005576	GO:0005618	GO:0005774	GO:0005794	GO:0005829	GO:0006952	GO:0006979	GO:0009416	GO:0009505	GO:0009615	GO:0009628	GO:0009651	GO:0009684	GO:0009723	GO:0009826	GO:0009908	GO:0010035	GO:0016020	GO:0020037	GO:0040007	GO:0042742	GO:0045926	GO:0046872	GO:0048046	GO:0050832	GO:0051707	GO:0052033	GO:0055114	GO:0072593
gi_351598903_gb_JP453410.1	GO:0000165	GO:0003955	GO:0005739	GO:0005777	GO:0005829	GO:0005886	GO:0006096	GO:0006612	GO:0006635	GO:0006833	GO:0006972	GO:0006979	GO:0007030	GO:0008270	GO:0008752	GO:0009266	GO:0009570	GO:0009651	GO:0009697	GO:0009862	GO:0009867	GO:0010167	GO:0010200	GO:0010310	GO:0010363	GO:0015706	GO:0016045	GO:0031348	GO:0042742	GO:0043900	GO:0046686	GO:0050832
gi_351598913_gb_JP453420.1	GO:0005737	GO:0008146	GO:0009628	GO:0009695	GO:0009735	GO:0009812	GO:0009867	GO:0016131	GO:0019761	GO:0032260	GO:0042430	GO:0043231	GO:0080066	GO:0080067	GO:0080068	GO:0080069	GO:0080070	GO:0080071	GO:0080118	GO:0080131
gi_351599046_gb_JP453550.1	GO:0005085	GO:0006944	GO:0009827	GO:0009860	GO:0016491	GO:0019344	GO:0042802	GO:0080092	GO:0097159
gi_351599047_gb_JP453551.1	GO:0003676
gi_351599092_gb_JP453596.1	GO:0006534	GO:0006950	GO:0008104	GO:0008202	GO:0009055	GO:0009534	GO:0009820	GO:0009908	GO:0009941	GO:0010035	GO:0010154	GO:0015994	GO:0016043	GO:0016491	GO:0016709	GO:0019438	GO:0019439	GO:0042170	GO:0042440	GO:0044270	GO:0044282	GO:0046914	GO:0051536	GO:0051704
gi_351599113_gb_JP453616.1	GO:0010263	GO:0010686	GO:0019745	GO:0034074	GO:0034075	GO:0042299	GO:0042300	GO:0042335	GO:0042561	GO:0048364	GO:0051746	GO:0080003	GO:0080011	GO:0090438
gi_351599219_gb_JP453718.1	GO:0005506	GO:0005739	GO:0005773	GO:0005829	GO:0005886	GO:0006809	GO:0009055	GO:0009416	GO:0009610	GO:0009703	GO:0020037	GO:0022900	GO:0030151	GO:0042128	GO:0043546	GO:0044242	GO:0048767	GO:0050463	GO:0050660	GO:0055114
gi_351599222_gb_JP453721.1	GO:0000226	GO:0000911	GO:0005576	GO:0005783	GO:0005886	GO:0005975	GO:0006306	GO:0006346	GO:0007154	GO:0007389	GO:0008356	GO:0008361	GO:0009505	GO:0009506	GO:0009793	GO:0009909	GO:0009926	GO:0009965	GO:0010015	GO:0010075	GO:0010584	GO:0031048	GO:0032880	GO:0042127	GO:0042973	GO:0043169	GO:0046658	GO:0048449	GO:0051567
gi_351599243_gb_JP453742.1	GO:0000023	GO:0004610	GO:0004614	GO:0004615	GO:0005829	GO:0005975	GO:0006048	GO:0009570	GO:0016853	GO:0019252	GO:0042631	GO:0044237	GO:0044281
gi_351599262_gb_JP453761.1	GO:0002376	GO:0004672	GO:0004674	GO:0005488	GO:0005634	GO:0005773	GO:0005886	GO:0006952	GO:0009506	GO:0009875	GO:0009987	GO:0010033	GO:0016044	GO:0031625	GO:0043067	GO:0046777	GO:0051716
gi_351599271_gb_JP453770.1	GO:0001578	GO:0005506	GO:0006811	GO:0009411	GO:0009647	GO:0009826	GO:0010268	GO:0016020	GO:0016023	GO:0016132	GO:0016491	GO:0016709	GO:0030154	GO:0044237	GO:0045229	GO:0046872	GO:0048443	GO:0048646	GO:0050896	GO:0055114
gi_351599295_gb_JP453792.1	GO:0005515	GO:0005794	GO:0005886	GO:0006857	GO:0006891	GO:0009414	GO:0009506	GO:0009611	GO:0009624	GO:0009705	GO:0009737	GO:0009751	GO:0009753	GO:0009860	GO:0010119	GO:0010167	GO:0010351	GO:0015112	GO:0015334	GO:0015706	GO:0015824	GO:0015996	GO:0016021	GO:0016126	GO:0016558	GO:0019761	GO:0030003	GO:0042538	GO:0042742	GO:0042936	GO:0042937	GO:0042938	GO:0042939	GO:0043201	GO:0052541	GO:0052546	GO:0070838	GO:0080052	GO:0080053	GO:0080168	GO:0090440
gi_351599305_gb_JP453802.1	GO:0000974	GO:0002020	GO:0004872	GO:0005046	GO:0005102	GO:0005524	GO:0005618	GO:0005681	GO:0005730	GO:0005739	GO:0005774	GO:0005783	GO:0005794	GO:0005801	GO:0005829	GO:0005886	GO:0006007	GO:0006200	GO:0006397	GO:0006457	GO:0006621	GO:0006892	GO:0006914	GO:0006986	GO:0007269	GO:0007411	GO:0008021	GO:0008380	GO:0009414	GO:0009506	GO:0009507	GO:0009615	GO:0009617	GO:0009644	GO:0009986	GO:0010286	GO:0015031	GO:0016021	GO:0016044	GO:0016363	GO:0016567	GO:0019048	GO:0022626	GO:0031625	GO:0031969	GO:0032440	GO:0034976	GO:0042470	GO:0042538
gi_351599336_gb_JP453833.1	GO:0005856	GO:0007166	GO:0007389	GO:0007420	GO:0007423	GO:0016192	GO:0016482	GO:0019899	GO:0021515	GO:0021953	GO:0031981	GO:0034765	GO:0042592	GO:0043009	GO:0044237	GO:0044444	GO:0044459	GO:0048468	GO:0048646	GO:0051050	GO:0051924	GO:0055117	GO:0060255	GO:0060429	GO:0072358	GO:0072659	GO:0086001	GO:0086065
gi_351599343_gb_JP453840.1	GO:0005768	GO:0005794	GO:0005802	GO:0005982	GO:0009834	GO:0009888	GO:0010413	GO:0010417	GO:0015020	GO:0045492	GO:0080116
gi_351599347_gb_JP453844.1	GO:0005829	GO:0006865	GO:0009407	GO:0009507	GO:0009718	GO:0009723	GO:0010224	GO:0010294	GO:0010583	GO:0016131	GO:0047213	GO:0047893	GO:0050403	GO:0050502	GO:0050896	GO:0051555	GO:0051707	GO:0080043	GO:0080044	GO:0080046
gi_351599368_gb_JP453865.1	GO:0005576	GO:0005886	GO:0009723	GO:0009825
gi_351599391_gb_JP453887.1	GO:0000271	GO:0005576	GO:0007389	GO:0008361	GO:0009814	GO:0009827	GO:0009926	GO:0009932	GO:0030570	GO:0042547	GO:0043481	GO:0045490	GO:0046658	GO:0046872	GO:0048767
gi_351599392_gb_JP453888.1	GO:0006066	GO:0006952	GO:0016614	GO:0019752	GO:0043231	GO:0044238	GO:0044444	GO:0046202	GO:0046593	GO:0050660	GO:0050898	GO:0055114
gi_351599415_gb_JP453911.1	GO:0000271	GO:0005576	GO:0005618	GO:0005794	GO:0006073	GO:0007389	GO:0008361	GO:0009408	GO:0009409	GO:0009414	GO:0009505	GO:0009506	GO:0009507	GO:0009611	GO:0009612	GO:0009645	GO:0009664	GO:0009733	GO:0009741	GO:0009825	GO:0009926	GO:0009932	GO:0010089	GO:0010200	GO:0010411	GO:0016020	GO:0016126	GO:0016762	GO:0033946	GO:0043481	GO:0048046	GO:0048767	GO:0080039
gi_351599451_gb_JP453945.1	GO:0000911	GO:0005085	GO:0005515	GO:0005525	GO:0005634	GO:0005829	GO:0005886	GO:0006084	GO:0007020	GO:0007264	GO:0009855	GO:0010014	GO:0010075	GO:0010090	GO:0016043	GO:0016126	GO:0016132	GO:0016192	GO:0019220	GO:0019898	GO:0030695	GO:0042995	GO:0043229	GO:0045010	GO:0048699	GO:0050790	GO:0050896	GO:0051020	GO:0070971	GO:0071704	GO:0080090
gi_351599480_gb_JP453973.1	GO:0004351	GO:0005516	GO:0005634	GO:0005829	GO:0006536	GO:0006612	GO:0006833	GO:0009506	GO:0009651	GO:0009750	GO:0009963	GO:0010363	GO:0016020	GO:0030170	GO:0046686	GO:0051454	GO:0070838
gi_351599485_gb_JP453978.1	GO:0005488	GO:0005576	GO:0006351	GO:0008283	GO:0009535	GO:0009941	GO:0010556	GO:0031090	GO:0031326	GO:0043412	GO:0044237	GO:0048513	GO:0050896	GO:0071944	GO:0080090
gi_351599500_gb_JP453993.1	GO:0035251	GO:0044444	GO:0050896	GO:0071704
gi_351599509_gb_JP454002.1	GO:0006351	GO:0007165	GO:0007507	GO:0008092	GO:0009887	GO:0009888	GO:0019222	GO:0030017	GO:0030239	GO:0043231	GO:0044446	GO:0048699
gi_351599535_gb_JP454027.1	GO:0006464	GO:0006996	GO:0007275
gi_351599573_gb_JP454063.1	GO:0016787	GO:0016810	GO:0018788
gi_351599594_gb_JP454083.1	GO:0005515
gi_351599611_gb_JP454100.1	GO:0000271	GO:0000303	GO:0005516	GO:0005524	GO:0005634	GO:0005886	GO:0006200	GO:0006888	GO:0007155	GO:0008361	GO:0008559	GO:0009407	GO:0009414	GO:0009506	GO:0009624	GO:0009637	GO:0009640	GO:0009735	GO:0009738	GO:0009743	GO:0009753	GO:0009793	GO:0009825	GO:0009873	GO:0009932	GO:0009958	GO:0010048	GO:0010090	GO:0010160	GO:0010218	GO:0010228	GO:0010315	GO:0010328	GO:0010329	GO:0010540	GO:0010541	GO:0010583	GO:0015408	GO:0016021	GO:0042538	GO:0043090	GO:0043161	GO:0043248	GO:0043481	GO:0045010	GO:0045893	GO:0048440	GO:0048443	GO:0048527
gi_351599612_gb_JP454101.1	GO:0000902	GO:0005768	GO:0005794	GO:0005802	GO:0005886	GO:0006096	GO:0006816	GO:0006833	GO:0007030	GO:0008270	GO:0009266	GO:0009507	GO:0009750	GO:0009825	GO:0009833	GO:0009834	GO:0009863	GO:0009867	GO:0009873	GO:0010089	GO:0010214	GO:0010228	GO:0010400	GO:0010413	GO:0016021	GO:0016760	GO:0016761	GO:0016926	GO:0019761	GO:0030244	GO:0042538	GO:0042742	GO:0045492	GO:0046686	GO:0048193	GO:0048767	GO:0050665	GO:0050832	GO:0052386
gi_351599623_gb_JP454112.1	GO:0005578	GO:0005618	GO:0005774	GO:0008422	GO:0009044	GO:0009505	GO:0010214	GO:0031222	GO:0042285	GO:0045493	GO:0046556	GO:0046685	GO:0048046
gi_351599627_gb_JP454116.1	GO:0008374	GO:0009653	GO:0009813	GO:0016043	GO:0016410	GO:0016740	GO:0044249	GO:0048731	GO:0050896
gi_351599628_gb_JP454117.1	GO:0000165	GO:0002679	GO:0004601	GO:0005509	GO:0005634	GO:0005794	GO:0005887	GO:0006612	GO:0006826	GO:0007231	GO:0009408	GO:0009409	GO:0009414	GO:0009611	GO:0009697	GO:0009733	GO:0009738	GO:0009845	GO:0009862	GO:0009867	GO:0009873	GO:0010106	GO:0010119	GO:0010167	GO:0010228	GO:0010363	GO:0015706	GO:0016021	GO:0016043	GO:0016174	GO:0016175	GO:0016926	GO:0022900	GO:0030968	GO:0031348	GO:0033500	GO:0042538	GO:0042744	GO:0043069	GO:0043621	GO:0050664	GO:0050665	GO:0050832	GO:0052542	GO:0097159
gi_351599644_gb_JP454133.1	GO:0000271	GO:0003700	GO:0004674	GO:0005524	GO:0005634	GO:0005829	GO:0005886	GO:0005983	GO:0006468	GO:0007020	GO:0007169	GO:0009414	GO:0009507	GO:0009825	GO:0009932	GO:0009934	GO:0010075	GO:0010480	GO:0010817	GO:0016161	GO:0033612	GO:0043169	GO:0043481	GO:0043621	GO:0048229	GO:0048767	GO:0048831	GO:0071555	GO:0080027
gi_351599670_gb_JP454159.1	GO:0004338	GO:0004565	GO:0004567	GO:0005739	GO:0005975	GO:0008270	GO:0009505	GO:0009507	GO:0016023	GO:0016052	GO:0022626	GO:0033907	GO:0042803	GO:0042973	GO:0043169	GO:0047668	GO:0047701	GO:0048046	GO:0050224	GO:0080079	GO:0080081	GO:0080082	GO:0080083
gi_351599697_gb_JP454185.1	GO:0000041	GO:0005506	GO:0005515	GO:0005576	GO:0005783	GO:0006631	GO:0009055	GO:0010345	GO:0018685	GO:0019825	GO:0020037	GO:0042761	GO:0055114	GO:0070330
gi_351599720_gb_JP454207.1	GO:0000271	GO:0002237	GO:0004675	GO:0004713	GO:0005496	GO:0005515	GO:0005524	GO:0005768	GO:0005886	GO:0006468	GO:0006888	GO:0006952	GO:0007049	GO:0007169	GO:0007178	GO:0009605	GO:0009691	GO:0009729	GO:0009734	GO:0009742	GO:0009826	GO:0009911	GO:0010075	GO:0010103	GO:0010224	GO:0010233	GO:0010268	GO:0010305	GO:0010584	GO:0016021	GO:0016023	GO:0032440	GO:0042803	GO:0043090	GO:0043234	GO:0046982	GO:0048366	GO:0048443	GO:0048657	GO:0055114	GO:0060548	GO:0071555	GO:1900140
gi_351599739_gb_JP454225.1	GO:0006952	GO:0009607	GO:0016787	GO:0044237	GO:0050794	GO:0051704	GO:0051716	GO:0071704
gi_351599758_gb_JP454244.1	GO:0003712	GO:0004402	GO:0005516	GO:0005576	GO:0005634	GO:0005774	GO:0006355	GO:0006357	GO:0006473	GO:0007623	GO:0008134	GO:0008270	GO:0009409	GO:0009553	GO:0009555	GO:0009611	GO:0009651	GO:0009723	GO:0009734	GO:0009738	GO:0009739	GO:0009751	GO:0009753	GO:0009954	GO:0010167	GO:0010182	GO:0010200	GO:0010227	GO:0016043	GO:0016573	GO:0042542	GO:0043232	GO:0043234	GO:0044451	GO:0048439	GO:0048518	GO:0048573	GO:0051973
gi_351599790_gb_JP454275.1	GO:0016020	GO:0016132
gi_351599801_gb_JP454285.1	GO:0005515	GO:0009579	GO:0016127	GO:0016740	GO:0034434	GO:0043231	GO:0044444
gi_351599807_gb_JP454291.1	GO:0005507	GO:0005739	GO:0005829	GO:0006561	GO:0008202	GO:0008270	GO:0009408	GO:0009414	GO:0009733	GO:0009741	GO:0009750	GO:0010089	GO:0010115	GO:0010301	GO:0042742	GO:0044036	GO:0047044	GO:0051504	GO:0055114
gi_351599816_gb_JP454300.1	GO:0005886	GO:0009414	GO:0009624	GO:0009630	GO:0009705	GO:0010043	GO:0010540	GO:0016021	GO:0022821	GO:0048364	GO:0055069	GO:0055085	GO:0080167	GO:0090333
gi_351599891_gb_JP454372.1	GO:0005618	GO:0005634	GO:0006005	GO:0006857	GO:0009409	GO:0009505	GO:0009734	GO:0010103	GO:0016023	GO:0019684	GO:0019853	GO:0030003	GO:0030145	GO:0031012	GO:0031640	GO:0045735	GO:0048046	GO:0050162	GO:0050577	GO:0050829	GO:0050830	GO:0050832	GO:0070838
gi_351599899_gb_JP454380.1	GO:0004672	GO:0006007	GO:0006950	GO:0006970	GO:0006996	GO:0007126	GO:0009506	GO:0009617	GO:0009742	GO:0009791	GO:0009860	GO:0010035	GO:0010483	GO:0016310	GO:0016324	GO:0031323	GO:0031347	GO:0033692	GO:0035194	GO:0043680	GO:0044238	GO:0044260	GO:0045087	GO:0046777	GO:0046907	GO:0050832	GO:0051510	GO:0070918	GO:0071669	GO:0090404
gi_351599958_gb_JP454437.1	GO:0004497	GO:0009628	GO:0016705	GO:0016709	GO:0019395	GO:0019825	GO:0043231	GO:0044444	GO:0046872
gi_351599962_gb_JP454441.1	GO:0001664	GO:0003924	GO:0004871	GO:0005525	GO:0005634	GO:0005834	GO:0006184	GO:0007188	GO:0009630	GO:0009652	GO:0009723	GO:0009737	GO:0009744	GO:0009749	GO:0009750	GO:0010555	GO:0031683	GO:2000067
gi_351599976_gb_JP454455.1	GO:0005451	GO:0005886	GO:0006855	GO:0015238	GO:0015297	GO:0015695	GO:0031348	GO:0031988	GO:0046685
gi_351599986_gb_JP454465.1	GO:0004364	GO:0005634	GO:0005774	GO:0005794	GO:0005829	GO:0005886	GO:0006094	GO:0006096	GO:0006635	GO:0006979	GO:0009407	GO:0009409	GO:0009570	GO:0009635	GO:0009651	GO:0010583	GO:0016036	GO:0016829	GO:0019375	GO:0019899	GO:0042430	GO:0042631	GO:0043161	GO:0043295	GO:0044262	GO:0046686	GO:0048046	GO:0051788	GO:0080129	GO:2000030
gi_351600024_gb_JP454501.1	GO:0000165	GO:0004683	GO:0005509	GO:0005515	GO:0005524	GO:0005634	GO:0005773	GO:0005777	GO:0005789	GO:0005829	GO:0005886	GO:0006468	GO:0006612	GO:0006862	GO:0006888	GO:0006944	GO:0009409	GO:0009414	GO:0009507	GO:0009611	GO:0009697	GO:0009723	GO:0009733	GO:0009789	GO:0009827	GO:0009862	GO:0009867	GO:0010119	GO:0010359	GO:0010363	GO:0015696	GO:0015802	GO:0030968	GO:0031348	GO:0032880	GO:0042538	GO:0043069	GO:0043090	GO:0046686	GO:0046777	GO:0048767	GO:0050832	GO:0080092
gi_351600120_gb_JP454596.1	GO:0000394	GO:0005737	GO:0005886	GO:0006260	GO:0006306	GO:0006974	GO:0008283	GO:0008898	GO:0009086	GO:0009616	GO:0010050	GO:0010269	GO:0016205	GO:0032259	GO:0033528	GO:0043687	GO:0045893	GO:0046872	GO:0051567
gi_351600128_gb_JP454604.1	GO:0000060	GO:0000166	GO:0003677	GO:0003723	GO:0005487	GO:0005730	GO:0005737	GO:0006355	GO:0009790	GO:0017069	GO:0033120	GO:0033554	GO:0036002	GO:0042742	GO:0045292	GO:0046872	GO:0048306	GO:0071013	GO:0090316
gi_351600143_gb_JP454619.1	GO:0004382	GO:0005516	GO:0005615	GO:0005739	GO:0005768	GO:0005794	GO:0005802	GO:0005886	GO:0009846	GO:0016021	GO:0016023	GO:0016787	GO:0016887	GO:0042732	GO:0045134
gi_351600151_gb_JP454626.1	GO:0009505	GO:0016020
gi_351600162_gb_JP454636.1	GO:0000398	GO:0003002	GO:0003676	GO:0003723	GO:0004518	GO:0004525	GO:0005515	GO:0005634	GO:0005737	GO:0006342	GO:0007267	GO:0008026	GO:0009616	GO:0009653	GO:0009791	GO:0009855	GO:0010014	GO:0010050	GO:0010073	GO:0010216	GO:0010267	GO:0016043	GO:0016569	GO:0019827	GO:0030422	GO:0035196	GO:0043231	GO:0043687	GO:0045893	GO:0048608	GO:0048699	GO:2000026
gi_351600171_gb_JP454644.1	GO:0000413	GO:0003755	GO:0004383	GO:0004674	GO:0004715	GO:0005524	GO:0005886	GO:0006182	GO:0006457	GO:0006468	GO:0006952	GO:0009311	GO:0009617	GO:0009620	GO:0009719	GO:0009751	GO:0009826	GO:0009992	GO:0016301	GO:0030247	GO:0048527	GO:0048608
gi_351600173_gb_JP454646.1	GO:0004887	GO:0005730	GO:0005739	GO:0005768	GO:0005802	GO:0005829	GO:0006357	GO:0007166	GO:0008060	GO:0008270	GO:0009555	GO:0010227	GO:0030276	GO:0031532	GO:0032312	GO:0032857	GO:0035267	GO:0043168	GO:0043967	GO:0043968	GO:0044424	GO:0045648	GO:0046872	GO:0097159	GO:2000369
gi_351600179_gb_JP454651.1	GO:0005576	GO:0005768	GO:0005794	GO:0005802	GO:0006486	GO:0007219	GO:0016757
gi_351600192_gb_JP454664.1	GO:0005488	GO:0006952	GO:0044464
gi_351600264_gb_JP454735.1	GO:0043231
gi_351600269_gb_JP454740.1	GO:0005515	GO:0006826	GO:0009536	GO:0010106	GO:0010167	GO:0010264	GO:0015105	GO:0015115	GO:0015168	GO:0015204	GO:0015250	GO:0015700	GO:0015706	GO:0015708	GO:0016021	GO:0016328	GO:0031347	GO:0046685	GO:0046713	GO:0048226	GO:0080029	GO:0080138
gi_351600280_gb_JP454751.1	GO:0005739	GO:0006457	GO:0009507	GO:0009644	GO:0010286	GO:0042542	GO:0045471	GO:0046685	GO:0046686	GO:0046688	GO:0051260
gi_351600283_gb_JP454754.1	GO:0044464
gi_351600324_gb_JP454795.1	GO:0002215	GO:0002679	GO:0004601	GO:0005576	GO:0005634	GO:0005774	GO:0005794	GO:0006612	GO:0006826	GO:0006979	GO:0009269	GO:0009409	GO:0009505	GO:0009506	GO:0009664	GO:0009808	GO:0009863	GO:0009908	GO:0010106	GO:0010167	GO:0010200	GO:0010359	GO:0010363	GO:0015706	GO:0016023	GO:0016132	GO:0016757	GO:0020037	GO:0042538	GO:0043069	GO:0046872	GO:0048046	GO:0048527	GO:0048589	GO:0048765	GO:0050832	GO:0055114	GO:0071456
gi_351600392_gb_JP454860.1	GO:0005507	GO:0005576	GO:0008447	GO:0009414	GO:0009809	GO:0009832	GO:0010413	GO:0016023	GO:0016491	GO:0045492	GO:0046274	GO:0046688	GO:0048046	GO:0052716	GO:0055114
gi_351600433_gb_JP454901.1	GO:0005488
gi_351600515_gb_JP454982.1	GO:0004722	GO:0005634	GO:0005739	GO:0005886	GO:0006470	GO:0006612	GO:0006944	GO:0008270	GO:0008287	GO:0009507	GO:0010200	GO:0010363	GO:0030968	GO:0043069	GO:0046872	GO:0052542
gi_351600718_gb_JP455180.1	GO:0000165	GO:0003677	GO:0003700	GO:0005634	GO:0006612	GO:0009617	GO:0009862	GO:0009867	GO:0009965	GO:0010052	GO:0010310	GO:0010363	GO:0031348	GO:0035304	GO:0045597	GO:0045893	GO:0051782
gi_351600745_gb_JP455207.1	GO:0005488	GO:0006464	GO:0006810	GO:0006952	GO:0006996	GO:0007049	GO:0007165	GO:0009617	GO:0009653	GO:0009725	GO:0009790	GO:0010431	GO:0016020	GO:0016301	GO:0030154	GO:0034645	GO:0040007	GO:0043231	GO:0044444	GO:0048443	GO:0048507	GO:0071554	GO:0090304	GO:2000026
gi_351600776_gb_JP455237.1	GO:0004722	GO:0005515	GO:0005634	GO:0005794	GO:0005829	GO:0005886	GO:0006469	GO:0006470	GO:0008287	GO:0009062	GO:0009408	GO:0009409	GO:0009414	GO:0009536	GO:0009610	GO:0009611	GO:0009640	GO:0009658	GO:0009723	GO:0009733	GO:0009753	GO:0009788	GO:0009793	GO:0009909	GO:0009933	GO:0009939	GO:0010030	GO:0010119	GO:0010150	GO:0010182	GO:0010205	GO:0010228	GO:0016114	GO:0016567	GO:0019915	GO:0033106	GO:0042538	GO:0046872	GO:0048838	GO:0050826
gi_351600780_gb_JP455241.1	GO:0005774	GO:0005886	GO:0006007	GO:0006486	GO:0006813	GO:0009555	GO:0009674	GO:0009932	GO:0015079	GO:0016023	GO:0071805
gi_351600859_gb_JP455317.1	GO:0000122	GO:0000183	GO:0000793	GO:0000977	GO:0001103	GO:0003677	GO:0003682	GO:0004003	GO:0004386	GO:0005506	GO:0005524	GO:0005634	GO:0005677	GO:0005703	GO:0005705	GO:0005730	GO:0005737	GO:0005813	GO:0006200	GO:0006302	GO:0006346	GO:0006352	GO:0006355	GO:0007051	GO:0007476	GO:0008270	GO:0008283	GO:0009733	GO:0009736	GO:0009739	GO:0009788	GO:0009792	GO:0016246	GO:0016581	GO:0016584	GO:0016589	GO:0016740	GO:0031213	GO:0034080	GO:0035042	GO:0035064	GO:0040007	GO:0040027	GO:0040035	GO:0043596	GO:0045111	GO:0045893	GO:0048477	GO:0048557
gi_351600860_gb_JP455318.1	GO:0005886	GO:0006457	GO:0006863	GO:0008506	GO:0009408	GO:0009644	GO:0010167	GO:0015145	GO:0015706	GO:0015770	GO:0016021	GO:0034976	GO:0042542	GO:0055085
gi_351600871_gb_JP455329.1	GO:0006952	GO:0006970	GO:0009664	GO:0009755	GO:0009832	GO:0010035	GO:0016020	GO:0016757	GO:0016759	GO:0030243	GO:0032787	GO:0033692	GO:0043231	GO:0044036	GO:0044444	GO:0048856	GO:0051707	GO:0071944
gi_351600928_gb_JP455385.1	GO:0006066	GO:0006952	GO:0007267	GO:0009553	GO:0010430	GO:0016614	GO:0043231	GO:0044444	GO:0046202	GO:0046593	GO:0050660	GO:0050898
gi_351600932_gb_JP455389.1	GO:0005794	GO:0009505	GO:0009506	GO:0046658
gi_351601062_gb_JP455515.1	GO:0005634	GO:0005829
gi_351601127_gb_JP455579.1	GO:0016787
gi_351601188_gb_JP455639.1	GO:0004672	GO:0004674	GO:0005524	GO:0005886	GO:0006468	GO:0006812	GO:0006820	GO:0007165	GO:0007267	GO:0009616	GO:0009617	GO:0009887	GO:0009888	GO:0010267	GO:0016043	GO:0031347	GO:0035196	GO:0048367	GO:0071554	GO:0071702	GO:0071705
gi_351601213_gb_JP455664.1	GO:0004045	GO:0005515	GO:0005739	GO:0005829	GO:0009507	GO:0010629	GO:2000210	GO:2000811
gi_351601483_gb_JP455928.1	GO:0005634	GO:0016126	GO:0019745	GO:0042299	GO:0042300	GO:0042335	GO:0042561	GO:0090438
gi_351601493_gb_JP455938.1	GO:0001666	GO:0004364	GO:0004602	GO:0005507	GO:0005773	GO:0005829	GO:0005886	GO:0006098	GO:0006979	GO:0009407	GO:0009506	GO:0009570	GO:0009579	GO:0009862	GO:0010043	GO:0010310	GO:0010583	GO:0015698	GO:0016740	GO:0019252	GO:0019288	GO:0019761	GO:0042430	GO:0042742	GO:0043295	GO:0046686	GO:0048046	GO:0048527	GO:0048589	GO:0048765	GO:0050832
gi_351601723_gb_JP456164.1	GO:0001560	GO:0004021	GO:0004069	GO:0004121	GO:0004838	GO:0005739	GO:0005773	GO:0005829	GO:0006098	GO:0006103	GO:0006536	GO:0006546	GO:0006559	GO:0006569	GO:0006572	GO:0006636	GO:0009106	GO:0009108	GO:0009414	GO:0009611	GO:0009620	GO:0009627	GO:0009684	GO:0009695	GO:0009697	GO:0009723	GO:0009733	GO:0009738	GO:0009867	GO:0009965	GO:0010188	GO:0010189	GO:0014070	GO:0016020	GO:0019252	GO:0019288	GO:0019344	GO:0019761	GO:0030154	GO:0033855	GO:0042538	GO:0042742	GO:0043168	GO:0045893	GO:0048046	GO:0048830	GO:0050362	GO:0080108
gi_351601731_gb_JP456172.1	GO:0003824	GO:0005515	GO:0005737	GO:0005856	GO:0005886	GO:0007165	GO:0008152	GO:0016021	GO:0019898	GO:0043231	GO:0044444	GO:0046872
gi_351601797_gb_JP456235.1	GO:0009718	GO:0009744	GO:0010224	GO:0016758	GO:0035252	GO:0043473	GO:0044444	GO:1901038
gi_351601822_gb_JP456260.1	GO:0005794	GO:0009505	GO:0009506	GO:0016049	GO:0046658	GO:0048513	GO:0065007	GO:0071840
gi_351601855_gb_JP456293.1	GO:0000139	GO:0000166	GO:0004382	GO:0005516	GO:0005615	GO:0005739	GO:0005768	GO:0005783	GO:0005802	GO:0005886	GO:0006096	GO:0006487	GO:0006493	GO:0006810	GO:0008283	GO:0008894	GO:0009272	GO:0009846	GO:0009986	GO:0014066	GO:0016020	GO:0016021	GO:0016049	GO:0016462	GO:0016887	GO:0030659	GO:0032026	GO:0034976	GO:0036178	GO:0036187	GO:0036244	GO:0042732	GO:0045134	GO:0046034	GO:0046048	GO:0046710	GO:0051084	GO:0051592
gi_351601888_gb_JP456325.1	GO:0003838	GO:0005739	GO:0005773	GO:0005783	GO:0005829	GO:0005886	GO:0006084	GO:0006598	GO:0006696	GO:0009506	GO:0009611	GO:0009793	GO:0009805	GO:0016126	GO:0016132	GO:0019745	GO:0031090	GO:0032259	GO:0035690	GO:0042398
gi_351601889_gb_JP456326.1	GO:0009507	GO:0010027	GO:0010270
gi_351601981_gb_JP456417.1	GO:0004672	GO:0005515	GO:0005737	GO:0006952	GO:0006955	GO:0007389	GO:0008544	GO:0009059	GO:0009617	GO:0009755	GO:0009886	GO:0016020	GO:0016049	GO:0030154	GO:0032989	GO:0033993	GO:0038023	GO:0043412	GO:0044238	GO:0044260	GO:0045229	GO:0048443	GO:0048610	GO:0048646	GO:0060560	GO:0097159	GO:0097305	GO:2000026
gi_351602019_gb_JP456454.1	GO:0005739	GO:0005829	GO:0006623	GO:0006944	GO:0006952	GO:0008233	GO:0016740	GO:0019760	GO:0048193
gi_351602024_gb_JP456459.1	GO:0003333	GO:0005887	GO:0006612	GO:0006833	GO:0009624	GO:0009651	GO:0009750	GO:0009963	GO:0010363	GO:0015171	GO:0015172	GO:0015174	GO:0015175	GO:0015399	GO:0015804	GO:0015809	GO:0015810	GO:0015827	GO:0016021	GO:0030003	GO:0043090	GO:0070838
gi_351602034_gb_JP456469.1	GO:0005215	GO:0005509	GO:0005515	GO:0005794	GO:0005886	GO:0005976	GO:0006807	GO:0006857	GO:0009414	GO:0009506	GO:0009611	GO:0009624	GO:0009664	GO:0009705	GO:0009737	GO:0009751	GO:0009753	GO:0009860	GO:0010119	GO:0010167	GO:0015112	GO:0015334	GO:0015706	GO:0030001	GO:0042538	GO:0042742	GO:0042936	GO:0042937	GO:0042938	GO:0042939	GO:0043201	GO:0044036	GO:0046907	GO:0080052	GO:0080053	GO:0080168	GO:0090440
gi_351602040_gb_JP456475.1	GO:0003677	GO:0003700	GO:0005634	GO:0005886	GO:0006355	GO:0009941	GO:0010321	GO:0042742	GO:0045491	GO:0046872	GO:0048510	GO:0048653
gi_351602165_gb_JP456596.1	GO:0006952	GO:0016787	GO:0044237	GO:0050794	GO:0051707	GO:0051716	GO:0071704
gi_351602166_gb_JP456597.1	GO:0005794	GO:0005886	GO:0009505	GO:0009506	GO:0009834	GO:0009987	GO:0016023	GO:0031225	GO:0046658	GO:0071704
gi_351602169_gb_JP456600.1	GO:0009522	GO:0009535	GO:0015979	GO:0016021	GO:0016168	GO:0019344	GO:0030003	GO:0070838
gi_351602179_gb_JP456610.1	GO:0044424	GO:0048235
gi_351602213_gb_JP456642.1	GO:0003825	GO:0004805	GO:0005634	GO:0005739	GO:0005829	GO:0005992	GO:0006007	GO:0007165	GO:0009267	GO:0009405	GO:0009507	GO:0009611	GO:0009744	GO:0009750	GO:0009753	GO:0009790	GO:0010035	GO:0010093	GO:0016099	GO:0034599	GO:0034605	GO:0034768	GO:0036168	GO:0036170	GO:0036180	GO:0048440	GO:0048507	GO:0050551	GO:0060257	GO:0071310	GO:0071470	GO:0071669	GO:0080027
gi_351602403_gb_JP456827.1	GO:0000159	GO:0005102	GO:0005524	GO:0005730	GO:0005737	GO:0006200	GO:0008160	GO:0008601	GO:0016853	GO:0016887	GO:0019211	GO:0032515	GO:0032516	GO:0034704	GO:0035307	GO:0035308	GO:0042803	GO:0043065	GO:0046982	GO:0051721
gi_351602501_gb_JP456924.1	GO:0005515	GO:0005576	GO:0006996	GO:0016020	GO:0016023	GO:0032502	GO:0043232	GO:0050794
gi_351602590_gb_JP457011.1	GO:0005634	GO:0005737	GO:0005886	GO:0008171	GO:0009506	GO:0009809	GO:0030744	GO:0030755	GO:0032259	GO:0033799	GO:0044238	GO:0044283	GO:0046983	GO:0047763	GO:0051555
gi_351602692_gb_JP457081.1	GO:0000166	GO:0004672	GO:0005515	GO:0005976	GO:0006464	GO:0006499	GO:0006952	GO:0007049	GO:0007165	GO:0007389	GO:0008544	GO:0009617	GO:0009627	GO:0009628	GO:0009697	GO:0009725	GO:0009790	GO:0009863	GO:0009886	GO:0009887	GO:0010015	GO:0010016	GO:0010431	GO:0010468	GO:0016020	GO:0016043	GO:0016049	GO:0016772	GO:0030154	GO:0031348	GO:0033993	GO:0034645	GO:0043231	GO:0044262	GO:0044444	GO:0048366	GO:0048507	GO:0048589	GO:0048610	GO:0048653	GO:0051301	GO:0071554	GO:2000026
gi_351602874_gb_JP457235.1	GO:0000902	GO:0005618	GO:0005768	GO:0005794	GO:0005802	GO:0005886	GO:0006096	GO:0006816	GO:0006833	GO:0007030	GO:0008270	GO:0009266	GO:0009414	GO:0009507	GO:0009750	GO:0009825	GO:0009833	GO:0009834	GO:0009863	GO:0009867	GO:0009873	GO:0010089	GO:0010116	GO:0010228	GO:0010400	GO:0010413	GO:0016021	GO:0016760	GO:0016761	GO:0016926	GO:0030244	GO:0042538	GO:0042742	GO:0045492	GO:0046686	GO:0048193	GO:0048767	GO:0050665	GO:0050832	GO:0052386
gi_351602960_gb_JP457320.1	GO:0005488	GO:0006952	GO:0044464
gi_351602974_gb_JP457334.1	GO:0009507
gi_351602984_gb_JP457344.1
gi_351602992_gb_JP457352.1	GO:0003735	GO:0005634	GO:0006098	GO:0006139	GO:0006354	GO:0006412	GO:0009073	GO:0009507	GO:0009535	GO:0009570	GO:0009902	GO:0009941	GO:0010027	GO:0015934	GO:0015979	GO:0016043	GO:0016226	GO:0019288	GO:0019843	GO:0034660	GO:0042793	GO:0044249	GO:0044260	GO:0044446	GO:0045036
gi_351603020_gb_JP457380.1	GO:0005488	GO:0006952	GO:0044464
gi_351603043_gb_JP457403.1	GO:0000003	GO:0000166	GO:0003676	GO:0004386	GO:0006139	GO:0009507	GO:0017111	GO:0019243	GO:0030529	GO:0043170	GO:0043231	GO:0044237	GO:0044238	GO:0044444	GO:0046872
gi_351603090_gb_JP457450.1	GO:0005794	GO:0005886	GO:0006694	GO:0009505	GO:0009506	GO:0009834	GO:0009888	GO:0010817	GO:0016043	GO:0016049	GO:0031225	GO:0046165	GO:0046658	GO:0048364	GO:0048589	GO:0071669
gi_351603110_gb_JP457470.1	GO:0005634	GO:0010089	GO:0044036
gi_351603123_gb_JP457482.1	GO:0005515	GO:0005524	GO:0005634	GO:0005773	GO:0005886	GO:0006200	GO:0006754	GO:0006812	GO:0008553	GO:0009414	GO:0009737	GO:0010119	GO:0015992	GO:0016021	GO:0046872
gi_351603163_gb_JP457522.1	GO:0000166	GO:0004672	GO:0006468	GO:0007165	GO:0009560	GO:0009738	GO:0009845	GO:0016020	GO:0016310	GO:0043167	GO:0044238	GO:0044260
gi_351603189_gb_JP457548.1	GO:0004857	GO:0005618	GO:0006612	GO:0006833	GO:0009651	GO:0009750	GO:0009963	GO:0010363	GO:0016020	GO:0016788	GO:0030599	GO:0042545	GO:0042744	GO:0043086	GO:0043231	GO:0044444	GO:0045330	GO:0045490
gi_351603236_gb_JP457595.1	GO:0002679	GO:0004601	GO:0005634	GO:0005783	GO:0005794	GO:0005886	GO:0006612	GO:0006826	GO:0006979	GO:0009269	GO:0009409	GO:0009505	GO:0009506	GO:0009664	GO:0009808	GO:0009863	GO:0010106	GO:0010167	GO:0010200	GO:0010359	GO:0010363	GO:0010413	GO:0015706	GO:0016023	GO:0016132	GO:0016757	GO:0020037	GO:0042538	GO:0043069	GO:0045492	GO:0046872	GO:0048046	GO:0048527	GO:0048589	GO:0048765	GO:0050832	GO:0055114
gi_351603237_gb_JP457596.1	GO:0009507
gi_351603277_gb_JP457636.1	GO:0005488	GO:0006952
gi_351603286_gb_JP457645.1	GO:0006952	GO:0009607	GO:0016787	GO:0044237	GO:0050794	GO:0051704	GO:0051716
gi_351603364_gb_JP457722.1	GO:0005488	GO:0009411	GO:0010033	GO:0016020	GO:0016036	GO:0016099	GO:0016102	GO:0016491	GO:0019375	GO:0036202	GO:0042631	GO:0043231	GO:0055114
gi_351603376_gb_JP457734.1	GO:0005829	GO:0006148	GO:0010150	GO:0035251	GO:0047724
gi_351603435_gb_JP457793.1	GO:0007155	GO:0010090	GO:0016020	GO:0016592	GO:0045010	GO:0048765	GO:0071555	GO:2000762
gi_351603471_gb_JP457829.1	GO:0009410	GO:0009640	GO:0009793	GO:0009845	GO:0009855	GO:0009909	GO:0009944	GO:0010014	GO:0010075	GO:0010162	GO:0010182	GO:0010228	GO:0016458	GO:0016567	GO:0016779	GO:0019915	GO:0048522	GO:0050826
gi_351603518_gb_JP457876.1	GO:0003746	GO:0003924	GO:0005488	GO:0005525	GO:0005829	GO:0006184	GO:0006414	GO:0010467	GO:0042254	GO:0044267	GO:0044424
gi_351603557_gb_JP457914.1	GO:0005085	GO:0005089	GO:0005634	GO:0006944	GO:0009827	GO:0009860	GO:0042802
gi_351603592_gb_JP457949.1	GO:0005634	GO:0008270
gi_351603655_gb_JP458011.1	GO:0003869	GO:0004674	GO:0004721	GO:0005634	GO:0005773	GO:0005829	GO:0006200	GO:0006470	GO:0007088	GO:0008967	GO:0009570	GO:0015629	GO:0015893	GO:0016311	GO:0030027	GO:0030496	GO:0030836	GO:0031072	GO:0031247	GO:0032154	GO:0032465	GO:0032587	GO:0042623	GO:0046581	GO:0048046	GO:0070938	GO:0071318
gi_351603660_gb_JP458016.1	GO:0005634	GO:0005737	GO:0005886	GO:0009506	GO:0009809	GO:0030744	GO:0030755	GO:0030761	GO:0032259	GO:0033799	GO:0044238	GO:0044283	GO:0046983	GO:0047763	GO:0050630	GO:0051555
gi_351603665_gb_JP458021.1	GO:0004565	GO:0005488	GO:0005576	GO:0005774	GO:0005829	GO:0005975	GO:0006084	GO:0006598	GO:0009505	GO:0009506	GO:0009536	GO:0009664	GO:0009698	GO:0009832	GO:0010075	GO:0016023	GO:0016126	GO:0016132	GO:0030246	GO:0032880	GO:0042398	GO:0042744	GO:0043169	GO:0048767
gi_351603666_gb_JP458022.1	GO:0005774	GO:0005975	GO:0008422	GO:0009044	GO:0009505	GO:0010214	GO:0031222	GO:0042285	GO:0045493	GO:0046556	GO:0046685	GO:0048046
gi_351603670_gb_JP458026.1	GO:0005576	GO:0005975	GO:0008810	GO:0009507	GO:0009664	GO:0010054	GO:0016023	GO:0030245	GO:0030246	GO:0042547
gi_351603678_gb_JP458034.1	GO:0005737	GO:0006633	GO:0006950	GO:0008610	GO:0008757	GO:0008825	GO:0016491	GO:0032259	GO:0051704	GO:0055114	GO:0071766	GO:0071944
gi_351603705_gb_JP458061.1	GO:0004675	GO:0004715	GO:0005515	GO:0005524	GO:0005576	GO:0005886	GO:0006468	GO:0006952	GO:0006996	GO:0007165	GO:0007178	GO:0008544	GO:0009826	GO:0009886	GO:0009887	GO:0010016	GO:0010033	GO:0016021	GO:0030154	GO:0040008	GO:0043231	GO:0044238	GO:0044260	GO:0044444	GO:0045229	GO:0048507	GO:0048610	GO:0048646	GO:0048653	GO:0051301	GO:0051707	GO:0065008	GO:0097159	GO:2000026
gi_351603714_gb_JP458070.1	GO:0005375	GO:0005381	GO:0005385	GO:0005515	GO:0005886	GO:0006623	GO:0006826	GO:0006829	GO:0006833	GO:0006886	GO:0008270	GO:0009507	GO:0009624	GO:0009630	GO:0010043	GO:0010106	GO:0010167	GO:0015691	GO:0015706	GO:0016021	GO:0016023	GO:0030125	GO:0030244	GO:0032440	GO:0034220	GO:0034755	GO:0035434	GO:0042147	GO:0048193	GO:0048767	GO:0051707	GO:0055114	GO:0071577
gi_351603727_gb_JP458083.1	GO:0004512	GO:0005737	GO:0006021	GO:0006659	GO:0009408	GO:0009644	GO:0009791	GO:0009793	GO:0010039	GO:0010264	GO:0015979	GO:0042542	GO:0042742	GO:0050832	GO:0051607	GO:0055072
gi_351603732_gb_JP458088.1	GO:0000165	GO:0003700	GO:0005524	GO:0005618	GO:0005634	GO:0006612	GO:0007165	GO:0009409	GO:0009526	GO:0009535	GO:0009570	GO:0009579	GO:0009595	GO:0009637	GO:0009639	GO:0009644	GO:0009697	GO:0009719	GO:0009744	GO:0009814	GO:0009862	GO:0009867	GO:0009941	GO:0010114	GO:0010150	GO:0010155	GO:0010200	GO:0010218	GO:0010287	GO:0010310	GO:0010319	GO:0010363	GO:0016020	GO:0019222	GO:0019684	GO:0030234	GO:0031347	GO:0031348	GO:0042742	GO:0043531	GO:0043900	GO:0044237	GO:0046863	GO:0048046	GO:0050790	GO:0050832	GO:0071310
gi_351603739_gb_JP458095.1	GO:0000023	GO:0004335	GO:0004556	GO:0005524	GO:0005829	GO:0009506	GO:0009702	GO:0010021	GO:0010368	GO:0019156	GO:0019252	GO:0019566	GO:0043085	GO:0043169
gi_351603784_gb_JP458140.1	GO:0003962	GO:0005488	GO:0005829	GO:0006534	GO:0006730	GO:0009086	GO:0009970	GO:0016765	GO:0018826	GO:0019458	GO:0030170	GO:0042631	GO:0051289
gi_351603794_gb_JP458149.1	GO:0000041
gi_351603796_gb_JP458151.1	GO:0000325	GO:0005319	GO:0005524	GO:0005634	GO:0005774	GO:0005794	GO:0005887	GO:0006200	GO:0006766	GO:0006855	GO:0006979	GO:0008514	GO:0009408	GO:0009506	GO:0009627	GO:0009697	GO:0010290	GO:0015431	GO:0015732	GO:0016021	GO:0016324	GO:0019904	GO:0030644	GO:0031427	GO:0042626	GO:0043627	GO:0044238	GO:0046483	GO:0046685	GO:0048046	GO:0055085	GO:0070327
gi_351603805_gb_JP458160.1	GO:0005576	GO:0005886	GO:0009506	GO:0031507	GO:0045787
gi_351603821_gb_JP458176.1	GO:0000023	GO:0004618	GO:0005524	GO:0005618	GO:0005634	GO:0005739	GO:0005829	GO:0006096	GO:0006098	GO:0009409	GO:0009570	GO:0009579	GO:0009658	GO:0009697	GO:0009744	GO:0009749	GO:0009814	GO:0009941	GO:0010027	GO:0010319	GO:0016020	GO:0016310	GO:0019252	GO:0019253	GO:0019288	GO:0019344	GO:0019684	GO:0019761	GO:0030003	GO:0042742	GO:0042744	GO:0046686	GO:0048046	GO:0048481	GO:0070838
gi_351603836_gb_JP458191.1	GO:0000038	GO:0005488	GO:0005506	GO:0005783	GO:0006891	GO:0006944	GO:0009055	GO:0009733	GO:0009809	GO:0009813	GO:0010224	GO:0016020	GO:0016711	GO:0020037	GO:0033772	GO:0043069	GO:0046424	GO:0055114	GO:0080132
gi_351603859_gb_JP458214.1	GO:0000166	GO:0003978	GO:0005795	GO:0005829	GO:0005886	GO:0006012	GO:0006950	GO:0009555	GO:0009969	GO:0010053	GO:0010246	GO:0010306	GO:0019388	GO:0033358	GO:0042546	GO:0042803	GO:0045227	GO:0046983	GO:0050373	GO:0050662
gi_351603878_gb_JP458233.1	GO:0000271	GO:0000272	GO:0005750	GO:0005774	GO:0005982	GO:0006096	GO:0006816	GO:0006833	GO:0006972	GO:0007030	GO:0008121	GO:0008361	GO:0009060	GO:0009266	GO:0009505	GO:0009531	GO:0009536	GO:0009627	GO:0009651	GO:0009697	GO:0009750	GO:0009808	GO:0009825	GO:0009830	GO:0009834	GO:0009855	GO:0009897	GO:0009909	GO:0009926	GO:0009930	GO:0009932	GO:0009944	GO:0010014	GO:0010051	GO:0010089	GO:0010215	GO:0010413	GO:0016023	GO:0016049	GO:0016570	GO:0030243	GO:0031225	GO:0043481	GO:0045492	GO:0046658	GO:0046686	GO:0048449	GO:0048767	GO:0050832
gi_351603881_gb_JP458236.1	GO:0005515	GO:0009753	GO:0009755	GO:0031347
gi_351603912_gb_JP458267.1	GO:0009505	GO:0009741
gi_351603928_gb_JP458283.1	GO:0004650	GO:0005576	GO:0009505	GO:0009830	GO:0009860	GO:0009901	GO:0010047	GO:0019863	GO:0045490	GO:0046658	GO:0047911	GO:0048235
gi_351603953_gb_JP458308.1	GO:0005515	GO:0005576	GO:0016043	GO:0043229
gi_351603954_gb_JP458309.1	GO:0004190	GO:0005576	GO:0005794	GO:0006508	GO:0006725	GO:0006952	GO:0008233	GO:0009416	GO:0009719	GO:0010033	GO:0016126	GO:0033591	GO:0043231	GO:0043436	GO:0044444	GO:0050794	GO:0051179	GO:0051707	GO:0051716	GO:0052541	GO:0052546
gi_351603990_gb_JP458344.1	GO:0004674	GO:0004715	GO:0004723	GO:0005509	GO:0005516	GO:0005524	GO:0005576	GO:0005634	GO:0005886	GO:0006811	GO:0009506	GO:0009627	GO:0009628	GO:0010150	GO:0010193	GO:0031347	GO:0033554	GO:0046777	GO:0071705
gi_351604012_gb_JP458366.1	GO:0005253	GO:0005886	GO:0008509	GO:0009705	GO:0010044	GO:0010118	GO:0012505	GO:0015140	GO:0015743
gi_351604021_gb_JP458375.1	GO:0000041	GO:0006520	GO:0006612	GO:0006820	GO:0009611	GO:0009636	GO:0009651	GO:0009805	GO:0009850	GO:0009963	GO:0010363	GO:0016757	GO:0042178	GO:0042430	GO:0043231	GO:0044444	GO:0046148	GO:0047209	GO:0080043
gi_351604038_gb_JP458392.1	GO:0010413	GO:0045492
gi_351604058_gb_JP458412.1	GO:0000041	GO:0004672	GO:0005515	GO:0005773	GO:0005886	GO:0009737	GO:0009751	GO:0012501	GO:0016310	GO:0033554	GO:0042742	GO:0044249	GO:0045491
gi_351604070_gb_JP458424.1	GO:0000165	GO:0001666	GO:0003677	GO:0003700	GO:0005634	GO:0006355	GO:0006612	GO:0007275	GO:0008361	GO:0009407	GO:0009409	GO:0009414	GO:0009416	GO:0009507	GO:0009611	GO:0009620	GO:0009695	GO:0009723	GO:0009733	GO:0009738	GO:0009744	GO:0009753	GO:0009788	GO:0009862	GO:0009867	GO:0010150	GO:0010200	GO:0010286	GO:0010363	GO:0010583	GO:0030968	GO:0031348	GO:0042538	GO:0043069	GO:0043424	GO:0045893	GO:0046982	GO:0050832
gi_351604114_gb_JP458468.1	GO:0005488	GO:0009506	GO:0043231	GO:0044444	GO:0045087	GO:0051179	GO:0051707	GO:0051716
gi_351604122_gb_JP458476.1	GO:0009653	GO:0009699	GO:0016043	GO:0016410	GO:0016746	GO:0044238	GO:0048731	GO:0050734	GO:0050896	GO:0051179
gi_351604131_gb_JP458485.1	GO:0000145	GO:0005634	GO:0005829	GO:0006826	GO:0006865	GO:0006904	GO:0010106	GO:0010167	GO:0015706	GO:0044464
gi_351604136_gb_JP458490.1	GO:0005515	GO:0007165	GO:0015672	GO:0016482	GO:0030424	GO:0034765	GO:0043231	GO:0043232	GO:0044422	GO:0044444	GO:0044459	GO:0045184	GO:0048468	GO:0048731	GO:0050801	GO:0051050	GO:0051924	GO:0055117	GO:0071704	GO:0072659	GO:0086001	GO:0086065
gi_351604139_gb_JP458493.1	GO:0008374	GO:0009813	GO:0016410	GO:0016740	GO:0044249
gi_351604153_gb_JP458507.1	GO:0000165	GO:0005509	GO:0005515	GO:0006098	GO:0006364	GO:0006612	GO:0008266	GO:0009535	GO:0009543	GO:0009654	GO:0009773	GO:0009862	GO:0009867	GO:0009902	GO:0009965	GO:0010027	GO:0010205	GO:0010207	GO:0010242	GO:0010287	GO:0010310	GO:0010363	GO:0019761	GO:0019898	GO:0030003	GO:0030095	GO:0030096	GO:0030154	GO:0031348	GO:0035304	GO:0042549	GO:0042742	GO:0042793	GO:0045893	GO:0048046	GO:0070838
gi_351604161_gb_JP458514.1	GO:0000165	GO:0002376	GO:0004674	GO:0005516	GO:0005524	GO:0005634	GO:0005886	GO:0006468	GO:0006952	GO:0007154	GO:0009506	GO:0010150	GO:0046777	GO:0050789	GO:0051704
gi_351604165_gb_JP458518.1	GO:0003677	GO:0005515	GO:0005634	GO:0005737	GO:0006351	GO:0007165	GO:0009637	GO:0043565	GO:0071310
gi_351604202_gb_JP458555.1	GO:0005215	GO:0005515	GO:0005794	GO:0005886	GO:0006857	GO:0009414	GO:0009506	GO:0009611	GO:0009624	GO:0009705	GO:0009737	GO:0009751	GO:0009753	GO:0009860	GO:0010119	GO:0010167	GO:0015334	GO:0015824	GO:0015996	GO:0016021	GO:0016126	GO:0019761	GO:0030003	GO:0042538	GO:0042742	GO:0042936	GO:0042937	GO:0042938	GO:0042939	GO:0043201	GO:0046907	GO:0052541	GO:0052546	GO:0070838	GO:0080052	GO:0080053	GO:0080054	GO:0080055	GO:0080168	GO:0090440
gi_351604210_gb_JP458563.1	GO:0005783	GO:0005794	GO:0006508	GO:0008152	GO:0008237	GO:0009507	GO:0009850	GO:0010112	GO:0010178	GO:0016023	GO:0047980
gi_351604211_gb_JP458564.1	GO:0000023	GO:0005739	GO:0009409	GO:0009707	GO:0016023	GO:0019252	GO:0019761	GO:0043169	GO:0050826	GO:0080079
gi_351604266_gb_JP458619.1	GO:0004091	GO:0005737	GO:0009814	GO:0010033	GO:0010150	GO:0032787	GO:0033310	GO:0035560	GO:0042803	GO:0050789	GO:0070988	GO:0080030
gi_351604297_gb_JP458650.1	GO:0005507	GO:0005739	GO:0008447	GO:0009414	GO:0009809	GO:0009832	GO:0010413	GO:0016023	GO:0045492	GO:0046274	GO:0046688	GO:0048046	GO:0052716	GO:0055114
gi_351604320_gb_JP458672.1	GO:0005488	GO:0006952	GO:0044464
gi_351604400_gb_JP458752.1	GO:0005515	GO:0005634	GO:0005886	GO:0034613	GO:0050789
gi_351604401_gb_JP458753.1	GO:0005524	GO:0005768	GO:0005794	GO:0005886	GO:0006139	GO:0006200	GO:0008203	GO:0009414	GO:0009507	GO:0009737	GO:0009889	GO:0010148	GO:0010888	GO:0015248	GO:0015412	GO:0019218	GO:0019538	GO:0031323	GO:0032550	GO:0032559	GO:0033344	GO:0034369	GO:0042493	GO:0042626	GO:0043168	GO:0044446	GO:0044459	GO:0046907	GO:0046983	GO:0048518	GO:0050801	GO:0055088	GO:0072521	GO:0080168
gi_351604429_gb_JP458781.1	GO:0005886	GO:0015193	GO:0015824	GO:0016020	GO:0043090	GO:0050789	GO:0050896
gi_351604479_gb_JP458830.1	GO:0005515	GO:0005737	GO:0006612	GO:0006833	GO:0009611	GO:0009620	GO:0009651	GO:0009694	GO:0009696	GO:0009750	GO:0009862	GO:0009963	GO:0010363	GO:0016139	GO:0016298	GO:0016787	GO:0019344	GO:0046593	GO:0080030	GO:0080031	GO:0080032
gi_351604486_gb_JP458837.1	GO:0004185	GO:0005615	GO:0005773	GO:0006508	GO:0009505	GO:0009506	GO:0009742	GO:0016043
gi_351604509_gb_JP458860.1	GO:0005576	GO:0006629	GO:0010075	GO:0016787	GO:0045735
gi_351604570_gb_JP458921.1	GO:0000148	GO:0003843	GO:0005794	GO:0005886	GO:0006075	GO:0006612	GO:0006862	GO:0006888	GO:0006944	GO:0007623	GO:0009506	GO:0009556	GO:0009827	GO:0009846	GO:0009863	GO:0009870	GO:0009965	GO:0010150	GO:0010363	GO:0010584	GO:0015696	GO:0015802	GO:0016757	GO:0042742	GO:0043069	GO:0043090	GO:0043269	GO:0044425	GO:0050832	GO:0052543	GO:0052544	GO:0080092
gi_351604579_gb_JP458930.1	GO:0004497	GO:0005783	GO:0009653	GO:0009717	GO:0009958	GO:0016020	GO:0016705	GO:0021700	GO:0033770	GO:0046872	GO:0048364	GO:0048869	GO:0051554	GO:0080003	GO:0080004
gi_351604597_gb_JP458947.1	GO:0005618	GO:0005739	GO:0005774	GO:0005778	GO:0005794	GO:0005829	GO:0005886	GO:0006457	GO:0009408	GO:0009506	GO:0009570	GO:0009644	GO:0009651	GO:0009793	GO:0009941	GO:0016688	GO:0020037	GO:0042542	GO:0042744	GO:0046686	GO:0046872	GO:0055114
gi_351604599_gb_JP458949.1	GO:0000086	GO:0003682	GO:0003700	GO:0004597	GO:0005515	GO:0005634	GO:0006355	GO:0006950	GO:0008168	GO:0032259	GO:0042752	GO:0043167	GO:0045893	GO:0051716	GO:0051864	GO:0055114	GO:0070544
gi_351604650_gb_JP459000.1	GO:0000165	GO:0002679	GO:0004674	GO:0005576	GO:0005773	GO:0005886	GO:0006499	GO:0006612	GO:0006944	GO:0006979	GO:0009409	GO:0009506	GO:0009507	GO:0009611	GO:0009693	GO:0009697	GO:0009738	GO:0009862	GO:0009867	GO:0010200	GO:0010363	GO:0016036	GO:0016301	GO:0019375	GO:0030246	GO:0030968	GO:0031348	GO:0031625	GO:0042631	GO:0042742	GO:0043069	GO:0046777	GO:0050832
gi_351605075_gb_JP459422.1	GO:0000041	GO:0003712	GO:0005634	GO:0005737	GO:0005773	GO:0005886	GO:0006623	GO:0008429	GO:0009737	GO:0009744	GO:0009910	GO:0009911	GO:0010030	GO:0010229	GO:0031982	GO:0046685	GO:0048510	GO:0048575	GO:0090344
gi_351605183_gb_JP459530.1	GO:0003676	GO:0016772	GO:0044238	GO:0044260
gi_351605285_gb_JP459631.1	GO:0005358	GO:0005886	GO:0006457	GO:0006863	GO:0008506	GO:0009408	GO:0009506	GO:0009644	GO:0010167	GO:0015145	GO:0015706	GO:0015749	GO:0015770	GO:0016021	GO:0034219	GO:0034976	GO:0042542	GO:0043090
gi_351605549_gb_JP459893.1	GO:0005634	GO:0005783	GO:0008219	GO:0009966	GO:0012505	GO:0019899	GO:0030163	GO:0043234	GO:0044425	GO:0044446	GO:0048518	GO:0051246
gi_351605557_gb_JP459901.1	GO:0000023	GO:0000096	GO:0005506	GO:0005515	GO:0005886	GO:0006546	GO:0006636	GO:0006733	GO:0006766	GO:0006816	GO:0007030	GO:0008652	GO:0009072	GO:0009106	GO:0009108	GO:0009117	GO:0009269	GO:0009409	GO:0009535	GO:0009555	GO:0009570	GO:0009611	GO:0009617	GO:0009620	GO:0009644	GO:0009651	GO:0009693	GO:0009695	GO:0009737	GO:0009753	GO:0009873	GO:0009901	GO:0009941	GO:0010193	GO:0010200	GO:0015995	GO:0016117	GO:0016165	GO:0016166	GO:0019216	GO:0019252	GO:0019288	GO:0019748	GO:0022900	GO:0030003	GO:0031408	GO:0034440	GO:0040007	GO:0044272
gi_351605559_gb_JP459903.1	GO:0005789	GO:0006636	GO:0009409	GO:0016021	GO:0016717	GO:0016720	GO:0031969	GO:0042389	GO:0055114	GO:0080167
gi_351605568_gb_JP459912.1	GO:0000166	GO:0004672	GO:0004674	GO:0005515	GO:0006464	GO:0006950	GO:0007165	GO:0008544	GO:0009411	GO:0009617	GO:0009813	GO:0009886	GO:0010033	GO:0016020	GO:0016049	GO:0016310	GO:0030154	GO:0038023	GO:0043231	GO:0044444	GO:0048229	GO:0048507	GO:0048589	GO:0048610	GO:0048653	GO:0051179	GO:0071555	GO:0071944
gi_351605593_gb_JP459937.1	GO:0000271	GO:0005618	GO:0005634	GO:0005739	GO:0005886	GO:0007389	GO:0009825	GO:0009886	GO:0009887	GO:0009908	GO:0009932	GO:0010817	GO:0043234	GO:0043481	GO:0044430	GO:0045010	GO:0048507	GO:0048767	GO:0051015	GO:0051016	GO:0071555
gi_351605608_gb_JP459952.1	GO:0005215	GO:0005794	GO:0005886	GO:0006807	GO:0006857	GO:0009506	GO:0009611	GO:0009705	GO:0009753	GO:0009860	GO:0015334	GO:0016021	GO:0030001	GO:0042936	GO:0042937	GO:0042938	GO:0042939	GO:0044237	GO:0071704	GO:0080054	GO:0080055	GO:0080167	GO:0090408	GO:0090448	GO:0090449	GO:1901349
gi_351605615_gb_JP459959.1	GO:0006996	GO:0007275	GO:0044464	GO:0048856	GO:0050789	GO:0070647
gi_351605621_gb_JP459965.1	GO:0000235	GO:0000723	GO:0000902	GO:0003777	GO:0005524	GO:0005634	GO:0005813	GO:0005871	GO:0005874	GO:0005915	GO:0006260	GO:0006342	GO:0006793	GO:0006950	GO:0006952	GO:0007018	GO:0007019	GO:0007127	GO:0007601	GO:0008017	GO:0008283	GO:0008544	GO:0008569	GO:0008574	GO:0009524	GO:0009607	GO:0009723	GO:0009736	GO:0009792	GO:0009855	GO:0009971	GO:0010016	GO:0010094	GO:0010564	GO:0016020	GO:0016570	GO:0016887	GO:0016939	GO:0019752	GO:0030496	GO:0031047	GO:0042995	GO:0043414	GO:0044255	GO:0044262	GO:0045132	GO:0045218	GO:0051052	GO:0051258
gi_351605640_gb_JP459984.1	GO:0004793	GO:0006545	GO:0006567	GO:0008732	GO:0030170	GO:0042802	GO:0050179
gi_351605650_gb_JP459993.1	GO:0004965	GO:0004970	GO:0005217	GO:0005234	GO:0005262	GO:0005515	GO:0005576	GO:0006811	GO:0006816	GO:0006874	GO:0006875	GO:0007186	GO:0008066	GO:0009416	GO:0009506	GO:0009630	GO:0015276	GO:0016020	GO:0016021	GO:0030288	GO:0035235	GO:0045087	GO:0071230
gi_351605658_gb_JP460001.1	GO:0000922	GO:0003777	GO:0005524	GO:0005813	GO:0005871	GO:0005874	GO:0005876	GO:0005881	GO:0005886	GO:0007018	GO:0007052	GO:0007067	GO:0007275	GO:0008017	GO:0016939	GO:0019899	GO:0031023	GO:0042995	GO:0043231	GO:0043241	GO:0047496	GO:0048856	GO:0050794	GO:0050896	GO:0070925
gi_351605661_gb_JP460004.1	GO:0000023	GO:0005983	GO:0006470	GO:0008138	GO:0009570	GO:0019203	GO:0019252	GO:0030247	GO:0043036	GO:0043085
gi_351605728_gb_JP460071.1	GO:0004321	GO:0005777	GO:0006914	GO:0006952	GO:0009411	GO:0009507	GO:0009610	GO:0009611	GO:0009620	GO:0009695	GO:0009699	GO:0009851	GO:0016023	GO:0016207	GO:0033036	GO:0044238	GO:0050789
gi_351605735_gb_JP460078.1	GO:0008374	GO:0009699	GO:0009813	GO:0016410	GO:0016740	GO:0044238	GO:0050734	GO:0065007
gi_351605760_gb_JP460102.1	GO:0005741	GO:0007155	GO:0009507	GO:0009887	GO:0010090	GO:0010228	GO:0016926	GO:0019375	GO:0033044	GO:0043234	GO:0045010	GO:0048765	GO:0050665	GO:0071555
gi_351605787_gb_JP460129.1	GO:0005515	GO:0005634	GO:0009651	GO:0009788	GO:0009867	GO:0010581	GO:0045892	GO:0045893
gi_351605806_gb_JP460147.1	GO:0000785	GO:0005634	GO:0005730	GO:0005737	GO:0005886	GO:0006261	GO:0006306	GO:0006342	GO:0006461	GO:0007275	GO:0008270	GO:0009909	GO:0009965	GO:0010093	GO:0010314	GO:0016572	GO:0031047	GO:0032411	GO:0042800	GO:0042803	GO:0043984	GO:0044212	GO:0045322	GO:0045944	GO:0048188	GO:0051567	GO:0051568	GO:0070577	GO:0071339	GO:0080182	GO:2001040
gi_351605811_gb_JP460152.1	GO:0004674	GO:0005524	GO:0005634	GO:0005773	GO:0005777	GO:0005789	GO:0005829	GO:0005886	GO:0006468	GO:0006865	GO:0008104	GO:0009506	GO:0009627	GO:0009651	GO:0009697	GO:0009753	GO:0009789	GO:0009863	GO:0010035	GO:0010119	GO:0010359	GO:0016036	GO:0016044	GO:0019903	GO:0030968	GO:0031348	GO:0035556	GO:0043067	GO:0046777	GO:0046907	GO:0080092
gi_351605831_gb_JP460172.1	GO:0005886	GO:0006812	GO:0006855	GO:0015238	GO:0015297	GO:0042221	GO:0071702
gi_351605840_gb_JP460181.1	GO:0005765	GO:0008340	GO:0015181	GO:0015189	GO:0015809	GO:0015819	GO:0016020	GO:0031301	GO:0080144
gi_351605854_gb_JP460195.1	GO:0002238	GO:0005488	GO:0016020	GO:0016491	GO:0016709	GO:0043231	GO:0044444
gi_351605867_gb_JP460208.1	GO:0005215	GO:0005509	GO:0005515	GO:0005794	GO:0005886	GO:0005976	GO:0006807	GO:0006857	GO:0009414	GO:0009506	GO:0009611	GO:0009624	GO:0009664	GO:0009705	GO:0009737	GO:0009751	GO:0009753	GO:0009860	GO:0010119	GO:0010167	GO:0015112	GO:0015334	GO:0015706	GO:0030001	GO:0042538	GO:0042742	GO:0042936	GO:0042937	GO:0042938	GO:0042939	GO:0043201	GO:0044036	GO:0046907	GO:0080052	GO:0080053	GO:0080168	GO:0090440
gi_351605891_gb_JP460232.1	GO:0005488	GO:0005515	GO:0006457	GO:0009507
gi_351605912_gb_JP460252.1	GO:0006950	GO:0008152	GO:0009628	GO:0009685	GO:0010033	GO:0016491	GO:0019748	GO:0044249	GO:0045543	GO:0048731
gi_351605921_gb_JP460261.1	GO:0003824	GO:0004672	GO:0005515	GO:0005737	GO:0006464	GO:0006952	GO:0006955	GO:0007389	GO:0008544	GO:0009617	GO:0009755	GO:0009886	GO:0016020	GO:0016049	GO:0030154	GO:0032989	GO:0033993	GO:0034645	GO:0038023	GO:0045229	GO:0048443	GO:0048507	GO:0048610	GO:0048646	GO:0060560	GO:0097159	GO:0097305	GO:2000026
gi_351605938_gb_JP460277.1	GO:0005515	GO:0005524	GO:0005634	GO:0005829	GO:0006200	GO:0006457	GO:0006508	GO:0008233	GO:0009570	GO:0009644	GO:0009941	GO:0010286	GO:0016887	GO:0034605	GO:0034976	GO:0042542	GO:0043335	GO:0045727
gi_351605939_gb_JP460278.1	GO:0002215	GO:0004601	GO:0005515	GO:0005576	GO:0005774	GO:0005794	GO:0005829	GO:0005886	GO:0006979	GO:0009416	GO:0009505	GO:0009615	GO:0009651	GO:0009684	GO:0009723	GO:0009826	GO:0009908	GO:0020037	GO:0042742	GO:0042744	GO:0045926	GO:0046872	GO:0048046	GO:0050832	GO:0052033	GO:0055114
gi_351605968_gb_JP460306.1	GO:0005507	GO:0005576	GO:0006826	GO:0008447	GO:0009414	GO:0010106	GO:0010167	GO:0010228	GO:0015706	GO:0016023	GO:0046274	GO:0046688	GO:0048046	GO:0052716	GO:0055114
gi_351605979_gb_JP460317.1	GO:0004190	GO:0005576	GO:0005783	GO:0006508	GO:0006952	GO:0009414	GO:0009696	GO:0009737	GO:0031323	GO:0051707	GO:0051716	GO:0070001
gi_351606012_gb_JP460349.1	GO:0005515	GO:0005886	GO:0005938	GO:0006896	GO:0009059	GO:0009507	GO:0009628	GO:0009705	GO:0009734	GO:0009826	GO:0009834	GO:0009888	GO:0010015	GO:0016020	GO:0016070	GO:0032973	GO:0034639	GO:0043090	GO:0044249	GO:0051453	GO:0080144	GO:0080171	GO:0090355	GO:0090358
gi_351606020_gb_JP460357.1	GO:0000272	GO:0004553	GO:0004568	GO:0005615	GO:0005975	GO:0006032	GO:0009277	GO:0032506	GO:0036176	GO:0042594	GO:0043231	GO:0044182	GO:0044444	GO:0051716
gi_351606050_gb_JP460387.1	GO:0005618	GO:0009056	GO:0016043	GO:0019222	GO:0030599	GO:0033554	GO:0042546	GO:0045491
gi_351606055_gb_JP460391.1	GO:0005488
gi_351606118_gb_JP460452.1	GO:0005886	GO:0006855	GO:0009636	GO:0009705	GO:0009723	GO:0010023	GO:0010231	GO:0015238	GO:0015297	GO:0015299	GO:0015691	GO:0016020	GO:0051238	GO:0071702
gi_351606123_gb_JP460457.1	GO:0006950	GO:0008970	GO:0009411	GO:0010187	GO:0019915	GO:0043231	GO:0044444	GO:0046340	GO:0046394	GO:0047372	GO:0051716	GO:0052651
gi_351606133_gb_JP460466.1	GO:0006807	GO:0007275	GO:0009813	GO:0016410	GO:0016413	GO:0016740	GO:0044238	GO:0044249	GO:0048856
gi_351606158_gb_JP460491.1	GO:0000122	GO:0003700	GO:0005515	GO:0006338	GO:0006950	GO:0007596	GO:0009414	GO:0009651	GO:0009723	GO:0009725	GO:0009733	GO:0009737	GO:0009739	GO:0009790	GO:0010200	GO:0016363	GO:0031523	GO:0042742	GO:0045624	GO:0045944	GO:0046686	GO:0050832	GO:0051571	GO:0051574	GO:0090307	GO:2000022	GO:2000031
gi_351606227_gb_JP460556.1	GO:0005515	GO:0005634	GO:0005886	GO:0034613	GO:0050789
gi_351606239_gb_JP460568.1	GO:0022414	GO:0032501	GO:0043231	GO:0043234	GO:0048523	GO:0048856	GO:0050896
gi_351606318_gb_JP460647.1	GO:0005739	GO:0006457	GO:0009507	GO:0009644	GO:0010286	GO:0042542	GO:0045471	GO:0046685	GO:0046686	GO:0046688	GO:0051260
gi_351606384_gb_JP460712.1	GO:0005634	GO:0005737	GO:0006012	GO:0009408	GO:0009409	GO:0009644	GO:0009651	GO:0009737	GO:0010325	GO:0016051	GO:0042542	GO:0046872	GO:0047216	GO:0052576	GO:0070417	GO:0071465
gi_351606412_gb_JP460740.1	GO:0005451	GO:0005515	GO:0005794	GO:0005886	GO:0006814	GO:0006885	GO:0010008	GO:0010351	GO:0015385	GO:0016021	GO:0035725	GO:0044425	GO:0046873	GO:0055037	GO:0055075	GO:0055085
gi_351606529_gb_JP460856.1	GO:0005886	GO:0006855	GO:0009705	GO:0010023	GO:0010231	GO:0015238	GO:0015297	GO:0015299	GO:0015691	GO:0015893	GO:0031348	GO:0046685	GO:0051238	GO:0055085	GO:0071702
gi_351606711_gb_JP461037.1	GO:0000070	GO:0000166	GO:0000777	GO:0000919	GO:0003777	GO:0005634	GO:0005737	GO:0005874	GO:0005875	GO:0005886	GO:0007017	GO:0007112	GO:0007389	GO:0008608	GO:0009506	GO:0009524	GO:0009555	GO:0009558	GO:0010245	GO:0010638	GO:0010970	GO:0016939	GO:0017048	GO:0030071	GO:0031514	GO:0042384	GO:0043515	GO:0045184	GO:0045860	GO:0050896	GO:0051303	GO:0051984	GO:0090307
gi_351606714_gb_JP461040.1	GO:0000325	GO:0002679	GO:0004575	GO:0005576	GO:0005618	GO:0005886	GO:0005982	GO:0005985	GO:0005987	GO:0006598	GO:0006816	GO:0006826	GO:0006865	GO:0007030	GO:0009505	GO:0009611	GO:0009617	GO:0009651	GO:0009805	GO:0010106	GO:0010167	GO:0010200	GO:0015706	GO:0016021	GO:0016132	GO:0033881	GO:0042398	GO:0050306	GO:0051669	GO:0071370	GO:0071836	GO:0080167
gi_351606724_gb_JP461050.1	GO:0003677	GO:0005576	GO:0006725	GO:0006952	GO:0008233	GO:0009628	GO:0009725	GO:0010035	GO:0016020	GO:0043231	GO:0043436	GO:0044444	GO:0050794	GO:0051707	GO:0051716	GO:0070001
gi_351606794_gb_JP461119.1	GO:0008152	GO:0016787
gi_351606808_gb_JP461133.1	GO:0004630	GO:0005509	GO:0005515	GO:0005546	GO:0005886	GO:0006643	GO:0006979	GO:0009414	GO:0009506	GO:0009651	GO:0009737	GO:0009793	GO:0009816	GO:0009941	GO:0010044	GO:0016042	GO:0034638	GO:0046466	GO:0046470	GO:0046686	GO:0070290
gi_351606826_gb_JP461151.1	GO:0003987	GO:0005739	GO:0005777	GO:0006083	GO:0006097	GO:0008756	GO:0009507	GO:0009686	GO:0009740	GO:0015996	GO:0016208	GO:0018858	GO:0019605	GO:0019761	GO:0047760
gi_351606834_gb_JP461159.1	GO:0001666	GO:0005576	GO:0005794	GO:0009505	GO:0009612	GO:0040007
gi_351606867_gb_JP461192.1	GO:0003006	GO:0003676	GO:0006950	GO:0007165	GO:0007275	GO:0009416	GO:0009725	GO:0044238	GO:0044249	GO:0044260	GO:0048856
gi_351606880_gb_JP461205.1	GO:0009073	GO:0009507	GO:0016226	GO:0042819
gi_351606881_gb_JP461206.1	GO:0005457	GO:0005459	GO:0005460	GO:0005768	GO:0005794	GO:0005802	GO:0005886	GO:0006486	GO:0006863	GO:0006944	GO:0009507	GO:0009624	GO:0015783	GO:0015786	GO:0016021	GO:0048193	GO:0072334
gi_351606900_gb_JP461225.1	GO:0000326	GO:0005886	GO:0006096	GO:0006598	GO:0006816	GO:0006826	GO:0006833	GO:0006972	GO:0007030	GO:0009269	GO:0009409	GO:0009505	GO:0009507	GO:0009651	GO:0009698	GO:0009705	GO:0009737	GO:0009740	GO:0009941	GO:0010106	GO:0010167	GO:0010413	GO:0015200	GO:0015204	GO:0015250	GO:0015706	GO:0016021	GO:0016023	GO:0042398	GO:0042807	GO:0045492	GO:0046686	GO:0051739	GO:0071918	GO:0072489	GO:0080170
gi_351606914_gb_JP461239.1	GO:0005351	GO:0005366	GO:0005886	GO:0006863	GO:0009705	GO:0015517	GO:0015757	GO:0015798	GO:0016021	GO:0023052	GO:0032440	GO:0034219	GO:0055114	GO:0090406
gi_351606916_gb_JP461241.1	GO:0003700	GO:0005515	GO:0005634	GO:0005737	GO:0006865	GO:0006952	GO:0007165	GO:0008270	GO:0009409	GO:0009607	GO:0009617	GO:0009624	GO:0009651	GO:0009718	GO:0009733	GO:0009863	GO:0010243	GO:0016043	GO:0019438	GO:0022414	GO:0031323	GO:0031668	GO:0032107	GO:0033036	GO:0043565	GO:0043620	GO:0045087	GO:0045893	GO:0048527	GO:0051704	GO:0070370
gi_351606971_gb_JP461295.1	GO:0003677	GO:0004518	GO:0005515	GO:0005634	GO:0006281	GO:0006298	GO:0006310	GO:0016893	GO:0034645	GO:0045145	GO:0048256	GO:0051908	GO:0090305
gi_351607001_gb_JP461325.1	GO:0005829	GO:0006612	GO:0008270	GO:0009611	GO:0009805	GO:0009809	GO:0009963	GO:0010363	GO:0015824	GO:0045551	GO:0052747	GO:0055114	GO:0080167
gi_351607042_gb_JP461366.1	GO:0005576	GO:0006979
gi_351607499_gb_JP461820.1	GO:0003677	GO:0003700	GO:0005515	GO:0005634	GO:0006355	GO:0008284	GO:0009691	GO:0009733	GO:0009942	GO:0010072	GO:0010654	GO:0030010	GO:0043565	GO:0048825	GO:0080167
gi_351607554_gb_JP461874.1	GO:0005634	GO:0006457	GO:0009408	GO:0009414	GO:0009644	GO:0009651	GO:0009738	GO:0010029	GO:0010228	GO:0042542
gi_351607577_gb_JP461897.1	GO:0006950	GO:0009526	GO:0009628	GO:0009695	GO:0016020	GO:0044434	GO:0046423
gi_351607607_gb_JP461927.1	GO:0005794	GO:0005886	GO:0009505	GO:0009506	GO:0009834	GO:0031225	GO:0040007	GO:0046658	GO:0048513	GO:0065007	GO:0071704	GO:0071840
gi_351607655_gb_JP461975.1	GO:0005576	GO:0009506	GO:0045735
gi_351607809_gb_JP462124.1	GO:0005488	GO:0005506	GO:0006950	GO:0009055	GO:0009647	GO:0009687	GO:0009826	GO:0009911	GO:0010224	GO:0010268	GO:0010584	GO:0016020	GO:0016023	GO:0016132	GO:0016709	GO:0020037	GO:0048366	GO:0048441	GO:0048657	GO:0050597	GO:0055114
gi_351608058_gb_JP462369.1	GO:0000166	GO:0004568	GO:0004675	GO:0005576	GO:0005634	GO:0005773	GO:0005886	GO:0005975	GO:0006032	GO:0009506	GO:0009751	GO:0012501	GO:0016772	GO:0030246	GO:0031625	GO:0042742	GO:0046777	GO:0048544
gi_351608158_gb_JP462468.1	GO:0005488	GO:0016772
gi_351608234_gb_JP462544.1	GO:0000165	GO:0005515	GO:0005737	GO:0006355	GO:0006612	GO:0009055	GO:0009409	GO:0009410	GO:0009414	GO:0009611	GO:0009693	GO:0009695	GO:0009723	GO:0009733	GO:0009738	GO:0009862	GO:0009867	GO:0010033	GO:0010310	GO:0010363	GO:0015035	GO:0016491	GO:0030968	GO:0031348	GO:0035304	GO:0042538	GO:0042742	GO:0043069	GO:0043231	GO:0045454	GO:0048653	GO:0050832
gi_351608289_gb_JP462597.1	GO:0005886	GO:0006855	GO:0015238	GO:0015297	GO:0015299	GO:0015893	GO:0016020	GO:0031348	GO:0043226	GO:0044464	GO:0046685	GO:0055085	GO:0071702
gi_351608298_gb_JP462606.1	GO:0000271	GO:0004723	GO:0005509	GO:0005513	GO:0005515	GO:0005737	GO:0005886	GO:0005955	GO:0009409	GO:0009414	GO:0009507	GO:0009705	GO:0009825	GO:0009932	GO:0010107	GO:0010118	GO:0010817	GO:0019722	GO:0022626	GO:0030007	GO:0032578	GO:0042538	GO:0042539	GO:0043266	GO:0043481	GO:0048767	GO:0071555	GO:2000021
gi_351608337_gb_JP462644.1	GO:0002213	GO:0004568	GO:0005199	GO:0005515	GO:0005576	GO:0005634	GO:0005886	GO:0006032	GO:0009505	GO:0009506	GO:0009664	GO:0009860	GO:0016301	GO:0048527	GO:0048767	GO:0071554
gi_351608374_gb_JP462681.1	GO:0005794	GO:0005886	GO:0009505	GO:0009506	GO:0009834	GO:0009987	GO:0031225	GO:0046658	GO:0071704
gi_351608416_gb_JP462723.1	GO:0000302	GO:0005739	GO:0009648	GO:0009706	GO:0048366
gi_351608433_gb_JP462740.1	GO:0005515	GO:0005576	GO:0005739	GO:0005768	GO:0005794	GO:0005802	GO:0006857	GO:0009808	GO:0009834	GO:0010054	GO:0010413	GO:0030775	GO:0045492
gi_351608633_gb_JP462938.1	GO:0016020
gi_351608706_gb_JP463010.1	GO:0004430	GO:0005546	GO:0005886	GO:0006468	GO:0009506	GO:0032266	GO:0035004	GO:0043325	GO:0046854	GO:0048015	GO:0048471	GO:0051015	GO:0070273	GO:0070300
gi_351609027_gb_JP463328.1	GO:0006950	GO:0009628
gi_351609218_gb_JP463519.1	GO:0005886	GO:0009506	GO:0044238	GO:0071458	GO:0071704	GO:0071782	GO:0071786	GO:0080167
gi_351609227_gb_JP463528.1	GO:0004416	GO:0005829	GO:0006623	GO:0006750	GO:0008270	GO:0019243	GO:0019288
gi_351609231_gb_JP463532.1	GO:0005829
gi_351609416_gb_JP463717.1	GO:0003700	GO:0005515	GO:0005634	GO:0006355	GO:0007165	GO:0009410	GO:0009725	GO:0030968	GO:0043565	GO:0045893	GO:0048518	GO:0050793	GO:0071310
gi_351609629_gb_JP463930.1	GO:0000394	GO:0002679	GO:0004674	GO:0004714	GO:0005515	GO:0005524	GO:0005730	GO:0005886	GO:0006468	GO:0006612	GO:0006865	GO:0009086	GO:0009506	GO:0009507	GO:0009627	GO:0009697	GO:0009816	GO:0009863	GO:0010200	GO:0010363	GO:0032880	GO:0043069	GO:0046777	GO:0048765	GO:0050832	GO:0051510	GO:0052033
gi_351609883_gb_JP464184.1	GO:0005515	GO:0005634	GO:0006950	GO:0009937	GO:0010265	GO:0019005	GO:0031146	GO:0048831
gi_351609944_gb_JP464245.1	GO:0030247
gi_351610040_gb_JP464341.1	GO:0002238	GO:0004842	GO:0005634	GO:0005886	GO:0006796	GO:0007165	GO:0009617	GO:0009627	GO:0009653	GO:0010200	GO:0010467	GO:0016043	GO:0016070	GO:0022626	GO:0031323	GO:0031347	GO:0033554	GO:0034645	GO:0034654	GO:0043068	GO:0044446	GO:0046872	GO:0046907	GO:0048513	GO:0051865	GO:0060255	GO:0071310	GO:0080090	GO:1901137
gi_351610043_gb_JP464344.1	GO:0003676	GO:0016772	GO:0044238	GO:0044260
gi_351610097_gb_JP464398.1	GO:0005886	GO:0006950	GO:0031225	GO:0042221	GO:0043231	GO:0044238	GO:0044444	GO:0071704
gi_351610148_gb_JP464449.1	GO:0005737	GO:0005829	GO:0006457	GO:0006972	GO:0009408	GO:0009644	GO:0010286	GO:0034976	GO:0042542	GO:0045471	GO:0046685	GO:0046686	GO:0046688	GO:0051082
gi_351610418_gb_JP464719.1	GO:0003824
gi_351610521_gb_JP464822.1	GO:0000976	GO:0003700	GO:0005634	GO:0009269	GO:0009409	GO:0009414	GO:0009615	GO:0009637	GO:0009651	GO:0009738	GO:0009788	GO:0009965	GO:0010228	GO:0042744	GO:0042803	GO:0043565	GO:0045893	GO:0048497
gi_351610538_gb_JP464839.1	GO:0004721
gi_351610757_gb_JP465058.1	GO:0005634
gi_351610844_gb_JP465145.1	GO:0005886	GO:0016021
gi_351610930_gb_JP465231.1	GO:0003676	GO:0003700	GO:0005634	GO:0006355	GO:0008270	GO:0009736	GO:0009740	GO:0009909	GO:0010026	GO:0010582	GO:0022626
gi_351610988_gb_JP465289.1	GO:0000325	GO:0005215	GO:0005886	GO:0006810	GO:0006950	GO:0009507	GO:0009628	GO:0010035	GO:0016021	GO:0044237	GO:0044238	GO:0044446	GO:0071704
gi_351611219_gb_JP465520.1	GO:0005199	GO:0005576	GO:0005829	GO:0006949	GO:0009505	GO:0009506	GO:0009507	GO:0009664	GO:0009739	GO:0009826	GO:0009828	GO:0009831	GO:0010114	GO:0010119	GO:0016020	GO:0016023	GO:0046685
gi_351611228_gb_JP465529.1	GO:0005773	GO:0009507	GO:0019761	GO:0032578	GO:0044238	GO:0046658	GO:0046872	GO:0048046
gi_351611280_gb_JP465581.1	GO:0000023	GO:0006098	GO:0009535	GO:0009817	GO:0009941	GO:0010207	GO:0010258	GO:0010598	GO:0016020	GO:0016117	GO:0016556	GO:0016655	GO:0019252	GO:0043085	GO:0044464
gi_351611286_gb_JP465587.1	GO:0009535	GO:0009902	GO:0009965	GO:0010027	GO:0016117	GO:0016301	GO:0016773	GO:0030154	GO:0034660	GO:0042793	GO:0046474
gi_351611328_gb_JP465629.1	GO:0005515	GO:0009987	GO:0016787	GO:0044238	GO:0071704	GO:0071944
gi_351611351_gb_JP465652.1	GO:0001818	GO:0001953	GO:0005215	GO:0005576	GO:0005739	GO:0005774	GO:0005783	GO:0005794	GO:0005829	GO:0005886	GO:0006629	GO:0006810	GO:0006974	GO:0008289	GO:0009408	GO:0009409	GO:0009416	GO:0009506	GO:0009611	GO:0016043	GO:0032879	GO:0033036	GO:0036094	GO:0042221	GO:0042538	GO:0044444	GO:0048583	GO:0048731	GO:0071702
gi_351611353_gb_JP465654.1	GO:0000165	GO:0000302	GO:0006612	GO:0009409	GO:0009507	GO:0009611	GO:0009738	GO:0009790	GO:0009862	GO:0009867	GO:0010363	GO:0016036	GO:0019375	GO:0030968	GO:0031348	GO:0042631	GO:0043069	GO:0050832
gi_351611422_gb_JP465723.1	GO:0005886	GO:0006364	GO:0009535	GO:0009538	GO:0009657	GO:0009941	GO:0010207	GO:0010287	GO:0019344	GO:0030003	GO:0033115	GO:0070838
gi_351611450_gb_JP465751.1	GO:0002213	GO:0004568	GO:0005515	GO:0005576	GO:0005737	GO:0006032	GO:0009505	GO:0018024	GO:0035097	GO:0043232	GO:0044238	GO:0044260	GO:0048364	GO:0048869	GO:0050794	GO:0051716	GO:0071840	GO:0097159
gi_351611463_gb_JP465764.1	GO:0009773	GO:0009780	GO:0009941	GO:0016021	GO:0016168	GO:0019344	GO:0030003	GO:0030093	GO:0042550	GO:0050821	GO:0070838
gi_351611514_gb_JP465815.1	GO:0005576	GO:0006869	GO:0008289
gi_351611524_gb_JP465825.1	GO:0005199	GO:0005576	GO:0005829	GO:0006949	GO:0009505	GO:0009506	GO:0009507	GO:0009664	GO:0009739	GO:0009826	GO:0009828	GO:0009831	GO:0010114	GO:0010119	GO:0016020	GO:0016023	GO:0046685
gi_351611558_gb_JP465859.1	GO:0005576	GO:0005618	GO:0006949	GO:0009506	GO:0009826	GO:0009828	GO:0016020	GO:0016023	GO:0019953
gi_351611561_gb_JP465862.1	GO:0005618	GO:0006869	GO:0006952	GO:0008289	GO:0009409	GO:0009414	GO:0009607	GO:0009737	GO:0042538	GO:0048046	GO:0051704
gi_351611595_gb_JP465896.1	GO:0005315	GO:0005355	GO:0005739	GO:0006007	GO:0006863	GO:0007033	GO:0009528	GO:0009534	GO:0009553	GO:0009624	GO:0009643	GO:0009670	GO:0009718	GO:0009790	GO:0009941	GO:0010152	GO:0015120	GO:0015121	GO:0015152	GO:0015297	GO:0015713	GO:0015714	GO:0015760	GO:0016021	GO:0019344	GO:0019684	GO:0031969	GO:0034389	GO:0035304	GO:0035436	GO:0071917
gi_351611611_gb_JP465912.1	GO:0010089	GO:0044036
gi_351611618_gb_JP465919.1	GO:0006364	GO:0009533	GO:0009657	GO:0010207	GO:0016021	GO:0019344	GO:0030095	GO:0030145	GO:0035304
gi_351611624_gb_JP465925.1	GO:0000271	GO:0005576	GO:0005618	GO:0006073	GO:0007389	GO:0008361	GO:0009505	GO:0009506	GO:0009507	GO:0009612	GO:0009645	GO:0009733	GO:0009825	GO:0009926	GO:0009932	GO:0010411	GO:0016020	GO:0016126	GO:0016762	GO:0033946	GO:0043481	GO:0048046	GO:0048767	GO:0071555	GO:0080039
gi_351611666_gb_JP465967.1	GO:0000226	GO:0000278	GO:0000911	GO:0005515	GO:0005634	GO:0005635	GO:0005886	GO:0006886	GO:0006928	GO:0007275	GO:0009507	GO:0009850	GO:0015630	GO:0016740	GO:0016787	GO:0022402	GO:0022607	GO:0030029	GO:0032386	GO:0033043	GO:0033554	GO:0043234	GO:0044260	GO:0044425	GO:0044430	GO:0044444	GO:0048518	GO:0048523	GO:0048856	GO:0050658	GO:0051168	GO:0051170	GO:0071822	GO:0090304	GO:0090404	GO:2000012
gi_351611704_gb_JP466005.1	GO:0006364	GO:0009534	GO:0009535	GO:0009657	GO:0010103	GO:0010207	GO:0016020	GO:0035304	GO:0043085
gi_351611734_gb_JP466035.1	GO:0000023	GO:0004364	GO:0004462	GO:0004601	GO:0005634	GO:0005737	GO:0005774	GO:0005794	GO:0005829	GO:0005886	GO:0006094	GO:0006096	GO:0006569	GO:0006635	GO:0006749	GO:0006979	GO:0009407	GO:0009409	GO:0009570	GO:0009635	GO:0009651	GO:0009684	GO:0009734	GO:0010583	GO:0015824	GO:0016036	GO:0019252	GO:0019375	GO:0019899	GO:0042631	GO:0043085	GO:0043161	GO:0043295	GO:0046686	GO:0048046	GO:0051788	GO:0080129	GO:0080167	GO:2000030
gi_351611767_gb_JP466068.1	GO:0005515	GO:0009941	GO:0016044	GO:0045087	GO:0051707	GO:0070727
gi_351611783_gb_JP466084.1	GO:0005743	GO:0006839	GO:0016021	GO:0055085
gi_351611853_gb_JP466154.1	GO:0000041	GO:0000213	GO:0000214	GO:0004792	GO:0005515	GO:0006388	GO:0006820	GO:0006979	GO:0007154	GO:0007568	GO:0009507	GO:0009611	GO:0009744	GO:0009750	GO:0009753	GO:0009888	GO:0016020	GO:0019222	GO:0050794	GO:0051716	GO:0065009
gi_351611914_gb_JP466215.1	GO:0003677	GO:0003700	GO:0005515	GO:0005654	GO:0006366	GO:0009414	GO:0009567	GO:0009738	GO:0009785	GO:0010262	GO:0016036	GO:0016602	GO:0019375	GO:0044281	GO:0045892	GO:0045893	GO:0048510	GO:0055046
gi_351611917_gb_JP466218.1	GO:0005618	GO:0005774	GO:0006084	GO:0006816	GO:0007030	GO:0007389	GO:0008361	GO:0009505	GO:0009651	GO:0009664	GO:0009832	GO:0009926	GO:0016126	GO:0016132	GO:0046658	GO:0048046	GO:0048364	GO:0048367	GO:0048767
gi_351611952_gb_JP466253.1	GO:0003700	GO:0005634	GO:0009414	GO:0009536	GO:0009615	GO:0009630	GO:0009637	GO:0009651	GO:0009787	GO:0009965	GO:0010167	GO:0010228	GO:0015706	GO:0015996	GO:0042803	GO:0043565	GO:0045893
gi_351612000_gb_JP466301.1	GO:0003700	GO:0005515	GO:0005622	GO:0005730	GO:0005886	GO:0006355	GO:0007623	GO:0008270	GO:0009611	GO:0009637	GO:0009641	GO:0009644	GO:0009658	GO:0009744	GO:0009805	GO:0009909	GO:0009963	GO:0010018	GO:0010099	GO:0010155	GO:0010161	GO:0010223	GO:0010224	GO:0010229	GO:0032880	GO:0045892	GO:0045893	GO:0048576	GO:0048579
gi_351612001_gb_JP466302.1	GO:0000271	GO:0001736	GO:0003333	GO:0005768	GO:0005794	GO:0005886	GO:0006084	GO:0006949	GO:0007155	GO:0007389	GO:0008361	GO:0009624	GO:0009723	GO:0009734	GO:0009825	GO:0009926	GO:0009932	GO:0009958	GO:0009986	GO:0010011	GO:0010075	GO:0010090	GO:0010218	GO:0010311	GO:0010328	GO:0010583	GO:0010588	GO:0015171	GO:0015293	GO:0016021	GO:0016126	GO:0016132	GO:0043481	GO:0045010	GO:0048767	GO:0048829	GO:0060919	GO:0071555
gi_351612036_gb_JP466337.1	GO:0005634	GO:0005783	GO:0005789	GO:0006629	GO:0006636	GO:0009409	GO:0016021	GO:0016717	GO:0016720	GO:0031969	GO:0042389	GO:0045485	GO:0055114	GO:0080167
gi_351612043_gb_JP466344.1	GO:0005739	GO:0009409	GO:0009414	GO:0009737	GO:0042538
gi_351612055_gb_JP466356.1	GO:0005634	GO:0080167
gi_351612089_gb_JP466390.1	GO:0000271	GO:0004674	GO:0004715	GO:0005524	GO:0005576	GO:0005886	GO:0006468	GO:0006612	GO:0007020	GO:0007169	GO:0007267	GO:0009556	GO:0009560	GO:0009616	GO:0009664	GO:0009736	GO:0009742	GO:0009825	GO:0009855	GO:0009887	GO:0009932	GO:0009944	GO:0009963	GO:0010014	GO:0010051	GO:0010075	GO:0010150	GO:0010152	GO:0010267	GO:0010363	GO:0010817	GO:0016021	GO:0033612	GO:0035196	GO:0043481	GO:0044264	GO:0048439	GO:0048653	GO:0048767
gi_351612131_gb_JP466432.1	GO:0000023	GO:0008937	GO:0009570	GO:0009941	GO:0019252	GO:0030385	GO:0043085	GO:0046872	GO:0051539	GO:0055114
gi_351612133_gb_JP466434.1	GO:0001708	GO:0003677	GO:0003700	GO:0005515	GO:0005634	GO:0006355	GO:0009062	GO:0009855	GO:0009887	GO:0009944	GO:0010014	GO:0010051	GO:0010073	GO:0043565	GO:0048439	GO:0048440	GO:0048519	GO:2000026
gi_351612153_gb_JP466454.1	GO:0000271	GO:0005576	GO:0007389	GO:0008361	GO:0009814	GO:0009926	GO:0009932	GO:0016020	GO:0030570	GO:0042547	GO:0043481	GO:0045490	GO:0046658	GO:0046872	GO:0048767
gi_351612161_gb_JP466462.1	GO:0004601	GO:0005515	GO:0005829	GO:0005886	GO:0006364	GO:0006979	GO:0008379	GO:0009533	GO:0009535	GO:0009941	GO:0010287	GO:0015995	GO:0016117	GO:0019344	GO:0019761	GO:0032843	GO:0051920	GO:0055114
gi_351612179_gb_JP466480.1	GO:0005634	GO:0005829	GO:0005886	GO:0006598	GO:0008171	GO:0009506	GO:0009611	GO:0009805	GO:0009809	GO:0009963	GO:0016126	GO:0030744	GO:0030755	GO:0032259	GO:0033799	GO:0042398	GO:0046983	GO:0047763	GO:0051555
gi_351612233_gb_JP466534.1	GO:0005515	GO:0005887	GO:0006816	GO:0006825	GO:0007030	GO:0008515	GO:0009536	GO:0009555	GO:0009651	GO:0009901	GO:0010150	GO:0015770	GO:0016023	GO:0030003	GO:0042742	GO:0071215	GO:0071446	GO:0071470
gi_351612251_gb_JP466552.1	GO:0005524	GO:0005983	GO:0009570	GO:0009664	GO:0019200	GO:0019252	GO:0046777	GO:0046835	GO:0046872	GO:0051752	GO:2001070
gi_351612265_gb_JP466566.1	GO:0000041	GO:0005576	GO:0005634	GO:0005737	GO:0006005	GO:0007154	GO:0009409	GO:0009505	GO:0010103	GO:0019684	GO:0019853	GO:0030003	GO:0031012	GO:0042221	GO:0046872	GO:0048046	GO:0050162	GO:0050577	GO:0050829	GO:0050830	GO:0050832	GO:0051716	GO:0065007	GO:0070838
gi_351612279_gb_JP466580.1	GO:0043231	GO:0044444
gi_351612398_gb_JP466699.1	GO:0005739	GO:0005743	GO:0006839	GO:0016021	GO:0055085
gi_351612403_gb_JP466704.1	GO:0009987
gi_351612408_gb_JP466709.1	GO:0006364	GO:0009503	GO:0009521	GO:0009535	GO:0009637	GO:0009644	GO:0009744	GO:0009765	GO:0009941	GO:0010114	GO:0010155	GO:0010218	GO:0010287	GO:0016168	GO:0019344	GO:0030076	GO:0035304	GO:0046872
gi_351612444_gb_JP466745.1	GO:0005739	GO:0016020
gi_351612451_gb_JP466752.1	GO:0005634	GO:0006005	GO:0006857	GO:0009409	GO:0009505	GO:0009734	GO:0010103	GO:0016023	GO:0019684	GO:0019853	GO:0030003	GO:0030145	GO:0031012	GO:0031640	GO:0045735	GO:0048046	GO:0050162	GO:0050577	GO:0050829	GO:0050830	GO:0050832	GO:0070838
gi_351612456_gb_JP466757.1	GO:0005737	GO:0006457	GO:0006950	GO:0009644	GO:0010286	GO:0034976	GO:0042542	GO:0045471	GO:0046685	GO:0046686	GO:0046688	GO:0051259
gi_351612464_gb_JP466765.1	GO:0000023	GO:0000096	GO:0006098	GO:0006546	GO:0006636	GO:0006655	GO:0006766	GO:0008652	GO:0009072	GO:0009106	GO:0009108	GO:0009416	GO:0009570	GO:0009695	GO:0015995	GO:0016117	GO:0016853	GO:0019216	GO:0019252	GO:0019288	GO:0019761	GO:0030604	GO:0031408	GO:0042744	GO:0043085	GO:0046686	GO:0046872	GO:0070402
gi_351612481_gb_JP466782.1	GO:0008146	GO:0009812	GO:0044424
gi_351612482_gb_JP466783.1	GO:0005576	GO:0031224
gi_351612489_gb_JP466790.1	GO:0003779	GO:0003785	GO:0004349	GO:0004350	GO:0005634	GO:0005737	GO:0005856	GO:0006457	GO:0006561	GO:0007015	GO:0009408	GO:0009524	GO:0009644	GO:0015629	GO:0016310	GO:0030036	GO:0042542	GO:0048046	GO:0050661	GO:0055114
gi_351612557_gb_JP466858.1	GO:0003677	GO:0003700	GO:0005515	GO:0005634	GO:0009410	GO:0009414	GO:0009686	GO:0009725	GO:0009737	GO:0009740	GO:0009793	GO:0009845	GO:0010162	GO:0033993	GO:0045893
gi_351612621_gb_JP466922.1	GO:0000085	GO:0005886	GO:0006487	GO:0006499	GO:0009640	GO:0010388	GO:0016567	GO:0016571	GO:0016579	GO:0045893
gi_351612622_gb_JP466923.1	GO:0000023	GO:0005524	GO:0005739	GO:0006098	GO:0006364	GO:0009570	GO:0009902	GO:0010027	GO:0015979	GO:0015995	GO:0016117	GO:0016226	GO:0019252	GO:0019288	GO:0032981	GO:0043085	GO:0051539	GO:0070584
gi_351612717_gb_JP467018.1	GO:0005634	GO:0006417	GO:0006970	GO:0009414	GO:0009506	GO:0009605	GO:0009733	GO:0009755	GO:0009880	GO:0009987	GO:0010051	GO:0010102	GO:0016043	GO:0016049	GO:0030154	GO:0044444	GO:0045087	GO:0045892	GO:0046983	GO:0065008
gi_351612754_gb_JP467055.1	GO:0005943	GO:0009534
gi_351612765_gb_JP467066.1	GO:0003735	GO:0005840	GO:0006412
gi_351612777_gb_JP467078.1	GO:0002679	GO:0003700	GO:0005515	GO:0005730	GO:0005737	GO:0006351	GO:0006406	GO:0009220	GO:0009407	GO:0009611	GO:0009640	GO:0009694	GO:0009736	GO:0009737	GO:0009751	GO:0009753	GO:0009845	GO:0009873	GO:0009909	GO:0009933	GO:0010017	GO:0010162	GO:0010182	GO:0010200	GO:0010228	GO:0010260	GO:0010564	GO:0010583	GO:0016567	GO:0019915	GO:0035556	GO:0042991	GO:0043565	GO:0045595	GO:0045893	GO:0046482	GO:0048825	GO:0051301	GO:0071472	GO:0071497	GO:2000070
gi_351612813_gb_JP467114.1	GO:0005576	GO:0016023
gi_351612824_gb_JP467125.1	GO:0030001	GO:0046872
gi_351612830_gb_JP467131.1	GO:0003677	GO:0005634	GO:0009414	GO:0009615	GO:0009651	GO:0009737	GO:0045893
gi_351612840_gb_JP467141.1	GO:0000166	GO:0005829	GO:0009854	GO:0016618	GO:0030267	GO:0047964	GO:0047995	GO:0050662	GO:0051287	GO:0055114
gi_351612852_gb_JP467153.1	GO:0003676	GO:0005488	GO:0005634	GO:0006826	GO:0010075	GO:0010106	GO:0010167	GO:0010260	GO:0015706	GO:0042803	GO:0045604	GO:0045893	GO:0048510	GO:0048527	GO:0048573	GO:0048765	GO:0051302
gi_351612874_gb_JP467175.1	GO:0000003	GO:0005576	GO:0016746	GO:0016788	GO:0019761
gi_351612890_gb_JP467191.1	GO:0003677	GO:0003682	GO:0003700	GO:0005634	GO:0009409	GO:0009639	GO:0009651	GO:0009723	GO:0009733	GO:0009737	GO:0009739	GO:0009751	GO:0009753	GO:0010243	GO:0010264	GO:0019904	GO:0042754	GO:0043496	GO:0043565	GO:0045892	GO:0045893	GO:0046686	GO:0048574
gi_351612894_gb_JP467195.1	GO:0004091	GO:0004104	GO:0004560	GO:0005576	GO:0006629	GO:0009505	GO:0009506	GO:0016298	GO:0019863	GO:0043231	GO:0044238	GO:0044249	GO:0044444	GO:0071554
gi_351612901_gb_JP467202.1	GO:0005525	GO:0005794	GO:0007264	GO:0009827	GO:0015031	GO:0016020	GO:0016192	GO:0016787	GO:0019900	GO:0045177	GO:0070382	GO:0080092	GO:0090404
gi_351613034_gb_JP467335.1	GO:0006351	GO:0016787	GO:0019054	GO:0019219	GO:0042802	GO:0044464	GO:2000112
gi_351613155_gb_JP467456.1	GO:0000226	GO:0000394	GO:0003924	GO:0004767	GO:0005525	GO:0005576	GO:0005730	GO:0005737	GO:0005819	GO:0005886	GO:0007015	GO:0007264	GO:0009086	GO:0009524	GO:0009531	GO:0009664	GO:0009734	GO:0009788	GO:0009825	GO:0009832	GO:0009860	GO:0010119	GO:0010413	GO:0010817	GO:0017157	GO:0019901	GO:0019903	GO:0030427	GO:0030833	GO:0030834	GO:0032794	GO:0043481	GO:0045177	GO:0045492	GO:0048767	GO:0051650
gi_351613177_gb_JP467478.1	GO:0002679	GO:0004601	GO:0005576	GO:0005634	GO:0005783	GO:0006612	GO:0006826	GO:0006979	GO:0009269	GO:0009409	GO:0009505	GO:0009506	GO:0009664	GO:0009809	GO:0009863	GO:0010054	GO:0010106	GO:0010167	GO:0010200	GO:0010359	GO:0010363	GO:0015706	GO:0016020	GO:0016023	GO:0016132	GO:0016757	GO:0020037	GO:0042538	GO:0043069	GO:0046872	GO:0048046	GO:0048527	GO:0048767	GO:0050832	GO:0055114	GO:0071456
gi_351613346_gb_JP467647.1	GO:0002376	GO:0004601	GO:0005515	GO:0005634	GO:0006826	GO:0006979	GO:0009269	GO:0009409	GO:0009505	GO:0009506	GO:0009664	GO:0009808	GO:0010033	GO:0010106	GO:0010167	GO:0010359	GO:0010413	GO:0015706	GO:0016020	GO:0016132	GO:0020037	GO:0042538	GO:0043067	GO:0044444	GO:0045492	GO:0045730	GO:0046872	GO:0048046	GO:0048527	GO:0048589	GO:0048765	GO:0050832	GO:0055114
gi_351613432_gb_JP467733.1	GO:0005794	GO:0009505	GO:0009506	GO:0016043	GO:0016049	GO:0046658	GO:0048364	GO:0065008	GO:0071704
gi_351613442_gb_JP467743.1	GO:0005829	GO:0005886	GO:0009269	GO:0009409	GO:0009611	GO:0009644	GO:0009737	GO:0009793	GO:0010286	GO:0048046	GO:0050832
gi_351613513_gb_JP467814.1	GO:0001411	GO:0005515	GO:0005618	GO:0006952	GO:0009056	GO:0016020	GO:0016787	GO:0022603	GO:0022607	GO:0030036	GO:0031225	GO:0032506	GO:0032535	GO:0033043	GO:0040007	GO:0043170	GO:0043231	GO:0043234	GO:0044444	GO:0051716
gi_351613568_gb_JP467869.1	GO:0000226	GO:0000724	GO:0000902	GO:0000911	GO:0005618	GO:0005768	GO:0005783	GO:0005802	GO:0005886	GO:0006096	GO:0006816	GO:0006833	GO:0007030	GO:0009409	GO:0009414	GO:0009536	GO:0009664	GO:0009750	GO:0009832	GO:0009833	GO:0009834	GO:0009846	GO:0009863	GO:0009867	GO:0009873	GO:0009965	GO:0010116	GO:0010413	GO:0010583	GO:0016760	GO:0030173	GO:0030244	GO:0042127	GO:0042538	GO:0042742	GO:0045492	GO:0046686	GO:0048193	GO:0048767	GO:0050832	GO:0051753	GO:0052386
gi_351613643_gb_JP467944.1	GO:0005739	GO:0005782	GO:0006457	GO:0009408	GO:0009644	GO:0009651	GO:0010286	GO:0034976	GO:0042542	GO:0045471	GO:0046685	GO:0046686	GO:0046688	GO:0051259
gi_351613675_gb_JP467976.1	GO:0003333	GO:0005744	GO:0006950	GO:0010033	GO:0015031	GO:0015171	GO:0015450	GO:0031359
gi_351613743_gb_JP468044.1	GO:0005515	GO:0005794	GO:0005886	GO:0009505	GO:0009506	GO:0009834	GO:0016049	GO:0016604	GO:0031225	GO:0044238	GO:0046658	GO:0048513	GO:0065007	GO:0071840
gi_351613839_gb_JP468140.1	GO:0000139	GO:0004439	GO:0005515	GO:0005634	GO:0005739	GO:0005794	GO:0006487	GO:0007033	GO:0007155	GO:0007626	GO:0009506	GO:0009826	GO:0009832	GO:0010090	GO:0010413	GO:0031642	GO:0031901	GO:0031902	GO:0032288	GO:0032957	GO:0036092	GO:0043473	GO:0043813	GO:0045010	GO:0045492	GO:0046855	GO:0048666	GO:0048765	GO:0071555
gi_351613888_gb_JP468189.1	GO:0004553	GO:0005576	GO:0005618	GO:0005794	GO:0006073	GO:0009408	GO:0009409	GO:0009505	GO:0009507	GO:0009611	GO:0009612	GO:0009664	GO:0009733	GO:0009741	GO:0010089	GO:0010200	GO:0010411	GO:0016023	GO:0016762	GO:0033946	GO:0042545	GO:0048046	GO:0048765	GO:0080022	GO:0080039
gi_351613906_gb_JP468207.1	GO:0000786	GO:0003677	GO:0005730	GO:0005739	GO:0005774	GO:0005794	GO:0005829	GO:0005886	GO:0006334	GO:0009414	GO:0009506	GO:0009507	GO:0009579	GO:0015629	GO:0045653	GO:0046982
gi_351613908_gb_JP468209.1	GO:0000165	GO:0000210	GO:0002679	GO:0005515	GO:0005634	GO:0005829	GO:0005886	GO:0006612	GO:0006944	GO:0009409	GO:0009595	GO:0009611	GO:0009651	GO:0009697	GO:0009738	GO:0009862	GO:0009867	GO:0009870	GO:0010193	GO:0010200	GO:0010310	GO:0010363	GO:0010581	GO:0017110	GO:0019684	GO:0030968	GO:0031348	GO:0035529	GO:0042742	GO:0043069	GO:0043900	GO:0047631	GO:0050832	GO:0051287	GO:0070212	GO:0080041	GO:0080042	GO:0080151
gi_351613982_gb_JP468283.1	GO:0005515	GO:0005634	GO:0005737	GO:0005886	GO:0006869	GO:0008289	GO:0009506	GO:0009535	GO:0009653	GO:0030041	GO:0032535	GO:0033036	GO:0042995	GO:0043232	GO:0044425	GO:0044446	GO:0048046	GO:0048731	GO:0048869	GO:0050794	GO:0051128
gi_351614003_gb_JP468304.1	GO:0000271	GO:0005576	GO:0005886	GO:0006508	GO:0006952	GO:0007389	GO:0008233	GO:0008361	GO:0009505	GO:0009506	GO:0009825	GO:0009926	GO:0009932	GO:0010075	GO:0019344	GO:0030414	GO:0031640	GO:0043481	GO:0048767	GO:0050829	GO:0050832	GO:0071555
gi_351614034_gb_JP468335.1	GO:0005794	GO:0009505	GO:0009506	GO:0040007	GO:0046658
gi_351614127_gb_JP468428.1	GO:0005576	GO:0005618	GO:0005737	GO:0006857	GO:0009651	GO:0016023	GO:0030145	GO:0031012	GO:0042350	GO:0045735	GO:0046872	GO:0050162	GO:0055114
gi_351614132_gb_JP468433.1	GO:0005794	GO:0009505	GO:0009506	GO:0046658
gi_351614136_gb_JP468437.1	GO:0005507	GO:0005829	GO:0005886	GO:0006561	GO:0006631	GO:0008202	GO:0009408	GO:0009414	GO:0009536	GO:0009750	GO:0010115	GO:0010182	GO:0010301	GO:0042742	GO:0047044	GO:0051504	GO:0055114
gi_351614184_gb_JP468485.1	GO:0005794	GO:0005886	GO:0007275	GO:0009505	GO:0009506	GO:0009651	GO:0009825	GO:0009834	GO:0009897	GO:0016043	GO:0031225	GO:0046658	GO:0065008
gi_351614273_gb_JP468574.1	GO:0005694	GO:0005730	GO:0005739	GO:0043229
gi_351614347_gb_JP468648.1	GO:0003700	GO:0005634	GO:0006281	GO:0006351	GO:0007623	GO:0008270	GO:0009637	GO:0009644	GO:0009658	GO:0009744	GO:0009909	GO:0010100	GO:0010155	GO:0010161	GO:0010218	GO:0032880	GO:0042802
gi_351614393_gb_JP468694.1	GO:0005509	GO:0005634	GO:0005739	GO:0005886	GO:0009409	GO:0009567	GO:0009611	GO:0009620	GO:0009693	GO:0009695	GO:0009738	GO:0009753	GO:0009863	GO:0009873	GO:0009909	GO:0010193	GO:0010200	GO:0010286	GO:0016043	GO:0030968	GO:0035556	GO:0045088	GO:0048610	GO:0048767	GO:0048868	GO:0052542	GO:0080164
gi_351614440_gb_JP468741.1	GO:0003700	GO:0005622	GO:0005730	GO:0006096	GO:0006281	GO:0006833	GO:0006972	GO:0007030	GO:0007623	GO:0008270	GO:0009266	GO:0009611	GO:0009637	GO:0009641	GO:0009644	GO:0009651	GO:0009658	GO:0009737	GO:0009741	GO:0009744	GO:0009805	GO:0009909	GO:0009963	GO:0010018	GO:0010100	GO:0010155	GO:0010161	GO:0010200	GO:0010223	GO:0010229	GO:0032880	GO:0042802	GO:0045892	GO:0045893	GO:0046686	GO:0048576	GO:0048579	GO:0080167
gi_351614484_gb_JP468785.1	GO:0009536
gi_351614506_gb_JP468807.1	GO:0003713	GO:0005515	GO:0005634	GO:0005694	GO:0006355	GO:0006396	GO:0008283	GO:0009955	GO:0009965	GO:0016043	GO:0044446	GO:0048366	GO:0048481	GO:0048513	GO:0048522	GO:0050896
gi_351614580_gb_JP468881.1	GO:0030001	GO:0046872
gi_351614719_gb_JP469020.1	GO:0000165	GO:0005576	GO:0005618	GO:0006612	GO:0009414	GO:0009595	GO:0009697	GO:0009862	GO:0009867	GO:0010200	GO:0010266	GO:0010310	GO:0010363	GO:0031348	GO:0034976	GO:0042742	GO:0043900	GO:0050832
gi_351614726_gb_JP469027.1	GO:0005739	GO:0006626	GO:0006631	GO:0009055	GO:0009407	GO:0010583	GO:0015035	GO:0045454
gi_351614811_gb_JP469112.1	GO:0001510	GO:0003735	GO:0005618	GO:0005730	GO:0005774	GO:0005794	GO:0005886	GO:0006412	GO:0009506	GO:0022625	GO:0042254
gi_351614825_gb_JP469126.1	GO:0003676	GO:0005730	GO:0006355	GO:0008152	GO:0030447	GO:0031981	GO:0032040	GO:0032991	GO:0042254	GO:0043232
gi_351614921_gb_JP469222.1	GO:0005515	GO:0005634	GO:0009615	GO:0010585	GO:0016021	GO:0016023	GO:0019048	GO:0080143
gi_351614998_gb_JP469299.1	GO:0000325	GO:0005524	GO:0005730	GO:0005774	GO:0005794	GO:0005887	GO:0006200	GO:0006690	GO:0006767	GO:0006855	GO:0006979	GO:0008559	GO:0009407	GO:0009408	GO:0009506	GO:0015432	GO:0015446	GO:0015700	GO:0015722	GO:0015732	GO:0016021	GO:0016323	GO:0016324	GO:0019904	GO:0030644	GO:0031427	GO:0032355	GO:0032440	GO:0032496	GO:0033559	GO:0042626	GO:0046685	GO:0055085	GO:0055114	GO:0070327	GO:0071992
gi_351615003_gb_JP469304.1	GO:0000976	GO:0003700	GO:0005634	GO:0006351	GO:0009269	GO:0009409	GO:0009615	GO:0009630	GO:0009637	GO:0009651	GO:0009788	GO:0009965	GO:0010167	GO:0010228	GO:0015706	GO:0015996	GO:0042744	GO:0042803	GO:0043565	GO:0045893
gi_351615029_gb_JP469330.1	GO:0002679	GO:0004674	GO:0005524	GO:0005634	GO:0005886	GO:0006468	GO:0006612	GO:0006944	GO:0006979	GO:0009506	GO:0009507	GO:0009611	GO:0009863	GO:0009875	GO:0010200	GO:0010363	GO:0019199	GO:0030246	GO:0031625	GO:0043069	GO:0046777	GO:0048544	GO:0050832
gi_351615102_gb_JP469403.1	GO:0000041	GO:0002679	GO:0004674	GO:0005524	GO:0005886	GO:0006096	GO:0006468	GO:0006833	GO:0006972	GO:0007030	GO:0007267	GO:0009266	GO:0009506	GO:0009507	GO:0009616	GO:0009651	GO:0009664	GO:0009793	GO:0009960	GO:0010167	GO:0010193	GO:0010200	GO:0010267	GO:0010413	GO:0010483	GO:0015706	GO:0015824	GO:0030048	GO:0030244	GO:0035196	GO:0043680	GO:0045492	GO:0046686	GO:0046777	GO:0048193	GO:0048767	GO:0050832	GO:0051510
gi_351615107_gb_JP469408.1	GO:0005507	GO:0006007	GO:0006970	GO:0046686
gi_351615132_gb_JP469433.1	GO:0004565	GO:0005774	GO:0005829	GO:0005975	GO:0006084	GO:0006598	GO:0009505	GO:0009506	GO:0009536	GO:0009664	GO:0009698	GO:0009832	GO:0010075	GO:0016023	GO:0016126	GO:0016132	GO:0030246	GO:0032880	GO:0042398	GO:0042744	GO:0043169	GO:0048046	GO:0048767	GO:0080167
gi_351615177_gb_JP469478.1	GO:0000302	GO:0000785	GO:0005634	GO:0005739	GO:0005886	GO:0006259	GO:0006355	GO:0006827	GO:0006878	GO:0007568	GO:0009651	GO:0009698	GO:0009909	GO:0010093	GO:0010314	GO:0016458	GO:0018024	GO:0040029	GO:0044212	GO:0044434	GO:0046686	GO:0048046	GO:0051568
gi_351615231_gb_JP469532.1	GO:0097159
gi_351615241_gb_JP469542.1	GO:0003723	GO:0003964	GO:0005739	GO:0006278
gi_351615270_gb_JP469571.1	GO:0009535
gi_351615273_gb_JP469574.1	GO:0000041	GO:0005634	GO:0005770	GO:0005774	GO:0005794	GO:0006812	GO:0008324	GO:0009718	GO:0009744	GO:0010042	GO:0010224	GO:0010264	GO:0010486	GO:0015562	GO:0016021	GO:0030026	GO:0046688	GO:0055085	GO:0070838	GO:0072509
gi_351615280_gb_JP469581.1	GO:0003677	GO:0006098	GO:0006364	GO:0009508	GO:0009737	GO:0009773	GO:0009941	GO:0010027	GO:0010207	GO:0030093	GO:0035304
gi_351615325_gb_JP469626.1	GO:0006950
gi_351615351_gb_JP469652.1	GO:0005515	GO:0006364	GO:0006417	GO:0006655	GO:0007186	GO:0009523	GO:0009528	GO:0009535	GO:0009570	GO:0009707	GO:0009773	GO:0009902	GO:0010027	GO:0010182	GO:0010207	GO:0010319	GO:0016021	GO:0019288	GO:0035304	GO:0042742	GO:0042793	GO:0045037	GO:0045038	GO:0045893
gi_351615442_gb_JP469743.1	GO:0005576	GO:0005618	GO:0005773	GO:0007165	GO:0009615	GO:0009627	GO:0010033	GO:0010224	GO:0016023	GO:0016043	GO:0019438	GO:0031323	GO:0031347	GO:0031540	GO:0044260	GO:0046686	GO:0048046	GO:0051707	GO:0060255
gi_351615452_gb_JP469753.1	GO:0000023	GO:0004364	GO:0005634	GO:0005774	GO:0005794	GO:0005829	GO:0005886	GO:0006094	GO:0006096	GO:0006569	GO:0006635	GO:0006749	GO:0006979	GO:0009407	GO:0009409	GO:0009506	GO:0009570	GO:0009635	GO:0009651	GO:0009684	GO:0009694	GO:0009734	GO:0009751	GO:0009753	GO:0010583	GO:0015824	GO:0016036	GO:0016740	GO:0019252	GO:0019375	GO:0019899	GO:0042631	GO:0043085	GO:0043161	GO:0043295	GO:0046686	GO:0048046	GO:0051788	GO:0080129	GO:0080167	GO:2000030
gi_351615523_gb_JP469824.1	GO:0003677	GO:0003700	GO:0005634	GO:0006355	GO:0009888	GO:0048364	GO:0071554
gi_351615614_gb_JP469915.1	GO:0002168	GO:0005515	GO:0005741	GO:0005743	GO:0005789	GO:0005811	GO:0006569	GO:0006767	GO:0008047	GO:0009055	GO:0009684	GO:0009703	GO:0016021	GO:0016126	GO:0016491	GO:0019745	GO:0019761	GO:0019899	GO:0020037	GO:0022900	GO:0035206	GO:0042742	GO:0043085	GO:0043447	GO:0045610	GO:0046872	GO:0051726
gi_351615669_gb_JP469970.1	GO:0003006	GO:0003677	GO:0006355	GO:0006979	GO:0007165	GO:0009408	GO:0009611	GO:0009631	GO:0009643	GO:0009725	GO:0010200	GO:0010224	GO:0042538	GO:0044238	GO:0044260	GO:0045926	GO:0048731	GO:0071310
gi_351615691_gb_JP469992.1	GO:0005622	GO:0006626
gi_351615730_gb_JP470031.1	GO:0004089	GO:0005515	GO:0005829	GO:0008152	GO:0008270	GO:0009409	GO:0009535	GO:0009570	GO:0009817	GO:0009941	GO:0010037	GO:0010119	GO:0010319	GO:0015976	GO:0042742	GO:0048046	GO:0071470
gi_351615743_gb_JP470044.1	GO:0003677	GO:0006098	GO:0006364	GO:0009508	GO:0009535	GO:0009737	GO:0009773	GO:0009941	GO:0010027	GO:0010207	GO:0010287	GO:0030093	GO:0035304
gi_351615767_gb_JP470068.1	GO:0003677	GO:0003682	GO:0003700	GO:0005488	GO:0005634	GO:0009414	GO:0009611	GO:0009625	GO:0009651	GO:0009682	GO:0009733	GO:0009737	GO:0009739	GO:0009744	GO:0009751	GO:0009753	GO:0009800	GO:0009813	GO:0009873	GO:0010090	GO:0010224	GO:0010438	GO:0010439	GO:0045892	GO:0045893	GO:0046686	GO:0048354	GO:0050832	GO:0071702	GO:0071705	GO:2000762
gi_351615836_gb_JP470137.1	GO:0000023	GO:0008937	GO:0009570	GO:0009941	GO:0019252	GO:0030385	GO:0043085	GO:0046872	GO:0051539	GO:0055114
gi_351615908_gb_JP470209.1	GO:0000023	GO:0004364	GO:0004601	GO:0005634	GO:0005737	GO:0005774	GO:0005794	GO:0005829	GO:0005886	GO:0006094	GO:0006096	GO:0006569	GO:0006635	GO:0006979	GO:0009407	GO:0009570	GO:0009651	GO:0009684	GO:0009734	GO:0010583	GO:0015824	GO:0016036	GO:0019252	GO:0019375	GO:0019899	GO:0042631	GO:0043085	GO:0043161	GO:0043295	GO:0046686	GO:0048046	GO:0051788	GO:0080129	GO:2000030
gi_351616005_gb_JP470306.1	GO:0005576
gi_351616097_gb_JP470398.1	GO:0000038	GO:0005576	GO:0006869	GO:0008289	GO:0009535	GO:0016020	GO:0042335
gi_351616156_gb_JP470457.1	GO:0000166	GO:0003723	GO:0005515	GO:0005634	GO:0006355	GO:0006952	GO:0006970	GO:0009269	GO:0009409	GO:0009414	GO:0009723	GO:0009725	GO:0009737	GO:0009751	GO:0009791	GO:0010154	GO:0016020	GO:0019752	GO:0042430	GO:0043566	GO:0044272	GO:0044444	GO:0046394	GO:0046914	GO:0065007	GO:0071840	GO:0071944
gi_351616159_gb_JP470460.1	GO:0006098	GO:0009570	GO:0009941	GO:0010027	GO:0010103	GO:0016117	GO:0016787	GO:0019252	GO:0019684	GO:0044237	GO:0050308
gi_351616179_gb_JP470480.1	GO:0000023	GO:0000024	GO:0000186	GO:0000271	GO:0004674	GO:0004709	GO:0004713	GO:0004871	GO:0005524	GO:0005634	GO:0005829	GO:0005886	GO:0005983	GO:0006355	GO:0007020	GO:0007169	GO:0008361	GO:0009409	GO:0009414	GO:0009570	GO:0009617	GO:0009664	GO:0009740	GO:0009825	GO:0009832	GO:0009855	GO:0009926	GO:0009932	GO:0009934	GO:0010014	GO:0010030	GO:0010067	GO:0010075	GO:0010080	GO:0010089	GO:0010102	GO:0010162	GO:0010223	GO:0010480	GO:0010817	GO:0016021	GO:0016161	GO:0019252	GO:0022402	GO:0032440	GO:0033612	GO:0043481	GO:0043621	GO:0045490
gi_351616200_gb_JP470501.1	GO:0004497	GO:0005515	GO:0009507	GO:0009573	GO:0009579	GO:0009637	GO:0009853	GO:0009941	GO:0010114	GO:0010218	GO:0016020	GO:0016984	GO:0019253	GO:0048046	GO:0055114
gi_351616205_gb_JP470506.1	GO:0000164	GO:0005634	GO:0006897	GO:0006952	GO:0016020	GO:0016567	GO:0016874	GO:0019903	GO:0046579	GO:0051704
gi_351616231_gb_JP470532.1	GO:0000902	GO:0005509	GO:0005544	GO:0005773	GO:0005794	GO:0005886	GO:0006623	GO:0006944	GO:0008060	GO:0009555	GO:0016021	GO:0016049	GO:0016197	GO:0048193
gi_351616244_gb_JP470545.1	GO:0000302	GO:0000785	GO:0005515	GO:0005634	GO:0005737	GO:0005739	GO:0005886	GO:0006259	GO:0006355	GO:0006827	GO:0006878	GO:0007568	GO:0009506	GO:0009651	GO:0009698	GO:0009909	GO:0010093	GO:0010286	GO:0010314	GO:0016458	GO:0018024	GO:0030001	GO:0040029	GO:0044212	GO:0044434	GO:0046686	GO:0046872	GO:0048046	GO:0051568
gi_351616251_gb_JP470552.1	GO:0005515	GO:0006098	GO:0006124	GO:0009055	GO:0009416	GO:0009570	GO:0009637	GO:0009644	GO:0009688	GO:0009744	GO:0009767	GO:0009773	GO:0010114	GO:0010155	GO:0010207	GO:0010218	GO:0042742	GO:0046872	GO:0051537	GO:0080167
gi_351616270_gb_JP470571.1	GO:0005488	GO:0006952	GO:0044464
gi_351616280_gb_JP470581.1	GO:0003824	GO:0005488
gi_351616357_gb_JP470658.1	GO:0005737	GO:0006457	GO:0009408	GO:0009644	GO:0009651	GO:0010286	GO:0042542	GO:0045471	GO:0046685	GO:0046686	GO:0046688	GO:0051260
gi_351616368_gb_JP470669.1	GO:0005488	GO:0009987	GO:0016020	GO:0044464	GO:0045087
gi_351616376_gb_JP470677.1	GO:0005739	GO:0005886	GO:0009535	GO:0010155	GO:0010258	GO:0010598	GO:0016655	GO:0019684	GO:0046777	GO:0055114
gi_351616450_gb_JP470751.1	GO:0000166	GO:0000398	GO:0001837	GO:0001947	GO:0003228	GO:0003700	GO:0003723	GO:0003730	GO:0005515	GO:0005730	GO:0005829	GO:0006397	GO:0006977	GO:0006978	GO:0008285	GO:0010830	GO:0043484	GO:0043565	GO:0045893	GO:0048609	GO:0070935
gi_351616472_gb_JP470773.1	GO:0004497	GO:0005506	GO:0005739	GO:0005783	GO:0005794	GO:0005886	GO:0009055	GO:0016491	GO:0016705	GO:0020037	GO:0044425	GO:0046872	GO:0055114
gi_351616482_gb_JP470783.1	GO:0005618	GO:0005886	GO:0009411	GO:0009888	GO:0016049	GO:0043231	GO:0045010	GO:0048513	GO:0048869	GO:0051015	GO:0051016	GO:0060560
gi_351616488_gb_JP470789.1	GO:0004607	GO:0004620	GO:0005576	GO:0005739	GO:0005829	GO:0006629	GO:0006944	GO:0009395	GO:0048193
gi_351616572_gb_JP470873.1	GO:0046658
gi_351616614_gb_JP470915.1	GO:0005615	GO:0006629	GO:0006952	GO:0009627	GO:0009725	GO:0009751	GO:0009817	GO:0009866	GO:0009871	GO:0016298	GO:0016788	GO:0043231	GO:0044444	GO:0051707
gi_351616616_gb_JP470917.1	GO:0003985	GO:0005829	GO:0007275	GO:0008610	GO:0009698	GO:0009718	GO:0016043	GO:0016410	GO:0044249	GO:0047634	GO:0048856	GO:0050736
gi_351616650_gb_JP470951.1	GO:0005515
gi_351616700_gb_JP471001.1	GO:0005774	GO:0005886	GO:0006612	GO:0009269	GO:0009409	GO:0009535	GO:0009570	GO:0009611	GO:0009620	GO:0009651	GO:0009695	GO:0009723	GO:0009738	GO:0009753	GO:0009863	GO:0009941	GO:0010319	GO:0010363	GO:0035556	GO:0043069	GO:0046423	GO:0050832	GO:0052542
gi_351616728_gb_JP471029.1	GO:0000325	GO:0005515	GO:0005524	GO:0005634	GO:0005774	GO:0005794	GO:0006200	GO:0006766	GO:0009506	GO:0009627	GO:0009697	GO:0010290	GO:0015431	GO:0015893	GO:0015908	GO:0016021	GO:0031088	GO:0032440	GO:0042626	GO:0044238	GO:0044459	GO:0046483	GO:0048046	GO:0048545	GO:0055085	GO:0055114	GO:0065008	GO:0072337
gi_351616755_gb_JP471056.1	GO:0005515	GO:0005737	GO:0043229	GO:0050794
gi_351616807_gb_JP471108.1	GO:0003824	GO:0006139	GO:0006281	GO:0016798	GO:0044281
gi_351616841_gb_JP471142.1	GO:0005634	GO:0005739	GO:0005829	GO:0009536	GO:0009691	GO:0010076	GO:0010077	GO:0010083	GO:0016799	GO:0016829	GO:0042803	GO:0048832
gi_351616865_gb_JP471166.1	GO:0000166	GO:0004672	GO:0006464	GO:0006796	GO:0007165	GO:0016043	GO:0016301	GO:0016310	GO:0031347	GO:0033554	GO:0045087	GO:0051707	GO:0071310
gi_351616895_gb_JP471196.1	GO:0005634	GO:0005874	GO:0005886	GO:0006302	GO:0006312	GO:0006346	GO:0007010	GO:0007062	GO:0007129	GO:0007131	GO:0008017	GO:0009560	GO:0009832	GO:0010005	GO:0010051	GO:0010075	GO:0010413	GO:0016572	GO:0031048	GO:0042138	GO:0045010	GO:0045132	GO:0045492	GO:0051225	GO:0051567
gi_351616960_gb_JP471261.1	GO:0000710	GO:0000795	GO:0000911	GO:0001541	GO:0003684	GO:0005524	GO:0006200	GO:0006302	GO:0006312	GO:0007062	GO:0007067	GO:0007131	GO:0007283	GO:0007292	GO:0008094	GO:0009506	GO:0010332	GO:0010564	GO:0030983	GO:0032204	GO:0032300	GO:0032504	GO:0042138	GO:0043247	GO:0045143	GO:0051026
gi_351617035_gb_JP471336.1	GO:0004190	GO:0005515	GO:0005768	GO:0005774	GO:0005794	GO:0005886	GO:0006508	GO:0010008	GO:0016021	GO:0016023	GO:0030176	GO:0033619
gi_351617093_gb_JP471394.1	GO:0005488	GO:0005515	GO:0005634	GO:0009409	GO:0009651	GO:0009723	GO:0009733	GO:0009737	GO:0009739	GO:0009751	GO:0009753	GO:0010243	GO:0042754	GO:0043496	GO:0043565	GO:0045892	GO:0045893	GO:0046686	GO:0048574
gi_351617115_gb_JP471416.1	GO:0001578	GO:0007163	GO:0009825	GO:0010015	GO:0010031	GO:0010091	GO:0055028
gi_351617143_gb_JP471444.1	GO:0005737	GO:0008374	GO:0009653	GO:0016043	GO:0016410	GO:0044238	GO:0044249	GO:0047672	GO:0048731	GO:0050896	GO:0051179
gi_351617165_gb_JP471466.1	GO:0003824	GO:0005488
gi_351617174_gb_JP471475.1	GO:0000023	GO:0004364	GO:0004462	GO:0005634	GO:0005774	GO:0005794	GO:0005829	GO:0005886	GO:0006094	GO:0006096	GO:0006569	GO:0006635	GO:0006749	GO:0006979	GO:0009407	GO:0009409	GO:0009570	GO:0009635	GO:0009651	GO:0009684	GO:0009734	GO:0009751	GO:0010583	GO:0015824	GO:0016036	GO:0019252	GO:0019375	GO:0019899	GO:0042631	GO:0043085	GO:0043161	GO:0043295	GO:0046686	GO:0048046	GO:0051788	GO:0080129	GO:0080167	GO:2000030
gi_351617184_gb_JP471485.1	GO:0000904	GO:0003824	GO:0005515	GO:0007165	GO:0009505	GO:0009506	GO:0009725	GO:0009826	GO:0009886	GO:0010016	GO:0010054	GO:0016020	GO:0043231	GO:0044237	GO:0044238	GO:0044444	GO:0048229	GO:0048443	GO:0048507	GO:0071555	GO:0071669	GO:2000026
gi_351617194_gb_JP471495.1	GO:0005488	GO:0044464
gi_351617226_gb_JP471527.1	GO:0005739	GO:0006672	GO:0016021	GO:0016811
gi_351617299_gb_JP471600.1	GO:0005524	GO:0005634	GO:0005730	GO:0005829	GO:0005886	GO:0006397	GO:0006468	GO:0008353	GO:0008380	GO:0009616	GO:0009957	GO:0010050	GO:0010228	GO:0010267	GO:0016607	GO:0019908	GO:0030097	GO:0030332	GO:0035196	GO:0043405	GO:0046777	GO:0048366	GO:0070816
gi_351617342_gb_JP471643.1	GO:0004091
gi_351617368_gb_JP471669.1	GO:0004842	GO:0005515	GO:0005634	GO:0008270	GO:0009651	GO:0009687	GO:0009739	GO:0009789	GO:0010200	GO:0016567	GO:0031224	GO:0044444	GO:0047484
gi_351617382_gb_JP471683.1	GO:0005515	GO:0009987	GO:0044464	GO:0045087
gi_351617435_gb_JP471736.1	GO:0005488	GO:0007389	GO:0048441	GO:0048444	GO:0051239
gi_351617462_gb_JP471763.1	GO:0005507	GO:0005576	GO:0005829	GO:0005886	GO:0006561	GO:0008202	GO:0009408	GO:0009414	GO:0009536	GO:0009750	GO:0010115	GO:0010182	GO:0010301	GO:0016491	GO:0042742	GO:0047044	GO:0051504	GO:0055114
gi_351617468_gb_JP471769.1	GO:0006833	GO:0009409	GO:0009416	GO:0009507	GO:0009535	GO:0009570	GO:0009651	GO:0009744	GO:0009750	GO:0009941	GO:0010319	GO:0019684	GO:0030003	GO:0042742	GO:0070838
gi_351617498_gb_JP471799.1	GO:0005576	GO:0009506	GO:0009740	GO:0009744	GO:0009749	GO:0009750	GO:0009751	GO:0010162	GO:0010286	GO:0019344	GO:0044237	GO:0045454	GO:0071944	GO:0080167	GO:0097305
gi_351617508_gb_JP471809.1	GO:0005886
gi_351617530_gb_JP471831.1	GO:0005634	GO:0005789	GO:0006629	GO:0006636	GO:0009266	GO:0009941	GO:0016021	GO:0016717	GO:0016720	GO:0045485	GO:0055114
gi_351617558_gb_JP471859.1	GO:0003006	GO:0003824	GO:0005488	GO:0008152	GO:0009791	GO:0010033	GO:0048731	GO:0050794	GO:0071944
gi_351617604_gb_JP471905.1	GO:0000278	GO:0000724	GO:0000790	GO:0000795	GO:0005634	GO:0005712	GO:0006200	GO:0006260	GO:0006261	GO:0006275	GO:0006298	GO:0006302	GO:0006306	GO:0006310	GO:0006312	GO:0007059	GO:0007062	GO:0007127	GO:0007129	GO:0007131	GO:0009555	GO:0009560	GO:0009737	GO:0009793	GO:0009845	GO:0010162	GO:0010468	GO:0010564	GO:0016444	GO:0016568	GO:0016887	GO:0030674	GO:0030983	GO:0031047	GO:0032389	GO:0032390	GO:0042138	GO:0045132	GO:0048229	GO:0048366	GO:0048609	GO:0048825	GO:0051276	GO:0051726	GO:0097159
gi_351617608_gb_JP471909.1	GO:0005576	GO:0007275	GO:0044424	GO:0048856
gi_351617657_gb_JP471958.1	GO:0005576	GO:0005739	GO:0005794	GO:0005829	GO:0005886	GO:0005975	GO:0008810	GO:0009505	GO:0009506	GO:0009507	GO:0009624	GO:0009664	GO:0009855	GO:0009944	GO:0010014	GO:0010051	GO:0010089	GO:0010093	GO:0016023	GO:0030245	GO:0042547	GO:0044036	GO:0048440
gi_351617668_gb_JP471969.1	GO:0005215	GO:0005634	GO:0005794	GO:0006810	GO:0031348	GO:0042546	GO:0043231	GO:0044444
gi_351617677_gb_JP471978.1	GO:0003006	GO:0004091	GO:0005829	GO:0006952	GO:0009653	GO:0009791	GO:0010476	GO:0014070	GO:0016043	GO:0044238	GO:0048468	GO:0048513	GO:0048583	GO:0051704	GO:0052689	GO:0071554
gi_351617683_gb_JP471984.1	GO:0005634	GO:0006612	GO:0006950	GO:0007165	GO:0008270	GO:0009407	GO:0009414	GO:0009611	GO:0009723	GO:0009725	GO:0009733	GO:0009738	GO:0009863	GO:0009867	GO:0010200	GO:0010286	GO:0010363	GO:0010583	GO:0042538	GO:0043231	GO:0046872
gi_351617685_gb_JP471986.1	GO:0004842	GO:0005515	GO:0005634	GO:0005774	GO:0008270	GO:0009651	GO:0009789	GO:0010200	GO:0016567	GO:0047484	GO:0048765	GO:0050832
gi_351617774_gb_JP472075.1	GO:0005515	GO:0006357	GO:0006635	GO:0009755	GO:0009952	GO:0010089	GO:0022037	GO:0030901	GO:0042472	GO:0044036	GO:0048852
gi_351617805_gb_JP472106.1	GO:0005199	GO:0005576	GO:0005829	GO:0006949	GO:0009505	GO:0009506	GO:0009507	GO:0009664	GO:0009739	GO:0009826	GO:0009828	GO:0009831	GO:0010114	GO:0010119	GO:0016020	GO:0016023	GO:0046685
gi_351617815_gb_JP472116.1	GO:0009507	GO:0031072	GO:0044237	GO:0051082
gi_351617853_gb_JP472154.1	GO:0004089	GO:0005829	GO:0005886	GO:0008270	GO:0009440	GO:0009570	GO:0009941	GO:0010037	GO:0010119	GO:0015976	GO:0042802	GO:0071470
gi_351617869_gb_JP472170.1	GO:0000184	GO:0004386	GO:0005737	GO:0006281	GO:0006351	GO:0009553	GO:0009875	GO:0010183	GO:0010468	GO:0030529	GO:0031981	GO:0043232	GO:0044267	GO:0048451	GO:0048453	GO:0080090	GO:0097159	GO:2000112
gi_351617870_gb_JP472171.1	GO:0005634	GO:0009553	GO:0009875	GO:0010183
gi_351617892_gb_JP472193.1	GO:0004575	GO:0004725	GO:0005515	GO:0005576	GO:0005634	GO:0005739	GO:0005829	GO:0005886	GO:0005982	GO:0005987	GO:0006470	GO:0006520	GO:0006970	GO:0009507	GO:0009611	GO:0009805	GO:0010075	GO:0033926	GO:0042542	GO:0044003	GO:0046686	GO:0048364	GO:0048825
gi_351617896_gb_JP472197.1	GO:0002679	GO:0004601	GO:0005634	GO:0005783	GO:0005794	GO:0005886	GO:0006612	GO:0006826	GO:0006979	GO:0009269	GO:0009409	GO:0009505	GO:0009506	GO:0009664	GO:0009808	GO:0009863	GO:0010106	GO:0010167	GO:0010200	GO:0010359	GO:0010363	GO:0010413	GO:0015706	GO:0016023	GO:0016132	GO:0020037	GO:0042538	GO:0043069	GO:0045492	GO:0046872	GO:0048046	GO:0048527	GO:0048589	GO:0048765	GO:0050832	GO:0055114
gi_351617900_gb_JP472201.1	GO:0003677	GO:0003700	GO:0005515	GO:0005634	GO:0006355	GO:0009725	GO:0009734	GO:0009908	GO:0010050	GO:0010158	GO:0046983	GO:0048513
gi_351617925_gb_JP472226.1	GO:0005515	GO:0005524	GO:0005634	GO:0005773	GO:0005886	GO:0006200	GO:0006754	GO:0006812	GO:0008553	GO:0009414	GO:0009737	GO:0010119	GO:0015992	GO:0016021	GO:0019829	GO:0046872
gi_351617961_gb_JP472262.1	GO:0006807	GO:0008374	GO:0009653	GO:0009813	GO:0016043	GO:0016410	GO:0016740	GO:0044249	GO:0048731
gi_351617965_gb_JP472266.1	GO:0000038	GO:0001949	GO:0005506	GO:0005515	GO:0005739	GO:0005783	GO:0006633	GO:0006891	GO:0006944	GO:0009809	GO:0010224	GO:0016020	GO:0016021	GO:0030258	GO:0032286	GO:0032287	GO:0042127	GO:0042634	GO:0043069	GO:0046424	GO:0055114	GO:0080132
gi_351618007_gb_JP472308.1	GO:0005739	GO:0006098	GO:0006364	GO:0009534	GO:0009706	GO:0010027	GO:0010207	GO:0015995	GO:0019288
gi_351618034_gb_JP472335.1	GO:0005488	GO:0006952	GO:0044464
gi_351618051_gb_JP472352.1	GO:0003006	GO:0004871	GO:0005886	GO:0009416	GO:0009606	GO:0009637	GO:0009888	GO:0009932	GO:0048513	GO:0048588	GO:0050789
gi_351618078_gb_JP472379.1	GO:0003723	GO:0009507	GO:0030529
gi_351618091_gb_JP472392.1	GO:0004034	GO:0006012	GO:0009570	GO:0030246	GO:0048046
gi_351618105_gb_JP472406.1	GO:0005576	GO:0006950	GO:0008152	GO:0030599	GO:0043086	GO:0046910	GO:0050789
gi_351618111_gb_JP472412.1	GO:0003677	GO:0003700	GO:0005634	GO:0006355	GO:0006546	GO:0006636	GO:0006733	GO:0006766	GO:0006783	GO:0007623	GO:0009073	GO:0009106	GO:0009108	GO:0009117	GO:0009409	GO:0009585	GO:0009641	GO:0009684	GO:0009686	GO:0009693	GO:0009695	GO:0009704	GO:0009740	GO:0009753	GO:0009959	GO:0009965	GO:0010047	GO:0010100	GO:0010154	GO:0010161	GO:0010187	GO:0010313	GO:0010600	GO:0010928	GO:0015995	GO:0016043	GO:0019288	GO:0019344	GO:0019761	GO:0030003	GO:0031539	GO:0042802	GO:0045893	GO:0048440	GO:0048446	GO:0048608	GO:0051704	GO:0071554	GO:0080147
gi_351618141_gb_JP472442.1	GO:0005739	GO:0005778	GO:0016021	GO:0016043	GO:0050794	GO:0072593
gi_351618144_gb_JP472445.1	GO:0005634	GO:0006952	GO:0009507	GO:0009607	GO:0010035	GO:0016068	GO:0030003	GO:0070838
gi_351618155_gb_JP472456.1	GO:0005773
gi_351618166_gb_JP472467.1	GO:0005794	GO:0009505	GO:0009506	GO:0040007	GO:0046658	GO:0071704
gi_351618216_gb_JP472517.1	GO:0004017	GO:0005524	GO:0006354	GO:0009570	GO:0010155	GO:0016117	GO:0046777	GO:0046939
gi_351618243_gb_JP472544.1	GO:0003700	GO:0005488	GO:0005634	GO:0006355	GO:0009414	GO:0009737	GO:0009791	GO:0016161	GO:0042538	GO:0044444	GO:0048608	GO:0048831
gi_351618272_gb_JP472573.1	GO:0000165	GO:0001558	GO:0002237	GO:0004672	GO:0005739	GO:0005783	GO:0005886	GO:0006259	GO:0009505	GO:0009506	GO:0009556	GO:0009611	GO:0009664	GO:0009753	GO:0009755	GO:0009790	GO:0009814	GO:0009909	GO:0009944	GO:0009965	GO:0010073	GO:0010103	GO:0010148	GO:0010234	GO:0016570	GO:0016772	GO:0019222	GO:0030155	GO:0033612	GO:0033993	GO:0034645	GO:0038023	GO:0042277	GO:0042742	GO:0043414	GO:0048281	GO:0048509	GO:0050832	GO:0051302	GO:0097305	GO:2000027
gi_351618280_gb_JP472581.1	GO:0045735
gi_351618302_gb_JP472603.1	GO:0000038	GO:0000271	GO:0004091	GO:0006629	GO:0007389	GO:0008361	GO:0009664	GO:0009825	GO:0009832	GO:0009926	GO:0009932	GO:0016298	GO:0042335	GO:0043481	GO:0048046	GO:0048767
gi_351618314_gb_JP472615.1	GO:0005524	GO:0005634	GO:0008887	GO:0009570	GO:0009853	GO:0009941	GO:0016310
gi_351618335_gb_JP472636.1	GO:0000271	GO:0003700	GO:0004674	GO:0005524	GO:0005634	GO:0005829	GO:0005886	GO:0005983	GO:0006468	GO:0007020	GO:0007169	GO:0009414	GO:0009507	GO:0009825	GO:0009932	GO:0009934	GO:0010075	GO:0010480	GO:0010817	GO:0016161	GO:0033612	GO:0043169	GO:0043481	GO:0043621	GO:0048229	GO:0048767	GO:0048831	GO:0071555	GO:0080027
gi_351618354_gb_JP472655.1	GO:0003924	GO:0005524	GO:0005737	GO:0006184	GO:0016021	GO:0016151	GO:0016530	GO:0042803	GO:0048554
gi_351618356_gb_JP472657.1	GO:0005739	GO:0009055	GO:0009535	GO:0009941	GO:0015035	GO:0019684	GO:0035304	GO:0045454
gi_351618359_gb_JP472660.1	GO:0006944	GO:0008168	GO:0032259	GO:0048193
gi_351618360_gb_JP472661.1	GO:0004364	GO:0004462	GO:0005634	GO:0005737	GO:0005829	GO:0005886	GO:0006635	GO:0006979	GO:0008152	GO:0009407	GO:0009506	GO:0009507	GO:0009694	GO:0009751	GO:0009753	GO:0010043	GO:0010583	GO:0019899	GO:0042430	GO:0043161	GO:0043295	GO:0044249	GO:0044262	GO:0046482	GO:0046686	GO:0048046	GO:0051788	GO:0080129	GO:2000030
gi_351618361_gb_JP472662.1	GO:0005634
gi_351618362_gb_JP472663.1	GO:0005488	GO:0005634	GO:0005773	GO:0008104	GO:0009987	GO:0044446	GO:0050789
gi_351618378_gb_JP472679.1	GO:0004722	GO:0005634	GO:0005886	GO:0006470	GO:0006970	GO:0009409	GO:0009507	GO:0009611	GO:0009738	GO:0010440	GO:0016043	GO:0035556	GO:0042742	GO:0044419	GO:0046872	GO:0048046	GO:0048481	GO:0048588	GO:0050832	GO:0060560
gi_351618425_gb_JP472726.1	GO:0000271	GO:0005739	GO:0005768	GO:0005783	GO:0005794	GO:0005802	GO:0005886	GO:0009791	GO:0009833	GO:0009834	GO:0009863	GO:0009867	GO:0009873	GO:0010035	GO:0016020	GO:0016049	GO:0016759	GO:0019748	GO:0030244	GO:0042538	GO:0042742	GO:0044036	GO:0044237	GO:0044464	GO:0046482	GO:0048608	GO:0050832	GO:0052386
gi_351618440_gb_JP472741.1	GO:0004672	GO:0005524	GO:0005576	GO:0005829	GO:0005886	GO:0006073	GO:0006468	GO:0006793	GO:0006996	GO:0007049	GO:0007165	GO:0007389	GO:0009059	GO:0009411	GO:0009505	GO:0009506	GO:0009555	GO:0009620	GO:0009664	GO:0009741	GO:0009826	GO:0010073	GO:0010817	GO:0032991	GO:0040008	GO:0042802	GO:0043231	GO:0043412	GO:0044267	GO:0044446	GO:0046983	GO:0048518	GO:0048580	GO:0048657	GO:0097159
gi_351618451_gb_JP472752.1	GO:0006812	GO:0008324	GO:0015174	GO:0015802	GO:0016021	GO:0031090	GO:0044446
gi_351618512_gb_JP472813.1	GO:0000041	GO:0003700	GO:0003712	GO:0005634	GO:0005737	GO:0005773	GO:0005886	GO:0006623	GO:0008429	GO:0009737	GO:0009744	GO:0009910	GO:0009911	GO:0010030	GO:0010228	GO:0010229	GO:0030154	GO:0031982	GO:0046685	GO:0048510	GO:0048575	GO:0090344
gi_351618516_gb_JP472817.1	GO:0005737	GO:0043231	GO:0050896
gi_351618525_gb_JP472826.1	GO:0005515	GO:0005739	GO:0009506	GO:0009615	GO:0009626	GO:0010193	GO:0016043	GO:0044446
gi_351618564_gb_JP472865.1	GO:0004091	GO:0004104	GO:0004560	GO:0006629	GO:0009505	GO:0009506	GO:0009570	GO:0009832	GO:0010413	GO:0016298	GO:0016788	GO:0019863	GO:0045492	GO:0048046
gi_351618571_gb_JP472872.1	GO:0000166	GO:0000278	GO:0003006	GO:0003676	GO:0005515	GO:0005737	GO:0006325	GO:0006464	GO:0007399	GO:0012501	GO:0015630	GO:0016070	GO:0016246	GO:0016787	GO:0016905	GO:0022402	GO:0033043	GO:0042221	GO:0043234	GO:0043933	GO:0044430	GO:0044444	GO:0044451	GO:0048468	GO:0048513	GO:0048523	GO:0048646	GO:0051716	GO:0080090	GO:2000112
gi_351618590_gb_JP472891.1	GO:0005576	GO:0006508	GO:0006869	GO:0008233	GO:0008289	GO:0009506
gi_351618593_gb_JP472894.1	GO:0000165	GO:0001666	GO:0003677	GO:0003700	GO:0005634	GO:0006355	GO:0006612	GO:0008361	GO:0009409	GO:0009414	GO:0009416	GO:0009507	GO:0009611	GO:0009617	GO:0009695	GO:0009723	GO:0009733	GO:0009737	GO:0009738	GO:0009744	GO:0009825	GO:0009862	GO:0009867	GO:0009908	GO:0010150	GO:0010286	GO:0010363	GO:0030968	GO:0031348	GO:0042538	GO:0043069	GO:0043424	GO:0045893	GO:0046982	GO:0050832
gi_351618594_gb_JP472895.1	GO:0000166	GO:0000381	GO:0000932	GO:0003723	GO:0005634	GO:0006417	GO:0009845	GO:0009846
gi_351618617_gb_JP472918.1	GO:0007623	GO:0009706	GO:0016021
gi_351618626_gb_JP472927.1	GO:0005506	GO:0005737	GO:0006949	GO:0008199	GO:0009992	GO:0016044	GO:0016234	GO:0019310	GO:0019853	GO:0048016	GO:0050113	GO:0055114
gi_351618635_gb_JP472936.1	GO:0000165	GO:0002679	GO:0005576	GO:0005618	GO:0005773	GO:0006612	GO:0006944	GO:0009595	GO:0009615	GO:0009664	GO:0009697	GO:0009862	GO:0009867	GO:0009965	GO:0010075	GO:0010200	GO:0010224	GO:0010310	GO:0010363	GO:0016023	GO:0016787	GO:0030154	GO:0031225	GO:0031348	GO:0031540	GO:0034976	GO:0035304	GO:0042545	GO:0042742	GO:0043069	GO:0043900	GO:0045893	GO:0046686	GO:0048046	GO:0048653	GO:0050832	GO:0051707
gi_351618674_gb_JP472975.1	GO:0005488	GO:0005634	GO:0009507	GO:0016573	GO:0016740	GO:0090304
gi_351618701_gb_JP473002.1	GO:0009651	GO:0009685	GO:0016706	GO:0044249	GO:0052634	GO:0052635
gi_351618702_gb_JP473003.1	GO:0005515	GO:0005576	GO:0005739	GO:0005768	GO:0005794	GO:0005802	GO:0006857	GO:0009808	GO:0010054	GO:0010167	GO:0010413	GO:0015706	GO:0030775	GO:0045492
gi_351618712_gb_JP473013.1	GO:0044464
gi_351618718_gb_JP473019.1	GO:0005634	GO:0010089	GO:0044036
gi_351618741_gb_JP473042.1	GO:0004722	GO:0005515	GO:0005634	GO:0005794	GO:0005829	GO:0006469	GO:0006470	GO:0008287	GO:0009408	GO:0009409	GO:0009414	GO:0009610	GO:0009658	GO:0009788	GO:0009939	GO:0010030	GO:0010119	GO:0010150	GO:0010205	GO:0033106	GO:0042538	GO:0046872	GO:0048838
gi_351618765_gb_JP473066.1	GO:0000380	GO:0000386	GO:0000389	GO:0002119	GO:0003676	GO:0005730	GO:0005737	GO:0006886	GO:0007281	GO:0008270	GO:0008284	GO:0008340	GO:0009792	GO:0016607	GO:0018996	GO:0030532	GO:0030628	GO:0033554	GO:0040007	GO:0040011	GO:0040020	GO:0071013
gi_351618788_gb_JP473089.1	GO:0005524	GO:0005739	GO:0005774	GO:0005829	GO:0005886	GO:0006200	GO:0006612	GO:0006855	GO:0006995	GO:0009414	GO:0009506	GO:0009595	GO:0009697	GO:0009723	GO:0009738	GO:0009744	GO:0009749	GO:0009750	GO:0009817	GO:0009862	GO:0009867	GO:0009941	GO:0009963	GO:0010193	GO:0010200	GO:0010310	GO:0010363	GO:0015086	GO:0015416	GO:0015417	GO:0015439	GO:0015691	GO:0015692	GO:0016020	GO:0016021	GO:0016126	GO:0016132	GO:0019745	GO:0030003	GO:0031348	GO:0042299	GO:0042335	GO:0042344	GO:0042538	GO:0042626	GO:0042742	GO:0043069	GO:0043407	GO:0043900
gi_351618846_gb_JP473147.1	GO:0005576	GO:0006914	GO:0009506	GO:0016020	GO:0042742	GO:0071944
gi_351618895_gb_JP473196.1	GO:0001676	GO:0002213	GO:0004768	GO:0005215	GO:0005739	GO:0005789	GO:0005886	GO:0006636	GO:0006655	GO:0009507	GO:0009579	GO:0009979	GO:0010205	GO:0015995	GO:0016021	GO:0016117	GO:0016491	GO:0019288	GO:0031348	GO:0042761	GO:0046685
gi_351618920_gb_JP473221.1	GO:0004674	GO:0005488	GO:0005886	GO:0006811	GO:0007165	GO:0007389	GO:0008544	GO:0009617	GO:0009790	GO:0009814	GO:0009886	GO:0009887	GO:0010016	GO:0016301	GO:0040008	GO:0043231	GO:0043412	GO:0044238	GO:0044260	GO:0044444	GO:0048507	GO:0048608	GO:0048827	GO:0051301	GO:0071555	GO:2000026
gi_351618983_gb_JP473284.1	GO:0000166	GO:0003723	GO:0005634	GO:0005737	GO:0006396	GO:0010467	GO:0016070	GO:0016491	GO:0030529
gi_351619013_gb_JP473314.1	GO:0005783	GO:0009411	GO:0009733	GO:0009813	GO:0016036	GO:0016099	GO:0016102	GO:0016709	GO:0016711	GO:0019375	GO:0019825	GO:0031090	GO:0036202	GO:0042631	GO:0044425	GO:0046872	GO:0055114
gi_351619092_gb_JP473393.1	GO:0005515	GO:0005829	GO:0006950	GO:0009809	GO:0009821	GO:0009963	GO:0010167	GO:0010252	GO:0010345	GO:0010584	GO:0015706	GO:0016020	GO:0016413	GO:0047172	GO:0047203	GO:0047205	GO:0047672	GO:0050366	GO:0050734	GO:0052325	GO:0080072	GO:0080073	GO:0080074	GO:0080075	GO:0080088
gi_351619113_gb_JP473414.1	GO:0003677	GO:0003700	GO:0005634	GO:0006355	GO:0009718	GO:0009744	GO:0010224	GO:0019344	GO:0046983
gi_351619147_gb_JP473448.1	GO:0005198	GO:0009507
gi_351619193_gb_JP473494.1	GO:0000165	GO:0002237	GO:0004672	GO:0005886	GO:0006355	GO:0006487	GO:0006612	GO:0006944	GO:0009581	GO:0009595	GO:0009625	GO:0009697	GO:0009862	GO:0009867	GO:0010200	GO:0010310	GO:0010363	GO:0030246	GO:0030968	GO:0031348	GO:0031625	GO:0035304	GO:0042742	GO:0043069	GO:0043900	GO:0046777	GO:0050832
gi_351619239_gb_JP473540.1	GO:0005886	GO:0006813	GO:0009555	GO:0009674	GO:0015079	GO:0016020	GO:0016023	GO:0071805
gi_351619255_gb_JP473556.1	GO:0016787
gi_351619271_gb_JP473572.1	GO:0005886	GO:0006855	GO:0009636	GO:0009705	GO:0009723	GO:0010023	GO:0010231	GO:0015238	GO:0015297	GO:0015299	GO:0015691	GO:0015893	GO:0016020	GO:0051238	GO:0055085	GO:0071702
gi_351619274_gb_JP473575.1	GO:0008152	GO:0016787
gi_351619283_gb_JP473584.1	GO:0005634	GO:0006012	GO:0009408	GO:0009409	GO:0009414	GO:0009644	GO:0009651	GO:0009737	GO:0010325	GO:0015773	GO:0016051	GO:0042542	GO:0044444	GO:0046872	GO:0047216	GO:0052576	GO:0070417	GO:0071465
gi_351619288_gb_JP473589.1	GO:0005634	GO:0010089	GO:0044036
gi_351619289_gb_JP473590.1	GO:0005344	GO:0005506	GO:0005737	GO:0006631	GO:0009399	GO:0009735	GO:0015671	GO:0019432	GO:0019825	GO:0020037
gi_351619295_gb_JP473596.1	GO:0005737	GO:0006457	GO:0006950	GO:0009644	GO:0010286	GO:0034976	GO:0042542	GO:0051259
gi_351619300_gb_JP473601.1	GO:0009512	GO:0009535	GO:0015979	GO:0016021	GO:0016043	GO:0022900	GO:0044085	GO:0044237
gi_351619319_gb_JP473620.1	GO:0005618	GO:0005774	GO:0006084	GO:0006694	GO:0006816	GO:0007030	GO:0009651	GO:0016126	GO:0016132	GO:0046165	GO:0046658	GO:0048364	GO:0048367	GO:0048767
gi_351619338_gb_JP473639.1	GO:0005576	GO:0009506	GO:0009740	GO:0009744	GO:0009749	GO:0009750	GO:0009751	GO:0010162	GO:0010286	GO:0019344	GO:0044237	GO:0045454	GO:0071944	GO:0080167	GO:0097305
gi_351619343_gb_JP473644.1	GO:0010263	GO:0010686	GO:0019745	GO:0034074	GO:0034075	GO:0042299	GO:0042300	GO:0042335	GO:0042561	GO:0048364	GO:0051746	GO:0080003	GO:0080011	GO:0090438
gi_351619410_gb_JP473711.1	GO:0005634	GO:0009073	GO:0009535	GO:0009570	GO:0010275	GO:0016226
gi_351619442_gb_JP473743.1	GO:0005829	GO:0005886	GO:0008152	GO:0008967	GO:0016787	GO:0043167	GO:0044237	GO:0071704
gi_351619498_gb_JP473799.1	GO:0000304	GO:0003825	GO:0004805	GO:0005737	GO:0005992	GO:0005993	GO:0009267	GO:0009405	GO:0009414	GO:0009507	GO:0009611	GO:0009617	GO:0009620	GO:0009664	GO:0009695	GO:0009723	GO:0009733	GO:0009738	GO:0009793	GO:0009832	GO:0009867	GO:0010182	GO:0016102	GO:0031505	GO:0034605	GO:0036168	GO:0036170	GO:0036180	GO:0042538	GO:0051301	GO:0060257	GO:0070301	GO:0071470	GO:0080013	GO:0080027
gi_351619511_gb_JP473812.1	GO:0004040	GO:0016740	GO:0016884
gi_351619526_gb_JP473827.1	GO:0000287	GO:0005829	GO:0009408	GO:0009409	GO:0009570	GO:0009611	GO:0009625	GO:0009753	GO:0010334	GO:0016787	GO:0030145	GO:0033383	GO:0034008	GO:0034009	GO:0034768	GO:0043612	GO:0043693	GO:0045339	GO:0050551	GO:0050993	GO:0051762	GO:0052578	GO:0071485	GO:0080027
gi_351619530_gb_JP473831.1	GO:0000226	GO:0000911	GO:0006259	GO:0006346	GO:0006461	GO:0007010	GO:0009909	GO:0010468	GO:0022402	GO:0031048	GO:0034645	GO:0042127	GO:0043229	GO:0043231	GO:0043412	GO:0050794	GO:0051567
gi_351619546_gb_JP473847.1	GO:0009734	GO:0010114	GO:0010218
gi_351619565_gb_JP473866.1	GO:0003677	GO:0004612	GO:0005524	GO:0005634	GO:0005730	GO:0005737	GO:0005829	GO:0006094	GO:0006950	GO:0009817	GO:0009965	GO:0016020	GO:0016036	GO:0016301	GO:0016310	GO:0046686
gi_351619567_gb_JP473868.1	GO:0005509	GO:0005634	GO:0005739	GO:0009409	GO:0009909	GO:0010193	GO:0046872	GO:0048767	GO:0080164
gi_351619593_gb_JP473894.1	GO:0004674	GO:0004675	GO:0005524	GO:0005576	GO:0005634	GO:0005773	GO:0005886	GO:0006468	GO:0009506	GO:0009627	GO:0009697	GO:0009875	GO:0030246	GO:0031625	GO:0034976	GO:0046777
gi_351619662_gb_JP473963.1	GO:0000166	GO:0000186	GO:0000187	GO:0002229	GO:0004709	GO:0004712	GO:0005524	GO:0005730	GO:0005769	GO:0005783	GO:0005802	GO:0005829	GO:0007020	GO:0009414	GO:0009723	GO:0009788	GO:0015630	GO:0019901	GO:0042802	GO:0043065	GO:0043167	GO:0043507	GO:0044430	GO:0046777	GO:1900150	GO:1900424	GO:2000031
gi_351619706_gb_JP474007.1	GO:0005576	GO:0005768	GO:0005794	GO:0005802	GO:0006950	GO:0009269	GO:0009409	GO:0009628	GO:0009651	GO:0009737	GO:0016023	GO:0043231	GO:0044444	GO:0045735
gi_351619722_gb_JP474023.1	GO:0005515	GO:0005886	GO:0006662	GO:0006979	GO:0007154	GO:0009055	GO:0009408	GO:0009414	GO:0009506	GO:0009534	GO:0009570	GO:0009941	GO:0010188	GO:0015035	GO:0016043	GO:0016671	GO:0022900	GO:0045454	GO:0046686	GO:0048046	GO:0050832
gi_351619744_gb_JP474045.1	GO:0080167
gi_351619762_gb_JP474063.1	GO:0000785	GO:0005515	GO:0005634	GO:0005886	GO:0006261	GO:0006306	GO:0006342	GO:0009506	GO:0009909	GO:0009965	GO:0010093	GO:0010286	GO:0010314	GO:0016572	GO:0018024	GO:0030001	GO:0031047	GO:0044212	GO:0044444	GO:0046872	GO:0051567	GO:0051568
gi_351619771_gb_JP474072.1	GO:0000271	GO:0005576	GO:0005886	GO:0007389	GO:0008361	GO:0009814	GO:0009827	GO:0009926	GO:0009932	GO:0030570	GO:0031225	GO:0042547	GO:0043481	GO:0046658	GO:0048767
gi_351619773_gb_JP474074.1	GO:0002252	GO:0006629	GO:0009617	GO:0009626	GO:0009725	GO:0009863	GO:0016044	GO:0016787	GO:0031347	GO:0043067	GO:0048519	GO:0072330
gi_351619787_gb_JP474088.1	GO:0006950	GO:0008152	GO:0016020	GO:0016043	GO:0030599	GO:0043086	GO:0043231	GO:0044444	GO:0046910	GO:0050789	GO:0071702	GO:0071944
gi_351619807_gb_JP474108.1	GO:0004563	GO:0005764	GO:0005829	GO:0005886	GO:0005975	GO:0006027	GO:0006044	GO:0006665	GO:0006790	GO:0007399	GO:0009100	GO:0009505	GO:0016023	GO:0016231	GO:0019953	GO:0022414	GO:0030246	GO:0042803	GO:0043169	GO:0043436	GO:0044248	GO:0044249	GO:0046982	GO:0050877	GO:0065007
gi_351619820_gb_JP474121.1	GO:0005794	GO:0009505	GO:0009506	GO:0046658	GO:0048731	GO:0071840
gi_351619842_gb_JP474143.1	GO:0005794	GO:0005886	GO:0009505	GO:0009506	GO:0009834	GO:0016043	GO:0016049	GO:0031225	GO:0046658	GO:0048364	GO:0065008	GO:0071704
gi_351619846_gb_JP474147.1	GO:0005634	GO:0007165	GO:0007275	GO:0009653	GO:0009911	GO:0010228	GO:0016571	GO:0035257	GO:0042054	GO:0043229	GO:0050832
gi_351619868_gb_JP474169.1	GO:0004721	GO:0004722	GO:0005515	GO:0005634	GO:0005739	GO:0005886	GO:0006007	GO:0006470	GO:0006811	GO:0008152	GO:0009409	GO:0009414	GO:0009737	GO:0010193	GO:0030244	GO:0042538	GO:0050896
gi_351619887_gb_JP474188.1	GO:0005737	GO:0009860
gi_351619895_gb_JP474196.1	GO:0000166	GO:0003676	GO:0003723	GO:0010467	GO:0048731	GO:0050794
gi_351619910_gb_JP474211.1	GO:0003700	GO:0005515	GO:0005634	GO:0006333	GO:0006355	GO:0009737	GO:0009793	GO:0009845	GO:0009909	GO:0009933	GO:0009944	GO:0010027	GO:0010093	GO:0010103	GO:0010158	GO:0010159	GO:0010162	GO:0010228	GO:0010450	GO:0016226	GO:0048366	GO:0048481	GO:0048833
gi_351620046_gb_JP474347.1	GO:0004091	GO:0005576	GO:0006629	GO:0009507	GO:0009751	GO:0010103	GO:0010226	GO:0016556	GO:0016788	GO:0042538
gi_351620052_gb_JP474353.1	GO:0000023	GO:0005739	GO:0006098	GO:0009535	GO:0009817	GO:0009941	GO:0010207	GO:0010258	GO:0010598	GO:0016020	GO:0016117	GO:0016556	GO:0016655	GO:0019252	GO:0043085	GO:0044464
gi_351620069_gb_JP474370.1	GO:0005576	GO:0005618	GO:0006857	GO:0009651	GO:0016023	GO:0030145	GO:0031012	GO:0042350	GO:0045735	GO:0046872	GO:0050162	GO:0055114
gi_351620070_gb_JP474371.1	GO:0005634	GO:0009505
gi_351620096_gb_JP474397.1	GO:0004722	GO:0005515	GO:0005634	GO:0005794	GO:0005829	GO:0006469	GO:0006470	GO:0008287	GO:0009408	GO:0009409	GO:0009414	GO:0009610	GO:0009658	GO:0009788	GO:0010029	GO:0010119	GO:0010150	GO:0010162	GO:0010205	GO:0016787	GO:0033106	GO:0042538	GO:0044255	GO:0048518	GO:2000241
gi_351620120_gb_JP474421.1	GO:0005634	GO:0005737	GO:0009987	GO:0016773
gi_351620169_gb_JP474470.1	GO:0000166	GO:0002679	GO:0004672	GO:0004674	GO:0005576	GO:0005634	GO:0005773	GO:0005886	GO:0006612	GO:0006826	GO:0006944	GO:0006979	GO:0009506	GO:0009611	GO:0009863	GO:0009875	GO:0010106	GO:0010167	GO:0010200	GO:0010363	GO:0010413	GO:0015706	GO:0016310	GO:0019199	GO:0030246	GO:0031625	GO:0042742	GO:0043069	GO:0045492	GO:0046777	GO:0050832
gi_351620230_gb_JP474531.1	GO:0005488	GO:0005576	GO:0005886	GO:0005975	GO:0009653	GO:0016043	GO:0043231	GO:0044267	GO:0044444	GO:0048869	GO:0050896	GO:0071704
gi_351620271_gb_JP474572.1	GO:0005829	GO:0009854	GO:0016618	GO:0030267	GO:0047964	GO:0047995	GO:0051287	GO:0055114
gi_351620287_gb_JP474588.1	GO:0003677	GO:0003700	GO:0005488	GO:0005634	GO:0006355	GO:0009062	GO:0009694	GO:0009740	GO:0009753	GO:0009827	GO:0009860	GO:0009911	GO:0010162	GO:0048443	GO:0048446	GO:0048481	GO:0080147	GO:2000488
gi_351620385_gb_JP474686.1	GO:0005488
gi_351620394_gb_JP474695.1	GO:0000082	GO:0000122	GO:0003677	GO:0003682	GO:0005506	GO:0005634	GO:0005730	GO:0006333	GO:0006338	GO:0006355	GO:0007420	GO:0008094	GO:0008134	GO:0008270	GO:0009845	GO:0009911	GO:0016589	GO:0032454	GO:0033169	GO:0035064	GO:0035574	GO:0035575	GO:0043523	GO:0043565	GO:0045943	GO:0048703	GO:0051864	GO:0061188	GO:0070544	GO:0071557	GO:0071558
gi_351620398_gb_JP474699.1	GO:0000976	GO:0003700	GO:0005634	GO:0006355	GO:0009269	GO:0009409	GO:0009630	GO:0009637	GO:0009651	GO:0009739	GO:0009788	GO:0009965	GO:0010167	GO:0010228	GO:0015706	GO:0015996	GO:0042744	GO:0042803	GO:0043565	GO:0045893
gi_351620439_gb_JP474740.1	GO:0004568	GO:0005488	GO:0005576	GO:0005618	GO:0005634	GO:0006030	GO:0006032	GO:0006954	GO:0008843	GO:0009057	GO:0009651	GO:0009737	GO:0009753	GO:0010740	GO:0034612	GO:0035885	GO:0044238	GO:0044421	GO:0048513	GO:0051239
gi_351620444_gb_JP474745.1	GO:0000904	GO:0002021	GO:0002064	GO:0005216	GO:0005507	GO:0005739	GO:0005773	GO:0005777	GO:0005829	GO:0005886	GO:0005902	GO:0007423	GO:0009407	GO:0009570	GO:0009610	GO:0009753	GO:0009913	GO:0009941	GO:0010027	GO:0010043	GO:0010193	GO:0010583	GO:0010731	GO:0015630	GO:0016740	GO:0030003	GO:0032421	GO:0043295	GO:0043903	GO:0045174	GO:0048046	GO:0048519	GO:0050780	GO:0050794	GO:0050877	GO:0051716	GO:0051924	GO:0055114
gi_351620451_gb_JP474752.1	GO:0016021	GO:0055085
gi_351620456_gb_JP474757.1	GO:0009507
gi_351620471_gb_JP474772.1	GO:0006629	GO:0006952	GO:0008168	GO:0008757	GO:0009611	GO:0032259	GO:0044424	GO:0050896	GO:0051707	GO:0052624	GO:0072330	GO:0080150
gi_351620553_gb_JP474854.1	GO:0005737	GO:0006479	GO:0006744	GO:0008276
gi_351620563_gb_JP474864.1	GO:0000904	GO:0005515	GO:0006995	GO:0007165	GO:0009505	GO:0009506	GO:0009507	GO:0009725	GO:0009886	GO:0009932	GO:0010016	GO:0010054	GO:0016020	GO:0016301	GO:0043231	GO:0044237	GO:0044238	GO:0044444	GO:0048229	GO:0048443	GO:0048507	GO:0048588	GO:0048610	GO:0051704	GO:0071555	GO:0071669	GO:0071704	GO:2000026
gi_351620568_gb_JP474869.1	GO:0005515	GO:0005576	GO:0009860	GO:0010089	GO:0016787	GO:0044036
gi_351620640_gb_JP474941.1	GO:0005515	GO:0005737	GO:0006351	GO:0009277	GO:0019048	GO:0019219	GO:2000112
gi_351620751_gb_JP475052.1	GO:0000278	GO:0000724	GO:0003700	GO:0005515	GO:0005634	GO:0005777	GO:0005783	GO:0005886	GO:0006396	GO:0009410	GO:0009507	GO:0009556	GO:0009611	GO:0009630	GO:0009640	GO:0009651	GO:0010018	GO:0010025	GO:0010212	GO:0010345	GO:0010388	GO:0016567	GO:0016571	GO:0016579	GO:0016627	GO:0042753	GO:0042991	GO:0044255	GO:0044446	GO:0045893	GO:0050062	GO:0080019
gi_351620761_gb_JP475062.1	GO:0000271	GO:0000272	GO:0003700	GO:0004556	GO:0005509	GO:0005576	GO:0005634	GO:0005829	GO:0005886	GO:0005983	GO:0007020	GO:0009414	GO:0009507	GO:0009825	GO:0009932	GO:0009934	GO:0010075	GO:0010480	GO:0010817	GO:0016161	GO:0016301	GO:0033612	GO:0043169	GO:0043481	GO:0043621	GO:0048229	GO:0048767	GO:0048831	GO:0071555	GO:0080027
gi_351620762_gb_JP475063.1	GO:0004386	GO:0006259	GO:0097159
gi_351620814_gb_JP475115.1	GO:0004497	GO:0004499	GO:0009626	GO:0009627	GO:0009870	GO:0010204	GO:0016020	GO:0042742	GO:0043231	GO:0044237	GO:0044281	GO:0044444	GO:0050660	GO:0050661	GO:0050832	GO:0055114	GO:0071456
gi_351620836_gb_JP475137.1	GO:0005886	GO:0006812	GO:0006855	GO:0009062	GO:0009725	GO:0015238	GO:0015297	GO:0015299	GO:0015893	GO:0043226	GO:0055085	GO:0071702
gi_351620844_gb_JP475145.1	GO:0006098	GO:0009535	GO:0009773	GO:0010264	GO:0010598
gi_351620887_gb_JP475188.1	GO:0005634	GO:0005737	GO:0006457	GO:0006950	GO:0009644	GO:0009651	GO:0010286	GO:0034976	GO:0042542	GO:0045471	GO:0046685	GO:0046686	GO:0046688	GO:0051259
gi_351620896_gb_JP475197.1	GO:0005516	GO:0006098	GO:0009522	GO:0009535	GO:0009543	GO:0009773	GO:0015979	GO:0019344	GO:0030093	GO:0035304
gi_351620970_gb_JP475271.1	GO:0003824
gi_351621030_gb_JP475331.1	GO:0000165	GO:0002679	GO:0005618	GO:0005773	GO:0006612	GO:0006944	GO:0009595	GO:0009615	GO:0009664	GO:0009697	GO:0009862	GO:0009867	GO:0009965	GO:0010075	GO:0010200	GO:0010224	GO:0010310	GO:0010363	GO:0030154	GO:0031225	GO:0031348	GO:0031540	GO:0034976	GO:0035304	GO:0042545	GO:0042742	GO:0043069	GO:0043900	GO:0045893	GO:0046686	GO:0048046	GO:0048653	GO:0050832	GO:0051707
gi_351621046_gb_JP475347.1	GO:0003677	GO:0003700	GO:0005515	GO:0006355	GO:0006366	GO:0009414	GO:0009567	GO:0009738	GO:0009785	GO:0009790	GO:0010262	GO:0016036	GO:0016602	GO:0019375	GO:0044281	GO:0045892	GO:0045893	GO:0048316	GO:0048510	GO:0055046
gi_351621082_gb_JP475383.1	GO:0005886	GO:0006812	GO:0006855	GO:0006863	GO:0009705	GO:0009835	GO:0010023	GO:0010231	GO:0015238	GO:0015297	GO:0015299	GO:0015893	GO:0055085
gi_351621113_gb_JP475414.1	GO:0000271	GO:0005618	GO:0005730	GO:0005739	GO:0005819	GO:0005886	GO:0009524	GO:0009718	GO:0009744	GO:0009825	GO:0009855	GO:0009886	GO:0009887	GO:0009908	GO:0009932	GO:0010014	GO:0010073	GO:0010224	GO:0010817	GO:0016023	GO:0043481	GO:0045010	GO:0048767	GO:0051015	GO:0051016	GO:0071555
gi_351621123_gb_JP475424.1	GO:0004553	GO:0005618	GO:0005794	GO:0006073	GO:0009408	GO:0009409	GO:0009505	GO:0009507	GO:0009611	GO:0009612	GO:0009664	GO:0009733	GO:0009741	GO:0010089	GO:0010200	GO:0010411	GO:0016762	GO:0033946	GO:0042545	GO:0048046	GO:0048765	GO:0080022	GO:0080039
gi_351621143_gb_JP475444.1	GO:0005515	GO:0005634	GO:0005737	GO:0016020	GO:0016043	GO:0030246	GO:0050877	GO:0071944
gi_351621242_gb_JP475543.1	GO:0004553	GO:0005576	GO:0005886	GO:0005975	GO:0006826	GO:0006879	GO:0009845	GO:0009855	GO:0009944	GO:0010014	GO:0010075	GO:0010106	GO:0010167	GO:0010413	GO:0015137	GO:0015706	GO:0016023	GO:0016036	GO:0016985	GO:0019375	GO:0043169	GO:0045492	GO:0045892	GO:0071281	GO:0071369	GO:0071732
gi_351621251_gb_JP475552.1	GO:0005634	GO:0006826	GO:0009555	GO:0009860	GO:0010043	GO:0010233	GO:0030410	GO:0030418	GO:0071281	GO:0071369	GO:0071732
gi_351621283_gb_JP475584.1	GO:0005315	GO:0005355	GO:0005739	GO:0005774	GO:0005886	GO:0006007	GO:0006863	GO:0007033	GO:0007276	GO:0009507	GO:0009528	GO:0009534	GO:0009553	GO:0009624	GO:0009643	GO:0009670	GO:0009744	GO:0009749	GO:0009790	GO:0009941	GO:0010109	GO:0010152	GO:0015120	GO:0015121	GO:0015152	GO:0015297	GO:0015713	GO:0015714	GO:0015760	GO:0016021	GO:0019344	GO:0019684	GO:0034389	GO:0035304	GO:0035436	GO:0071917	GO:0080167
gi_351621298_gb_JP475599.1	GO:0006952	GO:0007154	GO:0009058	GO:0009410	GO:0009640	GO:0009793	GO:0009845	GO:0009855	GO:0009909	GO:0009944	GO:0010014	GO:0010075	GO:0010162	GO:0010182	GO:0010228	GO:0014070	GO:0016070	GO:0016458	GO:0016567	GO:0016779	GO:0019915	GO:0031323	GO:0035194	GO:0048513	GO:0048522	GO:0050826	GO:0051707	GO:0071310
gi_351621328_gb_JP475629.1	GO:0000186	GO:0000271	GO:0002237	GO:0003002	GO:0004672	GO:0004709	GO:0005515	GO:0005524	GO:0005886	GO:0005982	GO:0006355	GO:0006612	GO:0006952	GO:0006996	GO:0008544	GO:0009507	GO:0009605	GO:0009617	GO:0009628	GO:0009755	GO:0009960	GO:0009963	GO:0010014	GO:0010016	GO:0010030	GO:0010051	GO:0010075	GO:0010102	GO:0010103	GO:0010363	GO:0010817	GO:0016020	GO:0016021	GO:0016049	GO:0022402	GO:0030154	GO:0032440	GO:0044085	GO:0045490	GO:0046777	GO:0048366	GO:0048443	GO:0048508	GO:0048653	GO:0055114	GO:0060560	GO:0071555	GO:0071669	GO:2000034
gi_351621467_gb_JP475768.1	GO:0005576	GO:0005739	GO:0005794	GO:0005829	GO:0005886	GO:0005975	GO:0008810	GO:0009505	GO:0009506	GO:0009507	GO:0009624	GO:0009664	GO:0009835	GO:0009855	GO:0009944	GO:0010014	GO:0010051	GO:0010089	GO:0010093	GO:0016023	GO:0030245	GO:0042547	GO:0044036	GO:0048440
gi_351621474_gb_JP475775.1	GO:0004553	GO:0005737	GO:0005886	GO:0005986	GO:0006012	GO:0006979	GO:0009414	GO:0009507	GO:0009737	GO:0016301	GO:0019593	GO:0033532	GO:0047268	GO:0047274	GO:0080167
gi_351621510_gb_JP475811.1	GO:0008152	GO:0052692
gi_351621532_gb_JP475833.1	GO:0000165	GO:0003677	GO:0003700	GO:0005516	GO:0005634	GO:0005737	GO:0006355	GO:0006612	GO:0007062	GO:0009410	GO:0009697	GO:0009862	GO:0009867	GO:0009909	GO:0010200	GO:0010310	GO:0010363	GO:0016045	GO:0030968	GO:0031048	GO:0031348	GO:0035304	GO:0042742	GO:0043069	GO:0043900	GO:0045132	GO:0045893	GO:0048451	GO:0048453	GO:0050832
gi_351621557_gb_JP475858.1	GO:0005217	GO:0005230	GO:0005262	GO:0005515	GO:0005634	GO:0006810	GO:0006816	GO:0006874	GO:0007154	GO:0008066	GO:0009416	GO:0009630	GO:0016020	GO:0045087	GO:0050896	GO:0071230
gi_351621562_gb_JP475863.1	GO:0000272	GO:0004553	GO:0005576	GO:0005618	GO:0010413	GO:0031176	GO:0045492	GO:0045493
gi_351621599_gb_JP475900.1	GO:0005774	GO:0006084	GO:0006816	GO:0007030	GO:0009505	GO:0009651	GO:0009664	GO:0016126	GO:0016132	GO:0046658	GO:0048046	GO:0048367	GO:0048767
gi_351621674_gb_JP475975.1	GO:0000038	GO:0006655	GO:0009535	GO:0009539	GO:0009570	GO:0009654	GO:0009842	GO:0010207	GO:0019288	GO:0042335
gi_351621722_gb_JP476023.1	GO:0005253	GO:0005886	GO:0009705	GO:0010044	GO:0010118	GO:0012505	GO:0015140	GO:0015743	GO:0071423
gi_351621748_gb_JP476049.1	GO:0003677	GO:0003682	GO:0003700	GO:0005634	GO:0005829	GO:0006355	GO:0006950	GO:0009630	GO:0009793	GO:0009908	GO:0010114	GO:0010286	GO:0048262
gi_351621809_gb_JP476110.1	GO:0005488
gi_351621839_gb_JP476140.1	GO:0005886	GO:0009414	GO:0009624	GO:0009630	GO:0009705	GO:0010043	GO:0010540	GO:0016021	GO:0022821	GO:0048364	GO:0055069	GO:0055085	GO:0080167	GO:0090333
gi_351621843_gb_JP476144.1	GO:0042221	GO:0043231	GO:0043232	GO:0043412	GO:0044267	GO:0044444	GO:0046872
gi_351621883_gb_JP476184.1	GO:0007275	GO:0048856
gi_351621889_gb_JP476190.1	GO:0000166	GO:0000776	GO:0000779	GO:0000919	GO:0003777	GO:0005634	GO:0005819	GO:0005874	GO:0007059	GO:0007088	GO:0007112	GO:0007389	GO:0008104	GO:0008283	GO:0009506	GO:0009524	GO:0009555	GO:0009558	GO:0010245	GO:0010583	GO:0015630	GO:0016572	GO:0016939	GO:0017048	GO:0035720	GO:0043234	GO:0044430	GO:0044458	GO:0048522	GO:0051640	GO:0065008	GO:0090307	GO:0097014
gi_351621890_gb_JP476191.1	GO:0000271	GO:0005576	GO:0007389	GO:0008361	GO:0009814	GO:0009827	GO:0009926	GO:0009932	GO:0030570	GO:0031225	GO:0042547	GO:0043481	GO:0046658	GO:0048767
gi_351621904_gb_JP476205.1	GO:0000041	GO:0005576	GO:0005739	GO:0009860	GO:0016023
gi_351621906_gb_JP476207.1	GO:0004089	GO:0005262	GO:0005388	GO:0005516	GO:0005576	GO:0005737	GO:0005783	GO:0005886	GO:0006816	GO:0006882	GO:0009570	GO:0009624	GO:0009706	GO:0016023	GO:0016656	GO:0046872
gi_351621912_gb_JP476213.1	GO:0000166	GO:0001666	GO:0004022	GO:0005829	GO:0005886	GO:0008270	GO:0009651	GO:0009862	GO:0010310	GO:0045333	GO:0046686	GO:0051903
gi_351621914_gb_JP476215.1	GO:0000293	GO:0001932	GO:0005747	GO:0005886	GO:0006096	GO:0006511	GO:0006833	GO:0006972	GO:0007030	GO:0007420	GO:0008137	GO:0009631	GO:0009651	GO:0009853	GO:0019933	GO:0022900	GO:0022904	GO:0032981	GO:0044281	GO:0046686	GO:0048146	GO:0050897	GO:0051591	GO:0051788	GO:0072593	GO:0080129
gi_351621925_gb_JP476226.1	GO:0044464	GO:0050896
gi_351621943_gb_JP476244.1	GO:0005576	GO:0006869	GO:0006952	GO:0008289	GO:0009607	GO:0051704
gi_351621955_gb_JP476256.1	GO:0003700	GO:0005515	GO:0005634	GO:0005829	GO:0007155	GO:0009416	GO:0009722	GO:0009723	GO:0010089	GO:0010090	GO:0010413	GO:0016023	GO:0043565	GO:0045010	GO:0045492	GO:0045892	GO:0048765	GO:0071345	GO:0071555	GO:2000652
gi_351621965_gb_JP476266.1	GO:0005634
gi_351621991_gb_JP476292.1	GO:0005199	GO:0005576	GO:0005829	GO:0006949	GO:0009505	GO:0009506	GO:0009507	GO:0009739	GO:0009826	GO:0009828	GO:0009831	GO:0010114	GO:0010119	GO:0016020	GO:0016023	GO:0046685
gi_351621992_gb_JP476293.1	GO:0003824
gi_351622069_gb_JP476370.1	GO:0005794	GO:0006024	GO:0008194	GO:0008375	GO:0016021	GO:0016051	GO:0030158	GO:0030166	GO:0043436	GO:0044272	GO:0048856	GO:0050896
gi_351622082_gb_JP476383.1	GO:0000271	GO:0005515	GO:0005634	GO:0005886	GO:0005887	GO:0005938	GO:0006833	GO:0006896	GO:0007389	GO:0008361	GO:0009062	GO:0009507	GO:0009651	GO:0009705	GO:0009734	GO:0009750	GO:0009825	GO:0009834	GO:0009926	GO:0009932	GO:0010075	GO:0032973	GO:0034639	GO:0043090	GO:0043481	GO:0048767	GO:0051453	GO:0071555	GO:0080144	GO:0080171	GO:0090355	GO:0090358
gi_351622096_gb_JP476397.1	GO:0000166	GO:0000272	GO:0004672	GO:0004674	GO:0005524	GO:0005576	GO:0005739	GO:0005774	GO:0005982	GO:0006084	GO:0006468	GO:0006865	GO:0007020	GO:0007169	GO:0007389	GO:0008361	GO:0009505	GO:0009506	GO:0009610	GO:0009664	GO:0009737	GO:0009832	GO:0009860	GO:0009888	GO:0009926	GO:0010015	GO:0010075	GO:0010089	GO:0016020	GO:0016126	GO:0016132	GO:0016310	GO:0016491	GO:0022625	GO:0040008	GO:0042545	GO:0044036	GO:0044260	GO:0045177	GO:0046658	GO:0071944	GO:2000605
gi_351622182_gb_JP476483.1	GO:0005634	GO:0010263	GO:0010686	GO:0016126	GO:0019745	GO:0034074	GO:0034075	GO:0042299	GO:0042300	GO:0042335	GO:0042561	GO:0048364	GO:0051746	GO:0080003	GO:0080011	GO:0090438
gi_351622215_gb_JP476516.1	GO:0009791	GO:0043231	GO:0044444	GO:0048608
gi_351622237_gb_JP476538.1	GO:0006950	GO:0009535	GO:0031072
gi_351622271_gb_JP476572.1	GO:0003156	GO:0005886	GO:0006812	GO:0006855	GO:0009624	GO:0009725	GO:0015238	GO:0015297	GO:0015299	GO:0015893	GO:0017119	GO:0043226	GO:0055072	GO:0055085	GO:0071702
gi_351622303_gb_JP476604.1	GO:0005315	GO:0005739	GO:0006007	GO:0006863	GO:0007033	GO:0009534	GO:0009553	GO:0009624	GO:0009643	GO:0009670	GO:0009790	GO:0010152	GO:0015120	GO:0015121	GO:0015152	GO:0015297	GO:0015713	GO:0015714	GO:0015760	GO:0016021	GO:0019344	GO:0019684	GO:0031969	GO:0034389	GO:0035304	GO:0035436	GO:0071917
gi_351622315_gb_JP476616.1	GO:0000156	GO:0003677	GO:0003700	GO:0005634	GO:0005739	GO:0006281	GO:0007623	GO:0008270	GO:0009266	GO:0009637	GO:0009644	GO:0009658	GO:0009744	GO:0009909	GO:0009987	GO:0010018	GO:0010100	GO:0010155	GO:0010161	GO:0010229	GO:0032880	GO:0042752	GO:0042802	GO:0045892	GO:0048576	GO:0048579
gi_351622319_gb_JP476620.1	GO:0006810
gi_351622331_gb_JP476632.1	GO:0006098	GO:0009535	GO:0009658	GO:0009773	GO:0015995	GO:0045893	GO:0080167
gi_351622388_gb_JP476689.1	GO:0000122	GO:0003677	GO:0003682	GO:0003700	GO:0005515	GO:0005634	GO:0006338	GO:0007596	GO:0009751	GO:0009987	GO:0031523	GO:0045624	GO:0045944	GO:0051571	GO:0051574	GO:0090307
gi_351622440_gb_JP476741.1	GO:0000125	GO:0000394	GO:0003677	GO:0003700	GO:0003713	GO:0004402	GO:0005488	GO:0005634	GO:0005669	GO:0006366	GO:0006367	GO:0006368	GO:0008134	GO:0009736	GO:0009867	GO:0010104	GO:0016032	GO:0030914	GO:0033276	GO:0043966	GO:0051091
gi_351622479_gb_JP476780.1	GO:0001817	GO:0005515	GO:0007165	GO:0015630	GO:0016020	GO:0030154	GO:0043231	GO:0044430	GO:0044444	GO:0048523	GO:0048731	GO:0060918
gi_351622575_gb_JP476876.1	GO:0002100	GO:0005829	GO:0005886	GO:0008152	GO:0008251	GO:0008270	GO:0009507	GO:0016787	GO:0043167
gi_351622592_gb_JP476893.1	GO:0007154	GO:0009628	GO:0016757	GO:0019752	GO:0033554	GO:0035251	GO:0044424	GO:0050794	GO:0071310
gi_351622627_gb_JP476928.1	GO:0005739	GO:0006631	GO:0009409	GO:0009414	GO:0009416	GO:0009611	GO:0009620	GO:0009651	GO:0009695	GO:0009706	GO:0009707	GO:0009735	GO:0009739	GO:0009753	GO:0009790	GO:0010027	GO:0016036	GO:0019375	GO:0030246	GO:0030259	GO:0030912	GO:0045892	GO:0046509
gi_351622628_gb_JP476929.1	GO:0004471	GO:0004473	GO:0005524	GO:0005759	GO:0006090	GO:0006096	GO:0006108	GO:0006833	GO:0006972	GO:0007030	GO:0008270	GO:0008948	GO:0009266	GO:0009507	GO:0009651	GO:0010033	GO:0016619	GO:0016652	GO:0030145	GO:0042803	GO:0046686	GO:0050897	GO:0051260	GO:0051287	GO:0055114
gi_351622632_gb_JP476933.1	GO:0000166	GO:0004672	GO:0004674	GO:0005516	GO:0005886	GO:0006457	GO:0006857	GO:0006952	GO:0009408	GO:0009506	GO:0009644	GO:0009987	GO:0010150	GO:0010193	GO:0034976	GO:0042542	GO:0043167	GO:0046777	GO:0050789
gi_351622653_gb_JP476954.1	GO:0003677	GO:0003700	GO:0005634	GO:0006355	GO:0009062	GO:0009694	GO:0009740	GO:0009753	GO:0009827	GO:0009860	GO:0009911	GO:0010162	GO:0048443	GO:0048446	GO:0048481	GO:0080147	GO:2000488
gi_351622676_gb_JP476977.1	GO:0000303	GO:0001523	GO:0001654	GO:0004028	GO:0004029	GO:0004043	GO:0005515	GO:0005759	GO:0005829	GO:0006066	GO:0006081	GO:0006554	GO:0006950	GO:0007605	GO:0009269	GO:0009651	GO:0009733	GO:0009737	GO:0009743	GO:0009873	GO:0015996	GO:0034641	GO:0034754	GO:0046394	GO:0048562	GO:0055114
gi_351622709_gb_JP477010.1	GO:0005794	GO:0005886	GO:0007020	GO:0007568	GO:0008361	GO:0009062	GO:0009506	GO:0009507	GO:0009611	GO:0009612	GO:0009693	GO:0009855	GO:0009926	GO:0009944	GO:0009956	GO:0010014	GO:0010015	GO:0010075	GO:0010200	GO:0010305	GO:0016021	GO:0019344	GO:0050832
gi_351622734_gb_JP477035.1	GO:0001501	GO:0005789	GO:0005840	GO:0005881	GO:0006006	GO:0006987	GO:0007009	GO:0009791	GO:0010259	GO:0016020	GO:0032024	GO:0045727	GO:0046622	GO:0048644	GO:0060124
gi_351622762_gb_JP477063.1	GO:0031225
gi_351622792_gb_JP477093.1	GO:0006952	GO:0007267	GO:0009553	GO:0010430	GO:0016614	GO:0044464	GO:0046202	GO:0046593	GO:0050660	GO:0050898
gi_351622804_gb_JP477105.1	GO:0005516	GO:0005794	GO:0005886	GO:0006952	GO:0007165	GO:0008219	GO:0009506	GO:0009607	GO:0009817	GO:0010033	GO:0016021	GO:0016043	GO:0031348	GO:0048588	GO:0048765	GO:0060560
gi_351622811_gb_JP477112.1	GO:0006364	GO:0009535	GO:0009637	GO:0009902	GO:0009941	GO:0010027	GO:0010114	GO:0010218	GO:0015979	GO:0030003	GO:0070838
gi_351622853_gb_JP477154.1	GO:0000280	GO:0004857	GO:0005618	GO:0005739	GO:0005773	GO:0005794	GO:0005829	GO:0005886	GO:0006457	GO:0006996	GO:0007000	GO:0008047	GO:0008152	GO:0009409	GO:0009506	GO:0009570	GO:0010188	GO:0010286	GO:0010497	GO:0016667	GO:0016671	GO:0042542	GO:0043085	GO:0043086	GO:0044444	GO:0046686	GO:0048046	GO:0050794	GO:0050832	GO:0051259
gi_351622863_gb_JP477164.1	GO:0005886	GO:0009658	GO:0009706	GO:0010027	GO:0030003	GO:0070838
gi_351622864_gb_JP477165.1	GO:0005506	GO:0005737	GO:0006949	GO:0008199	GO:0009992	GO:0016044	GO:0016234	GO:0019310	GO:0019853	GO:0048016	GO:0050113	GO:0055114
gi_351622908_gb_JP477209.1	GO:0004674	GO:0004675	GO:0005524	GO:0005576	GO:0005634	GO:0005773	GO:0005886	GO:0006468	GO:0006826	GO:0009506	GO:0009507	GO:0009627	GO:0009697	GO:0009875	GO:0010106	GO:0010167	GO:0010413	GO:0015706	GO:0030246	GO:0031625	GO:0034976	GO:0045492	GO:0046777
gi_351622987_gb_JP477288.1	GO:0000086	GO:0000132	GO:0000776	GO:0002009	GO:0002119	GO:0003777	GO:0004857	GO:0005737	GO:0005814	GO:0005829	GO:0005868	GO:0005875	GO:0005886	GO:0006260	GO:0006898	GO:0006914	GO:0007017	GO:0007290	GO:0007291	GO:0007476	GO:0008022	GO:0008039	GO:0008092	GO:0008180	GO:0008407	GO:0009792	GO:0010171	GO:0010467	GO:0016070	GO:0016459	GO:0019886	GO:0019899	GO:0019904	GO:0030235	GO:0030473	GO:0034454	GO:0035046	GO:0035071	GO:0035085	GO:0040010	GO:0040011	GO:0040020	GO:0040035	GO:0042127	GO:0042133	GO:0042326	GO:0042623	GO:0042803	GO:0043086
gi_351623033_gb_JP477334.1	GO:0005739	GO:0009535
gi_351623036_gb_JP477337.1	GO:0005576	GO:0005739	GO:0005794	GO:0005829	GO:0005886	GO:0005975	GO:0008810	GO:0009505	GO:0009506	GO:0009507	GO:0009624	GO:0009664	GO:0009855	GO:0009944	GO:0010014	GO:0010051	GO:0010089	GO:0010093	GO:0016023	GO:0030245	GO:0042547	GO:0044036	GO:0048440
gi_351623097_gb_JP477398.1	GO:0000041	GO:0006857	GO:0008271	GO:0008272	GO:0009506	GO:0009507	GO:0009684	GO:0009970	GO:0010167	GO:0015116	GO:0015291	GO:0015706	GO:0016021	GO:0019344	GO:0019761	GO:0030003	GO:0044459	GO:0055085	GO:0070838	GO:0080160
gi_351623109_gb_JP477410.1	GO:0005887	GO:0006612	GO:0006833	GO:0009624	GO:0009651	GO:0009750	GO:0009963	GO:0010363	GO:0015172	GO:0015174	GO:0015175	GO:0015399	GO:0015804	GO:0015809	GO:0015810	GO:0015827	GO:0016020	GO:0030003	GO:0043090	GO:0070838
gi_351623112_gb_JP477413.1	GO:0005509	GO:0006139	GO:0009523	GO:0009543	GO:0009654	GO:0010207	GO:0016556	GO:0019344	GO:0019684	GO:0019898	GO:0030095	GO:0043623
gi_351623117_gb_JP477418.1	GO:0004721	GO:0004722	GO:0005515	GO:0005634	GO:0005794	GO:0005829	GO:0005886	GO:0006469	GO:0006950	GO:0009408	GO:0009409	GO:0009414	GO:0009611	GO:0009628	GO:0009658	GO:0009723	GO:0009733	GO:0009737	GO:0009753	GO:0009788	GO:0009939	GO:0010030	GO:0010119	GO:0010150	GO:0010205	GO:0033106	GO:0042538	GO:0048838	GO:0050794
gi_351623142_gb_JP477443.1	GO:0004040	GO:0006487	GO:0006635	GO:0006869	GO:0006891	GO:0010351	GO:0016558	GO:0016874	GO:0016884
gi_351623166_gb_JP477467.1	GO:0005515	GO:0006098	GO:0006124	GO:0008198	GO:0009055	GO:0009570	GO:0009637	GO:0009644	GO:0009688	GO:0009744	GO:0009773	GO:0010114	GO:0010155	GO:0010207	GO:0010218	GO:0042742	GO:0046872	GO:0051537	GO:0080167
gi_351623168_gb_JP477469.1	GO:0003700	GO:0005634	GO:0006355
gi_351623232_gb_JP477533.1	GO:0000139	GO:0001654	GO:0002119	GO:0005525	GO:0005777	GO:0005886	GO:0006623	GO:0006888	GO:0007264	GO:0007281	GO:0007420	GO:0009414	GO:0009507	GO:0009631	GO:0009737	GO:0009792	GO:0009961	GO:0015031	GO:0019003	GO:0030742	GO:0032588	GO:0040007	GO:0040020	GO:0040022	GO:0042127	GO:0080115
gi_351623279_gb_JP477580.1	GO:0004601	GO:0005515	GO:0005634	GO:0006098	GO:0006364	GO:0006979	GO:0009535	GO:0009543	GO:0009637	GO:0010103	GO:0010114	GO:0010218	GO:0015995	GO:0016688	GO:0019252	GO:0019288	GO:0019684	GO:0019760	GO:0020037
gi_351623282_gb_JP477583.1	GO:0005488
gi_351623329_gb_JP477630.1	GO:0003333	GO:0005275	GO:0005886	GO:0006499	GO:0006612	GO:0006862	GO:0006888	GO:0006944	GO:0010363	GO:0015171	GO:0015172	GO:0015175	GO:0015696	GO:0015802	GO:0016021	GO:0030968	GO:0043069	GO:0043090	GO:0043269	GO:0080167
gi_351623392_gb_JP477693.1	GO:0005794	GO:0005829	GO:0009505	GO:0009506	GO:0009507	GO:0016020	GO:0046685
gi_351623413_gb_JP477714.1	GO:0004091	GO:0005488	GO:0005829	GO:0006952	GO:0008152	GO:0009628	GO:0009740	GO:0009791	GO:0009827	GO:0009860	GO:0014070	GO:0048513	GO:0048583	GO:0048608	GO:0052689	GO:0071702
gi_351623423_gb_JP477724.1	GO:0005515	GO:0009987	GO:0044464	GO:0045087
gi_351623433_gb_JP477734.1	GO:0005737	GO:0006950	GO:0007389	GO:0009628	GO:0009653	GO:0009987	GO:0048513
gi_351623450_gb_JP477751.1	GO:0005622	GO:0005634	GO:0006970	GO:0007623	GO:0008270	GO:0009658	GO:0009741	GO:0009909	GO:0010099	GO:0010161	GO:0010200	GO:0010218	GO:0010229	GO:0032879	GO:0042802	GO:0045892	GO:0046872	GO:0048576	GO:0048579	GO:0080167
gi_351623452_gb_JP477753.1	GO:0016020
gi_351623486_gb_JP477787.1	GO:0005634	GO:0005886	GO:0006355	GO:0006950	GO:0007623	GO:0009909	GO:0010018	GO:0010099	GO:0042802	GO:0046872	GO:0048518	GO:0048571	GO:0048572	GO:0048581	GO:0048585	GO:2000028
gi_351623497_gb_JP477798.1	GO:0000023	GO:0001666	GO:0001889	GO:0002576	GO:0003779	GO:0004332	GO:0005507	GO:0005618	GO:0005730	GO:0005740	GO:0005829	GO:0005886	GO:0006000	GO:0006094	GO:0006096	GO:0006098	GO:0006754	GO:0006941	GO:0007015	GO:0008360	GO:0009507	GO:0009651	GO:0009718	GO:0015629	GO:0015631	GO:0019252	GO:0030168	GO:0030388	GO:0031093	GO:0031674	GO:0042802	GO:0046686	GO:0046716	GO:0048046	GO:0051289	GO:0070061	GO:0070062	GO:0080167
gi_351623516_gb_JP477817.1	GO:0002376	GO:0004674	GO:0005634	GO:0005773	GO:0005886	GO:0006952	GO:0009506	GO:0009875	GO:0009987	GO:0010033	GO:0016044	GO:0016301	GO:0031625	GO:0043067	GO:0046777	GO:0051716
gi_351623544_gb_JP477845.1	GO:0009987	GO:0016301	GO:0016310	GO:0016773	GO:0044238	GO:0044464	GO:0071704
gi_351623568_gb_JP477869.1	GO:0006694	GO:0008170	GO:0008757	GO:0009507	GO:0009791	GO:0010189	GO:0032259	GO:0034641	GO:0042398	GO:0046165	GO:0050342	GO:0065007
gi_351623593_gb_JP477894.1	GO:0009507
gi_351623596_gb_JP477897.1	GO:0000023	GO:0000166	GO:0005777	GO:0005829	GO:0006098	GO:0008152	GO:0016491	GO:0016616	GO:0018130	GO:0019252	GO:0043085	GO:0044255	GO:0044271	GO:0046686	GO:0080167
gi_351623634_gb_JP477935.1	GO:0004674	GO:0005515	GO:0005524	GO:0005634	GO:0005829	GO:0005886	GO:0005985	GO:0006468	GO:0006511	GO:0006636	GO:0009414	GO:0009651	GO:0009738	GO:0009739	GO:0009789	GO:0009931	GO:0010029	GO:0010119	GO:0019432	GO:0040007	GO:0042742	GO:0042744	GO:0042752	GO:0048366	GO:0048527	GO:0070300	GO:0080022	GO:0080167	GO:2000377
gi_351623654_gb_JP477955.1	GO:0004857	GO:0005618	GO:0006820	GO:0006950	GO:0008152	GO:0016020	GO:0016043	GO:0030599	GO:0043086	GO:0043231	GO:0044444	GO:0050789	GO:0071702	GO:0071705
gi_351623681_gb_JP477982.1	GO:0005576
gi_351623685_gb_JP477986.1	GO:0005634	GO:0010263	GO:0010686	GO:0016126	GO:0019745	GO:0034074	GO:0034075	GO:0042299	GO:0042300	GO:0042335	GO:0042561	GO:0048364	GO:0051746	GO:0080003	GO:0080011	GO:0090438
gi_351623704_gb_JP478005.1	GO:0004672	GO:0006007	GO:0006811	GO:0006970	GO:0007059	GO:0007127	GO:0009506	GO:0009507	GO:0009617	GO:0009742	GO:0009791	GO:0009860	GO:0010038	GO:0010483	GO:0016324	GO:0031323	GO:0031347	GO:0033692	GO:0042546	GO:0043680	GO:0045087	GO:0045491	GO:0046777	GO:0046907	GO:0048765	GO:0050832	GO:0051276	GO:0051510	GO:0071669	GO:0090304	GO:0090404
gi_351623727_gb_JP478028.1	GO:0005488	GO:0006952	GO:0044464
gi_351623756_gb_JP478057.1	GO:0005737	GO:0006950	GO:0009733	GO:0009737	GO:0009793	GO:0009813	GO:0009830	GO:0009845	GO:0010035	GO:0010162	GO:0010260	GO:0016045	GO:0016682	GO:0016706	GO:0016740	GO:0019748	GO:0043167	GO:0044237	GO:0045431	GO:0080167
gi_351623766_gb_JP478067.1	GO:0005634	GO:0009649	GO:0009909	GO:0010017	GO:0010114	GO:0042753	GO:0042803	GO:0048573	GO:0080167
gi_351623809_gb_JP478110.1	GO:0000904	GO:0005509	GO:0005777	GO:0007165	GO:0009567	GO:0009617	GO:0009627	GO:0009719	GO:0009847	GO:0016044	GO:0031521	GO:0033554	GO:0043067	GO:0043581	GO:0044237	GO:0045088	GO:0046686	GO:0048519	GO:0051606	GO:0051726	GO:0071310
gi_351623829_gb_JP478130.1	GO:0000041	GO:0002215	GO:0004601	GO:0005515	GO:0005618	GO:0005774	GO:0005794	GO:0005829	GO:0006979	GO:0009651	GO:0009684	GO:0009809	GO:0009908	GO:0020037	GO:0042742	GO:0045926	GO:0046872	GO:0048046	GO:0055114
gi_351623830_gb_JP478131.1	GO:0007059	GO:0007127	GO:0009965	GO:0016556	GO:0030154	GO:0043231	GO:0044444	GO:0045893	GO:0051276
gi_351623872_gb_JP478173.1	GO:0003676	GO:0009908	GO:0044424	GO:0048262
gi_351623888_gb_JP478189.1	GO:0000096	GO:0001872	GO:0006996	GO:0008652	GO:0009069	GO:0009505	GO:0009506	GO:0009664	GO:0009740	GO:0010162	GO:0010468	GO:0016787	GO:0043231	GO:0044260	GO:0044444	GO:0046658	GO:0052543
gi_351623898_gb_JP478199.1	GO:0000041	GO:0003700	GO:0003712	GO:0005634	GO:0005773	GO:0005886	GO:0006623	GO:0008429	GO:0009737	GO:0009744	GO:0009910	GO:0009911	GO:0010030	GO:0010229	GO:0030154	GO:0031982	GO:0046685	GO:0048510	GO:0048573	GO:0048575	GO:0090344
gi_351623922_gb_JP478223.1	GO:0005739	GO:0006479	GO:0006744	GO:0008276
gi_351623929_gb_JP478230.1	GO:0005576	GO:0009505	GO:0080167
gi_351623933_gb_JP478234.1	GO:0005488	GO:0006810	GO:0006979	GO:0009535	GO:0009611	GO:0031977	GO:0044238	GO:0044444	GO:0048523	GO:0071704
gi_351623943_gb_JP478244.1	GO:0006811	GO:0009416	GO:0009605	GO:0009753	GO:0009791	GO:0009805	GO:0009813	GO:0010421	GO:0016043	GO:0016706	GO:0048731	GO:0055114
gi_351623957_gb_JP478258.1	GO:0009699	GO:0009733	GO:0009737	GO:0009793	GO:0009813	GO:0009830	GO:0009845	GO:0010035	GO:0010162	GO:0010260	GO:0016045	GO:0016706	GO:0018130	GO:0033554	GO:0043167	GO:0045431	GO:0071704	GO:0080167
gi_351623962_gb_JP478263.1	GO:0009535	GO:0009637	GO:0010155	GO:0030003	GO:0046777	GO:0070838
gi_351623983_gb_JP478284.1	GO:0004721	GO:0004722	GO:0005515	GO:0005634	GO:0005794	GO:0005829	GO:0006469	GO:0009408	GO:0009409	GO:0009414	GO:0009658	GO:0009788	GO:0009908	GO:0009939	GO:0010030	GO:0010119	GO:0010150	GO:0010205	GO:0010374	GO:0033106	GO:0042538	GO:0044255	GO:0048838
gi_351623999_gb_JP478300.1	GO:0000166	GO:0000235	GO:0001578	GO:0003002	GO:0005634	GO:0005813	GO:0005875	GO:0005915	GO:0006260	GO:0006342	GO:0006793	GO:0006950	GO:0007019	GO:0007100	GO:0007127	GO:0008017	GO:0008283	GO:0008544	GO:0008569	GO:0008574	GO:0009725	GO:0009792	GO:0009987	GO:0010016	GO:0015630	GO:0016020	GO:0016570	GO:0016887	GO:0017111	GO:0019752	GO:0031534	GO:0032837	GO:0032888	GO:0042803	GO:0043234	GO:0043414	GO:0044255	GO:0044262	GO:0044430	GO:0045218	GO:0048438	GO:0048449	GO:0050896	GO:0051052	GO:0051258	GO:0051298	GO:0051301	GO:0051716	GO:0065008
gi_351624031_gb_JP478332.1	GO:0005694	GO:0005730	GO:0005739
gi_351624042_gb_JP478343.1	GO:0003984	GO:0005618	GO:0005829	GO:0005886	GO:0006094	GO:0006551	GO:0006573	GO:0007010	GO:0009082	GO:0009097	GO:0009099	GO:0009507	GO:0010498	GO:0016597	GO:0040007
gi_351624052_gb_JP478353.1	GO:0009507	GO:0016020
gi_351624059_gb_JP478360.1	GO:0004725	GO:0005515	GO:0005576	GO:0005886	GO:0006470	GO:0009570	GO:0035335	GO:0044003	GO:0044424
gi_351624080_gb_JP478381.1	GO:0004751	GO:0009052	GO:0009507	GO:0009987	GO:0016556
gi_351624107_gb_JP478408.1	GO:0004672	GO:0005488	GO:0005576	GO:0005618	GO:0009987
gi_351624143_gb_JP478444.1	GO:0004047	GO:0004375	GO:0005524	GO:0005634	GO:0005739	GO:0005960	GO:0006098	GO:0006364	GO:0009409	GO:0009507	GO:0009579	GO:0009657	GO:0009697	GO:0009744	GO:0009749	GO:0009750	GO:0009814	GO:0009853	GO:0010103	GO:0010207	GO:0019344	GO:0019464	GO:0042742	GO:0043085
gi_351624179_gb_JP478480.1	GO:0005576	GO:0005794	GO:0005829	GO:0009505	GO:0009506	GO:0009826	GO:0009828	GO:0016020	GO:0016023	GO:0019953
gi_351624182_gb_JP478483.1	GO:0001578	GO:0005634	GO:0007163	GO:0009825	GO:0010015	GO:0010031	GO:0010091	GO:0055028
gi_351624193_gb_JP478494.1	GO:0004383	GO:0004672	GO:0004674	GO:0005488	GO:0005886	GO:0006182	GO:0006952	GO:0009311	GO:0009617	GO:0009620	GO:0009719	GO:0009751	GO:0009826	GO:0009992	GO:0010038	GO:0016310	GO:0044464	GO:0046777	GO:0048527	GO:0048608
gi_351624200_gb_JP478501.1	GO:0005515	GO:0006364	GO:0009535	GO:0009538	GO:0009657	GO:0009941	GO:0010207	GO:0010287	GO:0015979	GO:0019344	GO:0030003	GO:0030094	GO:0035304	GO:0070838
gi_351624214_gb_JP478515.1	GO:0003677	GO:0004674	GO:0005524	GO:0005634	GO:0005774	GO:0005886	GO:0006073	GO:0006355	GO:0006468	GO:0006694	GO:0006793	GO:0007169	GO:0009505	GO:0009506	GO:0009610	GO:0009664	GO:0009737	GO:0009860	GO:0009888	GO:0010015	GO:0010817	GO:0016021	GO:0016301	GO:0022625	GO:0044036	GO:0045177	GO:0046165	GO:0046658	GO:0048638	GO:0050794	GO:0051239	GO:2000605
gi_351624224_gb_JP478525.1	GO:0000166	GO:0003676	GO:0003723	GO:0044464	GO:0046872
gi_351624275_gb_JP478576.1	GO:0005222	GO:0005242	GO:0005261	GO:0005262	GO:0005516	GO:0005886	GO:0006813	GO:0006816	GO:0006874	GO:0007263	GO:0009626	GO:0009860	GO:0010033	GO:0016021	GO:0016324	GO:0030003	GO:0030551	GO:0051707	GO:0070838
gi_351624285_gb_JP478586.1	GO:0005515	GO:0005794	GO:0005886	GO:0006857	GO:0009414	GO:0009506	GO:0009611	GO:0009624	GO:0009705	GO:0009737	GO:0009751	GO:0009753	GO:0009860	GO:0010119	GO:0010167	GO:0015112	GO:0015334	GO:0015706	GO:0015824	GO:0015996	GO:0016021	GO:0016126	GO:0019761	GO:0030003	GO:0042538	GO:0042742	GO:0042936	GO:0042937	GO:0042938	GO:0042939	GO:0043201	GO:0046907	GO:0052541	GO:0052546	GO:0070838	GO:0080052	GO:0080053	GO:0080168	GO:0090440
gi_351624288_gb_JP478589.1	GO:0000086	GO:0000132	GO:0000226	GO:0000776	GO:0002009	GO:0002119	GO:0003774	GO:0003777	GO:0004857	GO:0005089	GO:0005634	GO:0005737	GO:0005814	GO:0005829	GO:0005868	GO:0005875	GO:0005886	GO:0006260	GO:0006809	GO:0006898	GO:0006914	GO:0007018	GO:0007290	GO:0007291	GO:0007476	GO:0008022	GO:0008039	GO:0008092	GO:0008180	GO:0008407	GO:0009792	GO:0009860	GO:0010171	GO:0010467	GO:0016070	GO:0016459	GO:0019886	GO:0019899	GO:0019904	GO:0030235	GO:0031326	GO:0034454	GO:0035046	GO:0035071	GO:0035085	GO:0040010	GO:0040011	GO:0040020	GO:0040035
gi_351624349_gb_JP478650.1	GO:0005515	GO:0006886	GO:0006950	GO:0007600	GO:0009266	GO:0009605	GO:0015672	GO:0016192	GO:0016482	GO:0030016	GO:0030054	GO:0032412	GO:0042221	GO:0043231	GO:0044304	GO:0044449	GO:0044459	GO:0045202	GO:0048468	GO:0048731	GO:0050801	GO:0051050	GO:0051716	GO:0051924	GO:0055117	GO:0071704	GO:0072659	GO:0086001	GO:0086065	GO:0090150
gi_351624360_gb_JP478661.1	GO:0000096	GO:0002213	GO:0003924	GO:0004620	GO:0004806	GO:0005576	GO:0005634	GO:0005759	GO:0005886	GO:0006139	GO:0006633	GO:0006635	GO:0006796	GO:0008652	GO:0009069	GO:0009072	GO:0009106	GO:0009108	GO:0009640	GO:0009653	GO:0010183	GO:0016043	GO:0016298	GO:0016992	GO:0018130	GO:0019438	GO:0019637	GO:0032922	GO:0044271	GO:0044272	GO:0047714	GO:0048513	GO:0048869	GO:0090404
gi_351624372_gb_JP478673.1	GO:0000271	GO:0003924	GO:0005200	GO:0005525	GO:0005618	GO:0005737	GO:0005773	GO:0005794	GO:0005829	GO:0005874	GO:0005886	GO:0006084	GO:0006094	GO:0006096	GO:0006184	GO:0006833	GO:0006972	GO:0007010	GO:0007017	GO:0007018	GO:0007030	GO:0009409	GO:0009506	GO:0009507	GO:0009651	GO:0009740	GO:0009825	GO:0009932	GO:0010075	GO:0010162	GO:0010498	GO:0016126	GO:0016132	GO:0019344	GO:0043481	GO:0045298	GO:0046686	GO:0048767	GO:0051258	GO:0071555
gi_351624376_gb_JP478677.1	GO:0016020	GO:0016709	GO:0018675	GO:0043231	GO:0046872	GO:0055114
gi_351624379_gb_JP478680.1	GO:0004674	GO:0005524	GO:0005886	GO:0005976	GO:0006259	GO:0006468	GO:0007126	GO:0007169	GO:0009653	GO:0009718	GO:0009744	GO:0010224	GO:0031347	GO:0032440	GO:0034645	GO:0045087	GO:0048437	GO:0048438	GO:0048507	GO:0048589	GO:0048827	GO:0048869	GO:0050776	GO:0050793	GO:0051276	GO:0051707	GO:0055114	GO:0071554
gi_351624390_gb_JP478691.1	GO:0005198	GO:0005515	GO:0005576	GO:0005634	GO:0006944	GO:0007399	GO:0009556	GO:0009941	GO:0030154	GO:0044267	GO:0048609	GO:0050794	GO:0050896	GO:0051704	GO:0052543
gi_351624448_gb_JP478749.1	GO:0000256	GO:0004038	GO:0005737	GO:0005783	GO:0006995	GO:0008270	GO:0009442	GO:0010136	GO:0050897
gi_351624450_gb_JP478751.1	GO:0000271	GO:0004506	GO:0005576	GO:0005783	GO:0006725	GO:0008203	GO:0008204	GO:0009414	GO:0009611	GO:0009744	GO:0009753	GO:0009813	GO:0010224	GO:0010264	GO:0016021	GO:0016126	GO:0016132	GO:0019745	GO:0031090	GO:0042594	GO:0044182	GO:0050660	GO:0051716	GO:0055114
gi_351624464_gb_JP478765.1	GO:0000003	GO:0003824	GO:0005515	GO:0005856	GO:0006928	GO:0006996	GO:0007368	GO:0016020	GO:0022607	GO:0042995	GO:0043167	GO:0043231	GO:0044444	GO:0044446	GO:0048731	GO:0050794	GO:0051179
gi_351624504_gb_JP478805.1	GO:0005737	GO:0016746
gi_351624507_gb_JP478808.1	GO:0004124	GO:0005507	GO:0005634	GO:0005739	GO:0005777	GO:0005886	GO:0006096	GO:0006535	GO:0006833	GO:0006972	GO:0007030	GO:0009266	GO:0009507	GO:0009509	GO:0009570	GO:0009651	GO:0009684	GO:0009750	GO:0009836	GO:0010043	GO:0016740	GO:0019288	GO:0019500	GO:0019761	GO:0030170	GO:0032880	GO:0042744	GO:0046686	GO:0047458	GO:0048046	GO:0050017	GO:0050234	GO:0050461	GO:0051410	GO:0080147
gi_351624526_gb_JP478827.1	GO:0005739	GO:0005829	GO:0006629	GO:0008756	GO:0009506	GO:0009570	GO:0010030	GO:0010167	GO:0010214	GO:0015706	GO:0016208	GO:0033611	GO:0046482	GO:0046686	GO:0048046	GO:0050203	GO:0050832	GO:0071944
gi_351624533_gb_JP478834.1	GO:0005507	GO:0005775	GO:0009507	GO:0009579	GO:0016491	GO:0033793	GO:0046148
gi_351624545_gb_JP478846.1	GO:0000122	GO:0001658	GO:0001843	GO:0003007	GO:0004888	GO:0005113	GO:0005119	GO:0005783	GO:0005794	GO:0005886	GO:0005901	GO:0006914	GO:0007346	GO:0007420	GO:0008158	GO:0008201	GO:0008544	GO:0009506	GO:0009725	GO:0009954	GO:0010002	GO:0010157	GO:0010557	GO:0010875	GO:0012505	GO:0015485	GO:0016021	GO:0016485	GO:0019217	GO:0021522	GO:0021997	GO:0030301	GO:0030326	GO:0030332	GO:0030496	GO:0031090	GO:0031290	GO:0031325	GO:0032403	GO:0032880	GO:0033554	GO:0035137	GO:0040015	GO:0042593	GO:0043010	GO:0043433	GO:0043616	GO:0044446	GO:0044463
gi_351624575_gb_JP478876.1	GO:0006725	GO:0006970	GO:0009408	GO:0009414	GO:0009535	GO:0009540	GO:0009688	GO:0009737	GO:0009941	GO:0010114	GO:0010182	GO:0010264	GO:0016020	GO:0016123	GO:0022900	GO:0031969	GO:0050891	GO:0052662	GO:0052663
gi_351624577_gb_JP478878.1	GO:0000086	GO:0005524	GO:0005618	GO:0005730	GO:0005739	GO:0005774	GO:0005794	GO:0005829	GO:0005886	GO:0006200	GO:0006457	GO:0006986	GO:0007411	GO:0009408	GO:0009414	GO:0009506	GO:0009570	GO:0009612	GO:0009644	GO:0009651	GO:0009816	GO:0009908	GO:0010187	GO:0010286	GO:0016887	GO:0019722	GO:0030235	GO:0030911	GO:0038096	GO:0042026	GO:0042470	GO:0042542	GO:0042803	GO:0045040	GO:0045429	GO:0046685	GO:0048046	GO:0048366	GO:0050821	GO:0050999	GO:0051082	GO:0051131	GO:0071277	GO:0071682	GO:0090332
gi_351624588_gb_JP478889.1	GO:0000271	GO:0005515	GO:0005737	GO:0005739	GO:0005783	GO:0008356	GO:0008361	GO:0009165	GO:0009505	GO:0009506	GO:0009507	GO:0009555	GO:0009624	GO:0009630	GO:0009637	GO:0009640	GO:0009672	GO:0009825	GO:0009855	GO:0009908	GO:0009921	GO:0009925	GO:0009926	GO:0009932	GO:0009944	GO:0009958	GO:0009986	GO:0010014	GO:0010051	GO:0010082	GO:0010089	GO:0010218	GO:0010229	GO:0010252	GO:0010315	GO:0010338	GO:0010358	GO:0012506	GO:0016021	GO:0016023	GO:0016328	GO:0043481	GO:0044036	GO:0045177	GO:0048364	GO:0048439	GO:0048443	GO:0048519	GO:0048766
gi_351624658_gb_JP478959.1	GO:0006807	GO:0009813	GO:0016410	GO:0016413	GO:0016740	GO:0044238	GO:0044249	GO:0050896
gi_351624708_gb_JP479009.1	GO:0004349	GO:0004350	GO:0005524	GO:0005743	GO:0005829	GO:0006536	GO:0006561	GO:0006592	GO:0006898	GO:0006979	GO:0009269	GO:0009506	GO:0009507	GO:0009555	GO:0009737	GO:0009793	GO:0016020	GO:0016310	GO:0017084	GO:0019240	GO:0034641	GO:0040010	GO:0042538	GO:0048364	GO:0055114	GO:0055129
gi_351624722_gb_JP479023.1	GO:0010228	GO:0016020	GO:0016023
gi_351624733_gb_JP479034.1	GO:0008152
gi_351624741_gb_JP479042.1	GO:0005739	GO:0005975	GO:0009507	GO:0016772	GO:0016773	GO:0019200	GO:0046835	GO:0070050
gi_351624761_gb_JP479062.1	GO:0004497	GO:0005506	GO:0005783	GO:0006694	GO:0006950	GO:0009055	GO:0009411	GO:0009639	GO:0009686	GO:0009687	GO:0009826	GO:0009908	GO:0010817	GO:0016705	GO:0019825	GO:0020037	GO:0030154	GO:0044425	GO:0045229	GO:0046872	GO:0048513	GO:0048646	GO:0051777	GO:0055114
gi_351624819_gb_JP479120.1	GO:0005488	GO:0005515	GO:0005783	GO:0010345	GO:0016491	GO:0018685	GO:0042761
gi_351624828_gb_JP479129.1	GO:0005488	GO:0006952
gi_351624850_gb_JP479151.1	GO:0005576	GO:0008152	GO:0016614
gi_351624851_gb_JP479152.1	GO:0000271	GO:0003700	GO:0004674	GO:0005524	GO:0005634	GO:0005829	GO:0005886	GO:0005983	GO:0006468	GO:0007020	GO:0007169	GO:0009414	GO:0009507	GO:0009825	GO:0009932	GO:0009934	GO:0010075	GO:0010480	GO:0010817	GO:0016161	GO:0033612	GO:0043169	GO:0043481	GO:0043621	GO:0048229	GO:0048767	GO:0048831	GO:0071555	GO:0080027
gi_351624855_gb_JP479156.1	GO:0005737	GO:0009701	GO:0009812	GO:0009821	GO:0016206	GO:0030746	GO:0030761	GO:0030766	GO:0032259	GO:0033799	GO:0033800	GO:0042803	GO:0046983
gi_351624862_gb_JP479163.1	GO:0000186	GO:0004709	GO:0005524	GO:0005886	GO:0006725	GO:0006812	GO:0006820	GO:0007154	GO:0010413	GO:0016301	GO:0019222	GO:0045087	GO:0045492	GO:0048519	GO:0048583	GO:0048731	GO:0050794	GO:0051707	GO:0071407	GO:0071702	GO:0071705
gi_351624938_gb_JP479239.1	GO:0005886	GO:0006855	GO:0009611	GO:0009725	GO:0015238	GO:0015297	GO:0015299	GO:0015691	GO:0015893	GO:0042991	GO:0043226	GO:0051238	GO:0055085
gi_351624947_gb_JP479248.1	GO:0000166	GO:0004672	GO:0004675	GO:0005515	GO:0005886	GO:0006952	GO:0007165	GO:0008544	GO:0009058	GO:0009725	GO:0009886	GO:0016020	GO:0016049	GO:0016310	GO:0030154	GO:0032989	GO:0044238	GO:0044260	GO:0048610	GO:0048646	GO:0048653	GO:0051707	GO:0060560	GO:0065008	GO:0097159	GO:2000026
gi_351624981_gb_JP479282.1	GO:0005507	GO:0005576	GO:0008447	GO:0009414	GO:0009809	GO:0009832	GO:0010413	GO:0016023	GO:0016491	GO:0045492	GO:0046274	GO:0046688	GO:0048046	GO:0052716	GO:0055114
gi_351625023_gb_JP479324.1	GO:0004185	GO:0005576	GO:0005615	GO:0005618	GO:0005773	GO:0006508	GO:0009505	GO:0009506	GO:0009742
gi_351625035_gb_JP479336.1	GO:0004091	GO:0005488	GO:0005829	GO:0006952	GO:0009628	GO:0009740	GO:0009791	GO:0014070	GO:0016043	GO:0016126	GO:0042546	GO:0048583	GO:0048608	GO:0048765	GO:0051704	GO:0052689
gi_351625041_gb_JP479342.1	GO:0004888	GO:0005488	GO:0005737	GO:0006464	GO:0006952	GO:0007389	GO:0009617	GO:0009755	GO:0009886	GO:0016020	GO:0016043	GO:0016301	GO:0044249	GO:0048437	GO:0048507	GO:0048827
gi_351625066_gb_JP479367.1	GO:0004565	GO:0005576	GO:0005774	GO:0005829	GO:0005975	GO:0006084	GO:0006598	GO:0009505	GO:0009506	GO:0009536	GO:0009664	GO:0009698	GO:0009832	GO:0010075	GO:0016023	GO:0016126	GO:0016132	GO:0030246	GO:0032880	GO:0042398	GO:0042744	GO:0043169	GO:0048046	GO:0048767
gi_351625078_gb_JP479379.1	GO:0000038	GO:0005488	GO:0005783	GO:0009653	GO:0009717	GO:0009809	GO:0009958	GO:0010224	GO:0016020	GO:0016491	GO:0021700	GO:0033770	GO:0043069	GO:0046424	GO:0046872	GO:0048364	GO:0048869	GO:0051554	GO:0080003	GO:0080004	GO:0080132
gi_351625093_gb_JP479394.1	GO:0005506	GO:0005515	GO:0005783	GO:0008284	GO:0009055	GO:0009411	GO:0009507	GO:0009699	GO:0009733	GO:0009813	GO:0010075	GO:0010229	GO:0010338	GO:0016020	GO:0016711	GO:0019825	GO:0020037	GO:0040009	GO:0046622	GO:0048316	GO:0048445	GO:0048504	GO:0051781	GO:0055114
gi_351625146_gb_JP479447.1	GO:0016104	GO:0016866	GO:0019745	GO:0042299	GO:0042300	GO:0042335	GO:0042561	GO:0090438
gi_351625169_gb_JP479470.1	GO:0016757
gi_351625210_gb_JP479511.1	GO:0003002	GO:0005769	GO:0005794	GO:0005802	GO:0005886	GO:0005975	GO:0006096	GO:0006833	GO:0007030	GO:0008810	GO:0009266	GO:0009504	GO:0009624	GO:0009734	GO:0009735	GO:0009750	GO:0009825	GO:0009832	GO:0009932	GO:0010193	GO:0010817	GO:0016021	GO:0019344	GO:0030244	GO:0030245	GO:0032880	GO:0042538	GO:0042744	GO:0043481	GO:0043622	GO:0046686	GO:0048193	GO:0048437	GO:0048507	GO:0048767	GO:0071555
gi_351625213_gb_JP479514.1	GO:0004857	GO:0005576	GO:0005618	GO:0009505	GO:0015824	GO:0016023	GO:0019222	GO:0030599	GO:0033554	GO:0042545	GO:0043086	GO:0045330	GO:0045490
gi_351625221_gb_JP479522.1	GO:0005254	GO:0005507	GO:0005635	GO:0005739	GO:0005773	GO:0005777	GO:0005829	GO:0005856	GO:0005886	GO:0009407	GO:0009570	GO:0009610	GO:0009753	GO:0009941	GO:0010027	GO:0010043	GO:0010193	GO:0010583	GO:0010731	GO:0010880	GO:0016740	GO:0030154	GO:0034765	GO:0043295	GO:0043903	GO:0045174	GO:0048046	GO:0048731	GO:0050780	GO:0051716	GO:0060429	GO:0065009
gi_351625252_gb_JP479553.1	GO:0005576	GO:0006066	GO:0006950	GO:0007267	GO:0008812	GO:0009553	GO:0010430	GO:0016614	GO:0043231	GO:0044271	GO:0044444	GO:0046593	GO:0050660
gi_351625273_gb_JP479574.1	GO:0009715	GO:0009813	GO:0016210	GO:0034081
gi_351625316_gb_JP479617.1	GO:0006952	GO:0008757	GO:0009611	GO:0016740	GO:0051707	GO:0052624	GO:0072330	GO:0080150
gi_351625347_gb_JP479648.1	GO:0005524	GO:0005739	GO:0005774	GO:0005829	GO:0005886	GO:0006200	GO:0006612	GO:0006855	GO:0006995	GO:0009414	GO:0009506	GO:0009595	GO:0009697	GO:0009723	GO:0009738	GO:0009744	GO:0009749	GO:0009750	GO:0009817	GO:0009862	GO:0009867	GO:0009941	GO:0009963	GO:0010193	GO:0010200	GO:0010310	GO:0010363	GO:0015086	GO:0015416	GO:0015691	GO:0015692	GO:0016020	GO:0016021	GO:0016126	GO:0016132	GO:0019745	GO:0030003	GO:0031348	GO:0042299	GO:0042335	GO:0042344	GO:0042538	GO:0042626	GO:0042742	GO:0043069	GO:0043407	GO:0043900	GO:0052541	GO:0052544
gi_351625354_gb_JP479655.1	GO:0004553	GO:0005986	GO:0006979	GO:0008152	GO:0009414	GO:0009507	GO:0009737	GO:0010325	GO:0019593	GO:0047268	GO:0047274	GO:0097159
gi_351625374_gb_JP479675.1	GO:0002215	GO:0004601	GO:0005576	GO:0005618	GO:0005774	GO:0005794	GO:0005829	GO:0006979	GO:0009651	GO:0009809	GO:0009855	GO:0009908	GO:0009944	GO:0010014	GO:0010075	GO:0020037	GO:0045926	GO:0046872	GO:0055114
gi_351625417_gb_JP479718.1	GO:0000186	GO:0002679	GO:0004672	GO:0004709	GO:0004714	GO:0005524	GO:0005576	GO:0005886	GO:0006612	GO:0006826	GO:0006944	GO:0006979	GO:0009506	GO:0009611	GO:0009693	GO:0009863	GO:0010106	GO:0010167	GO:0010200	GO:0010363	GO:0010413	GO:0015706	GO:0030246	GO:0031625	GO:0042742	GO:0043069	GO:0045492	GO:0046777	GO:0048544	GO:0050832
gi_351625516_gb_JP479817.1	GO:0000271	GO:0005507	GO:0005774	GO:0005829	GO:0008447	GO:0009165	GO:0009505	GO:0009506	GO:0009825	GO:0009932	GO:0010817	GO:0016491	GO:0030243	GO:0043481	GO:0046658	GO:0048046	GO:0048767	GO:0055114	GO:0071555
gi_351625526_gb_JP479827.1	GO:0003824	GO:0008299	GO:0009570	GO:0009657	GO:0009941	GO:0044238	GO:0044260	GO:0044424	GO:0046686
gi_351625546_gb_JP479847.1	GO:0097159
gi_351625553_gb_JP479854.1	GO:0005515	GO:0005794	GO:0005886	GO:0006857	GO:0006891	GO:0009414	GO:0009506	GO:0009611	GO:0009624	GO:0009705	GO:0009737	GO:0009751	GO:0009753	GO:0009860	GO:0010119	GO:0010167	GO:0010351	GO:0015112	GO:0015334	GO:0015706	GO:0015824	GO:0015996	GO:0016021	GO:0016126	GO:0016558	GO:0019761	GO:0030003	GO:0042538	GO:0042742	GO:0042936	GO:0042937	GO:0042938	GO:0042939	GO:0043201	GO:0052541	GO:0052546	GO:0070838	GO:0080052	GO:0080053	GO:0080168	GO:0090440
gi_351625592_gb_JP479893.1	GO:0000023	GO:0001053	GO:0001108	GO:0003677	GO:0003700	GO:0003899	GO:0005618	GO:0005886	GO:0006098	GO:0006352	GO:0006355	GO:0008299	GO:0009405	GO:0009415	GO:0009507	GO:0009657	GO:0016556	GO:0019252	GO:0040007	GO:0045893	GO:0052572	GO:0071482	GO:0071483	GO:0090351
gi_351625616_gb_JP479917.1	GO:0005506	GO:0005737	GO:0009416	GO:0009685	GO:0009725	GO:0009813	GO:0016702	GO:0016706	GO:0016707	GO:0048856	GO:0055114
gi_351625621_gb_JP479922.1	GO:0005634	GO:0005783	GO:0005856	GO:0005886	GO:0006612	GO:0006874	GO:0008092	GO:0009651	GO:0009827	GO:0009860	GO:0010468	GO:0010646	GO:0015672	GO:0016482	GO:0019899	GO:0030016	GO:0030054	GO:0030674	GO:0032386	GO:0032412	GO:0033365	GO:0034613	GO:0035556	GO:0044093	GO:0044237	GO:0044304	GO:0044449	GO:0044459	GO:0045202	GO:0048193	GO:0048519	GO:0048522	GO:0048583	GO:0048667	GO:0048812	GO:0051050	GO:0051924	GO:0071363	GO:0086001	GO:0086004	GO:0086019	GO:0086070	GO:0090002	GO:2000021
gi_351625637_gb_JP479938.1	GO:0004871	GO:0005886	GO:0009637	GO:0010155	GO:0046777	GO:0048731
gi_351625674_gb_JP479975.1	GO:0004439	GO:0004445	GO:0005515	GO:0005769	GO:0005794	GO:0005829	GO:0005929	GO:0006661	GO:0006996	GO:0007169	GO:0007399	GO:0009653	GO:0009968	GO:0010468	GO:0010605	GO:0015630	GO:0016023	GO:0016311	GO:0016491	GO:0030031	GO:0030258	GO:0031324	GO:0032319	GO:0032868	GO:0043167	GO:0043647	GO:0044260	GO:0044425	GO:0044446	GO:0046488	GO:0046856	GO:0048488	GO:0048513	GO:0048869	GO:0051246	GO:0052658
gi_351625678_gb_JP479979.1	GO:0000165	GO:0000166	GO:0003676	GO:0003723	GO:0003968	GO:0005634	GO:0005730	GO:0006342	GO:0006355	GO:0006612	GO:0007267	GO:0009615	GO:0009617	GO:0009862	GO:0009867	GO:0010025	GO:0010073	GO:0010310	GO:0010363	GO:0010495	GO:0016569	GO:0030422	GO:0031348	GO:0035304	GO:0048467	GO:0048827	GO:0050832	GO:0051607	GO:0060148
gi_351625691_gb_JP479992.1	GO:0000394	GO:0005737	GO:0006260	GO:0006306	GO:0006974	GO:0008283	GO:0008898	GO:0009086	GO:0009616	GO:0010050	GO:0010269	GO:0016205	GO:0033528	GO:0043687	GO:0045893	GO:0046872	GO:0051567
gi_351625698_gb_JP479999.1	GO:0009543
gi_351625714_gb_JP480015.1	GO:0008152	GO:0009056	GO:0009505	GO:0015824	GO:0016043	GO:0016788	GO:0019222	GO:0033554	GO:0044238	GO:0071704	GO:0071944
gi_351625727_gb_JP480028.1	GO:0000165	GO:0002237	GO:0002679	GO:0005634	GO:0006355	GO:0006612	GO:0006944	GO:0009409	GO:0009416	GO:0009507	GO:0009697	GO:0009734	GO:0009738	GO:0009741	GO:0009816	GO:0009826	GO:0009862	GO:0009867	GO:0009941	GO:0010112	GO:0010200	GO:0010252	GO:0010279	GO:0010310	GO:0010583	GO:0016045	GO:0016046	GO:0016132	GO:0018874	GO:0030968	GO:0031348	GO:0034052	GO:0035304	GO:0043069	GO:0044419	GO:0050832	GO:0052625	GO:0052626	GO:0052627	GO:0052628	GO:0071456	GO:1901183
gi_351625728_gb_JP480029.1	GO:0000974	GO:0002020	GO:0004872	GO:0005046	GO:0005102	GO:0005524	GO:0005618	GO:0005681	GO:0005730	GO:0005739	GO:0005774	GO:0005783	GO:0005794	GO:0005801	GO:0005829	GO:0005886	GO:0006007	GO:0006200	GO:0006397	GO:0006457	GO:0006621	GO:0006892	GO:0006914	GO:0006986	GO:0007269	GO:0007411	GO:0008021	GO:0008380	GO:0009414	GO:0009506	GO:0009507	GO:0009615	GO:0009617	GO:0009644	GO:0009986	GO:0010286	GO:0015031	GO:0016021	GO:0016044	GO:0016363	GO:0016567	GO:0019048	GO:0022626	GO:0031625	GO:0031969	GO:0032440	GO:0034976	GO:0042470	GO:0042538
gi_351625732_gb_JP480033.1	GO:0005768	GO:0005794	GO:0005802
gi_351625747_gb_JP480048.1	GO:0000166	GO:0016787
gi_351625809_gb_JP480110.1	GO:0004497	GO:0016020	GO:0016705	GO:0018675	GO:0043231	GO:0046872	GO:0055114
gi_351625838_gb_JP480139.1	GO:0006952	GO:0009607	GO:0010033	GO:0016787	GO:0044237	GO:0044464	GO:0050794	GO:0051704	GO:0051716	GO:0071704
gi_351627284_gb_JP480167.1	GO:0004497	GO:0005488	GO:0016020	GO:0016491	GO:0016705	GO:0043231	GO:0046872
gi_351627296_gb_JP480179.1	GO:0005739	GO:0005794	GO:0009522	GO:0009523	GO:0009535	GO:0009765	GO:0010287	GO:0016021	GO:0016168	GO:0018298	GO:0030076	GO:0046872
gi_351627314_gb_JP480197.1	GO:0004364	GO:0005829	GO:0005886	GO:0006725	GO:0006749	GO:0006865	GO:0006979	GO:0007154	GO:0009506	GO:0009507	GO:0009651	GO:0009704	GO:0009751	GO:0016829	GO:0032787	GO:0043295	GO:0044255	GO:0044257	GO:0046686	GO:0048527	GO:0051716	GO:0055114	GO:0060416	GO:0080148	GO:0080167
gi_351627347_gb_JP480230.1	GO:0007399	GO:0008092	GO:0008152	GO:0016020	GO:0016459	GO:0016477	GO:0022607	GO:0030030	GO:0030036	GO:0031410	GO:0032989	GO:0042995	GO:0043168	GO:0043231	GO:0050794	GO:0051128	GO:0055013
gi_351627348_gb_JP480231.1	GO:0005634	GO:0016126	GO:0019745	GO:0042299	GO:0042300	GO:0042335	GO:0042561	GO:0090438
gi_351627356_gb_JP480239.1	GO:0003885	GO:0005739	GO:0008152	GO:0008762	GO:0016020	GO:0016614	GO:0019853	GO:0043231	GO:0044444	GO:0050105	GO:0050660	GO:0055114
gi_351627413_gb_JP480296.1	GO:0005737	GO:0005886	GO:0006612	GO:0006857	GO:0006862	GO:0006888	GO:0006944	GO:0010363	GO:0015198	GO:0015696	GO:0015802	GO:0043069	GO:0043090	GO:0043269	GO:0048235	GO:0055085	GO:0080167
gi_351627420_gb_JP480303.1	GO:0005739	GO:0005777	GO:0005829	GO:0006952	GO:0007165	GO:0009611	GO:0009695	GO:0009725	GO:0009751	GO:0010181	GO:0016491	GO:0016629	GO:0031407	GO:0031408	GO:0046686	GO:0055114
gi_351627478_gb_JP480361.1	GO:0004349	GO:0004350	GO:0005524	GO:0005737	GO:0005739	GO:0005829	GO:0006536	GO:0006561	GO:0006592	GO:0006898	GO:0006979	GO:0009269	GO:0009506	GO:0009507	GO:0009555	GO:0009737	GO:0009793	GO:0016020	GO:0016310	GO:0017084	GO:0019240	GO:0040010	GO:0042538	GO:0048364	GO:0055114	GO:0055129
gi_351627482_gb_JP480365.1	GO:0005507	GO:0005634	GO:0005773	GO:0005829	GO:0006790	GO:0006996	GO:0007155	GO:0009409	GO:0009506	GO:0009507	GO:0009611	GO:0009651	GO:0009733	GO:0009753	GO:0009908	GO:0016020	GO:0019748	GO:0019752	GO:0019862	GO:0030001	GO:0030163	GO:0030234	GO:0030246	GO:0043234	GO:0044248	GO:0044249	GO:0044267	GO:0048513	GO:0050794	GO:0051336	GO:0051716
gi_351627486_gb_JP480369.1	GO:0005774	GO:0005886	GO:0006007	GO:0006813	GO:0009555	GO:0009674	GO:0016020	GO:0019344	GO:0071805
gi_351627523_gb_JP480406.1	GO:0005576
gi_351627529_gb_JP480412.1	GO:0004097	GO:0005507	GO:0005775	GO:0009507	GO:0009579	GO:0033793	GO:0046148	GO:0046872	GO:0055114
gi_351627536_gb_JP480419.1	GO:0005488	GO:0016020	GO:0016491	GO:0043231	GO:0044444	GO:0046872
gi_351627543_gb_JP480426.1	GO:0000165	GO:0004683	GO:0004698	GO:0005509	GO:0005515	GO:0005524	GO:0005634	GO:0005777	GO:0005789	GO:0005829	GO:0005886	GO:0006468	GO:0006499	GO:0006612	GO:0006862	GO:0006888	GO:0006944	GO:0009409	GO:0009414	GO:0009506	GO:0009611	GO:0009612	GO:0009697	GO:0009723	GO:0009733	GO:0009738	GO:0009862	GO:0009867	GO:0009963	GO:0010119	GO:0010200	GO:0010359	GO:0010363	GO:0015696	GO:0015802	GO:0019722	GO:0030968	GO:0031348	GO:0042538	GO:0043069	GO:0043090	GO:0046777	GO:0050832	GO:0080092
gi_351627550_gb_JP480433.1	GO:0001568	GO:0003824	GO:0005488	GO:0005634	GO:0007219	GO:0007389	GO:0007420	GO:0007423	GO:0009966	GO:0016020	GO:0021515	GO:0021517	GO:0021953	GO:0030100	GO:0030855	GO:0043009	GO:0044216	GO:0044238	GO:0044260	GO:0044444	GO:0044446	GO:0048518	GO:0048598	GO:0048646	GO:0048665	GO:0050767
gi_351627602_gb_JP480485.1	GO:0009416	GO:0009685	GO:0009725	GO:0009791	GO:0016491	GO:0045543	GO:0048608
gi_351627627_gb_JP480510.1	GO:0005739	GO:0006457	GO:0006508	GO:0008233	GO:0009408	GO:0009536	GO:0009644	GO:0016020	GO:0042542
gi_351627700_gb_JP480583.1	GO:0000166	GO:0005515	GO:0005737	GO:0005886	GO:0006725	GO:0007165	GO:0007186	GO:0007275	GO:0009628	GO:0009737	GO:0009738	GO:0009743	GO:0009746	GO:0016044	GO:0019001	GO:0031347	GO:0033036	GO:0033554	GO:0043067	GO:0044238	GO:0044249	GO:0044281	GO:0044425	GO:0045087	GO:0046907	GO:0048364	GO:0048519	GO:0048856	GO:0065008	GO:0071310
gi_351627743_gb_JP480626.1	GO:0004565	GO:0005576	GO:0005774	GO:0005829	GO:0005975	GO:0006084	GO:0006598	GO:0009505	GO:0009506	GO:0009536	GO:0009664	GO:0009698	GO:0009832	GO:0010075	GO:0016023	GO:0016126	GO:0016132	GO:0030246	GO:0032880	GO:0042398	GO:0042744	GO:0043169	GO:0048046	GO:0048767
gi_351627805_gb_JP480688.1	GO:0005886
gi_351627821_gb_JP480704.1	GO:0005634	GO:0005768	GO:0005774	GO:0005794	GO:0005802	GO:0008168	GO:0008757	GO:0009269	GO:0009409	GO:0009505	GO:0009506	GO:0009651	GO:0009737	GO:0010054	GO:0010584	GO:0016021	GO:0016049	GO:0019288	GO:0032259	GO:0042546	GO:0052546	GO:0060560
gi_351627864_gb_JP480747.1	GO:0016410	GO:0016413	GO:0016740	GO:0034641	GO:0044249
gi_351627868_gb_JP480751.1	GO:0000271	GO:0004553	GO:0005576	GO:0005618	GO:0005794	GO:0006073	GO:0007389	GO:0008361	GO:0009408	GO:0009409	GO:0009505	GO:0009506	GO:0009507	GO:0009611	GO:0009612	GO:0009645	GO:0009664	GO:0009733	GO:0009741	GO:0009825	GO:0009926	GO:0009932	GO:0010075	GO:0010200	GO:0010411	GO:0016020	GO:0016126	GO:0016762	GO:0033946	GO:0043481	GO:0048046	GO:0048767	GO:0080039
gi_351627884_gb_JP480767.1	GO:0000139	GO:0005576	GO:0005618	GO:0005789	GO:0009506	GO:0010033	GO:0016324	GO:0017040	GO:0031629	GO:0035187	GO:0042759	GO:0045494	GO:0046512	GO:0046514
gi_351627981_gb_JP480864.1	GO:0005488	GO:0006952	GO:0007165	GO:0009725	GO:0009743
gi_351627984_gb_JP480867.1	GO:0004420	GO:0005634	GO:0005789	GO:0015936	GO:0016021	GO:0016104	GO:0016126	GO:0031966	GO:0042170	GO:0042282	GO:0050661	GO:0055114
gi_351627993_gb_JP480876.1	GO:0005576	GO:0005739	GO:0005794	GO:0005829	GO:0005886	GO:0005975	GO:0008810	GO:0009505	GO:0009506	GO:0009507	GO:0009624	GO:0009664	GO:0009855	GO:0009944	GO:0010014	GO:0010051	GO:0010089	GO:0010093	GO:0016023	GO:0030245	GO:0042547	GO:0044036	GO:0048440
gi_351628000_gb_JP480883.1	GO:0005488	GO:0005506	GO:0009055	GO:0009411	GO:0009733	GO:0009813	GO:0016020	GO:0016702	GO:0016711	GO:0020037	GO:0033772	GO:0043227	GO:0055114
gi_351628014_gb_JP480897.1	GO:0005515	GO:0009536	GO:0010304	GO:0015996
gi_351628018_gb_JP480901.1	GO:0005576	GO:0005618	GO:0006857	GO:0009651	GO:0016023	GO:0030145	GO:0031012	GO:0042350	GO:0045735	GO:0046872	GO:0050162	GO:0055114
gi_351628031_gb_JP480914.1	GO:0004674	GO:0005488	GO:0005524	GO:0005886	GO:0006468	GO:0007165	GO:0007169	GO:0007389	GO:0009886	GO:0009888	GO:0010075	GO:0016021	GO:0016043	GO:0032440	GO:0040007	GO:0044260	GO:0044424	GO:0048443	GO:0048869	GO:0051707	GO:0055114	GO:0071407	GO:0090304
gi_351628057_gb_JP480940.1	GO:0005509	GO:0005544	GO:0005635	GO:0005654	GO:0005789	GO:0005819	GO:0005829	GO:0005886	GO:0006694	GO:0006909	GO:0007109	GO:0009408	GO:0009409	GO:0009414	GO:0009579	GO:0009639	GO:0009651	GO:0009827	GO:0009860	GO:0030048	GO:0030496	GO:0035176	GO:0042581	GO:0042582	GO:0042584	GO:0044548	GO:0045335	GO:0046165	GO:0048046	GO:0048306	GO:0050794	GO:0051592	GO:0065008
gi_351628077_gb_JP480960.1	GO:0004872	GO:0005315	GO:0005436	GO:0005887	GO:0006817	GO:0006944	GO:0009556	GO:0009673	GO:0009941	GO:0016020	GO:0016117	GO:0052543	GO:0055085
gi_351628177_gb_JP481060.1	GO:0000166	GO:0004755	GO:0005739	GO:0005829	GO:0009744	GO:0009750	GO:0010228	GO:0016926	GO:0019477	GO:0047130	GO:0047131	GO:0050665	GO:0055114	GO:0080167
gi_351628195_gb_JP481078.1	GO:0000003	GO:0000049	GO:0002119	GO:0004825	GO:0005524	GO:0005730	GO:0005737	GO:0005739	GO:0005829	GO:0006431	GO:0008340	GO:0009055	GO:0009303	GO:0009792	GO:0022900	GO:0040010	GO:0046686
gi_351628198_gb_JP481081.1	GO:0002237	GO:0004672	GO:0004714	GO:0005515	GO:0005524	GO:0006468	GO:0007165	GO:0009595	GO:0009620	GO:0009653	GO:0009814	GO:0009913	GO:0010200	GO:0012501	GO:0016020	GO:0016043	GO:0016310	GO:0016998	GO:0031347	GO:0033554	GO:0043231	GO:0044267	GO:0044444	GO:0048367	GO:0048468	GO:0048507	GO:0050776	GO:0071310	GO:0071495	GO:0071554	GO:0071702	GO:0097367
gi_351628205_gb_JP481088.1	GO:0005794	GO:0009536	GO:0009832	GO:0016020	GO:0016740	GO:0016759	GO:0033692	GO:0044036	GO:0071555	GO:0071944
gi_351628222_gb_JP481105.1	GO:0000272	GO:0004553	GO:0005576	GO:0005975	GO:0008810	GO:0009507	GO:0009664	GO:0010054	GO:0016023	GO:0030246	GO:0042547
gi_351628246_gb_JP481129.1	GO:0000041	GO:0005634	GO:0005774	GO:0005886	GO:0006820	GO:0008381	GO:0009506	GO:0009744	GO:0009749	GO:0009750	GO:0050982	GO:0055085	GO:0080167
gi_351628263_gb_JP481146.1	GO:0005770	GO:0005783	GO:0006623	GO:0006813	GO:0006885	GO:0009407	GO:0009507	GO:0009827	GO:0009860	GO:0010260	GO:0010583	GO:0012505	GO:0015385	GO:0030007	GO:0030104	GO:0035725
gi_351628305_gb_JP481188.1	GO:0005351	GO:0005634	GO:0005774	GO:0005794	GO:0005886	GO:0009414	GO:0009507	GO:0009651	GO:0009694	GO:0009705	GO:0009737	GO:0009753	GO:0010030	GO:0015145	GO:0015749	GO:0016021	GO:0032440	GO:0034219	GO:0042593	GO:0055114
gi_351628320_gb_JP481203.1	GO:0009534	GO:0009941
gi_351628326_gb_JP481209.1	GO:0005524	GO:0005634	GO:0005730	GO:0005829	GO:0005886	GO:0006397	GO:0006468	GO:0008353	GO:0008380	GO:0009616	GO:0009957	GO:0010050	GO:0010228	GO:0010267	GO:0016607	GO:0019908	GO:0030097	GO:0030332	GO:0035196	GO:0043405	GO:0046777	GO:0048366	GO:0070816
gi_351628346_gb_JP481229.1	GO:0000166	GO:0003676	GO:0003960	GO:0005773	GO:0005794	GO:0005829	GO:0005886	GO:0008152	GO:0008270	GO:0009528	GO:0009535	GO:0009941	GO:0016491	GO:0050662	GO:0055114
gi_351628361_gb_JP481244.1	GO:0004497	GO:0005506	GO:0005576	GO:0005783	GO:0009055	GO:0009718	GO:0009733	GO:0009744	GO:0010224	GO:0016036	GO:0016099	GO:0016705	GO:0016711	GO:0019375	GO:0019825	GO:0020037	GO:0031090	GO:0042631	GO:0044425	GO:0046872	GO:0055114
gi_351628403_gb_JP481286.1	GO:0000271	GO:0000323	GO:0005515	GO:0005737	GO:0005739	GO:0005783	GO:0008356	GO:0008361	GO:0009165	GO:0009505	GO:0009506	GO:0009507	GO:0009555	GO:0009624	GO:0009630	GO:0009637	GO:0009640	GO:0009672	GO:0009723	GO:0009825	GO:0009855	GO:0009908	GO:0009921	GO:0009925	GO:0009926	GO:0009932	GO:0009944	GO:0009958	GO:0009986	GO:0010014	GO:0010051	GO:0010082	GO:0010089	GO:0010218	GO:0010229	GO:0010252	GO:0010315	GO:0010329	GO:0010338	GO:0010358	GO:0012506	GO:0016021	GO:0016023	GO:0016328	GO:0043481	GO:0044036	GO:0045177	GO:0048364	GO:0048439
gi_351628408_gb_JP481291.1	GO:0002679	GO:0004674	GO:0005524	GO:0005886	GO:0006468	GO:0006612	GO:0006944	GO:0007169	GO:0009506	GO:0009611	GO:0009628	GO:0009693	GO:0009863	GO:0010193	GO:0010200	GO:0010363	GO:0042742	GO:0043069	GO:0046777	GO:0050832
gi_351628437_gb_JP481320.1	GO:0005488	GO:0006952	GO:0044464
gi_351628462_gb_JP481345.1	GO:0005829	GO:0005980	GO:0006006	GO:0008184	GO:0009409	GO:0009414	GO:0009507	GO:0009570	GO:0019252	GO:0030170	GO:0042742	GO:0044281	GO:0046686
gi_351628475_gb_JP481358.1	GO:0004623	GO:0006629	GO:0008152	GO:0047714
gi_351628478_gb_JP481361.1	GO:0005215	GO:0005886	GO:0009507	GO:0009705	GO:0010167	GO:0015112	GO:0015113	GO:0015706	GO:0016021	GO:0048527	GO:0055085	GO:0071249	GO:0080167
gi_351628543_gb_JP481426.1	GO:0005506	GO:0009055	GO:0009411	GO:0009733	GO:0009813	GO:0016020	GO:0016099	GO:0016711	GO:0019825	GO:0020037	GO:0033773	GO:0043231	GO:0044444	GO:0046246	GO:0046872	GO:0055114	GO:0071281	GO:0097007	GO:0097008
gi_351628547_gb_JP481430.1	GO:0005576	GO:0009505	GO:0009506	GO:0010015	GO:0080167
gi_351628554_gb_JP481437.1	GO:0004190	GO:0006508	GO:0006952	GO:0008233	GO:0009505	GO:0009507	GO:0009719	GO:0010033	GO:0043231	GO:0044237	GO:0044444	GO:0048046	GO:0050794	GO:0051707	GO:0051716	GO:0071704
gi_351628557_gb_JP481440.1	GO:0005515	GO:0005829	GO:0006950	GO:0009555	GO:0009809	GO:0009963	GO:0009987	GO:0010252	GO:0016020	GO:0016410	GO:0016413	GO:0016747	GO:0044271	GO:0045229	GO:0047172	GO:0047205	GO:0050266
gi_351628572_gb_JP481455.1	GO:0022402
gi_351628661_gb_JP481544.1	GO:0000271	GO:0000303	GO:0005515	GO:0005524	GO:0005634	GO:0005886	GO:0006200	GO:0006888	GO:0007155	GO:0008361	GO:0008559	GO:0009407	GO:0009414	GO:0009506	GO:0009624	GO:0009630	GO:0009637	GO:0009640	GO:0009735	GO:0009738	GO:0009743	GO:0009753	GO:0009793	GO:0009825	GO:0009873	GO:0009932	GO:0009958	GO:0010048	GO:0010090	GO:0010160	GO:0010218	GO:0010228	GO:0010315	GO:0010328	GO:0010329	GO:0010540	GO:0010541	GO:0010583	GO:0016021	GO:0042538	GO:0043090	GO:0043161	GO:0043248	GO:0043481	GO:0045010	GO:0048440	GO:0048443	GO:0048527	GO:0048767
gi_351628680_gb_JP481563.1	GO:0007275	GO:0010817	GO:0016020	GO:0016043	GO:0016049	GO:0031325	GO:0043231	GO:0044238	GO:0044444	GO:0048869	GO:0060560
gi_351628716_gb_JP481599.1	GO:0003676	GO:0044464
gi_351628770_gb_JP481653.1	GO:0009416	GO:0009606	GO:0009637	GO:0009908	GO:0009932	GO:0010051	GO:0010087	GO:0010817	GO:0016020	GO:0043231	GO:0044260	GO:0044444	GO:0048364	GO:0048588	GO:0048731	GO:0048827	GO:0050789	GO:0071554	GO:0071840	GO:0071944	GO:2000026
gi_351628796_gb_JP481679.1	GO:0004069	GO:0005737	GO:0006417	GO:0006865	GO:0008793	GO:0009693	GO:0009733	GO:0009735	GO:0010200	GO:0016847	GO:0030170	GO:0042218	GO:0042802	GO:0071281
gi_351628805_gb_JP481688.1	GO:0000186	GO:0004674	GO:0004709	GO:0005524	GO:0005576	GO:0005773	GO:0005886	GO:0006007	GO:0006569	GO:0006970	GO:0006996	GO:0007126	GO:0007169	GO:0009506	GO:0009507	GO:0009684	GO:0009742	GO:0009791	GO:0009860	GO:0010035	GO:0010483	GO:0016324	GO:0030003	GO:0030048	GO:0032440	GO:0033692	GO:0043680	GO:0044242	GO:0046777	GO:0048765	GO:0050832	GO:0051510	GO:0052541	GO:0052546	GO:0055114	GO:0070838	GO:0090404
gi_351628819_gb_JP481702.1	GO:0000166	GO:0006098	GO:0006364	GO:0007623	GO:0009508	GO:0009526	GO:0009535	GO:0009637	GO:0009902	GO:0009941	GO:0010027	GO:0010103	GO:0010114	GO:0010218	GO:0015995	GO:0016020	GO:0016117	GO:0019684	GO:0019761	GO:0044434
gi_351628820_gb_JP481703.1	GO:0000209	GO:0005488	GO:0016874	GO:0032502	GO:0044424	GO:0046872
gi_351628836_gb_JP481719.1	GO:0005515	GO:0005634	GO:0005875	GO:0005886	GO:0005929	GO:0007018	GO:0007368	GO:0008152	GO:0009653	GO:0016043	GO:0048513	GO:0050794	GO:0050896
gi_351628842_gb_JP481725.1	GO:0004673	GO:0005351	GO:0005524	GO:0005739	GO:0005983	GO:0007623	GO:0009401	GO:0009570	GO:0009610	GO:0009631	GO:0009941	GO:0016310	GO:0019252	GO:0046872	GO:0050521
gi_351628867_gb_JP481750.1	GO:0000166	GO:0004672	GO:0004674	GO:0005516	GO:0005773	GO:0005886	GO:0006457	GO:0006857	GO:0008152	GO:0009408	GO:0009506	GO:0009627	GO:0009644	GO:0009737	GO:0009751	GO:0010150	GO:0010193	GO:0012501	GO:0016491	GO:0031347	GO:0034976	GO:0042542	GO:0042742	GO:0043167	GO:0046777
gi_351628882_gb_JP481765.1	GO:0005488	GO:0006950	GO:0008152	GO:0009628	GO:0009987	GO:0043231
gi_351628903_gb_JP481786.1	GO:0000166	GO:0004674	GO:0004713	GO:0005634	GO:0005773	GO:0005886	GO:0006952	GO:0009506	GO:0009875	GO:0016310	GO:0031625	GO:0046777	GO:0050794
gi_351628922_gb_JP481805.1	GO:0005524	GO:0006200	GO:0009506	GO:0009611	GO:0009651	GO:0009737	GO:0009897	GO:0010025	GO:0015245	GO:0015893	GO:0015908	GO:0016020	GO:0016887	GO:0042626	GO:0043231	GO:0044281	GO:0046983	GO:0072521	GO:0080051	GO:0080172
gi_351628923_gb_JP481806.1	GO:0000226	GO:0000776	GO:0000779	GO:0000911	GO:0003774	GO:0003777	GO:0005515	GO:0005524	GO:0005634	GO:0005871	GO:0005874	GO:0006468	GO:0006810	GO:0007018	GO:0007059	GO:0007088	GO:0008017	GO:0008270	GO:0009555	GO:0009558	GO:0015630	GO:0022607	GO:0032879	GO:0034613	GO:0042995	GO:0044430	GO:0044444	GO:0048522	GO:0050896	GO:0051130	GO:0051276	GO:0051640	GO:0051649	GO:0065008
gi_351628976_gb_JP481859.1	GO:0005488	GO:0006952
gi_351628977_gb_JP481860.1	GO:0005774	GO:0006863	GO:0009826	GO:0010817	GO:0016020	GO:0019761	GO:0031325	GO:0044238	GO:0048513	GO:0050896	GO:0071554
gi_351628978_gb_JP481861.1	GO:0000023	GO:0000235	GO:0000394	GO:0000911	GO:0001578	GO:0003700	GO:0003777	GO:0005524	GO:0005634	GO:0005737	GO:0005815	GO:0005871	GO:0005872	GO:0005874	GO:0006084	GO:0006200	GO:0006275	GO:0006306	GO:0006346	GO:0007018	GO:0007019	GO:0007062	GO:0007100	GO:0007129	GO:0007131	GO:0008017	GO:0008569	GO:0008574	GO:0009062	GO:0009086	GO:0009524	GO:0009723	GO:0009736	GO:0009855	GO:0009909	GO:0009971	GO:0010051	GO:0010075	GO:0010094	GO:0010103	GO:0010228	GO:0010332	GO:0010389	GO:0010583	GO:0016020	GO:0016117	GO:0016572	GO:0016887	GO:0019252
gi_351629020_gb_JP481903.1	GO:0001523	GO:0009570	GO:0009733	GO:0009830	GO:0009850	GO:0009926	GO:0009965	GO:0010223	GO:0016121	GO:0016124	GO:0016702	GO:0046872	GO:0050789	GO:0055114
gi_351629027_gb_JP481910.1	GO:0004672	GO:0005783	GO:0005856	GO:0006468	GO:0006874	GO:0006886	GO:0007166	GO:0008092	GO:0009651	GO:0010608	GO:0010646	GO:0015672	GO:0016192	GO:0016482	GO:0019899	GO:0030016	GO:0030054	GO:0031323	GO:0031981	GO:0032386	GO:0032412	GO:0033365	GO:0035556	GO:0042981	GO:0044093	GO:0044304	GO:0044449	GO:0044459	GO:0045202	GO:0048519	GO:0048522	GO:0048667	GO:0048812	GO:0051050	GO:0051924	GO:0071363	GO:0072659	GO:0086001	GO:0086004	GO:0086019	GO:0086070	GO:0090150	GO:2000021
gi_351629055_gb_JP481938.1	GO:0005886	GO:0006995	GO:0015204	GO:0015370	GO:0016021	GO:0035725	GO:0071918
gi_351629058_gb_JP481941.1	GO:0004252	GO:0006508	GO:0009505	GO:0009897	GO:0010103	GO:0042127	GO:0042802	GO:0043086	GO:0048046	GO:0048359	GO:0080001
gi_351629064_gb_JP481947.1	GO:0000165	GO:0006098	GO:0006364	GO:0006612	GO:0006754	GO:0007165	GO:0009409	GO:0009534	GO:0009535	GO:0009595	GO:0009697	GO:0009772	GO:0009773	GO:0009862	GO:0009867	GO:0009941	GO:0010027	GO:0010033	GO:0010200	GO:0010207	GO:0010287	GO:0010310	GO:0010319	GO:0010363	GO:0015078	GO:0015986	GO:0015992	GO:0015995	GO:0016043	GO:0016820	GO:0017111	GO:0019252	GO:0019288	GO:0019684	GO:0019760	GO:0031348	GO:0033178	GO:0042651	GO:0042742	GO:0043900	GO:0045087	GO:0045259	GO:0050832	GO:0051707	GO:0055114
gi_351629092_gb_JP481975.1	GO:0000271	GO:0004506	GO:0005576	GO:0005789	GO:0006695	GO:0006725	GO:0008204	GO:0009414	GO:0009611	GO:0009744	GO:0009753	GO:0009813	GO:0010224	GO:0010264	GO:0016021	GO:0016132	GO:0019745	GO:0042594	GO:0044182	GO:0050660	GO:0051716	GO:0055114
gi_351629105_gb_JP481988.1	GO:0005737	GO:0009611	GO:0009627	GO:0009699	GO:0009805	GO:0009963	GO:0016410	GO:0016413	GO:0034641	GO:0034976	GO:0044238	GO:0045229	GO:0050643	GO:0050734	GO:0050896
gi_351629172_gb_JP482055.1	GO:0005737	GO:0009701	GO:0009812	GO:0009821	GO:0016206	GO:0030746	GO:0030761	GO:0030766	GO:0032259	GO:0033799	GO:0033800	GO:0042803	GO:0046983
gi_351629175_gb_JP482058.1	GO:0000272	GO:0001558	GO:0001708	GO:0002237	GO:0004674	GO:0005515	GO:0005524	GO:0005576	GO:0005739	GO:0005982	GO:0006468	GO:0007049	GO:0008356	GO:0009507	GO:0009553	GO:0009628	GO:0009664	GO:0009686	GO:0009740	GO:0009793	GO:0009827	GO:0009845	GO:0009860	GO:0009909	GO:0009933	GO:0009944	GO:0009965	GO:0010015	GO:0010075	GO:0010103	GO:0010148	GO:0010431	GO:0010468	GO:0016020	GO:0016021	GO:0019199	GO:0030155	GO:0031540	GO:0032440	GO:0034645	GO:0042742	GO:0048281	GO:0048441	GO:0048481	GO:0048518	GO:0048646	GO:0048653	GO:0050832	GO:0051302
gi_351629180_gb_JP482063.1	GO:0001568	GO:0001758	GO:0001889	GO:0001936	GO:0001947	GO:0004028	GO:0004029	GO:0004030	GO:0005099	GO:0005497	GO:0005524	GO:0005634	GO:0005759	GO:0005829	GO:0005975	GO:0006069	GO:0006805	GO:0008284	GO:0008285	GO:0009055	GO:0009507	GO:0009627	GO:0009699	GO:0009952	GO:0009954	GO:0010167	GO:0010628	GO:0014032	GO:0015706	GO:0016331	GO:0016918	GO:0018479	GO:0021915	GO:0030182	GO:0030324	GO:0030900	GO:0030902	GO:0031016	GO:0031076	GO:0032320	GO:0032355	GO:0032496	GO:0032570	GO:0032870	GO:0033574	GO:0034097	GO:0034976	GO:0035094	GO:0035115
gi_351629183_gb_JP482066.1	GO:0003700	GO:0005515	GO:0005634	GO:0006355	GO:0006952	GO:0006970	GO:0009409	GO:0009414	GO:0009737	GO:0009743	GO:0009873	GO:0010200	GO:0042802	GO:0042991	GO:0043565	GO:0044281	GO:0048364	GO:0048366	GO:0048523	GO:0048825	GO:1901137
gi_351629185_gb_JP482068.1	GO:0009507	GO:0009523	GO:0009535	GO:0015979	GO:0034357	GO:0044425
gi_351629215_gb_JP482098.1	GO:0006098	GO:0009535	GO:0009773	GO:0010207	GO:0010598	GO:0016117	GO:0016757
gi_351629234_gb_JP482117.1	GO:0005634	GO:0005737	GO:0005886	GO:0008171	GO:0009506	GO:0009809	GO:0030744	GO:0030755	GO:0030761	GO:0032259	GO:0033799	GO:0044238	GO:0044283	GO:0046983	GO:0047763	GO:0051555
gi_351629237_gb_JP482120.1	GO:0005886	GO:0009658	GO:0009706	GO:0010027	GO:0030003	GO:0070838
gi_351629244_gb_JP482127.1	GO:0000022	GO:0000235	GO:0003002	GO:0003777	GO:0005516	GO:0005524	GO:0005634	GO:0005739	GO:0005813	GO:0005871	GO:0005874	GO:0005875	GO:0005886	GO:0005915	GO:0006260	GO:0006342	GO:0006796	GO:0007018	GO:0007019	GO:0007127	GO:0008017	GO:0008283	GO:0008569	GO:0008574	GO:0009060	GO:0009725	GO:0009846	GO:0010016	GO:0010091	GO:0016570	GO:0016887	GO:0019752	GO:0043254	GO:0043414	GO:0044255	GO:0044262	GO:0045132	GO:0045218	GO:0048438	GO:0048449	GO:0051052	GO:0051258	GO:0051298	GO:0051301	GO:0051716	GO:0060236	GO:0065008	GO:0090136	GO:0090306
gi_351629324_gb_JP482207.1	GO:0008152	GO:0016020	GO:0016823	GO:0050794	GO:0052689	GO:0071944
gi_351629358_gb_JP482241.1	GO:0000165	GO:0003959	GO:0004324	GO:0005507	GO:0005515	GO:0005829	GO:0006098	GO:0006364	GO:0006612	GO:0008266	GO:0009409	GO:0009535	GO:0009570	GO:0009595	GO:0009657	GO:0009697	GO:0009773	GO:0009817	GO:0009842	GO:0009853	GO:0009862	GO:0009867	GO:0009941	GO:0010103	GO:0010200	GO:0010207	GO:0010310	GO:0010363	GO:0019761	GO:0031348	GO:0031977	GO:0042742	GO:0043085	GO:0043900	GO:0045156	GO:0045157	GO:0048046	GO:0050660	GO:0050661
gi_351629369_gb_JP482252.1	GO:0000165	GO:0003677	GO:0003700	GO:0005634	GO:0005700	GO:0005730	GO:0005737	GO:0006259	GO:0006333	GO:0006337	GO:0006338	GO:0006612	GO:0007379	GO:0007480	GO:0008301	GO:0008348	GO:0009617	GO:0009862	GO:0009867	GO:0009965	GO:0010310	GO:0010363	GO:0017025	GO:0017055	GO:0019907	GO:0030154	GO:0031348	GO:0035304	GO:0043388	GO:0043565	GO:0045665	GO:0045893	GO:0046982
gi_351629402_gb_JP482285.1	GO:0005634	GO:0009570	GO:0009941	GO:0016117	GO:0019288
gi_351629415_gb_JP482298.1	GO:0005515	GO:0005634	GO:0005886	GO:0034613	GO:0050789
gi_351629420_gb_JP482303.1	GO:0005783	GO:0009411	GO:0009733	GO:0009813	GO:0016036	GO:0016099	GO:0016102	GO:0016491	GO:0016711	GO:0019375	GO:0031090	GO:0036202	GO:0042631	GO:0044425	GO:0046872	GO:0055114
gi_351629430_gb_JP482313.1	GO:0005488	GO:0006952	GO:0044464
gi_351629440_gb_JP482323.1	GO:0000325	GO:0005524	GO:0005730	GO:0005774	GO:0005794	GO:0005887	GO:0006200	GO:0006690	GO:0006767	GO:0006855	GO:0006979	GO:0008559	GO:0009407	GO:0009408	GO:0009506	GO:0015432	GO:0015446	GO:0015700	GO:0015722	GO:0015732	GO:0016021	GO:0016323	GO:0016324	GO:0019904	GO:0030644	GO:0031427	GO:0032355	GO:0032440	GO:0032496	GO:0033559	GO:0042626	GO:0046685	GO:0055085	GO:0055114	GO:0070327	GO:0071992
gi_351629441_gb_JP482324.1	GO:0044464
[truncated: 19 more columns]

## Sheet: DEGs.GO.enrichment.st
GO categories	#GO_classify	All Unigene	DEG Unigene	P-values
biological process	cellular process	21282	898	0.0421953
biological process	metabolic process	20495	855	0.0417175
biological process	response to stimulus	14611	744	0.0509205
biological process	biological regulation	13561	639	0.0471204
biological process	developmental process	10852	514	0.0473645
biological process	cellular component organization or biogenesis	10312	487	0.0472265
biological process	localization	8619	405	0.0469892
biological process	multicellular organismal process	8624	391	0.0453386
biological process	establishment of localization	7966	378	0.0474517
biological process	multi-organism process	4917	294	0.0597926
biological process	reproduction	6554	292	0.0445529
biological process	reproductive process	6362	291	0.0457403
biological process	signaling	4896	239	0.0488154
biological process	growth	3014	184	0.0610484
biological process	immune system process	3115	122	0.0391653
biological process	pigmentation	426	36	0.084507
biological process	death	876	21	0.0239726
biological process	rhythmic process	400	19	0.0475
biological process	cell proliferation	437	15	0.0343249
biological process	locomotion	606	14	0.0231023
biological process	biological adhesion	330	12	0.0363636
biological process	viral reproduction	328	7	0.0213415
biological process	cell killing	16	4	0.25
biological process	carbon utilization	16	2	0.125
biological process	nitrogen utilization	2	0	0
biological process	phenotypic switching	10	0	0
cellular component	cell part	22307	937	0.0420048
cellular component	cell	21940	908	0.0413856
cellular component	organelle	19924	806	0.0404537
cellular component	membrane	11184	577	0.0515916
cellular component	organelle part	9369	375	0.0400256
cellular component	extracellular region	2648	233	0.0879909
cellular component	membrane part	4308	230	0.053389
cellular component	cell junction	2939	183	0.0622661
cellular component	macromolecular complex	4724	134	0.0283658
cellular component	membrane-enclosed lumen	1671	32	0.0191502
cellular component	extracellular region part	242	14	0.0578512
cellular component	extracellular matrix	87	9	0.103448
cellular component	synapse	200	5	0.025
cellular component	synapse part	136	2	0.0147059
cellular component	nucleoid	100	1	0.01
cellular component	extracellular matrix part	26	1	0.0384615
cellular component	virion	16	0	0
cellular component	virion part	11	0	0
molecular function	binding	17028	680	0.0399342
molecular function	catalytic activity	14764	638	0.0432132
molecular function	transporter activity	2106	104	0.0493827
molecular function	nucleic acid binding transcription factor activity	1283	59	0.045986
molecular function	molecular transducer activity	798	42	0.0526316
molecular function	receptor activity	474	33	0.0696203
molecular function	antioxidant activity	255	27	0.105882
molecular function	electron carrier activity	455	24	0.0527473
molecular function	enzyme regulator activity	572	24	0.041958
molecular function	structural molecule activity	690	14	0.0202899
molecular function	nutrient reservoir activity	54	11	0.203704
molecular function	protein binding transcription factor activity	273	8	0.029304
molecular function	metallochaperone activity	17	1	0.0588235
molecular function	channel regulator activity	27	0	0
molecular function	receptor regulator activity	3	0	0
molecular function	protein tag	5	0	0
molecular function	translation regulator activity	41	0	0
