# Supplementary material for: Genome-Wide Expression Profiles of Hemp (Cannabis sativa L.) in Response to Drought Stress
Source: Int J Genomics. 2018 May 15;2018:3057272. doi: 10.1155/2018/3057272 (PMC5976996; doi:10.1155/2018/3057272)
Supplement: Supplementary 5 — Table S4: details of 11 significantly enriched KEGG pathways in DEGs. [file 3057272.f5.xls]

## Sheet: Significantly Enriched
#KEGG pathways, Significantly eriched
#Pathway	ko_ID	Unigene	gene	Genes	log2FC	Regulated	ko	Swissprot_annotation	nr_annotation
Plant hormone signal transduction	ko04075	15	199	gi_351591074_gb_JP449530.1	-2.61822	down	k14496	Abscisic acid receptor PYL4 OS=Arabidopsis thaliana GN=PYL4 PE=1 SV=1	PREDICTED: abscisic acid receptor PYL4-like [Fragaria vesca subsp. vesca]
Plant hormone signal transduction	ko04075	15	199	gi_351600776_gb_JP455237.1	3.15327	up	k14497	Protein phosphatase 2C 37 OS=Arabidopsis thaliana GN=PP2CA PE=1 SV=1	hypothetical protein PRUPE_ppa026727mg, partial [Prunus persica]
Plant hormone signal transduction	ko04075	15	199	gi_351603881_gb_JP458236.1	-1.03237	down	k13464	Protein TIFY 6B OS=Arabidopsis thaliana GN=TIFY6B PE=1 SV=1	hypothetical protein PRUPE_ppa008065mg [Prunus persica]
Plant hormone signal transduction	ko04075	15	199	gi_351607005_gb_JP461329.1	-1.31184	down	k14488	Indole-3-acetic acid-induced protein ARG7 OS=Vigna radiata var. radiata GN=ARG7 PE=2 SV=1	hypothetical protein PRUPE_ppa012885mg [Prunus persica]
Plant hormone signal transduction	ko04075	15	199	gi_351612001_gb_JP466302.1	-1.32623	down	k13946	Auxin transporter-like protein 2 OS=Medicago truncatula GN=LAX2 PE=2 SV=1	PREDICTED: auxin transporter-like protein 2-like [Cicer arietinum]
Plant hormone signal transduction	ko04075	15	199	gi_351615261_gb_JP469562.1	2.587	up	k14497	Probable protein phosphatase 2C 78 OS=Arabidopsis thaliana GN=At5g59220 PE=2 SV=1	Highly ABA-induced PP2C gene 2 isoform 1 [Theobroma cacao]
Plant hormone signal transduction	ko04075	15	199	gi_351617736_gb_JP472037.1	-1.6763	down	k14488	Auxin-induced protein X15 OS=Glycine max PE=2 SV=1	PREDICTED: uncharacterized protein LOC101294039 [Fragaria vesca subsp. vesca]
Plant hormone signal transduction	ko04075	15	199	gi_351618741_gb_JP473042.1	1.72986	up	k14497	Probable protein phosphatase 2C 6 OS=Oryza sativa subsp. japonica GN=Os01g0583100 PE=2 SV=1	hypothetical protein PRUPE_ppa006926mg [Prunus persica]
Plant hormone signal transduction	ko04075	15	199	gi_351619546_gb_JP473847.1	-2.36885	down	k14488	Auxin-induced protein X15 OS=Glycine max PE=2 SV=1	hypothetical protein PRUPE_ppa015749mg [Prunus persica]
Plant hormone signal transduction	ko04075	15	199	gi_351620096_gb_JP474397.1	1.36061	up	k14497	Protein phosphatase 2C 77 OS=Arabidopsis thaliana GN=ABI2 PE=1 SV=1	hypothetical protein PRUPE_ppa005286mg [Prunus persica]
Plant hormone signal transduction	ko04075	15	199	gi_351621532_gb_JP475833.1	-1.08884	down	k14431	Transcription factor TGA7 OS=Arabidopsis thaliana GN=TGA7 PE=1 SV=1	PREDICTED: transcription factor TGA4 [Vitis vinifera]
Plant hormone signal transduction	ko04075	15	199	gi_351623117_gb_JP477418.1	2.50435	up	k14497	Probable protein phosphatase 2C 78 OS=Arabidopsis thaliana GN=At5g59220 PE=2 SV=1	Highly ABA-induced PP2C gene 2 isoform 1 [Theobroma cacao]
Plant hormone signal transduction	ko04075	15	199	gi_351623634_gb_JP477935.1	1.28883	up	k14498	Serine/threonine-protein kinase SAPK3 OS=Oryza sativa subsp. japonica GN=SAPK3 PE=1 SV=1	Serine/threonine-protein kinase SAPK3, putative [Ricinus communis]
Plant hormone signal transduction	ko04075	15	199	gi_351623983_gb_JP478284.1	1.74154	up	k14497	Probable protein phosphatase 2C 8 OS=Oryza sativa subsp. japonica GN=Os01g0656200 PE=2 SV=1	hypothetical protein PRUPE_ppa016016mg [Prunus persica]
Plant hormone signal transduction	ko04075	15	199	gi_351625727_gb_JP480028.1	-1.57071	down	k14487	Indole-3-acetic acid-amido synthetase GH3.6 OS=Arabidopsis thaliana GN=GH3.6 PE=1 SV=1	indole-3-acetic acid amido synthetase [Morus alba var. multicaulis]
Photosynthesis	ko00195	14	62	gi_351597439_gb_JP451985.1	-1.41784	down	K08901	Oxygen-evolving enhancer protein 3-2, chloroplastic OS=Arabidopsis thaliana GN=PSBQ2 PE=1 SV=2	hypothetical protein PRUPE_ppa010884mg [Prunus persica]
Photosynthesis	ko00195	14	62	gi_351602169_gb_JP456600.1	-1.53142	down	K02698	Photosystem I reaction center subunit psaK, chloroplastic OS=Arabidopsis thaliana GN=PSAK PE=2 SV=2	PREDICTED: photosystem I reaction center subunit psaK, chloroplastic [Vitis vinifera]
Photosynthesis	ko00195	14	62	gi_351604153_gb_JP458507.1	-1.36836	down	K02716	Oxygen-evolving enhancer protein 1, chloroplastic OS=Nicotiana tabacum GN=PSBO PE=2 SV=1	chloroplast PsbO4 precursor [Nicotiana benthamiana]
Photosynthesis	ko00195	14	62	gi_351611422_gb_JP465723.1	-1.17517	down	K02693	Photosystem I reaction center subunit IV B, chloroplastic OS=Nicotiana sylvestris GN=PSAEB PE=1 SV=1	photosystem I psaE [Morus alba var. multicaulis]
Photosynthesis	ko00195	14	62	gi_351611463_gb_JP465764.1	-1.24053	down	K08905	Photosystem I reaction center subunit V, chloroplastic OS=Arabidopsis thaliana GN=PSAG PE=1 SV=1	PREDICTED: photosystem I reaction center subunit V, chloroplastic-like [Fragaria vesca subsp. vesca]
Photosynthesis	ko00195	14	62	gi_351611618_gb_JP465919.1	-1.24632	down	K02723	Photosystem II core complex proteins psbY, chloroplastic OS=Arabidopsis thaliana GN=PSBY PE=2 SV=1	PREDICTED: photosystem II core complex proteins psbY, chloroplastic-like [Vitis vinifera]
Photosynthesis	ko00195	14	62	gi_351616251_gb_JP470552.1	-1.98192	down	K02639	Ferredoxin, chloroplastic OS=Capsicum annuum GN=AP1 PE=1 SV=1	chloroplast ferredoxin I [Camellia sinensis]
Photosynthesis	ko00195	14	62	gi_351620896_gb_JP475197.1	-1.5944	down	K02701	Photosystem I reaction center subunit N, chloroplastic OS=Arabidopsis thaliana GN=PSAN PE=1 SV=2	predicted protein [Populus trichocarpa]
Photosynthesis	ko00195	14	62	gi_351621674_gb_JP475975.1	-1.447	down	K08903	Photosystem II reaction center PSB28 protein, chloroplastic OS=Oryza sativa subsp. japonica GN=PSB28 PE=2 SV=2	hypothetical protein PRUPE_ppa012196mg [Prunus persica]
Photosynthesis	ko00195	14	62	gi_351623166_gb_JP477467.1	-1.31133	down	K02639	Ferredoxin-2, chloroplastic OS=Arabidopsis thaliana GN=FD2 PE=1 SV=1	chloroplast ferredoxin I [Camellia sinensis]
Photosynthesis	ko00195	14	62	gi_351624200_gb_JP478501.1	-1.07363	down	K02692	Photosystem I reaction center subunit II, chloroplastic OS=Cucumis sativus GN=psaD PE=1 SV=1	photosystem I subunit PsaD [Glycine max]
Photosynthesis	ko00195	14	62	gi_351629064_gb_JP481947.1	-1.70726	down	K02113	ATP synthase delta chain, chloroplastic OS=Nicotiana tabacum GN=ATPD PE=2 SV=1	hypothetical protein PRUPE_ppa010263mg [Prunus persica]
Photosynthesis	ko00195	14	62	gi_351629185_gb_JP482068.1	-1.12103	down	K02721	Photosystem II reaction center W protein, chloroplastic OS=Spinacia oleracea GN=psbW PE=1 SV=1	hypothetical protein PRUPE_ppa012535mg [Prunus persica]
Photosynthesis	ko00195	14	62	gi_351629358_gb_JP482241.1	-1.54577	down	K02641	Ferredoxin--NADP reductase, leaf-type isozyme, chloroplastic OS=Nicotiana tabacum GN=PETH PE=2 SV=1	predicted protein [Populus trichocarpa]
Phenylpropanoid biosynthesis	ko00940	14	132	gi_351590887_gb_JP449345.1	-1.9778	down	K00430	Peroxidase 12 OS=Arabidopsis thaliana GN=PER12 PE=1 SV=1	hypothetical protein PRUPE_ppa007748mg [Prunus persica]
Phenylpropanoid biosynthesis	ko00940	14	132	gi_351595740_gb_JP450305.1	-1.26734	down	K00430	Peroxidase 4 OS=Vitis vinifera GN=GSVIVT00023967001 PE=1 SV=1	Peroxidase superfamily protein [Theobroma cacao]
Phenylpropanoid biosynthesis	ko00940	14	132	gi_351596930_gb_JP451483.1	1.64952	up	K00430	Peroxidase 47 OS=Arabidopsis thaliana GN=PER47 PE=2 SV=2	Peroxidase 47 precursor, putative [Ricinus communis]
Phenylpropanoid biosynthesis	ko00940	14	132	gi_351596945_gb_JP451498.1	-2.8148	down	K01188	Beta-glucosidase 12 OS=Oryza sativa subsp. japonica GN=BGLU12 PE=2 SV=2	beta-glucosidase, putative [Ricinus communis]
Phenylpropanoid biosynthesis	ko00940	14	132	gi_351596970_gb_JP451523.1	-1.70262	down	K05350	Beta-glucosidase 46 OS=Arabidopsis thaliana GN=BGLU46 PE=1 SV=2	hypothetical protein PRUPE_ppa004523mg [Prunus persica]
Phenylpropanoid biosynthesis	ko00940	14	132	gi_351598627_gb_JP453142.1	-2.73058	down	K05350	Beta-glucosidase 44 OS=Arabidopsis thaliana GN=BGLU44 PE=2 SV=1	hypothetical protein PRUPE_ppa004380mg [Prunus persica]
Phenylpropanoid biosynthesis	ko00940	14	132	gi_351600324_gb_JP454795.1	-4.30979	down	K00430	Peroxidase 27 OS=Arabidopsis thaliana GN=PER27 PE=1 SV=1	hypothetical protein PRUPE_ppa023088mg [Prunus persica]
Phenylpropanoid biosynthesis	ko00940	14	132	gi_351603836_gb_JP458191.1	-1.03155	down	K09755	Cytochrome P450 71A1 OS=Persea americana GN=CYP71A1 PE=1 SV=2	hypothetical protein PRUPE_ppa022041mg [Prunus persica]
Phenylpropanoid biosynthesis	ko00940	14	132	gi_351605939_gb_JP460278.1	-3.01408	down	K00430	Peroxidase 53 OS=Arabidopsis thaliana GN=PER53 PE=1 SV=1	hypothetical protein PRUPE_ppa008390mg [Prunus persica]
Phenylpropanoid biosynthesis	ko00940	14	132	gi_351613177_gb_JP467478.1	-2.08474	down	K00430	Peroxidase 3 OS=Arabidopsis thaliana GN=PER3 PE=2 SV=1	hypothetical protein PRUPE_ppa008540mg [Prunus persica]
Phenylpropanoid biosynthesis	ko00940	14	132	gi_351623829_gb_JP478130.1	-2.90905	down	K00430	Peroxidase 72 OS=Arabidopsis thaliana GN=PER72 PE=1 SV=1	predicted protein [Populus trichocarpa]
Phenylpropanoid biosynthesis	ko00940	14	132	gi_351625374_gb_JP479675.1	-1.36816	down	K00430	Peroxidase 17 OS=Arabidopsis thaliana GN=PER17 PE=2 SV=1	PREDICTED: peroxidase 17-like [Fragaria vesca subsp. vesca]
Phenylpropanoid biosynthesis	ko00940	14	132	gi_351628557_gb_JP481440.1	1.59395	up	K13065	Shikimate O-hydroxycinnamoyltransferase OS=Arabidopsis thaliana GN=HST PE=2 SV=1	hypothetical protein PRUPE_ppa005955mg [Prunus persica]
Phenylpropanoid biosynthesis	ko00940	14	132	gi_351629180_gb_JP482063.1	Inf	down	K12355	Aldehyde dehydrogenase family 2 member C4 OS=Arabidopsis thaliana GN=ALDH2C4 PE=1 SV=2	hypothetical protein PRUPE_ppa004555mg [Prunus persica]
Carbon fixation in photosynthetic organisms	ko00710	9	84	gi_351591232_gb_JP449682.1	-1.33817	down	K01807	Probable ribose-5-phosphate isomerase OS=Arabidopsis thaliana GN=At2g01290 PE=2 SV=1	hypothetical protein PRUPE_ppa009739mg [Prunus persica]
Carbon fixation in photosynthetic organisms	ko00710	9	84	gi_351596998_gb_JP451550.1	-1.71435	down	K05298	Glyceraldehyde-3-phosphate dehydrogenase GAPA1, chloroplastic OS=Arabidopsis thaliana GN=GAPA1 PE=1 SV=3	glyceraldehyde-3-phosphate dehydrogenase [Arachis hypogaea]
Carbon fixation in photosynthetic organisms	ko00710	9	84	gi_351597687_gb_JP452228.1	-1.73733	down	K05298	Glyceraldehyde-3-phosphate dehydrogenase B, chloroplastic OS=Pisum sativum GN=GAPB PE=1 SV=2	hypothetical protein PRUPE_ppa005598mg [Prunus persica]
Carbon fixation in photosynthetic organisms	ko00710	9	84	gi_351603821_gb_JP458176.1	-1.47677	down	K00927	Phosphoglycerate kinase, chloroplastic OS=Nicotiana tabacum PE=1 SV=1	hypothetical protein PRUPE_ppa005031mg [Prunus persica]
Carbon fixation in photosynthetic organisms	ko00710	9	84	gi_351616200_gb_JP470501.1	-3.07631	down	K01602	Ribulose bisphosphate carboxylase small chain, chloroplastic OS=Fagus crenata GN=RBCS1 PE=2 SV=1	chloroplast ribulose-1,5-bisphosphate carboxylase/oxygenase small subunit [Fagus sylvatica]
Carbon fixation in photosynthetic organisms	ko00710	9	84	gi_351619565_gb_JP473866.1	3.9999	up	K01610	Phosphoenolpyruvate carboxykinase [ATP] OS=Arabidopsis thaliana GN=PCKA PE=1 SV=1	phosphoenolpyruvate carboxykinase [Spinifex littoreus]
Carbon fixation in photosynthetic organisms	ko00710	9	84	gi_351622628_gb_JP476929.1	-1.05037	down	K00028	NAD-dependent malic enzyme 59 kDa isoform, mitochondrial OS=Solanum tuberosum PE=1 SV=1	malic enzyme, putative [Ricinus communis]
Carbon fixation in photosynthetic organisms	ko00710	9	84	gi_351623497_gb_JP477798.1	-2.12087	down	K01623	Fructose-bisphosphate aldolase, cytoplasmic isozyme 1 OS=Pisum sativum PE=1 SV=1	PREDICTED: fructose-bisphosphate aldolase, cytoplasmic isozyme 1-like [Solanum lycopersicum]
Carbon fixation in photosynthetic organisms	ko00710	9	84	gi_351624080_gb_JP478381.1	-1.69471	down	K01807	Ribose-5-phosphate isomerase A OS=Gluconobacter oxydans (strain 621H) GN=rpiA PE=3 SV=1	hypothetical protein PRUPE_ppa009259mg [Prunus persica]
Cyanoamino acid metabolism	ko00460	8	55	gi_351596945_gb_JP451498.1	-2.8148	down	K01188	Beta-glucosidase 12 OS=Oryza sativa subsp. japonica GN=BGLU12 PE=2 SV=2	beta-glucosidase, putative [Ricinus communis]
Cyanoamino acid metabolism	ko00460	8	55	gi_351596970_gb_JP451523.1	-1.70262	down	K05350	Beta-glucosidase 46 OS=Arabidopsis thaliana GN=BGLU46 PE=1 SV=2	hypothetical protein PRUPE_ppa004523mg [Prunus persica]
Cyanoamino acid metabolism	ko00460	8	55	gi_351597547_gb_JP452092.1	-1.02984	down	K00681	Gamma-glutamyltranspeptidase 3 OS=Arabidopsis thaliana GN=GGT3 PE=2 SV=1	hypothetical protein PRUPE_ppa002923mg [Prunus persica]
Cyanoamino acid metabolism	ko00460	8	55	gi_351598627_gb_JP453142.1	-2.73058	down	K05350	Beta-glucosidase 44 OS=Arabidopsis thaliana GN=BGLU44 PE=2 SV=1	hypothetical protein PRUPE_ppa004380mg [Prunus persica]
Cyanoamino acid metabolism	ko00460	8	55	gi_351599392_gb_JP453888.1	-4.60157	down	K08248	(R)-mandelonitrile lyase 1 OS=Prunus serotina GN=MDL1 PE=1 SV=1	hypothetical protein PRUPE_ppa015533mg, partial [Prunus persica]
Cyanoamino acid metabolism	ko00460	8	55	gi_351600928_gb_JP455385.1	-4.29546	down	K08248	(R)-mandelonitrile lyase 1 OS=Prunus serotina GN=MDL1 PE=1 SV=1	hypothetical protein PRUPE_ppa015533mg, partial [Prunus persica]
Cyanoamino acid metabolism	ko00460	8	55	gi_351622792_gb_JP477093.1	-4.38667	down	K08248	(R)-mandelonitrile lyase 1 OS=Prunus serotina GN=MDL1 PE=1 SV=1	PREDICTED: LOW QUALITY PROTEIN: (R)-mandelonitrile lyase 2-like [Fragaria vesca subsp. vesca]
Cyanoamino acid metabolism	ko00460	8	55	gi_351624507_gb_JP478808.1	-1.37365	down	K13034	L-3-cyanoalanine synthase 1, mitochondrial OS=Malus domestica GN=CAS1 PE=1 SV=1	PREDICTED: l-3-cyanoalanine synthase 2, mitochondrial-like isoform 1 [Cucumis sativus]
Phenylalanine metabolism	ko00360	8	108	gi_351590887_gb_JP449345.1	-1.9778	down	K00430	Peroxidase 12 OS=Arabidopsis thaliana GN=PER12 PE=1 SV=1	hypothetical protein PRUPE_ppa007748mg [Prunus persica]
Phenylalanine metabolism	ko00360	8	108	gi_351595740_gb_JP450305.1	-1.26734	down	K00430	Peroxidase 4 OS=Vitis vinifera GN=GSVIVT00023967001 PE=1 SV=1	Peroxidase superfamily protein [Theobroma cacao]
Phenylalanine metabolism	ko00360	8	108	gi_351596930_gb_JP451483.1	1.64952	up	K00430	Peroxidase 47 OS=Arabidopsis thaliana GN=PER47 PE=2 SV=2	Peroxidase 47 precursor, putative [Ricinus communis]
Phenylalanine metabolism	ko00360	8	108	gi_351600324_gb_JP454795.1	-4.30979	down	K00430	Peroxidase 27 OS=Arabidopsis thaliana GN=PER27 PE=1 SV=1	hypothetical protein PRUPE_ppa023088mg [Prunus persica]
Phenylalanine metabolism	ko00360	8	108	gi_351605939_gb_JP460278.1	-3.01408	down	K00430	Peroxidase 53 OS=Arabidopsis thaliana GN=PER53 PE=1 SV=1	hypothetical protein PRUPE_ppa008390mg [Prunus persica]
Phenylalanine metabolism	ko00360	8	108	gi_351613177_gb_JP467478.1	-2.08474	down	K00430	Peroxidase 3 OS=Arabidopsis thaliana GN=PER3 PE=2 SV=1	hypothetical protein PRUPE_ppa008540mg [Prunus persica]
Phenylalanine metabolism	ko00360	8	108	gi_351623829_gb_JP478130.1	-2.90905	down	K00430	Peroxidase 72 OS=Arabidopsis thaliana GN=PER72 PE=1 SV=1	predicted protein [Populus trichocarpa]
Phenylalanine metabolism	ko00360	8	108	gi_351625374_gb_JP479675.1	-1.36816	down	K00430	Peroxidase 17 OS=Arabidopsis thaliana GN=PER17 PE=2 SV=1	PREDICTED: peroxidase 17-like [Fragaria vesca subsp. vesca]
Inositol phosphate metabolism	ko00562	6	74	gi_351597300_gb_JP451848.1	-1.48469	down	K05857	Phosphoinositide phospholipase C 4 OS=Arabidopsis thaliana GN=PLC4 PE=2 SV=2	Phosphatidylinositol-speciwc phospholipase C4 [Theobroma cacao]
Inositol phosphate metabolism	ko00562	6	74	gi_351603727_gb_JP458083.1	1.31073	up	K01858	Inositol-3-phosphate synthase OS=Sesamum indicum PE=2 SV=1	myo-inositol-1 phosphate synthase, putative [Ricinus communis]
Inositol phosphate metabolism	ko00562	6	74	gi_351608706_gb_JP463010.1	3.22762	up	K00888	Phosphatidylinositol 4-kinase alpha OS=Arabidopsis thaliana GN=PI4KALPHA1 PE=1 SV=2	predicted protein [Populus trichocarpa]
Inositol phosphate metabolism	ko00562	6	74	gi_351618626_gb_JP472927.1	2.21942	up	K00469	Probable inositol oxygenase OS=Oryza sativa subsp. japonica GN=Os06g0561000 PE=2 SV=1	PREDICTED: inositol oxygenase 1-like [Fragaria vesca subsp. vesca]
Inositol phosphate metabolism	ko00562	6	74	gi_351622864_gb_JP477165.1	4.09572	up	K00469	Inositol oxygenase 1 OS=Arabidopsis thaliana GN=MIOX1 PE=2 SV=1	Myo-inositol oxygenase 1 isoform 1 [Theobroma cacao]
Inositol phosphate metabolism	ko00562	6	74	gi_351623544_gb_JP477845.1	1.81077	up	K00888	Phosphatidylinositol 4-kinase alpha OS=Arabidopsis thaliana GN=PI4KALPHA1 PE=1 SV=2	hypothetical protein PRUPE_ppa000062mg [Prunus persica]
Nitrogen metabolism	ko00910	6	66	gi_351596259_gb_JP450816.1	-1.44453	down	K01915	Glutamine synthetase leaf isozyme, chloroplastic OS=Phaseolus vulgaris PE=1 SV=1	hypothetical protein PRUPE_ppa006025mg [Prunus persica]
Nitrogen metabolism	ko00910	6	66	gi_351598272_gb_JP452798.1	-1.54791	down	K00605	Aminomethyltransferase, mitochondrial OS=Flaveria trinervia GN=GDCST PE=3 SV=1	PREDICTED: aminomethyltransferase, mitochondrial-like [Fragaria vesca subsp. vesca]
Nitrogen metabolism	ko00910	6	66	gi_351612051_gb_JP466352.1	-2.04752	down	K01673	--	Carbonic anhydrase 2, CA2 isoform 1 [Theobroma cacao]
Nitrogen metabolism	ko00910	6	66	gi_351615730_gb_JP470031.1	-2.45565	down	K01673	Carbonic anhydrase, chloroplastic OS=Pisum sativum PE=1 SV=1	PREDICTED: carbonic anhydrase, chloroplastic [Glycine max]
Nitrogen metabolism	ko00910	6	66	gi_351617853_gb_JP472154.1	-1.19039	down	K01673	Carbonic anhydrase, chloroplastic OS=Nicotiana tabacum PE=2 SV=1	carbonic anhydrase, putative [Ricinus communis]
Nitrogen metabolism	ko00910	6	66	gi_351621906_gb_JP476207.1	-3.04235	down	K01674	Bifunctional monodehydroascorbate reductase and carbonic anhydrase nectarin-3 OS=Nicotiana langsdorffii x Nicotiana sanderae GN=NEC3 PE=1 SV=1	PREDICTED: bifunctional monodehydroascorbate reductase and carbonic anhydrase nectarin-3-like [Fragaria vesca subsp. vesca]
Pentose and glucuronate interconversions	ko00040	5	54	gi_351612153_gb_JP466454.1	-3.90393	down	K01728	Probable pectate lyase 15 OS=Arabidopsis thaliana GN=At4g13710 PE=2 SV=1	PREDICTED: probable pectate lyase 15-like [Fragaria vesca subsp. vesca]
Pentose and glucuronate interconversions	ko00040	5	54	gi_351619771_gb_JP474072.1	-2.98363	down	K01728	Probable pectate lyase 12 OS=Arabidopsis thaliana GN=At3g53190 PE=2 SV=2	hypothetical protein PRUPE_ppa004881mg [Prunus persica]
Pentose and glucuronate interconversions	ko00040	5	54	gi_351621890_gb_JP476191.1	-2.99689	down	K01728	Probable pectate lyase 12 OS=Arabidopsis thaliana GN=At3g53190 PE=2 SV=2	hypothetical protein PRUPE_ppa003600mg [Prunus persica]
Pentose and glucuronate interconversions	ko00040	5	54	gi_351625213_gb_JP479514.1	-1.60396	down	K01051	Probable pectinesterase/pectinesterase inhibitor 39 OS=Arabidopsis thaliana GN=PME39 PE=2 SV=1	hypothetical protein PRUPE_ppa003400mg [Prunus persica]
Pentose and glucuronate interconversions	ko00040	5	54	gi_351625714_gb_JP480015.1	-1.16746	down	K01051	Pectinesterase/pectinesterase inhibitor OS=Ficus pumila var. awkeotsang PE=1 SV=1	hypothetical protein PRUPE_ppa003697mg [Prunus persica]
Ascorbate and aldarate metabolism	ko00053	5	45	gi_351604597_gb_JP458947.1	2.33253	up	K00434	L-ascorbate peroxidase 2, cytosolic OS=Arabidopsis thaliana GN=APX2 PE=2 SV=3	cytosolic ascorbate peroxidase [Vitis vinifera]
Ascorbate and aldarate metabolism	ko00053	5	45	gi_351618626_gb_JP472927.1	2.21942	up	K00469	Probable inositol oxygenase OS=Oryza sativa subsp. japonica GN=Os06g0561000 PE=2 SV=1	PREDICTED: inositol oxygenase 1-like [Fragaria vesca subsp. vesca]
Ascorbate and aldarate metabolism	ko00053	5	45	gi_351622676_gb_JP476977.1	1.71012	up	K14085	Aldehyde dehydrogenase family 7 member A1 OS=Malus domestica PE=1 SV=3	hypothetical protein PRUPE_ppa004461mg [Prunus persica]
Ascorbate and aldarate metabolism	ko00053	5	45	gi_351622864_gb_JP477165.1	4.09572	up	K00469	Inositol oxygenase 1 OS=Arabidopsis thaliana GN=MIOX1 PE=2 SV=1	Myo-inositol oxygenase 1 isoform 1 [Theobroma cacao]
Ascorbate and aldarate metabolism	ko00053	5	45	gi_351623279_gb_JP477580.1	-1.14339	down	K00434	Thylakoid lumenal 29 kDa protein, chloroplastic OS=Solanum lycopersicum GN=CLEB3J9 PE=3 SV=1	unnamed protein product [Vitis vinifera]
Photosynthesis - antenna proteins	ko00196	4	25	gi_351597076_gb_JP451628.1	-1.45818	down	K08916	Chlorophyll a-b binding protein CP26, chloroplastic OS=Arabidopsis thaliana GN=LHCB5 PE=2 SV=1	light-harvesting complex II protein Lhcb5 [Populus trichocarpa]
Photosynthesis - antenna proteins	ko00196	4	25	gi_351597152_gb_JP451702.1	-1.70755	down	K08914	Chlorophyll a-b binding protein 13, chloroplastic OS=Solanum lycopersicum GN=CAB13 PE=1 SV=1	hypothetical protein PRUPE_ppa009987mg [Prunus persica]
Photosynthesis - antenna proteins	ko00196	4	25	gi_351612408_gb_JP466709.1	-1.8441	down	K08915	Chlorophyll a-b binding protein CP29.3, chloroplastic OS=Arabidopsis thaliana GN=LHCB4.3 PE=1 SV=1	hypothetical protein PRUPE_ppa009686mg [Prunus persica]
Photosynthesis - antenna proteins	ko00196	4	25	gi_351627296_gb_JP480179.1	-2.71829	down	K08912	Chlorophyll a-b binding protein, chloroplastic OS=Spinacia oleracea PE=1 SV=1	putative chloroplast chlorophyll a/b-binding protein [Carya cathayensis]

## Sheet: DEGs.KEGG
#KEGG_n	158	KEGG_N	4540
#Pathway	ko_ID	Unigene	gene	Unigene_all	gene_all	Genes	KEGG ID
Plant hormone signal transduction	ko04075	15	199	158	4540	gi_351591074_gb_JP449530.1;gi_351600776_gb_JP455237.1;gi_351603881_gb_JP458236.1;gi_351607005_gb_JP461329.1;gi_351612001_gb_JP466302.1;gi_351615261_gb_JP469562.1;gi_351617736_gb_JP472037.1;gi_351618741_gb_JP473042.1;gi_351619546_gb_JP473847.1;gi_351620096_gb_JP474397.1;gi_351621532_gb_JP475833.1;gi_351623117_gb_JP477418.1;gi_351623634_gb_JP477935.1;gi_351623983_gb_JP478284.1;gi_351625727_gb_JP480…	K14496+K14497+K13464+K14488+K13946+K14497+K14488+K14497+K14488+K14497+K14431+K14497+K14498+K14497+K14487
Photosynthesis	ko00195	14	62	158	4540	gi_351597439_gb_JP451985.1;gi_351602169_gb_JP456600.1;gi_351604153_gb_JP458507.1;gi_351611422_gb_JP465723.1;gi_351611463_gb_JP465764.1;gi_351611618_gb_JP465919.1;gi_351616251_gb_JP470552.1;gi_351620896_gb_JP475197.1;gi_351621674_gb_JP475975.1;gi_351623166_gb_JP477467.1;gi_351624200_gb_JP478501.1;gi_351629064_gb_JP481947.1;gi_351629185_gb_JP482068.1;gi_351629358_gb_JP482241.1	K08901+K02698+K02716+K02693+K08905+K02723+K02639+K02701+K08903+K02639+K02692+K02113+K02721+K02641
Phenylpropanoid biosynthesis	ko00940	14	132	158	4540	gi_351590887_gb_JP449345.1;gi_351595740_gb_JP450305.1;gi_351596930_gb_JP451483.1;gi_351596945_gb_JP451498.1;gi_351596970_gb_JP451523.1;gi_351598627_gb_JP453142.1;gi_351600324_gb_JP454795.1;gi_351603836_gb_JP458191.1;gi_351605939_gb_JP460278.1;gi_351613177_gb_JP467478.1;gi_351623829_gb_JP478130.1;gi_351625374_gb_JP479675.1;gi_351628557_gb_JP481440.1;gi_351629180_gb_JP482063.1	K00430+K00430+K00430+K01188+K05350+K05350+K00430+K09755+K00430+K00430+K00430+K00430+K13065+K12355
Starch and sucrose metabolism	ko00500	10	170	158	4540	gi_351596945_gb_JP451498.1;gi_351596970_gb_JP451523.1;gi_351597197_gb_JP451747.1;gi_351598627_gb_JP453142.1;gi_351600629_gb_JP455093.1;gi_351606714_gb_JP461040.1;gi_351619498_gb_JP473799.1;gi_351625213_gb_JP479514.1;gi_351625714_gb_JP480015.1;gi_351628462_gb_JP481345.1	K01188+K05350+K01193+K05350+K13648+K01193+K00697+K01051+K01051+K00688
Carbon fixation in photosynthetic organisms	ko00710	9	84	158	4540	gi_351591232_gb_JP449682.1;gi_351596998_gb_JP451550.1;gi_351597687_gb_JP452228.1;gi_351603821_gb_JP458176.1;gi_351616200_gb_JP470501.1;gi_351619565_gb_JP473866.1;gi_351622628_gb_JP476929.1;gi_351623497_gb_JP477798.1;gi_351624080_gb_JP478381.1	K01807+K05298+K05298+K00927+K01602+K01610+K00028+K01623+K01807
Cyanoamino acid metabolism	ko00460	8	55	158	4540	gi_351596945_gb_JP451498.1;gi_351596970_gb_JP451523.1;gi_351597547_gb_JP452092.1;gi_351598627_gb_JP453142.1;gi_351599392_gb_JP453888.1;gi_351600928_gb_JP455385.1;gi_351622792_gb_JP477093.1;gi_351624507_gb_JP478808.1	K01188+K05350+K00681+K05350+K08248+K08248+K08248+K13034
Phenylalanine metabolism	ko00360	8	108	158	4540	gi_351590887_gb_JP449345.1;gi_351595740_gb_JP450305.1;gi_351596930_gb_JP451483.1;gi_351600324_gb_JP454795.1;gi_351605939_gb_JP460278.1;gi_351613177_gb_JP467478.1;gi_351623829_gb_JP478130.1;gi_351625374_gb_JP479675.1	K00430+K00430+K00430+K00430+K00430+K00430+K00430+K00430
Glycolysis / Gluconeogenesis	ko00010	6	145	158	4540	gi_351603821_gb_JP458176.1;gi_351618091_gb_JP472392.1;gi_351619565_gb_JP473866.1;gi_351621912_gb_JP476213.1;gi_351622676_gb_JP476977.1;gi_351623497_gb_JP477798.1	K00927+K01792+K01610+K00001+K14085+K01623
Inositol phosphate metabolism	ko00562	6	74	158	4540	gi_351597300_gb_JP451848.1;gi_351603727_gb_JP458083.1;gi_351608706_gb_JP463010.1;gi_351618626_gb_JP472927.1;gi_351622864_gb_JP477165.1;gi_351623544_gb_JP477845.1	K05857+K01858+K00888+K00469+K00469+K00888
Plant-pathogen interaction	ko04626	6	118	158	4540	gi_351600024_gb_JP454501.1;gi_351603881_gb_JP458236.1;gi_351606916_gb_JP461241.1;gi_351614393_gb_JP468694.1;gi_351624577_gb_JP478878.1;gi_351627543_gb_JP480426.1	K13412+K13464+K13424+K13448+K04079+K13412
Glutathione metabolism	ko00480	6	85	158	4540	gi_351597547_gb_JP452092.1;gi_351598447_gb_JP452970.1;gi_351601493_gb_JP455938.1;gi_351604597_gb_JP458947.1;gi_351623279_gb_JP477580.1;gi_351627314_gb_JP480197.1	K00681+K00799+K00799+K00434+K00434+K00799
Nitrogen metabolism	ko00910	6	66	158	4540	gi_351596259_gb_JP450816.1;gi_351598272_gb_JP452798.1;gi_351612051_gb_JP466352.1;gi_351615730_gb_JP470031.1;gi_351617853_gb_JP472154.1;gi_351621906_gb_JP476207.1	K01915+K00605+K01673+K01673+K01673+K01674
Pentose and glucuronate interconversions	ko00040	5	54	158	4540	gi_351612153_gb_JP466454.1;gi_351619771_gb_JP474072.1;gi_351621890_gb_JP476191.1;gi_351625213_gb_JP479514.1;gi_351625714_gb_JP480015.1	K01728+K01728+K01728+K01051+K01051
Protein processing in endoplasmic reticulum	ko04141	5	185	158	4540	gi_351599305_gb_JP453802.1;gi_351619295_gb_JP473596.1;gi_351620887_gb_JP475188.1;gi_351624577_gb_JP478878.1;gi_351625728_gb_JP480029.1	K03283+K13993+K13993+K04079+K03283
Galactose metabolism	ko00052	5	62	158	4540	gi_351597197_gb_JP451747.1;gi_351598233_gb_JP452761.1;gi_351603859_gb_JP458214.1;gi_351606714_gb_JP461040.1;gi_351621474_gb_JP475775.1	K01193+K07407+K01784+K01193+K06611
Ascorbate and aldarate metabolism	ko00053	5	45	158	4540	gi_351604597_gb_JP458947.1;gi_351618626_gb_JP472927.1;gi_351622676_gb_JP476977.1;gi_351622864_gb_JP477165.1;gi_351623279_gb_JP477580.1	K00434+K00469+K14085+K00469+K00434
Biosynthesis of unsaturated fatty acids	ko01040	5	62	158	4540	gi_351597536_gb_JP452081.1;gi_351605559_gb_JP459903.1;gi_351612036_gb_JP466337.1;gi_351617530_gb_JP471831.1;gi_351618895_gb_JP473196.1	K10257+K10257+K10256+K10256+K00507
Pyruvate metabolism	ko00620	5	107	158	4540	gi_351598609_gb_JP453124.1;gi_351609227_gb_JP463528.1;gi_351619565_gb_JP473866.1;gi_351622628_gb_JP476929.1;gi_351622676_gb_JP476977.1	K01759+K01069+K01610+K00028+K14085
Oxidative phosphorylation	ko00190	5	203	158	4540	gi_351596344_gb_JP450901.1;gi_351603123_gb_JP457482.1;gi_351617925_gb_JP472226.1;gi_351621914_gb_JP476215.1;gi_351629064_gb_JP481947.1	K01535+K01535+K01535+K03937+K02113
Spliceosome	ko03040	5	204	158	4540	gi_351591159_gb_JP449615.1;gi_351599305_gb_JP453802.1;gi_351600128_gb_JP454604.1;gi_351618765_gb_JP473066.1;gi_351625728_gb_JP480029.1	K12819+K03283+K12872+K12819+K03283
Cysteine and methionine metabolism	ko00270	5	108	158	4540	gi_351596872_gb_JP451425.1;gi_351600120_gb_JP454596.1;gi_351603784_gb_JP458140.1;gi_351624507_gb_JP478808.1;gi_351625691_gb_JP479992.1	K01738+K00547+K01761+K13034+K00547
Purine metabolism	ko00230	4	180	158	4540	gi_351600143_gb_JP454619.1;gi_351601855_gb_JP456293.1;gi_351618216_gb_JP472517.1;gi_351624448_gb_JP478749.1	K14641+K14641+K00939+K01466
Pyrimidine metabolism	ko00240	4	147	158	4540	gi_351596125_gb_JP450683.1;gi_351598599_gb_JP453114.1;gi_351600143_gb_JP454619.1;gi_351601855_gb_JP456293.1	K01465+K01937+K14641+K14641
Terpenoid backbone biosynthesis	ko00900	4	48	158	4540	gi_351596822_gb_JP451376.1;gi_351612464_gb_JP466765.1;gi_351615106_gb_JP469407.1;gi_351627984_gb_JP480867.1	K01662+K00099+K00099+K00021
Glycerolipid metabolism	ko00561	4	58	158	4540	gi_351598087_gb_JP452620.1;gi_351598233_gb_JP452761.1;gi_351622627_gb_JP476928.1;gi_351622676_gb_JP476977.1	K13508+K07407+K03715+K14085
Photosynthesis - antenna proteins	ko00196	4	25	158	4540	gi_351597076_gb_JP451628.1;gi_351597152_gb_JP451702.1;gi_351612408_gb_JP466709.1;gi_351627296_gb_JP480179.1	K08916+K08914+K08915+K08912
Arginine and proline metabolism	ko00330	4	90	158	4540	gi_351596259_gb_JP450816.1;gi_351622676_gb_JP476977.1;gi_351624708_gb_JP479009.1;gi_351627478_gb_JP480361.1	K01915+K14085+K12657+K12657
Glycine, serine and threonine metabolism	ko00260	3	46	158	4540	gi_351598272_gb_JP452798.1;gi_351605640_gb_JP459984.1;gi_351622676_gb_JP476977.1	K00605+K01620+K14085
Amino sugar and nucleotide sugar metabolism	ko00520	3	125	158	4540	gi_351600629_gb_JP455093.1;gi_351603859_gb_JP458214.1;gi_351619807_gb_JP474108.1	K13648+K01784+K12373
Pentose phosphate pathway	ko00030	3	69	158	4540	gi_351591232_gb_JP449682.1;gi_351623497_gb_JP477798.1;gi_351624080_gb_JP478381.1	K01807+K01623+K01807
Phosphatidylinositol signaling system	ko04070	3	71	158	4540	gi_351597300_gb_JP451848.1;gi_351608706_gb_JP463010.1;gi_351623544_gb_JP477845.1	K05857+K00888+K00888
Steroid biosynthesis	ko00100	3	25	158	4540	gi_351601888_gb_JP456325.1;gi_351624450_gb_JP478751.1;gi_351629092_gb_JP481975.1	K00559+K00511+K00511
Sulfur metabolism	ko00920	2	45	158	4540	gi_351596872_gb_JP451425.1;gi_351624507_gb_JP478808.1	K01738+K13034
Alanine, aspartate and glutamate metabolism	ko00250	2	83	158	4540	gi_351596259_gb_JP450816.1;gi_351599480_gb_JP453973.1	K01915+K01580
Fatty acid metabolism	ko00071	2	51	158	4540	gi_351621912_gb_JP476213.1;gi_351622676_gb_JP476977.1	K00001+K14085
Butanoate metabolism	ko00650	2	32	158	4540	gi_351599480_gb_JP453973.1;gi_351624042_gb_JP478343.1	K01580+K01653
beta-Alanine metabolism	ko00410	2	51	158	4540	gi_351599480_gb_JP453973.1;gi_351622676_gb_JP476977.1	K01580+K14085
Lysine degradation	ko00310	2	24	158	4540	gi_351622676_gb_JP476977.1;gi_351628177_gb_JP481060.1	K14085+K14157
Taurine and hypotaurine metabolism	ko00430	2	21	158	4540	gi_351597547_gb_JP452092.1;gi_351599480_gb_JP453973.1	K00681+K01580
Sphingolipid metabolism	ko00600	2	29	158	4540	gi_351598233_gb_JP452761.1;gi_351627884_gb_JP480767.1	K07407+K12349
Glycosphingolipid biosynthesis - globo series	ko00603	2	17	158	4540	gi_351598233_gb_JP452761.1;gi_351619807_gb_JP474108.1	K07407+K12373
Selenocompound metabolism	ko00450	2	21	158	4540	gi_351603784_gb_JP458140.1;gi_351628195_gb_JP481078.1	K01761+K01874
Endocytosis	ko04144	2	92	158	4540	gi_351599305_gb_JP453802.1;gi_351625728_gb_JP480029.1	K03283+K03283
Lysine biosynthesis	ko00300	2	23	158	4540	gi_351622676_gb_JP476977.1;gi_351628177_gb_JP481060.1	K14085+K14157
Mismatch repair	ko03430	2	57	158	4540	gi_351606971_gb_JP461295.1;gi_351617604_gb_JP471905.1	K10746+K08734
Valine, leucine and isoleucine biosynthesis	ko00290	1	47	158	4540	gi_351624042_gb_JP478343.1	K01653
Glycosphingolipid biosynthesis - ganglio series	ko00604	1	9	158	4540	gi_351619807_gb_JP474108.1	K12373
Thiamine metabolism	ko00730	1	9	158	4540	gi_351598856_gb_JP453364.1	K03147
Glycerophospholipid metabolism	ko00564	1	72	158	4540	gi_351598087_gb_JP452620.1	K13508
Other glycan degradation	ko00511	1	21	158	4540	gi_351619807_gb_JP474108.1	K12373
Phagosome	ko04145	1	95	158	4540	gi_351613155_gb_JP467456.1	K04392
C5-Branched dibasic acid metabolism	ko00660	1	6	158	4540	gi_351624042_gb_JP478343.1	K01653
Carotenoid biosynthesis	ko00906	1	43	158	4540	gi_351624575_gb_JP478876.1	K09838
Arachidonic acid metabolism	ko00590	1	18	158	4540	gi_351597547_gb_JP452092.1	K00681
Pantothenate and CoA biosynthesis	ko00770	1	30	158	4540	gi_351624042_gb_JP478343.1	K01653
Peroxisome	ko04146	1	93	158	4540	gi_351620751_gb_JP475052.1	K13356
Basal transcription factors	ko03022	1	46	158	4540	gi_351622440_gb_JP476741.1	K03126
Citrate cycle (TCA cycle)	ko00020	1	78	158	4540	gi_351619565_gb_JP473866.1	K01610
Diterpenoid biosynthesis	ko00904	1	14	158	4540	gi_351624761_gb_JP479062.1	K04123
Stilbenoid, diarylheptanoid and gingerol biosynthesis	ko00945	1	29	158	4540	gi_351628557_gb_JP481440.1	K13065
Brassinosteroid biosynthesis	ko00905	1	7	158	4540	gi_351607809_gb_JP462124.1	K09587
Glycosaminoglycan degradation	ko00531	1	25	158	4540	gi_351619807_gb_JP474108.1	K12373
Ribosome biogenesis in eukaryotes	ko03008	1	132	158	4540	gi_351603518_gb_JP457876.1	K14536
ABC transporters	ko02010	1	10	158	4540	gi_351628661_gb_JP481544.1	K05658
Flavonoid biosynthesis	ko00941	1	51	158	4540	gi_351628557_gb_JP481440.1	K13065
Valine, leucine and isoleucine degradation	ko00280	1	67	158	4540	gi_351622676_gb_JP476977.1	K14085
Ubiquinone and other terpenoid-quinone biosynthesis	ko00130	1	53	158	4540	gi_351623568_gb_JP477869.1	K05928
Fructose and mannose metabolism	ko00051	1	54	158	4540	gi_351623497_gb_JP477798.1	K01623
Glyoxylate and dicarboxylate metabolism	ko00630	1	41	158	4540	gi_351616200_gb_JP470501.1	K01602
Propanoate metabolism	ko00640	1	57	158	4540	gi_351622676_gb_JP476977.1	K14085
Tryptophan metabolism	ko00380	1	39	158	4540	gi_351622676_gb_JP476977.1	K14085
One carbon pool by folate	ko00670	1	21	158	4540	gi_351598272_gb_JP452798.1	K00605
Zeatin biosynthesis	ko00908	1	34	158	4540	gi_351599500_gb_JP453993.1	K13495
Aminoacyl-tRNA biosynthesis	ko00970	1	87	158	4540	gi_351628195_gb_JP481078.1	K01874
Natural killer cell mediated cytotoxicity	ko04650	1	20	158	4540	gi_351613155_gb_JP467456.1	K04392
Tyrosine metabolism	ko00350	1	71	158	4540	gi_351621912_gb_JP476213.1	K00001
Histidine metabolism	ko00340	1	35	158	4540	gi_351622676_gb_JP476977.1	K14085
