# Supplementary material for: Genome-Wide Expression Profiles of Hemp (Cannabis sativa L.) in Response to Drought Stress
Source: Int J Genomics. 2018 May 15;2018:3057272. doi: 10.1155/2018/3057272 (PMC5976996; doi:10.1155/2018/3057272)
Supplement: Supplementary 6 — Table S5: GO terms responding to drought stress. [file 3057272.f6.xls]

## Sheet: BP
#Gene_Ontology_term	Cluter_frequency	Genome_frequency	P-value
Biological Process: divalent metal ion transport (GO:0070838);	32 out of 1011 3.16518298714144%	177 out of 23596 0.750127140193253%	7.13629e-09
Biological Process: response to arsenic-containing substance (GO:0046685);	29 out of 1011 2.86844708209693%	173 out of 23596 0.733175114426174%	5.36246e-07
Biological Process: response to cold (GO:0009409);	92 out of 1011 9.09990108803165%	1104 out of 23596 4.67875911171385%	1.33554e-06
Biological Process: polysaccharide biosynthetic process (GO:0000271);	39 out of 1011 3.85756676557863%	301 out of 23596 1.27563993897271%	1.45236e-06
Biological Process: response to blue light (GO:0009637);	32 out of 1011 3.16518298714144%	224 out of 23596 0.949313442956433%	4.28087e-06
Biological Process: cellular cation homeostasis (GO:0030003);	37 out of 1011 3.65974282888229%	291 out of 23596 1.23325987455501%	6.62385e-06
Biological Process: cell wall modification involved in multidimensional cell growth (GO:0042547);	10 out of 1011 0.989119683481701%	21 out of 23596 0.0889981352771656%	8.43937e-06
Biological Process: photosynthetic electron transport in photosystem I (GO:0009773);	16 out of 1011 1.58259149357072%	62 out of 23596 0.262756399389727%	9.04192e-06
Biological Process: pattern specification process (GO:0007389);	36 out of 1011 3.56083086053412%	298 out of 23596 1.2629259196474%	4.15585e-05
Biological Process: defense response (GO:0006952);	80 out of 1011 7.91295746785361%	991 out of 23596 4.19986438379386%	7.34203e-05
Biological Process: response to karrikin (GO:0080167);	47 out of 1011 4.648862512364%	475 out of 23596 2.01305305984065%	0.000178277
Biological Process: response to water deprivation (GO:0009414);	94 out of 1011 9.29772502472799%	1259 out of 23596 5.33565011018817%	0.000191178
Biological Process: cell tip growth (GO:0009932);	36 out of 1011 3.56083086053412%	322 out of 23596 1.36463807424987%	0.00029902
Biological Process: heat acclimation (GO:0010286);	27 out of 1011 2.67062314540059%	202 out of 23596 0.856077301237498%	0.000304059
Biological Process: regulation of cell size (GO:0008361);	29 out of 1011 2.86844708209693%	231 out of 23596 0.978979488048822%	0.000420209
Biological Process: cellular component organization (GO:0016043);	59 out of 1011 5.83580613254204%	685 out of 23596 2.90303441261231%	0.000567459
Biological Process: response to high light intensity (GO:0009644);	42 out of 1011 4.15430267062315%	430 out of 23596 1.82234276996101%	0.00120279
Biological Process: regulation of meristem growth (GO:0010075);	49 out of 1011 4.84668644906034%	541 out of 23596 2.29276148499746%	0.00136671
Biological Process: pentose-phosphate shunt (GO:0006098);	36 out of 1011 3.56083086053412%	346 out of 23596 1.46635022885235%	0.00171892
Biological Process: plant-type cell wall organization (GO:0009664);	48 out of 1011 4.74777448071217%	534 out of 23596 2.26309543990507%	0.0021971
Biological Process: cellular response to stimulus (GO:0051716);	38 out of 1011 3.75865479723046%	382 out of 23596 1.61891846075606%	0.00261412
Biological Process: multidimensional cell growth (GO:0009825);	38 out of 1011 3.75865479723046%	392 out of 23596 1.66129852517376%	0.00486765
Biological Process: response to desiccation (GO:0009269);	22 out of 1011 2.17606330365974%	168 out of 23596 0.711985082217325%	0.00585431
Biological Process: root hair elongation (GO:0048767);	53 out of 1011 5.24233432245302%	646 out of 23596 2.73775216138329%	0.00946999
Biological Process: hydrogen peroxide catabolic process (GO:0042744);	25 out of 1011 2.47279920870425%	218 out of 23596 0.923885404305815%	0.0144539
Biological Process: anthocyanin accumulation in tissues in response to UV light (GO:0043481);	34 out of 1011 3.36300692383778%	349 out of 23596 1.47906424817766%	0.0145029
Biological Process: syncytium formation (GO:0006949);	9 out of 1011 0.890207715133531%	34 out of 23596 0.144092219020173%	0.0172524
Biological Process: hyperosmotic salinity response (GO:0042538);	55 out of 1011 5.44015825914936%	700 out of 23596 2.96660450923885%	0.0221648
Biological Process: flavonoid biosynthetic process (GO:0009813);	29 out of 1011 2.86844708209693%	284 out of 23596 1.20359382946262%	0.0274349
Biological Process: photoinhibition (GO:0010205);	8 out of 1011 0.791295746785361%	28 out of 23596 0.118664180369554%	0.0294522
Biological Process: oxidation-reduction process (GO:0055114);	120 out of 1011 11.8694362017804%	1932 out of 23596 8.18782844549924%	0.0406364
Biological Process: regulation of stomatal movement (GO:0010119);	29 out of 1011 2.86844708209693%	290 out of 23596 1.22902186811324%	0.0406505
Biological Process: cysteine biosynthetic process (GO:0019344);	36 out of 1011 3.56083086053412%	399 out of 23596 1.69096457026615%	0.0428625
Biological Process: response to copper ion (GO:0046688);	13 out of 1011 1.28585558852621%	78 out of 23596 0.330564502458044%	0.0465109
Biological Process: cell wall macromolecule metabolic process (GO:0044036);	20 out of 1011 1.9782393669634%	165 out of 23596 0.699271062892016%	0.0512051
Biological Process: regulation of protein dephosphorylation (GO:0035304);	29 out of 1011 2.86844708209693%	294 out of 23596 1.24597389388032%	0.0524321
Biological Process: thalianol metabolic process (GO:0080003);	7 out of 1011 0.692383778437191%	23 out of 23596 0.0974741481607052%	0.0642175
Biological Process: proline biosynthetic process (GO:0006561);	8 out of 1011 0.791295746785361%	32 out of 23596 0.135616206136633%	0.0855753
Biological Process: L-fucose biosynthetic process (GO:0006005);	4 out of 1011 0.395647873392681%	6 out of 23596 0.0254280386506187%	0.0865192
Biological Process: cellulose catabolic process (GO:0030245);	6 out of 1011 0.593471810089021%	17 out of 23596 0.0720461095100865%	0.0926525
Biological Process: response to hormone stimulus (GO:0009725);	31 out of 1011 3.06627101879327%	335 out of 23596 1.41973215799288%	0.096461
Biological Process: plant-type cell wall loosening (GO:0009828);	7 out of 1011 0.692383778437191%	25 out of 23596 0.105950161044245%	0.116803
Biological Process: auxin polar transport (GO:0009926);	25 out of 1011 2.47279920870425%	247 out of 23596 1.04678759111714%	0.120164
Biological Process: defense response to fungus (GO:0050832);	76 out of 1011 7.51730959446093%	1132 out of 23596 4.7974232920834%	0.133093
Biological Process: secondary cell wall biogenesis (GO:0009834);	19 out of 1011 1.87932739861523%	166 out of 23596 0.703509069333785%	0.176302
Biological Process: response to heat (GO:0009408);	44 out of 1011 4.35212660731949%	564 out of 23596 2.39023563315816%	0.190366
Biological Process: regulation of proton transport (GO:0010155);	17 out of 1011 1.68150346191889%	141 out of 23596 0.597558908289541%	0.213473
Biological Process: response to red light (GO:0010114);	24 out of 1011 2.37388724035608%	243 out of 23596 1.02983556535006%	0.243964
Biological Process: drug transport (GO:0015893);	10 out of 1011 0.989119683481701%	57 out of 23596 0.241566367180878%	0.254039
Biological Process: defense response to Gram-negative bacterium (GO:0050829);	5 out of 1011 0.494559841740851%	13 out of 23596 0.0550940837430073%	0.254549
Biological Process: tricyclic triterpenoid biosynthetic process (GO:0010263);	5 out of 1011 0.494559841740851%	13 out of 23596 0.0550940837430073%	0.254549
Biological Process: starch biosynthetic process (GO:0019252);	34 out of 1011 3.36300692383778%	403 out of 23596 1.70791659603323%	0.266711
Biological Process: response to other organism (GO:0051707);	35 out of 1011 3.46191889218595%	422 out of 23596 1.78843871842685%	0.298629
Biological Process: response to oxidative stress (GO:0006979);	46 out of 1011 4.54995054401583%	611 out of 23596 2.58942193592134%	0.304843
Biological Process: regulation of hormone levels (GO:0010817);	25 out of 1011 2.47279920870425%	262 out of 23596 1.11035768774369%	0.307612
Biological Process: cellular glucan metabolic process (GO:0006073);	11 out of 1011 1.08803165182987%	71 out of 23596 0.300898457365655%	0.378695
Biological Process: response to biotic stimulus (GO:0009607);	9 out of 1011 0.890207715133531%	49 out of 23596 0.20766231564672%	0.379483
Biological Process: photosynthesis, light reaction (GO:0019684);	21 out of 1011 2.07715133531157%	206 out of 23596 0.873029327004577%	0.405848
Biological Process: carbohydrate metabolic process (GO:0005975);	36 out of 1011 3.56083086053412%	447 out of 23596 1.8943888794711%	0.429745
Biological Process: response to nematode (GO:0009624);	32 out of 1011 3.16518298714144%	382 out of 23596 1.61891846075606%	0.468848
Biological Process: response to jasmonic acid stimulus (GO:0009753);	46 out of 1011 4.54995054401583%	624 out of 23596 2.64451601966435%	0.488779
Biological Process: response to fructose stimulus (GO:0009750);	36 out of 1011 3.56083086053412%	451 out of 23596 1.91134090523818%	0.509614
Biological Process: phenylpropanoid biosynthetic process (GO:0009699);	10 out of 1011 0.989119683481701%	62 out of 23596 0.262756399389727%	0.521332
Biological Process: response to ethanol (GO:0045471);	8 out of 1011 0.791295746785361%	41 out of 23596 0.173758264112561%	0.552293
Biological Process: photosynthesis (GO:0015979);	15 out of 1011 1.48367952522255%	125 out of 23596 0.529750805221224%	0.555753
Biological Process: response to nitrate (GO:0010167);	45 out of 1011 4.45103857566766%	610 out of 23596 2.58518392947957%	0.558772
Biological Process: NADH dehydrogenase complex (plastoquinone) assembly (GO:0010258);	3 out of 1011 0.29673590504451%	4 out of 23596 0.0169520257670792%	0.560294
Biological Process: response to far red light (GO:0010218);	23 out of 1011 2.27497527200791%	248 out of 23596 1.05102559755891%	0.826889
Biological Process: positive regulation of catalytic activity (GO:0043085);	22 out of 1011 2.17606330365974%	233 out of 23596 0.987455500932361%	0.853515
Biological Process: regulation of multicellular organismal development (GO:2000026);	17 out of 1011 1.68150346191889%	159 out of 23596 0.673843024241397%	0.903024
Biological Process: cell wall organization or biogenesis (GO:0071554);	15 out of 1011 1.48367952522255%	131 out of 23596 0.555178843871843%	0.922981
Biological Process: gibberellin metabolic process (GO:0009685);	5 out of 1011 0.494559841740851%	17 out of 23596 0.0720461095100865%	1
Biological Process: positive regulation of seed germination (GO:0010030);	11 out of 1011 1.08803165182987%	81 out of 23596 0.343278521783353%	1
Biological Process: response to symbiotic fungus (GO:0009610);	12 out of 1011 1.18694362017804%	94 out of 23596 0.39837260552636%	1
Biological Process: photosystem II assembly (GO:0010207);	25 out of 1011 2.47279920870425%	288 out of 23596 1.2205458552297%	1
Biological Process: defense response to bacterium (GO:0042742);	78 out of 1011 7.71513353115727%	1260 out of 23596 5.33988811662994%	1
Biological Process: sterol biosynthetic process (GO:0016126);	35 out of 1011 3.46191889218595%	457 out of 23596 1.93676894388879%	1
Biological Process: response to wounding (GO:0009611);	79 out of 1011 7.81404549950544%	1284 out of 23596 5.44160027123241%	1
Biological Process: response to virus (GO:0009615);	15 out of 1011 1.48367952522255%	137 out of 23596 0.580606882522461%	1
Biological Process: negative regulation of abscisic acid mediated signaling pathway (GO:0009788);	14 out of 1011 1.38476755687438%	123 out of 23596 0.521274792337684%	1
Biological Process: root morphogenesis (GO:0010015);	17 out of 1011 1.68150346191889%	167 out of 23596 0.707747075775555%	1
Biological Process: L-ascorbic acid biosynthetic process (GO:0019853);	7 out of 1011 0.692383778437191%	37 out of 23596 0.156806238345482%	1
Biological Process: nitrate transport (GO:0015706);	43 out of 1011 4.25321463897132%	608 out of 23596 2.57670791659603%	1
Biological Process: xylem development (GO:0010089);	23 out of 1011 2.27497527200791%	263 out of 23596 1.11459569418546%	1
Biological Process: oxoacid metabolic process (GO:0043436);	6 out of 1011 0.593471810089021%	28 out of 23596 0.118664180369554%	1
Biological Process: regulation of response to red or far red light (GO:2000030);	6 out of 1011 0.593471810089021%	28 out of 23596 0.118664180369554%	1
Biological Process: response to salt stress (GO:0009651);	97 out of 1011 9.5944609297725%	1656 out of 23596 7.01813866757078%	1
Biological Process: response to sucrose stimulus (GO:0009744);	44 out of 1011 4.35212660731949%	629 out of 23596 2.6657060518732%	1
Biological Process: auxin mediated signaling pathway (GO:0009734);	19 out of 1011 1.87932739861523%	204 out of 23596 0.864553314121037%	1
Biological Process: water transport (GO:0006833);	29 out of 1011 2.86844708209693%	373 out of 23596 1.58077640278013%	1
Biological Process: multi-organism process (GO:0051704);	17 out of 1011 1.68150346191889%	177 out of 23596 0.750127140193253%	1
Biological Process: diterpene phytoalexin precursor biosynthetic process pathway (GO:0051504);	4 out of 1011 0.395647873392681%	13 out of 23596 0.0550940837430073%	1
Biological Process: inflorescence development (GO:0010229);	15 out of 1011 1.48367952522255%	148 out of 23596 0.627224953381929%	1
Biological Process: brassinosteroid biosynthetic process (GO:0016132);	30 out of 1011 2.9673590504451%	394 out of 23596 1.6697745380573%	1
Biological Process: glucosinolate biosynthetic process (GO:0019761);	30 out of 1011 2.9673590504451%	395 out of 23596 1.67401254449907%	1
Biological Process: lignin biosynthetic process (GO:0009809);	22 out of 1011 2.17606330365974%	261 out of 23596 1.10611968130192%	1
Biological Process: tetracyclic triterpenoid biosynthetic process (GO:0010686);	5 out of 1011 0.494559841740851%	22 out of 23596 0.0932361417189354%	1
Biological Process: monoterpenoid biosynthetic process (GO:0016099);	9 out of 1011 0.890207715133531%	67 out of 23596 0.283946431598576%	1
Biological Process: pentacyclic triterpenoid biosynthetic process (GO:0019745);	16 out of 1011 1.58259149357072%	167 out of 23596 0.707747075775555%	1
Biological Process: killing of cells of other organism (GO:0031640);	4 out of 1011 0.395647873392681%	14 out of 23596 0.0593320901847771%	1
Biological Process: defense response to nematode (GO:0002215);	7 out of 1011 0.692383778437191%	44 out of 23596 0.186472283437871%	1
Biological Process: alcohol biosynthetic process (GO:0046165);	7 out of 1011 0.692383778437191%	44 out of 23596 0.186472283437871%	1
Biological Process: reductive pentose-phosphate cycle (GO:0019253);	5 out of 1011 0.494559841740851%	23 out of 23596 0.0974741481607052%	1
Biological Process: response to hydrogen peroxide (GO:0042542);	30 out of 1011 2.9673590504451%	404 out of 23596 1.712154602475%	1
Biological Process: glucuronoxylan metabolic process (GO:0010413);	34 out of 1011 3.36300692383778%	476 out of 23596 2.01729106628242%	1
Biological Process: xylan biosynthetic process (GO:0045492);	34 out of 1011 3.36300692383778%	476 out of 23596 2.01729106628242%	1
Biological Process: post-embryonic morphogenesis (GO:0009886);	18 out of 1011 1.78041543026706%	202 out of 23596 0.856077301237498%	1
Biological Process: response to low light intensity stimulus (GO:0009645);	4 out of 1011 0.395647873392681%	15 out of 23596 0.0635700966265469%	1
Biological Process: positive regulation of gibberellic acid mediated signaling pathway (GO:0009939);	4 out of 1011 0.395647873392681%	15 out of 23596 0.0635700966265469%	1
Biological Process: unidimensional cell growth (GO:0009826);	26 out of 1011 2.57171117705242%	343 out of 23596 1.45363620952704%	1
Biological Process: negative regulation of growth (GO:0045926);	5 out of 1011 0.494559841740851%	25 out of 23596 0.105950161044245%	1
Biological Process: protein glutathionylation (GO:0010731);	3 out of 1011 0.29673590504451%	8 out of 23596 0.0339040515341583%	1
Biological Process: lipid modification (GO:0030258);	3 out of 1011 0.29673590504451%	8 out of 23596 0.0339040515341583%	1
Biological Process: drug transmembrane transport (GO:0006855);	18 out of 1011 1.78041543026706%	209 out of 23596 0.885743346329886%	1
Biological Process: response to cyclopentenone (GO:0010583);	26 out of 1011 2.57171117705242%	345 out of 23596 1.46211222241058%	1
Biological Process: cell wall organization (GO:0071555);	34 out of 1011 3.36300692383778%	489 out of 23596 2.07238515002543%	1
Biological Process: release of seed from dormancy (GO:0048838);	4 out of 1011 0.395647873392681%	17 out of 23596 0.0720461095100865%	1
Biological Process: generation of neurons (GO:0048699);	4 out of 1011 0.395647873392681%	17 out of 23596 0.0720461095100865%	1
Biological Process: regulation of abscisic acid biosynthetic process (GO:0010115);	4 out of 1011 0.395647873392681%	17 out of 23596 0.0720461095100865%	1
Biological Process: protein targeting to membrane (GO:0006612);	65 out of 1011 6.42927794263106%	1096 out of 23596 4.64485506017969%	1
Biological Process: anther development (GO:0048653);	20 out of 1011 1.9782393669634%	248 out of 23596 1.05102559755891%	1
Biological Process: negative regulation of protein kinase activity (GO:0006469);	5 out of 1011 0.494559841740851%	27 out of 23596 0.114426173927784%	1
Biological Process: polarity specification of adaxial/abaxial axis (GO:0009944);	23 out of 1011 2.27497527200791%	300 out of 23596 1.27140193253094%	1
Biological Process: ornithine biosynthetic process (GO:0006592);	2 out of 1011 0.19782393669634%	3 out of 23596 0.0127140193253094%	1
Biological Process: modification by symbiont of host morphology or physiology (GO:0044003);	2 out of 1011 0.19782393669634%	3 out of 23596 0.0127140193253094%	1
Biological Process: glucose-6-phosphate transport (GO:0015760);	3 out of 1011 0.29673590504451%	9 out of 23596 0.0381420579759281%	1
Biological Process: leaf senescence (GO:0010150);	25 out of 1011 2.47279920870425%	337 out of 23596 1.42820817087642%	1
Biological Process: plant-type cell wall modification involved in multidimensional cell growth (GO:0009831);	5 out of 1011 0.494559841740851%	28 out of 23596 0.118664180369554%	1
Biological Process: microtubule depolymerization (GO:0007019);	4 out of 1011 0.395647873392681%	18 out of 23596 0.0762841159518562%	1
Biological Process: defense response to Gram-positive bacterium (GO:0050830);	4 out of 1011 0.395647873392681%	18 out of 23596 0.0762841159518562%	1
Biological Process: flower development (GO:0009908);	25 out of 1011 2.47279920870425%	340 out of 23596 1.44092219020173%	1
Biological Process: maltose metabolic process (GO:0000023);	24 out of 1011 2.37388724035608%	323 out of 23596 1.36887608069164%	1
Biological Process: primary cell wall biogenesis (GO:0009833);	5 out of 1011 0.494559841740851%	29 out of 23596 0.122902186811324%	1
Biological Process: positive regulation of organ growth (GO:0046622);	3 out of 1011 0.29673590504451%	10 out of 23596 0.0423800644176979%	1
Biological Process: organic substance transport (GO:0071702);	16 out of 1011 1.58259149357072%	190 out of 23596 0.80522122393626%	1
Biological Process: determination of bilateral symmetry (GO:0009855);	24 out of 1011 2.37388724035608%	328 out of 23596 1.39006611290049%	1
Biological Process: transmembrane receptor protein tyrosine kinase signaling pathway (GO:0007169);	19 out of 1011 1.87932739861523%	242 out of 23596 1.02559755890829%	1
Biological Process: response to auxin stimulus (GO:0009733);	48 out of 1011 4.74777448071217%	784 out of 23596 3.32259705034752%	1
Biological Process: root development (GO:0048364);	28 out of 1011 2.76953511374876%	403 out of 23596 1.70791659603323%	1
Biological Process: myo-inositol hexakisphosphate biosynthetic process (GO:0010264);	11 out of 1011 1.08803165182987%	112 out of 23596 0.474656721478217%	1
Biological Process: negative regulation of programmed cell death (GO:0043069);	44 out of 1011 4.35212660731949%	707 out of 23596 2.99627055433124%	1
Biological Process: stamen development (GO:0048443);	20 out of 1011 1.9782393669634%	262 out of 23596 1.11035768774369%	1
Biological Process: leaf formation (GO:0010338);	4 out of 1011 0.395647873392681%	20 out of 23596 0.0847601288353958%	1
Biological Process: petal morphogenesis (GO:0048446);	4 out of 1011 0.395647873392681%	20 out of 23596 0.0847601288353958%	1
Biological Process: carpel development (GO:0048440);	12 out of 1011 1.18694362017804%	129 out of 23596 0.546702830988303%	1
Biological Process: microtubule bundle formation (GO:0001578);	6 out of 1011 0.593471810089021%	43 out of 23596 0.182234276996101%	1
Biological Process: spindle assembly involved in mitosis (GO:0090307);	6 out of 1011 0.593471810089021%	43 out of 23596 0.182234276996101%	1
Biological Process: regulation of calcium ion transport (GO:0051924);	6 out of 1011 0.593471810089021%	43 out of 23596 0.182234276996101%	1
Biological Process: lignin metabolic process (GO:0009808);	8 out of 1011 0.791295746785361%	70 out of 23596 0.296660450923885%	1
Biological Process: phosphoenolpyruvate transport (GO:0015714);	3 out of 1011 0.29673590504451%	11 out of 23596 0.0466180708594677%	1
Biological Process: phosphoglycerate transport (GO:0015713);	3 out of 1011 0.29673590504451%	11 out of 23596 0.0466180708594677%	1
Biological Process: regulation of symbiosis, encompassing mutualism through parasitism (GO:0043903);	3 out of 1011 0.29673590504451%	11 out of 23596 0.0466180708594677%	1
Biological Process: triose phosphate transmembrane transport (GO:0035436);	3 out of 1011 0.29673590504451%	11 out of 23596 0.0466180708594677%	1
Biological Process: inositol catabolic process (GO:0019310);	2 out of 1011 0.19782393669634%	4 out of 23596 0.0169520257670792%	1
Biological Process: regulation of release of sequestered calcium ion into cytosol by sarcoplasmic reticulum (GO:0010880);	2 out of 1011 0.19782393669634%	4 out of 23596 0.0169520257670792%	1
Biological Process: triterpenoid biosynthetic process (GO:0016104);	2 out of 1011 0.19782393669634%	4 out of 23596 0.0169520257670792%	1
Biological Process: ferredoxin metabolic process (GO:0006124);	2 out of 1011 0.19782393669634%	4 out of 23596 0.0169520257670792%	1
Biological Process: short-day photoperiodism (GO:0048572);	2 out of 1011 0.19782393669634%	4 out of 23596 0.0169520257670792%	1
Biological Process: ergosterol metabolic process (GO:0008204);	2 out of 1011 0.19782393669634%	4 out of 23596 0.0169520257670792%	1
Biological Process: histone H3-K36 demethylation (GO:0070544);	2 out of 1011 0.19782393669634%	4 out of 23596 0.0169520257670792%	1
Biological Process: organic substance metabolic process (GO:0071704);	29 out of 1011 2.86844708209693%	429 out of 23596 1.81810476351924%	1
Biological Process: positive regulation of short-day photoperiodism, flowering (GO:0048576);	5 out of 1011 0.494559841740851%	32 out of 23596 0.135616206136633%	1
Biological Process: negative regulation of catalytic activity (GO:0043086);	12 out of 1011 1.18694362017804%	132 out of 23596 0.559416850313612%	1
Biological Process: response to herbivore (GO:0080027);	9 out of 1011 0.890207715133531%	86 out of 23596 0.364468553992202%	1
Biological Process: cellular developmental process (GO:0048869);	15 out of 1011 1.48367952522255%	182 out of 23596 0.771317172402102%	1
Biological Process: regulation of shoot development (GO:0048831);	6 out of 1011 0.593471810089021%	45 out of 23596 0.190710289879641%	1
Biological Process: response to UV (GO:0009411);	17 out of 1011 1.68150346191889%	216 out of 23596 0.915409391422275%	1
Biological Process: amino acid import (GO:0043090);	22 out of 1011 2.17606330365974%	304 out of 23596 1.28835395829802%	1
Biological Process: amino acid homeostasis (GO:0080144);	5 out of 1011 0.494559841740851%	33 out of 23596 0.139854212578403%	1
Biological Process: steroid biosynthetic process (GO:0006694);	8 out of 1011 0.791295746785361%	73 out of 23596 0.309374470249195%	1
Biological Process: trichoblast differentiation (GO:0010054);	10 out of 1011 0.989119683481701%	103 out of 23596 0.436514663502289%	1
Biological Process: cellular aromatic compound metabolic process (GO:0006725);	13 out of 1011 1.28585558852621%	151 out of 23596 0.639938972707239%	1
Biological Process: response to alcohol (GO:0097305);	7 out of 1011 0.692383778437191%	60 out of 23596 0.254280386506188%	1
Biological Process: response to abscisic acid stimulus (GO:0009737);	69 out of 1011 6.82492581602374%	1235 out of 23596 5.23393795558569%	1
Biological Process: ion homeostasis (GO:0050801);	4 out of 1011 0.395647873392681%	23 out of 23596 0.0974741481607052%	1
Biological Process: photosynthetic acclimation (GO:0009643);	4 out of 1011 0.395647873392681%	23 out of 23596 0.0974741481607052%	1
Biological Process: positive regulation of tryptophan metabolic process (GO:0090358);	4 out of 1011 0.395647873392681%	23 out of 23596 0.0974741481607052%	1
Biological Process: response to herbicide (GO:0009635);	4 out of 1011 0.395647873392681%	23 out of 23596 0.0974741481607052%	1
Biological Process: positive regulation of auxin metabolic process (GO:0090355);	4 out of 1011 0.395647873392681%	23 out of 23596 0.0974741481607052%	1
Biological Process: galactolipid biosynthetic process (GO:0019375);	19 out of 1011 1.87932739861523%	258 out of 23596 1.09340566197661%	1
Biological Process: regulation of cardiac muscle cell action potential (GO:0086001);	5 out of 1011 0.494559841740851%	35 out of 23596 0.148330225461943%	1
Biological Process: root hair cell development (GO:0080147);	6 out of 1011 0.593471810089021%	48 out of 23596 0.20342430920495%	1
Biological Process: inositol phosphate-mediated signaling (GO:0048016);	2 out of 1011 0.19782393669634%	5 out of 23596 0.021190032208849%	1
Biological Process: glutamine secretion (GO:0010585);	2 out of 1011 0.19782393669634%	5 out of 23596 0.021190032208849%	1
Biological Process: S-methylmethionine cycle (GO:0033528);	2 out of 1011 0.19782393669634%	5 out of 23596 0.021190032208849%	1
Biological Process: L-proline biosynthetic process (GO:0055129);	2 out of 1011 0.19782393669634%	5 out of 23596 0.021190032208849%	1
Biological Process: regulation of amino acid export (GO:0080143);	2 out of 1011 0.19782393669634%	5 out of 23596 0.021190032208849%	1
Biological Process: defense response, incompatible interaction (GO:0009814);	13 out of 1011 1.28585558852621%	156 out of 23596 0.661129004916088%	1
Biological Process: response to salicylic acid stimulus (GO:0009751);	31 out of 1011 3.06627101879327%	483 out of 23596 2.04695711137481%	1
Biological Process: salicylic acid mediated signaling pathway (GO:0009863);	25 out of 1011 2.47279920870425%	370 out of 23596 1.56806238345482%	1
Biological Process: abscisic acid transport (GO:0080168);	10 out of 1011 0.989119683481701%	108 out of 23596 0.457704695711137%	1
Biological Process: lateral root development (GO:0048527);	19 out of 1011 1.87932739861523%	261 out of 23596 1.10611968130192%	1
Biological Process: far-red light signaling pathway (GO:0010018);	5 out of 1011 0.494559841740851%	36 out of 23596 0.152568231903712%	1
Biological Process: transition metal ion transport (GO:0000041);	19 out of 1011 1.87932739861523%	262 out of 23596 1.11035768774369%	1
Biological Process: tripeptide transport (GO:0042939);	8 out of 1011 0.791295746785361%	78 out of 23596 0.330564502458044%	1
Biological Process: negative regulation of defense response (GO:0031348);	40 out of 1011 3.95647873392681%	662 out of 23596 2.8055602644516%	1
Biological Process: response to histidine (GO:0080052);	7 out of 1011 0.692383778437191%	64 out of 23596 0.271232412273267%	1
Biological Process: response to phenylalanine (GO:0080053);	7 out of 1011 0.692383778437191%	64 out of 23596 0.271232412273267%	1
Biological Process: acetyl-CoA metabolic process (GO:0006084);	15 out of 1011 1.48367952522255%	193 out of 23596 0.81793524326157%	1
Biological Process: chitin catabolic process (GO:0006032);	6 out of 1011 0.593471810089021%	50 out of 23596 0.21190032208849%	1
Biological Process: indole-containing compound metabolic process (GO:0042430);	6 out of 1011 0.593471810089021%	50 out of 23596 0.21190032208849%	1
Biological Process: response to ozone (GO:0010193);	20 out of 1011 1.9782393669634%	282 out of 23596 1.19511781657908%	1
Biological Process: response to bacterium (GO:0009617);	33 out of 1011 3.26409495548961%	527 out of 23596 2.23342939481268%	1
Biological Process: external encapsulating structure organization (GO:0045229);	8 out of 1011 0.791295746785361%	79 out of 23596 0.334802508899814%	1
Biological Process: pollen-pistil interaction (GO:0009875);	10 out of 1011 0.989119683481701%	110 out of 23596 0.466180708594677%	1
Biological Process: positive regulation of abscisic acid biosynthetic process (GO:0010116);	3 out of 1011 0.29673590504451%	14 out of 23596 0.0593320901847771%	1
Biological Process: isoflavonoid phytoalexin biosynthetic process (GO:0009701);	3 out of 1011 0.29673590504451%	14 out of 23596 0.0593320901847771%	1
Biological Process: response to osmotic stress (GO:0006970);	17 out of 1011 1.68150346191889%	229 out of 23596 0.970503475165282%	1
Biological Process: response to cadmium ion (GO:0046686);	74 out of 1011 7.31948565776459%	1359 out of 23596 5.75945075436515%	1
Biological Process: regulation of plant-type hypersensitive response (GO:0010363);	63 out of 1011 6.23145400593472%	1132 out of 23596 4.7974232920834%	1
Biological Process: lytic vacuole organization (GO:0080171);	4 out of 1011 0.395647873392681%	25 out of 23596 0.105950161044245%	1
Biological Process: phosphorus metabolic process (GO:0006793);	4 out of 1011 0.395647873392681%	25 out of 23596 0.105950161044245%	1
Biological Process: cellular response to water deprivation (GO:0042631);	16 out of 1011 1.58259149357072%	213 out of 23596 0.902695372096966%	1
Biological Process: phenylpropanoid metabolic process (GO:0009698);	9 out of 1011 0.890207715133531%	96 out of 23596 0.4068486184099%	1
Biological Process: plant-type cell wall organization or biogenesis (GO:0071669);	9 out of 1011 0.890207715133531%	96 out of 23596 0.4068486184099%	1
Biological Process: regulation of metabolic process (GO:0019222);	10 out of 1011 0.989119683481701%	112 out of 23596 0.474656721478217%	1
Biological Process: regulation of intracellular pH (GO:0051453);	5 out of 1011 0.494559841740851%	38 out of 23596 0.161044244787252%	1
Biological Process: protein oligomerization (GO:0051259);	5 out of 1011 0.494559841740851%	38 out of 23596 0.161044244787252%	1
Biological Process: cation transport (GO:0006812);	13 out of 1011 1.28585558852621%	162 out of 23596 0.686557043566706%	1
Biological Process: carboxylic acid metabolic process (GO:0019752);	9 out of 1011 0.890207715133531%	97 out of 23596 0.41108662485167%	1
Biological Process: plant-type cell wall biogenesis (GO:0009832);	22 out of 1011 2.17606330365974%	325 out of 23596 1.37735209357518%	1
Biological Process: dipeptide transport (GO:0042938);	8 out of 1011 0.791295746785361%	82 out of 23596 0.347516528225123%	1
Biological Process: response to carbohydrate stimulus (GO:0009743);	8 out of 1011 0.791295746785361%	82 out of 23596 0.347516528225123%	1
Biological Process: negative regulation of flocculation (GO:0060257);	3 out of 1011 0.29673590504451%	15 out of 23596 0.0635700966265469%	1
Biological Process: nitrogen fixation (GO:0009399);	3 out of 1011 0.29673590504451%	15 out of 23596 0.0635700966265469%	1
Biological Process: GDP-L-fucose biosynthetic process (GO:0042350);	3 out of 1011 0.29673590504451%	15 out of 23596 0.0635700966265469%	1
Biological Process: cellular lipid catabolic process (GO:0044242);	3 out of 1011 0.29673590504451%	15 out of 23596 0.0635700966265469%	1
Biological Process: regulation of DNA metabolic process (GO:0051052);	3 out of 1011 0.29673590504451%	15 out of 23596 0.0635700966265469%	1
Biological Process: auxin influx (GO:0060919);	3 out of 1011 0.29673590504451%	15 out of 23596 0.0635700966265469%	1
Biological Process: starch metabolic process (GO:0005982);	12 out of 1011 1.18694362017804%	147 out of 23596 0.622986946940159%	1
Biological Process: long-day photoperiodism (GO:0048571);	2 out of 1011 0.19782393669634%	6 out of 23596 0.0254280386506187%	1
Biological Process: citrulline biosynthetic process (GO:0019240);	2 out of 1011 0.19782393669634%	6 out of 23596 0.0254280386506187%	1
Biological Process: xyloglucan metabolic process (GO:0010411);	5 out of 1011 0.494559841740851%	39 out of 23596 0.165282251229022%	1
Biological Process: alkaloid biosynthetic process (GO:0009821);	5 out of 1011 0.494559841740851%	39 out of 23596 0.165282251229022%	1
Biological Process: red light signaling pathway (GO:0010161);	6 out of 1011 0.593471810089021%	53 out of 23596 0.224614341413799%	1
Biological Process: cytokinin mediated signaling pathway (GO:0009736);	12 out of 1011 1.18694362017804%	148 out of 23596 0.627224953381929%	1
Biological Process: specification of floral organ identity (GO:0010093);	12 out of 1011 1.18694362017804%	149 out of 23596 0.631462959823699%	1
Biological Process: thyroid hormone transport (GO:0070327);	4 out of 1011 0.395647873392681%	27 out of 23596 0.114426173927784%	1
Biological Process: response to methotrexate (GO:0031427);	4 out of 1011 0.395647873392681%	27 out of 23596 0.114426173927784%	1
Biological Process: arginine transport (GO:0015809);	4 out of 1011 0.395647873392681%	27 out of 23596 0.114426173927784%	1
Biological Process: cellular chloride ion homeostasis (GO:0030644);	4 out of 1011 0.395647873392681%	27 out of 23596 0.114426173927784%	1
Biological Process: prostaglandin transport (GO:0015732);	4 out of 1011 0.395647873392681%	27 out of 23596 0.114426173927784%	1
Biological Process: amino acid export (GO:0032973);	4 out of 1011 0.395647873392681%	27 out of 23596 0.114426173927784%	1
Biological Process: cell wall thickening (GO:0052386);	5 out of 1011 0.494559841740851%	40 out of 23596 0.169520257670792%	1
Biological Process: plastid organization (GO:0009657);	10 out of 1011 0.989119683481701%	116 out of 23596 0.491608747245296%	1
Biological Process: very long-chain fatty acid metabolic process (GO:0000038);	10 out of 1011 0.989119683481701%	116 out of 23596 0.491608747245296%	1
Biological Process: cellular response to iron ion starvation (GO:0010106);	23 out of 1011 2.27497527200791%	349 out of 23596 1.47906424817766%	1
Biological Process: cellular component organization or biogenesis (GO:0071840);	7 out of 1011 0.692383778437191%	69 out of 23596 0.292422444482116%	1
Biological Process: stomatal complex morphogenesis (GO:0010103);	25 out of 1011 2.47279920870425%	388 out of 23596 1.64434649940668%	1
Biological Process: response to inorganic substance (GO:0010035);	17 out of 1011 1.68150346191889%	239 out of 23596 1.01288353958298%	1
Biological Process: meristem initiation (GO:0010014);	23 out of 1011 2.27497527200791%	351 out of 23596 1.4875402610612%	1
Biological Process: indoleacetic acid biosynthetic process (GO:0009684);	18 out of 1011 1.78041543026706%	258 out of 23596 1.09340566197661%	1
Biological Process: cellular polysaccharide biosynthetic process (GO:0033692);	5 out of 1011 0.494559841740851%	41 out of 23596 0.173758264112561%	1
Biological Process: flavonoid metabolic process (GO:0009812);	5 out of 1011 0.494559841740851%	41 out of 23596 0.173758264112561%	1
Biological Process: auxin efflux (GO:0010315);	4 out of 1011 0.395647873392681%	28 out of 23596 0.118664180369554%	1
Biological Process: metal ion transport (GO:0030001);	9 out of 1011 0.890207715133531%	103 out of 23596 0.436514663502289%	1
Biological Process: cellular response to hypoxia (GO:0071456);	9 out of 1011 0.890207715133531%	103 out of 23596 0.436514663502289%	1
Biological Process: fertilization, exchange of chromosomal proteins (GO:0035042);	2 out of 1011 0.19782393669634%	7 out of 23596 0.0296660450923885%	1
Biological Process: regulation of cellular component size (GO:0032535);	2 out of 1011 0.19782393669634%	7 out of 23596 0.0296660450923885%	1
Biological Process: cysteine metabolic process (GO:0006534);	2 out of 1011 0.19782393669634%	7 out of 23596 0.0296660450923885%	1
Biological Process: inner ear morphogenesis (GO:0042472);	2 out of 1011 0.19782393669634%	7 out of 23596 0.0296660450923885%	1
Biological Process: nuclear mRNA 3'-splice site recognition (GO:0000389);	2 out of 1011 0.19782393669634%	7 out of 23596 0.0296660450923885%	1
Biological Process: neurotransmitter metabolic process (GO:0042133);	2 out of 1011 0.19782393669634%	7 out of 23596 0.0296660450923885%	1
Biological Process: regulation of Rho GTPase activity (GO:0032319);	2 out of 1011 0.19782393669634%	7 out of 23596 0.0296660450923885%	1
Biological Process: microtubule anchoring at centrosome (GO:0034454);	2 out of 1011 0.19782393669634%	7 out of 23596 0.0296660450923885%	1
Biological Process: regulation of photomorphogenesis (GO:0010099);	4 out of 1011 0.395647873392681%	29 out of 23596 0.122902186811324%	1
Biological Process: regulation of ion transmembrane transport (GO:0034765);	4 out of 1011 0.395647873392681%	29 out of 23596 0.122902186811324%	1
Biological Process: aspartate transport (GO:0015810);	3 out of 1011 0.29673590504451%	17 out of 23596 0.0720461095100865%	1
Biological Process: tryptophan transport (GO:0015827);	3 out of 1011 0.29673590504451%	17 out of 23596 0.0720461095100865%	1
Biological Process: zonula adherens maintenance (GO:0045218);	3 out of 1011 0.29673590504451%	17 out of 23596 0.0720461095100865%	1
Biological Process: epithelial cell-cell adhesion (GO:0090136);	3 out of 1011 0.29673590504451%	17 out of 23596 0.0720461095100865%	1
Biological Process: motile cilium assembly (GO:0044458);	3 out of 1011 0.29673590504451%	17 out of 23596 0.0720461095100865%	1
Biological Process: filamentous growth of a population of unicellular organisms in response to heat (GO:0036168);	3 out of 1011 0.29673590504451%	17 out of 23596 0.0720461095100865%	1
Biological Process: cellular metabolic process (GO:0044237);	34 out of 1011 3.36300692383778%	571 out of 23596 2.41990167825055%	1
Biological Process: response to leucine (GO:0043201);	7 out of 1011 0.692383778437191%	72 out of 23596 0.305136463807425%	1
Biological Process: regulation of protein localization (GO:0032880);	15 out of 1011 1.48367952522255%	208 out of 23596 0.881505339888117%	1
Biological Process: starch catabolic process (GO:0005983);	8 out of 1011 0.791295746785361%	88 out of 23596 0.372944566875742%	1
Biological Process: iron ion transport (GO:0006826);	24 out of 1011 2.37388724035608%	377 out of 23596 1.59772842854721%	1
Biological Process: galactose metabolic process (GO:0006012);	5 out of 1011 0.494559841740851%	43 out of 23596 0.182234276996101%	1
Biological Process: response to organic substance (GO:0010033);	27 out of 1011 2.67062314540059%	436 out of 23596 1.84777080861163%	1
Biological Process: gibberellic acid mediated signaling pathway (GO:0009740);	16 out of 1011 1.58259149357072%	228 out of 23596 0.966265468723512%	1
Biological Process: imaginal disc-derived wing morphogenesis (GO:0007476);	4 out of 1011 0.395647873392681%	30 out of 23596 0.127140193253094%	1
Biological Process: xylem and phloem pattern formation (GO:0010051);	18 out of 1011 1.78041543026706%	266 out of 23596 1.12730971351076%	1
Biological Process: response to chitin (GO:0010200);	60 out of 1011 5.93471810089021%	1110 out of 23596 4.70418715036447%	1
Biological Process: negative regulation of cell aging (GO:0090344);	3 out of 1011 0.29673590504451%	18 out of 23596 0.0762841159518562%	1
Biological Process: xylan catabolic process (GO:0045493);	3 out of 1011 0.29673590504451%	18 out of 23596 0.0762841159518562%	1
Biological Process: system development (GO:0048731);	23 out of 1011 2.27497527200791%	362 out of 23596 1.53415833192066%	1
Biological Process: response to gibberellin stimulus (GO:0009739);	17 out of 1011 1.68150346191889%	249 out of 23596 1.05526360400068%	1
Biological Process: photosynthesis, light harvesting (GO:0009765);	4 out of 1011 0.395647873392681%	31 out of 23596 0.131378199694864%	1
Biological Process: cellular water homeostasis (GO:0009992);	4 out of 1011 0.395647873392681%	31 out of 23596 0.131378199694864%	1
Biological Process: glutamate metabolic process (GO:0006536);	4 out of 1011 0.395647873392681%	31 out of 23596 0.131378199694864%	1
Biological Process: intracellular transport (GO:0046907);	12 out of 1011 1.18694362017804%	160 out of 23596 0.678081030683167%	1
Biological Process: oxalate catabolic process (GO:0033611);	1 out of 1011 0.0989119683481701%	1 out of 23596 0.00423800644176979%	1
Biological Process: diencephalon morphogenesis (GO:0048852);	1 out of 1011 0.0989119683481701%	1 out of 23596 0.00423800644176979%	1
Biological Process: coagulation (GO:0050817);	1 out of 1011 0.0989119683481701%	1 out of 23596 0.00423800644176979%	1
Biological Process: stachyose biosynthetic process (GO:0033532);	1 out of 1011 0.0989119683481701%	1 out of 23596 0.00423800644176979%	1
Biological Process: regulation of phosphatidylinositol 3-kinase cascade (GO:0014066);	1 out of 1011 0.0989119683481701%	1 out of 23596 0.00423800644176979%	1
Biological Process: metencephalon development (GO:0022037);	1 out of 1011 0.0989119683481701%	1 out of 23596 0.00423800644176979%	1
Biological Process: raffinose catabolic process (GO:0034484);	1 out of 1011 0.0989119683481701%	1 out of 23596 0.00423800644176979%	1
Biological Process: photosynthetic NADP+ reduction (GO:0009780);	1 out of 1011 0.0989119683481701%	1 out of 23596 0.00423800644176979%	1
Biological Process: coenzyme M biosynthetic process (GO:0019295);	1 out of 1011 0.0989119683481701%	1 out of 23596 0.00423800644176979%	1
Biological Process: methionine catabolic process via 2-oxobutanoate (GO:0019458);	1 out of 1011 0.0989119683481701%	1 out of 23596 0.00423800644176979%	1
Biological Process: estrogen biosynthetic process (GO:0006703);	1 out of 1011 0.0989119683481701%	1 out of 23596 0.00423800644176979%	1
Biological Process: synaptic target recognition (GO:0008039);	2 out of 1011 0.19782393669634%	8 out of 23596 0.0339040515341583%	1
Biological Process: carbohydrate storage (GO:0052576);	2 out of 1011 0.19782393669634%	8 out of 23596 0.0339040515341583%	1
Biological Process: eye development (GO:0001654);	2 out of 1011 0.19782393669634%	8 out of 23596 0.0339040515341583%	1
Biological Process: cytokinetic process (GO:0032506);	2 out of 1011 0.19782393669634%	8 out of 23596 0.0339040515341583%	1
Biological Process: regulation of root development (GO:2000280);	2 out of 1011 0.19782393669634%	8 out of 23596 0.0339040515341583%	1
Biological Process: response to selenium ion (GO:0010269);	2 out of 1011 0.19782393669634%	8 out of 23596 0.0339040515341583%	1
Biological Process: cellular response to desiccation (GO:0071465);	2 out of 1011 0.19782393669634%	8 out of 23596 0.0339040515341583%	1
Biological Process: regulation of growth rate (GO:0040009);	2 out of 1011 0.19782393669634%	8 out of 23596 0.0339040515341583%	1
Biological Process: regulation of intracellular transport (GO:0032386);	3 out of 1011 0.29673590504451%	19 out of 23596 0.080522122393626%	1
Biological Process: cell communication involved in cardiac conduction (GO:0086065);	3 out of 1011 0.29673590504451%	19 out of 23596 0.080522122393626%	1
Biological Process: regulation of cardiac muscle contraction (GO:0055117);	3 out of 1011 0.29673590504451%	19 out of 23596 0.080522122393626%	1
Biological Process: barbed-end actin filament capping (GO:0051016);	3 out of 1011 0.29673590504451%	19 out of 23596 0.080522122393626%	1
Biological Process: glutathione biosynthetic process (GO:0006750);	3 out of 1011 0.29673590504451%	19 out of 23596 0.080522122393626%	1
Biological Process: ATP biosynthetic process (GO:0006754);	6 out of 1011 0.593471810089021%	61 out of 23596 0.258518392947957%	1
Biological Process: diterpenoid biosynthetic process (GO:0016102);	5 out of 1011 0.494559841740851%	46 out of 23596 0.19494829632141%	1
Biological Process: positive regulation of flavonoid biosynthetic process (GO:0009963);	25 out of 1011 2.47279920870425%	409 out of 23596 1.73334463468384%	1
Biological Process: primary metabolic process (GO:0044238);	55 out of 1011 5.44015825914936%	1022 out of 23596 4.33124258348873%	1
Biological Process: maintenance of seed dormancy (GO:0010231);	5 out of 1011 0.494559841740851%	47 out of 23596 0.19918630276318%	1
Biological Process: ion transport (GO:0006811);	15 out of 1011 1.48367952522255%	219 out of 23596 0.928123410747584%	1
Biological Process: abscisic acid metabolic process (GO:0009687);	4 out of 1011 0.395647873392681%	33 out of 23596 0.139854212578403%	1
Biological Process: pollen tube reception (GO:0010483);	4 out of 1011 0.395647873392681%	33 out of 23596 0.139854212578403%	1
Biological Process: embryo sac cellularization (GO:0009558);	3 out of 1011 0.29673590504451%	20 out of 23596 0.0847601288353958%	1
Biological Process: rRNA processing (GO:0006364);	27 out of 1011 2.67062314540059%	452 out of 23596 1.91557891167995%	1
Biological Process: response to light stimulus (GO:0009416);	24 out of 1011 2.37388724035608%	393 out of 23596 1.66553653161553%	1
Biological Process: lipid metabolic process (GO:0006629);	18 out of 1011 1.78041543026706%	277 out of 23596 1.17392778437023%	1
Biological Process: transmembrane transport (GO:0055085);	33 out of 1011 3.26409495548961%	573 out of 23596 2.42837769113409%	1
Biological Process: developmental growth involved in morphogenesis (GO:0060560);	13 out of 1011 1.28585558852621%	184 out of 23596 0.779793185285642%	1
Biological Process: glutathione metabolic process (GO:0006749);	5 out of 1011 0.494559841740851%	48 out of 23596 0.20342430920495%	1
Biological Process: defense response signaling pathway, resistance gene-dependent (GO:0009870);	5 out of 1011 0.494559841740851%	48 out of 23596 0.20342430920495%	1
Biological Process: regulation of pollen tube growth (GO:0080092);	8 out of 1011 0.791295746785361%	96 out of 23596 0.4068486184099%	1
Biological Process: systemic acquired resistance, salicylic acid mediated signaling pathway (GO:0009862);	37 out of 1011 3.65974282888229%	655 out of 23596 2.77589421935921%	1
Biological Process: cell morphogenesis involved in neuron differentiation (GO:0048667);	2 out of 1011 0.19782393669634%	9 out of 23596 0.0381420579759281%	1
Biological Process: regulation of lateral root development (GO:2000023);	2 out of 1011 0.19782393669634%	9 out of 23596 0.0381420579759281%	1
Biological Process: sensory perception (GO:0007600);	2 out of 1011 0.19782393669634%	9 out of 23596 0.0381420579759281%	1
Biological Process: zinc ion homeostasis (GO:0055069);	2 out of 1011 0.19782393669634%	9 out of 23596 0.0381420579759281%	1
Biological Process: spindle assembly involved in meiosis (GO:0090306);	2 out of 1011 0.19782393669634%	9 out of 23596 0.0381420579759281%	1
Biological Process: chlorophyll a catabolic process (GO:0033310);	2 out of 1011 0.19782393669634%	9 out of 23596 0.0381420579759281%	1
Biological Process: demethylation (GO:0070988);	2 out of 1011 0.19782393669634%	9 out of 23596 0.0381420579759281%	1
Biological Process: regulation of mitotic spindle elongation (GO:0032888);	2 out of 1011 0.19782393669634%	9 out of 23596 0.0381420579759281%	1
Biological Process: radial microtubular system formation (GO:0010245);	2 out of 1011 0.19782393669634%	9 out of 23596 0.0381420579759281%	1
Biological Process: response to vitamin B1 (GO:0010266);	2 out of 1011 0.19782393669634%	9 out of 23596 0.0381420579759281%	1
Biological Process: negative regulation of phosphorylation (GO:0042326);	2 out of 1011 0.19782393669634%	9 out of 23596 0.0381420579759281%	1
Biological Process: retinoid metabolic process (GO:0001523);	2 out of 1011 0.19782393669634%	9 out of 23596 0.0381420579759281%	1
Biological Process: minus-end directed microtubule sliding (GO:0031534);	2 out of 1011 0.19782393669634%	9 out of 23596 0.0381420579759281%	1
Biological Process: pentose-phosphate shunt, non-oxidative branch (GO:0009052);	2 out of 1011 0.19782393669634%	9 out of 23596 0.0381420579759281%	1
Biological Process: pollen maturation (GO:0010152);	6 out of 1011 0.593471810089021%	64 out of 23596 0.271232412273267%	1
Biological Process: negative regulation of long-day photoperiodism, flowering (GO:0048579);	4 out of 1011 0.395647873392681%	34 out of 23596 0.144092219020173%	1
Biological Process: abaxial cell fate specification (GO:0010158);	4 out of 1011 0.395647873392681%	34 out of 23596 0.144092219020173%	1
Biological Process: oligopeptide transport (GO:0006857);	21 out of 1011 2.07715133531157%	337 out of 23596 1.42820817087642%	1
Biological Process: cuticle development (GO:0042335);	17 out of 1011 1.68150346191889%	261 out of 23596 1.10611968130192%	1
Biological Process: meristem development (GO:0048507);	17 out of 1011 1.68150346191889%	261 out of 23596 1.10611968130192%	1
Biological Process: lipid particle organization (GO:0034389);	3 out of 1011 0.29673590504451%	21 out of 23596 0.0889981352771656%	1
Biological Process: positive regulation of secondary growth (GO:2000605);	3 out of 1011 0.29673590504451%	21 out of 23596 0.0889981352771656%	1
Biological Process: response to microbial phytotoxin (GO:0010188);	3 out of 1011 0.29673590504451%	21 out of 23596 0.0889981352771656%	1
Biological Process: epidermis development (GO:0008544);	15 out of 1011 1.48367952522255%	224 out of 23596 0.949313442956433%	1
Biological Process: carotenoid biosynthetic process (GO:0016117);	18 out of 1011 1.78041543026706%	281 out of 23596 1.19087981013731%	1
Biological Process: steroid metabolic process (GO:0008202);	6 out of 1011 0.593471810089021%	65 out of 23596 0.275470418715036%	1
Biological Process: cellular response to osmotic stress (GO:0071470);	6 out of 1011 0.593471810089021%	65 out of 23596 0.275470418715036%	1
Biological Process: glucosinolate metabolic process (GO:0019760);	4 out of 1011 0.395647873392681%	35 out of 23596 0.148330225461943%	1
Biological Process: reactive oxygen species metabolic process (GO:0072593);	5 out of 1011 0.494559841740851%	50 out of 23596 0.21190032208849%	1
Biological Process: chloroplast organization (GO:0009658);	17 out of 1011 1.68150346191889%	264 out of 23596 1.11883370062722%	1
Biological Process: thylakoid membrane organization (GO:0010027);	27 out of 1011 2.67062314540059%	461 out of 23596 1.95372096965587%	1
Biological Process: microtubule-based movement (GO:0007018);	8 out of 1011 0.791295746785361%	100 out of 23596 0.423800644176979%	1
Biological Process: distributive segregation (GO:0032837);	2 out of 1011 0.19782393669634%	10 out of 23596 0.0423800644176979%	1
Biological Process: positive regulation of cell division (GO:0051781);	2 out of 1011 0.19782393669634%	10 out of 23596 0.0423800644176979%	1
Biological Process: photoprotection (GO:0010117);	2 out of 1011 0.19782393669634%	10 out of 23596 0.0423800644176979%	1
Biological Process: cotyledon morphogenesis (GO:0048826);	2 out of 1011 0.19782393669634%	10 out of 23596 0.0423800644176979%	1
Biological Process: negative regulation of post-embryonic development (GO:0048581);	2 out of 1011 0.19782393669634%	10 out of 23596 0.0423800644176979%	1
Biological Process: blood vessel development (GO:0001568);	3 out of 1011 0.29673590504451%	22 out of 23596 0.0932361417189354%	1
Biological Process: regulation of ion transmembrane transporter activity (GO:0032412);	3 out of 1011 0.29673590504451%	22 out of 23596 0.0932361417189354%	1
Biological Process: alcohol metabolic process (GO:0006066);	4 out of 1011 0.395647873392681%	36 out of 23596 0.152568231903712%	1
Biological Process: positive regulation of flower development (GO:0009911);	12 out of 1011 1.18694362017804%	172 out of 23596 0.728937107984404%	1
Biological Process: protein dephosphorylation (GO:0006470);	10 out of 1011 0.989119683481701%	136 out of 23596 0.576368876080692%	1
Biological Process: microtubule nucleation (GO:0007020);	15 out of 1011 1.48367952522255%	229 out of 23596 0.970503475165282%	1
Biological Process: cellular response to stress (GO:0033554);	21 out of 1011 2.07715133531157%	346 out of 23596 1.46635022885235%	1
Biological Process: sequestering of metal ion (GO:0051238);	4 out of 1011 0.395647873392681%	37 out of 23596 0.156806238345482%	1
Biological Process: Golgi to vacuole transport (GO:0006896);	4 out of 1011 0.395647873392681%	37 out of 23596 0.156806238345482%	1
Biological Process: regulation of hydrogen peroxide metabolic process (GO:0010310);	27 out of 1011 2.67062314540059%	468 out of 23596 1.98338701474826%	1
Biological Process: sucrose catabolic process (GO:0005987);	3 out of 1011 0.29673590504451%	23 out of 23596 0.0974741481607052%	1
Biological Process: pectin catabolic process (GO:0045490);	8 out of 1011 0.791295746785361%	103 out of 23596 0.436514663502289%	1
Biological Process: chlorophyll biosynthetic process (GO:0015995);	15 out of 1011 1.48367952522255%	232 out of 23596 0.983217494490592%	1
Biological Process: positive regulation of abscisic acid mediated signaling pathway (GO:0009789);	6 out of 1011 0.593471810089021%	69 out of 23596 0.292422444482116%	1
Biological Process: proline transport (GO:0015824);	14 out of 1011 1.38476755687438%	213 out of 23596 0.902695372096966%	1
Biological Process: regulation of starch biosynthetic process (GO:0010581);	2 out of 1011 0.19782393669634%	11 out of 23596 0.0466180708594677%	1
Biological Process: embryonic digestive tract morphogenesis (GO:0048557);	2 out of 1011 0.19782393669634%	11 out of 23596 0.0466180708594677%	1
Biological Process: flavonol metabolic process (GO:0051554);	2 out of 1011 0.19782393669634%	11 out of 23596 0.0466180708594677%	1
Biological Process: response to low fluence blue light stimulus by blue low-fluence system (GO:0010244);	2 out of 1011 0.19782393669634%	11 out of 23596 0.0466180708594677%	1
Biological Process: arabinan catabolic process (GO:0031222);	2 out of 1011 0.19782393669634%	11 out of 23596 0.0466180708594677%	1
Biological Process: chaeta morphogenesis (GO:0008407);	2 out of 1011 0.19782393669634%	11 out of 23596 0.0466180708594677%	1
Biological Process: spermatid nucleus elongation (GO:0007290);	2 out of 1011 0.19782393669634%	11 out of 23596 0.0466180708594677%	1
Biological Process: tissue development (GO:0009888);	15 out of 1011 1.48367952522255%	234 out of 23596 0.991693507374131%	1
Biological Process: response to stress (GO:0006950);	47 out of 1011 4.648862512364%	888 out of 23596 3.76334972029157%	1
Biological Process: positive regulation of transport (GO:0051050);	5 out of 1011 0.494559841740851%	54 out of 23596 0.228852347855569%	1
Biological Process: cell differentiation involved in kidney development (GO:0061005);	1 out of 1011 0.0989119683481701%	2 out of 23596 0.00847601288353958%	1
Biological Process: monocyte differentiation (GO:0030224);	1 out of 1011 0.0989119683481701%	2 out of 23596 0.00847601288353958%	1
Biological Process: pharyngeal system development (GO:0060037);	1 out of 1011 0.0989119683481701%	2 out of 23596 0.00847601288353958%	1
Biological Process: smoothened signaling pathway involved in dorsal/ventral neural tube patterning (GO:0060831);	1 out of 1011 0.0989119683481701%	2 out of 23596 0.00847601288353958%	1
Biological Process: cell proliferation involved in metanephros development (GO:0072203);	1 out of 1011 0.0989119683481701%	2 out of 23596 0.00847601288353958%	1
Biological Process: mammary gland duct morphogenesis (GO:0060603);	1 out of 1011 0.0989119683481701%	2 out of 23596 0.00847601288353958%	1
Biological Process: neural plate axis specification (GO:0021997);	1 out of 1011 0.0989119683481701%	2 out of 23596 0.00847601288353958%	1
Biological Process: keratinocyte proliferation (GO:0043616);	1 out of 1011 0.0989119683481701%	2 out of 23596 0.00847601288353958%	1
Biological Process: negative regulation of muscle organ development (GO:0048635);	1 out of 1011 0.0989119683481701%	2 out of 23596 0.00847601288353958%	1
Biological Process: positive regulation of growth hormone secretion (GO:0060124);	1 out of 1011 0.0989119683481701%	2 out of 23596 0.00847601288353958%	1
Biological Process: muscle organ morphogenesis (GO:0048644);	1 out of 1011 0.0989119683481701%	2 out of 23596 0.00847601288353958%	1
Biological Process: regulation of cholesterol biosynthetic process (GO:0045540);	1 out of 1011 0.0989119683481701%	2 out of 23596 0.00847601288353958%	1
Biological Process: xanthophyll catabolic process (GO:0016124);	1 out of 1011 0.0989119683481701%	2 out of 23596 0.00847601288353958%	1
Biological Process: midbrain development (GO:0030901);	1 out of 1011 0.0989119683481701%	2 out of 23596 0.00847601288353958%	1
Biological Process: branching involved in ureteric bud morphogenesis (GO:0001658);	1 out of 1011 0.0989119683481701%	2 out of 23596 0.00847601288353958%	1
Biological Process: negative regulation of cell-matrix adhesion (GO:0001953);	1 out of 1011 0.0989119683481701%	2 out of 23596 0.00847601288353958%	1
Biological Process: epoxygenase P450 pathway (GO:0019373);	1 out of 1011 0.0989119683481701%	2 out of 23596 0.00847601288353958%	1
Biological Process: phosphoenolpyruvate-dependent sugar phosphotransferase system (GO:0009401);	1 out of 1011 0.0989119683481701%	2 out of 23596 0.00847601288353958%	1
Biological Process: cyanide catabolic process (GO:0019500);	1 out of 1011 0.0989119683481701%	2 out of 23596 0.00847601288353958%	1
Biological Process: gliogenesis (GO:0042063);	1 out of 1011 0.0989119683481701%	2 out of 23596 0.00847601288353958%	1
Biological Process: UDP metabolic process (GO:0046048);	1 out of 1011 0.0989119683481701%	2 out of 23596 0.00847601288353958%	1
Biological Process: ureide catabolic process (GO:0010136);	1 out of 1011 0.0989119683481701%	2 out of 23596 0.00847601288353958%	1
Biological Process: GDP metabolic process (GO:0046710);	1 out of 1011 0.0989119683481701%	2 out of 23596 0.00847601288353958%	1
Biological Process: hindlimb morphogenesis (GO:0035137);	1 out of 1011 0.0989119683481701%	2 out of 23596 0.00847601288353958%	1
Biological Process: regulation of organ formation (GO:0003156);	1 out of 1011 0.0989119683481701%	2 out of 23596 0.00847601288353958%	1
Biological Process: retinal ganglion cell axon guidance (GO:0031290);	1 out of 1011 0.0989119683481701%	2 out of 23596 0.00847601288353958%	1
Biological Process: membrane lipid metabolic process (GO:0006643);	1 out of 1011 0.0989119683481701%	2 out of 23596 0.00847601288353958%	1
Biological Process: glycerolipid metabolic process (GO:0046486);	1 out of 1011 0.0989119683481701%	2 out of 23596 0.00847601288353958%	1
Biological Process: negative regulation of protein dephosphorylation (GO:0035308);	1 out of 1011 0.0989119683481701%	2 out of 23596 0.00847601288353958%	1
Biological Process: lipid transport (GO:0006869);	9 out of 1011 0.890207715133531%	124 out of 23596 0.525512798779454%	1
Biological Process: developmental growth (GO:0048589);	15 out of 1011 1.48367952522255%	237 out of 23596 1.00440752669944%	1
Biological Process: protein folding (GO:0006457);	27 out of 1011 2.67062314540059%	477 out of 23596 2.02152907272419%	1
Biological Process: transcription from plastid promoter (GO:0042793);	10 out of 1011 0.989119683481701%	143 out of 23596 0.60603492117308%	1
Biological Process: unsaturated fatty acid biosynthetic process (GO:0006636);	13 out of 1011 1.28585558852621%	200 out of 23596 0.847601288353958%	1
Biological Process: mannitol biosynthetic process (GO:0019593);	3 out of 1011 0.29673590504451%	25 out of 23596 0.105950161044245%	1
Biological Process: regulation of cell communication (GO:0010646);	3 out of 1011 0.29673590504451%	25 out of 23596 0.105950161044245%	1
Biological Process: male meiosis cytokinesis (GO:0007112);	2 out of 1011 0.19782393669634%	12 out of 23596 0.0508560773012375%	1
Biological Process: regulation of response to osmotic stress (GO:0047484);	2 out of 1011 0.19782393669634%	12 out of 23596 0.0508560773012375%	1
Biological Process: chaperone mediated protein folding requiring cofactor (GO:0051085);	2 out of 1011 0.19782393669634%	12 out of 23596 0.0508560773012375%	1
Biological Process: carpel morphogenesis (GO:0048445);	2 out of 1011 0.19782393669634%	12 out of 23596 0.0508560773012375%	1
Biological Process: shade avoidance (GO:0009641);	4 out of 1011 0.395647873392681%	41 out of 23596 0.173758264112561%	1
Biological Process: regulation of ion homeostasis (GO:2000021);	3 out of 1011 0.29673590504451%	26 out of 23596 0.110188167486015%	1
Biological Process: G-protein coupled receptor signaling pathway (GO:0007186);	3 out of 1011 0.29673590504451%	26 out of 23596 0.110188167486015%	1
Biological Process: skotomorphogenesis (GO:0009647);	3 out of 1011 0.29673590504451%	26 out of 23596 0.110188167486015%	1
Biological Process: determination of dorsal/ventral asymmetry (GO:0048262);	3 out of 1011 0.29673590504451%	26 out of 23596 0.110188167486015%	1
Biological Process: salicylic acid metabolic process (GO:0009696);	3 out of 1011 0.29673590504451%	26 out of 23596 0.110188167486015%	1
Biological Process: glycolysis (GO:0006096);	28 out of 1011 2.76953511374876%	505 out of 23596 2.14019325309374%	1
Biological Process: pollen sperm cell differentiation (GO:0048235);	5 out of 1011 0.494559841740851%	58 out of 23596 0.245804373622648%	1
Biological Process: cell communication (GO:0007154);	13 out of 1011 1.28585558852621%	205 out of 23596 0.868791320562807%	1
Biological Process: response to lipid (GO:0033993);	8 out of 1011 0.791295746785361%	111 out of 23596 0.470418715036447%	1
Biological Process: basic amino acid transport (GO:0015802);	10 out of 1011 0.989119683481701%	148 out of 23596 0.627224953381929%	1
Biological Process: regulation of nitric oxide metabolic process (GO:0080164);	2 out of 1011 0.19782393669634%	13 out of 23596 0.0550940837430073%	1
Biological Process: positive regulation of protein insertion into mitochondrial membrane involved in apoptotic signaling pathway (GO:1900740);	2 out of 1011 0.19782393669634%	13 out of 23596 0.0550940837430073%	1
Biological Process: developmental maturation (GO:0021700);	2 out of 1011 0.19782393669634%	13 out of 23596 0.0550940837430073%	1
Biological Process: glucose catabolic process (GO:0006007);	14 out of 1011 1.38476755687438%	225 out of 23596 0.953551449398203%	1
Biological Process: short-day photoperiodism, flowering (GO:0048575);	3 out of 1011 0.29673590504451%	27 out of 23596 0.114426173927784%	1
Biological Process: cyanide biosynthetic process (GO:0046202);	3 out of 1011 0.29673590504451%	27 out of 23596 0.114426173927784%	1
Biological Process: nitrile metabolic process (GO:0050898);	3 out of 1011 0.29673590504451%	27 out of 23596 0.114426173927784%	1
Biological Process: microsporocyte differentiation (GO:0010480);	5 out of 1011 0.494559841740851%	59 out of 23596 0.250042380064418%	1
Biological Process: regulation of response to stimulus (GO:0048583);	8 out of 1011 0.791295746785361%	112 out of 23596 0.474656721478217%	1
Biological Process: protein localization to plasma membrane (GO:0072659);	4 out of 1011 0.395647873392681%	43 out of 23596 0.182234276996101%	1
Biological Process: pollen tube growth (GO:0009860);	36 out of 1011 3.56083086053412%	680 out of 23596 2.88184438040346%	1
Biological Process: abscisic acid mediated signaling pathway (GO:0009738);	34 out of 1011 3.36300692383778%	638 out of 23596 2.70384810984913%	1
Biological Process: MAPK cascade (GO:0000165);	32 out of 1011 3.16518298714144%	596 out of 23596 2.5258518392948%	1
Biological Process: developmental cell growth (GO:0048588);	5 out of 1011 0.494559841740851%	60 out of 23596 0.254280386506188%	1
Biological Process: response to ethylene stimulus (GO:0009723);	36 out of 1011 3.56083086053412%	681 out of 23596 2.88608238684523%	1
Biological Process: rhamnogalacturonan I side chain metabolic process (GO:0010400);	3 out of 1011 0.29673590504451%	28 out of 23596 0.118664180369554%	1
Biological Process: sensory organ development (GO:0007423);	3 out of 1011 0.29673590504451%	28 out of 23596 0.118664180369554%	1
Biological Process: fatty acid omega-oxidation (GO:0010430);	3 out of 1011 0.29673590504451%	28 out of 23596 0.118664180369554%	1
Biological Process: cellular lipid metabolic process (GO:0044255);	9 out of 1011 0.890207715133531%	133 out of 23596 0.563654856755382%	1
Biological Process: raffinose family oligosaccharide biosynthetic process (GO:0010325);	4 out of 1011 0.395647873392681%	44 out of 23596 0.186472283437871%	1
Biological Process: cell morphogenesis involved in differentiation (GO:0000904);	4 out of 1011 0.395647873392681%	44 out of 23596 0.186472283437871%	1
Biological Process: sperm individualization (GO:0007291);	2 out of 1011 0.19782393669634%	14 out of 23596 0.0593320901847771%	1
Biological Process: heart looping (GO:0001947);	2 out of 1011 0.19782393669634%	14 out of 23596 0.0593320901847771%	1
Biological Process: sterol esterification (GO:0034434);	2 out of 1011 0.19782393669634%	14 out of 23596 0.0593320901847771%	1
Biological Process: urea transmembrane transport (GO:0071918);	2 out of 1011 0.19782393669634%	14 out of 23596 0.0593320901847771%	1
Biological Process: alkane biosynthetic process (GO:0043447);	2 out of 1011 0.19782393669634%	14 out of 23596 0.0593320901847771%	1
Biological Process: positive regulation of brassinosteroid biosynthetic process (GO:2000488);	2 out of 1011 0.19782393669634%	14 out of 23596 0.0593320901847771%	1
Biological Process: specification of carpel identity (GO:0010094);	2 out of 1011 0.19782393669634%	14 out of 23596 0.0593320901847771%	1
Biological Process: cytokinesis, completion of separation (GO:0007109);	2 out of 1011 0.19782393669634%	14 out of 23596 0.0593320901847771%	1
Biological Process: anastral spindle assembly involved in male meiosis (GO:0009971);	2 out of 1011 0.19782393669634%	14 out of 23596 0.0593320901847771%	1
Biological Process: establishment of mitotic spindle orientation (GO:0000132);	2 out of 1011 0.19782393669634%	14 out of 23596 0.0593320901847771%	1
Biological Process: sterol catabolic process (GO:0016127);	2 out of 1011 0.19782393669634%	14 out of 23596 0.0593320901847771%	1
Biological Process: cell wall modification involved in abscission (GO:0009830);	5 out of 1011 0.494559841740851%	61 out of 23596 0.258518392947957%	1
Biological Process: cell growth (GO:0016049);	27 out of 1011 2.67062314540059%	496 out of 23596 2.10205119511782%	1
Biological Process: response to mechanical stimulus (GO:0009612);	10 out of 1011 0.989119683481701%	153 out of 23596 0.648414985590778%	1
Biological Process: regulation of cellular macromolecule biosynthetic process (GO:2000112);	6 out of 1011 0.593471810089021%	79 out of 23596 0.334802508899814%	1
Biological Process: cellular response to phosphate starvation (GO:0016036);	20 out of 1011 1.9782393669634%	352 out of 23596 1.49177826750297%	1
Biological Process: fungal-type cell wall biogenesis (GO:0009272);	1 out of 1011 0.0989119683481701%	3 out of 23596 0.0127140193253094%	1
Biological Process: microtubule organizing center organization (GO:0031023);	1 out of 1011 0.0989119683481701%	3 out of 23596 0.0127140193253094%	1
Biological Process: methylammonium transmembrane transport (GO:0072489);	1 out of 1011 0.0989119683481701%	3 out of 23596 0.0127140193253094%	1
Biological Process: oxygen transport (GO:0015671);	1 out of 1011 0.0989119683481701%	3 out of 23596 0.0127140193253094%	1
Biological Process: methionyl-tRNA aminoacylation (GO:0006431);	1 out of 1011 0.0989119683481701%	3 out of 23596 0.0127140193253094%	1
Biological Process: histone H4-K20 demethylation (GO:0035574);	1 out of 1011 0.0989119683481701%	3 out of 23596 0.0127140193253094%	1
Biological Process: cardioblast differentiation (GO:0010002);	1 out of 1011 0.0989119683481701%	3 out of 23596 0.0127140193253094%	1
Biological Process: cellular response to gibberellin stimulus (GO:0071370);	1 out of 1011 0.0989119683481701%	3 out of 23596 0.0127140193253094%	1
Biological Process: tRNA aminoacylation (GO:0043039);	1 out of 1011 0.0989119683481701%	3 out of 23596 0.0127140193253094%	1
Biological Process: regulation of gibberellic acid mediated signaling pathway (GO:0009937);	1 out of 1011 0.0989119683481701%	3 out of 23596 0.0127140193253094%	1
Biological Process: negative regulation of antimicrobial humoral response (GO:0008348);	1 out of 1011 0.0989119683481701%	3 out of 23596 0.0127140193253094%	1
Biological Process: embryonic limb morphogenesis (GO:0030326);	1 out of 1011 0.0989119683481701%	3 out of 23596 0.0127140193253094%	1
Biological Process: negative regulation of chromatin silencing at rDNA (GO:0061188);	1 out of 1011 0.0989119683481701%	3 out of 23596 0.0127140193253094%	1
Biological Process: porphyrin-containing compound metabolic process (GO:0006778);	1 out of 1011 0.0989119683481701%	3 out of 23596 0.0127140193253094%	1
Biological Process: oxylipin metabolic process (GO:0031407);	1 out of 1011 0.0989119683481701%	3 out of 23596 0.0127140193253094%	1
Biological Process: muscle cell homeostasis (GO:0046716);	1 out of 1011 0.0989119683481701%	3 out of 23596 0.0127140193253094%	1
Biological Process: pyrimidine nucleobase biosynthetic process (GO:0019856);	1 out of 1011 0.0989119683481701%	3 out of 23596 0.0127140193253094%	1
Biological Process: sebaceous gland cell differentiation (GO:0001949);	1 out of 1011 0.0989119683481701%	3 out of 23596 0.0127140193253094%	1
Biological Process: negative regulation of phosphoprotein phosphatase activity (GO:0032515);	1 out of 1011 0.0989119683481701%	3 out of 23596 0.0127140193253094%	1
Biological Process: phosphatidylserine biosynthetic process (GO:0006659);	1 out of 1011 0.0989119683481701%	3 out of 23596 0.0127140193253094%	1
Biological Process: negative regulation of mitotic metaphase/anaphase transition (GO:0045841);	1 out of 1011 0.0989119683481701%	3 out of 23596 0.0127140193253094%	1
Biological Process: positive regulation of anoikis (GO:2000210);	1 out of 1011 0.0989119683481701%	3 out of 23596 0.0127140193253094%	1
Biological Process: establishment of chromosome localization (GO:0051303);	1 out of 1011 0.0989119683481701%	3 out of 23596 0.0127140193253094%	1
Biological Process: cellular protein catabolic process (GO:0044257);	1 out of 1011 0.0989119683481701%	3 out of 23596 0.0127140193253094%	1
Biological Process: mammary gland epithelial cell differentiation (GO:0060644);	1 out of 1011 0.0989119683481701%	3 out of 23596 0.0127140193253094%	1
Biological Process: response to chlorate (GO:0010157);	1 out of 1011 0.0989119683481701%	3 out of 23596 0.0127140193253094%	1
Biological Process: lignin catabolic process (GO:0046274);	4 out of 1011 0.395647873392681%	45 out of 23596 0.190710289879641%	1
Biological Process: protein polymerization (GO:0051258);	4 out of 1011 0.395647873392681%	45 out of 23596 0.190710289879641%	1
Biological Process: multicellular organismal reproductive process (GO:0048609);	3 out of 1011 0.29673590504451%	29 out of 23596 0.122902186811324%	1
Biological Process: auxin metabolic process (GO:0009850);	5 out of 1011 0.494559841740851%	62 out of 23596 0.262756399389727%	1
Biological Process: jasmonic acid mediated signaling pathway (GO:0009867);	42 out of 1011 4.15430267062315%	816 out of 23596 3.45821325648415%	1
Biological Process: jasmonic acid metabolic process (GO:0009694);	7 out of 1011 0.692383778437191%	99 out of 23596 0.419562637735209%	1
Biological Process: respiratory burst involved in defense response (GO:0002679);	23 out of 1011 2.27497527200791%	418 out of 23596 1.77148669265977%	1
Biological Process: malate transport (GO:0015743);	2 out of 1011 0.19782393669634%	15 out of 23596 0.0635700966265469%	1
Biological Process: glycoside catabolic process (GO:0016139);	2 out of 1011 0.19782393669634%	15 out of 23596 0.0635700966265469%	1
Biological Process: tropism (GO:0009606);	2 out of 1011 0.19782393669634%	15 out of 23596 0.0635700966265469%	1
Biological Process: regulation of protein homodimerization activity (GO:0043496);	2 out of 1011 0.19782393669634%	15 out of 23596 0.0635700966265469%	1
Biological Process: mitotic centrosome separation (GO:0007100);	2 out of 1011 0.19782393669634%	15 out of 23596 0.0635700966265469%	1
Biological Process: thiamine biosynthetic process (GO:0009228);	2 out of 1011 0.19782393669634%	15 out of 23596 0.0635700966265469%	1
Biological Process: seed dormancy process (GO:0010162);	17 out of 1011 1.68150346191889%	295 out of 23596 1.25021190032209%	1
Biological Process: methylation (GO:0032259);	16 out of 1011 1.58259149357072%	275 out of 23596 1.16545177148669%	1
Biological Process: adventitious root development (GO:0048830);	3 out of 1011 0.29673590504451%	30 out of 23596 0.127140193253094%	1
Biological Process: fatty acid catabolic process (GO:0009062);	10 out of 1011 0.989119683481701%	157 out of 23596 0.665367011357857%	1
Biological Process: polysaccharide catabolic process (GO:0000272);	10 out of 1011 0.989119683481701%	157 out of 23596 0.665367011357857%	1
Biological Process: leaf morphogenesis (GO:0009965);	29 out of 1011 2.86844708209693%	546 out of 23596 2.31395151720631%	1
Biological Process: gametophyte development (GO:0048229);	9 out of 1011 0.890207715133531%	138 out of 23596 0.584844888964231%	1
Biological Process: amino acid transmembrane transport (GO:0003333);	5 out of 1011 0.494559841740851%	64 out of 23596 0.271232412273267%	1
Biological Process: response to brassinosteroid stimulus (GO:0009741);	13 out of 1011 1.28585558852621%	217 out of 23596 0.919647397864045%	1
Biological Process: monovalent inorganic cation transport (GO:0015672);	4 out of 1011 0.395647873392681%	47 out of 23596 0.19918630276318%	1
Biological Process: chloroplast relocation (GO:0009902);	13 out of 1011 1.28585558852621%	218 out of 23596 0.923885404305815%	1
Biological Process: electron transport chain (GO:0022900);	10 out of 1011 0.989119683481701%	159 out of 23596 0.673843024241397%	1
Biological Process: formation of organ boundary (GO:0010160);	3 out of 1011 0.29673590504451%	31 out of 23596 0.131378199694864%	1
Biological Process: regulation of molecular function (GO:0065009);	3 out of 1011 0.29673590504451%	31 out of 23596 0.131378199694864%	1
Biological Process: salivary gland cell autophagic cell death (GO:0035071);	2 out of 1011 0.19782393669634%	16 out of 23596 0.0678081030683167%	1
Biological Process: oxidative photosynthetic carbon pathway (GO:0009854);	2 out of 1011 0.19782393669634%	16 out of 23596 0.0678081030683167%	1
Biological Process: regulation of photoperiodism, flowering (GO:2000028);	2 out of 1011 0.19782393669634%	16 out of 23596 0.0678081030683167%	1
Biological Process: neurotransmitter secretion (GO:0007269);	2 out of 1011 0.19782393669634%	16 out of 23596 0.0678081030683167%	1
Biological Process: mitochondrial respiratory chain complex I assembly (GO:0032981);	2 out of 1011 0.19782393669634%	16 out of 23596 0.0678081030683167%	1
Biological Process: carbon utilization (GO:0015976);	2 out of 1011 0.19782393669634%	16 out of 23596 0.0678081030683167%	1
Biological Process: nitric oxide biosynthetic process (GO:0006809);	2 out of 1011 0.19782393669634%	16 out of 23596 0.0678081030683167%	1
Biological Process: response to abiotic stimulus (GO:0009628);	30 out of 1011 2.9673590504451%	572 out of 23596 2.42413968469232%	1
Biological Process: cell differentiation (GO:0030154);	30 out of 1011 2.9673590504451%	572 out of 23596 2.42413968469232%	1
Biological Process: recognition of pollen (GO:0048544);	4 out of 1011 0.395647873392681%	48 out of 23596 0.20342430920495%	1
Biological Process: trehalose biosynthetic process (GO:0005992);	4 out of 1011 0.395647873392681%	48 out of 23596 0.20342430920495%	1
Biological Process: anthocyanin-containing compound biosynthetic process (GO:0009718);	12 out of 1011 1.18694362017804%	200 out of 23596 0.847601288353958%	1
Biological Process: cellular response to ethylene stimulus (GO:0071369);	5 out of 1011 0.494559841740851%	66 out of 23596 0.279708425156806%	1
Biological Process: wax biosynthetic process (GO:0010025);	6 out of 1011 0.593471810089021%	85 out of 23596 0.360230547550432%	1
Biological Process: positive regulation of biological process (GO:0048518);	11 out of 1011 1.08803165182987%	182 out of 23596 0.771317172402102%	1
Biological Process: vitamin B6 biosynthetic process (GO:0042819);	1 out of 1011 0.0989119683481701%	4 out of 23596 0.0169520257670792%	1
Biological Process: galactomannan catabolic process (GO:0051682);	1 out of 1011 0.0989119683481701%	4 out of 23596 0.0169520257670792%	1
Biological Process: negative regulation of RNA polymerase II transcriptional preinitiation complex assembly (GO:0017055);	1 out of 1011 0.0989119683481701%	4 out of 23596 0.0169520257670792%	1
Biological Process: response to water stimulus (GO:0009415);	1 out of 1011 0.0989119683481701%	4 out of 23596 0.0169520257670792%	1
Biological Process: spinal cord motor neuron differentiation (GO:0021522);	1 out of 1011 0.0989119683481701%	4 out of 23596 0.0169520257670792%	1
Biological Process: regulation of fatty acid metabolic process (GO:0019217);	1 out of 1011 0.0989119683481701%	4 out of 23596 0.0169520257670792%	1
Biological Process: positive regulation of phosphoprotein phosphatase activity (GO:0032516);	1 out of 1011 0.0989119683481701%	4 out of 23596 0.0169520257670792%	1
Biological Process: ovary septum development (GO:0080126);	1 out of 1011 0.0989119683481701%	4 out of 23596 0.0169520257670792%	1
Biological Process: auxin transport (GO:0060918);	1 out of 1011 0.0989119683481701%	4 out of 23596 0.0169520257670792%	1
Biological Process: positive regulation of cholesterol efflux (GO:0010875);	1 out of 1011 0.0989119683481701%	4 out of 23596 0.0169520257670792%	1
Biological Process: regulation of myotube differentiation (GO:0010830);	1 out of 1011 0.0989119683481701%	4 out of 23596 0.0169520257670792%	1
Biological Process: glycoprotein metabolic process (GO:0009100);	1 out of 1011 0.0989119683481701%	4 out of 23596 0.0169520257670792%	1
Biological Process: positive regulation of chromosome segregation (GO:0051984);	1 out of 1011 0.0989119683481701%	4 out of 23596 0.0169520257670792%	1
Biological Process: hatching behavior (GO:0035187);	1 out of 1011 0.0989119683481701%	4 out of 23596 0.0169520257670792%	1
Biological Process: regulation of hair cycle (GO:0042634);	1 out of 1011 0.0989119683481701%	4 out of 23596 0.0169520257670792%	1
Biological Process: allantoin catabolic process (GO:0000256);	1 out of 1011 0.0989119683481701%	4 out of 23596 0.0169520257670792%	1
Biological Process: atrial cardiac muscle tissue development (GO:0003228);	1 out of 1011 0.0989119683481701%	4 out of 23596 0.0169520257670792%	1
Biological Process: ceramide catabolic process (GO:0046514);	1 out of 1011 0.0989119683481701%	4 out of 23596 0.0169520257670792%	1
Biological Process: embryonic viscerocranium morphogenesis (GO:0048703);	1 out of 1011 0.0989119683481701%	4 out of 23596 0.0169520257670792%	1
Biological Process: nicotianamine biosynthetic process (GO:0030418);	1 out of 1011 0.0989119683481701%	4 out of 23596 0.0169520257670792%	1
Biological Process: carotene catabolic process (GO:0016121);	1 out of 1011 0.0989119683481701%	4 out of 23596 0.0169520257670792%	1
Biological Process: histone H3-K27 demethylation (GO:0071557);	1 out of 1011 0.0989119683481701%	4 out of 23596 0.0169520257670792%	1
Biological Process: prostaglandin production involved in inflammatory response (GO:0002539);	1 out of 1011 0.0989119683481701%	4 out of 23596 0.0169520257670792%	1
Biological Process: tRNA wobble adenosine to inosine editing (GO:0002100);	1 out of 1011 0.0989119683481701%	4 out of 23596 0.0169520257670792%	1
Biological Process: hemostasis (GO:0007599);	1 out of 1011 0.0989119683481701%	4 out of 23596 0.0169520257670792%	1
Biological Process: cyanate catabolic process (GO:0009440);	1 out of 1011 0.0989119683481701%	4 out of 23596 0.0169520257670792%	1
Biological Process: rhamnogalacturonan I biosynthetic process (GO:0010246);	1 out of 1011 0.0989119683481701%	4 out of 23596 0.0169520257670792%	1
Biological Process: cellular hormone metabolic process (GO:0034754);	1 out of 1011 0.0989119683481701%	4 out of 23596 0.0169520257670792%	1
Biological Process: inositol biosynthetic process (GO:0006021);	1 out of 1011 0.0989119683481701%	4 out of 23596 0.0169520257670792%	1
Biological Process: negative regulation of megakaryocyte differentiation (GO:0045653);	1 out of 1011 0.0989119683481701%	4 out of 23596 0.0169520257670792%	1
Biological Process: pyrimidine nucleoside transport (GO:0015864);	1 out of 1011 0.0989119683481701%	4 out of 23596 0.0169520257670792%	1
Biological Process: Actinobacterium-type cell wall biogenesis (GO:0071766);	1 out of 1011 0.0989119683481701%	4 out of 23596 0.0169520257670792%	1
Biological Process: sexual sporulation resulting in formation of a cellular spore (GO:0043935);	1 out of 1011 0.0989119683481701%	4 out of 23596 0.0169520257670792%	1
Biological Process: photosystem II stabilization (GO:0042549);	1 out of 1011 0.0989119683481701%	4 out of 23596 0.0169520257670792%	1
Biological Process: allantoin assimilation pathway (GO:0009442);	1 out of 1011 0.0989119683481701%	4 out of 23596 0.0169520257670792%	1
Biological Process: capsule polysaccharide biosynthetic process (GO:0045227);	1 out of 1011 0.0989119683481701%	4 out of 23596 0.0169520257670792%	1
Biological Process: UDP-L-arabinose biosynthetic process (GO:0033358);	1 out of 1011 0.0989119683481701%	4 out of 23596 0.0169520257670792%	1
Biological Process: photosystem II oxygen evolving complex assembly (GO:0010270);	1 out of 1011 0.0989119683481701%	4 out of 23596 0.0169520257670792%	1
Biological Process: reproductive process (GO:0022414);	6 out of 1011 0.593471810089021%	86 out of 23596 0.364468553992202%	1
Biological Process: camera-type eye development (GO:0043010);	2 out of 1011 0.19782393669634%	17 out of 23596 0.0720461095100865%	1
Biological Process: establishment of protein localization to membrane (GO:0090150);	2 out of 1011 0.19782393669634%	17 out of 23596 0.0720461095100865%	1
Biological Process: regulation of MAP kinase activity (GO:0043405);	2 out of 1011 0.19782393669634%	17 out of 23596 0.0720461095100865%	1
Biological Process: actin filament bundle assembly (GO:0051017);	2 out of 1011 0.19782393669634%	17 out of 23596 0.0720461095100865%	1
Biological Process: engulfment of apoptotic cell (GO:0043652);	2 out of 1011 0.19782393669634%	17 out of 23596 0.0720461095100865%	1
Biological Process: selenate transport (GO:0080160);	2 out of 1011 0.19782393669634%	17 out of 23596 0.0720461095100865%	1
Biological Process: photosystem II repair (GO:0010206);	2 out of 1011 0.19782393669634%	17 out of 23596 0.0720461095100865%	1
Biological Process: isoflavonoid biosynthetic process (GO:0009717);	2 out of 1011 0.19782393669634%	17 out of 23596 0.0720461095100865%	1
Biological Process: transmembrane receptor protein serine/threonine kinase signaling pathway (GO:0007178);	2 out of 1011 0.19782393669634%	17 out of 23596 0.0720461095100865%	1
Biological Process: organelle localization (GO:0051640);	2 out of 1011 0.19782393669634%	17 out of 23596 0.0720461095100865%	1
Biological Process: regulation of cardiac muscle cell contraction (GO:0086004);	2 out of 1011 0.19782393669634%	17 out of 23596 0.0720461095100865%	1
Biological Process: positive gravitropism (GO:0009958);	7 out of 1011 0.692383778437191%	105 out of 23596 0.444990676385828%	1
Biological Process: calcium ion transport (GO:0006816);	18 out of 1011 1.78041543026706%	326 out of 23596 1.38159010001695%	1
Biological Process: negative regulation of photomorphogenesis (GO:0010100);	4 out of 1011 0.395647873392681%	50 out of 23596 0.21190032208849%	1
Biological Process: seed coat development (GO:0010214);	4 out of 1011 0.395647873392681%	50 out of 23596 0.21190032208849%	1
Biological Process: callose deposition in cell wall (GO:0052543);	5 out of 1011 0.494559841740851%	68 out of 23596 0.288184438040346%	1
Biological Process: carbohydrate catabolic process (GO:0016052);	3 out of 1011 0.29673590504451%	33 out of 23596 0.139854212578403%	1
Biological Process: cellular modified amino acid biosynthetic process (GO:0042398);	11 out of 1011 1.08803165182987%	184 out of 23596 0.779793185285642%	1
Biological Process: nitrogen compound transport (GO:0071705);	6 out of 1011 0.593471810089021%	87 out of 23596 0.368706560433972%	1
Biological Process: cellular response to organic substance (GO:0071310);	15 out of 1011 1.48367952522255%	266 out of 23596 1.12730971351076%	1
Biological Process: response to UV-B (GO:0010224);	23 out of 1011 2.27497527200791%	434 out of 23596 1.83929479572809%	1
Biological Process: double fertilization forming a zygote and endosperm (GO:0009567);	4 out of 1011 0.395647873392681%	51 out of 23596 0.216138328530259%	1
Biological Process: carboxylic acid biosynthetic process (GO:0046394);	4 out of 1011 0.395647873392681%	51 out of 23596 0.216138328530259%	1
Biological Process: neurological system process (GO:0050877);	4 out of 1011 0.395647873392681%	51 out of 23596 0.216138328530259%	1
Biological Process: regulation of anatomical structure morphogenesis (GO:0022603);	3 out of 1011 0.29673590504451%	34 out of 23596 0.144092219020173%	1
Biological Process: cellular response to amino acid stimulus (GO:0071230);	2 out of 1011 0.19782393669634%	18 out of 23596 0.0762841159518562%	1
Biological Process: pronuclear migration (GO:0035046);	2 out of 1011 0.19782393669634%	18 out of 23596 0.0762841159518562%	1
Biological Process: protein retention in ER lumen (GO:0006621);	2 out of 1011 0.19782393669634%	18 out of 23596 0.0762841159518562%	1
Biological Process: fruit ripening, climacteric (GO:0009836);	2 out of 1011 0.19782393669634%	18 out of 23596 0.0762841159518562%	1
Biological Process: high-affinity iron ion transport (GO:0006827);	2 out of 1011 0.19782393669634%	18 out of 23596 0.0762841159518562%	1
Biological Process: regulation of protein metabolic process (GO:0051246);	2 out of 1011 0.19782393669634%	18 out of 23596 0.0762841159518562%	1
Biological Process: determination of left/right symmetry (GO:0007368);	2 out of 1011 0.19782393669634%	18 out of 23596 0.0762841159518562%	1
Biological Process: leaf shaping (GO:0010358);	2 out of 1011 0.19782393669634%	18 out of 23596 0.0762841159518562%	1
Biological Process: ionotropic glutamate receptor signaling pathway (GO:0035235);	2 out of 1011 0.19782393669634%	18 out of 23596 0.0762841159518562%	1
Biological Process: purine nucleobase transport (GO:0006863);	11 out of 1011 1.08803165182987%	187 out of 23596 0.792507204610951%	1
Biological Process: shoot morphogenesis (GO:0010016);	11 out of 1011 1.08803165182987%	187 out of 23596 0.792507204610951%	1
Biological Process: cellular response to nitric oxide (GO:0071732);	5 out of 1011 0.494559841740851%	70 out of 23596 0.296660450923885%	1
Biological Process: macromolecule methylation (GO:0043414);	5 out of 1011 0.494559841740851%	70 out of 23596 0.296660450923885%	1
Biological Process: virus-host interaction (GO:0019048);	5 out of 1011 0.494559841740851%	70 out of 23596 0.296660450923885%	1
Biological Process: response to organic cyclic compound (GO:0014070);	7 out of 1011 0.692383778437191%	108 out of 23596 0.457704695711137%	1
Biological Process: pollen tube guidance (GO:0010183);	5 out of 1011 0.494559841740851%	71 out of 23596 0.300898457365655%	1
Biological Process: ammonium transport (GO:0015696);	9 out of 1011 0.890207715133531%	149 out of 23596 0.631462959823699%	1
Biological Process: autophagy (GO:0006914);	7 out of 1011 0.692383778437191%	110 out of 23596 0.466180708594677%	1
Biological Process: locomotory behavior (GO:0007626);	2 out of 1011 0.19782393669634%	19 out of 23596 0.080522122393626%	1
Biological Process: cell differentiation in spinal cord (GO:0021515);	2 out of 1011 0.19782393669634%	19 out of 23596 0.080522122393626%	1
Biological Process: acropetal auxin transport (GO:0010541);	2 out of 1011 0.19782393669634%	19 out of 23596 0.080522122393626%	1
Biological Process: canalicular bile acid transport (GO:0015722);	2 out of 1011 0.19782393669634%	19 out of 23596 0.080522122393626%	1
Biological Process: phosphorylation of RNA polymerase II C-terminal domain (GO:0070816);	2 out of 1011 0.19782393669634%	19 out of 23596 0.080522122393626%	1
Biological Process: epithelial cell differentiation (GO:0030855);	2 out of 1011 0.19782393669634%	19 out of 23596 0.080522122393626%	1
Biological Process: negative regulation of anoikis (GO:2000811);	1 out of 1011 0.0989119683481701%	5 out of 23596 0.021190032208849%	1
Biological Process: neural crest cell development (GO:0014032);	1 out of 1011 0.0989119683481701%	5 out of 23596 0.021190032208849%	1
Biological Process: positive regulation of blood pressure (GO:0045777);	1 out of 1011 0.0989119683481701%	5 out of 23596 0.021190032208849%	1
Biological Process: negative regulation of nitric oxide biosynthetic process (GO:0045019);	1 out of 1011 0.0989119683481701%	5 out of 23596 0.021190032208849%	1
Biological Process: microtubule-based transport (GO:0010970);	1 out of 1011 0.0989119683481701%	5 out of 23596 0.021190032208849%	1
Biological Process: cAMP-mediated signaling (GO:0019933);	1 out of 1011 0.0989119683481701%	5 out of 23596 0.021190032208849%	1
Biological Process: detoxification of nitrogen compound (GO:0051410);	1 out of 1011 0.0989119683481701%	5 out of 23596 0.021190032208849%	1
Biological Process: activation of ARF GTPase activity (GO:0032857);	1 out of 1011 0.0989119683481701%	5 out of 23596 0.021190032208849%	1
Biological Process: thiamine diphosphate biosynthetic process (GO:0009229);	1 out of 1011 0.0989119683481701%	5 out of 23596 0.021190032208849%	1
Biological Process: glucosinolate biosynthetic process from homomethionine (GO:0033506);	1 out of 1011 0.0989119683481701%	5 out of 23596 0.021190032208849%	1
Biological Process: somite development (GO:0061053);	1 out of 1011 0.0989119683481701%	5 out of 23596 0.021190032208849%	1
Biological Process: positive regulation of intracellular protein transport (GO:0090316);	1 out of 1011 0.0989119683481701%	5 out of 23596 0.021190032208849%	1
Biological Process: N-acetylglucosamine metabolic process (GO:0006044);	1 out of 1011 0.0989119683481701%	5 out of 23596 0.021190032208849%	1
Biological Process: negative regulation of cytokinin mediated signaling pathway (GO:0080037);	1 out of 1011 0.0989119683481701%	5 out of 23596 0.021190032208849%	1
Biological Process: molybdopterin cofactor metabolic process (GO:0043545);	1 out of 1011 0.0989119683481701%	5 out of 23596 0.021190032208849%	1
Biological Process: linoleic acid metabolic process (GO:0043651);	1 out of 1011 0.0989119683481701%	5 out of 23596 0.021190032208849%	1
Biological Process: ureter maturation (GO:0035799);	1 out of 1011 0.0989119683481701%	5 out of 23596 0.021190032208849%	1
Biological Process: ammonia assimilation cycle (GO:0019676);	1 out of 1011 0.0989119683481701%	5 out of 23596 0.021190032208849%	1
Biological Process: negative regulation of epithelial cell proliferation (GO:0050680);	1 out of 1011 0.0989119683481701%	5 out of 23596 0.021190032208849%	1
Biological Process: actin rod assembly (GO:0031247);	1 out of 1011 0.0989119683481701%	5 out of 23596 0.021190032208849%	1
Biological Process: apical cell fate commitment (GO:0010654);	1 out of 1011 0.0989119683481701%	5 out of 23596 0.021190032208849%	1
Biological Process: protein complex disassembly (GO:0043241);	1 out of 1011 0.0989119683481701%	5 out of 23596 0.021190032208849%	1
Biological Process: NAD(P)H dehydrogenase complex assembly (GO:0010275);	1 out of 1011 0.0989119683481701%	5 out of 23596 0.021190032208849%	1
Biological Process: homologous chromosome segregation (GO:0045143);	1 out of 1011 0.0989119683481701%	5 out of 23596 0.021190032208849%	1
Biological Process: stilbene catabolic process (GO:0046272);	1 out of 1011 0.0989119683481701%	5 out of 23596 0.021190032208849%	1
Biological Process: synaptic vesicle fusion to presynaptic membrane (GO:0031629);	1 out of 1011 0.0989119683481701%	5 out of 23596 0.021190032208849%	1
Biological Process: central nervous system myelin maintenance (GO:0032286);	1 out of 1011 0.0989119683481701%	5 out of 23596 0.021190032208849%	1
Biological Process: retinoic acid receptor signaling pathway (GO:0048384);	1 out of 1011 0.0989119683481701%	5 out of 23596 0.021190032208849%	1
Biological Process: leucine metabolic process (GO:0006551);	1 out of 1011 0.0989119683481701%	5 out of 23596 0.021190032208849%	1
Biological Process: regulation of endothelial cell proliferation (GO:0001936);	1 out of 1011 0.0989119683481701%	5 out of 23596 0.021190032208849%	1
Biological Process: 9-cis-retinoic acid biosynthetic process (GO:0042904);	1 out of 1011 0.0989119683481701%	5 out of 23596 0.021190032208849%	1
Biological Process: carpel formation (GO:0048462);	1 out of 1011 0.0989119683481701%	5 out of 23596 0.021190032208849%	1
Biological Process: positive regulation of actin filament depolymerization (GO:0030836);	1 out of 1011 0.0989119683481701%	5 out of 23596 0.021190032208849%	1
Biological Process: thigmotropism (GO:0009652);	1 out of 1011 0.0989119683481701%	5 out of 23596 0.021190032208849%	1
Biological Process: organ development (GO:0048513);	25 out of 1011 2.47279920870425%	485 out of 23596 2.05543312425835%	1
Biological Process: filamentous growth of a population of unicellular organisms in response to starvation (GO:0036170);	3 out of 1011 0.29673590504451%	36 out of 23596 0.152568231903712%	1
Biological Process: filamentous growth of a population of unicellular organisms (GO:0044182);	3 out of 1011 0.29673590504451%	36 out of 23596 0.152568231903712%	1
Biological Process: cellular response to organic cyclic compound (GO:0071407);	3 out of 1011 0.29673590504451%	36 out of 23596 0.152568231903712%	1
Biological Process: response to calcium ion (GO:0051592);	3 out of 1011 0.29673590504451%	36 out of 23596 0.152568231903712%	1
Biological Process: anatomical structure formation involved in morphogenesis (GO:0048646);	12 out of 1011 1.18694362017804%	212 out of 23596 0.898457365655196%	1
Biological Process: defense response to insect (GO:0002213);	6 out of 1011 0.593471810089021%	92 out of 23596 0.389896592642821%	1
Biological Process: isopentenyl diphosphate biosynthetic process, mevalonate-independent pathway (GO:0019288);	25 out of 1011 2.47279920870425%	488 out of 23596 2.06814714358366%	1
Biological Process: cellular component assembly (GO:0022607);	6 out of 1011 0.593471810089021%	93 out of 23596 0.394134599084591%	1
Biological Process: response to carbon dioxide (GO:0010037);	3 out of 1011 0.29673590504451%	37 out of 23596 0.156806238345482%	1
Biological Process: somatic embryogenesis (GO:0010262);	2 out of 1011 0.19782393669634%	20 out of 23596 0.0847601288353958%	1
Biological Process: icosanoid metabolic process (GO:0006690);	2 out of 1011 0.19782393669634%	20 out of 23596 0.0847601288353958%	1
Biological Process: neuron projection morphogenesis (GO:0048812);	2 out of 1011 0.19782393669634%	20 out of 23596 0.0847601288353958%	1
Biological Process: monosaccharide transport (GO:0015749);	2 out of 1011 0.19782393669634%	20 out of 23596 0.0847601288353958%	1
Biological Process: low affinity nitrate transport (GO:0080055);	2 out of 1011 0.19782393669634%	20 out of 23596 0.0847601288353958%	1
Biological Process: cellular protein localization (GO:0034613);	5 out of 1011 0.494559841740851%	74 out of 23596 0.313612476690965%	1
Biological Process: cellular calcium ion homeostasis (GO:0006874);	5 out of 1011 0.494559841740851%	74 out of 23596 0.313612476690965%	1
Biological Process: macromolecule modification (GO:0043412);	7 out of 1011 0.692383778437191%	113 out of 23596 0.478894727919986%	1
Biological Process: anion transport (GO:0006820);	6 out of 1011 0.593471810089021%	94 out of 23596 0.39837260552636%	1
Biological Process: jasmonic acid biosynthetic process (GO:0009695);	17 out of 1011 1.68150346191889%	322 out of 23596 1.36463807424987%	1
Biological Process: circadian rhythm (GO:0007623);	17 out of 1011 1.68150346191889%	322 out of 23596 1.36463807424987%	1
Biological Process: neutral amino acid transport (GO:0015804);	3 out of 1011 0.29673590504451%	38 out of 23596 0.161044244787252%	1
Biological Process: regulation of mitosis (GO:0007088);	3 out of 1011 0.29673590504451%	38 out of 23596 0.161044244787252%	1
Biological Process: response to organic nitrogen (GO:0010243);	3 out of 1011 0.29673590504451%	38 out of 23596 0.161044244787252%	1
Biological Process: cell plate assembly (GO:0000919);	3 out of 1011 0.29673590504451%	38 out of 23596 0.161044244787252%	1
Biological Process: regulation of biological process (GO:0050789);	19 out of 1011 1.87932739861523%	365 out of 23596 1.54687235124597%	1
Biological Process: establishment of protein localization (GO:0045184);	2 out of 1011 0.19782393669634%	21 out of 23596 0.0889981352771656%	1
Biological Process: positive regulation of T-helper cell differentiation (GO:0045624);	2 out of 1011 0.19782393669634%	21 out of 23596 0.0889981352771656%	1
Biological Process: cGMP biosynthetic process (GO:0006182);	2 out of 1011 0.19782393669634%	21 out of 23596 0.0889981352771656%	1
Biological Process: anterior/posterior pattern specification (GO:0009952);	2 out of 1011 0.19782393669634%	21 out of 23596 0.0889981352771656%	1
Biological Process: fruit ripening (GO:0009835);	2 out of 1011 0.19782393669634%	21 out of 23596 0.0889981352771656%	1
Biological Process: histone H3-K4 methylation (GO:0051568);	4 out of 1011 0.395647873392681%	57 out of 23596 0.241566367180878%	1
Biological Process: very long-chain fatty acid biosynthetic process (GO:0042761);	4 out of 1011 0.395647873392681%	57 out of 23596 0.241566367180878%	1
Biological Process: embryonic forelimb morphogenesis (GO:0035115);	1 out of 1011 0.0989119683481701%	6 out of 23596 0.0254280386506187%	1
Biological Process: UDP-N-acetylglucosamine biosynthetic process (GO:0006048);	1 out of 1011 0.0989119683481701%	6 out of 23596 0.0254280386506187%	1
Biological Process: cellular response to ATP (GO:0071318);	1 out of 1011 0.0989119683481701%	6 out of 23596 0.0254280386506187%	1
Biological Process: small molecule catabolic process (GO:0044282);	1 out of 1011 0.0989119683481701%	6 out of 23596 0.0254280386506187%	1
Biological Process: long-distance posttranscriptional gene silencing (GO:0010495);	1 out of 1011 0.0989119683481701%	6 out of 23596 0.0254280386506187%	1
Biological Process: valine biosynthetic process (GO:0009099);	1 out of 1011 0.0989119683481701%	6 out of 23596 0.0254280386506187%	1
Biological Process: embryonic camera-type eye development (GO:0031076);	1 out of 1011 0.0989119683481701%	6 out of 23596 0.0254280386506187%	1
Biological Process: sensory perception of pain (GO:0019233);	1 out of 1011 0.0989119683481701%	6 out of 23596 0.0254280386506187%	1
Biological Process: limb development (GO:0060173);	1 out of 1011 0.0989119683481701%	6 out of 23596 0.0254280386506187%	1
Biological Process: maltose biosynthetic process (GO:0000024);	1 out of 1011 0.0989119683481701%	6 out of 23596 0.0254280386506187%	1
Biological Process: neuron homeostasis (GO:0070050);	1 out of 1011 0.0989119683481701%	6 out of 23596 0.0254280386506187%	1
Biological Process: transepithelial transport (GO:0070633);	1 out of 1011 0.0989119683481701%	6 out of 23596 0.0254280386506187%	1
Biological Process: L-lysine catabolic process (GO:0019477);	1 out of 1011 0.0989119683481701%	6 out of 23596 0.0254280386506187%	1
Biological Process: sphingosine biosynthetic process (GO:0046512);	1 out of 1011 0.0989119683481701%	6 out of 23596 0.0254280386506187%	1
Biological Process: glutathione transmembrane transport (GO:0034775);	1 out of 1011 0.0989119683481701%	6 out of 23596 0.0254280386506187%	1
Biological Process: 1-deoxy-D-xylulose 5-phosphate biosynthetic process (GO:0052865);	1 out of 1011 0.0989119683481701%	6 out of 23596 0.0254280386506187%	1
Biological Process: quinone cofactor metabolic process (GO:0042375);	1 out of 1011 0.0989119683481701%	6 out of 23596 0.0254280386506187%	1
Biological Process: DNA damage response, signal transduction by p53 class mediator resulting in transcription of p21 class mediator (GO:0006978);	1 out of 1011 0.0989119683481701%	6 out of 23596 0.0254280386506187%	1
Biological Process: adenylate cyclase-modulating G-protein coupled receptor signaling pathway (GO:0007188);	1 out of 1011 0.0989119683481701%	6 out of 23596 0.0254280386506187%	1
Biological Process: pancreas development (GO:0031016);	1 out of 1011 0.0989119683481701%	6 out of 23596 0.0254280386506187%	1
Biological Process: regulation of clathrin-mediated endocytosis (GO:2000369);	1 out of 1011 0.0989119683481701%	6 out of 23596 0.0254280386506187%	1
Biological Process: rhamnogalacturonan II biosynthetic process (GO:0010306);	1 out of 1011 0.0989119683481701%	6 out of 23596 0.0254280386506187%	1
Biological Process: membrane protein proteolysis (GO:0033619);	1 out of 1011 0.0989119683481701%	6 out of 23596 0.0254280386506187%	1
Biological Process: ergosterol biosynthetic process (GO:0006696);	1 out of 1011 0.0989119683481701%	6 out of 23596 0.0254280386506187%	1
Biological Process: glycosylceramide catabolic process (GO:0046477);	1 out of 1011 0.0989119683481701%	6 out of 23596 0.0254280386506187%	1
Biological Process: nectar secretion (GO:0071836);	1 out of 1011 0.0989119683481701%	6 out of 23596 0.0254280386506187%	1
Biological Process: plasma membrane organization (GO:0007009);	1 out of 1011 0.0989119683481701%	6 out of 23596 0.0254280386506187%	1
Biological Process: glycosaminoglycan catabolic process (GO:0006027);	1 out of 1011 0.0989119683481701%	6 out of 23596 0.0254280386506187%	1
Biological Process: inosine catabolic process (GO:0006148);	1 out of 1011 0.0989119683481701%	6 out of 23596 0.0254280386506187%	1
Biological Process: regulation of cholesterol metabolic process (GO:0090181);	1 out of 1011 0.0989119683481701%	6 out of 23596 0.0254280386506187%	1
Biological Process: detection of cytokinin stimulus (GO:0009722);	1 out of 1011 0.0989119683481701%	6 out of 23596 0.0254280386506187%	1
Biological Process: regulation of ethylene mediated signaling pathway (GO:0010104);	1 out of 1011 0.0989119683481701%	6 out of 23596 0.0254280386506187%	1
Biological Process: regulation of steroid metabolic process (GO:0019218);	1 out of 1011 0.0989119683481701%	6 out of 23596 0.0254280386506187%	1
Biological Process: coenzyme A transmembrane transport (GO:0035349);	1 out of 1011 0.0989119683481701%	6 out of 23596 0.0254280386506187%	1
Biological Process: phospholipid catabolic process (GO:0009395);	1 out of 1011 0.0989119683481701%	6 out of 23596 0.0254280386506187%	1
Biological Process: regulation of localization (GO:0032879);	3 out of 1011 0.29673590504451%	39 out of 23596 0.165282251229022%	1
Biological Process: regulation of defense response (GO:0031347);	18 out of 1011 1.78041543026706%	347 out of 23596 1.47058823529412%	1
Biological Process: regulation of biological quality (GO:0065008);	20 out of 1011 1.9782393669634%	390 out of 23596 1.65282251229022%	1
Biological Process: carbohydrate derivative biosynthetic process (GO:1901137);	4 out of 1011 0.395647873392681%	58 out of 23596 0.245804373622648%	1
Biological Process: monocarboxylic acid metabolic process (GO:0032787);	4 out of 1011 0.395647873392681%	58 out of 23596 0.245804373622648%	1
Biological Process: response to endoplasmic reticulum stress (GO:0034976);	22 out of 1011 2.17606330365974%	434 out of 23596 1.83929479572809%	1
Biological Process: cadmium ion transport (GO:0015691);	8 out of 1011 0.791295746785361%	138 out of 23596 0.584844888964231%	1
Biological Process: serine family amino acid metabolic process (GO:0009069);	2 out of 1011 0.19782393669634%	22 out of 23596 0.0932361417189354%	1
Biological Process: protein methylation (GO:0006479);	2 out of 1011 0.19782393669634%	22 out of 23596 0.0932361417189354%	1
Biological Process: cholesterol metabolic process (GO:0008203);	2 out of 1011 0.19782393669634%	22 out of 23596 0.0932361417189354%	1
Biological Process: epithelium development (GO:0060429);	2 out of 1011 0.19782393669634%	22 out of 23596 0.0932361417189354%	1
Biological Process: tryptophan catabolic process (GO:0006569);	10 out of 1011 0.989119683481701%	180 out of 23596 0.762841159518562%	1
Biological Process: small molecule biosynthetic process (GO:0044283);	3 out of 1011 0.29673590504451%	40 out of 23596 0.169520257670792%	1
Biological Process: inflorescence morphogenesis (GO:0048281);	3 out of 1011 0.29673590504451%	40 out of 23596 0.169520257670792%	1
Biological Process: protein homotetramerization (GO:0051289);	4 out of 1011 0.395647873392681%	59 out of 23596 0.250042380064418%	1
Biological Process: oogenesis (GO:0048477);	4 out of 1011 0.395647873392681%	59 out of 23596 0.250042380064418%	1
Biological Process: cell redox homeostasis (GO:0045454);	7 out of 1011 0.692383778437191%	119 out of 23596 0.504322766570605%	1
Biological Process: sucrose transport (GO:0015770);	3 out of 1011 0.29673590504451%	41 out of 23596 0.173758264112561%	1
Biological Process: regulation of multi-organism process (GO:0043900);	16 out of 1011 1.58259149357072%	310 out of 23596 1.31378199694864%	1
Biological Process: regulation of seed germination (GO:0010029);	6 out of 1011 0.593471810089021%	100 out of 23596 0.423800644176979%	1
Biological Process: regulation of growth (GO:0040008);	5 out of 1011 0.494559841740851%	80 out of 23596 0.339040515341583%	1
Biological Process: intrinsic apoptotic signaling pathway (GO:0097193);	2 out of 1011 0.19782393669634%	23 out of 23596 0.0974741481607052%	1
Biological Process: response to lithium ion (GO:0010226);	2 out of 1011 0.19782393669634%	23 out of 23596 0.0974741481607052%	1
Biological Process: central nervous system neuron differentiation (GO:0021953);	2 out of 1011 0.19782393669634%	23 out of 23596 0.0974741481607052%	1
Biological Process: negative regulation of response to stimulus (GO:0048585);	2 out of 1011 0.19782393669634%	23 out of 23596 0.0974741481607052%	1
Biological Process: response to estrogen stimulus (GO:0043627);	2 out of 1011 0.19782393669634%	23 out of 23596 0.0974741481607052%	1
Biological Process: anatomical structure morphogenesis (GO:0009653);	21 out of 1011 2.07715133531157%	419 out of 23596 1.77572469910154%	1
Biological Process: regulation of cellular process (GO:0050794);	39 out of 1011 3.85756676557863%	816 out of 23596 3.45821325648415%	1
Biological Process: response to glucose stimulus (GO:0009749);	13 out of 1011 1.28585558852621%	247 out of 23596 1.04678759111714%	1
Biological Process: specification of organ position (GO:0010159);	1 out of 1011 0.0989119683481701%	7 out of 23596 0.0296660450923885%	1
Biological Process: regulation of cytoskeleton organization (GO:0051493);	1 out of 1011 0.0989119683481701%	7 out of 23596 0.0296660450923885%	1
Biological Process: positive regulation of salicylic acid mediated signaling pathway (GO:0080151);	1 out of 1011 0.0989119683481701%	7 out of 23596 0.0296660450923885%	1
Biological Process: signaling (GO:0023052);	1 out of 1011 0.0989119683481701%	7 out of 23596 0.0296660450923885%	1
Biological Process: positive regulation of transporter activity (GO:0032411);	1 out of 1011 0.0989119683481701%	7 out of 23596 0.0296660450923885%	1
Biological Process: regulation of cytokine production (GO:0001817);	1 out of 1011 0.0989119683481701%	7 out of 23596 0.0296660450923885%	1
Biological Process: raffinose transport (GO:0015773);	1 out of 1011 0.0989119683481701%	7 out of 23596 0.0296660450923885%	1
Biological Process: positive regulation of RNA splicing (GO:0033120);	1 out of 1011 0.0989119683481701%	7 out of 23596 0.0296660450923885%	1
Biological Process: plasma lipoprotein particle remodeling (GO:0034369);	1 out of 1011 0.0989119683481701%	7 out of 23596 0.0296660450923885%	1
Biological Process: regulation of protein serine/threonine phosphatase activity (GO:0080163);	1 out of 1011 0.0989119683481701%	7 out of 23596 0.0296660450923885%	1
Biological Process: regulation of abscisic acid mediated signaling pathway (GO:0009787);	1 out of 1011 0.0989119683481701%	7 out of 23596 0.0296660450923885%	1
Biological Process: myelin assembly (GO:0032288);	1 out of 1011 0.0989119683481701%	7 out of 23596 0.0296660450923885%	1
Biological Process: positive regulation of cellular response to drug (GO:2001040);	1 out of 1011 0.0989119683481701%	7 out of 23596 0.0296660450923885%	1
Biological Process: protein O-linked glycosylation (GO:0006493);	1 out of 1011 0.0989119683481701%	7 out of 23596 0.0296660450923885%	1
Biological Process: oxalate transport (GO:0019532);	1 out of 1011 0.0989119683481701%	7 out of 23596 0.0296660450923885%	1
Biological Process: negative regulation of lipid storage (GO:0010888);	1 out of 1011 0.0989119683481701%	7 out of 23596 0.0296660450923885%	1
Biological Process: gibberellin mediated signaling pathway (GO:0010476);	1 out of 1011 0.0989119683481701%	7 out of 23596 0.0296660450923885%	1
Biological Process: spore germination (GO:0009847);	1 out of 1011 0.0989119683481701%	7 out of 23596 0.0296660450923885%	1
Biological Process: positive regulation of erythrocyte differentiation (GO:0045648);	1 out of 1011 0.0989119683481701%	7 out of 23596 0.0296660450923885%	1
Biological Process: protein unfolding (GO:0043335);	1 out of 1011 0.0989119683481701%	7 out of 23596 0.0296660450923885%	1
Biological Process: auxin homeostasis (GO:0010252);	5 out of 1011 0.494559841740851%	81 out of 23596 0.343278521783353%	1
Biological Process: response to reactive oxygen species (GO:0000302);	5 out of 1011 0.494559841740851%	81 out of 23596 0.343278521783353%	1
Biological Process: asymmetric cell division (GO:0008356);	5 out of 1011 0.494559841740851%	81 out of 23596 0.343278521783353%	1
Biological Process: cellular membrane fusion (GO:0006944);	32 out of 1011 3.16518298714144%	663 out of 23596 2.80979827089337%	1
Biological Process: developmental process involved in reproduction (GO:0003006);	7 out of 1011 0.692383778437191%	122 out of 23596 0.517036785895915%	1
Biological Process: response to hypoxia (GO:0001666);	10 out of 1011 0.989119683481701%	185 out of 23596 0.784031191727411%	1
Biological Process: salicylic acid biosynthetic process (GO:0009697);	34 out of 1011 3.36300692383778%	709 out of 23596 3.00474656721478%	1
Biological Process: purine-containing compound metabolic process (GO:0072521);	2 out of 1011 0.19782393669634%	24 out of 23596 0.101712154602475%	1
Biological Process: spindle organization (GO:0007051);	2 out of 1011 0.19782393669634%	24 out of 23596 0.101712154602475%	1
Biological Process: positive regulation of histone H3-K9 methylation (GO:0051574);	2 out of 1011 0.19782393669634%	24 out of 23596 0.101712154602475%	1
Biological Process: cold acclimation (GO:0009631);	5 out of 1011 0.494559841740851%	82 out of 23596 0.347516528225123%	1
Biological Process: chlorophyll catabolic process (GO:0015996);	10 out of 1011 0.989119683481701%	186 out of 23596 0.788269198169181%	1
Biological Process: actin filament organization (GO:0007015);	3 out of 1011 0.29673590504451%	43 out of 23596 0.182234276996101%	1
Biological Process: iron ion homeostasis (GO:0055072);	3 out of 1011 0.29673590504451%	43 out of 23596 0.182234276996101%	1
Biological Process: response to starvation (GO:0042594);	3 out of 1011 0.29673590504451%	43 out of 23596 0.182234276996101%	1
Biological Process: cellular membrane organization (GO:0016044);	13 out of 1011 1.28585558852621%	251 out of 23596 1.06373961688422%	1
Biological Process: polyamine catabolic process (GO:0006598);	10 out of 1011 0.989119683481701%	187 out of 23596 0.792507204610951%	1
Biological Process: microsporogenesis (GO:0009556);	9 out of 1011 0.890207715133531%	166 out of 23596 0.703509069333785%	1
Biological Process: nucleotide transport (GO:0006862);	8 out of 1011 0.791295746785361%	145 out of 23596 0.61451093405662%	1
Biological Process: response to temperature stimulus (GO:0009266);	13 out of 1011 1.28585558852621%	252 out of 23596 1.06797762332599%	1
Biological Process: fatty acid metabolic process (GO:0006631);	6 out of 1011 0.593471810089021%	104 out of 23596 0.440752669944058%	1
Biological Process: positive regulation of molecular function (GO:0044093);	2 out of 1011 0.19782393669634%	25 out of 23596 0.105950161044245%	1
Biological Process: cell-cell signaling involved in cardiac conduction (GO:0086019);	2 out of 1011 0.19782393669634%	25 out of 23596 0.105950161044245%	1
Biological Process: carbohydrate phosphorylation (GO:0046835);	2 out of 1011 0.19782393669634%	25 out of 23596 0.105950161044245%	1
Biological Process: sodium ion transmembrane transport (GO:0035725);	3 out of 1011 0.29673590504451%	44 out of 23596 0.186472283437871%	1
Biological Process: defense response to fungus, incompatible interaction (GO:0009817);	10 out of 1011 0.989119683481701%	189 out of 23596 0.800983217494491%	1
Biological Process: regulation of flower development (GO:0009909);	28 out of 1011 2.76953511374876%	583 out of 23596 2.47075775555179%	1
Biological Process: cellular response to iron ion (GO:0071281);	8 out of 1011 0.791295746785361%	147 out of 23596 0.622986946940159%	1
Biological Process: modified amino acid transport (GO:0072337);	1 out of 1011 0.0989119683481701%	8 out of 23596 0.0339040515341583%	1
Biological Process: galactose catabolic process (GO:0019388);	1 out of 1011 0.0989119683481701%	8 out of 23596 0.0339040515341583%	1
Biological Process: regulation of vegetative phase change (GO:0010321);	1 out of 1011 0.0989119683481701%	8 out of 23596 0.0339040515341583%	1
Biological Process: positive regulation of posttranscriptional gene silencing (GO:0060148);	1 out of 1011 0.0989119683481701%	8 out of 23596 0.0339040515341583%	1
Biological Process: response to host immune response (GO:0052572);	1 out of 1011 0.0989119683481701%	8 out of 23596 0.0339040515341583%	1
Biological Process: multicellular organismal water homeostasis (GO:0050891);	1 out of 1011 0.0989119683481701%	8 out of 23596 0.0339040515341583%	1
Biological Process: negative regulation of osteoblast differentiation (GO:0045668);	1 out of 1011 0.0989119683481701%	8 out of 23596 0.0339040515341583%	1
Biological Process: peripheral nervous system myelin maintenance (GO:0032287);	1 out of 1011 0.0989119683481701%	8 out of 23596 0.0339040515341583%	1
Biological Process: attachment of spindle microtubules to kinetochore (GO:0008608);	1 out of 1011 0.0989119683481701%	8 out of 23596 0.0339040515341583%	1
Biological Process: tRNA splicing, via endonucleolytic cleavage and ligation (GO:0006388);	1 out of 1011 0.0989119683481701%	8 out of 23596 0.0339040515341583%	1
Biological Process: modulation by virus of host cellular process (GO:0019054);	1 out of 1011 0.0989119683481701%	8 out of 23596 0.0339040515341583%	1
Biological Process: glutathione catabolic process (GO:0006751);	1 out of 1011 0.0989119683481701%	8 out of 23596 0.0339040515341583%	1
Biological Process: lysine catabolic process (GO:0006554);	1 out of 1011 0.0989119683481701%	8 out of 23596 0.0339040515341583%	1
Biological Process: chalcone biosynthetic process (GO:0009715);	1 out of 1011 0.0989119683481701%	8 out of 23596 0.0339040515341583%	1
Biological Process: transmitting tissue development (GO:0010500);	1 out of 1011 0.0989119683481701%	8 out of 23596 0.0339040515341583%	1
Biological Process: dimethylallyl diphosphate metabolic process (GO:0050993);	1 out of 1011 0.0989119683481701%	8 out of 23596 0.0339040515341583%	1
Biological Process: regulation of response to water deprivation (GO:2000070);	1 out of 1011 0.0989119683481701%	8 out of 23596 0.0339040515341583%	1
Biological Process: negative regulation of cytokine production (GO:0001818);	1 out of 1011 0.0989119683481701%	8 out of 23596 0.0339040515341583%	1
Biological Process: regulation of auxin polar transport (GO:2000012);	1 out of 1011 0.0989119683481701%	8 out of 23596 0.0339040515341583%	1
Biological Process: photosystem I stabilization (GO:0042550);	1 out of 1011 0.0989119683481701%	8 out of 23596 0.0339040515341583%	1
Biological Process: CenH3-containing nucleosome assembly at centromere (GO:0034080);	1 out of 1011 0.0989119683481701%	8 out of 23596 0.0339040515341583%	1
Biological Process: 3'-UTR-mediated mRNA stabilization (GO:0070935);	1 out of 1011 0.0989119683481701%	8 out of 23596 0.0339040515341583%	1
Biological Process: type I hypersensitivity (GO:0016068);	1 out of 1011 0.0989119683481701%	8 out of 23596 0.0339040515341583%	1
Biological Process: response to magnesium ion (GO:0032026);	1 out of 1011 0.0989119683481701%	8 out of 23596 0.0339040515341583%	1
Biological Process: cellular response to salicylic acid stimulus (GO:0071446);	1 out of 1011 0.0989119683481701%	8 out of 23596 0.0339040515341583%	1
Biological Process: response to dietary excess (GO:0002021);	1 out of 1011 0.0989119683481701%	8 out of 23596 0.0339040515341583%	1
Biological Process: isoprene biosynthetic process (GO:0043612);	1 out of 1011 0.0989119683481701%	8 out of 23596 0.0339040515341583%	1
Biological Process: positive regulation of metalloenzyme activity (GO:0048554);	1 out of 1011 0.0989119683481701%	8 out of 23596 0.0339040515341583%	1
Biological Process: valine metabolic process (GO:0006573);	1 out of 1011 0.0989119683481701%	8 out of 23596 0.0339040515341583%	1
Biological Process: imaginal disc-derived leg morphogenesis (GO:0007480);	1 out of 1011 0.0989119683481701%	8 out of 23596 0.0339040515341583%	1
Biological Process: cellular response to absence of light (GO:0071485);	1 out of 1011 0.0989119683481701%	8 out of 23596 0.0339040515341583%	1
Biological Process: cell growth mode switching, budding to filamentous (GO:0036187);	1 out of 1011 0.0989119683481701%	8 out of 23596 0.0339040515341583%	1
Biological Process: ethylene mediated signaling pathway (GO:0009873);	18 out of 1011 1.78041543026706%	363 out of 23596 1.53839633836243%	1
Biological Process: proanthocyanidin biosynthetic process (GO:0010023);	5 out of 1011 0.494559841740851%	85 out of 23596 0.360230547550432%	1
Biological Process: regulation of meristem structural organization (GO:0009934);	5 out of 1011 0.494559841740851%	85 out of 23596 0.360230547550432%	1
Biological Process: immune response (GO:0006955);	6 out of 1011 0.593471810089021%	106 out of 23596 0.449228682827598%	1
Biological Process: meiosis I (GO:0007127);	6 out of 1011 0.593471810089021%	106 out of 23596 0.449228682827598%	1
Biological Process: sexual reproduction (GO:0019953);	3 out of 1011 0.29673590504451%	45 out of 23596 0.190710289879641%	1
Biological Process: catabolic process (GO:0009056);	3 out of 1011 0.29673590504451%	45 out of 23596 0.190710289879641%	1
Biological Process: proximal/distal pattern formation (GO:0009954);	3 out of 1011 0.29673590504451%	45 out of 23596 0.190710289879641%	1
Biological Process: cellular response to sulfate starvation (GO:0009970);	3 out of 1011 0.29673590504451%	45 out of 23596 0.190710289879641%	1
Biological Process: cellular nitrogen compound biosynthetic process (GO:0044271);	4 out of 1011 0.395647873392681%	65 out of 23596 0.275470418715036%	1
Biological Process: sulfate transport (GO:0008272);	2 out of 1011 0.19782393669634%	26 out of 23596 0.110188167486015%	1
Biological Process: centrosome organization (GO:0051297);	2 out of 1011 0.19782393669634%	26 out of 23596 0.110188167486015%	1
Biological Process: hormone-mediated signaling pathway (GO:0009755);	16 out of 1011 1.58259149357072%	322 out of 23596 1.36463807424987%	1
Biological Process: response to xenobiotic stimulus (GO:0009410);	7 out of 1011 0.692383778437191%	128 out of 23596 0.542464824546533%	1
Biological Process: regulation of anion channel activity (GO:0010359);	11 out of 1011 1.08803165182987%	214 out of 23596 0.906933378538735%	1
Biological Process: regulation of root meristem growth (GO:0010082);	4 out of 1011 0.395647873392681%	66 out of 23596 0.279708425156806%	1
Biological Process: epidermal cell differentiation (GO:0009913);	4 out of 1011 0.395647873392681%	66 out of 23596 0.279708425156806%	1
Biological Process: regulation of anthocyanin biosynthetic process (GO:0031540);	4 out of 1011 0.395647873392681%	66 out of 23596 0.279708425156806%	1
Biological Process: flower morphogenesis (GO:0048439);	8 out of 1011 0.791295746785361%	150 out of 23596 0.635700966265469%	1
Biological Process: response to unfolded protein (GO:0006986);	3 out of 1011 0.29673590504451%	46 out of 23596 0.19494829632141%	1
Biological Process: detection of bacterium (GO:0016045);	7 out of 1011 0.692383778437191%	129 out of 23596 0.546702830988303%	1
Biological Process: cellular carbohydrate metabolic process (GO:0044262);	6 out of 1011 0.593471810089021%	108 out of 23596 0.457704695711137%	1
Biological Process: brain development (GO:0007420);	6 out of 1011 0.593471810089021%	108 out of 23596 0.457704695711137%	1
Biological Process: inorganic anion transport (GO:0015698);	2 out of 1011 0.19782393669634%	27 out of 23596 0.114426173927784%	1
Biological Process: SA node cardiomyocyte to atrial cardiomyocyte communication (GO:0086070);	2 out of 1011 0.19782393669634%	27 out of 23596 0.114426173927784%	1
Biological Process: positive regulation of histone H3-K4 methylation (GO:0051571);	2 out of 1011 0.19782393669634%	27 out of 23596 0.114426173927784%	1
Biological Process: interspecies interaction between organisms (GO:0044419);	2 out of 1011 0.19782393669634%	27 out of 23596 0.114426173927784%	1
Biological Process: fatty acid transport (GO:0015908);	2 out of 1011 0.19782393669634%	27 out of 23596 0.114426173927784%	1
Biological Process: hyperosmotic response (GO:0006972);	13 out of 1011 1.28585558852621%	260 out of 23596 1.10188167486015%	1
Biological Process: fructose metabolic process (GO:0006000);	1 out of 1011 0.0989119683481701%	9 out of 23596 0.0381420579759281%	1
Biological Process: regulation of photosynthesis (GO:0010109);	1 out of 1011 0.0989119683481701%	9 out of 23596 0.0381420579759281%	1
Biological Process: regulation of vegetative meristem growth (GO:0010083);	1 out of 1011 0.0989119683481701%	9 out of 23596 0.0381420579759281%	1
Biological Process: cell projection assembly (GO:0030031);	1 out of 1011 0.0989119683481701%	9 out of 23596 0.0381420579759281%	1
Biological Process: response to nicotine (GO:0035094);	1 out of 1011 0.0989119683481701%	9 out of 23596 0.0381420579759281%	1
Biological Process: neurotransmitter biosynthetic process (GO:0042136);	1 out of 1011 0.0989119683481701%	9 out of 23596 0.0381420579759281%	1
Biological Process: indoleacetic acid conjugate metabolic process (GO:0033473);	1 out of 1011 0.0989119683481701%	9 out of 23596 0.0381420579759281%	1
Biological Process: regulation of auxin biosynthetic process (GO:0010600);	1 out of 1011 0.0989119683481701%	9 out of 23596 0.0381420579759281%	1
Biological Process: menthol biosynthetic process (GO:0031525);	1 out of 1011 0.0989119683481701%	9 out of 23596 0.0381420579759281%	1
Biological Process: negative regulation of cell size (GO:0045792);	1 out of 1011 0.0989119683481701%	9 out of 23596 0.0381420579759281%	1
Biological Process: ventral spinal cord development (GO:0021517);	1 out of 1011 0.0989119683481701%	9 out of 23596 0.0381420579759281%	1
Biological Process: intraflagellar anterograde transport (GO:0035720);	1 out of 1011 0.0989119683481701%	9 out of 23596 0.0381420579759281%	1
Biological Process: positive regulation of transcription from RNA polymerase I promoter (GO:0045943);	1 out of 1011 0.0989119683481701%	9 out of 23596 0.0381420579759281%	1
Biological Process: nitrate assimilation (GO:0042128);	1 out of 1011 0.0989119683481701%	9 out of 23596 0.0381420579759281%	1
Biological Process: regulation of actin filament depolymerization (GO:0030834);	1 out of 1011 0.0989119683481701%	9 out of 23596 0.0381420579759281%	1
Biological Process: inflorescence meristem growth (GO:0010450);	1 out of 1011 0.0989119683481701%	9 out of 23596 0.0381420579759281%	1
Biological Process: glycine decarboxylation via glycine cleavage system (GO:0019464);	1 out of 1011 0.0989119683481701%	9 out of 23596 0.0381420579759281%	1
Biological Process: negative regulation of myelination (GO:0031642);	1 out of 1011 0.0989119683481701%	9 out of 23596 0.0381420579759281%	1
Biological Process: positive regulation of insulin secretion (GO:0032024);	1 out of 1011 0.0989119683481701%	9 out of 23596 0.0381420579759281%	1
Biological Process: embryonic digestive tract development (GO:0048566);	1 out of 1011 0.0989119683481701%	9 out of 23596 0.0381420579759281%	1
Biological Process: regulation of protein complex assembly (GO:0043254);	1 out of 1011 0.0989119683481701%	9 out of 23596 0.0381420579759281%	1
Biological Process: nuclear mRNA cis splicing, via spliceosome (GO:0045292);	1 out of 1011 0.0989119683481701%	9 out of 23596 0.0381420579759281%	1
Biological Process: embryonic organ morphogenesis (GO:0048562);	1 out of 1011 0.0989119683481701%	9 out of 23596 0.0381420579759281%	1
Biological Process: chitin metabolic process (GO:0006030);	1 out of 1011 0.0989119683481701%	9 out of 23596 0.0381420579759281%	1
Biological Process: establishment of vesicle localization (GO:0051650);	1 out of 1011 0.0989119683481701%	9 out of 23596 0.0381420579759281%	1
Biological Process: glycine biosynthetic process (GO:0006545);	1 out of 1011 0.0989119683481701%	9 out of 23596 0.0381420579759281%	1
Biological Process: specification of organ number (GO:0048832);	1 out of 1011 0.0989119683481701%	9 out of 23596 0.0381420579759281%	1
Biological Process: cellular nitrogen compound catabolic process (GO:0044270);	1 out of 1011 0.0989119683481701%	9 out of 23596 0.0381420579759281%	1
Biological Process: regulation of mitotic spindle organization (GO:0060236);	1 out of 1011 0.0989119683481701%	9 out of 23596 0.0381420579759281%	1
Biological Process: water-soluble vitamin metabolic process (GO:0006767);	3 out of 1011 0.29673590504451%	47 out of 23596 0.19918630276318%	1
Biological Process: regulation of timing of transition from vegetative to reproductive phase (GO:0048510);	7 out of 1011 0.692383778437191%	131 out of 23596 0.555178843871843%	1
Biological Process: brassinosteroid homeostasis (GO:0010268);	4 out of 1011 0.395647873392681%	68 out of 23596 0.288184438040346%	1
Biological Process: actin filament-based movement (GO:0030048);	7 out of 1011 0.692383778437191%	132 out of 23596 0.559416850313612%	1
Biological Process: activation of MAPKK activity (GO:0000186);	7 out of 1011 0.692383778437191%	132 out of 23596 0.559416850313612%	1
Biological Process: cysteine biosynthetic process from serine (GO:0006535);	2 out of 1011 0.19782393669634%	28 out of 23596 0.118664180369554%	1
Biological Process: cellular potassium ion homeostasis (GO:0030007);	2 out of 1011 0.19782393669634%	28 out of 23596 0.118664180369554%	1
Biological Process: circumnutation (GO:0010031);	2 out of 1011 0.19782393669634%	28 out of 23596 0.118664180369554%	1
Biological Process: glucose homeostasis (GO:0042593);	2 out of 1011 0.19782393669634%	28 out of 23596 0.118664180369554%	1
Biological Process: vitamin E biosynthetic process (GO:0010189);	2 out of 1011 0.19782393669634%	28 out of 23596 0.118664180369554%	1
Biological Process: mismatch repair (GO:0006298);	2 out of 1011 0.19782393669634%	28 out of 23596 0.118664180369554%	1
Biological Process: establishment or maintenance of cell polarity (GO:0007163);	2 out of 1011 0.19782393669634%	28 out of 23596 0.118664180369554%	1
Biological Process: transcription factor import into nucleus (GO:0042991);	5 out of 1011 0.494559841740851%	90 out of 23596 0.381420579759281%	1
Biological Process: detection of biotic stimulus (GO:0009595);	15 out of 1011 1.48367952522255%	308 out of 23596 1.3053059840651%	1
Biological Process: plant-type cell wall cellulose metabolic process (GO:0052541);	10 out of 1011 0.989119683481701%	198 out of 23596 0.839125275470419%	1
Biological Process: toxin catabolic process (GO:0009407);	22 out of 1011 2.17606330365974%	464 out of 23596 1.96643498898118%	1
Biological Process: cell wall pectin metabolic process (GO:0052546);	11 out of 1011 1.08803165182987%	220 out of 23596 0.932361417189354%	1
Biological Process: potassium ion transport (GO:0006813);	5 out of 1011 0.494559841740851%	91 out of 23596 0.385658586201051%	1
Biological Process: regulation of multicellular organismal process (GO:0051239);	4 out of 1011 0.395647873392681%	70 out of 23596 0.296660450923885%	1
Biological Process: basipetal auxin transport (GO:0010540);	4 out of 1011 0.395647873392681%	70 out of 23596 0.296660450923885%	1
Biological Process: Golgi organization (GO:0007030);	23 out of 1011 2.27497527200791%	489 out of 23596 2.07238515002543%	1
Biological Process: embryo sac development (GO:0009553);	11 out of 1011 1.08803165182987%	222 out of 23596 0.940837430072894%	1
Biological Process: cellular macromolecule localization (GO:0070727);	2 out of 1011 0.19782393669634%	29 out of 23596 0.122902186811324%	1
Biological Process: response to hyperoxia (GO:0055093);	1 out of 1011 0.0989119683481701%	10 out of 23596 0.0423800644176979%	1
Biological Process: respiratory burst (GO:0045730);	1 out of 1011 0.0989119683481701%	10 out of 23596 0.0423800644176979%	1
Biological Process: segment specification (GO:0007379);	1 out of 1011 0.0989119683481701%	10 out of 23596 0.0423800644176979%	1
Biological Process: actin cytoskeleton reorganization (GO:0031532);	1 out of 1011 0.0989119683481701%	10 out of 23596 0.0423800644176979%	1
Biological Process: positive regulation of Ras GTPase activity (GO:0032320);	1 out of 1011 0.0989119683481701%	10 out of 23596 0.0423800644176979%	1
Biological Process: regulation of neurogenesis (GO:0050767);	1 out of 1011 0.0989119683481701%	10 out of 23596 0.0423800644176979%	1
Biological Process: aldehyde catabolic process (GO:0046185);	1 out of 1011 0.0989119683481701%	10 out of 23596 0.0423800644176979%	1
Biological Process: response to neutral pH (GO:0036176);	1 out of 1011 0.0989119683481701%	10 out of 23596 0.0423800644176979%	1
Biological Process: glutamine biosynthetic process (GO:0006542);	1 out of 1011 0.0989119683481701%	10 out of 23596 0.0423800644176979%	1
Biological Process: leukotriene metabolic process (GO:0006691);	1 out of 1011 0.0989119683481701%	10 out of 23596 0.0423800644176979%	1
Biological Process: epithelial cell development (GO:0002064);	1 out of 1011 0.0989119683481701%	10 out of 23596 0.0423800644176979%	1
Biological Process: social behavior (GO:0035176);	1 out of 1011 0.0989119683481701%	10 out of 23596 0.0423800644176979%	1
Biological Process: potassium ion homeostasis (GO:0055075);	1 out of 1011 0.0989119683481701%	10 out of 23596 0.0423800644176979%	1
Biological Process: activation of MAPKK activity involved in osmosensory signaling pathway (GO:0000168);	1 out of 1011 0.0989119683481701%	10 out of 23596 0.0423800644176979%	1
Biological Process: protein import into mitochondrial outer membrane (GO:0045040);	1 out of 1011 0.0989119683481701%	10 out of 23596 0.0423800644176979%	1
Biological Process: regulation of nitric-oxide synthase activity (GO:0050999);	1 out of 1011 0.0989119683481701%	10 out of 23596 0.0423800644176979%	1
Biological Process: cellular response to blue light (GO:0071483);	1 out of 1011 0.0989119683481701%	10 out of 23596 0.0423800644176979%	1
Biological Process: 'de novo' UMP biosynthetic process (GO:0044205);	1 out of 1011 0.0989119683481701%	10 out of 23596 0.0423800644176979%	1
Biological Process: regulation of root morphogenesis (GO:2000067);	1 out of 1011 0.0989119683481701%	10 out of 23596 0.0423800644176979%	1
Biological Process: response to deep water (GO:0030912);	1 out of 1011 0.0989119683481701%	10 out of 23596 0.0423800644176979%	1
Biological Process: positive regulation of telomerase activity (GO:0051973);	1 out of 1011 0.0989119683481701%	10 out of 23596 0.0423800644176979%	1
Biological Process: indole phytoalexin biosynthetic process (GO:0009700);	1 out of 1011 0.0989119683481701%	10 out of 23596 0.0423800644176979%	1
Biological Process: actin filament polymerization (GO:0030041);	1 out of 1011 0.0989119683481701%	10 out of 23596 0.0423800644176979%	1
Biological Process: nuclear migration along microtubule (GO:0030473);	1 out of 1011 0.0989119683481701%	10 out of 23596 0.0423800644176979%	1
Biological Process: regulation of ion transport (GO:0043269);	7 out of 1011 0.692383778437191%	135 out of 23596 0.572130869638922%	1
Biological Process: root hair cell differentiation (GO:0048765);	20 out of 1011 1.9782393669634%	424 out of 23596 1.79691473131039%	1
Biological Process: proton transport (GO:0015992);	4 out of 1011 0.395647873392681%	71 out of 23596 0.300898457365655%	1
Biological Process: tapetal cell differentiation (GO:0048657);	3 out of 1011 0.29673590504451%	50 out of 23596 0.21190032208849%	1
Biological Process: radial pattern formation (GO:0009956);	3 out of 1011 0.29673590504451%	50 out of 23596 0.21190032208849%	1
Biological Process: heterocycle biosynthetic process (GO:0018130);	3 out of 1011 0.29673590504451%	50 out of 23596 0.21190032208849%	1
Biological Process: programmed cell death (GO:0012501);	6 out of 1011 0.593471810089021%	114 out of 23596 0.483132734361756%	1
Biological Process: response to external stimulus (GO:0009605);	7 out of 1011 0.692383778437191%	136 out of 23596 0.576368876080692%	1
Biological Process: response to endogenous stimulus (GO:0009719);	8 out of 1011 0.791295746785361%	158 out of 23596 0.669605017799627%	1
Biological Process: gravitropism (GO:0009630);	14 out of 1011 1.38476755687438%	291 out of 23596 1.23325987455501%	1
Biological Process: (1->3)-beta-D-glucan biosynthetic process (GO:0006075);	2 out of 1011 0.19782393669634%	30 out of 23596 0.127140193253094%	1
Biological Process: phosphatidylinositol metabolic process (GO:0046488);	2 out of 1011 0.19782393669634%	30 out of 23596 0.127140193253094%	1
Biological Process: embryonic meristem development (GO:0048508);	2 out of 1011 0.19782393669634%	30 out of 23596 0.127140193253094%	1
Biological Process: cellular component morphogenesis (GO:0032989);	6 out of 1011 0.593471810089021%	115 out of 23596 0.487370740803526%	1
Biological Process: secondary metabolic process (GO:0019748);	7 out of 1011 0.692383778437191%	137 out of 23596 0.580606882522461%	1
Biological Process: actin nucleation (GO:0045010);	13 out of 1011 1.28585558852621%	270 out of 23596 1.14426173927784%	1
Biological Process: regulation of organelle organization (GO:0033043);	3 out of 1011 0.29673590504451%	51 out of 23596 0.216138328530259%	1
Biological Process: defense response signaling pathway, resistance gene-independent (GO:0010204);	3 out of 1011 0.29673590504451%	51 out of 23596 0.216138328530259%	1
Biological Process: cellular process involved in reproduction (GO:0048610);	11 out of 1011 1.08803165182987%	226 out of 23596 0.957789455839973%	1
Biological Process: pathogen-associated molecular pattern dependent induction by symbiont of host innate immune response (GO:0052033);	4 out of 1011 0.395647873392681%	73 out of 23596 0.309374470249195%	1
Biological Process: G2/M transition of mitotic cell cycle (GO:0000086);	4 out of 1011 0.395647873392681%	73 out of 23596 0.309374470249195%	1
Biological Process: lipid homeostasis (GO:0055088);	1 out of 1011 0.0989119683481701%	11 out of 23596 0.0466180708594677%	1
Biological Process: phloem glucosinolate loading (GO:0090449);	1 out of 1011 0.0989119683481701%	11 out of 23596 0.0466180708594677%	1
Biological Process: positive regulation of nitric oxide biosynthetic process (GO:0045429);	1 out of 1011 0.0989119683481701%	11 out of 23596 0.0466180708594677%	1
Biological Process: myo-inositol transport (GO:0015798);	1 out of 1011 0.0989119683481701%	11 out of 23596 0.0466180708594677%	1
Biological Process: isoleucine biosynthetic process (GO:0009097);	1 out of 1011 0.0989119683481701%	11 out of 23596 0.0466180708594677%	1
Biological Process: regulation of macromolecule biosynthetic process (GO:0010556);	1 out of 1011 0.0989119683481701%	11 out of 23596 0.0466180708594677%	1
Biological Process: conidium formation (GO:0048315);	1 out of 1011 0.0989119683481701%	11 out of 23596 0.0466180708594677%	1
Biological Process: glucosinolate transport (GO:1901349);	1 out of 1011 0.0989119683481701%	11 out of 23596 0.0466180708594677%	1
Biological Process: amylopectin biosynthetic process (GO:0010021);	1 out of 1011 0.0989119683481701%	11 out of 23596 0.0466180708594677%	1
Biological Process: photoperiodism (GO:0009648);	1 out of 1011 0.0989119683481701%	11 out of 23596 0.0466180708594677%	1
Biological Process: positive regulation of JUN kinase activity (GO:0043507);	1 out of 1011 0.0989119683481701%	11 out of 23596 0.0466180708594677%	1
Biological Process: positive regulation of fibroblast proliferation (GO:0048146);	1 out of 1011 0.0989119683481701%	11 out of 23596 0.0466180708594677%	1
Biological Process: cellular response to calcium ion (GO:0071277);	1 out of 1011 0.0989119683481701%	11 out of 23596 0.0466180708594677%	1
Biological Process: histone H3-K4 trimethylation (GO:0080182);	1 out of 1011 0.0989119683481701%	11 out of 23596 0.0466180708594677%	1
Biological Process: fructose 1,6-bisphosphate metabolic process (GO:0030388);	1 out of 1011 0.0989119683481701%	11 out of 23596 0.0466180708594677%	1
Biological Process: detection of fungus (GO:0016046);	1 out of 1011 0.0989119683481701%	11 out of 23596 0.0466180708594677%	1
Biological Process: regulation of hemocyte differentiation (GO:0045610);	1 out of 1011 0.0989119683481701%	11 out of 23596 0.0466180708594677%	1
Biological Process: regulation of hemocyte proliferation (GO:0035206);	1 out of 1011 0.0989119683481701%	11 out of 23596 0.0466180708594677%	1
Biological Process: regulation of secondary metabolite biosynthetic process (GO:1900376);	1 out of 1011 0.0989119683481701%	11 out of 23596 0.0466180708594677%	1
Biological Process: protein import into chloroplast thylakoid membrane (GO:0045038);	1 out of 1011 0.0989119683481701%	11 out of 23596 0.0466180708594677%	1
Biological Process: organic cation transport (GO:0015695);	1 out of 1011 0.0989119683481701%	11 out of 23596 0.0466180708594677%	1
Biological Process: glycoprotein biosynthetic process (GO:0009101);	1 out of 1011 0.0989119683481701%	11 out of 23596 0.0466180708594677%	1
Biological Process: cellular hyperosmotic response (GO:0071474);	1 out of 1011 0.0989119683481701%	11 out of 23596 0.0466180708594677%	1
Biological Process: regulation of cell growth by extracellular stimulus (GO:0001560);	1 out of 1011 0.0989119683481701%	11 out of 23596 0.0466180708594677%	1
Biological Process: neuron fate specification (GO:0048665);	1 out of 1011 0.0989119683481701%	11 out of 23596 0.0466180708594677%	1
Biological Process: chorismate metabolic process (GO:0046417);	1 out of 1011 0.0989119683481701%	11 out of 23596 0.0466180708594677%	1
Biological Process: myofibril assembly (GO:0030239);	1 out of 1011 0.0989119683481701%	11 out of 23596 0.0466180708594677%	1
Biological Process: regulation of programmed cell death (GO:0043067);	10 out of 1011 0.989119683481701%	205 out of 23596 0.868791320562807%	1
Biological Process: nitrogen compound metabolic process (GO:0006807);	9 out of 1011 0.890207715133531%	183 out of 23596 0.775555178843872%	1
Biological Process: chordate embryonic development (GO:0043009);	2 out of 1011 0.19782393669634%	31 out of 23596 0.131378199694864%	1
Biological Process: posttranscriptional regulation of gene expression (GO:0010608);	2 out of 1011 0.19782393669634%	31 out of 23596 0.131378199694864%	1
Biological Process: regulation of cell shape (GO:0008360);	2 out of 1011 0.19782393669634%	31 out of 23596 0.131378199694864%	1
Biological Process: response to estradiol stimulus (GO:0032355);	3 out of 1011 0.29673590504451%	52 out of 23596 0.220376334972029%	1
Biological Process: filamentous growth of a population of unicellular organisms in response to biotic stimulus (GO:0036180);	3 out of 1011 0.29673590504451%	52 out of 23596 0.220376334972029%	1
Biological Process: response to aluminum ion (GO:0010044);	3 out of 1011 0.29673590504451%	52 out of 23596 0.220376334972029%	1
Biological Process: flavonol biosynthetic process (GO:0051555);	5 out of 1011 0.494559841740851%	96 out of 23596 0.4068486184099%	1
Biological Process: pollen development (GO:0009555);	21 out of 1011 2.07715133531157%	455 out of 23596 1.92829293100526%	1
Biological Process: cell-cell signaling (GO:0007267);	10 out of 1011 0.989119683481701%	207 out of 23596 0.877267333446347%	1
Biological Process: cytokinin biosynthetic process (GO:0009691);	3 out of 1011 0.29673590504451%	53 out of 23596 0.224614341413799%	1
Biological Process: response to lipopolysaccharide (GO:0032496);	3 out of 1011 0.29673590504451%	53 out of 23596 0.224614341413799%	1
Biological Process: PSII associated light-harvesting complex II catabolic process (GO:0010304);	3 out of 1011 0.29673590504451%	53 out of 23596 0.224614341413799%	1
Biological Process: response to red or far red light (GO:0009639);	7 out of 1011 0.692383778437191%	141 out of 23596 0.597558908289541%	1
Biological Process: positive regulation of circadian rhythm (GO:0042753);	2 out of 1011 0.19782393669634%	32 out of 23596 0.135616206136633%	1
Biological Process: sucrose metabolic process (GO:0005985);	2 out of 1011 0.19782393669634%	32 out of 23596 0.135616206136633%	1
Biological Process: terpene biosynthetic process (GO:0046246);	2 out of 1011 0.19782393669634%	32 out of 23596 0.135616206136633%	1
Biological Process: protein localization to organelle (GO:0033365);	2 out of 1011 0.19782393669634%	32 out of 23596 0.135616206136633%	1
Biological Process: cytoplasmic transport (GO:0016482);	5 out of 1011 0.494559841740851%	97 out of 23596 0.41108662485167%	1
Biological Process: embryo development (GO:0009790);	18 out of 1011 1.78041543026706%	389 out of 23596 1.64858450584845%	1
Biological Process: epithelial to mesenchymal transition (GO:0001837);	1 out of 1011 0.0989119683481701%	12 out of 23596 0.0508560773012375%	1
Biological Process: cholesterol transport (GO:0030301);	1 out of 1011 0.0989119683481701%	12 out of 23596 0.0508560773012375%	1
Biological Process: neural tube development (GO:0021915);	1 out of 1011 0.0989119683481701%	12 out of 23596 0.0508560773012375%	1
Biological Process: response to jasmonic acid stimulus involved in jasmonic acid and ethylene-dependent systemic resistance (GO:0032260);	1 out of 1011 0.0989119683481701%	12 out of 23596 0.0508560773012375%	1
Biological Process: phosphatidylcholine catabolic process (GO:0034638);	1 out of 1011 0.0989119683481701%	12 out of 23596 0.0508560773012375%	1
Biological Process: nonphotochemical quenching (GO:0010196);	1 out of 1011 0.0989119683481701%	12 out of 23596 0.0508560773012375%	1
Biological Process: chromatin silencing at rDNA (GO:0000183);	1 out of 1011 0.0989119683481701%	12 out of 23596 0.0508560773012375%	1
Biological Process: proteoglycan biosynthetic process (GO:0030166);	1 out of 1011 0.0989119683481701%	12 out of 23596 0.0508560773012375%	1
Biological Process: striated muscle contraction (GO:0006941);	1 out of 1011 0.0989119683481701%	12 out of 23596 0.0508560773012375%	1
Biological Process: cellular response to cytokine stimulus (GO:0071345);	1 out of 1011 0.0989119683481701%	12 out of 23596 0.0508560773012375%	1
Biological Process: lignan biosynthetic process (GO:0009807);	1 out of 1011 0.0989119683481701%	12 out of 23596 0.0508560773012375%	1
Biological Process: malate transmembrane transport (GO:0071423);	1 out of 1011 0.0989119683481701%	12 out of 23596 0.0508560773012375%	1
Biological Process: ethanol oxidation (GO:0006069);	1 out of 1011 0.0989119683481701%	12 out of 23596 0.0508560773012375%	1
Biological Process: diacylglycerol catabolic process (GO:0046340);	1 out of 1011 0.0989119683481701%	12 out of 23596 0.0508560773012375%	1
Biological Process: membrane lipid catabolic process (GO:0046466);	1 out of 1011 0.0989119683481701%	12 out of 23596 0.0508560773012375%	1
Biological Process: negative regulation of smoothened signaling pathway (GO:0045879);	1 out of 1011 0.0989119683481701%	12 out of 23596 0.0508560773012375%	1
Biological Process: response to tumor necrosis factor (GO:0034612);	1 out of 1011 0.0989119683481701%	12 out of 23596 0.0508560773012375%	1
Biological Process: monoacylglycerol catabolic process (GO:0052651);	1 out of 1011 0.0989119683481701%	12 out of 23596 0.0508560773012375%	1
Biological Process: phospholipid dephosphorylation (GO:0046839);	1 out of 1011 0.0989119683481701%	12 out of 23596 0.0508560773012375%	1
Biological Process: RNA transport (GO:0050658);	1 out of 1011 0.0989119683481701%	12 out of 23596 0.0508560773012375%	1
Biological Process: face development (GO:0060324);	1 out of 1011 0.0989119683481701%	12 out of 23596 0.0508560773012375%	1
Biological Process: positive regulation of camalexin biosynthetic process (GO:1901183);	1 out of 1011 0.0989119683481701%	12 out of 23596 0.0508560773012375%	1
Biological Process: female gamete generation (GO:0007292);	1 out of 1011 0.0989119683481701%	12 out of 23596 0.0508560773012375%	1
Biological Process: cholesterol efflux (GO:0033344);	1 out of 1011 0.0989119683481701%	12 out of 23596 0.0508560773012375%	1
Biological Process: protein poly-ADP-ribosylation (GO:0070212);	1 out of 1011 0.0989119683481701%	12 out of 23596 0.0508560773012375%	1
Biological Process: establishment of protein localization to plasma membrane (GO:0090002);	1 out of 1011 0.0989119683481701%	12 out of 23596 0.0508560773012375%	1
Biological Process: vegetative phase change (GO:0010050);	6 out of 1011 0.593471810089021%	120 out of 23596 0.508560773012375%	1
Biological Process: organelle organization (GO:0006996);	17 out of 1011 1.68150346191889%	368 out of 23596 1.55958637057128%	1
Biological Process: positive regulation of cellular metabolic process (GO:0031325);	4 out of 1011 0.395647873392681%	76 out of 23596 0.322088489574504%	1
Biological Process: localization (GO:0051179);	8 out of 1011 0.791295746785361%	165 out of 23596 0.699271062892016%	1
Biological Process: protein-chromophore linkage (GO:0018298);	2 out of 1011 0.19782393669634%	33 out of 23596 0.139854212578403%	1
Biological Process: regulation of stomatal closure (GO:0090333);	2 out of 1011 0.19782393669634%	33 out of 23596 0.139854212578403%	1
Biological Process: cell development (GO:0048468);	9 out of 1011 0.890207715133531%	189 out of 23596 0.800983217494491%	1
Biological Process: signal transduction (GO:0007165);	41 out of 1011 4.05539070227498%	923 out of 23596 3.91167994575352%	1
Biological Process: glycine catabolic process (GO:0006546);	7 out of 1011 0.692383778437191%	145 out of 23596 0.61451093405662%	1
Biological Process: response to cytokinin stimulus (GO:0009735);	7 out of 1011 0.692383778437191%	145 out of 23596 0.61451093405662%	1
Biological Process: positive regulation of macromolecule biosynthetic process (GO:0010557);	2 out of 1011 0.19782393669634%	34 out of 23596 0.144092219020173%	1
Biological Process: stamen filament development (GO:0080086);	2 out of 1011 0.19782393669634%	34 out of 23596 0.144092219020173%	1
Biological Process: defense response by callose deposition (GO:0052542);	6 out of 1011 0.593471810089021%	123 out of 23596 0.521274792337684%	1
Biological Process: macromolecule localization (GO:0033036);	6 out of 1011 0.593471810089021%	123 out of 23596 0.521274792337684%	1
Biological Process: lateral root morphogenesis (GO:0010102);	3 out of 1011 0.29673590504451%	56 out of 23596 0.237328360739108%	1
Biological Process: regulation of meristem development (GO:0048509);	3 out of 1011 0.29673590504451%	56 out of 23596 0.237328360739108%	1
Biological Process: trehalose catabolic process (GO:0005993);	1 out of 1011 0.0989119683481701%	13 out of 23596 0.0550940837430073%	1
Biological Process: intracellular pH elevation (GO:0051454);	1 out of 1011 0.0989119683481701%	13 out of 23596 0.0550940837430073%	1
Biological Process: regulation of hydrolase activity (GO:0051336);	1 out of 1011 0.0989119683481701%	13 out of 23596 0.0550940837430073%	1
Biological Process: protein K29-linked ubiquitination (GO:0035519);	1 out of 1011 0.0989119683481701%	13 out of 23596 0.0550940837430073%	1
Biological Process: regulation of leaf development (GO:2000024);	1 out of 1011 0.0989119683481701%	13 out of 23596 0.0550940837430073%	1
Biological Process: establishment of planar polarity (GO:0001736);	1 out of 1011 0.0989119683481701%	13 out of 23596 0.0550940837430073%	1
Biological Process: nuclear import (GO:0051170);	1 out of 1011 0.0989119683481701%	13 out of 23596 0.0550940837430073%	1
Biological Process: regulation of ARF GTPase activity (GO:0032312);	1 out of 1011 0.0989119683481701%	13 out of 23596 0.0550940837430073%	1
Biological Process: neural tube closure (GO:0001843);	1 out of 1011 0.0989119683481701%	13 out of 23596 0.0550940837430073%	1
Biological Process: AMP transport (GO:0080121);	1 out of 1011 0.0989119683481701%	13 out of 23596 0.0550940837430073%	1
Biological Process: GDP-fucose transport (GO:0015783);	1 out of 1011 0.0989119683481701%	13 out of 23596 0.0550940837430073%	1
Biological Process: stomatal complex development (GO:0010374);	1 out of 1011 0.0989119683481701%	13 out of 23596 0.0550940837430073%	1
Biological Process: response to progesterone stimulus (GO:0032570);	1 out of 1011 0.0989119683481701%	13 out of 23596 0.0550940837430073%	1
Biological Process: nucleotide phosphorylation (GO:0046939);	1 out of 1011 0.0989119683481701%	13 out of 23596 0.0550940837430073%	1
Biological Process: branched-chain amino acid biosynthetic process (GO:0009082);	1 out of 1011 0.0989119683481701%	13 out of 23596 0.0550940837430073%	1
Biological Process: photoreceptor cell maintenance (GO:0045494);	1 out of 1011 0.0989119683481701%	13 out of 23596 0.0550940837430073%	1
Biological Process: cellular manganese ion homeostasis (GO:0030026);	1 out of 1011 0.0989119683481701%	13 out of 23596 0.0550940837430073%	1
Biological Process: cytokinesis, actomyosin contractile ring assembly (GO:0000915);	1 out of 1011 0.0989119683481701%	13 out of 23596 0.0550940837430073%	1
Biological Process: regulation of mitotic metaphase/anaphase transition (GO:0030071);	1 out of 1011 0.0989119683481701%	13 out of 23596 0.0550940837430073%	1
Biological Process: positive regulation of anthocyanin metabolic process (GO:0031539);	1 out of 1011 0.0989119683481701%	13 out of 23596 0.0550940837430073%	1
Biological Process: regulation of phosphate metabolic process (GO:0019220);	1 out of 1011 0.0989119683481701%	13 out of 23596 0.0550940837430073%	1
Biological Process: pyrimidine nucleotide biosynthetic process (GO:0006221);	1 out of 1011 0.0989119683481701%	13 out of 23596 0.0550940837430073%	1
Biological Process: biological regulation (GO:0065007);	10 out of 1011 0.989119683481701%	215 out of 23596 0.911171384980505%	1
Biological Process: fruit dehiscence (GO:0010047);	3 out of 1011 0.29673590504451%	57 out of 23596 0.241566367180878%	1
Biological Process: carbohydrate biosynthetic process (GO:0016051);	3 out of 1011 0.29673590504451%	57 out of 23596 0.241566367180878%	1
Biological Process: suberin biosynthetic process (GO:0010345);	5 out of 1011 0.494559841740851%	102 out of 23596 0.432276657060519%	1
Biological Process: vegetative to reproductive phase transition of meristem (GO:0010228);	29 out of 1011 2.86844708209693%	652 out of 23596 2.7631802000339%	1
Biological Process: regulation of pH (GO:0006885);	2 out of 1011 0.19782393669634%	35 out of 23596 0.148330225461943%	1
Biological Process: root hair initiation (GO:0048766);	2 out of 1011 0.19782393669634%	35 out of 23596 0.148330225461943%	1
Biological Process: regulation of timing of organ formation (GO:0048504);	2 out of 1011 0.19782393669634%	35 out of 23596 0.148330225461943%	1
Biological Process: regulation of biosynthetic process (GO:0009889);	2 out of 1011 0.19782393669634%	35 out of 23596 0.148330225461943%	1
Biological Process: coenzyme biosynthetic process (GO:0009108);	6 out of 1011 0.593471810089021%	125 out of 23596 0.529750805221224%	1
Biological Process: cellulose biosynthetic process (GO:0030244);	11 out of 1011 1.08803165182987%	239 out of 23596 1.01288353958298%	1
Biological Process: response to fungus (GO:0009620);	13 out of 1011 1.28585558852621%	285 out of 23596 1.20783183590439%	1
Biological Process: brassinosteroid mediated signaling pathway (GO:0009742);	10 out of 1011 0.989119683481701%	217 out of 23596 0.919647397864045%	1
Biological Process: cellular iron ion homeostasis (GO:0006879);	3 out of 1011 0.29673590504451%	58 out of 23596 0.245804373622648%	1
Biological Process: cellular response to oxidative stress (GO:0034599);	3 out of 1011 0.29673590504451%	58 out of 23596 0.245804373622648%	1
Biological Process: lipoate metabolic process (GO:0009106);	6 out of 1011 0.593471810089021%	126 out of 23596 0.533988811662994%	1
Biological Process: meristem maintenance (GO:0010073);	8 out of 1011 0.791295746785361%	172 out of 23596 0.728937107984404%	1
Biological Process: farnesyl diphosphate metabolic process (GO:0045338);	1 out of 1011 0.0989119683481701%	14 out of 23596 0.0593320901847771%	1
Biological Process: CTP biosynthetic process (GO:0006241);	1 out of 1011 0.0989119683481701%	14 out of 23596 0.0593320901847771%	1
Biological Process: multicellular organism growth (GO:0035264);	1 out of 1011 0.0989119683481701%	14 out of 23596 0.0593320901847771%	1
Biological Process: photosynthetic electron transport in photosystem II (GO:0009772);	1 out of 1011 0.0989119683481701%	14 out of 23596 0.0593320901847771%	1
Biological Process: SCF complex assembly (GO:0010265);	1 out of 1011 0.0989119683481701%	14 out of 23596 0.0593320901847771%	1
Biological Process: synaptic vesicle endocytosis (GO:0048488);	1 out of 1011 0.0989119683481701%	14 out of 23596 0.0593320901847771%	1
Biological Process: morphogenesis of embryonic epithelium (GO:0016331);	1 out of 1011 0.0989119683481701%	14 out of 23596 0.0593320901847771%	1
Biological Process: response to anoxia (GO:0034059);	1 out of 1011 0.0989119683481701%	14 out of 23596 0.0593320901847771%	1
Biological Process: fatty acid oxidation (GO:0019395);	1 out of 1011 0.0989119683481701%	14 out of 23596 0.0593320901847771%	1
Biological Process: vesicle transport along microtubule (GO:0047496);	1 out of 1011 0.0989119683481701%	14 out of 23596 0.0593320901847771%	1
Biological Process: regulation of auxin mediated signaling pathway (GO:0010928);	1 out of 1011 0.0989119683481701%	14 out of 23596 0.0593320901847771%	1
Biological Process: positive regulation of plant-type hypersensitive response (GO:0034052);	1 out of 1011 0.0989119683481701%	14 out of 23596 0.0593320901847771%	1
Biological Process: meiotic mismatch repair (GO:0000710);	1 out of 1011 0.0989119683481701%	14 out of 23596 0.0593320901847771%	1
Biological Process: regulation of secondary cell wall biogenesis (GO:2000652);	1 out of 1011 0.0989119683481701%	14 out of 23596 0.0593320901847771%	1
Biological Process: lipid glycosylation (GO:0030259);	1 out of 1011 0.0989119683481701%	14 out of 23596 0.0593320901847771%	1
Biological Process: actin cytoskeleton organization (GO:0030036);	4 out of 1011 0.395647873392681%	81 out of 23596 0.343278521783353%	1
Biological Process: primary root development (GO:0080022);	4 out of 1011 0.395647873392681%	81 out of 23596 0.343278521783353%	1
Biological Process: long-day photoperiodism, flowering (GO:0048574);	2 out of 1011 0.19782393669634%	36 out of 23596 0.152568231903712%	1
Biological Process: innate immune response (GO:0045087);	19 out of 1011 1.87932739861523%	426 out of 23596 1.80539074419393%	1
Biological Process: cell wall biogenesis (GO:0042546);	7 out of 1011 0.692383778437191%	150 out of 23596 0.635700966265469%	1
Biological Process: dephosphorylation (GO:0016311);	3 out of 1011 0.29673590504451%	59 out of 23596 0.250042380064418%	1
Biological Process: potassium ion transmembrane transport (GO:0071805);	3 out of 1011 0.29673590504451%	59 out of 23596 0.250042380064418%	1
Biological Process: transpiration (GO:0010148);	3 out of 1011 0.29673590504451%	59 out of 23596 0.250042380064418%	1
Biological Process: pathogenesis (GO:0009405);	4 out of 1011 0.395647873392681%	82 out of 23596 0.347516528225123%	1
Biological Process: coumarin biosynthetic process (GO:0009805);	13 out of 1011 1.28585558852621%	289 out of 23596 1.22478386167147%	1
Biological Process: regulation of translation (GO:0006417);	6 out of 1011 0.593471810089021%	128 out of 23596 0.542464824546533%	1
Biological Process: regulation of seed maturation (GO:2000034);	2 out of 1011 0.19782393669634%	37 out of 23596 0.156806238345482%	1
Biological Process: ubiquinone biosynthetic process (GO:0006744);	2 out of 1011 0.19782393669634%	37 out of 23596 0.156806238345482%	1
Biological Process: oligosaccharide metabolic process (GO:0009311);	2 out of 1011 0.19782393669634%	37 out of 23596 0.156806238345482%	1
Biological Process: negative regulation of vulval development (GO:0040027);	2 out of 1011 0.19782393669634%	37 out of 23596 0.156806238345482%	1
Biological Process: cellular copper ion homeostasis (GO:0006878);	2 out of 1011 0.19782393669634%	37 out of 23596 0.156806238345482%	1
Biological Process: regulation of systemic acquired resistance (GO:0010112);	2 out of 1011 0.19782393669634%	37 out of 23596 0.156806238345482%	1
Biological Process: virus induced gene silencing (GO:0009616);	10 out of 1011 0.989119683481701%	221 out of 23596 0.936599423631124%	1
Biological Process: centrosome duplication (GO:0051298);	3 out of 1011 0.29673590504451%	60 out of 23596 0.254280386506188%	1
Biological Process: cell death (GO:0008219);	5 out of 1011 0.494559841740851%	106 out of 23596 0.449228682827598%	1
Biological Process: cellular biosynthetic process (GO:0044249);	24 out of 1011 2.37388724035608%	546 out of 23596 2.31395151720631%	1
Biological Process: cellular metal ion homeostasis (GO:0006875);	1 out of 1011 0.0989119683481701%	15 out of 23596 0.0635700966265469%	1
Biological Process: response to hexose stimulus (GO:0009746);	1 out of 1011 0.0989119683481701%	15 out of 23596 0.0635700966265469%	1
Biological Process: purine ribonucleotide metabolic process (GO:0009150);	1 out of 1011 0.0989119683481701%	15 out of 23596 0.0635700966265469%	1
Biological Process: pronephric nephron tubule development (GO:0039020);	1 out of 1011 0.0989119683481701%	15 out of 23596 0.0635700966265469%	1
Biological Process: galactose transport (GO:0015757);	1 out of 1011 0.0989119683481701%	15 out of 23596 0.0635700966265469%	1
Biological Process: plastid translation (GO:0032544);	1 out of 1011 0.0989119683481701%	15 out of 23596 0.0635700966265469%	1
Biological Process: protein K27-linked ubiquitination (GO:0044314);	1 out of 1011 0.0989119683481701%	15 out of 23596 0.0635700966265469%	1
Biological Process: coenzyme A metabolic process (GO:0015936);	1 out of 1011 0.0989119683481701%	15 out of 23596 0.0635700966265469%	1
Biological Process: response to insulin stimulus (GO:0032868);	1 out of 1011 0.0989119683481701%	15 out of 23596 0.0635700966265469%	1
Biological Process: positive regulation of Ras protein signal transduction (GO:0046579);	1 out of 1011 0.0989119683481701%	15 out of 23596 0.0635700966265469%	1
Biological Process: immune effector process (GO:0002252);	1 out of 1011 0.0989119683481701%	15 out of 23596 0.0635700966265469%	1
Biological Process: response to manganese ion (GO:0010042);	1 out of 1011 0.0989119683481701%	15 out of 23596 0.0635700966265469%	1
Biological Process: ADP transport (GO:0015866);	1 out of 1011 0.0989119683481701%	15 out of 23596 0.0635700966265469%	1
Biological Process: macromolecular complex subunit organization (GO:0043933);	1 out of 1011 0.0989119683481701%	15 out of 23596 0.0635700966265469%	1
Biological Process: cellular response to cholesterol (GO:0071397);	1 out of 1011 0.0989119683481701%	15 out of 23596 0.0635700966265469%	1
Biological Process: phloem nitrate loading (GO:0090408);	1 out of 1011 0.0989119683481701%	15 out of 23596 0.0635700966265469%	1
Biological Process: cellular polysaccharide metabolic process (GO:0044264);	1 out of 1011 0.0989119683481701%	15 out of 23596 0.0635700966265469%	1
Biological Process: negative regulation of cell division (GO:0051782);	3 out of 1011 0.29673590504451%	61 out of 23596 0.258518392947957%	1
Biological Process: cutin biosynthetic process (GO:0010143);	2 out of 1011 0.19782393669634%	38 out of 23596 0.161044244787252%	1
Biological Process: regulation of organ morphogenesis (GO:2000027);	2 out of 1011 0.19782393669634%	38 out of 23596 0.161044244787252%	1
Biological Process: cellular response to extracellular stimulus (GO:0031668);	2 out of 1011 0.19782393669634%	38 out of 23596 0.161044244787252%	1
Biological Process: cellular protein metabolic process (GO:0044267);	9 out of 1011 0.890207715133531%	201 out of 23596 0.851839294795728%	1
Biological Process: regulation of cell cycle process (GO:0010564);	5 out of 1011 0.494559841740851%	108 out of 23596 0.457704695711137%	1
Biological Process: sucrose biosynthetic process (GO:0005986);	3 out of 1011 0.29673590504451%	62 out of 23596 0.262756399389727%	1
Biological Process: nucleobase-containing compound metabolic process (GO:0006139);	6 out of 1011 0.593471810089021%	132 out of 23596 0.559416850313612%	1
Biological Process: cellular response to cold (GO:0070417);	2 out of 1011 0.19782393669634%	39 out of 23596 0.165282251229022%	1
Biological Process: meristem structural organization (GO:0009933);	8 out of 1011 0.791295746785361%	179 out of 23596 0.758603153076793%	1
Biological Process: positive regulation of protein dephosphorylation (GO:0035307);	1 out of 1011 0.0989119683481701%	16 out of 23596 0.0678081030683167%	1
Biological Process: long-chain fatty acid biosynthetic process (GO:0042759);	1 out of 1011 0.0989119683481701%	16 out of 23596 0.0678081030683167%	1
Biological Process: phosphatidylcholine metabolic process (GO:0046470);	1 out of 1011 0.0989119683481701%	16 out of 23596 0.0678081030683167%	1
Biological Process: cyanidin 3-O-glucoside metabolic process (GO:1901038);	1 out of 1011 0.0989119683481701%	16 out of 23596 0.0678081030683167%	1
Biological Process: hindbrain development (GO:0030902);	1 out of 1011 0.0989119683481701%	16 out of 23596 0.0678081030683167%	1
Biological Process: L-phenylalanine biosynthetic process (GO:0009094);	1 out of 1011 0.0989119683481701%	16 out of 23596 0.0678081030683167%	1
Biological Process: iron ion transmembrane transport (GO:0034755);	1 out of 1011 0.0989119683481701%	16 out of 23596 0.0678081030683167%	1
Biological Process: endoplasmic reticulum tubular network organization (GO:0071786);	1 out of 1011 0.0989119683481701%	16 out of 23596 0.0678081030683167%	1
Biological Process: nucleosome positioning (GO:0016584);	1 out of 1011 0.0989119683481701%	16 out of 23596 0.0678081030683167%	1
Biological Process: regulation of transcription from RNA polymerase II promoter in response to hypoxia (GO:0061418);	1 out of 1011 0.0989119683481701%	16 out of 23596 0.0678081030683167%	1
Biological Process: xyloglucan biosynthetic process (GO:0009969);	1 out of 1011 0.0989119683481701%	16 out of 23596 0.0678081030683167%	1
Biological Process: inositol phosphate metabolic process (GO:0043647);	1 out of 1011 0.0989119683481701%	16 out of 23596 0.0678081030683167%	1
Biological Process: butyrate metabolic process (GO:0019605);	1 out of 1011 0.0989119683481701%	16 out of 23596 0.0678081030683167%	1
Biological Process: retinal metabolic process (GO:0042574);	1 out of 1011 0.0989119683481701%	16 out of 23596 0.0678081030683167%	1
Biological Process: hypotonic salinity response (GO:0042539);	1 out of 1011 0.0989119683481701%	16 out of 23596 0.0678081030683167%	1
Biological Process: cellulose microfibril organization (GO:0010215);	1 out of 1011 0.0989119683481701%	16 out of 23596 0.0678081030683167%	1
Biological Process: lung development (GO:0030324);	1 out of 1011 0.0989119683481701%	16 out of 23596 0.0678081030683167%	1
Biological Process: 1-aminocyclopropane-1-carboxylate biosynthetic process (GO:0042218);	1 out of 1011 0.0989119683481701%	16 out of 23596 0.0678081030683167%	1
Biological Process: tyrosine biosynthetic process (GO:0006571);	1 out of 1011 0.0989119683481701%	16 out of 23596 0.0678081030683167%	1
Biological Process: rRNA transcription (GO:0009303);	1 out of 1011 0.0989119683481701%	16 out of 23596 0.0678081030683167%	1
Biological Process: regulation of neuron apoptotic process (GO:0043523);	1 out of 1011 0.0989119683481701%	16 out of 23596 0.0678081030683167%	1
Biological Process: hydrogen peroxide transmembrane transport (GO:0080170);	1 out of 1011 0.0989119683481701%	16 out of 23596 0.0678081030683167%	1
Biological Process: lysine transport (GO:0015819);	1 out of 1011 0.0989119683481701%	16 out of 23596 0.0678081030683167%	1
Biological Process: threonine catabolic process (GO:0006567);	1 out of 1011 0.0989119683481701%	16 out of 23596 0.0678081030683167%	1
Biological Process: regulation of cytokinesis (GO:0032465);	1 out of 1011 0.0989119683481701%	16 out of 23596 0.0678081030683167%	1
Biological Process: water homeostasis (GO:0030104);	1 out of 1011 0.0989119683481701%	16 out of 23596 0.0678081030683167%	1
Biological Process: glycogen catabolic process (GO:0005980);	1 out of 1011 0.0989119683481701%	16 out of 23596 0.0678081030683167%	1
Biological Process: lithium ion transport (GO:0010351);	4 out of 1011 0.395647873392681%	86 out of 23596 0.364468553992202%	1
Biological Process: chromatin assembly or disassembly (GO:0006333);	4 out of 1011 0.395647873392681%	86 out of 23596 0.364468553992202%	1
Biological Process: regulation of meiosis (GO:0040020);	4 out of 1011 0.395647873392681%	86 out of 23596 0.364468553992202%	1
Biological Process: glucose metabolic process (GO:0006006);	3 out of 1011 0.29673590504451%	63 out of 23596 0.266994405831497%	1
Biological Process: DNA replication (GO:0006260);	9 out of 1011 0.890207715133531%	205 out of 23596 0.868791320562807%	1
Biological Process: protein autophosphorylation (GO:0046777);	39 out of 1011 3.85756676557863%	909 out of 23596 3.85234785556874%	1
Biological Process: response to metal ion (GO:0010038);	3 out of 1011 0.29673590504451%	64 out of 23596 0.271232412273267%	1
Biological Process: mitochondrion morphogenesis (GO:0070584);	1 out of 1011 0.0989119683481701%	17 out of 23596 0.0720461095100865%	1
Biological Process: detection of mechanical stimulus (GO:0050982);	1 out of 1011 0.0989119683481701%	17 out of 23596 0.0720461095100865%	1
Biological Process: UDP-glucose transport (GO:0015786);	1 out of 1011 0.0989119683481701%	17 out of 23596 0.0720461095100865%	1
Biological Process: activation of MAPK activity involved in osmosensory signaling pathway (GO:0000169);	1 out of 1011 0.0989119683481701%	17 out of 23596 0.0720461095100865%	1
Biological Process: UDP-galactose transmembrane transport (GO:0072334);	1 out of 1011 0.0989119683481701%	17 out of 23596 0.0720461095100865%	1
Biological Process: glycosaminoglycan biosynthetic process (GO:0006024);	1 out of 1011 0.0989119683481701%	17 out of 23596 0.0720461095100865%	1
Biological Process: cellular response to nitrate (GO:0071249);	1 out of 1011 0.0989119683481701%	17 out of 23596 0.0720461095100865%	1
Biological Process: arabinose metabolic process (GO:0019566);	1 out of 1011 0.0989119683481701%	17 out of 23596 0.0720461095100865%	1
Biological Process: nucleosome disassembly (GO:0006337);	1 out of 1011 0.0989119683481701%	17 out of 23596 0.0720461095100865%	1
Biological Process: malate metabolic process (GO:0006108);	1 out of 1011 0.0989119683481701%	17 out of 23596 0.0720461095100865%	1
Biological Process: silicate transport (GO:0015708);	1 out of 1011 0.0989119683481701%	17 out of 23596 0.0720461095100865%	1
Biological Process: filamentous growth of a population of unicellular organisms in response to neutral pH (GO:0036178);	1 out of 1011 0.0989119683481701%	17 out of 23596 0.0720461095100865%	1
Biological Process: copper ion transmembrane transport (GO:0035434);	1 out of 1011 0.0989119683481701%	17 out of 23596 0.0720461095100865%	1
Biological Process: vitamin metabolic process (GO:0006766);	7 out of 1011 0.692383778437191%	159 out of 23596 0.673843024241397%	1
Biological Process: ATP catabolic process (GO:0006200);	26 out of 1011 2.57171117705242%	606 out of 23596 2.56823190371249%	1
Biological Process: response to stimulus (GO:0050896);	30 out of 1011 2.9673590504451%	700 out of 23596 2.96660450923885%	1
Biological Process: phagocytosis (GO:0006909);	2 out of 1011 0.19782393669634%	41 out of 23596 0.173758264112561%	1
Biological Process: negative regulation of transcription, DNA-dependent (GO:0045892);	20 out of 1011 1.9782393669634%	466 out of 23596 1.97491100186472%	1
Biological Process: carbohydrate transmembrane transport (GO:0034219);	3 out of 1011 0.29673590504451%	65 out of 23596 0.275470418715036%	1
Biological Process: pollen exine formation (GO:0010584);	8 out of 1011 0.791295746785361%	185 out of 23596 0.784031191727411%	1
Biological Process: sugar mediated signaling pathway (GO:0010182);	12 out of 1011 1.18694362017804%	280 out of 23596 1.18664180369554%	1
Biological Process: monocarboxylic acid biosynthetic process (GO:0072330);	3 out of 1011 0.29673590504451%	66 out of 23596 0.279708425156806%	1
Biological Process: protein localization (GO:0008104);	4 out of 1011 0.395647873392681%	90 out of 23596 0.381420579759281%	1
Biological Process: geranyl diphosphate metabolic process (GO:0033383);	2 out of 1011 0.19782393669634%	42 out of 23596 0.177996270554331%	1
Biological Process: negative regulation of macromolecule metabolic process (GO:0010605);	2 out of 1011 0.19782393669634%	42 out of 23596 0.177996270554331%	1
Biological Process: phloem transport (GO:0010233);	2 out of 1011 0.19782393669634%	42 out of 23596 0.177996270554331%	1
Biological Process: isoprenoid biosynthetic process (GO:0008299);	2 out of 1011 0.19782393669634%	42 out of 23596 0.177996270554331%	1
Biological Process: response to L-ascorbic acid (GO:0033591);	1 out of 1011 0.0989119683481701%	18 out of 23596 0.0762841159518562%	1
Biological Process: borate transport (GO:0046713);	1 out of 1011 0.0989119683481701%	18 out of 23596 0.0762841159518562%	1
Biological Process: histone H2A acetylation (GO:0043968);	1 out of 1011 0.0989119683481701%	18 out of 23596 0.0762841159518562%	1
Biological Process: nuclear export (GO:0051168);	1 out of 1011 0.0989119683481701%	18 out of 23596 0.0762841159518562%	1
Biological Process: response to growth hormone stimulus (GO:0060416);	1 out of 1011 0.0989119683481701%	18 out of 23596 0.0762841159518562%	1
Biological Process: response to mannitol stimulus (GO:0010555);	1 out of 1011 0.0989119683481701%	18 out of 23596 0.0762841159518562%	1
Biological Process: cyanide metabolic process (GO:0019499);	1 out of 1011 0.0989119683481701%	18 out of 23596 0.0762841159518562%	1
Biological Process: chloroplast-nucleus signaling pathway (GO:0010019);	1 out of 1011 0.0989119683481701%	18 out of 23596 0.0762841159518562%	1
Biological Process: forebrain development (GO:0030900);	1 out of 1011 0.0989119683481701%	18 out of 23596 0.0762841159518562%	1
Biological Process: chaperone-mediated protein complex assembly (GO:0051131);	1 out of 1011 0.0989119683481701%	18 out of 23596 0.0762841159518562%	1
Biological Process: entrainment of circadian clock (GO:0009649);	1 out of 1011 0.0989119683481701%	18 out of 23596 0.0762841159518562%	1
Biological Process: instar larval development (GO:0002168);	1 out of 1011 0.0989119683481701%	18 out of 23596 0.0762841159518562%	1
Biological Process: cellular response to abiotic stimulus (GO:0071214);	1 out of 1011 0.0989119683481701%	18 out of 23596 0.0762841159518562%	1
Biological Process: glycosaminoglycan metabolic process (GO:0030203);	1 out of 1011 0.0989119683481701%	18 out of 23596 0.0762841159518562%	1
Biological Process: cellular response to light stimulus (GO:0071482);	1 out of 1011 0.0989119683481701%	18 out of 23596 0.0762841159518562%	1
Biological Process: detection of calcium ion (GO:0005513);	1 out of 1011 0.0989119683481701%	18 out of 23596 0.0762841159518562%	1
Biological Process: cardiac muscle tissue development (GO:0048738);	1 out of 1011 0.0989119683481701%	18 out of 23596 0.0762841159518562%	1
Biological Process: organelle assembly (GO:0070925);	1 out of 1011 0.0989119683481701%	18 out of 23596 0.0762841159518562%	1
Biological Process: growth (GO:0040007);	17 out of 1011 1.68150346191889%	400 out of 23596 1.69520257670792%	1
Biological Process: protein homooligomerization (GO:0051260);	4 out of 1011 0.395647873392681%	91 out of 23596 0.385658586201051%	1
Biological Process: cotyledon development (GO:0048825);	8 out of 1011 0.791295746785361%	187 out of 23596 0.792507204610951%	1
Biological Process: liver development (GO:0001889);	2 out of 1011 0.19782393669634%	43 out of 23596 0.182234276996101%	1
Biological Process: regulation of cellular biosynthetic process (GO:0031326);	2 out of 1011 0.19782393669634%	43 out of 23596 0.182234276996101%	1
Biological Process: microgametogenesis (GO:0055046);	2 out of 1011 0.19782393669634%	43 out of 23596 0.182234276996101%	1
Biological Process: response to zinc ion (GO:0010043);	12 out of 1011 1.18694362017804%	283 out of 23596 1.19935582302085%	1
Biological Process: protein phosphorylation (GO:0006468);	43 out of 1011 4.25321463897132%	1016 out of 23596 4.30581454483811%	1
Biological Process: terpenoid biosynthetic process (GO:0016114);	3 out of 1011 0.29673590504451%	68 out of 23596 0.288184438040346%	1
Biological Process: sulfur compound metabolic process (GO:0006790);	3 out of 1011 0.29673590504451%	68 out of 23596 0.288184438040346%	1
Biological Process: homeostatic process (GO:0042592);	1 out of 1011 0.0989119683481701%	19 out of 23596 0.080522122393626%	1
Biological Process: endonucleolytic cleavage involved in rRNA processing (GO:0000478);	1 out of 1011 0.0989119683481701%	19 out of 23596 0.080522122393626%	1
Biological Process: macromolecule catabolic process (GO:0009057);	1 out of 1011 0.0989119683481701%	19 out of 23596 0.080522122393626%	1
Biological Process: heterochromatin assembly (GO:0031507);	1 out of 1011 0.0989119683481701%	19 out of 23596 0.080522122393626%	1
Biological Process: positive regulation of protein kinase activity (GO:0045860);	1 out of 1011 0.0989119683481701%	19 out of 23596 0.080522122393626%	1
Biological Process: copper ion transport (GO:0006825);	1 out of 1011 0.0989119683481701%	19 out of 23596 0.080522122393626%	1
Biological Process: protein K6-linked ubiquitination (GO:0085020);	1 out of 1011 0.0989119683481701%	19 out of 23596 0.080522122393626%	1
Biological Process: spermidine hydroxycinnamate conjugate biosynthetic process (GO:0080088);	1 out of 1011 0.0989119683481701%	19 out of 23596 0.080522122393626%	1
Biological Process: photosynthetic electron transport chain (GO:0009767);	1 out of 1011 0.0989119683481701%	19 out of 23596 0.080522122393626%	1
Biological Process: regulation of actin filament polymerization (GO:0030833);	1 out of 1011 0.0989119683481701%	19 out of 23596 0.080522122393626%	1
Biological Process: negative regulation of biological process (GO:0048519);	12 out of 1011 1.18694362017804%	285 out of 23596 1.20783183590439%	1
Biological Process: cell wall macromolecule catabolic process (GO:0016998);	2 out of 1011 0.19782393669634%	44 out of 23596 0.186472283437871%	1
Biological Process: unsaturated fatty acid metabolic process (GO:0033559);	2 out of 1011 0.19782393669634%	44 out of 23596 0.186472283437871%	1
Biological Process: negative regulation of cellular metabolic process (GO:0031324);	2 out of 1011 0.19782393669634%	44 out of 23596 0.186472283437871%	1
Biological Process: anther dehiscence (GO:0009901);	4 out of 1011 0.395647873392681%	93 out of 23596 0.394134599084591%	1
Biological Process: microtubule-based process (GO:0007017);	3 out of 1011 0.29673590504451%	69 out of 23596 0.292422444482116%	1
Biological Process: blue light signaling pathway (GO:0009785);	3 out of 1011 0.29673590504451%	69 out of 23596 0.292422444482116%	1
Biological Process: response to chemical stimulus (GO:0042221);	8 out of 1011 0.791295746785361%	191 out of 23596 0.80945923037803%	1
Biological Process: regulation of seed growth (GO:0080113);	2 out of 1011 0.19782393669634%	45 out of 23596 0.190710289879641%	1
Biological Process: de-etiolation (GO:0009704);	2 out of 1011 0.19782393669634%	45 out of 23596 0.190710289879641%	1
Biological Process: regulation of anthocyanin metabolic process (GO:0031537);	2 out of 1011 0.19782393669634%	45 out of 23596 0.190710289879641%	1
Biological Process: double-strand break repair (GO:0006302);	5 out of 1011 0.494559841740851%	119 out of 23596 0.504322766570605%	1
Biological Process: regulation of lipid metabolic process (GO:0019216);	3 out of 1011 0.29673590504451%	70 out of 23596 0.296660450923885%	1
Biological Process: zinc ion transport (GO:0006829);	1 out of 1011 0.0989119683481701%	20 out of 23596 0.0847601288353958%	1
Biological Process: negative regulation of neuron differentiation (GO:0045665);	1 out of 1011 0.0989119683481701%	20 out of 23596 0.0847601288353958%	1
Biological Process: petal epidermis patterning (GO:0080172);	1 out of 1011 0.0989119683481701%	20 out of 23596 0.0847601288353958%	1
Biological Process: seedling development (GO:0090351);	1 out of 1011 0.0989119683481701%	20 out of 23596 0.0847601288353958%	1
Biological Process: positive regulation of programmed cell death (GO:0043068);	1 out of 1011 0.0989119683481701%	20 out of 23596 0.0847601288353958%	1
Biological Process: SCF-dependent proteasomal ubiquitin-dependent protein catabolic process (GO:0031146);	1 out of 1011 0.0989119683481701%	20 out of 23596 0.0847601288353958%	1
Biological Process: 'de novo' posttranslational protein folding (GO:0051084);	1 out of 1011 0.0989119683481701%	20 out of 23596 0.0847601288353958%	1
Biological Process: negative gravitropism (GO:0009959);	1 out of 1011 0.0989119683481701%	20 out of 23596 0.0847601288353958%	1
Biological Process: cholesterol homeostasis (GO:0042632);	1 out of 1011 0.0989119683481701%	20 out of 23596 0.0847601288353958%	1
Biological Process: platelet degranulation (GO:0002576);	1 out of 1011 0.0989119683481701%	20 out of 23596 0.0847601288353958%	1
Biological Process: regulation of reproductive process (GO:2000241);	1 out of 1011 0.0989119683481701%	20 out of 23596 0.0847601288353958%	1
Biological Process: positive regulation of cell differentiation (GO:0045597);	1 out of 1011 0.0989119683481701%	20 out of 23596 0.0847601288353958%	1
Biological Process: induced systemic resistance, ethylene mediated signaling pathway (GO:0009866);	1 out of 1011 0.0989119683481701%	20 out of 23596 0.0847601288353958%	1
Biological Process: cutin transport (GO:0080051);	1 out of 1011 0.0989119683481701%	20 out of 23596 0.0847601288353958%	1
Biological Process: ovarian follicle development (GO:0001541);	1 out of 1011 0.0989119683481701%	20 out of 23596 0.0847601288353958%	1
Biological Process: cellular response to nitrogen starvation (GO:0006995);	6 out of 1011 0.593471810089021%	144 out of 23596 0.61027292761485%	1
Biological Process: histone modification (GO:0016570);	6 out of 1011 0.593471810089021%	144 out of 23596 0.61027292761485%	1
Biological Process: gene silencing by RNA (GO:0031047);	5 out of 1011 0.494559841740851%	120 out of 23596 0.508560773012375%	1
Biological Process: arsenite transport (GO:0015700);	3 out of 1011 0.29673590504451%	71 out of 23596 0.300898457365655%	1
Biological Process: chiasma assembly (GO:0051026);	2 out of 1011 0.19782393669634%	46 out of 23596 0.19494829632141%	1
Biological Process: ethylene biosynthetic process (GO:0009693);	9 out of 1011 0.890207715133531%	218 out of 23596 0.923885404305815%	1
Biological Process: regulation of gene expression (GO:0010468);	12 out of 1011 1.18694362017804%	291 out of 23596 1.23325987455501%	1
Biological Process: plant-type cell wall modification (GO:0009827);	17 out of 1011 1.68150346191889%	412 out of 23596 1.74605865400915%	1
Biological Process: negative regulation of multicellular organism growth (GO:0040015);	1 out of 1011 0.0989119683481701%	21 out of 23596 0.0889981352771656%	1
Biological Process: benzoate metabolic process (GO:0018874);	1 out of 1011 0.0989119683481701%	21 out of 23596 0.0889981352771656%	1
Biological Process: regulation of potassium ion transport (GO:0043266);	1 out of 1011 0.0989119683481701%	21 out of 23596 0.0889981352771656%	1
Biological Process: negative regulation of leaf senescence (GO:1900056);	1 out of 1011 0.0989119683481701%	21 out of 23596 0.0889981352771656%	1
Biological Process: phosphatidylinositol dephosphorylation (GO:0046856);	1 out of 1011 0.0989119683481701%	21 out of 23596 0.0889981352771656%	1
Biological Process: ATP transport (GO:0015867);	1 out of 1011 0.0989119683481701%	21 out of 23596 0.0889981352771656%	1
Biological Process: plasmodesmata-mediated intercellular transport (GO:0010497);	1 out of 1011 0.0989119683481701%	21 out of 23596 0.0889981352771656%	1
Biological Process: cardiac muscle cell development (GO:0055013);	1 out of 1011 0.0989119683481701%	21 out of 23596 0.0889981352771656%	1
Biological Process: sesquiterpene biosynthetic process (GO:0051762);	1 out of 1011 0.0989119683481701%	21 out of 23596 0.0889981352771656%	1
Biological Process: positive regulation of DNA binding (GO:0043388);	1 out of 1011 0.0989119683481701%	21 out of 23596 0.0889981352771656%	1
Biological Process: cellular aldehyde metabolic process (GO:0006081);	1 out of 1011 0.0989119683481701%	21 out of 23596 0.0889981352771656%	1
Biological Process: positive regulation of cellular component organization (GO:0051130);	1 out of 1011 0.0989119683481701%	21 out of 23596 0.0889981352771656%	1
Biological Process: chromatin remodeling (GO:0006338);	4 out of 1011 0.395647873392681%	97 out of 23596 0.41108662485167%	1
Biological Process: regulation of immune response (GO:0050776);	2 out of 1011 0.19782393669634%	47 out of 23596 0.19918630276318%	1
Biological Process: regulation of cellular metabolic process (GO:0031323);	10 out of 1011 0.989119683481701%	245 out of 23596 1.0383115782336%	1
Biological Process: positive regulation of transcription, DNA-dependent (GO:0045893);	50 out of 1011 4.94559841740851%	1202 out of 23596 5.09408374300729%	1
Biological Process: gene silencing (GO:0016458);	4 out of 1011 0.395647873392681%	98 out of 23596 0.41532463129344%	1
Biological Process: fruit development (GO:0010154);	4 out of 1011 0.395647873392681%	98 out of 23596 0.41532463129344%	1
Biological Process: mitochondrial transport (GO:0006839);	3 out of 1011 0.29673590504451%	73 out of 23596 0.309374470249195%	1
Biological Process: anatomical structure development (GO:0048856);	16 out of 1011 1.58259149357072%	391 out of 23596 1.65706051873199%	1
Biological Process: epidermal cell fate specification (GO:0009957);	2 out of 1011 0.19782393669634%	48 out of 23596 0.20342430920495%	1
Biological Process: cellular response to heat (GO:0034605);	4 out of 1011 0.395647873392681%	99 out of 23596 0.419562637735209%	1
Biological Process: mitotic recombination (GO:0006312);	4 out of 1011 0.395647873392681%	99 out of 23596 0.419562637735209%	1
Biological Process: negative regulation of response to water deprivation (GO:0080148);	1 out of 1011 0.0989119683481701%	22 out of 23596 0.0932361417189354%	1
Biological Process: regulation of response to nutrient levels (GO:0032107);	1 out of 1011 0.0989119683481701%	22 out of 23596 0.0932361417189354%	1
Biological Process: cellular heat acclimation (GO:0070370);	1 out of 1011 0.0989119683481701%	22 out of 23596 0.0932361417189354%	1
Biological Process: cellular response to boron-containing substance levels (GO:0080029);	1 out of 1011 0.0989119683481701%	22 out of 23596 0.0932361417189354%	1
Biological Process: Fc-gamma receptor signaling pathway involved in phagocytosis (GO:0038096);	1 out of 1011 0.0989119683481701%	22 out of 23596 0.0932361417189354%	1
Biological Process: cellular response to freezing (GO:0071497);	1 out of 1011 0.0989119683481701%	22 out of 23596 0.0932361417189354%	1
Biological Process: cellular respiration (GO:0045333);	1 out of 1011 0.0989119683481701%	22 out of 23596 0.0932361417189354%	1
Biological Process: activation of JUN kinase activity (GO:0007257);	1 out of 1011 0.0989119683481701%	22 out of 23596 0.0932361417189354%	1
Biological Process: monoterpene biosynthetic process (GO:0043693);	1 out of 1011 0.0989119683481701%	22 out of 23596 0.0932361417189354%	1
Biological Process: cleistothecium development (GO:0070791);	1 out of 1011 0.0989119683481701%	22 out of 23596 0.0932361417189354%	1
Biological Process: adaxial/abaxial pattern specification (GO:0009955);	1 out of 1011 0.0989119683481701%	22 out of 23596 0.0932361417189354%	1
Biological Process: acetate metabolic process (GO:0006083);	1 out of 1011 0.0989119683481701%	22 out of 23596 0.0932361417189354%	1
Biological Process: cholesterol biosynthetic process (GO:0006695);	1 out of 1011 0.0989119683481701%	22 out of 23596 0.0932361417189354%	1
Biological Process: glycerophospholipid biosynthetic process (GO:0046474);	1 out of 1011 0.0989119683481701%	22 out of 23596 0.0932361417189354%	1
Biological Process: regulation of immune system process (GO:0002682);	1 out of 1011 0.0989119683481701%	22 out of 23596 0.0932361417189354%	1
Biological Process: cellular response to endogenous stimulus (GO:0071495);	1 out of 1011 0.0989119683481701%	22 out of 23596 0.0932361417189354%	1
Biological Process: heart morphogenesis (GO:0003007);	1 out of 1011 0.0989119683481701%	22 out of 23596 0.0932361417189354%	1
Biological Process: activation of MAPK activity (GO:0000187);	1 out of 1011 0.0989119683481701%	22 out of 23596 0.0932361417189354%	1
Biological Process: sulfur compound biosynthetic process (GO:0044272);	4 out of 1011 0.395647873392681%	100 out of 23596 0.423800644176979%	1
Biological Process: xenobiotic metabolic process (GO:0006805);	2 out of 1011 0.19782393669634%	49 out of 23596 0.20766231564672%	1
Biological Process: cell projection organization (GO:0030030);	2 out of 1011 0.19782393669634%	49 out of 23596 0.20766231564672%	1
Biological Process: cellular zinc ion homeostasis (GO:0006882);	2 out of 1011 0.19782393669634%	49 out of 23596 0.20766231564672%	1
Biological Process: response to toxin (GO:0009636);	3 out of 1011 0.29673590504451%	75 out of 23596 0.317850483132734%	1
Biological Process: heterocycle metabolic process (GO:0046483);	4 out of 1011 0.395647873392681%	101 out of 23596 0.428038650618749%	1
Biological Process: pigment metabolic process (GO:0042440);	1 out of 1011 0.0989119683481701%	23 out of 23596 0.0974741481607052%	1
Biological Process: chloride transport (GO:0006821);	1 out of 1011 0.0989119683481701%	23 out of 23596 0.0974741481607052%	1
Biological Process: mitotic sister chromatid segregation (GO:0000070);	1 out of 1011 0.0989119683481701%	23 out of 23596 0.0974741481607052%	1
Biological Process: maintenance of floral organ identity (GO:0048497);	1 out of 1011 0.0989119683481701%	23 out of 23596 0.0974741481607052%	1
Biological Process: cellular response to mechanical stimulus (GO:0071260);	1 out of 1011 0.0989119683481701%	23 out of 23596 0.0974741481607052%	1
Biological Process: regulation of protein phosphorylation (GO:0001932);	1 out of 1011 0.0989119683481701%	23 out of 23596 0.0974741481607052%	1
Biological Process: tyrosine catabolic process (GO:0006572);	1 out of 1011 0.0989119683481701%	23 out of 23596 0.0974741481607052%	1
Biological Process: terpene metabolic process (GO:0042214);	1 out of 1011 0.0989119683481701%	23 out of 23596 0.0974741481607052%	1
Biological Process: response to steroid hormone stimulus (GO:0048545);	1 out of 1011 0.0989119683481701%	23 out of 23596 0.0974741481607052%	1
Biological Process: hydrogen peroxide-mediated programmed cell death (GO:0010421);	1 out of 1011 0.0989119683481701%	23 out of 23596 0.0974741481607052%	1
Biological Process: cellular response to fatty acid (GO:0071398);	1 out of 1011 0.0989119683481701%	23 out of 23596 0.0974741481607052%	1
Biological Process: regulation of signaling (GO:0023051);	1 out of 1011 0.0989119683481701%	23 out of 23596 0.0974741481607052%	1
Biological Process: zinc ion transmembrane transport (GO:0071577);	1 out of 1011 0.0989119683481701%	23 out of 23596 0.0974741481607052%	1
Biological Process: histone H4-K16 acetylation (GO:0043984);	1 out of 1011 0.0989119683481701%	23 out of 23596 0.0974741481607052%	1
Biological Process: nodulation (GO:0009877);	1 out of 1011 0.0989119683481701%	23 out of 23596 0.0974741481607052%	1
Biological Process: response to molecule of fungal origin (GO:0002238);	2 out of 1011 0.19782393669634%	50 out of 23596 0.21190032208849%	1
Biological Process: secondary shoot formation (GO:0010223);	6 out of 1011 0.593471810089021%	152 out of 23596 0.644176979149008%	1
Biological Process: leaf development (GO:0048366);	16 out of 1011 1.58259149357072%	398 out of 23596 1.68672656382438%	1
Biological Process: aromatic amino acid family biosynthetic process (GO:0009073);	4 out of 1011 0.395647873392681%	102 out of 23596 0.432276657060519%	1
Biological Process: small molecule metabolic process (GO:0044281);	16 out of 1011 1.58259149357072%	399 out of 23596 1.69096457026615%	1
Biological Process: cellular nitrogen compound metabolic process (GO:0034641);	6 out of 1011 0.593471810089021%	153 out of 23596 0.648414985590778%	1
Biological Process: abscisic acid biosynthetic process (GO:0009688);	3 out of 1011 0.29673590504451%	77 out of 23596 0.326326496016274%	1
Biological Process: pigmentation (GO:0043473);	2 out of 1011 0.19782393669634%	51 out of 23596 0.216138328530259%	1
Biological Process: negative regulation of circadian rhythm (GO:0042754);	2 out of 1011 0.19782393669634%	51 out of 23596 0.216138328530259%	1
Biological Process: protein desumoylation (GO:0016926);	7 out of 1011 0.692383778437191%	179 out of 23596 0.758603153076793%	1
Biological Process: pollen germination (GO:0009846);	7 out of 1011 0.692383778437191%	179 out of 23596 0.758603153076793%	1
Biological Process: protein processing (GO:0016485);	1 out of 1011 0.0989119683481701%	24 out of 23596 0.101712154602475%	1
Biological Process: carbohydrate homeostasis (GO:0033500);	1 out of 1011 0.0989119683481701%	24 out of 23596 0.101712154602475%	1
Biological Process: pyruvate metabolic process (GO:0006090);	1 out of 1011 0.0989119683481701%	24 out of 23596 0.101712154602475%	1
Biological Process: positive regulation of intracellular protein kinase cascade (GO:0010740);	1 out of 1011 0.0989119683481701%	24 out of 23596 0.101712154602475%	1
Biological Process: xenobiotic catabolic process (GO:0042178);	1 out of 1011 0.0989119683481701%	24 out of 23596 0.101712154602475%	1
Biological Process: nitric oxide mediated signal transduction (GO:0007263);	1 out of 1011 0.0989119683481701%	24 out of 23596 0.101712154602475%	1
Biological Process: maintenance of DNA methylation (GO:0010216);	1 out of 1011 0.0989119683481701%	24 out of 23596 0.101712154602475%	1
Biological Process: Group II intron splicing (GO:0000373);	1 out of 1011 0.0989119683481701%	24 out of 23596 0.101712154602475%	1
Biological Process: xanthophyll biosynthetic process (GO:0016123);	1 out of 1011 0.0989119683481701%	24 out of 23596 0.101712154602475%	1
Biological Process: regulation of exocytosis (GO:0017157);	1 out of 1011 0.0989119683481701%	24 out of 23596 0.101712154602475%	1
Biological Process: cellular response to neutral pH (GO:0036244);	1 out of 1011 0.0989119683481701%	24 out of 23596 0.101712154602475%	1
Biological Process: endoplasmic reticulum unfolded protein response (GO:0030968);	19 out of 1011 1.87932739861523%	476 out of 23596 2.01729106628242%	1
Biological Process: Notch signaling pathway (GO:0007219);	2 out of 1011 0.19782393669634%	52 out of 23596 0.220376334972029%	1
Biological Process: plant-type hypersensitive response (GO:0009626);	7 out of 1011 0.692383778437191%	181 out of 23596 0.767079165960332%	1
Biological Process: histone phosphorylation (GO:0016572);	6 out of 1011 0.593471810089021%	156 out of 23596 0.661129004916088%	1
Biological Process: sulfur amino acid metabolic process (GO:0000096);	4 out of 1011 0.395647873392681%	105 out of 23596 0.444990676385828%	1
Biological Process: axon guidance (GO:0007411);	3 out of 1011 0.29673590504451%	79 out of 23596 0.334802508899814%	1
Biological Process: chlorophyll metabolic process (GO:0015994);	1 out of 1011 0.0989119683481701%	25 out of 23596 0.105950161044245%	1
Biological Process: protein acetylation (GO:0006473);	1 out of 1011 0.0989119683481701%	25 out of 23596 0.105950161044245%	1
Biological Process: ATP metabolic process (GO:0046034);	1 out of 1011 0.0989119683481701%	25 out of 23596 0.105950161044245%	1
Biological Process: response to singlet oxygen (GO:0000304);	1 out of 1011 0.0989119683481701%	25 out of 23596 0.105950161044245%	1
Biological Process: nucleobase-containing small molecule interconversion (GO:0015949);	1 out of 1011 0.0989119683481701%	25 out of 23596 0.105950161044245%	1
Biological Process: chromatin silencing (GO:0006342);	9 out of 1011 0.890207715133531%	232 out of 23596 0.983217494490592%	1
Biological Process: DNA-dependent transcription, initiation (GO:0006352);	2 out of 1011 0.19782393669634%	53 out of 23596 0.224614341413799%	1
Biological Process: floral organ abscission (GO:0010227);	2 out of 1011 0.19782393669634%	53 out of 23596 0.224614341413799%	1
Biological Process: regulation of cell growth (GO:0001558);	2 out of 1011 0.19782393669634%	53 out of 23596 0.224614341413799%	1
Biological Process: covalent chromatin modification (GO:0016569);	2 out of 1011 0.19782393669634%	53 out of 23596 0.224614341413799%	1
Biological Process: regulation of developmental process (GO:0050793);	2 out of 1011 0.19782393669634%	53 out of 23596 0.224614341413799%	1
Biological Process: reproductive structure development (GO:0048608);	14 out of 1011 1.38476755687438%	357 out of 23596 1.51296829971182%	1
Biological Process: seed maturation (GO:0010431);	5 out of 1011 0.494559841740851%	132 out of 23596 0.559416850313612%	1
Biological Process: hydrogen peroxide biosynthetic process (GO:0050665);	7 out of 1011 0.692383778437191%	184 out of 23596 0.779793185285642%	1
Biological Process: organ senescence (GO:0010260);	5 out of 1011 0.494559841740851%	133 out of 23596 0.563654856755382%	1
Biological Process: phosphatidylinositol phosphorylation (GO:0046854);	2 out of 1011 0.19782393669634%	54 out of 23596 0.228852347855569%	1
Biological Process: cellular macromolecule biosynthetic process (GO:0034645);	15 out of 1011 1.48367952522255%	384 out of 23596 1.6273944736396%	1
Biological Process: alkaloid metabolic process (GO:0009820);	1 out of 1011 0.0989119683481701%	26 out of 23596 0.110188167486015%	1
Biological Process: peptidyl-tyrosine dephosphorylation (GO:0035335);	1 out of 1011 0.0989119683481701%	26 out of 23596 0.110188167486015%	1
Biological Process: cell wall pectin biosynthetic process (GO:0052325);	1 out of 1011 0.0989119683481701%	26 out of 23596 0.110188167486015%	1
Biological Process: positive regulation of RNA metabolic process (GO:0051254);	1 out of 1011 0.0989119683481701%	26 out of 23596 0.110188167486015%	1
Biological Process: immune response-regulating signaling pathway (GO:0002764);	1 out of 1011 0.0989119683481701%	26 out of 23596 0.110188167486015%	1
Biological Process: osmosensory signaling pathway (GO:0007231);	1 out of 1011 0.0989119683481701%	26 out of 23596 0.110188167486015%	1
Biological Process: jasmonic acid and ethylene-dependent systemic resistance, ethylene mediated signaling pathway (GO:0009871);	1 out of 1011 0.0989119683481701%	26 out of 23596 0.110188167486015%	1
Biological Process: regulation of endocytosis (GO:0030100);	1 out of 1011 0.0989119683481701%	26 out of 23596 0.110188167486015%	1
Biological Process: protein refolding (GO:0042026);	1 out of 1011 0.0989119683481701%	26 out of 23596 0.110188167486015%	1
Biological Process: response to superoxide (GO:0000303);	3 out of 1011 0.29673590504451%	81 out of 23596 0.343278521783353%	1
Biological Process: oxylipin biosynthetic process (GO:0031408);	4 out of 1011 0.395647873392681%	108 out of 23596 0.457704695711137%	1
Biological Process: metabolic process (GO:0008152);	36 out of 1011 3.56083086053412%	898 out of 23596 3.80572978470927%	1
Biological Process: mRNA modification (GO:0016556);	8 out of 1011 0.791295746785361%	211 out of 23596 0.894219359213426%	1
Biological Process: regulation of apoptotic process (GO:0042981);	3 out of 1011 0.29673590504451%	82 out of 23596 0.347516528225123%	1
Biological Process: cellular response to growth factor stimulus (GO:0071363);	2 out of 1011 0.19782393669634%	55 out of 23596 0.233090354297339%	1
Biological Process: response to freezing (GO:0050826);	5 out of 1011 0.494559841740851%	135 out of 23596 0.572130869638922%	1
Biological Process: post-embryonic development (GO:0009791);	21 out of 1011 2.07715133531157%	535 out of 23596 2.26733344634684%	1
Biological Process: immune system process (GO:0002376);	6 out of 1011 0.593471810089021%	161 out of 23596 0.682319037124936%	1
Biological Process: histone H3-K9 demethylation (GO:0033169);	1 out of 1011 0.0989119683481701%	27 out of 23596 0.114426173927784%	1
Biological Process: protein import into nucleus, translocation (GO:0000060);	1 out of 1011 0.0989119683481701%	27 out of 23596 0.114426173927784%	1
Biological Process: regulation of DNA-dependent transcription in response to stress (GO:0043620);	1 out of 1011 0.0989119683481701%	27 out of 23596 0.114426173927784%	1
Biological Process: protein import into chloroplast stroma (GO:0045037);	1 out of 1011 0.0989119683481701%	27 out of 23596 0.114426173927784%	1
Biological Process: regulation of RNA splicing (GO:0043484);	1 out of 1011 0.0989119683481701%	27 out of 23596 0.114426173927784%	1
Biological Process: guard cell differentiation (GO:0010052);	1 out of 1011 0.0989119683481701%	27 out of 23596 0.114426173927784%	1
Biological Process: phosphatidylinositol-3-phosphate biosynthetic process (GO:0036092);	1 out of 1011 0.0989119683481701%	27 out of 23596 0.114426173927784%	1
Biological Process: response to cytokine stimulus (GO:0034097);	1 out of 1011 0.0989119683481701%	27 out of 23596 0.114426173927784%	1
Biological Process: detection of brassinosteroid stimulus (GO:0009729);	1 out of 1011 0.0989119683481701%	27 out of 23596 0.114426173927784%	1
Biological Process: floral organ morphogenesis (GO:0048444);	1 out of 1011 0.0989119683481701%	27 out of 23596 0.114426173927784%	1
Biological Process: inositol trisphosphate metabolic process (GO:0032957);	1 out of 1011 0.0989119683481701%	27 out of 23596 0.114426173927784%	1
Biological Process: visual perception (GO:0007601);	1 out of 1011 0.0989119683481701%	27 out of 23596 0.114426173927784%	1
Biological Process: cell wall modification (GO:0042545);	9 out of 1011 0.890207715133531%	238 out of 23596 1.00864553314121%	1
Biological Process: cellular response to starvation (GO:0009267);	3 out of 1011 0.29673590504451%	83 out of 23596 0.351754534666893%	1
Biological Process: sepal formation (GO:0048453);	3 out of 1011 0.29673590504451%	83 out of 23596 0.351754534666893%	1
Biological Process: peroxisome localization (GO:0060151);	2 out of 1011 0.19782393669634%	56 out of 23596 0.237328360739108%	1
Biological Process: Golgi localization (GO:0051645);	2 out of 1011 0.19782393669634%	56 out of 23596 0.237328360739108%	1
Biological Process: mucilage metabolic process involved seed coat development (GO:0048359);	2 out of 1011 0.19782393669634%	56 out of 23596 0.237328360739108%	1
Biological Process: phosphatidylinositol-mediated signaling (GO:0048015);	2 out of 1011 0.19782393669634%	56 out of 23596 0.237328360739108%	1
Biological Process: cellular macromolecule metabolic process (GO:0044260);	23 out of 1011 2.27497527200791%	587 out of 23596 2.48770978131887%	1
Biological Process: fatty acid beta-oxidation (GO:0006635);	13 out of 1011 1.28585558852621%	340 out of 23596 1.44092219020173%	1
Biological Process: negative regulation of sequence-specific DNA binding transcription factor activity (GO:0043433);	1 out of 1011 0.0989119683481701%	28 out of 23596 0.118664180369554%	1
Biological Process: filamentous growth (GO:0030447);	1 out of 1011 0.0989119683481701%	28 out of 23596 0.118664180369554%	1
Biological Process: anion homeostasis (GO:0055081);	1 out of 1011 0.0989119683481701%	28 out of 23596 0.118664180369554%	1
Biological Process: stomatal closure (GO:0090332);	1 out of 1011 0.0989119683481701%	28 out of 23596 0.118664180369554%	1
Biological Process: regulation of inflammatory response (GO:0050727);	1 out of 1011 0.0989119683481701%	28 out of 23596 0.118664180369554%	1
Biological Process: mucilage extrusion from seed coat (GO:0080001);	2 out of 1011 0.19782393669634%	57 out of 23596 0.241566367180878%	1
Biological Process: specification of floral organ number (GO:0048833);	2 out of 1011 0.19782393669634%	57 out of 23596 0.241566367180878%	1
Biological Process: lead ion transport (GO:0015692);	3 out of 1011 0.29673590504451%	85 out of 23596 0.360230547550432%	1
Biological Process: petal formation (GO:0048451);	3 out of 1011 0.29673590504451%	85 out of 23596 0.360230547550432%	1
Biological Process: aromatic compound biosynthetic process (GO:0019438);	4 out of 1011 0.395647873392681%	112 out of 23596 0.474656721478217%	1
Biological Process: response to molecule of bacterial origin (GO:0002237);	9 out of 1011 0.890207715133531%	242 out of 23596 1.02559755890829%	1
Biological Process: gibberellin biosynthetic process (GO:0009686);	6 out of 1011 0.593471810089021%	165 out of 23596 0.699271062892016%	1
Biological Process: mitochondrion localization (GO:0051646);	2 out of 1011 0.19782393669634%	58 out of 23596 0.245804373622648%	1
Biological Process: alternative nuclear mRNA splicing, via spliceosome (GO:0000380);	2 out of 1011 0.19782393669634%	58 out of 23596 0.245804373622648%	1
Biological Process: triglyceride biosynthetic process (GO:0019432);	2 out of 1011 0.19782393669634%	58 out of 23596 0.245804373622648%	1
Biological Process: regulation of salicylic acid mediated signaling pathway (GO:2000031);	2 out of 1011 0.19782393669634%	58 out of 23596 0.245804373622648%	1
Biological Process: regulation of defense response to bacterium (GO:1900424);	1 out of 1011 0.0989119683481701%	29 out of 23596 0.122902186811324%	1
Biological Process: multicellular organismal aging (GO:0010259);	1 out of 1011 0.0989119683481701%	29 out of 23596 0.122902186811324%	1
Biological Process: circadian regulation of gene expression (GO:0032922);	1 out of 1011 0.0989119683481701%	29 out of 23596 0.122902186811324%	1
Biological Process: response to testosterone stimulus (GO:0033574);	1 out of 1011 0.0989119683481701%	29 out of 23596 0.122902186811324%	1
Biological Process: farnesyl diphosphate catabolic process (GO:0045339);	1 out of 1011 0.0989119683481701%	29 out of 23596 0.122902186811324%	1
Biological Process: feminization of hermaphroditic germ-line (GO:0040022);	1 out of 1011 0.0989119683481701%	29 out of 23596 0.122902186811324%	1
Biological Process: sphingolipid metabolic process (GO:0006665);	1 out of 1011 0.0989119683481701%	29 out of 23596 0.122902186811324%	1
Biological Process: regulation of cell proliferation (GO:0042127);	9 out of 1011 0.890207715133531%	244 out of 23596 1.03407357179183%	1
Biological Process: regulation of cell adhesion (GO:0030155);	2 out of 1011 0.19782393669634%	59 out of 23596 0.250042380064418%	1
Biological Process: positive regulation of translation (GO:0045727);	3 out of 1011 0.29673590504451%	87 out of 23596 0.368706560433972%	1
Biological Process: Golgi vesicle transport (GO:0048193);	15 out of 1011 1.48367952522255%	398 out of 23596 1.68672656382438%	1
Biological Process: organ morphogenesis (GO:0009887);	14 out of 1011 1.38476755687438%	373 out of 23596 1.58077640278013%	1
Biological Process: mycelium development (GO:0043581);	1 out of 1011 0.0989119683481701%	30 out of 23596 0.127140193253094%	1
Biological Process: fungal-type cell wall organization (GO:0031505);	1 out of 1011 0.0989119683481701%	30 out of 23596 0.127140193253094%	1
Biological Process: regulation of epidermal cell differentiation (GO:0045604);	1 out of 1011 0.0989119683481701%	30 out of 23596 0.127140193253094%	1
Biological Process: response to 1-aminocyclopropane-1-carboxylic acid (GO:0009961);	1 out of 1011 0.0989119683481701%	30 out of 23596 0.127140193253094%	1
Biological Process: aging (GO:0007568);	5 out of 1011 0.494559841740851%	142 out of 23596 0.60179691473131%	1
Biological Process: lipid storage (GO:0019915);	6 out of 1011 0.593471810089021%	169 out of 23596 0.716223088659095%	1
Biological Process: regulation of post-embryonic development (GO:0048580);	3 out of 1011 0.29673590504451%	89 out of 23596 0.377182573317511%	1
Biological Process: trichome branching (GO:0010091);	3 out of 1011 0.29673590504451%	89 out of 23596 0.377182573317511%	1
Biological Process: negative regulation of seed germination (GO:0010187);	3 out of 1011 0.29673590504451%	89 out of 23596 0.377182573317511%	1
Biological Process: retrograde transport, endosome to Golgi (GO:0042147);	1 out of 1011 0.0989119683481701%	31 out of 23596 0.131378199694864%	1
Biological Process: positive regulation of sequence-specific DNA binding transcription factor activity (GO:0051091);	1 out of 1011 0.0989119683481701%	31 out of 23596 0.131378199694864%	1
Biological Process: regulation of developmental growth (GO:0048638);	1 out of 1011 0.0989119683481701%	31 out of 23596 0.131378199694864%	1
Biological Process: regulation of nitrogen compound metabolic process (GO:0051171);	1 out of 1011 0.0989119683481701%	31 out of 23596 0.131378199694864%	1
Biological Process: floral meristem determinacy (GO:0010582);	1 out of 1011 0.0989119683481701%	31 out of 23596 0.131378199694864%	1
Biological Process: seed germination (GO:0009845);	17 out of 1011 1.68150346191889%	452 out of 23596 1.91557891167995%	1
Biological Process: RNA splicing (GO:0008380);	6 out of 1011 0.593471810089021%	171 out of 23596 0.724699101542634%	1
Biological Process: regionalization (GO:0003002);	5 out of 1011 0.494559841740851%	145 out of 23596 0.61451093405662%	1
Biological Process: hemopoiesis (GO:0030097);	2 out of 1011 0.19782393669634%	62 out of 23596 0.262756399389727%	1
Biological Process: multicellular organismal development (GO:0007275);	18 out of 1011 1.78041543026706%	480 out of 23596 2.0342430920495%	1
Biological Process: cellular response to indolebutyric acid stimulus (GO:0071366);	3 out of 1011 0.29673590504451%	91 out of 23596 0.385658586201051%	1
Biological Process: inositol phosphate dephosphorylation (GO:0046855);	1 out of 1011 0.0989119683481701%	32 out of 23596 0.135616206136633%	1
Biological Process: platelet activation (GO:0030168);	1 out of 1011 0.0989119683481701%	32 out of 23596 0.135616206136633%	1
Biological Process: phyllome development (GO:0048827);	5 out of 1011 0.494559841740851%	146 out of 23596 0.61874894049839%	1
Biological Process: production of ta-siRNAs involved in RNA interference (GO:0010267);	8 out of 1011 0.791295746785361%	226 out of 23596 0.957789455839973%	1
Biological Process: post-Golgi vesicle-mediated transport (GO:0006892);	2 out of 1011 0.19782393669634%	63 out of 23596 0.266994405831497%	1
Biological Process: brassinosteroid metabolic process (GO:0016131);	2 out of 1011 0.19782393669634%	63 out of 23596 0.266994405831497%	1
Biological Process: body morphogenesis (GO:0010171);	2 out of 1011 0.19782393669634%	63 out of 23596 0.266994405831497%	1
Biological Process: chromosome organization (GO:0051276);	5 out of 1011 0.494559841740851%	147 out of 23596 0.622986946940159%	1
Biological Process: endosperm development (GO:0009960);	3 out of 1011 0.29673590504451%	92 out of 23596 0.389896592642821%	1
Biological Process: polysaccharide metabolic process (GO:0005976);	6 out of 1011 0.593471810089021%	174 out of 23596 0.737413120867944%	1
Biological Process: lipid catabolic process (GO:0016042);	1 out of 1011 0.0989119683481701%	33 out of 23596 0.139854212578403%	1
Biological Process: post-embryonic organ development (GO:0048569);	1 out of 1011 0.0989119683481701%	33 out of 23596 0.139854212578403%	1
Biological Process: cardiovascular system development (GO:0072358);	1 out of 1011 0.0989119683481701%	33 out of 23596 0.139854212578403%	1
Biological Process: protein complex subunit organization (GO:0071822);	1 out of 1011 0.0989119683481701%	33 out of 23596 0.139854212578403%	1
Biological Process: regulation of seedling development (GO:1900140);	1 out of 1011 0.0989119683481701%	33 out of 23596 0.139854212578403%	1
Biological Process: heme biosynthetic process (GO:0006783);	1 out of 1011 0.0989119683481701%	33 out of 23596 0.139854212578403%	1
Biological Process: maintenance of floral meristem identity (GO:0010076);	1 out of 1011 0.0989119683481701%	33 out of 23596 0.139854212578403%	1
Biological Process: sensory perception of sound (GO:0007605);	1 out of 1011 0.0989119683481701%	33 out of 23596 0.139854212578403%	1
Biological Process: glycerol ether metabolic process (GO:0006662);	1 out of 1011 0.0989119683481701%	33 out of 23596 0.139854212578403%	1
Biological Process: regulation of jasmonic acid mediated signaling pathway (GO:2000022);	1 out of 1011 0.0989119683481701%	33 out of 23596 0.139854212578403%	1
Biological Process: photorespiration (GO:0009853);	9 out of 1011 0.890207715133531%	254 out of 23596 1.07645363620953%	1
Biological Process: nervous system development (GO:0007399);	6 out of 1011 0.593471810089021%	175 out of 23596 0.741651127309713%	1
Biological Process: positive regulation of gene expression (GO:0010628);	2 out of 1011 0.19782393669634%	64 out of 23596 0.271232412273267%	1
Biological Process: D-xylose metabolic process (GO:0042732);	2 out of 1011 0.19782393669634%	64 out of 23596 0.271232412273267%	1
Biological Process: protein targeting to chloroplast (GO:0045036);	2 out of 1011 0.19782393669634%	64 out of 23596 0.271232412273267%	1
Biological Process: macromolecule biosynthetic process (GO:0009059);	4 out of 1011 0.395647873392681%	121 out of 23596 0.512798779454145%	1
Biological Process: cell adhesion (GO:0007155);	9 out of 1011 0.890207715133531%	255 out of 23596 1.0806916426513%	1
Biological Process: ER to Golgi vesicle-mediated transport (GO:0006888);	14 out of 1011 1.38476755687438%	385 out of 23596 1.63163248008137%	1
Biological Process: cortical microtubule organization (GO:0043622);	2 out of 1011 0.19782393669634%	65 out of 23596 0.275470418715036%	1
Biological Process: amino acid transport (GO:0006865);	13 out of 1011 1.28585558852621%	360 out of 23596 1.52568231903712%	1
Biological Process: TRIF-dependent toll-like receptor signaling pathway (GO:0035666);	1 out of 1011 0.0989119683481701%	34 out of 23596 0.144092219020173%	1
Biological Process: respiratory electron transport chain (GO:0022904);	1 out of 1011 0.0989119683481701%	34 out of 23596 0.144092219020173%	1
Biological Process: floral organ development (GO:0048437);	4 out of 1011 0.395647873392681%	123 out of 23596 0.521274792337684%	1
Biological Process: regulation of nucleobase-containing compound metabolic process (GO:0019219);	2 out of 1011 0.19782393669634%	66 out of 23596 0.279708425156806%	1
Biological Process: cellular response to abscisic acid stimulus (GO:0071215);	2 out of 1011 0.19782393669634%	66 out of 23596 0.279708425156806%	1
Biological Process: vesicle docking involved in exocytosis (GO:0006904);	1 out of 1011 0.0989119683481701%	35 out of 23596 0.148330225461943%	1
Biological Process: negative regulation of cell death (GO:0060548);	1 out of 1011 0.0989119683481701%	35 out of 23596 0.148330225461943%	1
Biological Process: aromatic compound catabolic process (GO:0019439);	1 out of 1011 0.0989119683481701%	35 out of 23596 0.148330225461943%	1
Biological Process: actin filament-based process (GO:0030029);	1 out of 1011 0.0989119683481701%	35 out of 23596 0.148330225461943%	1
Biological Process: potassium ion import (GO:0010107);	1 out of 1011 0.0989119683481701%	35 out of 23596 0.148330225461943%	1
Biological Process: ceramide metabolic process (GO:0006672);	1 out of 1011 0.0989119683481701%	35 out of 23596 0.148330225461943%	1
Biological Process: neuron differentiation (GO:0030182);	1 out of 1011 0.0989119683481701%	35 out of 23596 0.148330225461943%	1
Biological Process: trichome differentiation (GO:0010026);	1 out of 1011 0.0989119683481701%	35 out of 23596 0.148330225461943%	1
Biological Process: cellular process (GO:0009987);	26 out of 1011 2.57171117705242%	694 out of 23596 2.94117647058824%	1
Biological Process: morphogenesis of an epithelium (GO:0002009);	2 out of 1011 0.19782393669634%	67 out of 23596 0.283946431598576%	1
Biological Process: antigen processing and presentation of exogenous peptide antigen via MHC class II (GO:0019886);	2 out of 1011 0.19782393669634%	67 out of 23596 0.283946431598576%	1
Biological Process: phosphatidylglycerol biosynthetic process (GO:0006655);	5 out of 1011 0.494559841740851%	153 out of 23596 0.648414985590778%	1
Biological Process: skeletal system development (GO:0001501);	1 out of 1011 0.0989119683481701%	36 out of 23596 0.152568231903712%	1
Biological Process: toll-like receptor 3 signaling pathway (GO:0034138);	1 out of 1011 0.0989119683481701%	36 out of 23596 0.152568231903712%	1
Biological Process: cellular response to salt stress (GO:0071472);	1 out of 1011 0.0989119683481701%	36 out of 23596 0.152568231903712%	1
Biological Process: detection of stimulus (GO:0051606);	1 out of 1011 0.0989119683481701%	36 out of 23596 0.152568231903712%	1
Biological Process: positive regulation of cellular biosynthetic process (GO:0031328);	1 out of 1011 0.0989119683481701%	36 out of 23596 0.152568231903712%	1
Biological Process: chromosome segregation (GO:0007059);	5 out of 1011 0.494559841740851%	154 out of 23596 0.652652992032548%	1
Biological Process: protein catabolic process (GO:0030163);	2 out of 1011 0.19782393669634%	68 out of 23596 0.288184438040346%	1
Biological Process: aromatic amino acid family metabolic process (GO:0009072);	3 out of 1011 0.29673590504451%	98 out of 23596 0.41532463129344%	1
Biological Process: pigment biosynthetic process (GO:0046148);	3 out of 1011 0.29673590504451%	98 out of 23596 0.41532463129344%	1
Biological Process: protein modification by small protein conjugation or removal (GO:0070647);	1 out of 1011 0.0989119683481701%	37 out of 23596 0.156806238345482%	1
Biological Process: phosphate ion homeostasis (GO:0055062);	1 out of 1011 0.0989119683481701%	37 out of 23596 0.156806238345482%	1
Biological Process: cell proliferation (GO:0008283);	14 out of 1011 1.38476755687438%	396 out of 23596 1.67825055094084%	1
Biological Process: mRNA processing (GO:0006397);	6 out of 1011 0.593471810089021%	184 out of 23596 0.779793185285642%	1
Biological Process: negative regulation of flower development (GO:0009910);	5 out of 1011 0.494559841740851%	157 out of 23596 0.665367011357857%	1
Biological Process: positive regulation of apoptotic process (GO:0043065);	3 out of 1011 0.29673590504451%	100 out of 23596 0.423800644176979%	1
Biological Process: cell surface receptor signaling pathway (GO:0007166);	3 out of 1011 0.29673590504451%	100 out of 23596 0.423800644176979%	1
Biological Process: histone H4 acetylation (GO:0043967);	2 out of 1011 0.19782393669634%	70 out of 23596 0.296660450923885%	1
Biological Process: meiotic DNA double-strand break formation (GO:0042138);	6 out of 1011 0.593471810089021%	185 out of 23596 0.784031191727411%	1
Biological Process: camalexin biosynthetic process (GO:0010120);	1 out of 1011 0.0989119683481701%	38 out of 23596 0.161044244787252%	1
Biological Process: 2-oxoglutarate metabolic process (GO:0006103);	1 out of 1011 0.0989119683481701%	38 out of 23596 0.161044244787252%	1
Biological Process: tapetal cell fate specification (GO:0010234);	1 out of 1011 0.0989119683481701%	38 out of 23596 0.161044244787252%	1
Biological Process: glyoxylate cycle (GO:0006097);	1 out of 1011 0.0989119683481701%	38 out of 23596 0.161044244787252%	1
Biological Process: positive regulation of cell cycle (GO:0045787);	1 out of 1011 0.0989119683481701%	38 out of 23596 0.161044244787252%	1
Biological Process: protein stabilization (GO:0050821);	2 out of 1011 0.19782393669634%	71 out of 23596 0.300898457365655%	1
Biological Process: production of siRNA involved in RNA interference (GO:0030422);	2 out of 1011 0.19782393669634%	71 out of 23596 0.300898457365655%	1
Biological Process: regulation of phenylpropanoid metabolic process (GO:2000762);	2 out of 1011 0.19782393669634%	71 out of 23596 0.300898457365655%	1
Biological Process: floral whorl development (GO:0048438);	4 out of 1011 0.395647873392681%	131 out of 23596 0.555178843871843%	1
Biological Process: regulation of catalytic activity (GO:0050790);	3 out of 1011 0.29673590504451%	102 out of 23596 0.432276657060519%	1
Biological Process: neuron development (GO:0048666);	1 out of 1011 0.0989119683481701%	39 out of 23596 0.165282251229022%	1
Biological Process: root hair cell tip growth (GO:0048768);	1 out of 1011 0.0989119683481701%	39 out of 23596 0.165282251229022%	1
Biological Process: negative regulation of gene expression (GO:0010629);	1 out of 1011 0.0989119683481701%	39 out of 23596 0.165282251229022%	1
Biological Process: regulation of defense response to fungus (GO:1900150);	1 out of 1011 0.0989119683481701%	39 out of 23596 0.165282251229022%	1
Biological Process: protein K11-linked ubiquitination (GO:0070979);	1 out of 1011 0.0989119683481701%	39 out of 23596 0.165282251229022%	1
Biological Process: glucuronoxylan biosynthetic process (GO:0010417);	1 out of 1011 0.0989119683481701%	39 out of 23596 0.165282251229022%	1
Biological Process: response to cAMP (GO:0051591);	1 out of 1011 0.0989119683481701%	39 out of 23596 0.165282251229022%	1
Biological Process: protein peptidyl-prolyl isomerization (GO:0000413);	2 out of 1011 0.19782393669634%	72 out of 23596 0.305136463807425%	1
Biological Process: cellular component biogenesis (GO:0044085);	2 out of 1011 0.19782393669634%	72 out of 23596 0.305136463807425%	1
Biological Process: negative regulation of transcription from RNA polymerase II promoter (GO:0000122);	6 out of 1011 0.593471810089021%	188 out of 23596 0.796745211052721%	1
Biological Process: para-aminobenzoic acid metabolic process (GO:0046482);	4 out of 1011 0.395647873392681%	132 out of 23596 0.559416850313612%	1
Biological Process: protein complex assembly (GO:0006461);	2 out of 1011 0.19782393669634%	73 out of 23596 0.309374470249195%	1
Biological Process: cellular component movement (GO:0006928);	2 out of 1011 0.19782393669634%	73 out of 23596 0.309374470249195%	1
Biological Process: methionine biosynthetic process (GO:0009086);	7 out of 1011 0.692383778437191%	217 out of 23596 0.919647397864045%	1
Biological Process: toll-like receptor 4 signaling pathway (GO:0034142);	1 out of 1011 0.0989119683481701%	40 out of 23596 0.169520257670792%	1
Biological Process: establishment of cell polarity (GO:0030010);	1 out of 1011 0.0989119683481701%	40 out of 23596 0.169520257670792%	1
Biological Process: RNA interference (GO:0016246);	3 out of 1011 0.29673590504451%	104 out of 23596 0.440752669944058%	1
Biological Process: hermaphrodite genitalia development (GO:0040035);	4 out of 1011 0.395647873392681%	134 out of 23596 0.567892863197152%	1
Biological Process: ion transmembrane transport (GO:0034220);	2 out of 1011 0.19782393669634%	74 out of 23596 0.313612476690965%	1
Biological Process: regulation of cell cycle (GO:0051726);	6 out of 1011 0.593471810089021%	191 out of 23596 0.80945923037803%	1
Biological Process: sodium ion transport (GO:0006814);	1 out of 1011 0.0989119683481701%	41 out of 23596 0.173758264112561%	1
Biological Process: inflammatory response (GO:0006954);	1 out of 1011 0.0989119683481701%	41 out of 23596 0.173758264112561%	1
Biological Process: protein K63-linked ubiquitination (GO:0070534);	1 out of 1011 0.0989119683481701%	41 out of 23596 0.173758264112561%	1
Biological Process: developmental process (GO:0032502);	4 out of 1011 0.395647873392681%	136 out of 23596 0.576368876080692%	1
Biological Process: negative regulation of ethylene mediated signaling pathway (GO:0010105);	1 out of 1011 0.0989119683481701%	42 out of 23596 0.177996270554331%	1
Biological Process: ATP synthesis coupled proton transport (GO:0015986);	1 out of 1011 0.0989119683481701%	42 out of 23596 0.177996270554331%	1
Biological Process: maintenance of inflorescence meristem identity (GO:0010077);	1 out of 1011 0.0989119683481701%	42 out of 23596 0.177996270554331%	1
Biological Process: regulation of circadian rhythm (GO:0042752);	3 out of 1011 0.29673590504451%	107 out of 23596 0.453466689269368%	1
Biological Process: multicellular organism reproduction (GO:0032504);	2 out of 1011 0.19782393669634%	76 out of 23596 0.322088489574504%	1
Biological Process: methylation-dependent chromatin silencing (GO:0006346);	7 out of 1011 0.692383778437191%	222 out of 23596 0.940837430072894%	1
Biological Process: small GTPase mediated signal transduction (GO:0007264);	4 out of 1011 0.395647873392681%	137 out of 23596 0.580606882522461%	1
Biological Process: meiotic chromosome segregation (GO:0045132);	7 out of 1011 0.692383778437191%	223 out of 23596 0.945075436514664%	1
Biological Process: protein metabolic process (GO:0019538);	3 out of 1011 0.29673590504451%	108 out of 23596 0.457704695711137%	1
Biological Process: cellular amino acid biosynthetic process (GO:0008652);	4 out of 1011 0.395647873392681%	138 out of 23596 0.584844888964231%	1
Biological Process: DNA-dependent transcription, elongation (GO:0006354);	2 out of 1011 0.19782393669634%	77 out of 23596 0.326326496016274%	1
Biological Process: activation of signaling protein activity involved in unfolded protein response (GO:0006987);	1 out of 1011 0.0989119683481701%	43 out of 23596 0.182234276996101%	1
Biological Process: longitudinal axis specification (GO:0009942);	1 out of 1011 0.0989119683481701%	43 out of 23596 0.182234276996101%	1
Biological Process: regulation of primary metabolic process (GO:0080090);	9 out of 1011 0.890207715133531%	279 out of 23596 1.18240379725377%	1
Biological Process: cellulose metabolic process (GO:0030243);	3 out of 1011 0.29673590504451%	109 out of 23596 0.461942702152907%	1
Biological Process: indole glucosinolate catabolic process (GO:0042344);	3 out of 1011 0.29673590504451%	109 out of 23596 0.461942702152907%	1
Biological Process: phosphorylation (GO:0016310);	23 out of 1011 2.27497527200791%	649 out of 23596 2.75046618070859%	1
Biological Process: cellular response to chemical stimulus (GO:0070887);	1 out of 1011 0.0989119683481701%	44 out of 23596 0.186472283437871%	1
Biological Process: phosphate ion transport (GO:0006817);	1 out of 1011 0.0989119683481701%	44 out of 23596 0.186472283437871%	1
Biological Process: cilium assembly (GO:0042384);	1 out of 1011 0.0989119683481701%	44 out of 23596 0.186472283437871%	1
Biological Process: Wnt receptor signaling pathway (GO:0016055);	1 out of 1011 0.0989119683481701%	44 out of 23596 0.186472283437871%	1
Biological Process: protein targeting to plasma membrane (GO:0072661);	1 out of 1011 0.0989119683481701%	44 out of 23596 0.186472283437871%	1
Biological Process: protein K48-linked ubiquitination (GO:0070936);	1 out of 1011 0.0989119683481701%	44 out of 23596 0.186472283437871%	1
Biological Process: tRNA modification (GO:0006400);	1 out of 1011 0.0989119683481701%	44 out of 23596 0.186472283437871%	1
Biological Process: cellular response to hormone stimulus (GO:0032870);	1 out of 1011 0.0989119683481701%	44 out of 23596 0.186472283437871%	1
Biological Process: lipid oxidation (GO:0034440);	1 out of 1011 0.0989119683481701%	44 out of 23596 0.186472283437871%	1
Biological Process: synaptic transmission (GO:0007268);	1 out of 1011 0.0989119683481701%	44 out of 23596 0.186472283437871%	1
Biological Process: protein targeting to vacuole (GO:0006623);	9 out of 1011 0.890207715133531%	282 out of 23596 1.19511781657908%	1
Biological Process: heart development (GO:0007507);	2 out of 1011 0.19782393669634%	79 out of 23596 0.334802508899814%	1
Biological Process: aerobic respiration (GO:0009060);	2 out of 1011 0.19782393669634%	79 out of 23596 0.334802508899814%	1
Biological Process: germ cell development (GO:0007281);	2 out of 1011 0.19782393669634%	79 out of 23596 0.334802508899814%	1
Biological Process: intra-Golgi vesicle-mediated transport (GO:0006891);	5 out of 1011 0.494559841740851%	170 out of 23596 0.720461095100865%	1
Biological Process: histone H3-K9 methylation (GO:0051567);	11 out of 1011 1.08803165182987%	337 out of 23596 1.42820817087642%	1
Biological Process: cellular amino acid metabolic process (GO:0006520);	3 out of 1011 0.29673590504451%	111 out of 23596 0.470418715036447%	1
Biological Process: telomere maintenance in response to DNA damage (GO:0043247);	3 out of 1011 0.29673590504451%	111 out of 23596 0.470418715036447%	1
Biological Process: stomatal movement (GO:0010118);	3 out of 1011 0.29673590504451%	111 out of 23596 0.470418715036447%	1
Biological Process: tRNA metabolic process (GO:0006399);	1 out of 1011 0.0989119683481701%	45 out of 23596 0.190710289879641%	1
Biological Process: stem cell maintenance (GO:0019827);	1 out of 1011 0.0989119683481701%	45 out of 23596 0.190710289879641%	1
Biological Process: auxin biosynthetic process (GO:0009851);	1 out of 1011 0.0989119683481701%	45 out of 23596 0.190710289879641%	1
Biological Process: negative regulation of signal transduction (GO:0009968);	1 out of 1011 0.0989119683481701%	45 out of 23596 0.190710289879641%	1
Biological Process: embryonic morphogenesis (GO:0048598);	1 out of 1011 0.0989119683481701%	45 out of 23596 0.190710289879641%	1
Biological Process: regulation of unidimensional cell growth (GO:0051510);	7 out of 1011 0.692383778437191%	229 out of 23596 0.970503475165282%	1
Biological Process: procambium histogenesis (GO:0010067);	1 out of 1011 0.0989119683481701%	46 out of 23596 0.19494829632141%	1
Biological Process: root epidermal cell differentiation (GO:0010053);	1 out of 1011 0.0989119683481701%	46 out of 23596 0.19494829632141%	1
Biological Process: regulation of reactive oxygen species metabolic process (GO:2000377);	1 out of 1011 0.0989119683481701%	46 out of 23596 0.19494829632141%	1
Biological Process: regulation of cellular component organization (GO:0051128);	2 out of 1011 0.19782393669634%	81 out of 23596 0.343278521783353%	1
Biological Process: proteasome assembly (GO:0043248);	3 out of 1011 0.29673590504451%	113 out of 23596 0.478894727919986%	1
Biological Process: intracellular signal transduction (GO:0035556);	10 out of 1011 0.989119683481701%	314 out of 23596 1.33073402271571%	1
Biological Process: regulation of floral meristem growth (GO:0010080);	1 out of 1011 0.0989119683481701%	47 out of 23596 0.19918630276318%	1
Biological Process: etioplast organization (GO:0009662);	1 out of 1011 0.0989119683481701%	47 out of 23596 0.19918630276318%	1
Biological Process: cellular response to sulfur starvation (GO:0010438);	1 out of 1011 0.0989119683481701%	47 out of 23596 0.19918630276318%	1
Biological Process: chromatin silencing by small RNA (GO:0031048);	6 out of 1011 0.593471810089021%	204 out of 23596 0.864553314121037%	1
Biological Process: petal development (GO:0048441);	3 out of 1011 0.29673590504451%	115 out of 23596 0.487370740803526%	1
Biological Process: histone acetylation (GO:0016573);	2 out of 1011 0.19782393669634%	83 out of 23596 0.351754534666893%	1
Biological Process: red or far-red light signaling pathway (GO:0010017);	2 out of 1011 0.19782393669634%	83 out of 23596 0.351754534666893%	1
Biological Process: organophosphate metabolic process (GO:0019637);	1 out of 1011 0.0989119683481701%	48 out of 23596 0.20342430920495%	1
Biological Process: nucleolus organization (GO:0007000);	1 out of 1011 0.0989119683481701%	48 out of 23596 0.20342430920495%	1
Biological Process: calcium ion transmembrane transport (GO:0070588);	1 out of 1011 0.0989119683481701%	48 out of 23596 0.20342430920495%	1
Biological Process: transcription elongation from RNA polymerase II promoter (GO:0006368);	1 out of 1011 0.0989119683481701%	48 out of 23596 0.20342430920495%	1
Biological Process: regulation of telomere maintenance (GO:0032204);	3 out of 1011 0.29673590504451%	116 out of 23596 0.491608747245296%	1
Biological Process: vacuole organization (GO:0007033);	4 out of 1011 0.395647873392681%	147 out of 23596 0.622986946940159%	1
Biological Process: shoot development (GO:0048367);	6 out of 1011 0.593471810089021%	206 out of 23596 0.873029327004577%	1
Biological Process: proteasome core complex assembly (GO:0080129);	8 out of 1011 0.791295746785361%	263 out of 23596 1.11459569418546%	1
Biological Process: regulation of innate immune response (GO:0045088);	2 out of 1011 0.19782393669634%	84 out of 23596 0.355992541108662%	1
Biological Process: phosphate-containing compound metabolic process (GO:0006796);	5 out of 1011 0.494559841740851%	178 out of 23596 0.754365146635023%	1
Biological Process: one-carbon metabolic process (GO:0006730);	1 out of 1011 0.0989119683481701%	49 out of 23596 0.20766231564672%	1
Biological Process: gynoecium development (GO:0048467);	1 out of 1011 0.0989119683481701%	49 out of 23596 0.20766231564672%	1
Biological Process: response to iron ion (GO:0010039);	1 out of 1011 0.0989119683481701%	50 out of 23596 0.21190032208849%	1
Biological Process: cell morphogenesis (GO:0000902);	6 out of 1011 0.593471810089021%	210 out of 23596 0.889981352771656%	1
Biological Process: protein import into peroxisome matrix (GO:0016558);	6 out of 1011 0.593471810089021%	210 out of 23596 0.889981352771656%	1
Biological Process: embryo sac egg cell differentiation (GO:0009560);	6 out of 1011 0.593471810089021%	211 out of 23596 0.894219359213426%	1
Biological Process: proteasomal ubiquitin-dependent protein catabolic process (GO:0043161);	9 out of 1011 0.890207715133531%	297 out of 23596 1.25868791320563%	1
Biological Process: transcription from RNA polymerase II promoter (GO:0006366);	4 out of 1011 0.395647873392681%	152 out of 23596 0.644176979149008%	1
Biological Process: systemic acquired resistance (GO:0009627);	23 out of 1011 2.27497527200791%	676 out of 23596 2.86489235463638%	1
Biological Process: defense response to oomycetes (GO:0002229);	1 out of 1011 0.0989119683481701%	52 out of 23596 0.220376334972029%	1
Biological Process: long-chain fatty acid metabolic process (GO:0001676);	1 out of 1011 0.0989119683481701%	52 out of 23596 0.220376334972029%	1
Biological Process: somatic cell DNA recombination (GO:0016444);	1 out of 1011 0.0989119683481701%	52 out of 23596 0.220376334972029%	1
Biological Process: positive regulation of I-kappaB kinase/NF-kappaB cascade (GO:0043123);	1 out of 1011 0.0989119683481701%	52 out of 23596 0.220376334972029%	1
Biological Process: negative regulation of MAP kinase activity (GO:0043407);	3 out of 1011 0.29673590504451%	122 out of 23596 0.517036785895915%	1
Biological Process: defense response to virus (GO:0051607);	3 out of 1011 0.29673590504451%	123 out of 23596 0.521274792337684%	1
Biological Process: histone H3 acetylation (GO:0043966);	1 out of 1011 0.0989119683481701%	53 out of 23596 0.224614341413799%	1
Biological Process: regulation of transport (GO:0051049);	1 out of 1011 0.0989119683481701%	53 out of 23596 0.224614341413799%	1
Biological Process: production of miRNAs involved in gene silencing by miRNA (GO:0035196);	8 out of 1011 0.791295746785361%	273 out of 23596 1.15697575860315%	1
Biological Process: posttranscriptional gene silencing by RNA (GO:0035194);	2 out of 1011 0.19782393669634%	91 out of 23596 0.385658586201051%	1
Biological Process: cellular protein complex assembly (GO:0043623);	1 out of 1011 0.0989119683481701%	54 out of 23596 0.228852347855569%	1
Biological Process: regulation of alternative nuclear mRNA splicing, via spliceosome (GO:0000381);	1 out of 1011 0.0989119683481701%	54 out of 23596 0.228852347855569%	1
Biological Process: secretion by cell (GO:0032940);	1 out of 1011 0.0989119683481701%	54 out of 23596 0.228852347855569%	1
Biological Process: defense response to bacterium, incompatible interaction (GO:0009816);	5 out of 1011 0.494559841740851%	187 out of 23596 0.792507204610951%	1
Biological Process: histone methylation (GO:0016571);	3 out of 1011 0.29673590504451%	125 out of 23596 0.529750805221224%	1
Biological Process: defense response by callose deposition in cell wall (GO:0052544);	6 out of 1011 0.593471810089021%	218 out of 23596 0.923885404305815%	1
Biological Process: nucleobase-containing compound biosynthetic process (GO:0034654);	1 out of 1011 0.0989119683481701%	55 out of 23596 0.233090354297339%	1
Biological Process: positive regulation of cellular process (GO:0048522);	9 out of 1011 0.890207715133531%	307 out of 23596 1.30106797762333%	1
Biological Process: response to insect (GO:0009625);	4 out of 1011 0.395647873392681%	159 out of 23596 0.673843024241397%	1
Biological Process: multicellular organismal process (GO:0032501);	2 out of 1011 0.19782393669634%	94 out of 23596 0.39837260552636%	1
Biological Process: response to gamma radiation (GO:0010332);	4 out of 1011 0.395647873392681%	160 out of 23596 0.678081030683167%	1
Biological Process: positive regulation of growth rate (GO:0040010);	5 out of 1011 0.494559841740851%	191 out of 23596 0.80945923037803%	1
Biological Process: G1/S transition of mitotic cell cycle (GO:0000082);	1 out of 1011 0.0989119683481701%	57 out of 23596 0.241566367180878%	1
Biological Process: red, far-red light phototransduction (GO:0009585);	1 out of 1011 0.0989119683481701%	57 out of 23596 0.241566367180878%	1
Biological Process: synapsis (GO:0007129);	3 out of 1011 0.29673590504451%	129 out of 23596 0.546702830988303%	1
Biological Process: cellular response to hydrogen peroxide (GO:0070301);	1 out of 1011 0.0989119683481701%	58 out of 23596 0.245804373622648%	1
Biological Process: response to ionizing radiation (GO:0010212);	1 out of 1011 0.0989119683481701%	58 out of 23596 0.245804373622648%	1
Biological Process: L-phenylalanine catabolic process (GO:0006559);	1 out of 1011 0.0989119683481701%	58 out of 23596 0.245804373622648%	1
Biological Process: RNA splicing, via endonucleolytic cleavage and ligation (GO:0000394);	7 out of 1011 0.692383778437191%	254 out of 23596 1.07645363620953%	1
Biological Process: positive regulation of organelle organization (GO:0010638);	2 out of 1011 0.19782393669634%	97 out of 23596 0.41108662485167%	1
Biological Process: regulation of signal transduction (GO:0009966);	2 out of 1011 0.19782393669634%	97 out of 23596 0.41108662485167%	1
Biological Process: nucleotide biosynthetic process (GO:0009165);	4 out of 1011 0.395647873392681%	164 out of 23596 0.695033056450246%	1
Biological Process: xylan metabolic process (GO:0045491);	4 out of 1011 0.395647873392681%	165 out of 23596 0.699271062892016%	1
Biological Process: floral organ formation (GO:0048449);	4 out of 1011 0.395647873392681%	166 out of 23596 0.703509069333785%	1
Biological Process: oxidoreduction coenzyme metabolic process (GO:0006733);	2 out of 1011 0.19782393669634%	99 out of 23596 0.419562637735209%	1
Biological Process: response to misfolded protein (GO:0051788);	11 out of 1011 1.08803165182987%	374 out of 23596 1.5850144092219%	1
Biological Process: regulation of mitotic cell cycle (GO:0007346);	1 out of 1011 0.0989119683481701%	62 out of 23596 0.262756399389727%	1
Biological Process: chromatin modification (GO:0016568);	2 out of 1011 0.19782393669634%	101 out of 23596 0.428038650618749%	1
Biological Process: spermatogenesis (GO:0007283);	2 out of 1011 0.19782393669634%	101 out of 23596 0.428038650618749%	1
Biological Process: lipid biosynthetic process (GO:0008610);	2 out of 1011 0.19782393669634%	101 out of 23596 0.428038650618749%	1
Biological Process: biosynthetic process (GO:0009058);	2 out of 1011 0.19782393669634%	101 out of 23596 0.428038650618749%	1
Biological Process: cell fate specification (GO:0001708);	2 out of 1011 0.19782393669634%	101 out of 23596 0.428038650618749%	1
Biological Process: double-strand break repair via homologous recombination (GO:0000724);	4 out of 1011 0.395647873392681%	169 out of 23596 0.716223088659095%	1
Biological Process: negative regulation of cellular process (GO:0048523);	6 out of 1011 0.593471810089021%	232 out of 23596 0.983217494490592%	1
Biological Process: mitotic spindle elongation (GO:0000022);	1 out of 1011 0.0989119683481701%	63 out of 23596 0.266994405831497%	1
Biological Process: iron-sulfur cluster assembly (GO:0016226);	5 out of 1011 0.494559841740851%	203 out of 23596 0.860315307679268%	1
Biological Process: endosomal transport (GO:0016197);	1 out of 1011 0.0989119683481701%	64 out of 23596 0.271232412273267%	1
Biological Process: nuclear division (GO:0000280);	1 out of 1011 0.0989119683481701%	64 out of 23596 0.271232412273267%	1
Biological Process: detection of external stimulus (GO:0009581);	1 out of 1011 0.0989119683481701%	64 out of 23596 0.271232412273267%	1
Biological Process: protein transport (GO:0015031);	5 out of 1011 0.494559841740851%	204 out of 23596 0.864553314121037%	1
Biological Process: microtubule cytoskeleton organization (GO:0000226);	7 out of 1011 0.692383778437191%	266 out of 23596 1.12730971351076%	1
Biological Process: tRNA processing (GO:0008033);	1 out of 1011 0.0989119683481701%	65 out of 23596 0.275470418715036%	1
Biological Process: postreplication repair (GO:0006301);	1 out of 1011 0.0989119683481701%	65 out of 23596 0.275470418715036%	1
Biological Process: cellular protein modification process (GO:0006464);	11 out of 1011 1.08803165182987%	386 out of 23596 1.63587048652314%	1
Biological Process: receptor-mediated endocytosis (GO:0006898);	4 out of 1011 0.395647873392681%	175 out of 23596 0.741651127309713%	1
Biological Process: phosphatidylinositol biosynthetic process (GO:0006661);	3 out of 1011 0.29673590504451%	142 out of 23596 0.60179691473131%	1
Biological Process: DNA methylation (GO:0006306);	8 out of 1011 0.791295746785361%	300 out of 23596 1.27140193253094%	1
Biological Process: nucleic acid phosphodiester bond hydrolysis (GO:0090305);	1 out of 1011 0.0989119683481701%	67 out of 23596 0.283946431598576%	1
Biological Process: ribosome biogenesis (GO:0042254);	3 out of 1011 0.29673590504451%	144 out of 23596 0.61027292761485%	1
Biological Process: mucilage biosynthetic process involved in seed coat development (GO:0048354);	1 out of 1011 0.0989119683481701%	68 out of 23596 0.288184438040346%	1
Biological Process: cell cycle (GO:0007049);	6 out of 1011 0.593471810089021%	242 out of 23596 1.02559755890829%	1
Biological Process: cell cycle process (GO:0022402);	7 out of 1011 0.692383778437191%	273 out of 23596 1.15697575860315%	1
Biological Process: gene expression (GO:0010467);	7 out of 1011 0.692383778437191%	273 out of 23596 1.15697575860315%	1
Biological Process: blood coagulation (GO:0007596);	2 out of 1011 0.19782393669634%	109 out of 23596 0.461942702152907%	1
Biological Process: methylglyoxal catabolic process to D-lactate (GO:0019243);	3 out of 1011 0.29673590504451%	145 out of 23596 0.61451093405662%	1
Biological Process: DNA-dependent DNA replication (GO:0006261);	3 out of 1011 0.29673590504451%	146 out of 23596 0.61874894049839%	1
Biological Process: regulation of chlorophyll biosynthetic process (GO:0010380);	2 out of 1011 0.19782393669634%	110 out of 23596 0.466180708594677%	1
Biological Process: gluconeogenesis (GO:0006094);	11 out of 1011 1.08803165182987%	394 out of 23596 1.6697745380573%	1
Biological Process: photomorphogenesis (GO:0009640);	12 out of 1011 1.18694362017804%	423 out of 23596 1.79267672486862%	1
Biological Process: regulation of cell division (GO:0051302);	3 out of 1011 0.29673590504451%	147 out of 23596 0.622986946940159%	1
Biological Process: nucleotide metabolic process (GO:0009117);	2 out of 1011 0.19782393669634%	112 out of 23596 0.474656721478217%	1
Biological Process: meiosis (GO:0007126);	3 out of 1011 0.29673590504451%	149 out of 23596 0.631462959823699%	1
Biological Process: root cap development (GO:0048829);	1 out of 1011 0.0989119683481701%	72 out of 23596 0.305136463807425%	1
Biological Process: cytokinesis by cell plate formation (GO:0000911);	9 out of 1011 0.890207715133531%	341 out of 23596 1.4451601966435%	1
Biological Process: nucleosome assembly (GO:0006334);	1 out of 1011 0.0989119683481701%	73 out of 23596 0.309374470249195%	1
Biological Process: stomatal lineage progression (GO:0010440);	1 out of 1011 0.0989119683481701%	74 out of 23596 0.313612476690965%	1
Biological Process: regulation of transcription from RNA polymerase II promoter (GO:0006357);	4 out of 1011 0.395647873392681%	188 out of 23596 0.796745211052721%	1
Biological Process: response to DNA damage stimulus (GO:0006974);	4 out of 1011 0.395647873392681%	188 out of 23596 0.796745211052721%	1
Biological Process: chromatin organization (GO:0006325);	1 out of 1011 0.0989119683481701%	75 out of 23596 0.317850483132734%	1
Biological Process: mitotic spindle organization (GO:0007052);	1 out of 1011 0.0989119683481701%	76 out of 23596 0.322088489574504%	1
Biological Process: proteolysis (GO:0006508);	17 out of 1011 1.68150346191889%	580 out of 23596 2.45804373622648%	1
Biological Process: gamete generation (GO:0007276);	1 out of 1011 0.0989119683481701%	77 out of 23596 0.326326496016274%	1
Biological Process: protein autoubiquitination (GO:0051865);	1 out of 1011 0.0989119683481701%	78 out of 23596 0.330564502458044%	1
Biological Process: DNA metabolic process (GO:0006259);	8 out of 1011 0.791295746785361%	321 out of 23596 1.3604000678081%	1
Biological Process: ncRNA metabolic process (GO:0034660);	2 out of 1011 0.19782393669634%	121 out of 23596 0.512798779454145%	1
Biological Process: protein deubiquitination (GO:0016579);	3 out of 1011 0.29673590504451%	159 out of 23596 0.673843024241397%	1
Biological Process: RNA metabolic process (GO:0016070);	7 out of 1011 0.692383778437191%	292 out of 23596 1.23749788099678%	1
Biological Process: cell migration (GO:0016477);	2 out of 1011 0.19782393669634%	122 out of 23596 0.517036785895915%	1
Biological Process: molting cycle, collagen and cuticulin-based cuticle (GO:0018996);	1 out of 1011 0.0989119683481701%	80 out of 23596 0.339040515341583%	1
Biological Process: reciprocal meiotic recombination (GO:0007131);	6 out of 1011 0.593471810089021%	262 out of 23596 1.11035768774369%	1
Biological Process: regulation of glucosinolate biosynthetic process (GO:0010439);	1 out of 1011 0.0989119683481701%	81 out of 23596 0.343278521783353%	1
Biological Process: intracellular protein transport (GO:0006886);	6 out of 1011 0.593471810089021%	264 out of 23596 1.11883370062722%	1
Biological Process: cinnamic acid biosynthetic process (GO:0009800);	1 out of 1011 0.0989119683481701%	82 out of 23596 0.347516528225123%	1
Biological Process: fatty acid biosynthetic process (GO:0006633);	4 out of 1011 0.395647873392681%	199 out of 23596 0.843363281912188%	1
Biological Process: protein N-linked glycosylation (GO:0006487);	5 out of 1011 0.494559841740851%	233 out of 23596 0.987455500932361%	1
Biological Process: induced systemic resistance (GO:0009682);	1 out of 1011 0.0989119683481701%	83 out of 23596 0.351754534666893%	1
Biological Process: transcription initiation from RNA polymerase II promoter (GO:0006367);	1 out of 1011 0.0989119683481701%	83 out of 23596 0.351754534666893%	1
Biological Process: calcium-mediated signaling (GO:0019722);	3 out of 1011 0.29673590504451%	166 out of 23596 0.703509069333785%	1
Biological Process: determination of adult lifespan (GO:0008340);	3 out of 1011 0.29673590504451%	166 out of 23596 0.703509069333785%	1
Biological Process: cellular catabolic process (GO:0044248);	2 out of 1011 0.19782393669634%	129 out of 23596 0.546702830988303%	1
Biological Process: transcription, DNA-dependent (GO:0006351);	10 out of 1011 0.989119683481701%	397 out of 23596 1.68248855738261%	1
Biological Process: ovule development (GO:0048481);	11 out of 1011 1.08803165182987%	428 out of 23596 1.81386675707747%	1
Biological Process: protein polyubiquitination (GO:0000209);	2 out of 1011 0.19782393669634%	131 out of 23596 0.555178843871843%	1
Biological Process: photoperiodism, flowering (GO:0048573);	5 out of 1011 0.494559841740851%	242 out of 23596 1.02559755890829%	1
Biological Process: spindle assembly (GO:0051225);	1 out of 1011 0.0989119683481701%	89 out of 23596 0.377182573317511%	1
Biological Process: production of small RNA involved in gene silencing by RNA (GO:0070918);	1 out of 1011 0.0989119683481701%	89 out of 23596 0.377182573317511%	1
Biological Process: endocytosis (GO:0006897);	1 out of 1011 0.0989119683481701%	89 out of 23596 0.377182573317511%	1
Biological Process: regulation of DNA replication (GO:0006275);	3 out of 1011 0.29673590504451%	172 out of 23596 0.728937107984404%	1
Biological Process: cell division (GO:0051301);	10 out of 1011 0.989119683481701%	404 out of 23596 1.712154602475%	1
Biological Process: regulation of gene expression, epigenetic (GO:0040029);	2 out of 1011 0.19782393669634%	135 out of 23596 0.572130869638922%	1
Biological Process: establishment of localization in cell (GO:0051649);	1 out of 1011 0.0989119683481701%	91 out of 23596 0.385658586201051%	1
Biological Process: N-terminal protein myristoylation (GO:0006499);	5 out of 1011 0.494559841740851%	246 out of 23596 1.04254958467537%	1
Biological Process: vernalization response (GO:0010048);	3 out of 1011 0.29673590504451%	175 out of 23596 0.741651127309713%	1
Biological Process: sister chromatid cohesion (GO:0007062);	7 out of 1011 0.692383778437191%	313 out of 23596 1.32649601627394%	1
Biological Process: telomere maintenance (GO:0000723);	1 out of 1011 0.0989119683481701%	92 out of 23596 0.389896592642821%	1
Biological Process: trichome morphogenesis (GO:0010090);	9 out of 1011 0.890207715133531%	377 out of 23596 1.59772842854721%	1
Biological Process: response to drug (GO:0042493);	2 out of 1011 0.19782393669634%	137 out of 23596 0.580606882522461%	1
Biological Process: positive regulation of cell proliferation (GO:0008284);	6 out of 1011 0.593471810089021%	282 out of 23596 1.19511781657908%	1
Biological Process: regulation of macromolecule metabolic process (GO:0060255);	3 out of 1011 0.29673590504451%	182 out of 23596 0.771317172402102%	1
Biological Process: pollen tube development (GO:0048868);	1 out of 1011 0.0989119683481701%	97 out of 23596 0.41108662485167%	1
Biological Process: primary shoot apical meristem specification (GO:0010072);	2 out of 1011 0.19782393669634%	145 out of 23596 0.61451093405662%	1
Biological Process: protein targeting to mitochondrion (GO:0006626);	2 out of 1011 0.19782393669634%	146 out of 23596 0.61874894049839%	1
Biological Process: GTP catabolic process (GO:0006184);	4 out of 1011 0.395647873392681%	225 out of 23596 0.953551449398203%	1
Biological Process: embryonic pattern specification (GO:0009880);	1 out of 1011 0.0989119683481701%	104 out of 23596 0.440752669944058%	1
Biological Process: nucleic acid metabolic process (GO:0090304);	6 out of 1011 0.593471810089021%	301 out of 23596 1.27563993897271%	1
Biological Process: DNA damage response, signal transduction by p53 class mediator resulting in cell cycle arrest (GO:0006977);	1 out of 1011 0.0989119683481701%	106 out of 23596 0.449228682827598%	1
Biological Process: cellular response to drug (GO:0035690);	1 out of 1011 0.0989119683481701%	106 out of 23596 0.449228682827598%	1
Biological Process: negative regulation of cell proliferation (GO:0008285);	2 out of 1011 0.19782393669634%	153 out of 23596 0.648414985590778%	1
Biological Process: regulation of G2/M transition of mitotic cell cycle (GO:0010389);	1 out of 1011 0.0989119683481701%	107 out of 23596 0.453466689269368%	1
Biological Process: lateral root formation (GO:0010311);	1 out of 1011 0.0989119683481701%	107 out of 23596 0.453466689269368%	1
Biological Process: G2 phase of mitotic cell cycle (GO:0000085);	1 out of 1011 0.0989119683481701%	108 out of 23596 0.457704695711137%	1
Biological Process: DNA repair (GO:0006281);	7 out of 1011 0.692383778437191%	340 out of 23596 1.44092219020173%	1
Biological Process: locomotion (GO:0040011);	3 out of 1011 0.29673590504451%	197 out of 23596 0.834887269028649%	1
Biological Process: cytoskeleton organization (GO:0007010);	4 out of 1011 0.395647873392681%	237 out of 23596 1.00440752669944%	1
Biological Process: DNA endoreduplication (GO:0042023);	2 out of 1011 0.19782393669634%	159 out of 23596 0.673843024241397%	1
Biological Process: regulation of transcription, DNA-dependent (GO:0006355);	45 out of 1011 4.45103857566766%	1447 out of 23596 6.13239532124089%	1
Biological Process: proteasomal protein catabolic process (GO:0010498);	2 out of 1011 0.19782393669634%	165 out of 23596 0.699271062892016%	1
Biological Process: protein glycosylation (GO:0006486);	4 out of 1011 0.395647873392681%	246 out of 23596 1.04254958467537%	1
Biological Process: mitosis (GO:0007067);	3 out of 1011 0.29673590504451%	209 out of 23596 0.885743346329886%	1
Biological Process: DNA replication initiation (GO:0006270);	1 out of 1011 0.0989119683481701%	119 out of 23596 0.504322766570605%	1
Biological Process: embryo development ending in seed dormancy (GO:0009793);	26 out of 1011 2.57171117705242%	940 out of 23596 3.9837260552636%	1
Biological Process: neurogenesis (GO:0022008);	1 out of 1011 0.0989119683481701%	122 out of 23596 0.517036785895915%	1
Biological Process: positive regulation of transcription from RNA polymerase II promoter (GO:0045944);	3 out of 1011 0.29673590504451%	226 out of 23596 0.957789455839973%	1
Biological Process: cotyledon vascular tissue pattern formation (GO:0010588);	1 out of 1011 0.0989119683481701%	133 out of 23596 0.563654856755382%	1
Biological Process: transport (GO:0006810);	10 out of 1011 0.989119683481701%	483 out of 23596 2.04695711137481%	1
Biological Process: cullin deneddylation (GO:0010388);	2 out of 1011 0.19782393669634%	186 out of 23596 0.788269198169181%	1
Biological Process: reproduction (GO:0000003);	4 out of 1011 0.395647873392681%	274 out of 23596 1.16121376504492%	1
Biological Process: regulation of cell differentiation (GO:0045595);	1 out of 1011 0.0989119683481701%	142 out of 23596 0.60179691473131%	1
Biological Process: leaf vascular tissue pattern formation (GO:0010305);	2 out of 1011 0.19782393669634%	196 out of 23596 0.830649262586879%	1
Biological Process: seed development (GO:0048316);	3 out of 1011 0.29673590504451%	241 out of 23596 1.02135955246652%	1
Biological Process: pyrimidine ribonucleotide biosynthetic process (GO:0009220);	2 out of 1011 0.19782393669634%	203 out of 23596 0.860315307679268%	1
Biological Process: viral reproduction (GO:0016032);	1 out of 1011 0.0989119683481701%	153 out of 23596 0.648414985590778%	1
Biological Process: post-translational protein modification (GO:0043687);	3 out of 1011 0.29673590504451%	253 out of 23596 1.07221562976776%	1
Biological Process: regulation of chromosome organization (GO:0033044);	1 out of 1011 0.0989119683481701%	157 out of 23596 0.665367011357857%	1
Biological Process: cytokinesis (GO:0000910);	1 out of 1011 0.0989119683481701%	159 out of 23596 0.673843024241397%	1
Biological Process: mRNA export from nucleus (GO:0006406);	1 out of 1011 0.0989119683481701%	166 out of 23596 0.703509069333785%	1
Biological Process: embryo development ending in birth or egg hatching (GO:0009792);	9 out of 1011 0.890207715133531%	500 out of 23596 2.1190032208849%	1
Biological Process: phloem or xylem histogenesis (GO:0010087);	1 out of 1011 0.0989119683481701%	169 out of 23596 0.716223088659095%	1
Biological Process: protein ubiquitination (GO:0016567);	13 out of 1011 1.28585558852621%	642 out of 23596 2.72080013561621%	1
Biological Process: vesicle-mediated transport (GO:0016192);	5 out of 1011 0.494559841740851%	359 out of 23596 1.52144431259536%	1
Biological Process: RNA-dependent DNA replication (GO:0006278);	1 out of 1011 0.0989119683481701%	180 out of 23596 0.762841159518562%	1
Biological Process: nematode larval development (GO:0002119);	5 out of 1011 0.494559841740851%	379 out of 23596 1.60620444143075%	1
Biological Process: macromolecule metabolic process (GO:0043170);	2 out of 1011 0.19782393669634%	247 out of 23596 1.04678759111714%	1
Biological Process: DNA recombination (GO:0006310);	2 out of 1011 0.19782393669634%	247 out of 23596 1.04678759111714%	1
Biological Process: RNA processing (GO:0006396);	4 out of 1011 0.395647873392681%	341 out of 23596 1.4451601966435%	1
Biological Process: mitotic cell cycle (GO:0000278);	5 out of 1011 0.494559841740851%	410 out of 23596 1.73758264112561%	1
Biological Process: negative regulation of apoptotic process (GO:0043066);	1 out of 1011 0.0989119683481701%	230 out of 23596 0.974741481607052%	1
Biological Process: nuclear-transcribed mRNA catabolic process, nonsense-mediated decay (GO:0000184);	2 out of 1011 0.19782393669634%	291 out of 23596 1.23325987455501%	1
Biological Process: mRNA splicing, via spliceosome (GO:0000398);	2 out of 1011 0.19782393669634%	305 out of 23596 1.29259196473979%	1
Biological Process: ubiquitin-dependent protein catabolic process (GO:0006511);	3 out of 1011 0.29673590504451%	375 out of 23596 1.58925241566367%	1
Biological Process: translation (GO:0006412);	5 out of 1011 0.494559841740851%	508 out of 23596 2.15290727241905%	1
Biological Process: translational elongation (GO:0006414);	1 out of 1011 0.0989119683481701%	299 out of 23596 1.26716392608917%	1
Biological Process: DNA integration (GO:0015074);	1 out of 1011 0.0989119683481701%	305 out of 23596 1.29259196473979%	1
Biological Process: RNA methylation (GO:0001510);	1 out of 1011 0.0989119683481701%	307 out of 23596 1.30106797762333%	1

## Sheet: GO0010119
GO ID	Gene ID	FDR	log2FC	regulated	COG_class	COG_class_annotation	GO_annotation	KEGG_annotation	Swissprot_annotation	nr_annotation
GO:0010119	gi_351603123_gb_JP457482.1	3.85e-06	-3.47381	down	--	--	Molecular Function: protein binding (GO:0005515);; Molecular Function: ATP binding (GO:0005524);; Cellular Component: nucleus (GO:0005634);; Cellular Component: vacuole (GO:0005773);; Cellular Component: plasma membrane (GO:0005886);; Biological Process: ATP catabolic process (GO:0006200);; Biological Process: ATP biosynthetic process (GO:0006754);; Biological Process: cation transport (GO:000681…	K01535|1e-156|vvi:100242786|hypothetical protein LOC100242786	Plasma membrane ATPase 4 OS=Nicotiana plumbaginifolia GN=PMA4 PE=1 SV=1	Plasma membrane ATPase 4 isoform 2 [Theobroma cacao]
GO:0010119	gi_351591275_gb_JP449724.1	4.1e-14	-3.34844	down	--	--	Molecular Function: structural constituent of cell wall (GO:0005199);; Cellular Component: extracellular region (GO:0005576);; Cellular Component: cytosol (GO:0005829);; Biological Process: syncytium formation (GO:0006949);; Cellular Component: plant-type cell wall (GO:0009505);; Cellular Component: plasmodesma (GO:0009506);; Cellular Component: chloroplast (GO:0009507);; Biological Process: plan…	--	Expansin-A8 OS=Arabidopsis thaliana GN=EXPA8 PE=2 SV=1	expansin 2 [Citrus sinensis]
GO:0010119	gi_351627543_gb_JP480426.1	0.00285243	-2.63507	down	[RTKL]	--	Biological Process: MAPK cascade (GO:0000165);; Molecular Function: calmodulin-dependent protein kinase activity (GO:0004683);; Molecular Function: calcium-dependent protein kinase C activity (GO:0004698);; Molecular Function: calcium ion binding (GO:0005509);; Molecular Function: protein binding (GO:0005515);; Molecular Function: ATP binding (GO:0005524);; Cellular Component: nucleus (GO:0005634…	K13412|0.0|vvi:100250838|hypothetical protein LOC100250838	Calcium-dependent protein kinase 24 OS=Arabidopsis thaliana GN=CPK24 PE=2 SV=1	unnamed protein product [Vitis vinifera]
GO:0010119	gi_351591331_gb_JP449779.1	3.72e-05	-2.32805	down	--	--	Molecular Function: two-component response regulator activity (GO:0000156);; Molecular Function: DNA binding (GO:0003677);; Molecular Function: sequence-specific DNA binding transcription factor activity (GO:0003700);; Molecular Function: binding (GO:0005488);; Molecular Function: protein binding (GO:0005515);; Cellular Component: nucleus (GO:0005634);; Biological Process: rRNA processing (GO:000…	--	Protein PHR1-LIKE 1 OS=Arabidopsis thaliana GN=PHL1 PE=1 SV=1	hypothetical protein PRUPE_ppa005159mg [Prunus persica]
GO:0010119	gi_351611524_gb_JP465825.1	4.54e-20	-2.31691	down	--	--	Molecular Function: structural constituent of cell wall (GO:0005199);; Cellular Component: extracellular region (GO:0005576);; Cellular Component: cytosol (GO:0005829);; Biological Process: syncytium formation (GO:0006949);; Cellular Component: plant-type cell wall (GO:0009505);; Cellular Component: plasmodesma (GO:0009506);; Cellular Component: chloroplast (GO:0009507);; Biological Process: plan…	--	Expansin-A6 OS=Arabidopsis thaliana GN=EXPA6 PE=2 SV=2	PREDICTED: expansin-A4-like [Glycine max]
GO:0010119	gi_351617805_gb_JP472106.1	3.82e-21	-2.1103	down	--	--	Molecular Function: structural constituent of cell wall (GO:0005199);; Cellular Component: extracellular region (GO:0005576);; Cellular Component: cytosol (GO:0005829);; Biological Process: syncytium formation (GO:0006949);; Cellular Component: plant-type cell wall (GO:0009505);; Cellular Component: plasmodesma (GO:0009506);; Cellular Component: chloroplast (GO:0009507);; Biological Process: plan…	--	Expansin-A15 OS=Arabidopsis thaliana GN=EXPA15 PE=2 SV=2	hypothetical protein POPTRDRAFT_659295 [Populus trichocarpa]
GO:0010119	gi_351611219_gb_JP465520.1	1.71e-08	-1.90715	down	--	--	Molecular Function: structural constituent of cell wall (GO:0005199);; Cellular Component: extracellular region (GO:0005576);; Cellular Component: cytosol (GO:0005829);; Biological Process: syncytium formation (GO:0006949);; Cellular Component: plant-type cell wall (GO:0009505);; Cellular Component: plasmodesma (GO:0009506);; Cellular Component: chloroplast (GO:0009507);; Biological Process: plan…	--	Expansin-A3 OS=Arabidopsis thaliana GN=EXPA3 PE=2 SV=1	expansin 11 precursor [Rumex palustris]
GO:0010119	gi_351621991_gb_JP476292.1	0.00372143	-1.50098	down	--	--	Molecular Function: structural constituent of cell wall (GO:0005199);; Cellular Component: extracellular region (GO:0005576);; Cellular Component: cytosol (GO:0005829);; Biological Process: syncytium formation (GO:0006949);; Cellular Component: plant-type cell wall (GO:0009505);; Cellular Component: plasmodesma (GO:0009506);; Cellular Component: chloroplast (GO:0009507);; Biological Process: resp…	--	Expansin-A8 OS=Arabidopsis thaliana GN=EXPA8 PE=2 SV=1	expansin 5 [Ziziphus jujuba]
GO:0010119	gi_351596344_gb_JP450901.1	5.09e-09	-1.42081	down	--	--	Molecular Function: protein binding (GO:0005515);; Molecular Function: ATP binding (GO:0005524);; Cellular Component: nucleus (GO:0005634);; Cellular Component: vacuole (GO:0005773);; Cellular Component: plasma membrane (GO:0005886);; Biological Process: ATP catabolic process (GO:0006200);; Biological Process: ATP biosynthetic process (GO:0006754);; Biological Process: cation transport (GO:000681…	K01535|0.0|vvi:100242786|hypothetical protein LOC100242786	Plasma membrane ATPase 4 OS=Nicotiana plumbaginifolia GN=PMA4 PE=1 SV=1	hypothetical protein VITISV_014422 [Vitis vinifera]
GO:0010119	gi_351595865_gb_JP450425.1	0.000283422	-1.10914	down	--	--	Molecular Function: two-component response regulator activity (GO:0000156);; Molecular Function: DNA binding (GO:0003677);; Molecular Function: sequence-specific DNA binding transcription factor activity (GO:0003700);; Molecular Function: binding (GO:0005488);; Molecular Function: protein binding (GO:0005515);; Cellular Component: nucleus (GO:0005634);; Biological Process: rRNA processing (GO:000…	--	Myb family transcription factor APL OS=Arabidopsis thaliana GN=APL PE=2 SV=2	hypothetical protein PRUPE_ppa006561mg [Prunus persica]
GO:0010119	gi_351599628_gb_JP454117.1	4.76e-06	-1.08625	down	--	--	Biological Process: MAPK cascade (GO:0000165);; Biological Process: respiratory burst involved in defense response (GO:0002679);; Molecular Function: peroxidase activity (GO:0004601);; Molecular Function: calcium ion binding (GO:0005509);; Cellular Component: nucleus (GO:0005634);; Cellular Component: Golgi apparatus (GO:0005794);; Cellular Component: integral to plasma membrane (GO:0005887);; Bi…	--	Putative respiratory burst oxidase homolog protein H OS=Arabidopsis thaliana GN=RBOHH PE=3 SV=1	PREDICTED: putative respiratory burst oxidase homolog protein H-like [Cicer arietinum]
GO:0010119	gi_351605867_gb_JP460208.1	4.57e-08	-3.2829	down	[E]	Amino acid transport and metabolism	Molecular Function: transporter activity (GO:0005215);; Molecular Function: calcium ion binding (GO:0005509);; Molecular Function: protein binding (GO:0005515);; Cellular Component: Golgi apparatus (GO:0005794);; Cellular Component: plasma membrane (GO:0005886);; Biological Process: polysaccharide metabolic process (GO:0005976);; Biological Process: nitrogen compound metabolic process (GO:0006807…	--	Nitrate transporter 1.2 OS=Arabidopsis thaliana GN=NRT1.2 PE=1 SV=1	hypothetical protein PRUPE_ppa003360mg [Prunus persica]
GO:0010119	gi_351602034_gb_JP456469.1	0.00185323	-2.66949	down	[E]	Amino acid transport and metabolism	Molecular Function: transporter activity (GO:0005215);; Molecular Function: calcium ion binding (GO:0005509);; Molecular Function: protein binding (GO:0005515);; Cellular Component: Golgi apparatus (GO:0005794);; Cellular Component: plasma membrane (GO:0005886);; Biological Process: polysaccharide metabolic process (GO:0005976);; Biological Process: nitrogen compound metabolic process (GO:0006807…	--	Nitrate transporter 1.2 OS=Arabidopsis thaliana GN=NRT1.2 PE=1 SV=1	hypothetical protein PRUPE_ppa003360mg [Prunus persica]
GO:0010119	gi_351599295_gb_JP453792.1	1.29e-06	-2.60726	down	[E]	Amino acid transport and metabolism	Molecular Function: protein binding (GO:0005515);; Cellular Component: Golgi apparatus (GO:0005794);; Cellular Component: plasma membrane (GO:0005886);; Biological Process: oligopeptide transport (GO:0006857);; Biological Process: intra-Golgi vesicle-mediated transport (GO:0006891);; Biological Process: response to water deprivation (GO:0009414);; Cellular Component: plasmodesma (GO:0009506);; Bi…	--	Nitrate transporter 1.1 OS=Arabidopsis thaliana GN=NRT1.1 PE=1 SV=1	nitrate transporter [Prunus persica]
GO:0010119	gi_351624285_gb_JP478586.1	4.72e-14	-2.58737	down	[E]	Amino acid transport and metabolism	Molecular Function: protein binding (GO:0005515);; Cellular Component: Golgi apparatus (GO:0005794);; Cellular Component: plasma membrane (GO:0005886);; Biological Process: oligopeptide transport (GO:0006857);; Biological Process: response to water deprivation (GO:0009414);; Cellular Component: plasmodesma (GO:0009506);; Biological Process: response to wounding (GO:0009611);; Biological Process: …	--	Nitrate transporter 1.1 OS=Arabidopsis thaliana GN=NRT1.1 PE=1 SV=1	nitrate transporter [Prunus persica]
GO:0010119	gi_351625553_gb_JP479854.1	7.63e-07	#NAME?	down	[E]	Amino acid transport and metabolism	Molecular Function: protein binding (GO:0005515);; Cellular Component: Golgi apparatus (GO:0005794);; Cellular Component: plasma membrane (GO:0005886);; Biological Process: oligopeptide transport (GO:0006857);; Biological Process: intra-Golgi vesicle-mediated transport (GO:0006891);; Biological Process: response to water deprivation (GO:0009414);; Cellular Component: plasmodesma (GO:0009506);; Bi…	--	Nitrate transporter 1.1 OS=Arabidopsis thaliana GN=NRT1.1 PE=1 SV=1	nitrate transporter [Prunus persica]
GO:0010119	gi_351613155_gb_JP467456.1	0.000129381	-1.41586	down	[R]	General function prediction only	Biological Process: microtubule cytoskeleton organization (GO:0000226);; Biological Process: RNA splicing, via endonucleolytic cleavage and ligation (GO:0000394);; Molecular Function: GTPase activity (GO:0003924);; Molecular Function: sphingomyelin phosphodiesterase activity (GO:0004767);; Molecular Function: GTP binding (GO:0005525);; Cellular Component: extracellular region (GO:0005576);; Cellu…	K04392|1e-135|vvi:100242140|similar to Rac-like GTP-binding protein RAC2	Rac-like GTP-binding protein RAC2 OS=Lotus japonicus GN=RAC2 PE=2 SV=1	PREDICTED: Rac-like GTP-binding protein ARAC5 [Vitis vinifera]
GO:0010119	gi_351615730_gb_JP470031.1	5.9e-07	-2.45565	down	[P]	Inorganic ion transport and metabolism	Molecular Function: carbonate dehydratase activity (GO:0004089);; Molecular Function: protein binding (GO:0005515);; Cellular Component: cytosol (GO:0005829);; Biological Process: metabolic process (GO:0008152);; Molecular Function: zinc ion binding (GO:0008270);; Biological Process: response to cold (GO:0009409);; Cellular Component: chloroplast thylakoid membrane (GO:0009535);; Cellular Compone…	K01673|1e-154|pop:POPTR_706715|hypothetical protein	Carbonic anhydrase, chloroplastic OS=Pisum sativum PE=1 SV=1	PREDICTED: carbonic anhydrase, chloroplastic [Glycine max]
GO:0010119	gi_351617925_gb_JP472226.1	1.35e-08	-1.44788	down	[P]	Inorganic ion transport and metabolism	Molecular Function: protein binding (GO:0005515);; Molecular Function: ATP binding (GO:0005524);; Cellular Component: nucleus (GO:0005634);; Cellular Component: vacuole (GO:0005773);; Cellular Component: plasma membrane (GO:0005886);; Biological Process: ATP catabolic process (GO:0006200);; Biological Process: ATP biosynthetic process (GO:0006754);; Biological Process: cation transport (GO:000681…	K01535|0.0|vvi:100242786|hypothetical protein LOC100242786	Plasma membrane ATPase 4 OS=Nicotiana plumbaginifolia GN=PMA4 PE=1 SV=1	Plasma membrane ATPase 4 isoform 2 [Theobroma cacao]
GO:0010119	gi_351617853_gb_JP472154.1	8.08e-07	-1.19039	down	[P]	Inorganic ion transport and metabolism	Molecular Function: carbonate dehydratase activity (GO:0004089);; Cellular Component: cytosol (GO:0005829);; Cellular Component: plasma membrane (GO:0005886);; Molecular Function: zinc ion binding (GO:0008270);; Biological Process: cyanate catabolic process (GO:0009440);; Cellular Component: chloroplast stroma (GO:0009570);; Cellular Component: chloroplast envelope (GO:0009941);; Biological Proce…	K01673|1e-124|rcu:RCOM_0528440|carbonic anhydrase, putative (EC:4.2.1.1)	Carbonic anhydrase, chloroplastic OS=Nicotiana tabacum PE=2 SV=1	carbonic anhydrase, putative [Ricinus communis]
GO:0010119	gi_351623634_gb_JP477935.1	6.55e-08	1.28883	up	[RTKL]	--	Molecular Function: protein serine/threonine kinase activity (GO:0004674);; Molecular Function: protein binding (GO:0005515);; Molecular Function: ATP binding (GO:0005524);; Cellular Component: nucleus (GO:0005634);; Cellular Component: cytosol (GO:0005829);; Cellular Component: plasma membrane (GO:0005886);; Biological Process: sucrose metabolic process (GO:0005985);; Biological Process: protein…	K14498|0.0|rcu:RCOM_0855720|Serine/threonine-protein kinase SAPK3, putative (EC:2.7.11.1)	Serine/threonine-protein kinase SAPK3 OS=Oryza sativa subsp. japonica GN=SAPK3 PE=1 SV=1	Serine/threonine-protein kinase SAPK3, putative [Ricinus communis]
GO:0010119	gi_351600024_gb_JP454501.1	1.49e-08	1.80634	up	[RTKL]	--	Biological Process: MAPK cascade (GO:0000165);; Molecular Function: calmodulin-dependent protein kinase activity (GO:0004683);; Molecular Function: calcium ion binding (GO:0005509);; Molecular Function: protein binding (GO:0005515);; Molecular Function: ATP binding (GO:0005524);; Cellular Component: nucleus (GO:0005634);; Cellular Component: vacuole (GO:0005773);; Cellular Component: peroxisome (…	K13412|0.0|rcu:RCOM_0422070|calcium-dependent protein kinase, putative (EC:2.7.11.17)	Calcium-dependent protein kinase 1 OS=Arabidopsis thaliana GN=CPK1 PE=1 SV=1	hypothetical protein PRUPE_ppa002734mg [Prunus persica]
GO:0010119	gi_351605811_gb_JP460152.1	1.81e-19	2.02009	up	[RTKL]	--	Molecular Function: protein serine/threonine kinase activity (GO:0004674);; Molecular Function: ATP binding (GO:0005524);; Cellular Component: nucleus (GO:0005634);; Cellular Component: vacuole (GO:0005773);; Cellular Component: peroxisome (GO:0005777);; Cellular Component: endoplasmic reticulum membrane (GO:0005789);; Cellular Component: cytosol (GO:0005829);; Cellular Component: plasma membrane…	--	Phosphoenolpyruvate carboxylase kinase 1 OS=Arabidopsis thaliana GN=PPCK1 PE=1 SV=1	hypothetical protein PRUPE_ppa009865mg [Prunus persica]
GO:0010119	gi_351604202_gb_JP458555.1	1.14e-11	2.62431	up	[E]	Amino acid transport and metabolism	Molecular Function: transporter activity (GO:0005215);; Molecular Function: protein binding (GO:0005515);; Cellular Component: Golgi apparatus (GO:0005794);; Cellular Component: plasma membrane (GO:0005886);; Biological Process: oligopeptide transport (GO:0006857);; Biological Process: response to water deprivation (GO:0009414);; Cellular Component: plasmodesma (GO:0009506);; Biological Process: …	--	Nitrate transporter 1.4 OS=Arabidopsis thaliana GN=NRT1.4 PE=1 SV=1	Major facilitator superfamily protein isoform 2 [Theobroma cacao]
GO:0010119	gi_351620096_gb_JP474397.1	8.17e-08	1.36061	up	[T]	Signal transduction mechanisms	Molecular Function: protein serine/threonine phosphatase activity (GO:0004722);; Molecular Function: protein binding (GO:0005515);; Cellular Component: nucleus (GO:0005634);; Cellular Component: Golgi apparatus (GO:0005794);; Cellular Component: cytosol (GO:0005829);; Biological Process: negative regulation of protein kinase activity (GO:0006469);; Biological Process: protein dephosphorylation (G…	K14497|1e-177|rcu:RCOM_1046460|protein phosphatase 2c, putative (EC:3.1.3.16)	Protein phosphatase 2C 77 OS=Arabidopsis thaliana GN=ABI2 PE=1 SV=1	hypothetical protein PRUPE_ppa005286mg [Prunus persica]
GO:0010119	gi_351618741_gb_JP473042.1	1.05e-14	1.72986	up	[T]	Signal transduction mechanisms	Molecular Function: protein serine/threonine phosphatase activity (GO:0004722);; Molecular Function: protein binding (GO:0005515);; Cellular Component: nucleus (GO:0005634);; Cellular Component: Golgi apparatus (GO:0005794);; Cellular Component: cytosol (GO:0005829);; Biological Process: negative regulation of protein kinase activity (GO:0006469);; Biological Process: protein dephosphorylation (G…	K14497|0.0|vvi:100243875|hypothetical protein LOC100243875	Probable protein phosphatase 2C 6 OS=Oryza sativa subsp. japonica GN=Os01g0583100 PE=2 SV=1	hypothetical protein PRUPE_ppa006926mg [Prunus persica]
GO:0010119	gi_351623983_gb_JP478284.1	4.1e-14	1.74154	up	[T]	Signal transduction mechanisms	Molecular Function: phosphoprotein phosphatase activity (GO:0004721);; Molecular Function: protein serine/threonine phosphatase activity (GO:0004722);; Molecular Function: protein binding (GO:0005515);; Cellular Component: nucleus (GO:0005634);; Cellular Component: Golgi apparatus (GO:0005794);; Cellular Component: cytosol (GO:0005829);; Biological Process: negative regulation of protein kinase a…	K14497|1e-116|rcu:RCOM_1579770|protein phosphatase 2c, putative (EC:3.1.3.16)	Probable protein phosphatase 2C 8 OS=Oryza sativa subsp. japonica GN=Os01g0656200 PE=2 SV=1	hypothetical protein PRUPE_ppa016016mg [Prunus persica]
GO:0010119	gi_351623117_gb_JP477418.1	2.96e-24	2.50435	up	[T]	Signal transduction mechanisms	Molecular Function: phosphoprotein phosphatase activity (GO:0004721);; Molecular Function: protein serine/threonine phosphatase activity (GO:0004722);; Molecular Function: protein binding (GO:0005515);; Cellular Component: nucleus (GO:0005634);; Cellular Component: Golgi apparatus (GO:0005794);; Cellular Component: cytosol (GO:0005829);; Cellular Component: plasma membrane (GO:0005886);; Biologic…	K14497|1e-160|pop:POPTR_768154|hypothetical protein	Probable protein phosphatase 2C 78 OS=Arabidopsis thaliana GN=At5g59220 PE=2 SV=1	Highly ABA-induced PP2C gene 2 isoform 1 [Theobroma cacao]
GO:0010119	gi_351600776_gb_JP455237.1	4.45e-11	3.15327	up	[T]	Signal transduction mechanisms	Molecular Function: protein serine/threonine phosphatase activity (GO:0004722);; Molecular Function: protein binding (GO:0005515);; Cellular Component: nucleus (GO:0005634);; Cellular Component: Golgi apparatus (GO:0005794);; Cellular Component: cytosol (GO:0005829);; Cellular Component: plasma membrane (GO:0005886);; Biological Process: negative regulation of protein kinase activity (GO:0006469)…	K14497|2e-28|pop:POPTR_172527|hypothetical protein	Protein phosphatase 2C 37 OS=Arabidopsis thaliana GN=PP2CA PE=1 SV=1	hypothetical protein PRUPE_ppa026727mg, partial [Prunus persica]

## Sheet: GO0009269
GO ID	Gene ID	FDR	log2FC	regulated	COG_class	COG_class_annotation	GO_annotation	KEGG_annotation	Swissprot_annotation	nr_annotation
GO:0009269	gi_351617896_gb_JP472197.1	0.00475657	-4.8515	down	--	--	Biological Process: respiratory burst involved in defense response (GO:0002679);; Molecular Function: peroxidase activity (GO:0004601);; Cellular Component: nucleus (GO:0005634);; Cellular Component: endoplasmic reticulum (GO:0005783);; Cellular Component: Golgi apparatus (GO:0005794);; Cellular Component: plasma membrane (GO:0005886);; Biological Process: protein targeting to membrane (GO:000661…	--	Peroxidase 3 OS=Arabidopsis thaliana GN=PER3 PE=2 SV=1	hypothetical protein PRUPE_ppa024711mg [Prunus persica]
GO:0009269	gi_351600324_gb_JP454795.1	7.28e-06	-4.30979	down	--	--	Biological Process: defense response to nematode (GO:0002215);; Biological Process: respiratory burst involved in defense response (GO:0002679);; Molecular Function: peroxidase activity (GO:0004601);; Cellular Component: extracellular region (GO:0005576);; Cellular Component: nucleus (GO:0005634);; Cellular Component: vacuolar membrane (GO:0005774);; Cellular Component: Golgi apparatus (GO:000579…	K00430|1e-156|vvi:100262330|hypothetical protein LOC100262330	Peroxidase 27 OS=Arabidopsis thaliana GN=PER27 PE=1 SV=1
GO:0009269	gi_351616700_gb_JP471001.1	6.19e-08	-2.48875	down	--	--	Cellular Component: vacuolar membrane (GO:0005774);; Cellular Component: plasma membrane (GO:0005886);; Biological Process: protein targeting to membrane (GO:0006612);; Biological Process: response to desiccation (GO:0009269);; Biological Process: response to cold (GO:0009409);; Cellular Component: chloroplast thylakoid membrane (GO:0009535);; Cellular Component: chloroplast stroma (GO:0009570);;…	--	Allene oxide cyclase 4, chloroplastic OS=Arabidopsis thaliana GN=AOC4 PE=2 SV=1	PREDICTED: allene oxide cyclase 4, chloroplastic-like [Fragaria vesca subsp. vesca]
GO:0009269	gi_351613177_gb_JP467478.1	3.41e-08	-2.08474	down	--	--	Biological Process: respiratory burst involved in defense response (GO:0002679);; Molecular Function: peroxidase activity (GO:0004601);; Cellular Component: extracellular region (GO:0005576);; Cellular Component: nucleus (GO:0005634);; Cellular Component: endoplasmic reticulum (GO:0005783);; Biological Process: protein targeting to membrane (GO:0006612);; Biological Process: iron ion transport (G…	K00430|1e-161|pop:POPTR_718485|hypothetical protein	Peroxidase 3 OS=Arabidopsis thaliana GN=PER3 PE=2 SV=1	hypothetical protein PRUPE_ppa008540mg [Prunus persica]
GO:0009269	gi_351590887_gb_JP449345.1	0.00158418	-1.9778	down	--	--	Molecular Function: peroxidase activity (GO:0004601);; Cellular Component: vacuole (GO:0005773);; Cellular Component: vacuolar membrane (GO:0005774);; Cellular Component: Golgi apparatus (GO:0005794);; Biological Process: ion transport (GO:0006811);; Biological Process: response to oxidative stress (GO:0006979);; Biological Process: response to desiccation (GO:0009269);; Biological Process: respo…	K00430|1e-157|pop:POPTR_830144|hypothetical protein	Peroxidase 12 OS=Arabidopsis thaliana GN=PER12 PE=1 SV=1	hypothetical protein PRUPE_ppa007748mg [Prunus persica]
GO:0009269	gi_351597655_gb_JP452197.1	8.99e-06	-1.89647	down	--	--	Biological Process: defense response to nematode (GO:0002215);; Biological Process: respiratory burst involved in defense response (GO:0002679);; Molecular Function: peroxidase activity (GO:0004601);; Cellular Component: extracellular region (GO:0005576);; Cellular Component: nucleus (GO:0005634);; Cellular Component: vacuolar membrane (GO:0005774);; Cellular Component: endoplasmic reticulum (GO:…	--	Peroxidase 5 OS=Vitis vinifera GN=GSVIVT00037159001 PE=1 SV=2	PREDICTED: peroxidase 5-like [Fragaria vesca subsp. vesca]
GO:0009269	gi_351613346_gb_JP467647.1	5.19e-11	-1.7576	down	--	--	Biological Process: immune system process (GO:0002376);; Molecular Function: peroxidase activity (GO:0004601);; Molecular Function: protein binding (GO:0005515);; Cellular Component: nucleus (GO:0005634);; Biological Process: iron ion transport (GO:0006826);; Biological Process: response to oxidative stress (GO:0006979);; Biological Process: response to desiccation (GO:0009269);; Biological Proce…	--	Peroxidase 64 OS=Arabidopsis thaliana GN=PER64 PE=1 SV=1
GO:0009269	gi_351606900_gb_JP461225.1	3.9e-12	-1.61423	down	[G]	Carbohydrate transport and metabolism	Cellular Component: protein storage vacuole (GO:0000326);; Cellular Component: plasma membrane (GO:0005886);; Biological Process: glycolysis (GO:0006096);; Biological Process: polyamine catabolic process (GO:0006598);; Biological Process: calcium ion transport (GO:0006816);; Biological Process: iron ion transport (GO:0006826);; Biological Process: water transport (GO:0006833);; Biological Process…	--	Probable aquaporin TIP2-2 OS=Arabidopsis thaliana GN=TIP2-2 PE=1 SV=2	PREDICTED: aquaporin TIP2-3-like [Fragaria vesca subsp. vesca]
GO:0009269	gi_351597300_gb_JP451848.1	2.75e-08	-1.48469	down	--	--	Biological Process: MAPK cascade (GO:0000165);; Molecular Function: phosphatidylinositol phospholipase C activity (GO:0004435);; Molecular Function: phospholipase C activity (GO:0004629);; Molecular Function: signal transducer activity (GO:0004871);; Molecular Function: binding (GO:0005488);; Molecular Function: calcium ion binding (GO:0005509);; Cellular Component: cytoplasm (GO:0005737);; Cellu…	K05857|0.0|vvi:100255373|hypothetical protein LOC100255373	Phosphoinositide phospholipase C 4 OS=Arabidopsis thaliana GN=PLC4 PE=2 SV=2	Phosphatidylinositol-speciwc phospholipase C4 [Theobroma cacao]
GO:0009269	gi_351620398_gb_JP474699.1	6.55e-08	-1.48295	down	[K]	Transcription	Molecular Function: transcription regulatory region sequence-specific DNA binding (GO:0000976);; Molecular Function: sequence-specific DNA binding transcription factor activity (GO:0003700);; Cellular Component: nucleus (GO:0005634);; Biological Process: regulation of transcription, DNA-dependent (GO:0006355);; Biological Process: response to desiccation (GO:0009269);; Biological Process: respons…	--	Homeobox-leucine zipper protein ATHB-13 OS=Arabidopsis thaliana GN=ATHB-13 PE=2 SV=2	HD domain class transcription factor [Theobroma cacao]
GO:0009269	gi_351605557_gb_JP459901.1	9.17e-06	-1.4027	down	--	--	Biological Process: maltose metabolic process (GO:0000023);; Biological Process: sulfur amino acid metabolic process (GO:0000096);; Molecular Function: iron ion binding (GO:0005506);; Molecular Function: protein binding (GO:0005515);; Cellular Component: plasma membrane (GO:0005886);; Biological Process: glycine catabolic process (GO:0006546);; Biological Process: unsaturated fatty acid biosynthe…	--	Linoleate 13S-lipoxygenase 2-1, chloroplastic OS=Solanum tuberosum GN=LOX2.1 PE=1 SV=1	lipoxygenase [Camellia sinensis]
GO:0009269	gi_351619706_gb_JP474007.1	2.35e-05	-1.30813	down	--	--	Cellular Component: extracellular region (GO:0005576);; Cellular Component: endosome (GO:0005768);; Cellular Component: Golgi apparatus (GO:0005794);; Cellular Component: trans-Golgi network (GO:0005802);; Biological Process: response to stress (GO:0006950);; Biological Process: response to desiccation (GO:0009269);; Biological Process: response to cold (GO:0009409);; Biological Process: response…	--	Dehydration-responsive protein RD22 OS=Arabidopsis thaliana GN=RD22 PE=2 SV=1	RD22-like protein precursor [Vitis vinifera]
GO:0009269	gi_351603236_gb_JP457595.1	9.69e-05	#NAME?	down	--	--	Biological Process: respiratory burst involved in defense response (GO:0002679);; Molecular Function: peroxidase activity (GO:0004601);; Cellular Component: nucleus (GO:0005634);; Cellular Component: endoplasmic reticulum (GO:0005783);; Cellular Component: Golgi apparatus (GO:0005794);; Cellular Component: plasma membrane (GO:0005886);; Biological Process: protein targeting to membrane (GO:000661…	--	Peroxidase 3 OS=Arabidopsis thaliana GN=PER3 PE=2 SV=1	hypothetical protein PRUPE_ppa024711mg [Prunus persica]
GO:0009269	gi_351613442_gb_JP467743.1	0.00152433	1.02432	up	--	--	Cellular Component: cytosol (GO:0005829);; Cellular Component: plasma membrane (GO:0005886);; Biological Process: response to desiccation (GO:0009269);; Biological Process: response to cold (GO:0009409);; Biological Process: response to wounding (GO:0009611);; Biological Process: response to high light intensity (GO:0009644);; Biological Process: response to abscisic acid stimulus (GO:0009737);; …	--	Late embryogenesis abundant protein Lea14-A OS=Gossypium hirsutum GN=LEA14-A PE=2 SV=1	unknown [Lotus japonicus]
GO:0009269	gi_351624708_gb_JP479009.1	0.000282039	1.21362	up	[E]	Amino acid transport and metabolism	Molecular Function: glutamate 5-kinase activity (GO:0004349);; Molecular Function: glutamate-5-semialdehyde dehydrogenase activity (GO:0004350);; Molecular Function: ATP binding (GO:0005524);; Cellular Component: mitochondrial inner membrane (GO:0005743);; Cellular Component: cytosol (GO:0005829);; Biological Process: glutamate metabolic process (GO:0006536);; Biological Process: proline biosynth…	K12657|0.0|rcu:RCOM_1482350|delta 1-pyrroline-5-carboxylate synthetase, putative (EC:2.7.2.11 1.2.1.41)	Delta-1-pyrroline-5-carboxylate synthase OS=Actinidia deliciosa PE=2 SV=1	delta-1-pyrroline-5-carboxylate synthetase [Boehmeria nivea]
GO:0009269	gi_351615003_gb_JP469304.1	0.00143909	1.3885	up	[K]	Transcription	Molecular Function: transcription regulatory region sequence-specific DNA binding (GO:0000976);; Molecular Function: sequence-specific DNA binding transcription factor activity (GO:0003700);; Cellular Component: nucleus (GO:0005634);; Biological Process: transcription, DNA-dependent (GO:0006351);; Biological Process: response to desiccation (GO:0009269);; Biological Process: response to cold (GO:…	--	Homeobox-leucine zipper protein ATHB-12 OS=Arabidopsis thaliana GN=ATHB-12 PE=2 SV=1	PREDICTED: homeobox-leucine zipper protein ATHB-7-like [Fragaria vesca subsp. vesca]
GO:0009269	gi_351627821_gb_JP480704.1	0.000667734	1.48448	up	--	--	Cellular Component: nucleus (GO:0005634);; Cellular Component: endosome (GO:0005768);; Cellular Component: vacuolar membrane (GO:0005774);; Cellular Component: Golgi apparatus (GO:0005794);; Cellular Component: trans-Golgi network (GO:0005802);; Molecular Function: methyltransferase activity (GO:0008168);; Molecular Function: S-adenosylmethionine-dependent methyltransferase activity (GO:0008757);…	--	Probable methyltransferase PMT18 OS=Arabidopsis thaliana GN=At1g33170 PE=2 SV=1	ATP binding protein, putative [Ricinus communis]
GO:0009269	gi_351610521_gb_JP464822.1	0.00326298	1.58144	up	--	--	Molecular Function: transcription regulatory region sequence-specific DNA binding (GO:0000976);; Molecular Function: sequence-specific DNA binding transcription factor activity (GO:0003700);; Cellular Component: nucleus (GO:0005634);; Biological Process: response to desiccation (GO:0009269);; Biological Process: response to cold (GO:0009409);; Biological Process: response to water deprivation (GO…	--	Homeobox-leucine zipper protein ATHB-7 OS=Arabidopsis thaliana GN=ATHB-7 PE=2 SV=2	homeobox leucine zipper [Rosa rugosa]
GO:0009269	gi_351596930_gb_JP451483.1	1.14e-08	1.64952	up	[P]	Inorganic ion transport and metabolism	Biological Process: transition metal ion transport (GO:0000041);; Molecular Function: peroxidase activity (GO:0004601);; Molecular Function: protein binding (GO:0005515);; Cellular Component: extracellular region (GO:0005576);; Cellular Component: nucleus (GO:0005634);; Cellular Component: vacuole (GO:0005773);; Cellular Component: cytosol (GO:0005829);; Biological Process: polyamine catabolic pr…	K00430|1e-178|rcu:RCOM_1176840|Peroxidase 47 precursor, putative (EC:1.11.1.7)	Peroxidase 47 OS=Arabidopsis thaliana GN=PER47 PE=2 SV=2	Peroxidase 47 precursor, putative [Ricinus communis]
GO:0009269	gi_351627478_gb_JP480361.1	8.08e-07	1.65167	up	[E]	Amino acid transport and metabolism	Molecular Function: glutamate 5-kinase activity (GO:0004349);; Molecular Function: glutamate-5-semialdehyde dehydrogenase activity (GO:0004350);; Molecular Function: ATP binding (GO:0005524);; Cellular Component: cytoplasm (GO:0005737);; Cellular Component: mitochondrion (GO:0005739);; Cellular Component: cytosol (GO:0005829);; Biological Process: glutamate metabolic process (GO:0006536);; Biolog…	K12657|0.0|rcu:RCOM_1482350|delta 1-pyrroline-5-carboxylate synthetase, putative (EC:2.7.2.11 1.2.1.41)	Delta-1-pyrroline-5-carboxylate synthase OS=Actinidia deliciosa PE=2 SV=1	Pyrroline-5-carboxylate synthetase isoform 1 [Theobroma cacao]
GO:0009269	gi_351622676_gb_JP476977.1	1.58e-10	1.71012	up	[C]	Energy production and conversion	Biological Process: response to superoxide (GO:0000303);; Biological Process: retinoid metabolic process (GO:0001523);; Biological Process: eye development (GO:0001654);; Molecular Function: 3-chloroallyl aldehyde dehydrogenase activity (GO:0004028);; Molecular Function: aldehyde dehydrogenase (NAD) activity (GO:0004029);; Molecular Function: L-aminoadipate-semialdehyde dehydrogenase activity (GO…	K14085|0.0|vvi:100252622|similar to aldehyde dehydrogenase family 7 member A1	Aldehyde dehydrogenase family 7 member A1 OS=Malus domestica PE=1 SV=3	hypothetical protein PRUPE_ppa004461mg [Prunus persica]
GO:0009269	gi_351616156_gb_JP470457.1	2.3e-05	4.60486	up	--	--	Molecular Function: nucleotide binding (GO:0000166);; Molecular Function: RNA binding (GO:0003723);; Molecular Function: protein binding (GO:0005515);; Cellular Component: nucleus (GO:0005634);; Biological Process: regulation of transcription, DNA-dependent (GO:0006355);; Biological Process: defense response (GO:0006952);; Biological Process: response to osmotic stress (GO:0006970);; Biological P…	--	Glycine-rich protein 3 OS=Arabidopsis thaliana GN=GRP3 PE=1 SV=1	Uncharacterized protein TCM_003328 [Theobroma cacao]

## Sheet: GO0009414
GO ID	Gene ID	FDR	log2FC	regulated	COG_class	COG_class_annotation	GO_annotation	KEGG_annotation	Swissprot_annotation	nr_annotation
GO:0009414	gi_351612043_gb_JP466344.1	8.49e-07	1.19101	up	--	--	Cellular Component: mitochondrion (GO:0005739);; Biological Process: response to cold (GO:0009409);; Biological Process: response to water deprivation (GO:0009414);; Biological Process: response to abscisic acid stimulus (GO:0009737);; Biological Process: hyperosmotic salinity response (GO:0042538);;	--	--	hypothetical protein PRUPE_ppa015325mg [Prunus persica]
GO:0009414	gi_351599611_gb_JP454100.1	6.26e-06	-1.22018	down	[V]	Defense mechanisms	Biological Process: polysaccharide biosynthetic process (GO:0000271);; Biological Process: response to superoxide (GO:0000303);; Molecular Function: calmodulin binding (GO:0005516);; Molecular Function: ATP binding (GO:0005524);; Cellular Component: nucleus (GO:0005634);; Cellular Component: plasma membrane (GO:0005886);; Biological Process: ATP catabolic process (GO:0006200);; Biological Process…	--	ABC transporter B family member 1 OS=Arabidopsis thaliana GN=ABCB1 PE=1 SV=1	hypothetical protein PRUPE_ppa000269mg [Prunus persica]
GO:0009414	gi_351628661_gb_JP481544.1	0.000221673	-1.12992	down	[V]	Defense mechanisms	Biological Process: polysaccharide biosynthetic process (GO:0000271);; Biological Process: response to superoxide (GO:0000303);; Molecular Function: protein binding (GO:0005515);; Molecular Function: ATP binding (GO:0005524);; Cellular Component: nucleus (GO:0005634);; Cellular Component: plasma membrane (GO:0005886);; Biological Process: ATP catabolic process (GO:0006200);; Biological Process: E…	K05658|0.0|vvi:100267452|hypothetical protein LOC100267452	ABC transporter B family member 4 OS=Arabidopsis thaliana GN=ABCB4 PE=1 SV=1	hypothetical protein PRUPE_ppa000315mg [Prunus persica]
GO:0009414	gi_351604401_gb_JP458753.1	0.000919414	1.30967	up	[V]	Defense mechanisms	Molecular Function: ATP binding (GO:0005524);; Cellular Component: endosome (GO:0005768);; Cellular Component: Golgi apparatus (GO:0005794);; Cellular Component: plasma membrane (GO:0005886);; Biological Process: nucleobase-containing compound metabolic process (GO:0006139);; Biological Process: ATP catabolic process (GO:0006200);; Biological Process: cholesterol metabolic process (GO:0008203);; …	--	ABC transporter G family member 25 OS=Arabidopsis thaliana GN=ABCG25 PE=2 SV=1	ATP-binding casette family G25 [Theobroma cacao]
GO:0009414	gi_351619498_gb_JP473799.1	0.000247626	-1.15105	down	[G]	Carbohydrate transport and metabolism	Biological Process: response to singlet oxygen (GO:0000304);; Molecular Function: alpha,alpha-trehalose-phosphate synthase (UDP-forming) activity (GO:0003825);; Molecular Function: trehalose-phosphatase activity (GO:0004805);; Cellular Component: cytoplasm (GO:0005737);; Biological Process: trehalose biosynthetic process (GO:0005992);; Biological Process: trehalose catabolic process (GO:0005993);…	K00697|0.0|rcu:RCOM_1253000|trehalose-6-phosphate synthase, putative (EC:2.4.1.15 3.1.3.12)	Alpha,alpha-trehalose-phosphate synthase [UDP-forming] 1 OS=Arabidopsis thaliana GN=TPS1 PE=1 SV=1	PREDICTED: alpha,alpha-trehalose-phosphate synthase [UDP-forming] 1-like [Fragaria vesca subsp. vesca]
GO:0009414	gi_351628462_gb_JP481345.1	0.00242919	-1.26914	down	[G]	Carbohydrate transport and metabolism	Cellular Component: cytosol (GO:0005829);; Biological Process: glycogen catabolic process (GO:0005980);; Biological Process: glucose metabolic process (GO:0006006);; Molecular Function: glycogen phosphorylase activity (GO:0008184);; Biological Process: response to cold (GO:0009409);; Biological Process: response to water deprivation (GO:0009414);; Cellular Component: chloroplast (GO:0009507);; Ce…	K00688|0.0|rcu:RCOM_0730590|glycogen phosphorylase, putative (EC:2.4.1.1)	Alpha-glucan phosphorylase, H isozyme OS=Vicia faba PE=1 SV=1	hypothetical protein PRUPE_ppa001354mg [Prunus persica]
GO:0009414	gi_351628057_gb_JP480940.1	0.00314755	-1.39114	down	--	--	Molecular Function: calcium ion binding (GO:0005509);; Molecular Function: calcium-dependent phospholipid binding (GO:0005544);; Cellular Component: nuclear envelope (GO:0005635);; Cellular Component: nucleoplasm (GO:0005654);; Cellular Component: endoplasmic reticulum membrane (GO:0005789);; Cellular Component: spindle (GO:0005819);; Cellular Component: cytosol (GO:0005829);; Cellular Component:…	--	Annexin D5 OS=Arabidopsis thaliana GN=ANN5 PE=2 SV=2	Annexin 5 isoform 1 [Theobroma cacao]
GO:0009414	gi_351591607_gb_JP450053.1	0.00540468	1.14763	up	--	--	Molecular Function: calcium ion binding (GO:0005509);; Molecular Function: calcium-dependent phospholipid binding (GO:0005544);; Cellular Component: nuclear envelope (GO:0005635);; Cellular Component: nucleoplasm (GO:0005654);; Cellular Component: spindle (GO:0005819);; Cellular Component: cytosol (GO:0005829);; Biological Process: steroid biosynthetic process (GO:0006694);; Biological Process: p…	--	Annexin D5 OS=Arabidopsis thaliana GN=ANN5 PE=2 SV=2	PREDICTED: annexin D5 [Vitis vinifera]
GO:0009414	gi_351612717_gb_JP467018.1	6.44e-06	-1.10647	down	--	--	Cellular Component: nucleus (GO:0005634);; Biological Process: regulation of translation (GO:0006417);; Biological Process: response to osmotic stress (GO:0006970);; Biological Process: response to water deprivation (GO:0009414);; Cellular Component: plasmodesma (GO:0009506);; Biological Process: response to external stimulus (GO:0009605);; Biological Process: response to auxin stimulus (GO:00097…	--	Auxin-responsive protein IAA26 OS=Arabidopsis thaliana GN=IAA26 PE=1 SV=2	hypothetical protein PRUPE_ppa007663mg [Prunus persica]
GO:0009414	gi_351597145_gb_JP451695.1	7.24e-05	-1.25021	down	--	--	Molecular Function: protein binding (GO:0005515);; Biological Process: carbohydrate metabolic process (GO:0005975);; Biological Process: response to osmotic stress (GO:0006970);; Biological Process: response to water deprivation (GO:0009414);; Biological Process: response to external stimulus (GO:0009605);; Biological Process: response to auxin stimulus (GO:0009733);; Biological Process: response…	--	Auxin-responsive protein IAA3 OS=Arabidopsis thaliana GN=IAA3 PE=1 SV=1	hypothetical protein PRUPE_ppa018535mg [Prunus persica]
GO:0009414	gi_351614719_gb_JP469020.1	0.00123941	-2.85998	down	[S]	Function unknown	Biological Process: MAPK cascade (GO:0000165);; Cellular Component: extracellular region (GO:0005576);; Cellular Component: cell wall (GO:0005618);; Biological Process: protein targeting to membrane (GO:0006612);; Biological Process: response to water deprivation (GO:0009414);; Biological Process: detection of biotic stimulus (GO:0009595);; Biological Process: salicylic acid biosynthetic process …	--	Basic form of pathogenesis-related protein 1 OS=Nicotiana tabacum PE=3 SV=1	hypothetical protein PRUPE_ppa020367mg, partial [Prunus persica]
GO:0009414	gi_351618243_gb_JP472544.1	0.00256439	-1.05426	down	--	--	Molecular Function: sequence-specific DNA binding transcription factor activity (GO:0003700);; Molecular Function: binding (GO:0005488);; Cellular Component: nucleus (GO:0005634);; Biological Process: regulation of transcription, DNA-dependent (GO:0006355);; Biological Process: response to water deprivation (GO:0009414);; Biological Process: response to abscisic acid stimulus (GO:0009737);; Biolo…	--	BES1/BZR1 homolog protein 4 OS=Arabidopsis thaliana GN=BEH4 PE=1 SV=1	BES1/BZR1 [Theobroma cacao]
GO:0009414	gi_351599644_gb_JP454133.1	3.47e-09	1.36176	up	--	--	Biological Process: polysaccharide biosynthetic process (GO:0000271);; Molecular Function: sequence-specific DNA binding transcription factor activity (GO:0003700);; Molecular Function: protein serine/threonine kinase activity (GO:0004674);; Molecular Function: ATP binding (GO:0005524);; Cellular Component: nucleus (GO:0005634);; Cellular Component: cytosol (GO:0005829);; Cellular Component: plas…	--	Beta-amylase 1, chloroplastic OS=Arabidopsis thaliana GN=BAM1 PE=1 SV=1	PREDICTED: beta-amylase 1, chloroplastic-like [Cucumis sativus]
GO:0009414	gi_351618335_gb_JP472636.1	4.94e-05	1.37552	up	--	--	Biological Process: polysaccharide biosynthetic process (GO:0000271);; Molecular Function: sequence-specific DNA binding transcription factor activity (GO:0003700);; Molecular Function: protein serine/threonine kinase activity (GO:0004674);; Molecular Function: ATP binding (GO:0005524);; Cellular Component: nucleus (GO:0005634);; Cellular Component: cytosol (GO:0005829);; Cellular Component: plas…	--	Beta-amylase 1, chloroplastic OS=Arabidopsis thaliana GN=BAM1 PE=1 SV=1	PREDICTED: beta-amylase 1, chloroplastic-like [Cucumis sativus]
GO:0009414	gi_351624851_gb_JP479152.1	0.00970878	2.46959	up	--	--	Biological Process: polysaccharide biosynthetic process (GO:0000271);; Molecular Function: sequence-specific DNA binding transcription factor activity (GO:0003700);; Molecular Function: protein serine/threonine kinase activity (GO:0004674);; Molecular Function: ATP binding (GO:0005524);; Cellular Component: nucleus (GO:0005634);; Cellular Component: cytosol (GO:0005829);; Cellular Component: plas…	--	Beta-amylase 1, chloroplastic OS=Arabidopsis thaliana GN=BAM1 PE=1 SV=1	Beta-amylase, putative [Ricinus communis]
GO:0009414	gi_351620761_gb_JP475062.1	0.00661108	-1.44914	down	--	--	Biological Process: polysaccharide biosynthetic process (GO:0000271);; Biological Process: polysaccharide catabolic process (GO:0000272);; Molecular Function: sequence-specific DNA binding transcription factor activity (GO:0003700);; Molecular Function: alpha-amylase activity (GO:0004556);; Molecular Function: calcium ion binding (GO:0005509);; Cellular Component: extracellular region (GO:0005576…	--	Beta-amylase OS=Trifolium repens GN=BMY1 PE=2 SV=1	PREDICTED: beta-amylase-like [Fragaria vesca subsp. vesca]
GO:0009414	gi_351608298_gb_JP462606.1	0.00019346	#NAME?	down	--	--	Biological Process: polysaccharide biosynthetic process (GO:0000271);; Molecular Function: calcium-dependent protein serine/threonine phosphatase activity (GO:0004723);; Molecular Function: calcium ion binding (GO:0005509);; Biological Process: detection of calcium ion (GO:0005513);; Molecular Function: protein binding (GO:0005515);; Cellular Component: cytoplasm (GO:0005737);; Cellular Component…	--	Calcineurin B-like protein 4 OS=Arabidopsis thaliana GN=CBL4 PE=1 SV=3	PREDICTED: calcineurin B-like protein 4-like [Fragaria vesca subsp. vesca]
GO:0009414	gi_351600024_gb_JP454501.1	1.49e-08	1.80634	up	[RTKL]	--	Biological Process: MAPK cascade (GO:0000165);; Molecular Function: calmodulin-dependent protein kinase activity (GO:0004683);; Molecular Function: calcium ion binding (GO:0005509);; Molecular Function: protein binding (GO:0005515);; Molecular Function: ATP binding (GO:0005524);; Cellular Component: nucleus (GO:0005634);; Cellular Component: vacuole (GO:0005773);; Cellular Component: peroxisome (…	K13412|0.0|rcu:RCOM_0422070|calcium-dependent protein kinase, putative (EC:2.7.11.17)	Calcium-dependent protein kinase 1 OS=Arabidopsis thaliana GN=CPK1 PE=1 SV=1	hypothetical protein PRUPE_ppa002734mg [Prunus persica]
GO:0009414	gi_351627543_gb_JP480426.1	0.00285243	-2.63507	down	[RTKL]	--	Biological Process: MAPK cascade (GO:0000165);; Molecular Function: calmodulin-dependent protein kinase activity (GO:0004683);; Molecular Function: calcium-dependent protein kinase C activity (GO:0004698);; Molecular Function: calcium ion binding (GO:0005509);; Molecular Function: protein binding (GO:0005515);; Molecular Function: ATP binding (GO:0005524);; Cellular Component: nucleus (GO:0005634…	K13412|0.0|vvi:100250838|hypothetical protein LOC100250838	Calcium-dependent protein kinase 24 OS=Arabidopsis thaliana GN=CPK24 PE=2 SV=1	unnamed protein product [Vitis vinifera]
GO:0009414	gi_351602874_gb_JP457235.1	3.37e-05	-1.76409	down	[M]	Cell wall/membrane/envelope biogenesis	Biological Process: cell morphogenesis (GO:0000902);; Cellular Component: cell wall (GO:0005618);; Cellular Component: endosome (GO:0005768);; Cellular Component: Golgi apparatus (GO:0005794);; Cellular Component: trans-Golgi network (GO:0005802);; Cellular Component: plasma membrane (GO:0005886);; Biological Process: glycolysis (GO:0006096);; Biological Process: calcium ion transport (GO:0006816…	K10999|0.0|vvi:100241197|hypothetical protein LOC100241197	Cellulose synthase A catalytic subunit 4 [UDP-forming] OS=Arabidopsis thaliana GN=CESA4 PE=1 SV=1	PREDICTED: cellulose synthase A catalytic subunit 4 [UDP-forming]-like [Cicer arietinum]
GO:0009414	gi_351597510_gb_JP452055.1	1.71e-07	-1.74895	down	[M]	Cell wall/membrane/envelope biogenesis	Biological Process: cell morphogenesis (GO:0000902);; Cellular Component: cell wall (GO:0005618);; Cellular Component: endosome (GO:0005768);; Cellular Component: Golgi apparatus (GO:0005794);; Cellular Component: trans-Golgi network (GO:0005802);; Cellular Component: plasma membrane (GO:0005886);; Biological Process: glycolysis (GO:0006096);; Biological Process: calcium ion transport (GO:0006816…	K10999|0.0|vvi:100261696|hypothetical protein LOC100261696	Cellulose synthase A catalytic subunit 8 [UDP-forming] OS=Arabidopsis thaliana GN=CESA8 PE=1 SV=1	hypothetical protein PRUPE_ppa024725mg [Prunus persica]
GO:0009414	gi_351613568_gb_JP467869.1	0.00564749	4.06941	up	--	--	Biological Process: microtubule cytoskeleton organization (GO:0000226);; Biological Process: double-strand break repair via homologous recombination (GO:0000724);; Biological Process: cell morphogenesis (GO:0000902);; Biological Process: cytokinesis by cell plate formation (GO:0000911);; Cellular Component: cell wall (GO:0005618);; Cellular Component: endosome (GO:0005768);; Cellular Component: e…	--	Cellulose synthase-like protein D3 OS=Arabidopsis thaliana GN=CSLD3 PE=1 SV=1	hypothetical protein VITISV_042740 [Vitis vinifera]
GO:0009414	gi_351607554_gb_JP461874.1	2.94e-16	2.03956	up	--	--	Cellular Component: nucleus (GO:0005634);; Biological Process: protein folding (GO:0006457);; Biological Process: response to heat (GO:0009408);; Biological Process: response to water deprivation (GO:0009414);; Biological Process: response to high light intensity (GO:0009644);; Biological Process: response to salt stress (GO:0009651);; Biological Process: abscisic acid mediated signaling pathway …	--	EID1-like F-box protein 3 OS=Arabidopsis thaliana GN=EDL3 PE=2 SV=1	PREDICTED: EID1-like F-box protein 3-like [Vitis vinifera]
GO:0009414	gi_351595629_gb_JP450195.1	0.00223671	1.36182	up	--	--	Biological Process: respiratory burst involved in defense response (GO:0002679);; Molecular Function: DNA binding (GO:0003677);; Molecular Function: sequence-specific DNA binding transcription factor activity (GO:0003700);; Cellular Component: nucleus (GO:0005634);; Cellular Component: nucleolus (GO:0005730);; Biological Process: response to cold (GO:0009409);; Biological Process: response to wat…	--	Ethylene-responsive transcription factor CRF2 OS=Arabidopsis thaliana GN=CRF2 PE=1 SV=1	hypothetical protein PRUPE_ppa025804mg [Prunus persica]
GO:0009414	gi_351629183_gb_JP482066.1	0.00403319	1.77015	up	--	--	Molecular Function: sequence-specific DNA binding transcription factor activity (GO:0003700);; Molecular Function: protein binding (GO:0005515);; Cellular Component: nucleus (GO:0005634);; Biological Process: regulation of transcription, DNA-dependent (GO:0006355);; Biological Process: defense response (GO:0006952);; Biological Process: response to osmotic stress (GO:0006970);; Biological Process…	--	Ethylene-responsive transcription factor CRF4 OS=Arabidopsis thaliana GN=CRF4 PE=1 SV=2	Ethylene-responsive transcription factor, putative [Theobroma cacao]
GO:0009414	gi_351619283_gb_JP473584.1	1.32e-08	2.01051	up	--	--	Cellular Component: nucleus (GO:0005634);; Biological Process: galactose metabolic process (GO:0006012);; Biological Process: response to heat (GO:0009408);; Biological Process: response to cold (GO:0009409);; Biological Process: response to water deprivation (GO:0009414);; Biological Process: response to high light intensity (GO:0009644);; Biological Process: response to salt stress (GO:0009651)…	--	Galactinol synthase 1 OS=Arabidopsis thaliana GN=GOLS1 PE=1 SV=1	PREDICTED: glycogenin-2-like [Glycine max]
GO:0009414	gi_351608234_gb_JP462544.1	8.83e-07	1.33591	up	--	--	Biological Process: MAPK cascade (GO:0000165);; Molecular Function: protein binding (GO:0005515);; Cellular Component: cytoplasm (GO:0005737);; Biological Process: regulation of transcription, DNA-dependent (GO:0006355);; Biological Process: protein targeting to membrane (GO:0006612);; Molecular Function: electron carrier activity (GO:0009055);; Biological Process: response to cold (GO:0009409);;…	--	Glutaredoxin-C9 OS=Arabidopsis thaliana GN=GRXC9 PE=1 SV=1	Glutaredoxin-C9 [Medicago truncatula]
GO:0009414	gi_351616156_gb_JP470457.1	2.3e-05	4.60486	up	--	--	Molecular Function: nucleotide binding (GO:0000166);; Molecular Function: RNA binding (GO:0003723);; Molecular Function: protein binding (GO:0005515);; Cellular Component: nucleus (GO:0005634);; Biological Process: regulation of transcription, DNA-dependent (GO:0006355);; Biological Process: defense response (GO:0006952);; Biological Process: response to osmotic stress (GO:0006970);; Biological P…	--	Glycine-rich protein 3 OS=Arabidopsis thaliana GN=GRP3 PE=1 SV=1	Uncharacterized protein TCM_003328 [Theobroma cacao]
GO:0009414	gi_351599305_gb_JP453802.1	1.31e-05	1.07977	up	[O]	Posttranslational modification, protein turnover, chaperones	Cellular Component: Prp19 complex (GO:0000974);; Molecular Function: protease binding (GO:0002020);; Molecular Function: receptor activity (GO:0004872);; Molecular Function: KDEL sequence binding (GO:0005046);; Molecular Function: receptor binding (GO:0005102);; Molecular Function: ATP binding (GO:0005524);; Cellular Component: cell wall (GO:0005618);; Cellular Component: spliceosomal complex (GO…	K03283|0.0|rcu:RCOM_1442280|heat shock protein, putative (EC:1.3.1.74)	Heat shock 70 kDa protein OS=Glycine max GN=HSP70 PE=1 SV=1	hypothetical protein PRUPE_ppa002595mg [Prunus persica]
GO:0009414	gi_351625728_gb_JP480029.1	9.05e-08	1.33243	up	[O]	Posttranslational modification, protein turnover, chaperones	Cellular Component: Prp19 complex (GO:0000974);; Molecular Function: protease binding (GO:0002020);; Molecular Function: receptor activity (GO:0004872);; Molecular Function: KDEL sequence binding (GO:0005046);; Molecular Function: receptor binding (GO:0005102);; Molecular Function: ATP binding (GO:0005524);; Cellular Component: cell wall (GO:0005618);; Cellular Component: spliceosomal complex (GO…	K03283|0.0|rcu:RCOM_1442280|heat shock protein, putative (EC:1.3.1.74)	Heat shock 70 kDa protein OS=Glycine max GN=HSP70 PE=1 SV=1	PREDICTED: heat shock 70 kDa protein-like [Fragaria vesca subsp. vesca]
GO:0009414	gi_351624577_gb_JP478878.1	4.1e-16	1.96301	up	[O]	Posttranslational modification, protein turnover, chaperones	Biological Process: G2/M transition of mitotic cell cycle (GO:0000086);; Molecular Function: ATP binding (GO:0005524);; Cellular Component: cell wall (GO:0005618);; Cellular Component: nucleolus (GO:0005730);; Cellular Component: mitochondrion (GO:0005739);; Cellular Component: vacuolar membrane (GO:0005774);; Cellular Component: Golgi apparatus (GO:0005794);; Cellular Component: cytosol (GO:0005…	K04079|0.0|pop:POPTR_592912|hypothetical protein	Heat shock protein 83 OS=Ipomoea nil GN=HSP83A PE=2 SV=1	predicted protein [Populus trichocarpa]
GO:0009414	gi_351613906_gb_JP468207.1	0.00041462	-1.17358	down	[B]	Chromatin structure and dynamics	Cellular Component: nucleosome (GO:0000786);; Molecular Function: DNA binding (GO:0003677);; Cellular Component: nucleolus (GO:0005730);; Cellular Component: mitochondrion (GO:0005739);; Cellular Component: vacuolar membrane (GO:0005774);; Cellular Component: Golgi apparatus (GO:0005794);; Cellular Component: cytosol (GO:0005829);; Cellular Component: plasma membrane (GO:0005886);; Biological Pro…	K11254|1e-50|ppp:PHYPADRAFT_152862|HFO1503	Histone H4 OS=Glycine max PE=3 SV=1	hypothetical protein CARUB_v10018191mg [Capsella rubella]
GO:0009414	gi_351612830_gb_JP467131.1	2.96e-09	1.49743	up	--	--	Molecular Function: DNA binding (GO:0003677);; Cellular Component: nucleus (GO:0005634);; Biological Process: response to water deprivation (GO:0009414);; Biological Process: response to virus (GO:0009615);; Biological Process: response to salt stress (GO:0009651);; Biological Process: response to abscisic acid stimulus (GO:0009737);; Biological Process: positive regulation of transcription, DNA-…	--	Homeobox-leucine zipper protein ATHB-12 OS=Arabidopsis thaliana GN=ATHB-12 PE=2 SV=1	predicted protein [Populus trichocarpa]
GO:0009414	gi_351611952_gb_JP466253.1	0.00326306	-3.8409	down	[K]	Transcription	Molecular Function: sequence-specific DNA binding transcription factor activity (GO:0003700);; Cellular Component: nucleus (GO:0005634);; Biological Process: response to water deprivation (GO:0009414);; Cellular Component: plastid (GO:0009536);; Biological Process: response to virus (GO:0009615);; Biological Process: gravitropism (GO:0009630);; Biological Process: response to blue light (GO:00096…	--	Homeobox-leucine zipper protein ATHB-16 OS=Arabidopsis thaliana GN=ATHB-16 PE=2 SV=2	hypothetical protein PRUPE_ppa009419mg [Prunus persica]
GO:0009414	gi_351610521_gb_JP464822.1	0.00326298	1.58144	up	--	--	Molecular Function: transcription regulatory region sequence-specific DNA binding (GO:0000976);; Molecular Function: sequence-specific DNA binding transcription factor activity (GO:0003700);; Cellular Component: nucleus (GO:0005634);; Biological Process: response to desiccation (GO:0009269);; Biological Process: response to cold (GO:0009409);; Biological Process: response to water deprivation (GO…	--	Homeobox-leucine zipper protein ATHB-7 OS=Arabidopsis thaliana GN=ATHB-7 PE=2 SV=2	homeobox leucine zipper [Rosa rugosa]
GO:0009414	gi_351604297_gb_JP458650.1	6.64e-05	-2.00592	down	[Q]	Secondary metabolites biosynthesis, transport and catabolism	Molecular Function: copper ion binding (GO:0005507);; Cellular Component: mitochondrion (GO:0005739);; Molecular Function: L-ascorbate oxidase activity (GO:0008447);; Biological Process: response to water deprivation (GO:0009414);; Biological Process: lignin biosynthetic process (GO:0009809);; Biological Process: plant-type cell wall biogenesis (GO:0009832);; Biological Process: glucuronoxylan me…	--	Laccase-13 OS=Arabidopsis thaliana GN=LAC13 PE=2 SV=1	PREDICTED: laccase-3-like [Fragaria vesca subsp. vesca]
GO:0009414	gi_351600392_gb_JP454860.1	6.96e-05	-2.34484	down	[Q]	Secondary metabolites biosynthesis, transport and catabolism	Molecular Function: copper ion binding (GO:0005507);; Cellular Component: extracellular region (GO:0005576);; Molecular Function: L-ascorbate oxidase activity (GO:0008447);; Biological Process: response to water deprivation (GO:0009414);; Biological Process: lignin biosynthetic process (GO:0009809);; Biological Process: plant-type cell wall biogenesis (GO:0009832);; Biological Process: glucuronox…	--	Laccase-3 OS=Arabidopsis thaliana GN=LAC3 PE=2 SV=2	PREDICTED: LOW QUALITY PROTEIN: laccase-3-like [Glycine max]
GO:0009414	gi_351624981_gb_JP479282.1	0.00192802	-1.66626	down	[Q]	Secondary metabolites biosynthesis, transport and catabolism	Molecular Function: copper ion binding (GO:0005507);; Cellular Component: extracellular region (GO:0005576);; Molecular Function: L-ascorbate oxidase activity (GO:0008447);; Biological Process: response to water deprivation (GO:0009414);; Biological Process: lignin biosynthetic process (GO:0009809);; Biological Process: plant-type cell wall biogenesis (GO:0009832);; Biological Process: glucuronox…	--	Laccase-3 OS=Arabidopsis thaliana GN=LAC3 PE=2 SV=2	hypothetical protein PRUPE_ppa003408mg [Prunus persica]
GO:0009414	gi_351605968_gb_JP460306.1	0.00101966	#NAME?	down	[Q]	Secondary metabolites biosynthesis, transport and catabolism	Molecular Function: copper ion binding (GO:0005507);; Cellular Component: extracellular region (GO:0005576);; Biological Process: iron ion transport (GO:0006826);; Molecular Function: L-ascorbate oxidase activity (GO:0008447);; Biological Process: response to water deprivation (GO:0009414);; Biological Process: cellular response to iron ion starvation (GO:0010106);; Biological Process: response t…	--	Laccase-7 OS=Arabidopsis thaliana GN=LAC7 PE=2 SV=1	PREDICTED: laccase-7 [Vitis vinifera]
GO:0009414	gi_351616179_gb_JP470480.1	4.42e-08	-1.51046	down	[S]	Function unknown	Biological Process: maltose metabolic process (GO:0000023);; Biological Process: maltose biosynthetic process (GO:0000024);; Biological Process: activation of MAPKK activity (GO:0000186);; Biological Process: polysaccharide biosynthetic process (GO:0000271);; Molecular Function: protein serine/threonine kinase activity (GO:0004674);; Molecular Function: MAP kinase kinase kinase activity (GO:00047…	--	Leucine-rich repeat receptor-like serine/threonine-protein kinase BAM3 OS=Arabidopsis thaliana GN=BAM3 PE=2 SV=3	PREDICTED: leucine-rich repeat receptor-like serine/threonine-protein kinase BAM3-like [Fragaria vesca subsp. vesca]
GO:0009414	gi_351617462_gb_JP471763.1	0.00206765	-2.02662	down	[IQR]	--	Molecular Function: copper ion binding (GO:0005507);; Cellular Component: extracellular region (GO:0005576);; Cellular Component: cytosol (GO:0005829);; Cellular Component: plasma membrane (GO:0005886);; Biological Process: proline biosynthetic process (GO:0006561);; Biological Process: steroid metabolic process (GO:0008202);; Biological Process: response to heat (GO:0009408);; Biological Process…	--	Momilactone A synthase OS=Oryza sativa subsp. japonica GN=Os04g0179200 PE=2 SV=1	NAD(P)-binding Rossmann-fold superfamily protein [Theobroma cacao]
GO:0009414	gi_351614136_gb_JP468437.1	1.11e-05	-1.67111	down	[IQR]	--	Molecular Function: copper ion binding (GO:0005507);; Cellular Component: cytosol (GO:0005829);; Cellular Component: plasma membrane (GO:0005886);; Biological Process: proline biosynthetic process (GO:0006561);; Biological Process: fatty acid metabolic process (GO:0006631);; Biological Process: steroid metabolic process (GO:0008202);; Biological Process: response to heat (GO:0009408);; Biological…	--	Momilactone A synthase OS=Oryza sativa subsp. japonica GN=Os04g0179200 PE=2 SV=1	PREDICTED: momilactone A synthase-like [Glycine max]
GO:0009414	gi_351595944_gb_JP450504.1	0.000240001	-1.51336	down	[IQR]	--	Molecular Function: 3-hydroxyacyl-CoA dehydrogenase activity (GO:0003857);; Molecular Function: estradiol 17-beta-dehydrogenase activity (GO:0004303);; Molecular Function: copper ion binding (GO:0005507);; Molecular Function: protein binding (GO:0005515);; Cellular Component: mitochondrial matrix (GO:0005759);; Cellular Component: cytosol (GO:0005829);; Cellular Component: plasma membrane (GO:000…	--	Momilactone A synthase OS=Oryza sativa subsp. japonica GN=Os04g0179200 PE=2 SV=1	PREDICTED: momilactone A synthase-like [Fragaria vesca subsp. vesca]
GO:0009414	gi_351622627_gb_JP476928.1	0.00299629	-1.64751	down	[M]	Cell wall/membrane/envelope biogenesis	Cellular Component: mitochondrion (GO:0005739);; Biological Process: fatty acid metabolic process (GO:0006631);; Biological Process: response to cold (GO:0009409);; Biological Process: response to water deprivation (GO:0009414);; Biological Process: response to light stimulus (GO:0009416);; Biological Process: response to wounding (GO:0009611);; Biological Process: response to fungus (GO:0009620)…	K03715|0.0|pop:POPTR_578871|1,2-diacylglycerol 3-beta-galactosyltransferase (EC:2.4.1.46)	Monogalactosyldiacylglycerol synthase 2, chloroplastic OS=Arabidopsis thaliana GN=MGD2 PE=1 SV=1	PREDICTED: monogalactosyldiacylglycerol synthase 2, chloroplastic-like [Fragaria vesca subsp. vesca]
GO:0009414	gi_351604070_gb_JP458424.1	1.09e-05	1.17129	up	--	--	Biological Process: MAPK cascade (GO:0000165);; Biological Process: response to hypoxia (GO:0001666);; Molecular Function: DNA binding (GO:0003677);; Molecular Function: sequence-specific DNA binding transcription factor activity (GO:0003700);; Cellular Component: nucleus (GO:0005634);; Biological Process: regulation of transcription, DNA-dependent (GO:0006355);; Biological Process: protein targe…	--	NAC domain-containing protein 2 OS=Arabidopsis thaliana GN=NAC002 PE=2 SV=2	NAC family transcription factor 5 [Morella rubra]
GO:0009414	gi_351618593_gb_JP472894.1	6.33e-09	3.18248	up	--	--	Biological Process: MAPK cascade (GO:0000165);; Biological Process: response to hypoxia (GO:0001666);; Molecular Function: DNA binding (GO:0003677);; Molecular Function: sequence-specific DNA binding transcription factor activity (GO:0003700);; Cellular Component: nucleus (GO:0005634);; Biological Process: regulation of transcription, DNA-dependent (GO:0006355);; Biological Process: protein targe…	--	NAC domain-containing protein 72 OS=Arabidopsis thaliana GN=NAC072 PE=2 SV=1	NAC domain class transcription factor isoform 1 [Theobroma cacao]
GO:0009414	gi_351597144_gb_JP451694.1	0.000574046	1.75577	up	--	--	Biological Process: MAPK cascade (GO:0000165);; Biological Process: response to hypoxia (GO:0001666);; Molecular Function: sequence-specific DNA binding transcription factor activity (GO:0003700);; Cellular Component: nucleus (GO:0005634);; Biological Process: trehalose biosynthetic process (GO:0005992);; Biological Process: proline biosynthetic process (GO:0006561);; Biological Process: protein …	--	NAC transcription factor 29 OS=Arabidopsis thaliana GN=NAC029 PE=2 SV=1	hypothetical protein PRUPE_ppa009455mg [Prunus persica]
GO:0009414	gi_351599295_gb_JP453792.1	1.29e-06	-2.60726	down	[E]	Amino acid transport and metabolism	Molecular Function: protein binding (GO:0005515);; Cellular Component: Golgi apparatus (GO:0005794);; Cellular Component: plasma membrane (GO:0005886);; Biological Process: oligopeptide transport (GO:0006857);; Biological Process: intra-Golgi vesicle-mediated transport (GO:0006891);; Biological Process: response to water deprivation (GO:0009414);; Cellular Component: plasmodesma (GO:0009506);; Bi…	--	Nitrate transporter 1.1 OS=Arabidopsis thaliana GN=NRT1.1 PE=1 SV=1	nitrate transporter [Prunus persica]
GO:0009414	gi_351624285_gb_JP478586.1	4.72e-14	-2.58737	down	[E]	Amino acid transport and metabolism	Molecular Function: protein binding (GO:0005515);; Cellular Component: Golgi apparatus (GO:0005794);; Cellular Component: plasma membrane (GO:0005886);; Biological Process: oligopeptide transport (GO:0006857);; Biological Process: response to water deprivation (GO:0009414);; Cellular Component: plasmodesma (GO:0009506);; Biological Process: response to wounding (GO:0009611);; Biological Process: …	--	Nitrate transporter 1.1 OS=Arabidopsis thaliana GN=NRT1.1 PE=1 SV=1	nitrate transporter [Prunus persica]
GO:0009414	gi_351625553_gb_JP479854.1	7.63e-07	#NAME?	down	[E]	Amino acid transport and metabolism	Molecular Function: protein binding (GO:0005515);; Cellular Component: Golgi apparatus (GO:0005794);; Cellular Component: plasma membrane (GO:0005886);; Biological Process: oligopeptide transport (GO:0006857);; Biological Process: intra-Golgi vesicle-mediated transport (GO:0006891);; Biological Process: response to water deprivation (GO:0009414);; Cellular Component: plasmodesma (GO:0009506);; Bi…	--	Nitrate transporter 1.1 OS=Arabidopsis thaliana GN=NRT1.1 PE=1 SV=1	nitrate transporter [Prunus persica]
GO:0009414	gi_351605867_gb_JP460208.1	4.57e-08	-3.2829	down	[E]	Amino acid transport and metabolism	Molecular Function: transporter activity (GO:0005215);; Molecular Function: calcium ion binding (GO:0005509);; Molecular Function: protein binding (GO:0005515);; Cellular Component: Golgi apparatus (GO:0005794);; Cellular Component: plasma membrane (GO:0005886);; Biological Process: polysaccharide metabolic process (GO:0005976);; Biological Process: nitrogen compound metabolic process (GO:0006807…	--	Nitrate transporter 1.2 OS=Arabidopsis thaliana GN=NRT1.2 PE=1 SV=1	hypothetical protein PRUPE_ppa003360mg [Prunus persica]
GO:0009414	gi_351602034_gb_JP456469.1	0.00185323	-2.66949	down	[E]	Amino acid transport and metabolism	Molecular Function: transporter activity (GO:0005215);; Molecular Function: calcium ion binding (GO:0005509);; Molecular Function: protein binding (GO:0005515);; Cellular Component: Golgi apparatus (GO:0005794);; Cellular Component: plasma membrane (GO:0005886);; Biological Process: polysaccharide metabolic process (GO:0005976);; Biological Process: nitrogen compound metabolic process (GO:0006807…	--	Nitrate transporter 1.2 OS=Arabidopsis thaliana GN=NRT1.2 PE=1 SV=1	hypothetical protein PRUPE_ppa003360mg [Prunus persica]
GO:0009414	gi_351604202_gb_JP458555.1	1.14e-11	2.62431	up	[E]	Amino acid transport and metabolism	Molecular Function: transporter activity (GO:0005215);; Molecular Function: protein binding (GO:0005515);; Cellular Component: Golgi apparatus (GO:0005794);; Cellular Component: plasma membrane (GO:0005886);; Biological Process: oligopeptide transport (GO:0006857);; Biological Process: response to water deprivation (GO:0009414);; Cellular Component: plasmodesma (GO:0009506);; Biological Process: …	--	Nitrate transporter 1.4 OS=Arabidopsis thaliana GN=NRT1.4 PE=1 SV=1	Major facilitator superfamily protein isoform 2 [Theobroma cacao]
GO:0009414	gi_351611561_gb_JP465862.1	1.39e-18	3.24584	up	--	--	Cellular Component: cell wall (GO:0005618);; Biological Process: lipid transport (GO:0006869);; Biological Process: defense response (GO:0006952);; Molecular Function: lipid binding (GO:0008289);; Biological Process: response to cold (GO:0009409);; Biological Process: response to water deprivation (GO:0009414);; Biological Process: response to biotic stimulus (GO:0009607);; Biological Process: re…	--	Non-specific lipid-transfer protein OS=Gossypium hirsutum PE=2 SV=1	lipid transfer protein precursor [Vitis vinifera]
GO:0009414	gi_351611914_gb_JP466215.1	2.54e-07	-1.40768	down	--	--	Molecular Function: DNA binding (GO:0003677);; Molecular Function: sequence-specific DNA binding transcription factor activity (GO:0003700);; Molecular Function: protein binding (GO:0005515);; Cellular Component: nucleoplasm (GO:0005654);; Biological Process: transcription from RNA polymerase II promoter (GO:0006366);; Biological Process: response to water deprivation (GO:0009414);; Biological Pr…	--	Nuclear transcription factor Y subunit A-8 OS=Arabidopsis thaliana GN=NFYA8 PE=2 SV=2	hypothetical protein PRUPE_ppa016008mg [Prunus persica]
GO:0009414	gi_351621046_gb_JP475347.1	1.37e-09	1.47251	up	--	--	Molecular Function: DNA binding (GO:0003677);; Molecular Function: sequence-specific DNA binding transcription factor activity (GO:0003700);; Molecular Function: protein binding (GO:0005515);; Biological Process: regulation of transcription, DNA-dependent (GO:0006355);; Biological Process: transcription from RNA polymerase II promoter (GO:0006366);; Biological Process: response to water deprivati…	--	Nuclear transcription factor Y subunit A-9 OS=Arabidopsis thaliana GN=NFYA9 PE=2 SV=1	unnamed protein product [Vitis vinifera]
GO:0009414	gi_351606808_gb_JP461133.1	4.6e-05	-1.40304	down	[I]	Lipid transport and metabolism	Molecular Function: phospholipase D activity (GO:0004630);; Molecular Function: calcium ion binding (GO:0005509);; Molecular Function: protein binding (GO:0005515);; Molecular Function: phosphatidylinositol-4,5-bisphosphate binding (GO:0005546);; Cellular Component: plasma membrane (GO:0005886);; Biological Process: membrane lipid metabolic process (GO:0006643);; Biological Process: response to o…	--	Phospholipase D gamma 1 OS=Arabidopsis thaliana GN=PLDGAMMA1 PE=1 SV=1	PREDICTED: phospholipase D beta 1-like [Vitis vinifera]
GO:0009414	gi_351603123_gb_JP457482.1	3.85e-06	-3.47381	down	--	--	Molecular Function: protein binding (GO:0005515);; Molecular Function: ATP binding (GO:0005524);; Cellular Component: nucleus (GO:0005634);; Cellular Component: vacuole (GO:0005773);; Cellular Component: plasma membrane (GO:0005886);; Biological Process: ATP catabolic process (GO:0006200);; Biological Process: ATP biosynthetic process (GO:0006754);; Biological Process: cation transport (GO:000681…	K01535|1e-156|vvi:100242786|hypothetical protein LOC100242786	Plasma membrane ATPase 4 OS=Nicotiana plumbaginifolia GN=PMA4 PE=1 SV=1	Plasma membrane ATPase 4 isoform 2 [Theobroma cacao]
GO:0009414	gi_351617925_gb_JP472226.1	1.35e-08	-1.44788	down	[P]	Inorganic ion transport and metabolism	Molecular Function: protein binding (GO:0005515);; Molecular Function: ATP binding (GO:0005524);; Cellular Component: nucleus (GO:0005634);; Cellular Component: vacuole (GO:0005773);; Cellular Component: plasma membrane (GO:0005886);; Biological Process: ATP catabolic process (GO:0006200);; Biological Process: ATP biosynthetic process (GO:0006754);; Biological Process: cation transport (GO:000681…	K01535|0.0|vvi:100242786|hypothetical protein LOC100242786	Plasma membrane ATPase 4 OS=Nicotiana plumbaginifolia GN=PMA4 PE=1 SV=1	Plasma membrane ATPase 4 isoform 2 [Theobroma cacao]
GO:0009414	gi_351596344_gb_JP450901.1	5.09e-09	-1.42081	down	--	--	Molecular Function: protein binding (GO:0005515);; Molecular Function: ATP binding (GO:0005524);; Cellular Component: nucleus (GO:0005634);; Cellular Component: vacuole (GO:0005773);; Cellular Component: plasma membrane (GO:0005886);; Biological Process: ATP catabolic process (GO:0006200);; Biological Process: ATP biosynthetic process (GO:0006754);; Biological Process: cation transport (GO:000681…	K01535|0.0|vvi:100242786|hypothetical protein LOC100242786	Plasma membrane ATPase 4 OS=Nicotiana plumbaginifolia GN=PMA4 PE=1 SV=1	hypothetical protein VITISV_014422 [Vitis vinifera]
GO:0009414	gi_351618788_gb_JP473089.1	0.00215799	1.25546	up	[V]	Defense mechanisms	Molecular Function: ATP binding (GO:0005524);; Cellular Component: mitochondrion (GO:0005739);; Cellular Component: vacuolar membrane (GO:0005774);; Cellular Component: cytosol (GO:0005829);; Cellular Component: plasma membrane (GO:0005886);; Biological Process: ATP catabolic process (GO:0006200);; Biological Process: protein targeting to membrane (GO:0006612);; Biological Process: drug transmemb…	--	Pleiotropic drug resistance protein 1 OS=Nicotiana tabacum GN=PDR1 PE=2 SV=1	Pleiotropic drug resistance 12 [Theobroma cacao]
GO:0009414	gi_351625347_gb_JP479648.1	0.00051434	-1.98982	down	[V]	Defense mechanisms	Molecular Function: ATP binding (GO:0005524);; Cellular Component: mitochondrion (GO:0005739);; Cellular Component: vacuolar membrane (GO:0005774);; Cellular Component: cytosol (GO:0005829);; Cellular Component: plasma membrane (GO:0005886);; Biological Process: ATP catabolic process (GO:0006200);; Biological Process: protein targeting to membrane (GO:0006612);; Biological Process: drug transmemb…	--	Pleiotropic drug resistance protein 2 OS=Nicotiana plumbaginifolia GN=PDR2 PE=2 SV=1	PREDICTED: pleiotropic drug resistance protein 2-like isoform 2 [Fragaria vesca subsp. vesca]
GO:0009414	gi_351598838_gb_JP453346.1	2.12e-08	-1.92664	down	[V]	Defense mechanisms	Molecular Function: ATP binding (GO:0005524);; Cellular Component: mitochondrion (GO:0005739);; Cellular Component: vacuolar membrane (GO:0005774);; Cellular Component: cytosol (GO:0005829);; Cellular Component: plasma membrane (GO:0005886);; Biological Process: ATP catabolic process (GO:0006200);; Biological Process: protein targeting to membrane (GO:0006612);; Biological Process: drug transmemb…	--	Pleiotropic drug resistance protein 2 OS=Nicotiana plumbaginifolia GN=PDR2 PE=2 SV=1	hypothetical protein PRUPE_ppa000212mg [Prunus persica]
GO:0009414	gi_351625354_gb_JP479655.1	0.000695109	-2.54607	down	--	--	Molecular Function: hydrolase activity, hydrolyzing O-glycosyl compounds (GO:0004553);; Biological Process: sucrose biosynthetic process (GO:0005986);; Biological Process: response to oxidative stress (GO:0006979);; Biological Process: metabolic process (GO:0008152);; Biological Process: response to water deprivation (GO:0009414);; Cellular Component: chloroplast (GO:0009507);; Biological Process…	--	Probable galactinol--sucrose galactosyltransferase 2 OS=Arabidopsis thaliana GN=RFS2 PE=2 SV=2	PREDICTED: probable galactinol--sucrose galactosyltransferase 2-like [Fragaria vesca subsp. vesca]
GO:0009414	gi_351597475_gb_JP452020.1	0.000371636	3.87222	up	--	--	Molecular Function: hydrolase activity, hydrolyzing O-glycosyl compounds (GO:0004553);; Cellular Component: cytoplasm (GO:0005737);; Cellular Component: plasma membrane (GO:0005886);; Biological Process: sucrose biosynthetic process (GO:0005986);; Biological Process: response to oxidative stress (GO:0006979);; Biological Process: response to water deprivation (GO:0009414);; Cellular Component: pl…	--	Probable galactinol--sucrose galactosyltransferase 2 OS=Arabidopsis thaliana GN=RFS2 PE=2 SV=2	Seed imbibition 2 isoform 1 [Theobroma cacao]
GO:0009414	gi_351598594_gb_JP453109.1	0.000811741	1.11391	up	[P]	Inorganic ion transport and metabolism	Cellular Component: Golgi membrane (GO:0000139);; Molecular Function: monooxygenase activity (GO:0004497);; Molecular Function: N,N-dimethylaniline monooxygenase activity (GO:0004499);; Cellular Component: nucleoplasm (GO:0005654);; Cellular Component: endoplasmic reticulum membrane (GO:0005789);; Cellular Component: cytosol (GO:0005829);; Biological Process: response to water deprivation (GO:000…	--	Probable indole-3-pyruvate monooxygenase YUCCA10 OS=Arabidopsis thaliana GN=YUC10 PE=2 SV=1	hypothetical protein PRUPE_ppa007054mg [Prunus persica]
GO:0009414	gi_351619868_gb_JP474169.1	5.13e-07	-2.23566	down	[T]	Signal transduction mechanisms	Molecular Function: phosphoprotein phosphatase activity (GO:0004721);; Molecular Function: protein serine/threonine phosphatase activity (GO:0004722);; Molecular Function: protein binding (GO:0005515);; Cellular Component: nucleus (GO:0005634);; Cellular Component: mitochondrion (GO:0005739);; Cellular Component: plasma membrane (GO:0005886);; Biological Process: glucose catabolic process (GO:000…	--	Probable protein phosphatase 2C 33 OS=Arabidopsis thaliana GN=PPC6-1 PE=1 SV=1	PREDICTED: probable protein phosphatase 2C 72-like [Vitis vinifera]
GO:0009414	gi_351618741_gb_JP473042.1	1.05e-14	1.72986	up	[T]	Signal transduction mechanisms	Molecular Function: protein serine/threonine phosphatase activity (GO:0004722);; Molecular Function: protein binding (GO:0005515);; Cellular Component: nucleus (GO:0005634);; Cellular Component: Golgi apparatus (GO:0005794);; Cellular Component: cytosol (GO:0005829);; Biological Process: negative regulation of protein kinase activity (GO:0006469);; Biological Process: protein dephosphorylation (G…	K14497|0.0|vvi:100243875|hypothetical protein LOC100243875	Probable protein phosphatase 2C 6 OS=Oryza sativa subsp. japonica GN=Os01g0583100 PE=2 SV=1	hypothetical protein PRUPE_ppa006926mg [Prunus persica]
GO:0009414	gi_351623117_gb_JP477418.1	2.96e-24	2.50435	up	[T]	Signal transduction mechanisms	Molecular Function: phosphoprotein phosphatase activity (GO:0004721);; Molecular Function: protein serine/threonine phosphatase activity (GO:0004722);; Molecular Function: protein binding (GO:0005515);; Cellular Component: nucleus (GO:0005634);; Cellular Component: Golgi apparatus (GO:0005794);; Cellular Component: cytosol (GO:0005829);; Cellular Component: plasma membrane (GO:0005886);; Biologic…	K14497|1e-160|pop:POPTR_768154|hypothetical protein	Probable protein phosphatase 2C 78 OS=Arabidopsis thaliana GN=At5g59220 PE=2 SV=1	Highly ABA-induced PP2C gene 2 isoform 1 [Theobroma cacao]
GO:0009414	gi_351623983_gb_JP478284.1	4.1e-14	1.74154	up	[T]	Signal transduction mechanisms	Molecular Function: phosphoprotein phosphatase activity (GO:0004721);; Molecular Function: protein serine/threonine phosphatase activity (GO:0004722);; Molecular Function: protein binding (GO:0005515);; Cellular Component: nucleus (GO:0005634);; Cellular Component: Golgi apparatus (GO:0005794);; Cellular Component: cytosol (GO:0005829);; Biological Process: negative regulation of protein kinase a…	K14497|1e-116|rcu:RCOM_1579770|protein phosphatase 2c, putative (EC:3.1.3.16)	Probable protein phosphatase 2C 8 OS=Oryza sativa subsp. japonica GN=Os01g0656200 PE=2 SV=1	hypothetical protein PRUPE_ppa016016mg [Prunus persica]
GO:0009414	gi_351599415_gb_JP453911.1	1.47e-07	-2.13157	down	--	--	Biological Process: polysaccharide biosynthetic process (GO:0000271);; Cellular Component: extracellular region (GO:0005576);; Cellular Component: cell wall (GO:0005618);; Cellular Component: Golgi apparatus (GO:0005794);; Biological Process: cellular glucan metabolic process (GO:0006073);; Biological Process: pattern specification process (GO:0007389);; Biological Process: regulation of cell siz…	K08235|1e-155|pop:POPTR_718004|hypothetical protein	Probable xyloglucan endotransglucosylase/hydrolase protein 6 OS=Arabidopsis thaliana GN=XTH6 PE=2 SV=2	xyloglucan endotransglucosylase/hydrolase 2 [Rosa x borboniana]
GO:0009414	gi_351605979_gb_JP460317.1	1.28e-14	-2.04082	down	--	--	Molecular Function: aspartic-type endopeptidase activity (GO:0004190);; Cellular Component: extracellular region (GO:0005576);; Cellular Component: endoplasmic reticulum (GO:0005783);; Biological Process: proteolysis (GO:0006508);; Biological Process: defense response (GO:0006952);; Biological Process: response to water deprivation (GO:0009414);; Biological Process: salicylic acid metabolic proce…	--	Protein ASPARTIC PROTEASE IN GUARD CELL 2 OS=Arabidopsis thaliana GN=ASPG2 PE=2 SV=1	Aspartic proteinase nepenthesin-1, putative [Theobroma cacao]
GO:0009414	gi_351598523_gb_JP453040.1	2.51e-22	2.32916	up	[I]	Lipid transport and metabolism	Molecular Function: iron ion binding (GO:0005506);; Cellular Component: mitochondrion (GO:0005739);; Biological Process: fatty acid biosynthetic process (GO:0006633);; Biological Process: response to water deprivation (GO:0009414);; Biological Process: wax biosynthetic process (GO:0010025);; Biological Process: cutin biosynthetic process (GO:0010143);; Cellular Component: membrane (GO:0016020);; …	--	Protein ECERIFERUM 1 OS=Arabidopsis thaliana GN=CER1 PE=1 SV=1	hypothetical protein PRUPE_ppa002893mg [Prunus persica]
GO:0009414	gi_351615767_gb_JP470068.1	1.95e-08	2.18477	up	[KAD]	--	Molecular Function: DNA binding (GO:0003677);; Molecular Function: chromatin binding (GO:0003682);; Molecular Function: sequence-specific DNA binding transcription factor activity (GO:0003700);; Molecular Function: binding (GO:0005488);; Cellular Component: nucleus (GO:0005634);; Biological Process: response to water deprivation (GO:0009414);; Biological Process: response to wounding (GO:0009611)…	K09422|1e-126|pop:POPTR_648134|MYB018	Protein ODORANT1 OS=Petunia hybrida GN=ODO1 PE=2 SV=1	Myb domain protein 20 [Theobroma cacao]
GO:0009414	gi_351600776_gb_JP455237.1	4.45e-11	3.15327	up	[T]	Signal transduction mechanisms	Molecular Function: protein serine/threonine phosphatase activity (GO:0004722);; Molecular Function: protein binding (GO:0005515);; Cellular Component: nucleus (GO:0005634);; Cellular Component: Golgi apparatus (GO:0005794);; Cellular Component: cytosol (GO:0005829);; Cellular Component: plasma membrane (GO:0005886);; Biological Process: negative regulation of protein kinase activity (GO:0006469)…	K14497|2e-28|pop:POPTR_172527|hypothetical protein	Protein phosphatase 2C 37 OS=Arabidopsis thaliana GN=PP2CA PE=1 SV=1	hypothetical protein PRUPE_ppa026727mg, partial [Prunus persica]
GO:0009414	gi_351620096_gb_JP474397.1	8.17e-08	1.36061	up	[T]	Signal transduction mechanisms	Molecular Function: protein serine/threonine phosphatase activity (GO:0004722);; Molecular Function: protein binding (GO:0005515);; Cellular Component: nucleus (GO:0005634);; Cellular Component: Golgi apparatus (GO:0005794);; Cellular Component: cytosol (GO:0005829);; Biological Process: negative regulation of protein kinase activity (GO:0006469);; Biological Process: protein dephosphorylation (G…	K14497|1e-177|rcu:RCOM_1046460|protein phosphatase 2c, putative (EC:3.1.3.16)	Protein phosphatase 2C 77 OS=Arabidopsis thaliana GN=ABI2 PE=1 SV=1	hypothetical protein PRUPE_ppa005286mg [Prunus persica]
GO:0009414	gi_351599816_gb_JP454300.1	0.000112097	Inf	up	[GEPR]	--	Cellular Component: plasma membrane (GO:0005886);; Biological Process: response to water deprivation (GO:0009414);; Biological Process: response to nematode (GO:0009624);; Biological Process: gravitropism (GO:0009630);; Cellular Component: plant-type vacuole membrane (GO:0009705);; Biological Process: response to zinc ion (GO:0010043);; Biological Process: basipetal auxin transport (GO:0010540);;…	--	Protein ZINC INDUCED FACILITATOR 1 OS=Arabidopsis thaliana GN=ZIF1 PE=1 SV=2	Zinc induced facilitator-like 1 isoform 1 [Theobroma cacao]
GO:0009414	gi_351621839_gb_JP476140.1	0.000549623	1.45066	up	[GEPR]	--	Cellular Component: plasma membrane (GO:0005886);; Biological Process: response to water deprivation (GO:0009414);; Biological Process: response to nematode (GO:0009624);; Biological Process: gravitropism (GO:0009630);; Cellular Component: plant-type vacuole membrane (GO:0009705);; Biological Process: response to zinc ion (GO:0010043);; Biological Process: basipetal auxin transport (GO:0010540);;…	--	Protein ZINC INDUCED FACILITATOR-LIKE 1 OS=Arabidopsis thaliana GN=ZIFL1 PE=2 SV=1	hypothetical protein PRUPE_ppa004919mg [Prunus persica]
GO:0009414	gi_351599628_gb_JP454117.1	4.76e-06	-1.08625	down	--	--	Biological Process: MAPK cascade (GO:0000165);; Biological Process: respiratory burst involved in defense response (GO:0002679);; Molecular Function: peroxidase activity (GO:0004601);; Molecular Function: calcium ion binding (GO:0005509);; Cellular Component: nucleus (GO:0005634);; Cellular Component: Golgi apparatus (GO:0005794);; Cellular Component: integral to plasma membrane (GO:0005887);; Bi…	--	Putative respiratory burst oxidase homolog protein H OS=Arabidopsis thaliana GN=RBOHH PE=3 SV=1	PREDICTED: putative respiratory burst oxidase homolog protein H-like [Cicer arietinum]
GO:0009414	gi_351623232_gb_JP477533.1	1.57e-05	1.73051	up	[R]	General function prediction only	Cellular Component: Golgi membrane (GO:0000139);; Biological Process: eye development (GO:0001654);; Biological Process: nematode larval development (GO:0002119);; Molecular Function: GTP binding (GO:0005525);; Cellular Component: peroxisome (GO:0005777);; Cellular Component: plasma membrane (GO:0005886);; Biological Process: protein targeting to vacuole (GO:0006623);; Biological Process: ER to G…	--	Ras-related protein RABC2a OS=Arabidopsis thaliana GN=RABC2A PE=1 SV=1	predicted protein [Populus trichocarpa]
GO:0009414	gi_351619662_gb_JP473963.1	1.09e-06	1.28249	up	[RTKL]	--	Molecular Function: nucleotide binding (GO:0000166);; Biological Process: activation of MAPKK activity (GO:0000186);; Biological Process: activation of MAPK activity (GO:0000187);; Biological Process: defense response to oomycetes (GO:0002229);; Molecular Function: MAP kinase kinase kinase activity (GO:0004709);; Molecular Function: protein serine/threonine/tyrosine kinase activity (GO:0004712);;…	--	Serine/threonine-protein kinase HT1 OS=Arabidopsis thaliana GN=HT1 PE=1 SV=1	hypothetical protein PRUPE_ppa007843mg [Prunus persica]
GO:0009414	gi_351623634_gb_JP477935.1	6.55e-08	1.28883	up	[RTKL]	--	Molecular Function: protein serine/threonine kinase activity (GO:0004674);; Molecular Function: protein binding (GO:0005515);; Molecular Function: ATP binding (GO:0005524);; Cellular Component: nucleus (GO:0005634);; Cellular Component: cytosol (GO:0005829);; Cellular Component: plasma membrane (GO:0005886);; Biological Process: sucrose metabolic process (GO:0005985);; Biological Process: protein…	K14498|0.0|rcu:RCOM_0855720|Serine/threonine-protein kinase SAPK3, putative (EC:2.7.11.1)	Serine/threonine-protein kinase SAPK3 OS=Oryza sativa subsp. japonica GN=SAPK3 PE=1 SV=1	Serine/threonine-protein kinase SAPK3, putative [Ricinus communis]
GO:0009414	gi_351599807_gb_JP454291.1	0.00372143	-3.44425	down	[IQR]	--	Molecular Function: copper ion binding (GO:0005507);; Cellular Component: mitochondrion (GO:0005739);; Cellular Component: cytosol (GO:0005829);; Biological Process: proline biosynthetic process (GO:0006561);; Biological Process: steroid metabolic process (GO:0008202);; Molecular Function: zinc ion binding (GO:0008270);; Biological Process: response to heat (GO:0009408);; Biological Process: resp…	--	Short-chain dehydrogenase reductase 2a OS=Arabidopsis thaliana GN=SDR2a PE=3 SV=1	PREDICTED: sex determination protein tasselseed-2 [Vitis vinifera]
GO:0009414	gi_351629092_gb_JP481975.1	1.01e-05	-1.95557	down	[HC]	--	Biological Process: polysaccharide biosynthetic process (GO:0000271);; Molecular Function: squalene monooxygenase activity (GO:0004506);; Cellular Component: extracellular region (GO:0005576);; Cellular Component: endoplasmic reticulum membrane (GO:0005789);; Biological Process: cholesterol biosynthetic process (GO:0006695);; Biological Process: cellular aromatic compound metabolic process (GO:00…	K00511|0.0|vvi:100254037|hypothetical protein LOC100254037	Squalene monooxygenase OS=Panax ginseng PE=2 SV=1	hypothetical protein PRUPE_ppa003991mg [Prunus persica]
GO:0009414	gi_351624450_gb_JP478751.1	0.000242402	-1.29757	down	[HC]	--	Biological Process: polysaccharide biosynthetic process (GO:0000271);; Molecular Function: squalene monooxygenase activity (GO:0004506);; Cellular Component: extracellular region (GO:0005576);; Cellular Component: endoplasmic reticulum (GO:0005783);; Biological Process: cellular aromatic compound metabolic process (GO:0006725);; Biological Process: cholesterol metabolic process (GO:0008203);; Bio…	K00511|0.0|vvi:100265235|hypothetical protein LOC100265235	Squalene monooxygenase OS=Panax ginseng PE=2 SV=1	squalene epoxidase [Camellia oleifera]
GO:0009414	gi_351621474_gb_JP475775.1	2.53e-08	2.6817	up	--	--	Molecular Function: hydrolase activity, hydrolyzing O-glycosyl compounds (GO:0004553);; Cellular Component: cytoplasm (GO:0005737);; Cellular Component: plasma membrane (GO:0005886);; Biological Process: sucrose biosynthetic process (GO:0005986);; Biological Process: galactose metabolic process (GO:0006012);; Biological Process: response to oxidative stress (GO:0006979);; Biological Process: resp…	K06611|0.0|vvi:100245269|hypothetical protein LOC100245269	Stachyose synthase OS=Pisum sativum GN=STS1 PE=1 SV=1	hypothetical protein PRUPE_ppa001276mg [Prunus persica]
GO:0009414	gi_351628305_gb_JP481188.1	0.000320852	-1.2895	down	[GEPR]	--	Molecular Function: sugar:hydrogen symporter activity (GO:0005351);; Cellular Component: nucleus (GO:0005634);; Cellular Component: vacuolar membrane (GO:0005774);; Cellular Component: Golgi apparatus (GO:0005794);; Cellular Component: plasma membrane (GO:0005886);; Biological Process: response to water deprivation (GO:0009414);; Cellular Component: chloroplast (GO:0009507);; Biological Process: …	--	Sugar transporter ERD6-like 7 OS=Arabidopsis thaliana GN=At2g48020 PE=2 SV=2	PREDICTED: sugar transporter ERD6-like 7-like [Fragaria vesca subsp. vesca]
GO:0009414	gi_351619722_gb_JP474023.1	0.00211832	-1.55385	down	--	--	Molecular Function: protein binding (GO:0005515);; Cellular Component: plasma membrane (GO:0005886);; Biological Process: glycerol ether metabolic process (GO:0006662);; Biological Process: response to oxidative stress (GO:0006979);; Biological Process: cell communication (GO:0007154);; Molecular Function: electron carrier activity (GO:0009055);; Biological Process: response to heat (GO:0009408);…	--	Thioredoxin-like protein CDSP32, chloroplastic OS=Arabidopsis thaliana GN=CDSP32 PE=1 SV=1	conserved hypothetical protein [Ricinus communis]
GO:0009414	gi_351606158_gb_JP460491.1	5.77e-06	2.57594	up	[KAD]	--	Biological Process: negative regulation of transcription from RNA polymerase II promoter (GO:0000122);; Molecular Function: sequence-specific DNA binding transcription factor activity (GO:0003700);; Molecular Function: protein binding (GO:0005515);; Biological Process: chromatin remodeling (GO:0006338);; Biological Process: response to stress (GO:0006950);; Biological Process: blood coagulation (…	K09422|2e-70|pop:POPTR_1083038|hypothetical protein	Transcription factor MYB44 OS=Arabidopsis thaliana GN=MYB44 PE=2 SV=1	PREDICTED: transcription factor MYB44-like [Fragaria vesca subsp. vesca]
GO:0009414	gi_351601723_gb_JP456164.1	0.0029004	-1.32167	down	--	--	Biological Process: regulation of cell growth by extracellular stimulus (GO:0001560);; Molecular Function: L-alanine:2-oxoglutarate aminotransferase activity (GO:0004021);; Molecular Function: L-aspartate:2-oxoglutarate aminotransferase activity (GO:0004069);; Molecular Function: cystathionine beta-lyase activity (GO:0004121);; Molecular Function: L-tyrosine:2-oxoglutarate aminotransferase activi…	--	Tyrosine aminotransferase OS=Arabidopsis thaliana GN=TAT PE=2 SV=1	hypothetical protein VITISV_037882 [Vitis vinifera]
GO:0009414	gi_351624575_gb_JP478876.1	9.83e-08	-1.38427	down	[HC]	--	Biological Process: cellular aromatic compound metabolic process (GO:0006725);; Biological Process: response to osmotic stress (GO:0006970);; Biological Process: response to heat (GO:0009408);; Biological Process: response to water deprivation (GO:0009414);; Cellular Component: chloroplast thylakoid membrane (GO:0009535);; Molecular Function: zeaxanthin epoxidase [overall] activity (GO:0009540);;…	K09838|0.0|vvi:100232944|ZEP	Zeaxanthin epoxidase, chloroplastic OS=Prunus armeniaca PE=2 SV=1	PREDICTED: zeaxanthin epoxidase, chloroplastic-like [Cucumis sativus]
GO:0009414	gi_351612557_gb_JP466858.1	0.00330515	-1.14664	down	--	--	Molecular Function: DNA binding (GO:0003677);; Molecular Function: sequence-specific DNA binding transcription factor activity (GO:0003700);; Molecular Function: protein binding (GO:0005515);; Cellular Component: nucleus (GO:0005634);; Biological Process: response to xenobiotic stimulus (GO:0009410);; Biological Process: response to water deprivation (GO:0009414);; Biological Process: gibberellin…	--	ZF-HD homeobox protein At4g24660 OS=Arabidopsis thaliana GN=At4g24660 PE=1 SV=1	Mini zinc finger 2 isoform 1 [Theobroma cacao]
GO:0009414	gi_351617683_gb_JP471984.1	0.00397427	1.49569	up	[R]	General function prediction only	Cellular Component: nucleus (GO:0005634);; Biological Process: protein targeting to membrane (GO:0006612);; Biological Process: response to stress (GO:0006950);; Biological Process: signal transduction (GO:0007165);; Molecular Function: zinc ion binding (GO:0008270);; Biological Process: toxin catabolic process (GO:0009407);; Biological Process: response to water deprivation (GO:0009414);; Biolog…	--	Zinc finger AN1 domain-containing stress-associated protein 12 OS=Arabidopsis thaliana GN=SAP12 PE=2 SV=2	hypothetical protein PRUPE_ppa011876mg [Prunus persica]
GO:0009414	gi_351597028_gb_JP451580.1	3.05e-06	1.17107	up	--	--	Cellular Component: nucleus (GO:0005634);; Biological Process: response to oxidative stress (GO:0006979);; Biological Process: response to cold (GO:0009409);; Biological Process: response to water deprivation (GO:0009414);; Biological Process: response to wounding (GO:0009611);; Biological Process: response to high light intensity (GO:0009644);; Biological Process: response to salt stress (GO:000…	--	Zinc finger protein ZAT10 OS=Arabidopsis thaliana GN=ZAT10 PE=2 SV=1	zinc finger protein, putative [Ricinus communis]
