# Supplementary material for: Genome-Wide Expression Profiles of Hemp (Cannabis sativa L.) in Response to Drought Stress
Source: Int J Genomics. 2018 May 15;2018:3057272. doi: 10.1155/2018/3057272 (PMC5976996; doi:10.1155/2018/3057272)
Supplement: Supplementary 7 — Table S6: details of DEGs annotated as transcription factor. [file 3057272.f7.xls]

## Sheet: TFs
GENES	#ID	FDR	log2FC	regulated	COG_class	COG_class_annotation	GO_annotation	KEGG_annotation	Swissprot_annotation	nr_annotation
AP2/ERF	gi_351612777_gb_JP467078.1	2.28e-05	1.02553	up	--	--	Biological Process: respiratory burst involved in defense response (GO:0002679);; Molecular Function: sequence-specific DNA binding transcription factor activity (GO:0003700);; Molecular Function: protein binding (GO:0005515);; Cellular Component: nucleolus (GO:0005730);; Cellular Component: cytoplasm (GO:0005737);; Biological Process: transcription, DNA-dependent (GO:0006351);; Biological Proces…	--	Ethylene-responsive transcription factor RAP2-4 OS=Arabidopsis thaliana GN=RAP2-4 PE=1 SV=1	putative dehydration-responsive element binding protein [Broussonetia papyrifera]
AP2/ERF	gi_351615181_gb_JP469482.1	0.00265375	-1.54699	down	--	--	--	K09284|4e-21|vvi:100246815|hypothetical protein LOC100246815	AP2-like ethylene-responsive transcription factor TOE3 OS=Arabidopsis thaliana GN=TOE3 PE=2 SV=1	unnamed protein product [Vitis vinifera]
B3	gi_351604400_gb_JP458752.1	2.36e-24	-8.23806	down	--	--	Molecular Function: protein binding (GO:0005515);; Cellular Component: nucleus (GO:0005634);; Cellular Component: plasma membrane (GO:0005886);; Biological Process: cellular protein localization (GO:0034613);; Biological Process: regulation of biological process (GO:0050789);;	--	B3 domain-containing transcription factor VRN1 OS=Arabidopsis thaliana GN=VRN1 PE=1 SV=1	unnamed protein product [Vitis vinifera]
B3	gi_351606227_gb_JP460556.1	2.81e-137	#NAME?	down	--	--	Molecular Function: protein binding (GO:0005515);; Cellular Component: nucleus (GO:0005634);; Cellular Component: plasma membrane (GO:0005886);; Biological Process: cellular protein localization (GO:0034613);; Biological Process: regulation of biological process (GO:0050789);;	--	B3 domain-containing transcription factor VRN1 OS=Arabidopsis thaliana GN=VRN1 PE=1 SV=1	PREDICTED: uncharacterized protein LOC101294583 [Fragaria vesca subsp. vesca]
B3	gi_351618362_gb_JP472663.1	5.54e-30	-7.43553	down	--	--	Molecular Function: binding (GO:0005488);; Cellular Component: nucleus (GO:0005634);; Cellular Component: vacuole (GO:0005773);; Biological Process: protein localization (GO:0008104);; Biological Process: cellular process (GO:0009987);; Cellular Component: intracellular organelle part (GO:0044446);; Biological Process: regulation of biological process (GO:0050789);;	--	Putative B3 domain-containing protein REM15 OS=Arabidopsis thaliana GN=REM15.15 PE=3 SV=2	AP2/B3-like transcriptional factor family protein, putative [Theobroma cacao]
B3	gi_351629415_gb_JP482298.1	1.27e-24	-6.53245	down	--	--	Molecular Function: protein binding (GO:0005515);; Cellular Component: nucleus (GO:0005634);; Cellular Component: plasma membrane (GO:0005886);; Biological Process: cellular protein localization (GO:0034613);; Biological Process: regulation of biological process (GO:0050789);;	--	B3 domain-containing protein REM19 OS=Arabidopsis thaliana GN=REM19 PE=2 SV=1	PREDICTED: B3 domain-containing protein LOC_Os12g40080-like [Fragaria vesca subsp. vesca]
B3	gi_351618361_gb_JP472662.1	0.000306003	#NAME?	down	--	--	Cellular Component: nucleus (GO:0005634);;	--	B3 domain-containing protein At1g49475 OS=Arabidopsis thaliana GN=At1g49475 PE=2 SV=2	hypothetical protein PRUPE_ppa018806mg [Prunus persica]
bHLH	gi_351622653_gb_JP476954.1	6.15e-06	-1.12736	down	--	--	Molecular Function: DNA binding (GO:0003677);; Molecular Function: sequence-specific DNA binding transcription factor activity (GO:0003700);; Cellular Component: nucleus (GO:0005634);; Biological Process: regulation of transcription, DNA-dependent (GO:0006355);; Biological Process: fatty acid catabolic process (GO:0009062);; Biological Process: jasmonic acid metabolic process (GO:0009694);; Biolo…	--	Transcription factor UNE12 OS=Arabidopsis thaliana GN=UNE12 PE=2 SV=2	hypothetical protein PRUPE_ppa008172mg [Prunus persica]
bHLH	gi_351620287_gb_JP474588.1	1.51e-14	-2.01071	down	--	--	Molecular Function: DNA binding (GO:0003677);; Molecular Function: sequence-specific DNA binding transcription factor activity (GO:0003700);; Molecular Function: binding (GO:0005488);; Cellular Component: nucleus (GO:0005634);; Biological Process: regulation of transcription, DNA-dependent (GO:0006355);; Biological Process: fatty acid catabolic process (GO:0009062);; Biological Process: jasmonic …	--	Transcription factor bHLH48 OS=Arabidopsis thaliana GN=BHLH48 PE=2 SV=1	PREDICTED: transcription factor bHLH60-like [Cucumis sativus]
bHLH	gi_351597378_gb_JP451925.1	0.00569091	2.25721	up	--	--	Biological Process: mitotic cell cycle (GO:0000278);; Molecular Function: DNA binding (GO:0003677);; Molecular Function: sequence-specific DNA binding transcription factor activity (GO:0003700);; Cellular Component: nucleus (GO:0005634);; Biological Process: regulation of transcription, DNA-dependent (GO:0006355);; Biological Process: RNA processing (GO:0006396);; Biological Process: sulfur compo…	--	Transcription factor bHLH87 OS=Arabidopsis thaliana GN=BHLH87 PE=2 SV=1	Basic helix-loop-helix DNA-binding superfamily protein, putative isoform 2 [Theobroma cacao]
bHLH	gi_351619113_gb_JP473414.1	0.00581511	-1.07796	down	--	--	Molecular Function: DNA binding (GO:0003677);; Molecular Function: sequence-specific DNA binding transcription factor activity (GO:0003700);; Cellular Component: nucleus (GO:0005634);; Biological Process: regulation of transcription, DNA-dependent (GO:0006355);; Biological Process: anthocyanin-containing compound biosynthetic process (GO:0009718);; Biological Process: response to sucrose stimulus…	--	Transcription factor ILR3 OS=Arabidopsis thaliana GN=ILR3 PE=1 SV=1	hypothetical protein PRUPE_ppa010730mg [Prunus persica]
bHLH	gi_351618111_gb_JP472412.1	0.00159422	1.01826	up	--	--	Molecular Function: DNA binding (GO:0003677);; Molecular Function: sequence-specific DNA binding transcription factor activity (GO:0003700);; Cellular Component: nucleus (GO:0005634);; Biological Process: regulation of transcription, DNA-dependent (GO:0006355);; Biological Process: glycine catabolic process (GO:0006546);; Biological Process: unsaturated fatty acid biosynthetic process (GO:0006636…	--	Transcription factor PIF1 OS=Arabidopsis thaliana GN=PIF1 PE=1 SV=1	unnamed protein product [Vitis vinifera]
bHLH	gi_351606711_gb_JP461037.1	6.5e-06	-1.12771	down	[Z]	Cytoskeleton	Biological Process: mitotic sister chromatid segregation (GO:0000070);; Molecular Function: nucleotide binding (GO:0000166);; Cellular Component: condensed chromosome kinetochore (GO:0000777);; Biological Process: cell plate assembly (GO:0000919);; Molecular Function: microtubule motor activity (GO:0003777);; Cellular Component: nucleus (GO:0005634);; Cellular Component: cytoplasm (GO:0005737);; …	--	Kinesin-like protein NACK2 OS=Arabidopsis thaliana GN=NACK2 PE=1 SV=1	hypothetical protein PRUPE_ppa001038mg [Prunus persica]
bZIP	gi_351621532_gb_JP475833.1	0.00416534	-1.08884	down	--	--	Biological Process: MAPK cascade (GO:0000165);; Molecular Function: DNA binding (GO:0003677);; Molecular Function: sequence-specific DNA binding transcription factor activity (GO:0003700);; Molecular Function: calmodulin binding (GO:0005516);; Cellular Component: nucleus (GO:0005634);; Cellular Component: cytoplasm (GO:0005737);; Biological Process: regulation of transcription, DNA-dependent (GO:…	K14431|1e-146|vvi:100255706|hypothetical protein LOC100255706	Transcription factor TGA7 OS=Arabidopsis thaliana GN=TGA7 PE=1 SV=1	PREDICTED: transcription factor TGA4 [Vitis vinifera]
bZIP	gi_351600718_gb_JP455180.1	0.00798365	Inf	up	--	--	Biological Process: MAPK cascade (GO:0000165);; Molecular Function: DNA binding (GO:0003677);; Molecular Function: sequence-specific DNA binding transcription factor activity (GO:0003700);; Cellular Component: nucleus (GO:0005634);; Biological Process: protein targeting to membrane (GO:0006612);; Biological Process: response to bacterium (GO:0009617);; Biological Process: systemic acquired resist…	--	Transcription factor FAMA OS=Arabidopsis thaliana GN=FMA PE=1 SV=1	hypothetical protein PRUPE_ppa020429mg [Prunus persica]
bZIP	gi_351609416_gb_JP463717.1	0.000459229	-3.49045	down	--	--	Molecular Function: sequence-specific DNA binding transcription factor activity (GO:0003700);; Molecular Function: protein binding (GO:0005515);; Cellular Component: nucleus (GO:0005634);; Biological Process: regulation of transcription, DNA-dependent (GO:0006355);; Biological Process: signal transduction (GO:0007165);; Biological Process: response to xenobiotic stimulus (GO:0009410);; Biological…	--	Transcription factor VIP1 OS=Arabidopsis thaliana GN=VIP1 PE=1 SV=1	PREDICTED: transcription factor VIP1-like [Fragaria vesca subsp. vesca]
C2H2L	gi_351612852_gb_JP467153.1	0.000378405	-1.13798	down	--	--	Molecular Function: nucleic acid binding (GO:0003676);; Molecular Function: binding (GO:0005488);; Cellular Component: nucleus (GO:0005634);; Biological Process: iron ion transport (GO:0006826);; Biological Process: regulation of meristem growth (GO:0010075);; Biological Process: cellular response to iron ion starvation (GO:0010106);; Biological Process: response to nitrate (GO:0010167);; Biologi…	--	Zinc finger protein MAGPIE OS=Arabidopsis thaliana GN=MGP PE=1 SV=1	C2H2L domain class transcription factor [Malus domestica]
C2H2L	gi_351615669_gb_JP469970.1	0.00712737	1.25487	up	--	--	Biological Process: developmental process involved in reproduction (GO:0003006);; Molecular Function: DNA binding (GO:0003677);; Biological Process: regulation of transcription, DNA-dependent (GO:0006355);; Biological Process: response to oxidative stress (GO:0006979);; Biological Process: signal transduction (GO:0007165);; Biological Process: response to heat (GO:0009408);; Biological Process: r…	--	Zinc finger protein ZAT12 OS=Arabidopsis thaliana GN=ZAT12 PE=2 SV=1	C2H2L domain class transcription factor [Malus domestica]
Dof	gi_351615523_gb_JP469824.1	0.00627011	-1.27263	down	--	--	Molecular Function: DNA binding (GO:0003677);; Molecular Function: sequence-specific DNA binding transcription factor activity (GO:0003700);; Cellular Component: nucleus (GO:0005634);; Biological Process: regulation of transcription, DNA-dependent (GO:0006355);; Biological Process: tissue development (GO:0009888);; Biological Process: root development (GO:0048364);; Biological Process: cell wall …	--	Dof zinc finger protein DOF2.5 OS=Arabidopsis thaliana GN=DOF2.5 PE=2 SV=3	hypothetical protein PRUPE_ppa010132mg [Prunus persica]
HD-Zip	gi_351611952_gb_JP466253.1	0.00326306	-3.8409	down	[K]	Transcription	Molecular Function: sequence-specific DNA binding transcription factor activity (GO:0003700);; Cellular Component: nucleus (GO:0005634);; Biological Process: response to water deprivation (GO:0009414);; Cellular Component: plastid (GO:0009536);; Biological Process: response to virus (GO:0009615);; Biological Process: gravitropism (GO:0009630);; Biological Process: response to blue light (GO:00096…	--	Homeobox-leucine zipper protein ATHB-16 OS=Arabidopsis thaliana GN=ATHB-16 PE=2 SV=2	hypothetical protein PRUPE_ppa009419mg [Prunus persica]
HD-Zip	gi_351620398_gb_JP474699.1	6.55e-08	-1.48295	down	[K]	Transcription	Molecular Function: transcription regulatory region sequence-specific DNA binding (GO:0000976);; Molecular Function: sequence-specific DNA binding transcription factor activity (GO:0003700);; Cellular Component: nucleus (GO:0005634);; Biological Process: regulation of transcription, DNA-dependent (GO:0006355);; Biological Process: response to desiccation (GO:0009269);; Biological Process: respons…	--	Homeobox-leucine zipper protein ATHB-13 OS=Arabidopsis thaliana GN=ATHB-13 PE=2 SV=2	HD domain class transcription factor [Theobroma cacao]
HD-Zip	gi_351612830_gb_JP467131.1	2.96e-09	1.49743	up	--	--	Molecular Function: DNA binding (GO:0003677);; Cellular Component: nucleus (GO:0005634);; Biological Process: response to water deprivation (GO:0009414);; Biological Process: response to virus (GO:0009615);; Biological Process: response to salt stress (GO:0009651);; Biological Process: response to abscisic acid stimulus (GO:0009737);; Biological Process: positive regulation of transcription, DNA-…	--	Homeobox-leucine zipper protein ATHB-12 OS=Arabidopsis thaliana GN=ATHB-12 PE=2 SV=1	predicted protein [Populus trichocarpa]
HD-Zip	gi_351610521_gb_JP464822.1	0.00326298	1.58144	up	--	--	Molecular Function: transcription regulatory region sequence-specific DNA binding (GO:0000976);; Molecular Function: sequence-specific DNA binding transcription factor activity (GO:0003700);; Cellular Component: nucleus (GO:0005634);; Biological Process: response to desiccation (GO:0009269);; Biological Process: response to cold (GO:0009409);; Biological Process: response to water deprivation (GO…	--	Homeobox-leucine zipper protein ATHB-7 OS=Arabidopsis thaliana GN=ATHB-7 PE=2 SV=2	homeobox leucine zipper [Rosa rugosa]
HD-Zip	gi_351615003_gb_JP469304.1	0.00143909	1.3885	up	[K]	Transcription	Molecular Function: transcription regulatory region sequence-specific DNA binding (GO:0000976);; Molecular Function: sequence-specific DNA binding transcription factor activity (GO:0003700);; Cellular Component: nucleus (GO:0005634);; Biological Process: transcription, DNA-dependent (GO:0006351);; Biological Process: response to desiccation (GO:0009269);; Biological Process: response to cold (GO:…	--	Homeobox-leucine zipper protein ATHB-12 OS=Arabidopsis thaliana GN=ATHB-12 PE=2 SV=1	PREDICTED: homeobox-leucine zipper protein ATHB-7-like [Fragaria vesca subsp. vesca]
KNOX	gi_351612133_gb_JP466434.1	0.00690186	-1.18865	down	--	--	Biological Process: cell fate specification (GO:0001708);; Molecular Function: DNA binding (GO:0003677);; Molecular Function: sequence-specific DNA binding transcription factor activity (GO:0003700);; Molecular Function: protein binding (GO:0005515);; Cellular Component: nucleus (GO:0005634);; Biological Process: regulation of transcription, DNA-dependent (GO:0006355);; Biological Process: fatty …	--	Homeobox protein SBH1 OS=Glycine max GN=H1 PE=2 SV=1	KNOX/ELK homeobox transcription factor isoform 1 [Theobroma cacao]
KNOX	gi_351621955_gb_JP476256.1	0.00151678	-1.00567	down	--	--	Molecular Function: sequence-specific DNA binding transcription factor activity (GO:0003700);; Molecular Function: protein binding (GO:0005515);; Cellular Component: nucleus (GO:0005634);; Cellular Component: cytosol (GO:0005829);; Biological Process: cell adhesion (GO:0007155);; Biological Process: response to light stimulus (GO:0009416);; Biological Process: detection of cytokinin stimulus (GO:…	--	Homeobox protein HD1 OS=Brassica napus GN=HD1 PE=2 SV=1	KNOTTED-like homeobox of 7 [Theobroma cacao]
LHY	gi_351612890_gb_JP467191.1	0.00125436	1.17807	up	--	--	Molecular Function: DNA binding (GO:0003677);; Molecular Function: chromatin binding (GO:0003682);; Molecular Function: sequence-specific DNA binding transcription factor activity (GO:0003700);; Cellular Component: nucleus (GO:0005634);; Biological Process: response to cold (GO:0009409);; Biological Process: response to red or far red light (GO:0009639);; Biological Process: response to salt stre…	--	Protein LHY OS=Arabidopsis thaliana GN=LHY PE=1 SV=2	transcription factor LHY [Populus nigra]
MYB	gi_351622388_gb_JP476689.1	0.00771662	-1.61573	down	[KAD]	--	Biological Process: negative regulation of transcription from RNA polymerase II promoter (GO:0000122);; Molecular Function: DNA binding (GO:0003677);; Molecular Function: chromatin binding (GO:0003682);; Molecular Function: sequence-specific DNA binding transcription factor activity (GO:0003700);; Molecular Function: protein binding (GO:0005515);; Cellular Component: nucleus (GO:0005634);; Biolog…	K09422|0.0|vvi:100246639|hypothetical protein LOC100246639	Myb-related protein B OS=Xenopus laevis GN=mybl2 PE=2 SV=2	unnamed protein product [Vitis vinifera]
MYB	gi_351599509_gb_JP454002.1	7.33e-05	-1.13388	down	--	--	Biological Process: transcription, DNA-dependent (GO:0006351);; Biological Process: signal transduction (GO:0007165);; Biological Process: heart development (GO:0007507);; Molecular Function: cytoskeletal protein binding (GO:0008092);; Biological Process: organ morphogenesis (GO:0009887);; Biological Process: tissue development (GO:0009888);; Biological Process: regulation of metabolic process (G…	--	Myb-like protein V OS=Dictyostelium discoideum GN=mybV PE=4 SV=2	hypothetical protein PRUPE_ppa000661mg [Prunus persica]
MYB	gi_351595865_gb_JP450425.1	0.000283422	-1.10914	down	--	--	Molecular Function: two-component response regulator activity (GO:0000156);; Molecular Function: DNA binding (GO:0003677);; Molecular Function: sequence-specific DNA binding transcription factor activity (GO:0003700);; Molecular Function: binding (GO:0005488);; Molecular Function: protein binding (GO:0005515);; Cellular Component: nucleus (GO:0005634);; Biological Process: rRNA processing (GO:000…	--	Myb family transcription factor APL OS=Arabidopsis thaliana GN=APL PE=2 SV=2	hypothetical protein PRUPE_ppa006561mg [Prunus persica]
MYB	gi_351606158_gb_JP460491.1	5.77e-06	2.57594	up	[KAD]	--	Biological Process: negative regulation of transcription from RNA polymerase II promoter (GO:0000122);; Molecular Function: sequence-specific DNA binding transcription factor activity (GO:0003700);; Molecular Function: protein binding (GO:0005515);; Biological Process: chromatin remodeling (GO:0006338);; Biological Process: response to stress (GO:0006950);; Biological Process: blood coagulation (…	K09422|2e-70|pop:POPTR_1083038|hypothetical protein	Transcription factor MYB44 OS=Arabidopsis thaliana GN=MYB44 PE=2 SV=1	PREDICTED: transcription factor MYB44-like [Fragaria vesca subsp. vesca]
MYB	gi_351617093_gb_JP471394.1	0.000724145	1.05465	up	--	--	Molecular Function: binding (GO:0005488);; Molecular Function: protein binding (GO:0005515);; Cellular Component: nucleus (GO:0005634);; Biological Process: response to cold (GO:0009409);; Biological Process: response to salt stress (GO:0009651);; Biological Process: response to ethylene stimulus (GO:0009723);; Biological Process: response to auxin stimulus (GO:0009733);; Biological Process: resp…	--	Protein CCA1 OS=Arabidopsis thaliana GN=CCA1 PE=1 SV=1	MYBR domain class transcription factor [Malus domestica]
MYB	gi_351615767_gb_JP470068.1	1.95e-08	2.18477	up	[KAD]	--	Molecular Function: DNA binding (GO:0003677);; Molecular Function: chromatin binding (GO:0003682);; Molecular Function: sequence-specific DNA binding transcription factor activity (GO:0003700);; Molecular Function: binding (GO:0005488);; Cellular Component: nucleus (GO:0005634);; Biological Process: response to water deprivation (GO:0009414);; Biological Process: response to wounding (GO:0009611)…	K09422|1e-126|pop:POPTR_648134|MYB018	Protein ODORANT1 OS=Petunia hybrida GN=ODO1 PE=2 SV=1	Myb domain protein 20 [Theobroma cacao]
MYB	gi_351621748_gb_JP476049.1	3.98e-06	1.31497	up	--	--	Molecular Function: DNA binding (GO:0003677);; Molecular Function: chromatin binding (GO:0003682);; Molecular Function: sequence-specific DNA binding transcription factor activity (GO:0003700);; Cellular Component: nucleus (GO:0005634);; Cellular Component: cytosol (GO:0005829);; Biological Process: regulation of transcription, DNA-dependent (GO:0006355);; Biological Process: response to stress (…	--	Transcription factor DIVARICATA OS=Antirrhinum majus GN=DIVARICATA PE=2 SV=1	hypothetical protein PRUPE_ppa010926mg [Prunus persica]
MYB1R1	gi_351598843_gb_JP453351.1	0.000467632	-1.70385	down	--	--	Molecular Function: DNA binding (GO:0003677);; Molecular Function: chromatin binding (GO:0003682);; Molecular Function: binding (GO:0005488);; Cellular Component: nucleus (GO:0005634);; Cellular Component: cytoplasm (GO:0005737);; Biological Process: regulation of transcription, DNA-dependent (GO:0006355);; Biological Process: flower development (GO:0009908);; Biological Process: determination of…	--	Transcription factor MYB1R1 OS=Solanum tuberosum PE=2 SV=1	conserved hypothetical protein [Ricinus communis]
MYB1R1	gi_351623872_gb_JP478173.1	5.01e-06	-1.20741	down	--	--	Molecular Function: nucleic acid binding (GO:0003676);; Biological Process: flower development (GO:0009908);; Cellular Component: intracellular part (GO:0044424);; Biological Process: determination of dorsal/ventral asymmetry (GO:0048262);;	--	Transcription factor MYB1R1 OS=Solanum tuberosum PE=2 SV=1	hypothetical protein PRUPE_ppa009283mg [Prunus persica]
NAC	gi_351597144_gb_JP451694.1	0.000574046	1.75577	up	--	--	Biological Process: MAPK cascade (GO:0000165);; Biological Process: response to hypoxia (GO:0001666);; Molecular Function: sequence-specific DNA binding transcription factor activity (GO:0003700);; Cellular Component: nucleus (GO:0005634);; Biological Process: trehalose biosynthetic process (GO:0005992);; Biological Process: proline biosynthetic process (GO:0006561);; Biological Process: protein …	--	NAC transcription factor 29 OS=Arabidopsis thaliana GN=NAC029 PE=2 SV=1	hypothetical protein PRUPE_ppa009455mg [Prunus persica]
NAC	gi_351604070_gb_JP458424.1	1.09e-05	1.17129	up	--	--	Biological Process: MAPK cascade (GO:0000165);; Biological Process: response to hypoxia (GO:0001666);; Molecular Function: DNA binding (GO:0003677);; Molecular Function: sequence-specific DNA binding transcription factor activity (GO:0003700);; Cellular Component: nucleus (GO:0005634);; Biological Process: regulation of transcription, DNA-dependent (GO:0006355);; Biological Process: protein targe…	--	NAC domain-containing protein 2 OS=Arabidopsis thaliana GN=NAC002 PE=2 SV=2	NAC family transcription factor 5 [Morella rubra]
NAC	gi_351597144_gb_JP451694.1	0.000574046	1.75577	up	--	--	Biological Process: MAPK cascade (GO:0000165);; Biological Process: response to hypoxia (GO:0001666);; Molecular Function: sequence-specific DNA binding transcription factor activity (GO:0003700);; Cellular Component: nucleus (GO:0005634);; Biological Process: trehalose biosynthetic process (GO:0005992);; Biological Process: proline biosynthetic process (GO:0006561);; Biological Process: protein …	--	NAC transcription factor 29 OS=Arabidopsis thaliana GN=NAC029 PE=2 SV=1	hypothetical protein PRUPE_ppa009455mg [Prunus persica]
NF-YA	gi_351621046_gb_JP475347.1	1.37e-09	1.47251	up	--	--	Molecular Function: DNA binding (GO:0003677);; Molecular Function: sequence-specific DNA binding transcription factor activity (GO:0003700);; Molecular Function: protein binding (GO:0005515);; Biological Process: regulation of transcription, DNA-dependent (GO:0006355);; Biological Process: transcription from RNA polymerase II promoter (GO:0006366);; Biological Process: response to water deprivati…	--	Nuclear transcription factor Y subunit A-9 OS=Arabidopsis thaliana GN=NFYA9 PE=2 SV=1	unnamed protein product [Vitis vinifera]
NF-YA	gi_351611914_gb_JP466215.1	2.54e-07	-1.40768	down	--	--	Molecular Function: DNA binding (GO:0003677);; Molecular Function: sequence-specific DNA binding transcription factor activity (GO:0003700);; Molecular Function: protein binding (GO:0005515);; Cellular Component: nucleoplasm (GO:0005654);; Biological Process: transcription from RNA polymerase II promoter (GO:0006366);; Biological Process: response to water deprivation (GO:0009414);; Biological Pr…	--	Nuclear transcription factor Y subunit A-8 OS=Arabidopsis thaliana GN=NFYA8 PE=2 SV=2	hypothetical protein PRUPE_ppa016008mg [Prunus persica]
SPB	gi_351602040_gb_JP456475.1	0.00120731	3.52115	up	--	--	Molecular Function: DNA binding (GO:0003677);; Molecular Function: sequence-specific DNA binding transcription factor activity (GO:0003700);; Cellular Component: nucleus (GO:0005634);; Cellular Component: plasma membrane (GO:0005886);; Biological Process: regulation of transcription, DNA-dependent (GO:0006355);; Cellular Component: chloroplast envelope (GO:0009941);; Biological Process: regulatio…	--	Squamosa promoter-binding-like protein 1 OS=Arabidopsis thaliana GN=SPL1 PE=1 SV=2	unnamed protein product [Vitis vinifera]
Trihelix	gi_351617435_gb_JP471736.1	0.00646555	1.36017	up	--	--	Molecular Function: binding (GO:0005488);; Biological Process: pattern specification process (GO:0007389);; Biological Process: petal development (GO:0048441);; Biological Process: floral organ morphogenesis (GO:0048444);; Biological Process: regulation of multicellular organismal process (GO:0051239);;	--	Trihelix transcription factor GTL2 OS=Arabidopsis thaliana GN=At5g28300 PE=2 SV=1	hypothetical protein PRUPE_ppa022417mg [Prunus persica]
WOX	gi_351607499_gb_JP461820.1	0.00834604	-1.239	down	--	--	Molecular Function: DNA binding (GO:0003677);; Molecular Function: sequence-specific DNA binding transcription factor activity (GO:0003700);; Molecular Function: protein binding (GO:0005515);; Cellular Component: nucleus (GO:0005634);; Biological Process: regulation of transcription, DNA-dependent (GO:0006355);; Biological Process: positive regulation of cell proliferation (GO:0008284);; Biologic…	--	WUSCHEL-related homeobox 8 OS=Oryza sativa subsp. japonica GN=WOX8 PE=2 SV=1	PREDICTED: WUSCHEL-related homeobox 8 [Vitis vinifera]
WRKY	gi_351606916_gb_JP461241.1	0.00689264	1.0661	up	--	--	Molecular Function: sequence-specific DNA binding transcription factor activity (GO:0003700);; Molecular Function: protein binding (GO:0005515);; Cellular Component: nucleus (GO:0005634);; Cellular Component: cytoplasm (GO:0005737);; Biological Process: amino acid transport (GO:0006865);; Biological Process: defense response (GO:0006952);; Biological Process: signal transduction (GO:0007165);; Mo…	K13424|1e-174|rcu:RCOM_0849600|transcription factor, putative	Probable WRKY transcription factor 33 OS=Arabidopsis thaliana GN=WRKY33 PE=1 SV=2	PREDICTED: probable WRKY transcription factor 33-like [Fragaria vesca subsp. vesca]
WRKY	gi_351624390_gb_JP478691.1	7.78e-06	-1.09672	down	--	--	Molecular Function: structural molecule activity (GO:0005198);; Molecular Function: protein binding (GO:0005515);; Cellular Component: extracellular region (GO:0005576);; Cellular Component: nucleus (GO:0005634);; Biological Process: cellular membrane fusion (GO:0006944);; Biological Process: nervous system development (GO:0007399);; Biological Process: microsporogenesis (GO:0009556);; Cellular C…	--	Probable WRKY transcription factor 19 OS=Arabidopsis thaliana GN=WRKY19 PE=2 SV=1	PREDICTED: uncharacterized protein LOC101302269 [Fragaria vesca subsp. vesca]
YABBY	gi_351619910_gb_JP474211.1	0.000825307	-2.44879	down	--	--	Molecular Function: sequence-specific DNA binding transcription factor activity (GO:0003700);; Molecular Function: protein binding (GO:0005515);; Cellular Component: nucleus (GO:0005634);; Biological Process: chromatin assembly or disassembly (GO:0006333);; Biological Process: regulation of transcription, DNA-dependent (GO:0006355);; Biological Process: response to abscisic acid stimulus (GO:0009…	--	Protein YABBY 4 OS=Oryza sativa subsp. japonica GN=YAB4 PE=2 SV=1	hypothetical protein PRUPE_ppa011209mg [Prunus persica]
ZF(CO-like)	gi_351612000_gb_JP466301.1	1.74e-06	Inf	up	--	--	Molecular Function: sequence-specific DNA binding transcription factor activity (GO:0003700);; Molecular Function: protein binding (GO:0005515);; Cellular Component: intracellular (GO:0005622);; Cellular Component: nucleolus (GO:0005730);; Cellular Component: plasma membrane (GO:0005886);; Biological Process: regulation of transcription, DNA-dependent (GO:0006355);; Biological Process: circadian …	--	Zinc finger protein CONSTANS-LIKE 2 OS=Arabidopsis thaliana GN=COL2 PE=1 SV=1	DNA binding protein, putative [Ricinus communis]
ZF(CO-like)	gi_351614347_gb_JP468648.1	0.000386777	-1.6971	down	--	--	Molecular Function: sequence-specific DNA binding transcription factor activity (GO:0003700);; Cellular Component: nucleus (GO:0005634);; Biological Process: DNA repair (GO:0006281);; Biological Process: transcription, DNA-dependent (GO:0006351);; Biological Process: circadian rhythm (GO:0007623);; Molecular Function: zinc ion binding (GO:0008270);; Biological Process: response to blue light (GO:…	--	Putative zinc finger protein CONSTANS-LIKE 11 OS=Arabidopsis thaliana GN=COL11 PE=3 SV=2	hypothetical protein PRUPE_ppa009719mg [Prunus persica]
ZF(CO-like)	gi_351591634_gb_JP450080.1	5.91e-05	-1.06331	down	--	--	Cellular Component: nucleolus (GO:0005730);; Biological Process: circadian rhythm (GO:0007623);; Biological Process: response to wounding (GO:0009611);; Biological Process: shade avoidance (GO:0009641);; Biological Process: chloroplast organization (GO:0009658);; Biological Process: response to hormone stimulus (GO:0009725);; Biological Process: coumarin biosynthetic process (GO:0009805);; Biolog…	--	Zinc finger protein CONSTANS-LIKE 15 OS=Arabidopsis thaliana GN=COL15 PE=2 SV=1	B-box type zinc finger protein with CCT domain, putative [Theobroma cacao]
ZF-HD	gi_351612557_gb_JP466858.1	0.00330515	-1.14664	down	--	--	Molecular Function: DNA binding (GO:0003677);; Molecular Function: sequence-specific DNA binding transcription factor activity (GO:0003700);; Molecular Function: protein binding (GO:0005515);; Cellular Component: nucleus (GO:0005634);; Biological Process: response to xenobiotic stimulus (GO:0009410);; Biological Process: response to water deprivation (GO:0009414);; Biological Process: gibberellin…	--	ZF-HD homeobox protein At4g24660 OS=Arabidopsis thaliana GN=At4g24660 PE=1 SV=1	Mini zinc finger 2 isoform 1 [Theobroma cacao]
